# Supplementary material
Source: MDPI journal article supplement (https://www.mdpi.com/2571-9408/5/2/38)
Supplement: s1 [file s1]

SF1

# **Vaalan lukio**

**Geoheritage and climate change opening  
the secrets of home**

**Erasmus+-project week  
Verbania, Italy, autumn 2016**



# Visiting CERN - European organization for nuclear research. Geneva, Switzerland.

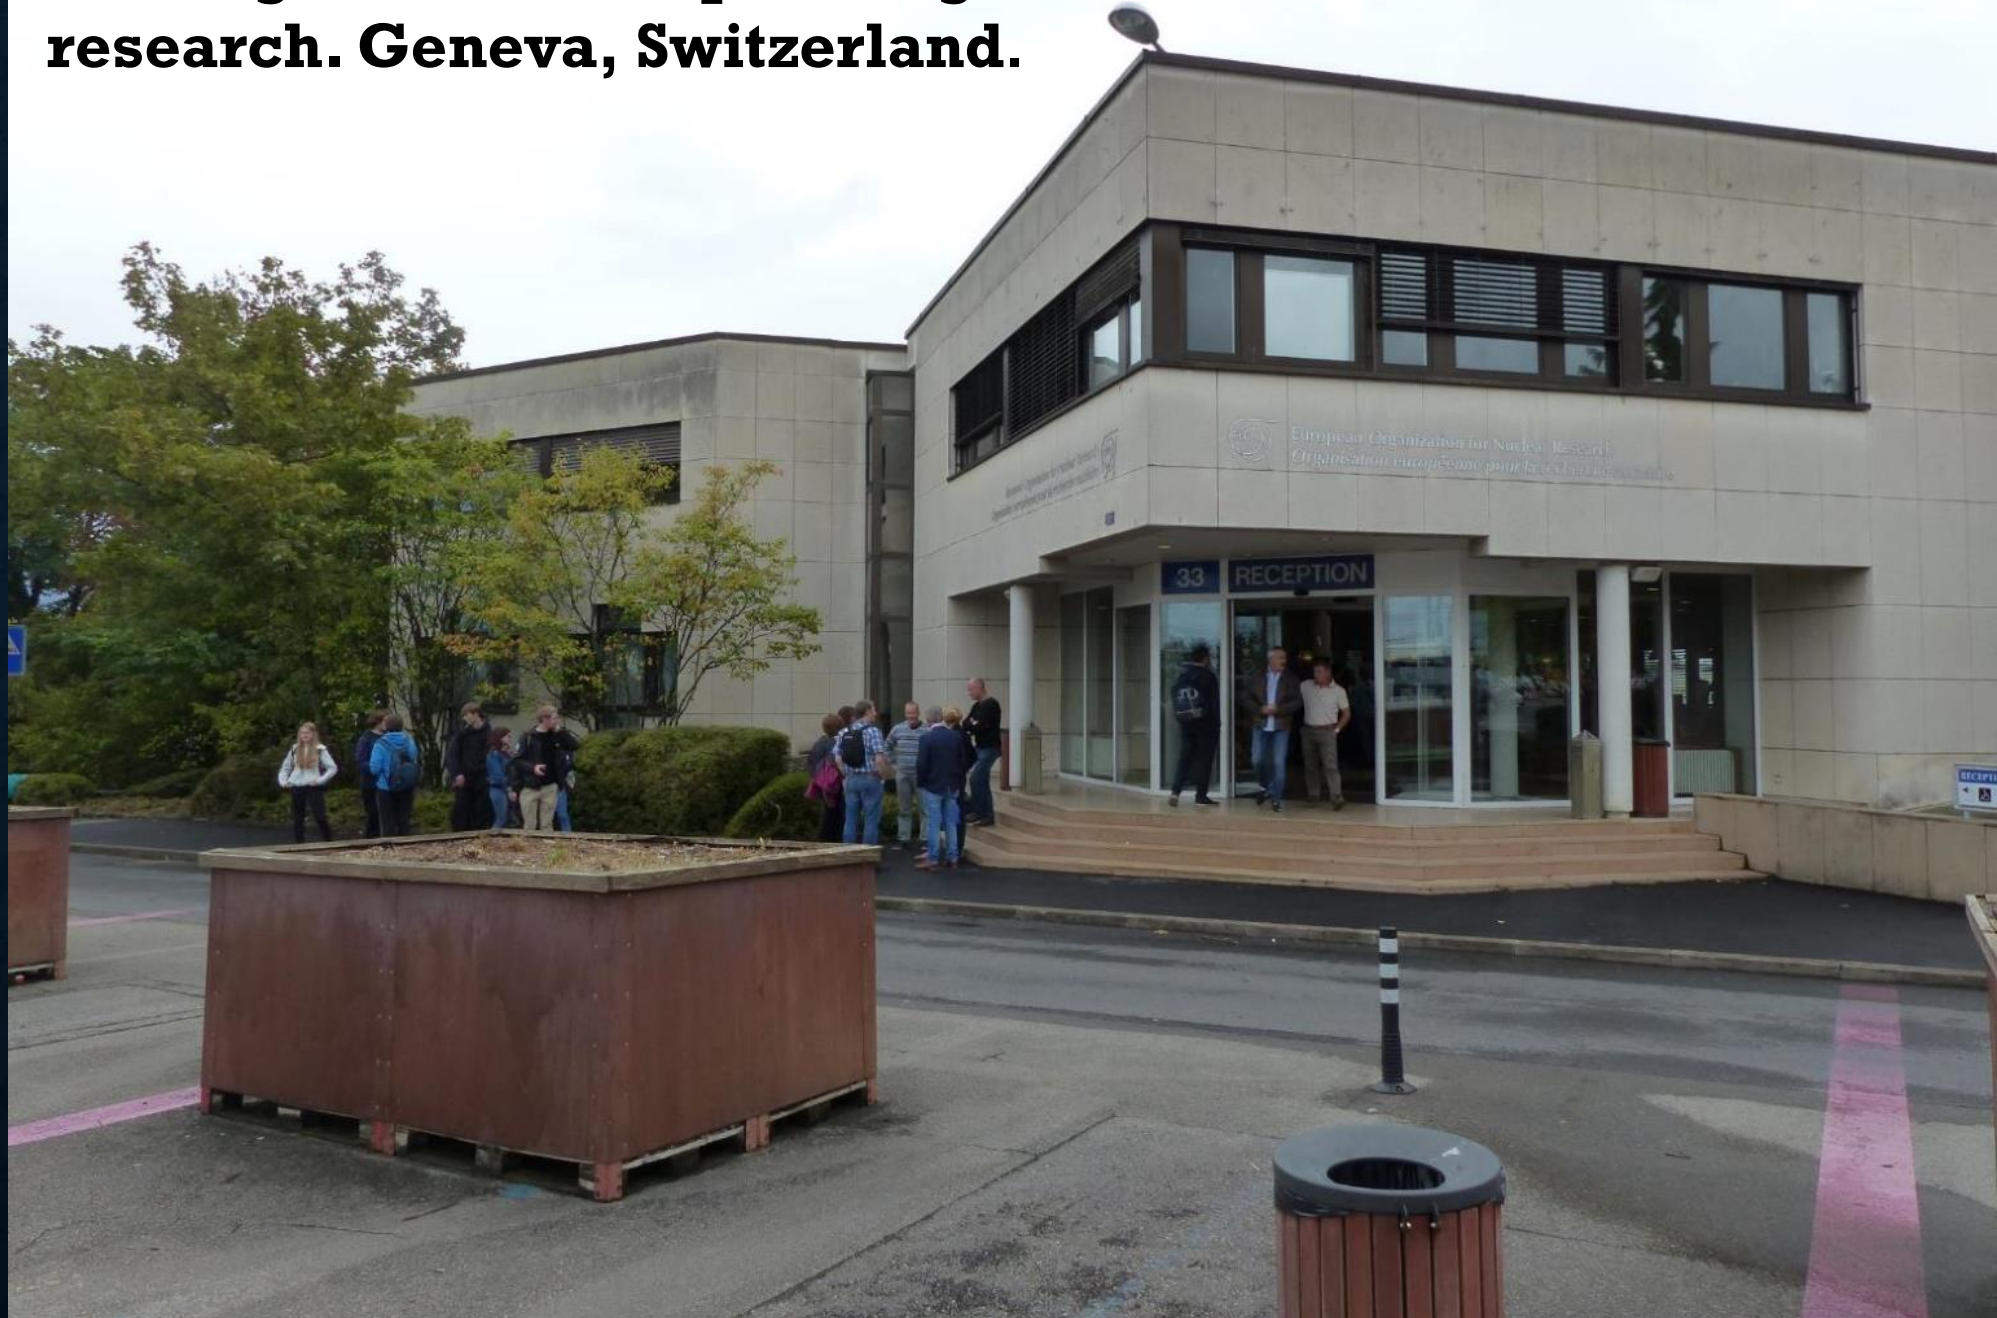



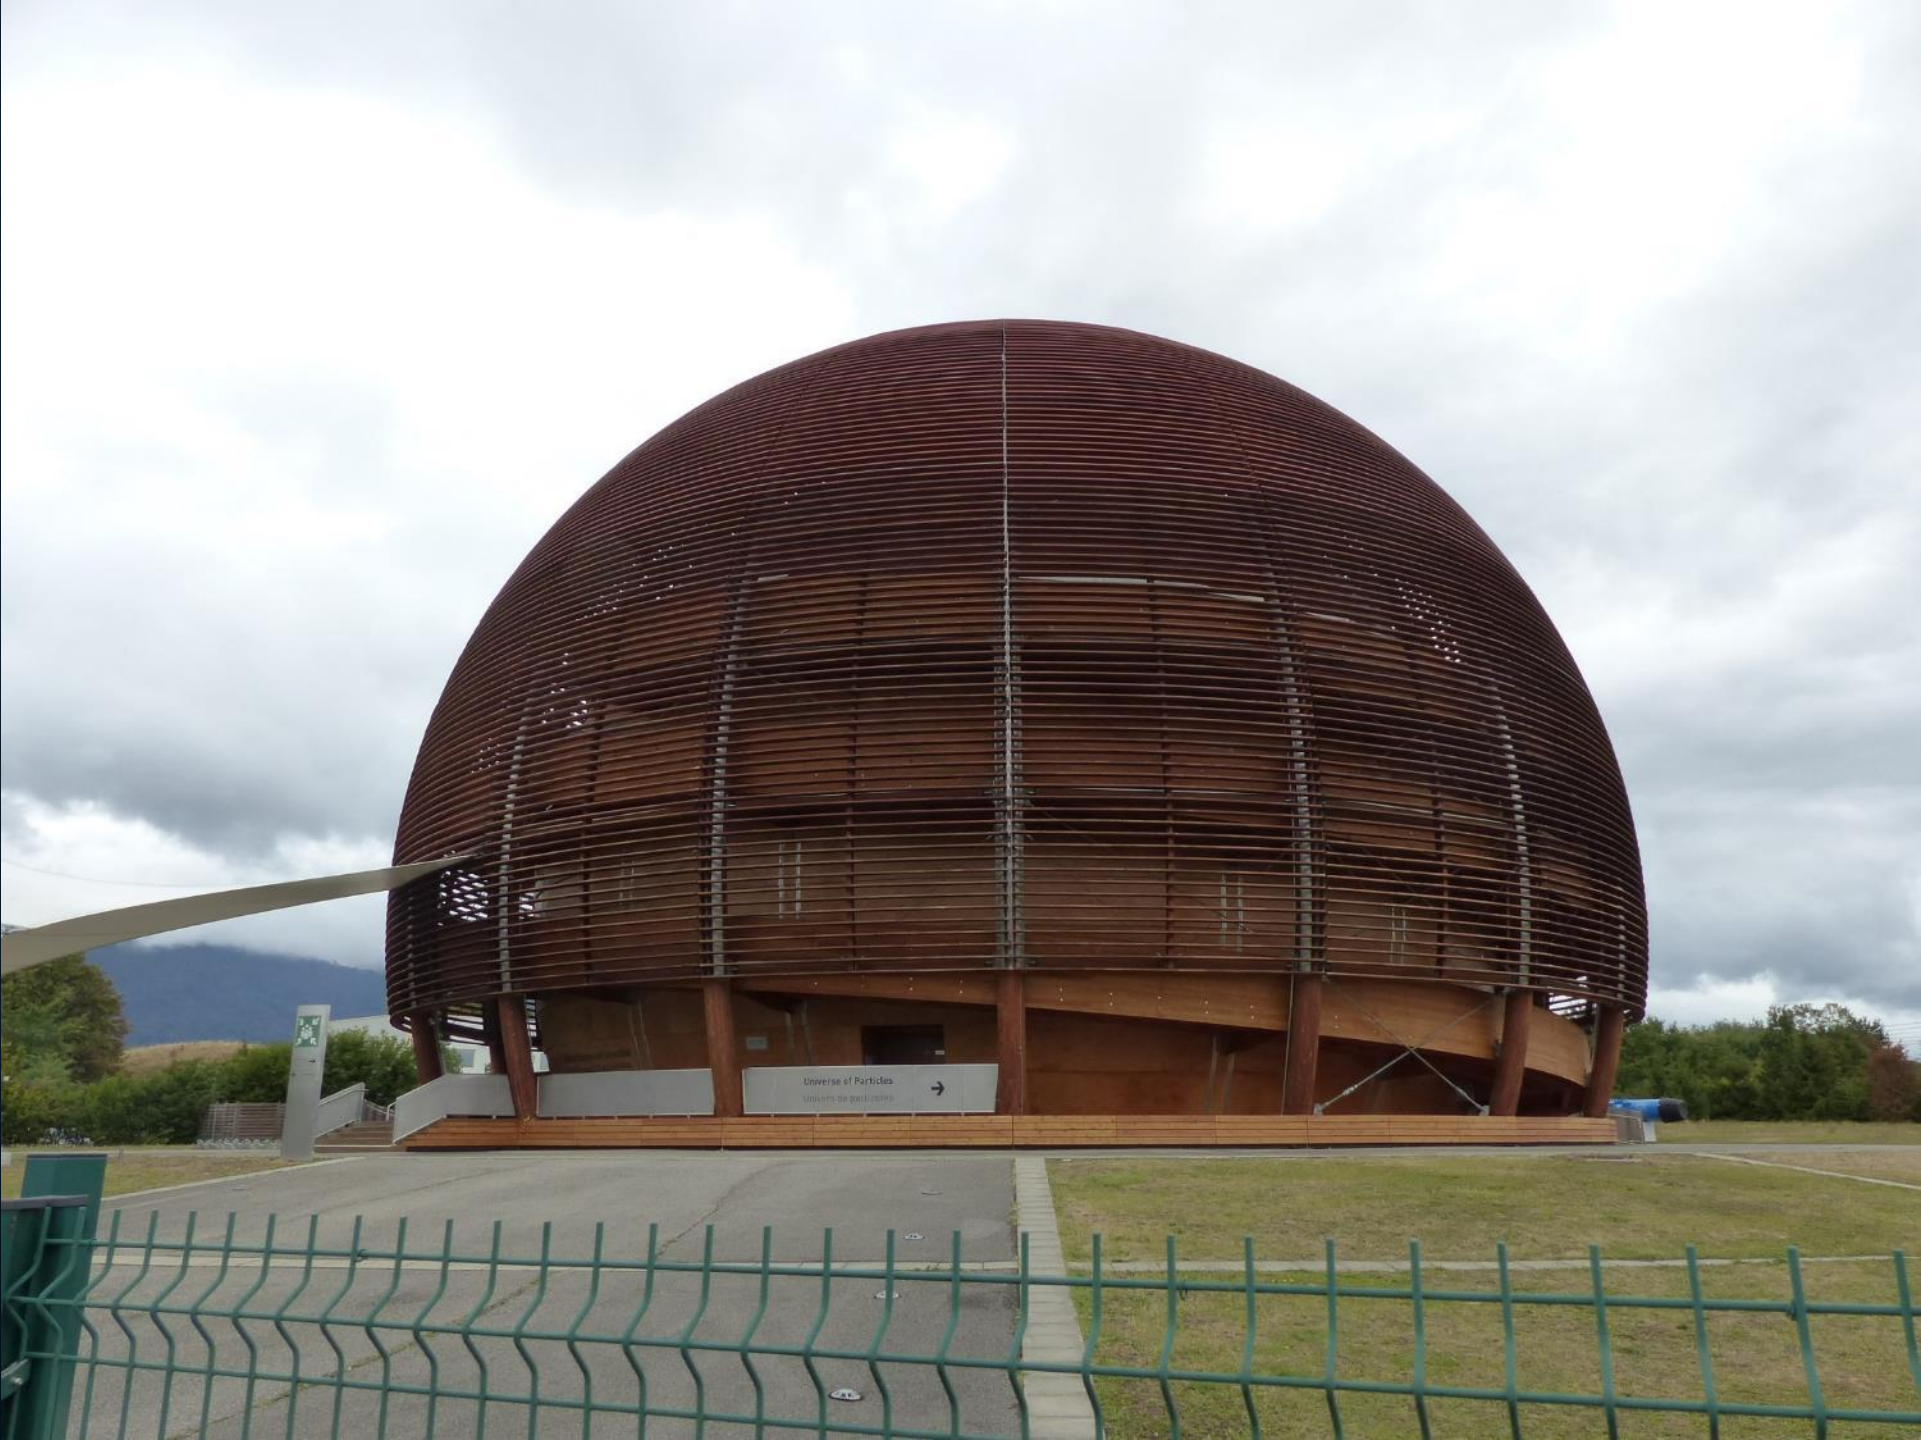



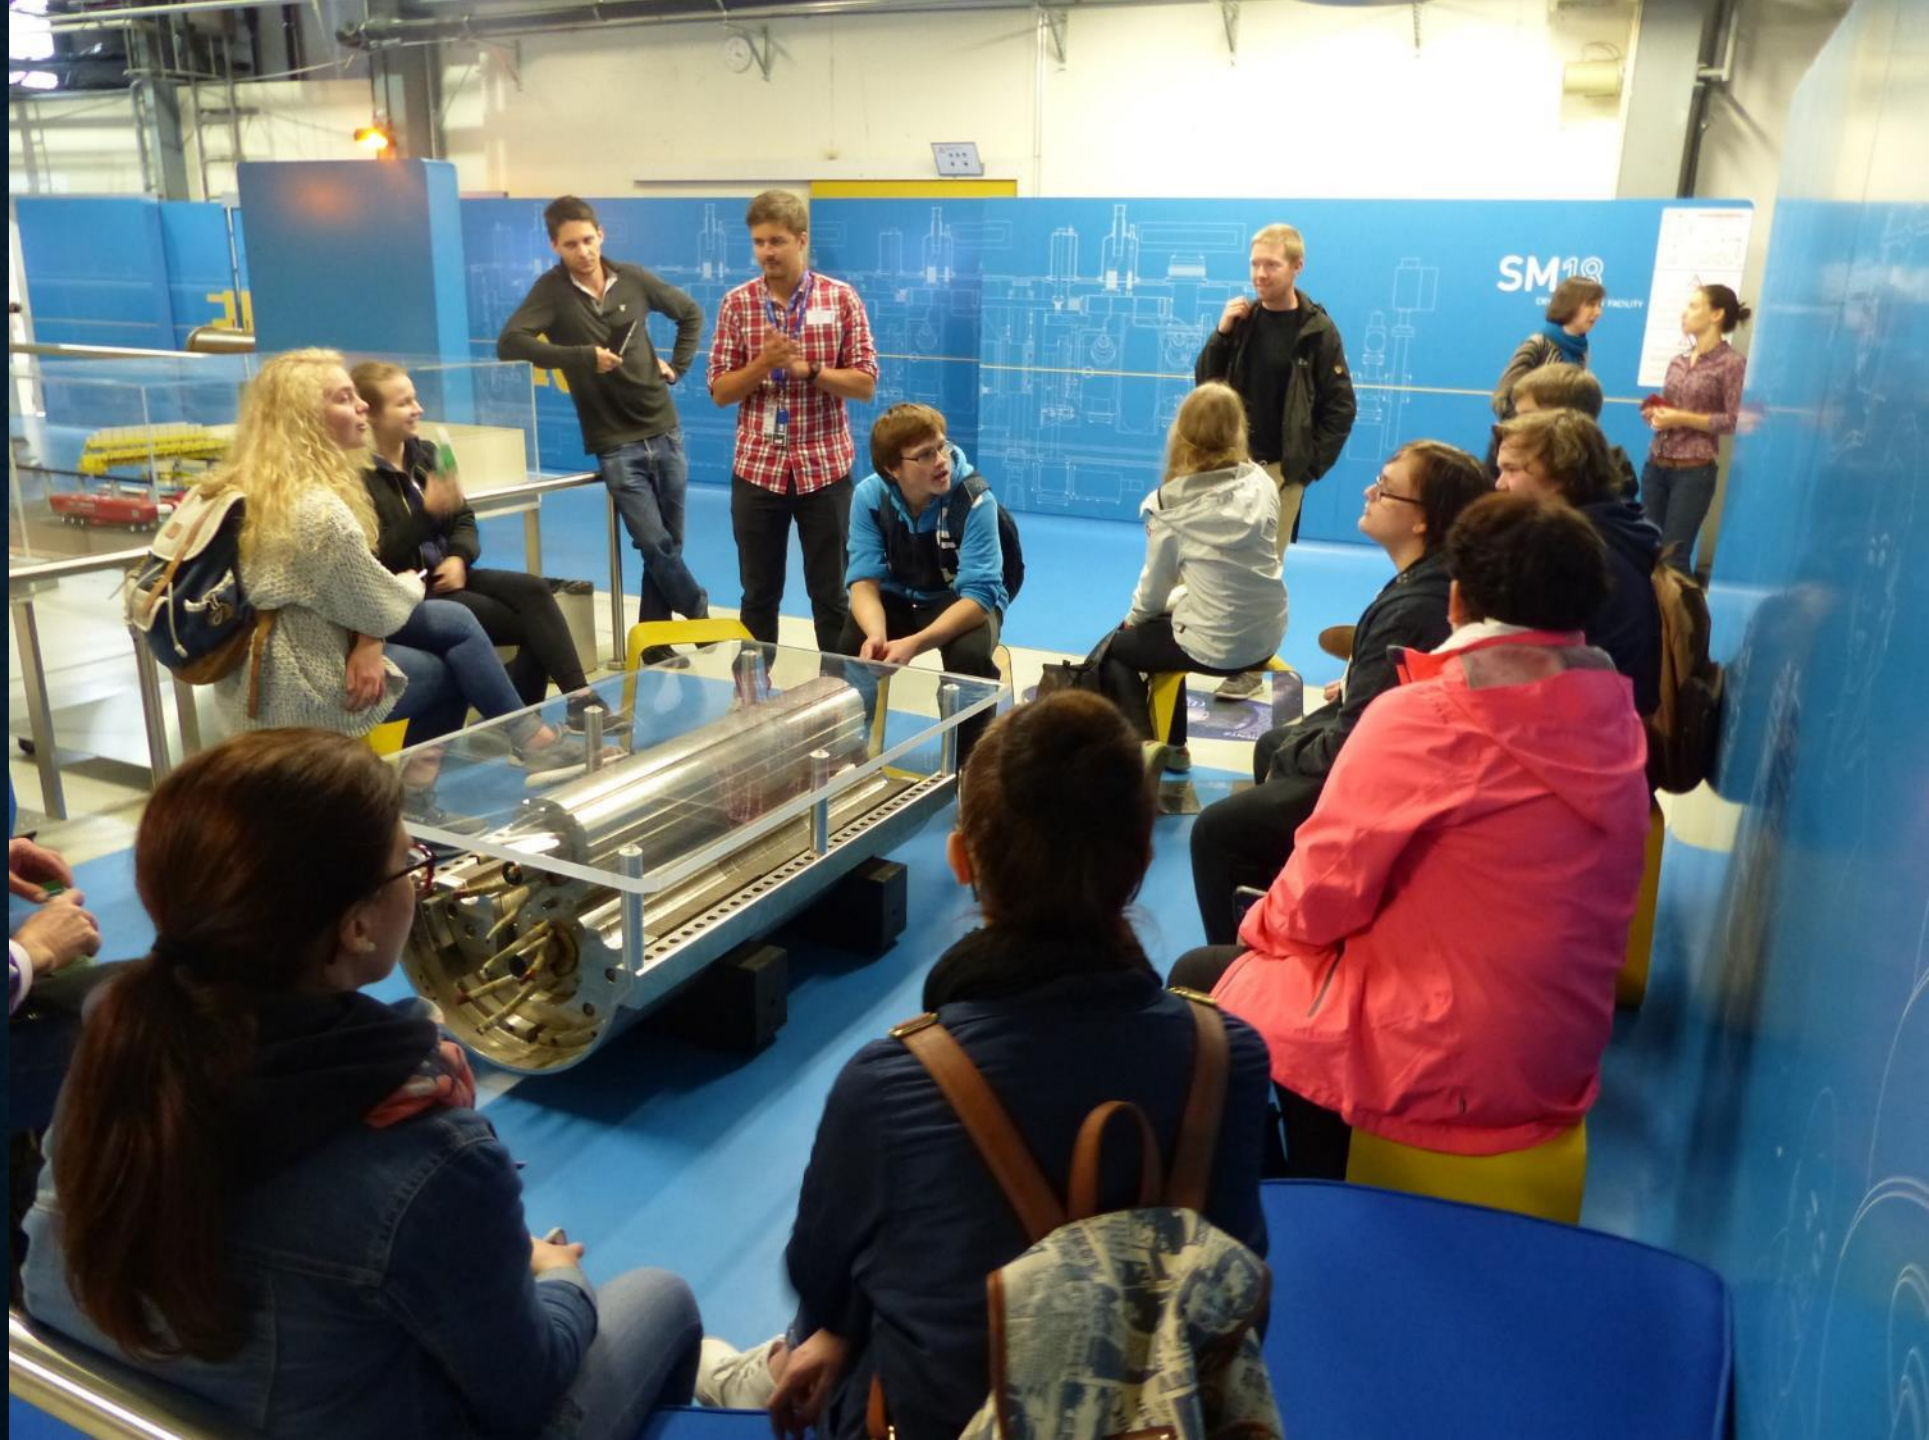







# Sightseeing in Geneva

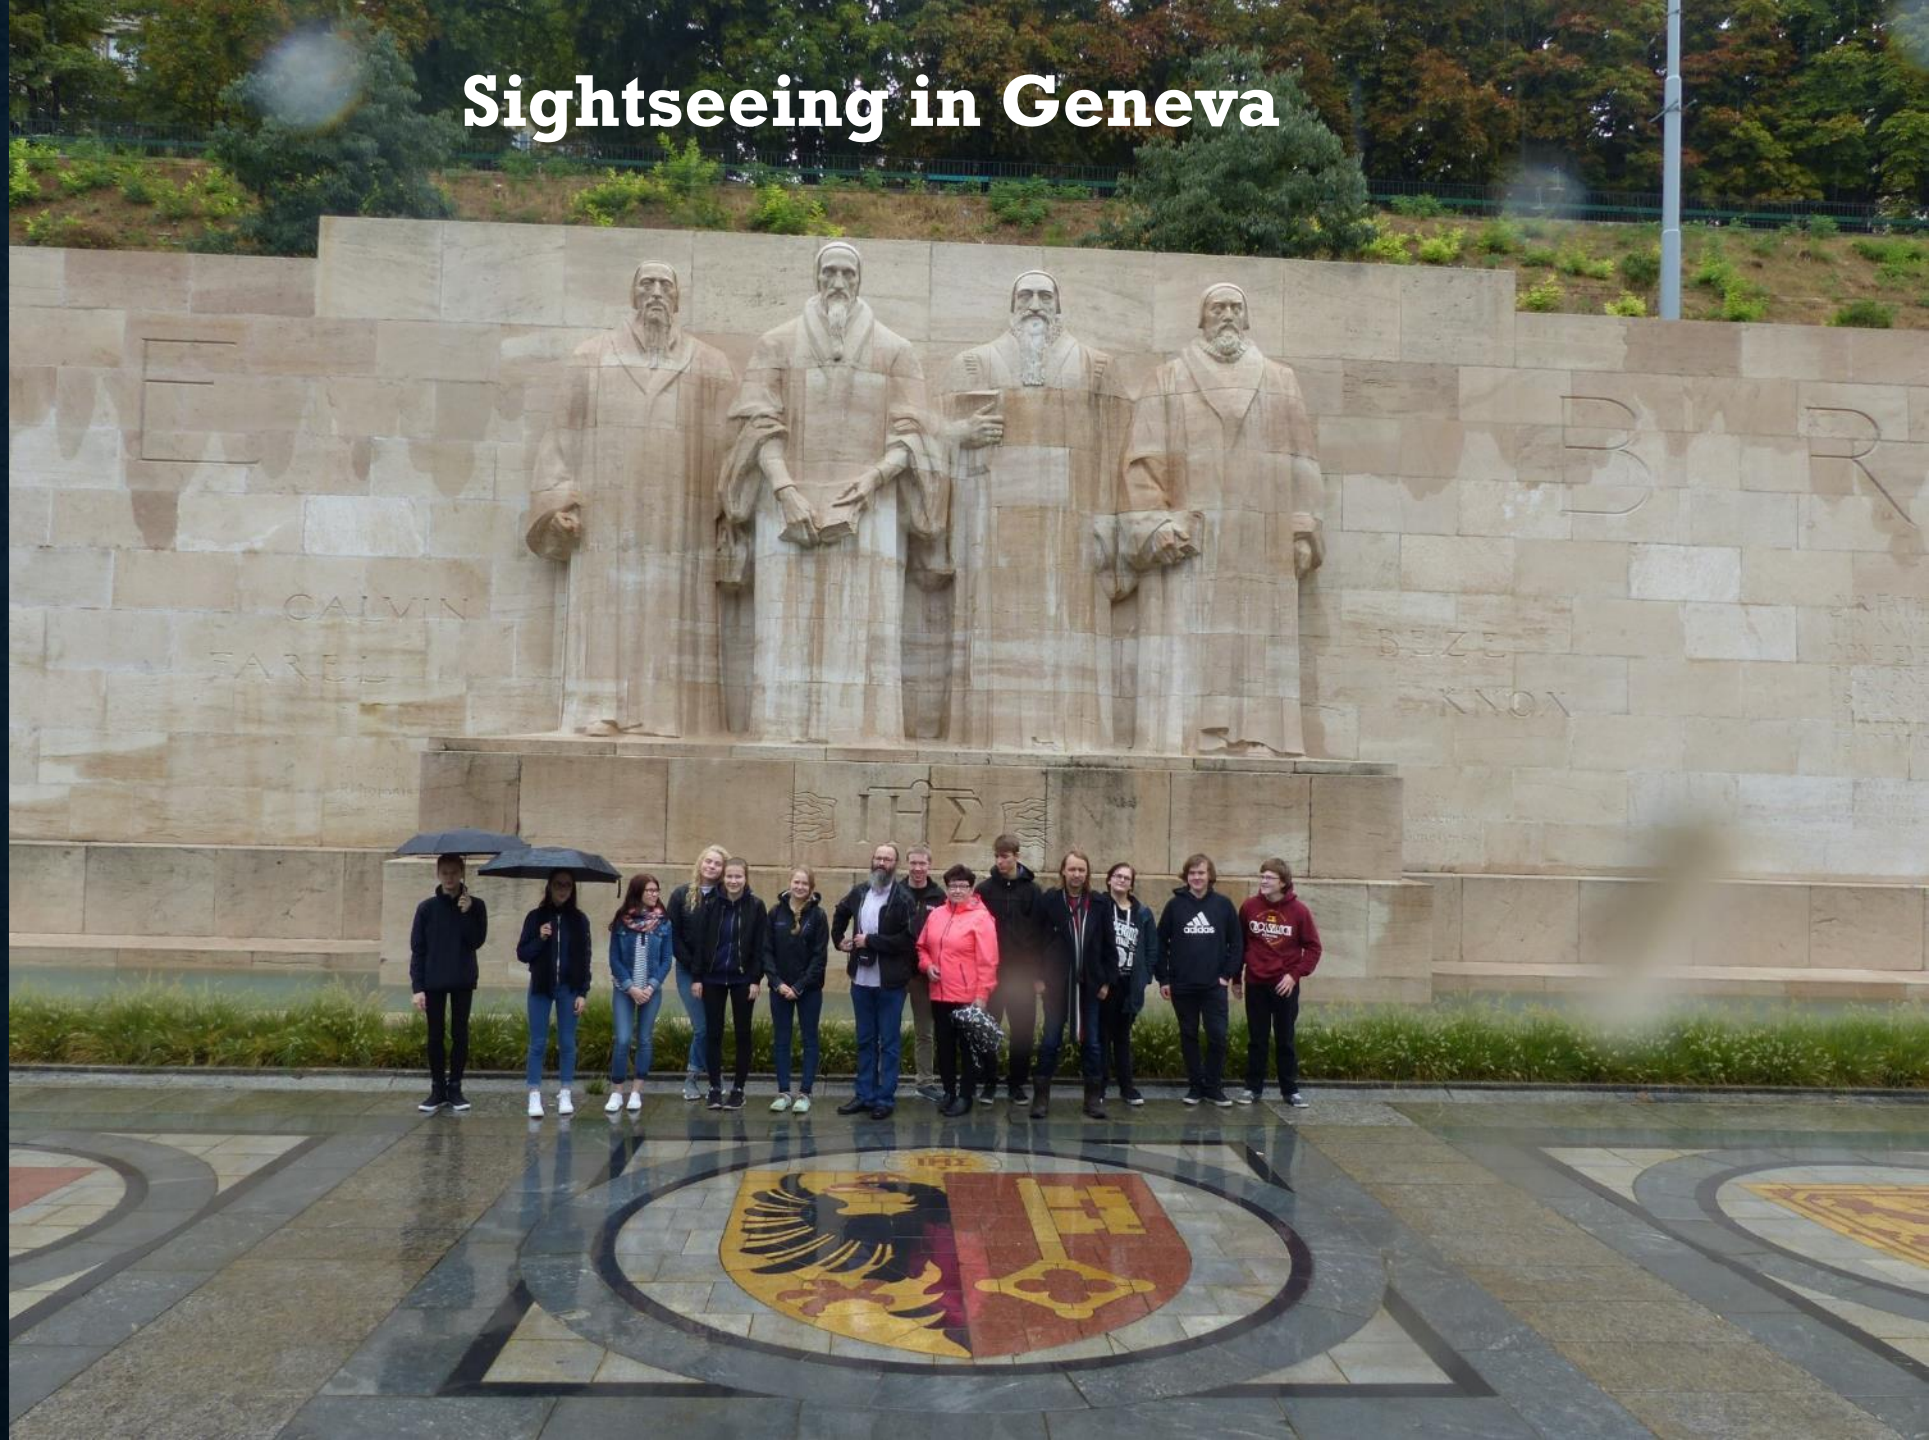



# Visiting the ethnographic museum.

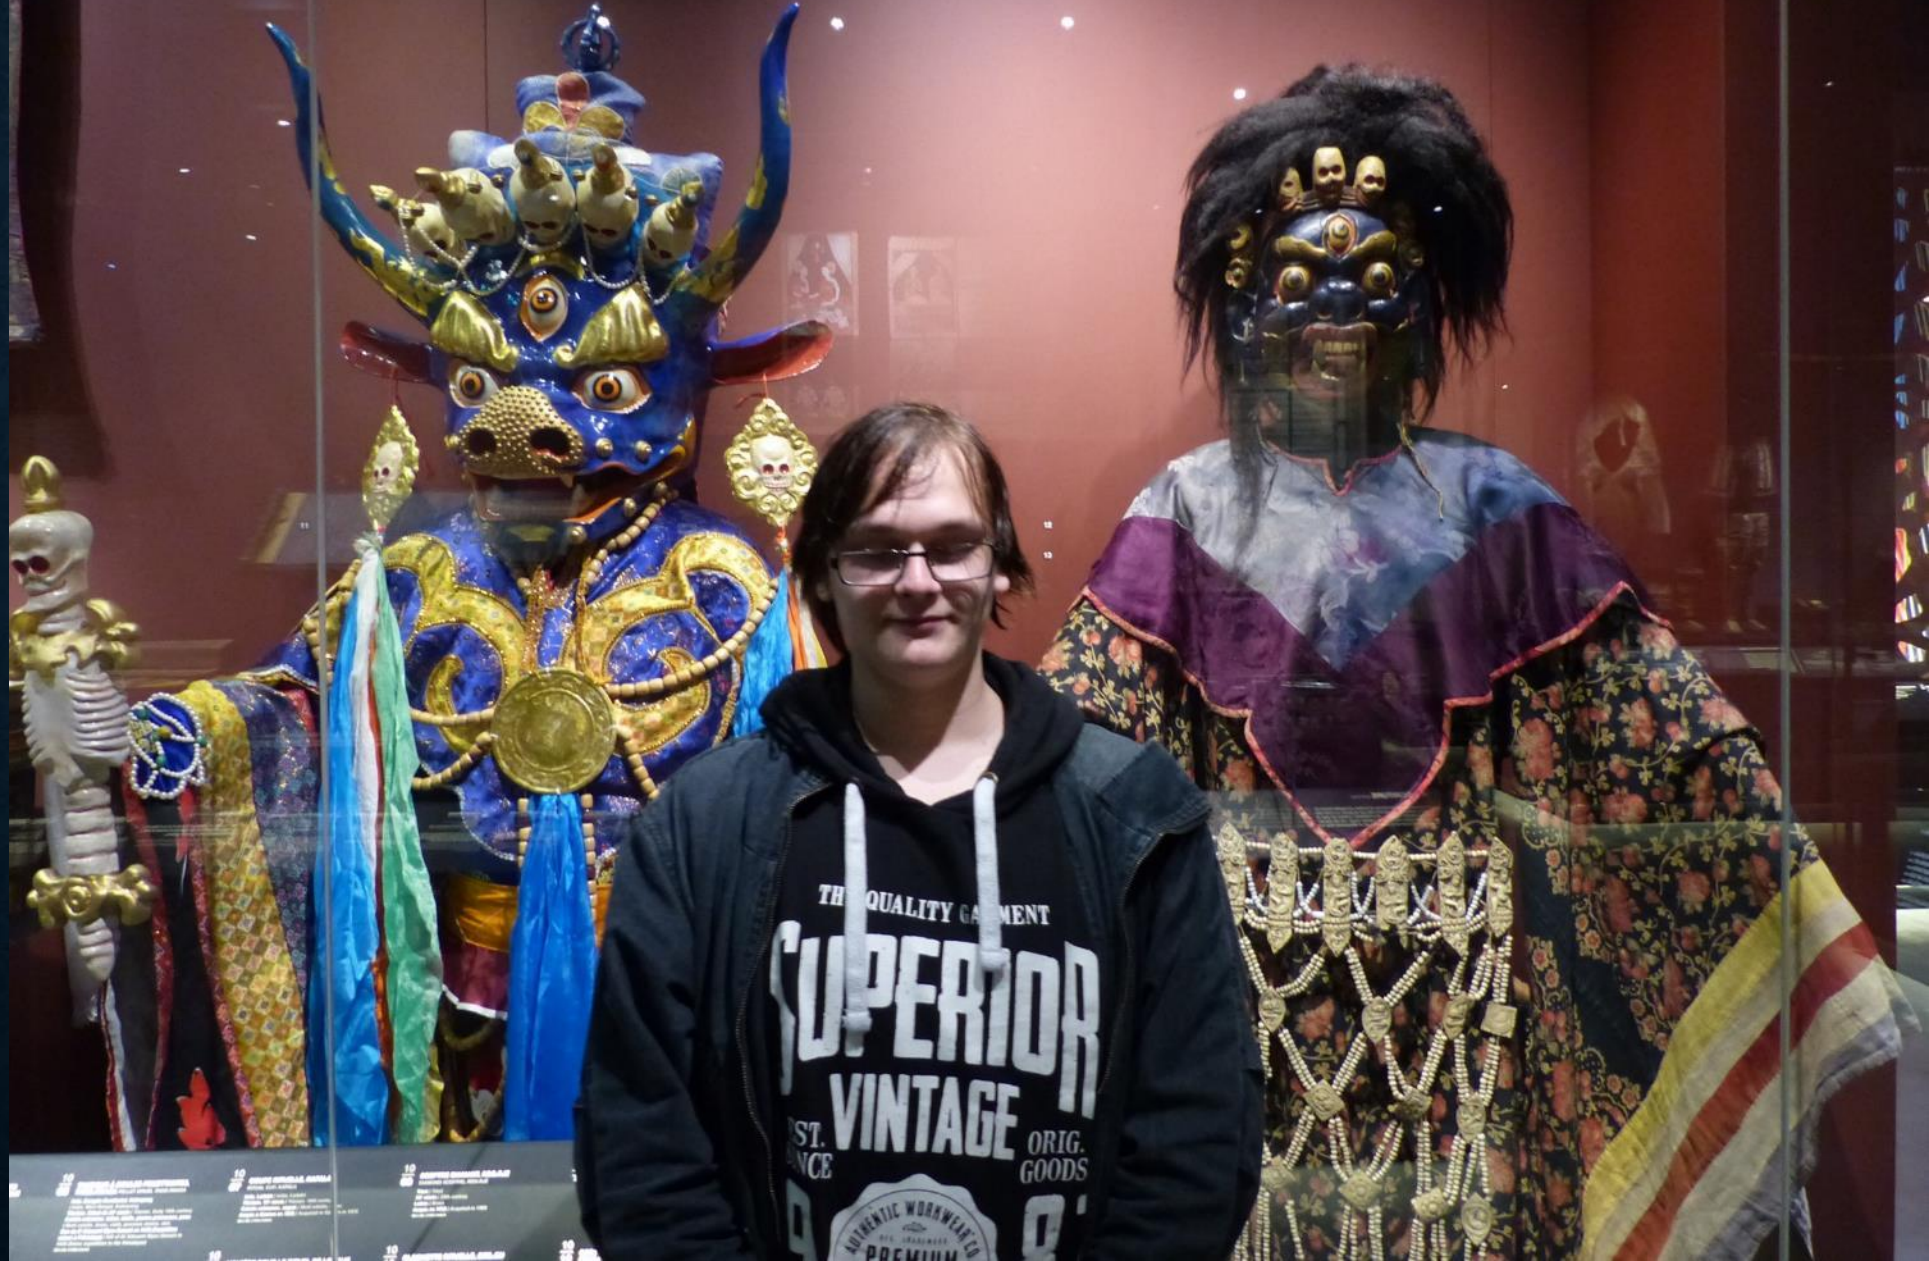



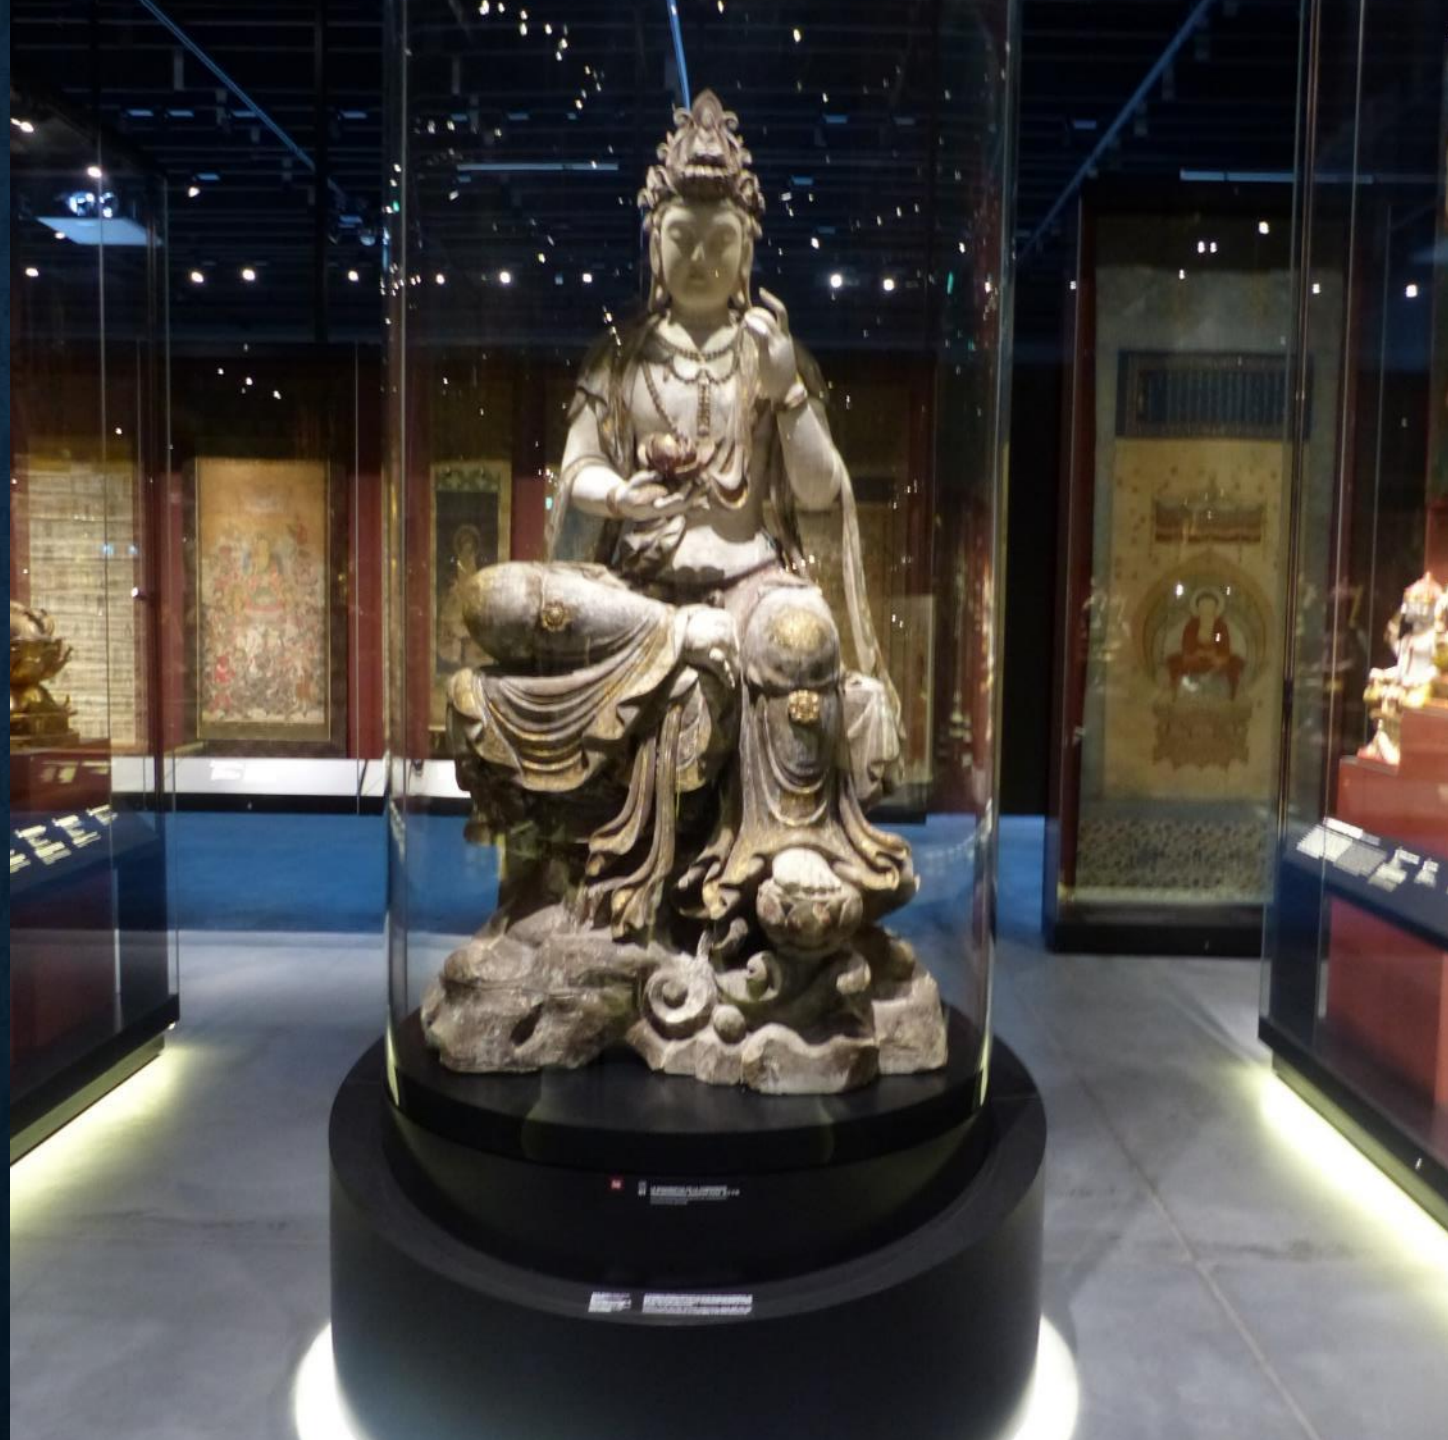



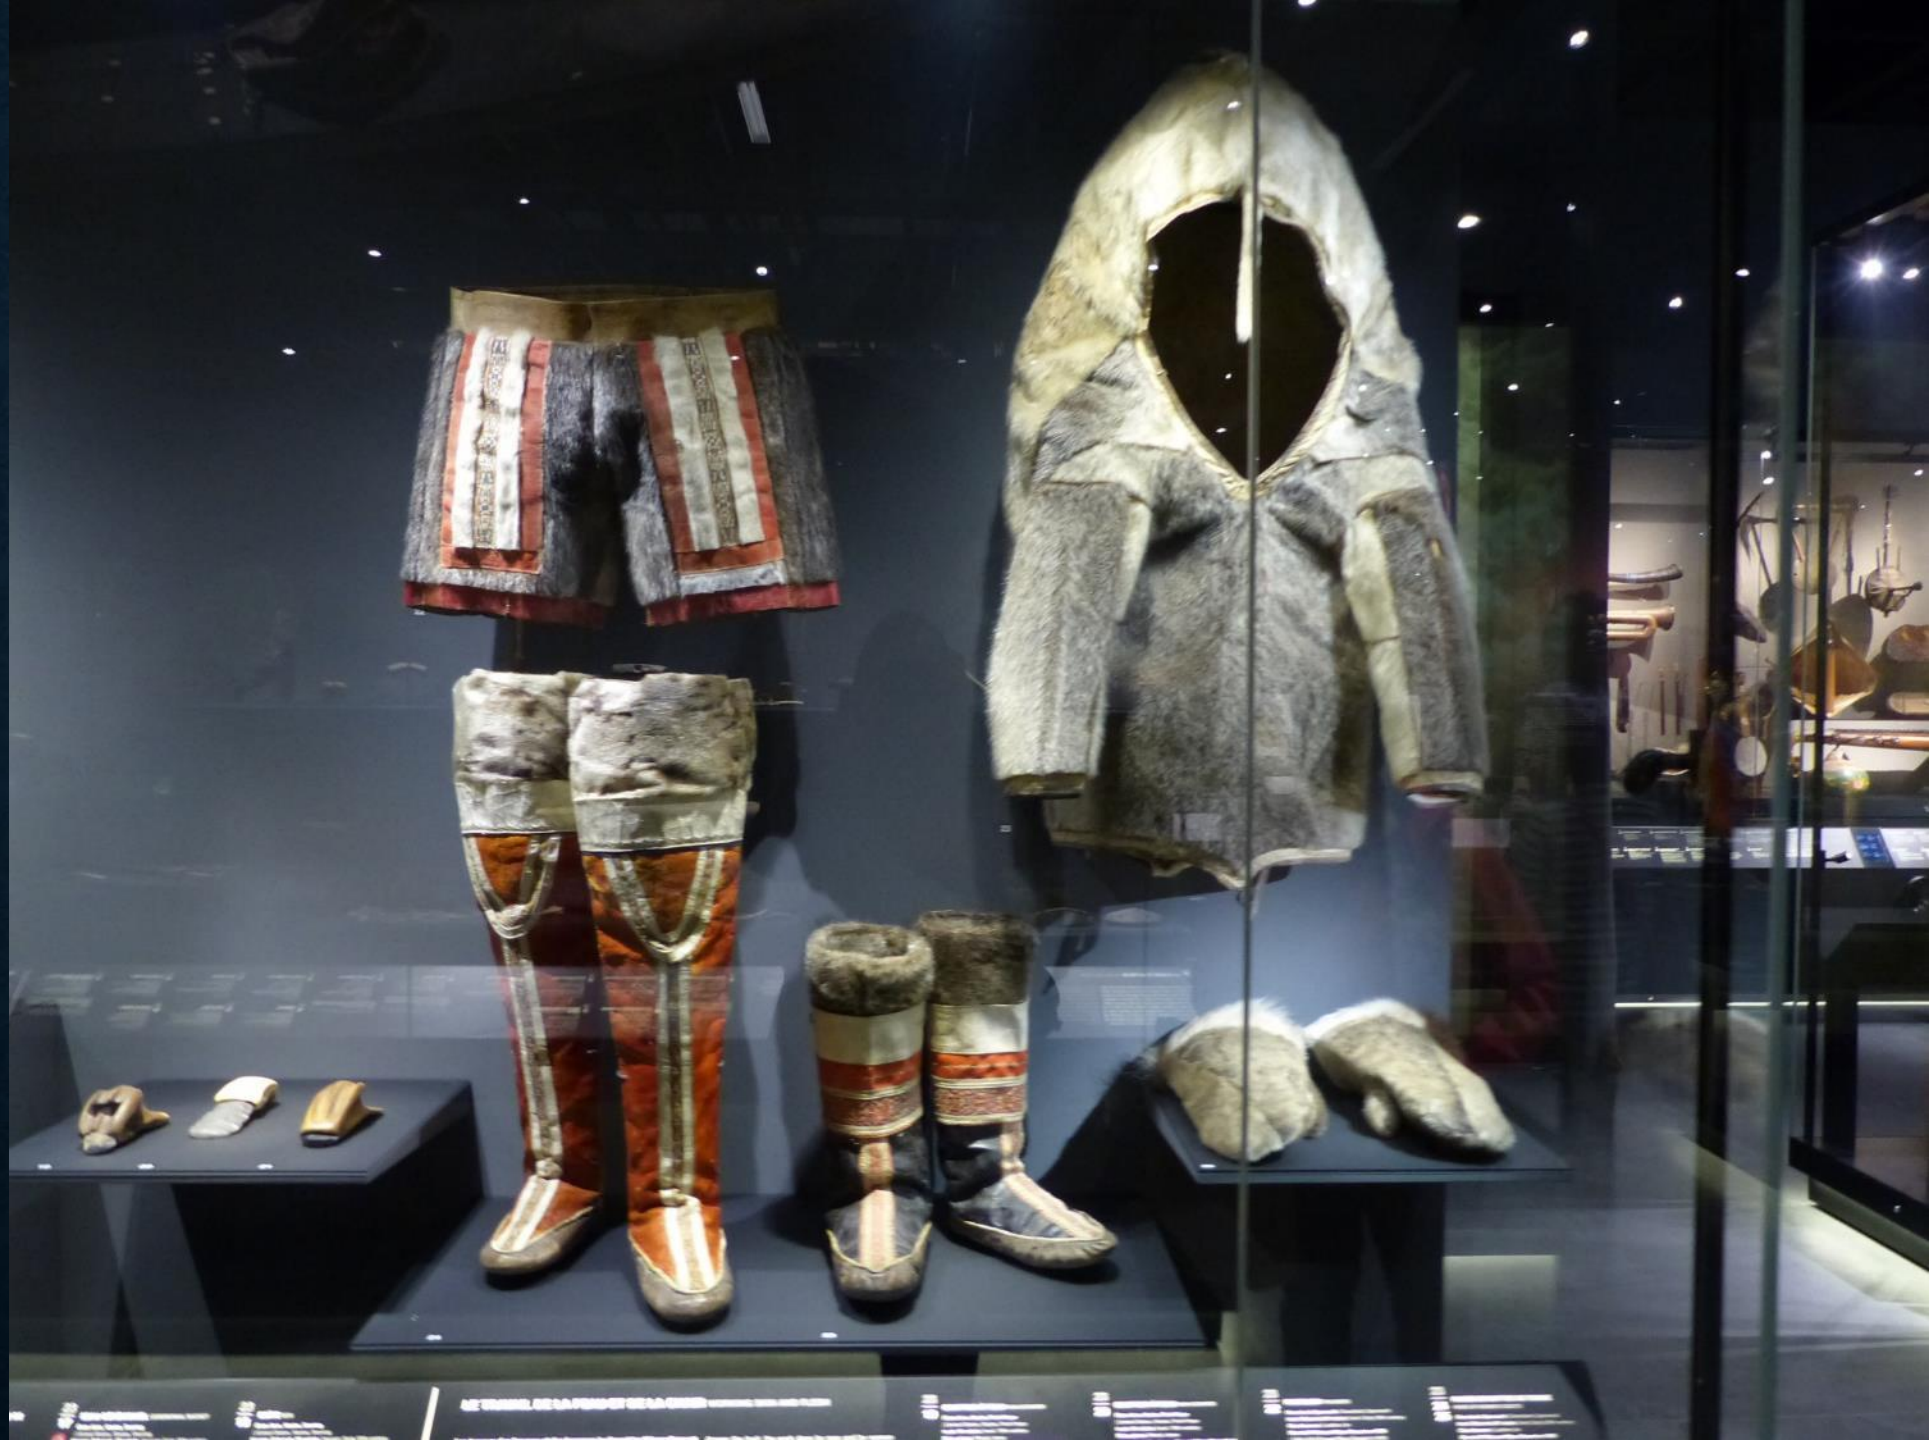



# Lunchbreak in Lausanne.

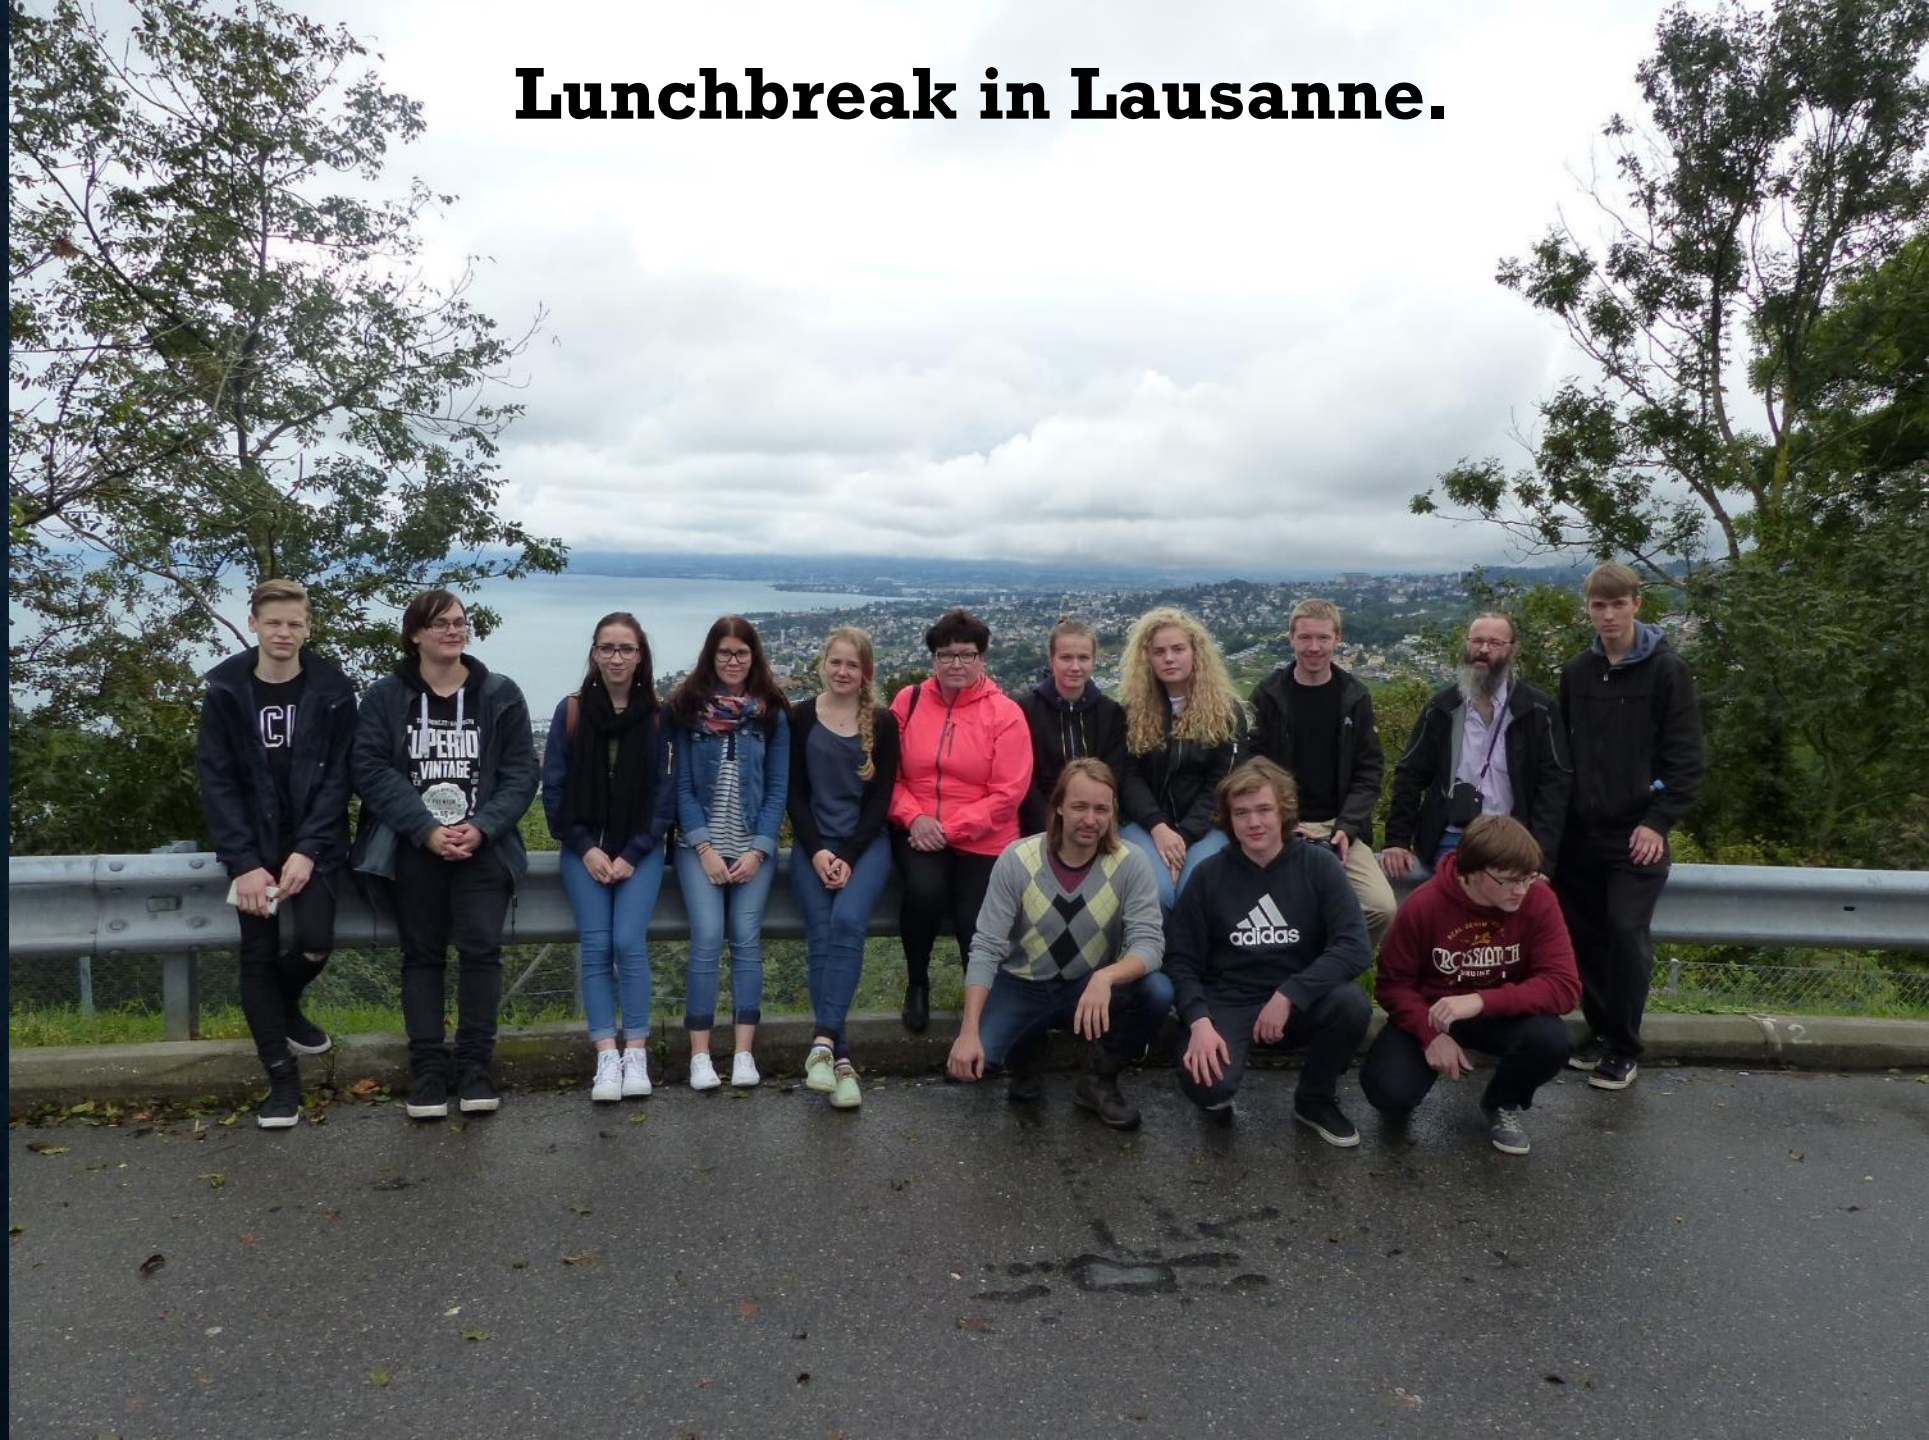



# Arriving at Verbania.

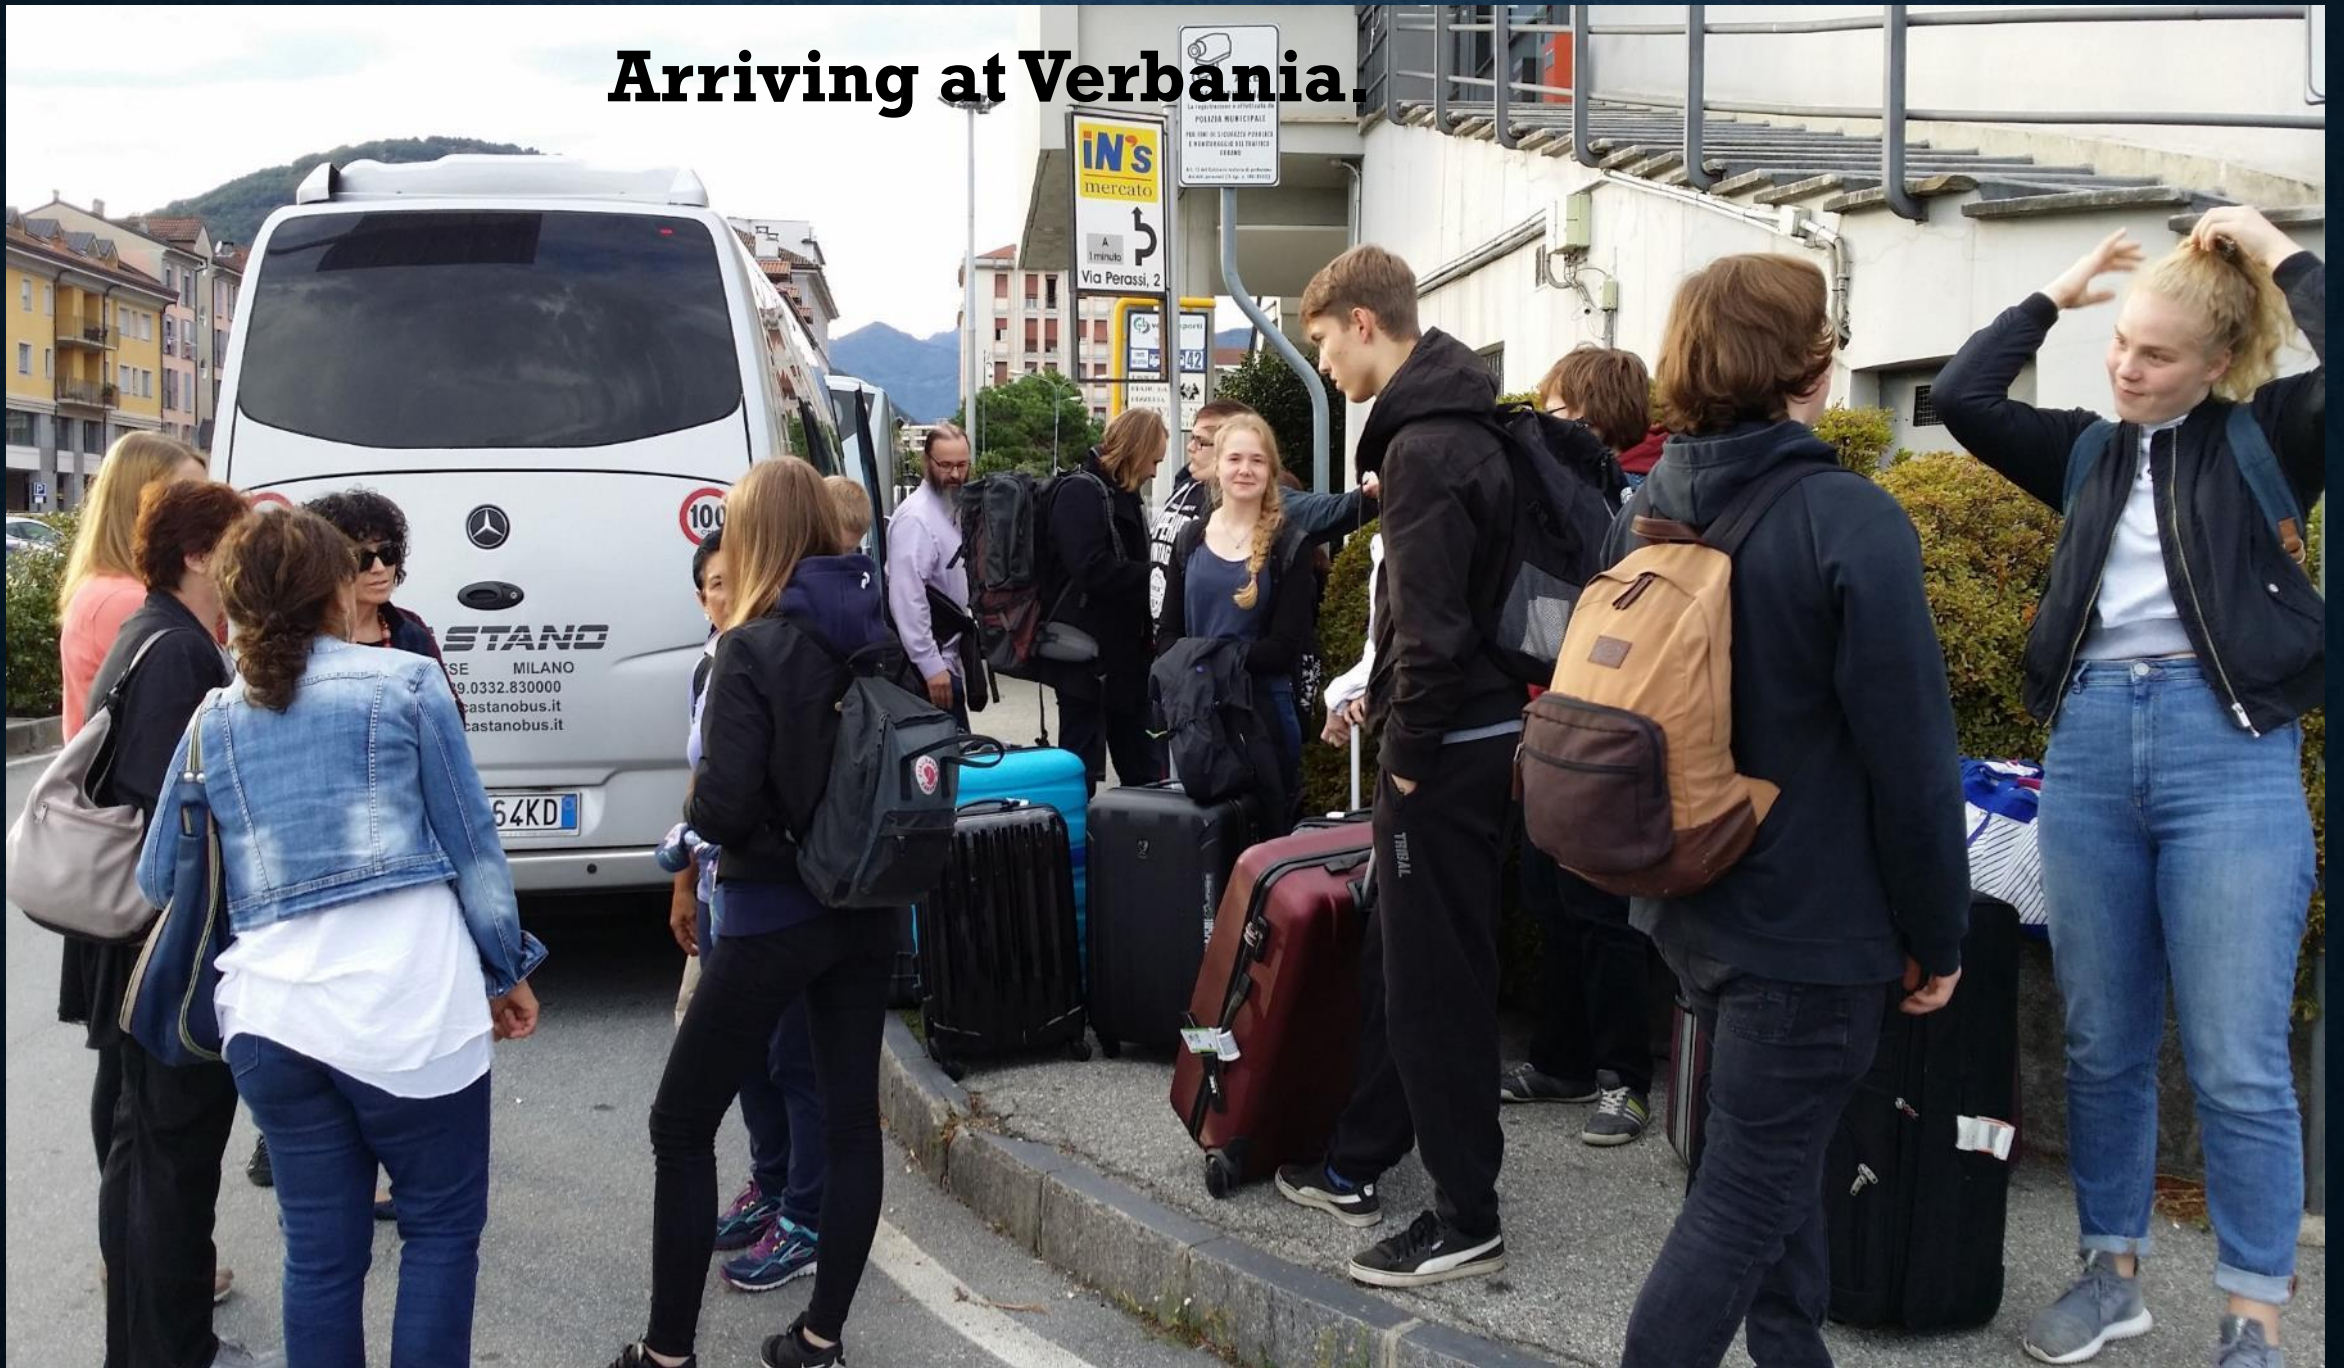



# Meeting the hostfamilies.

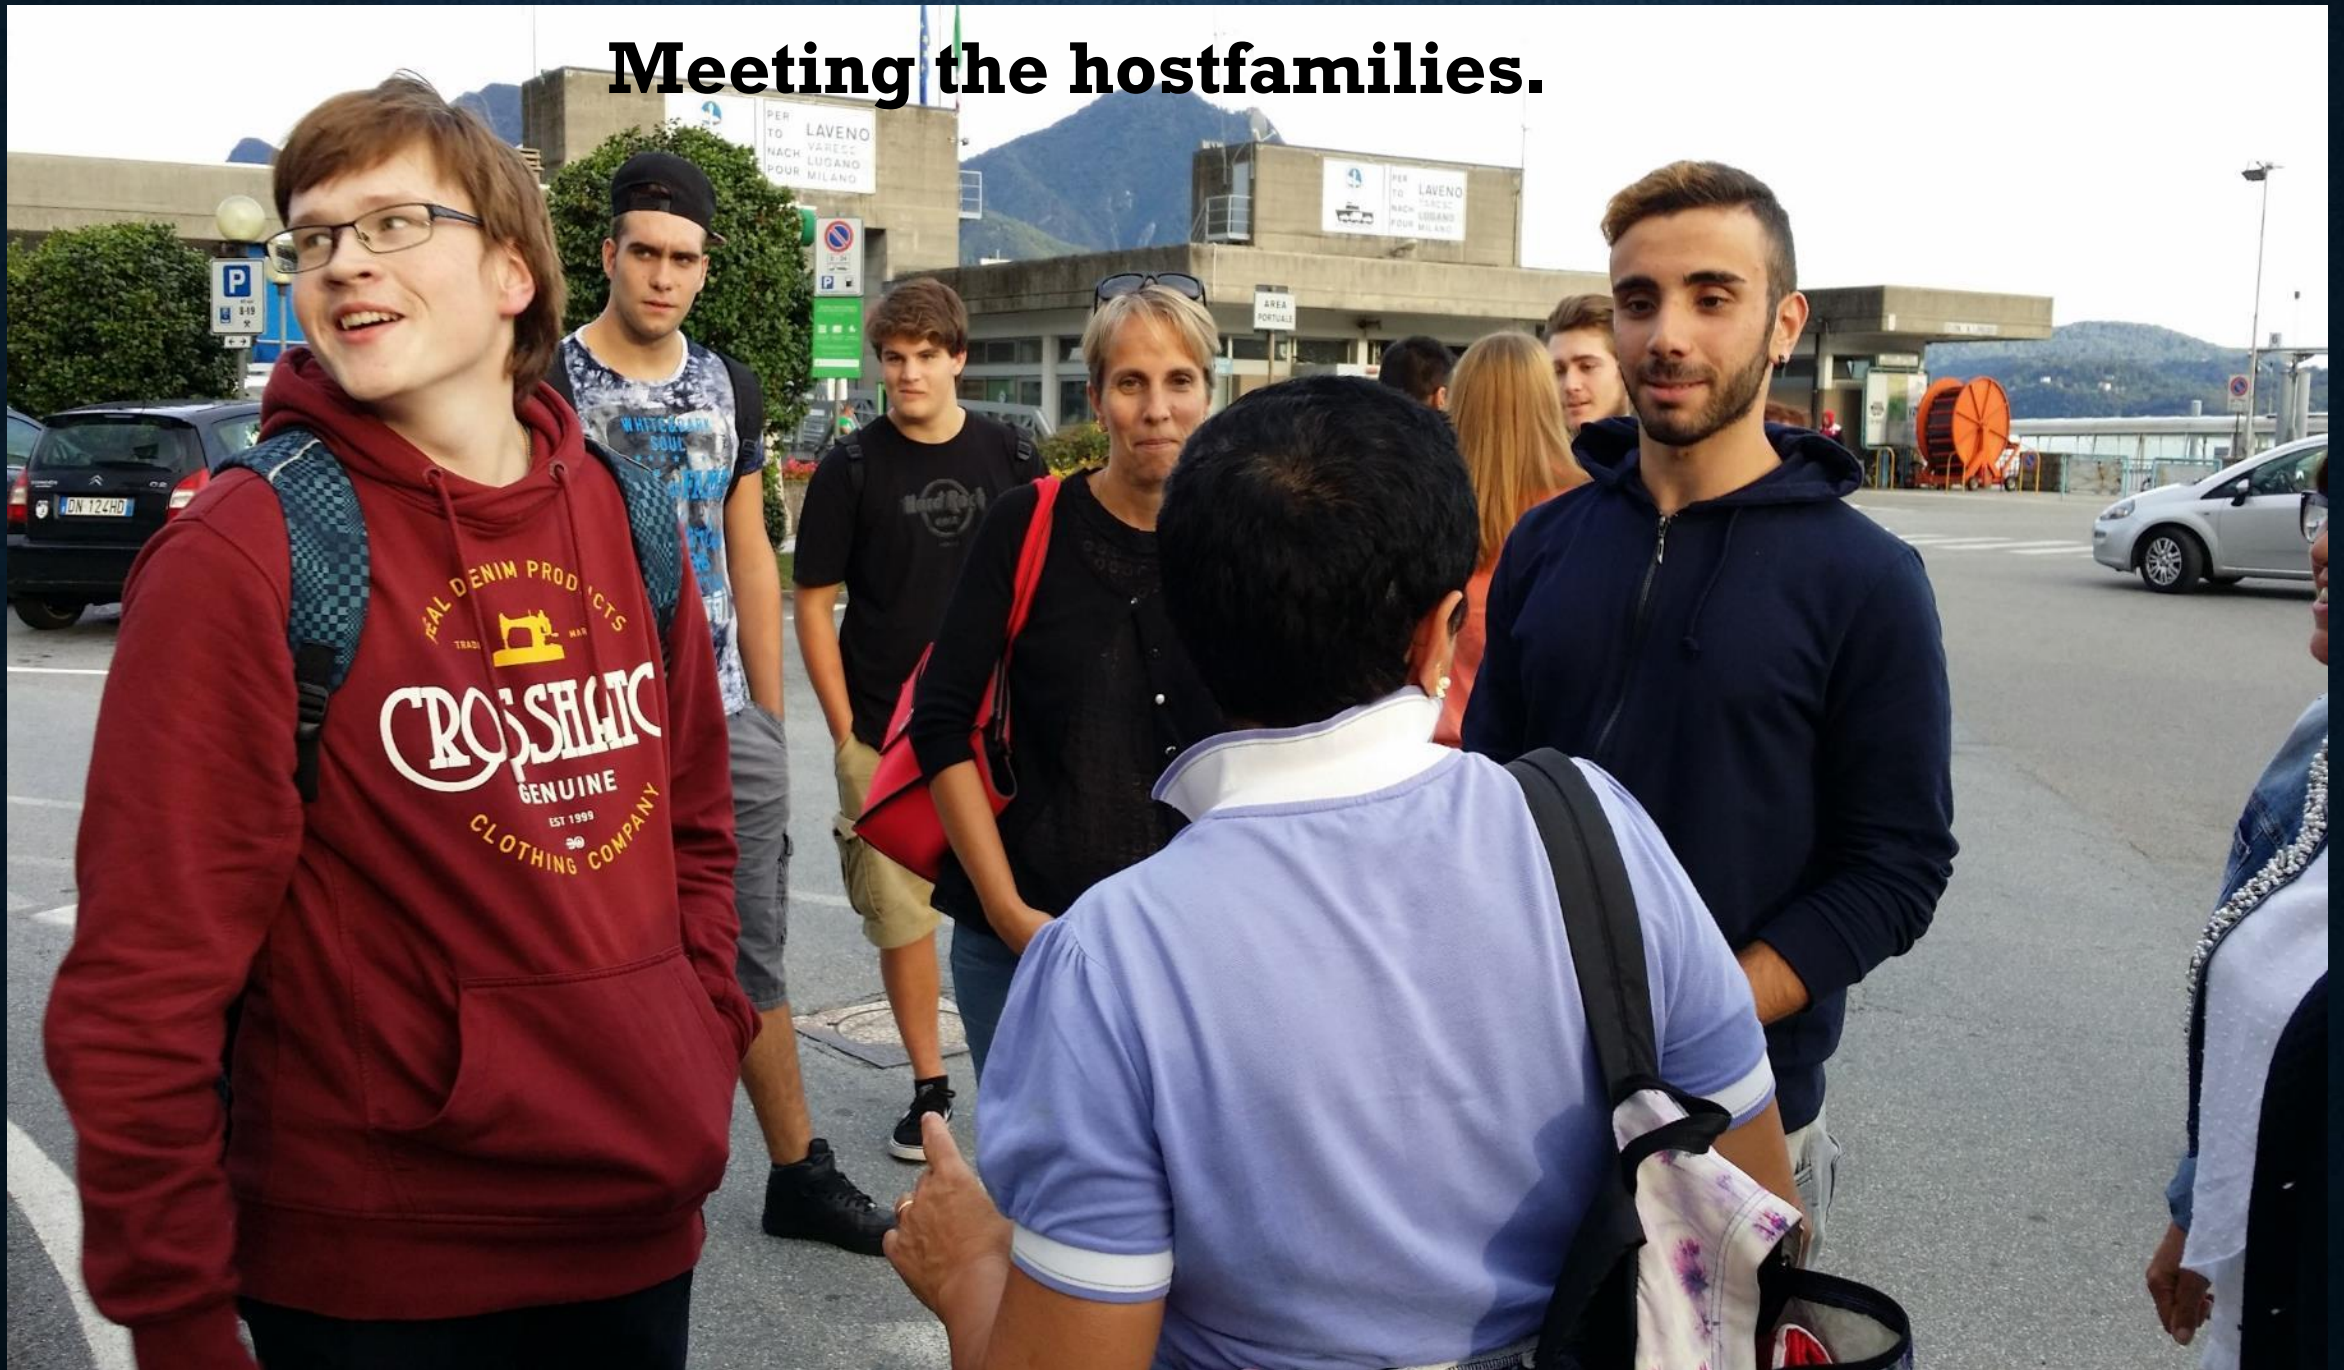



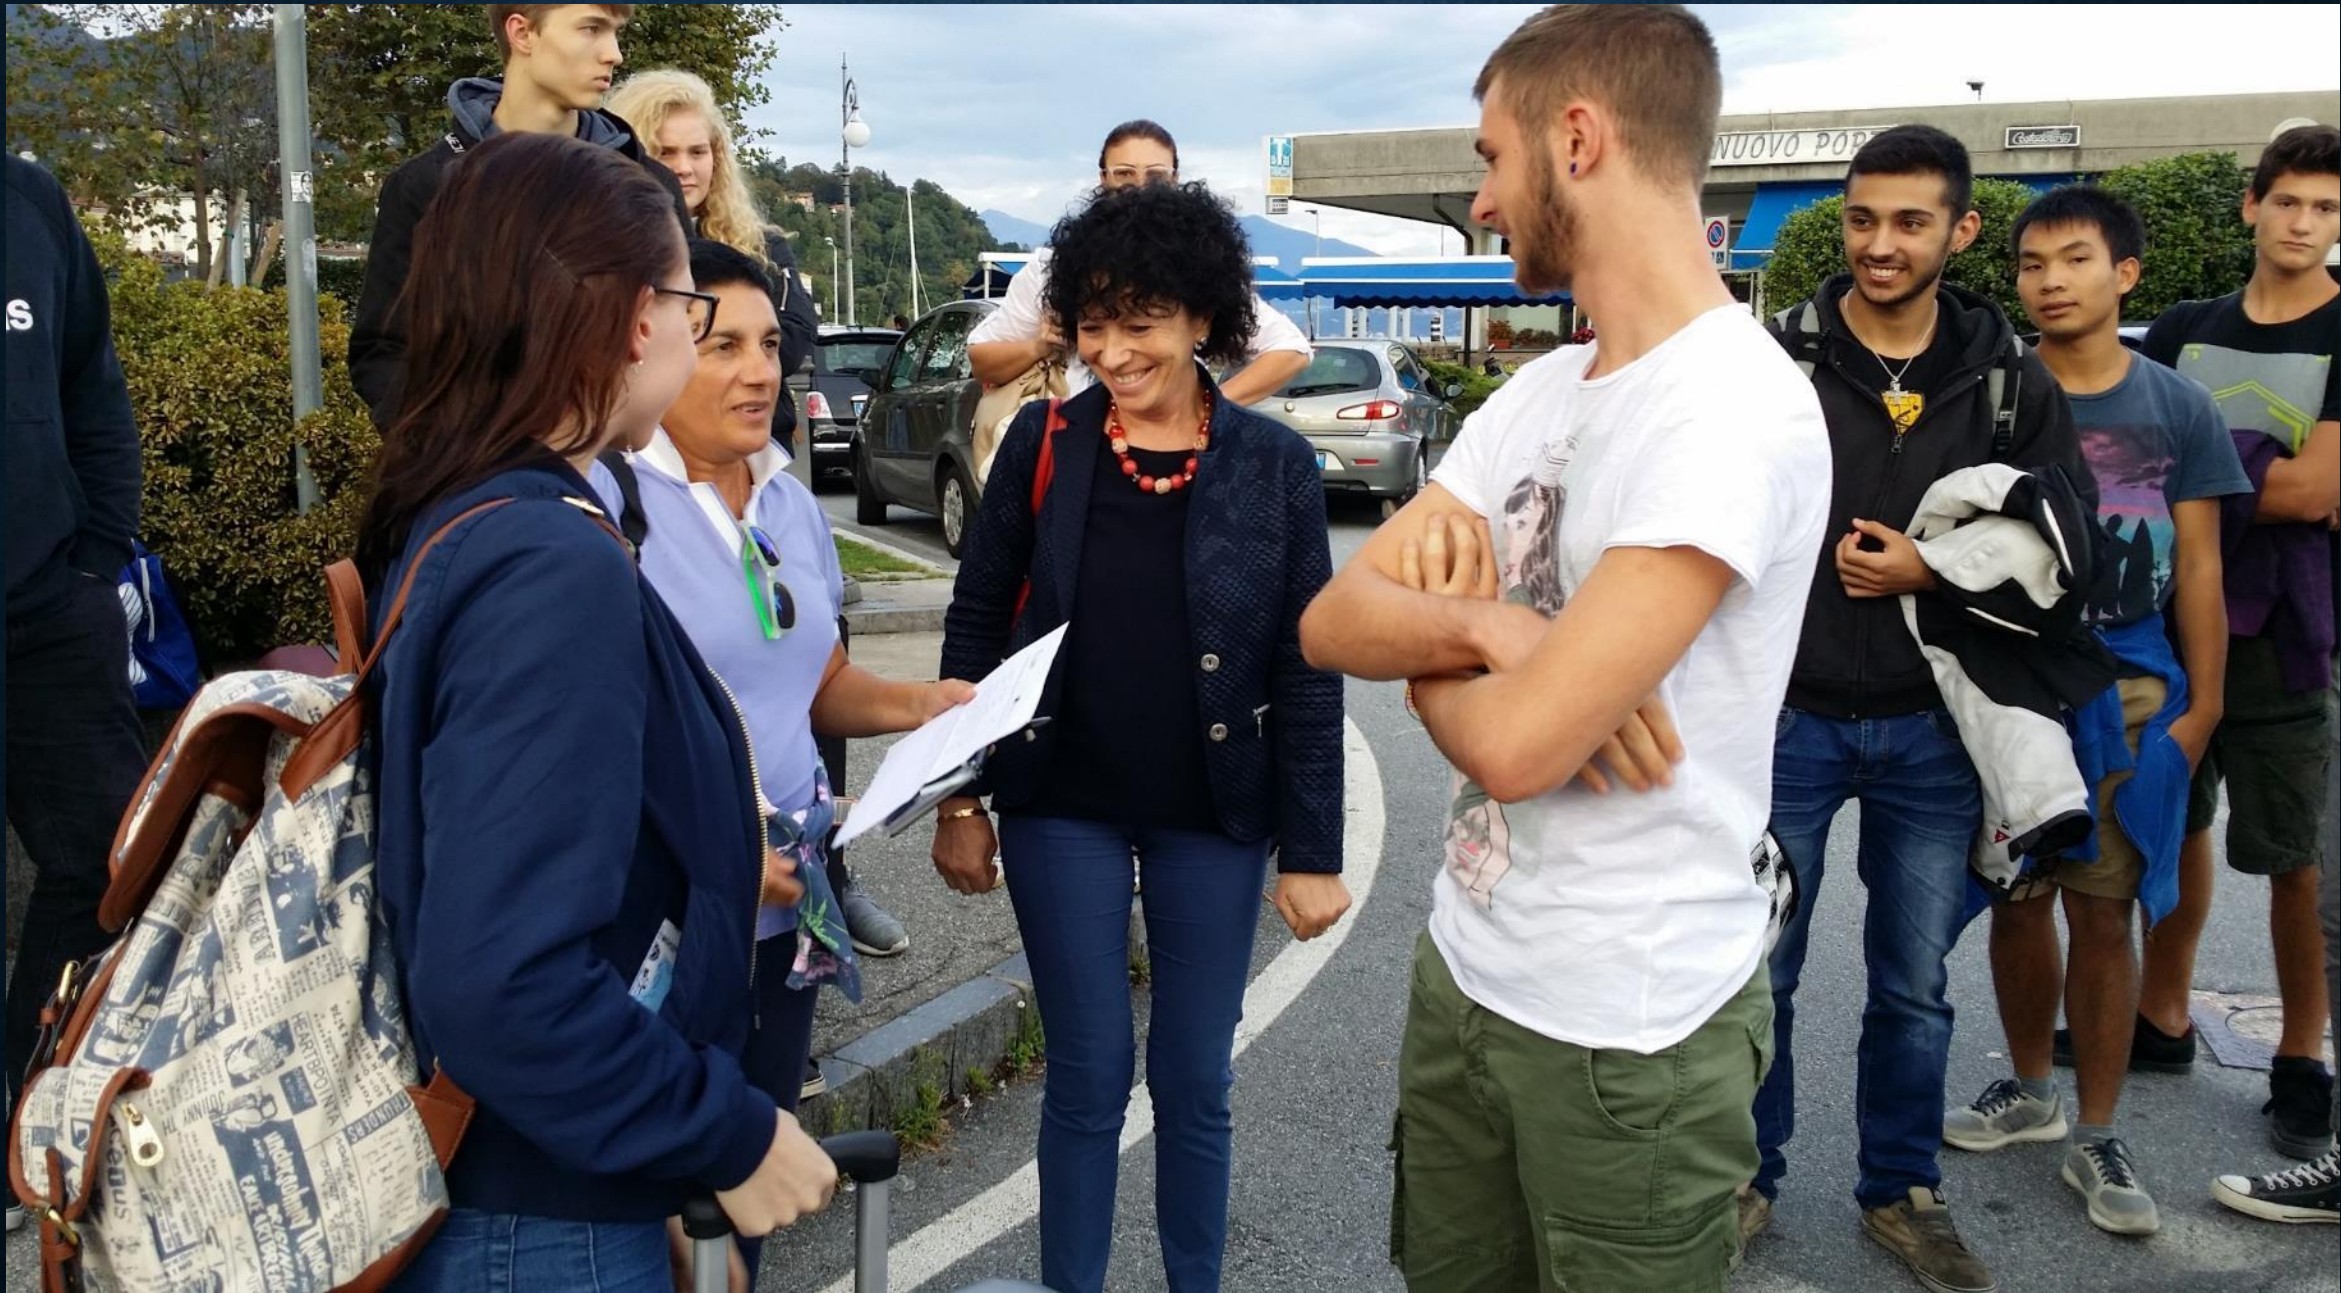



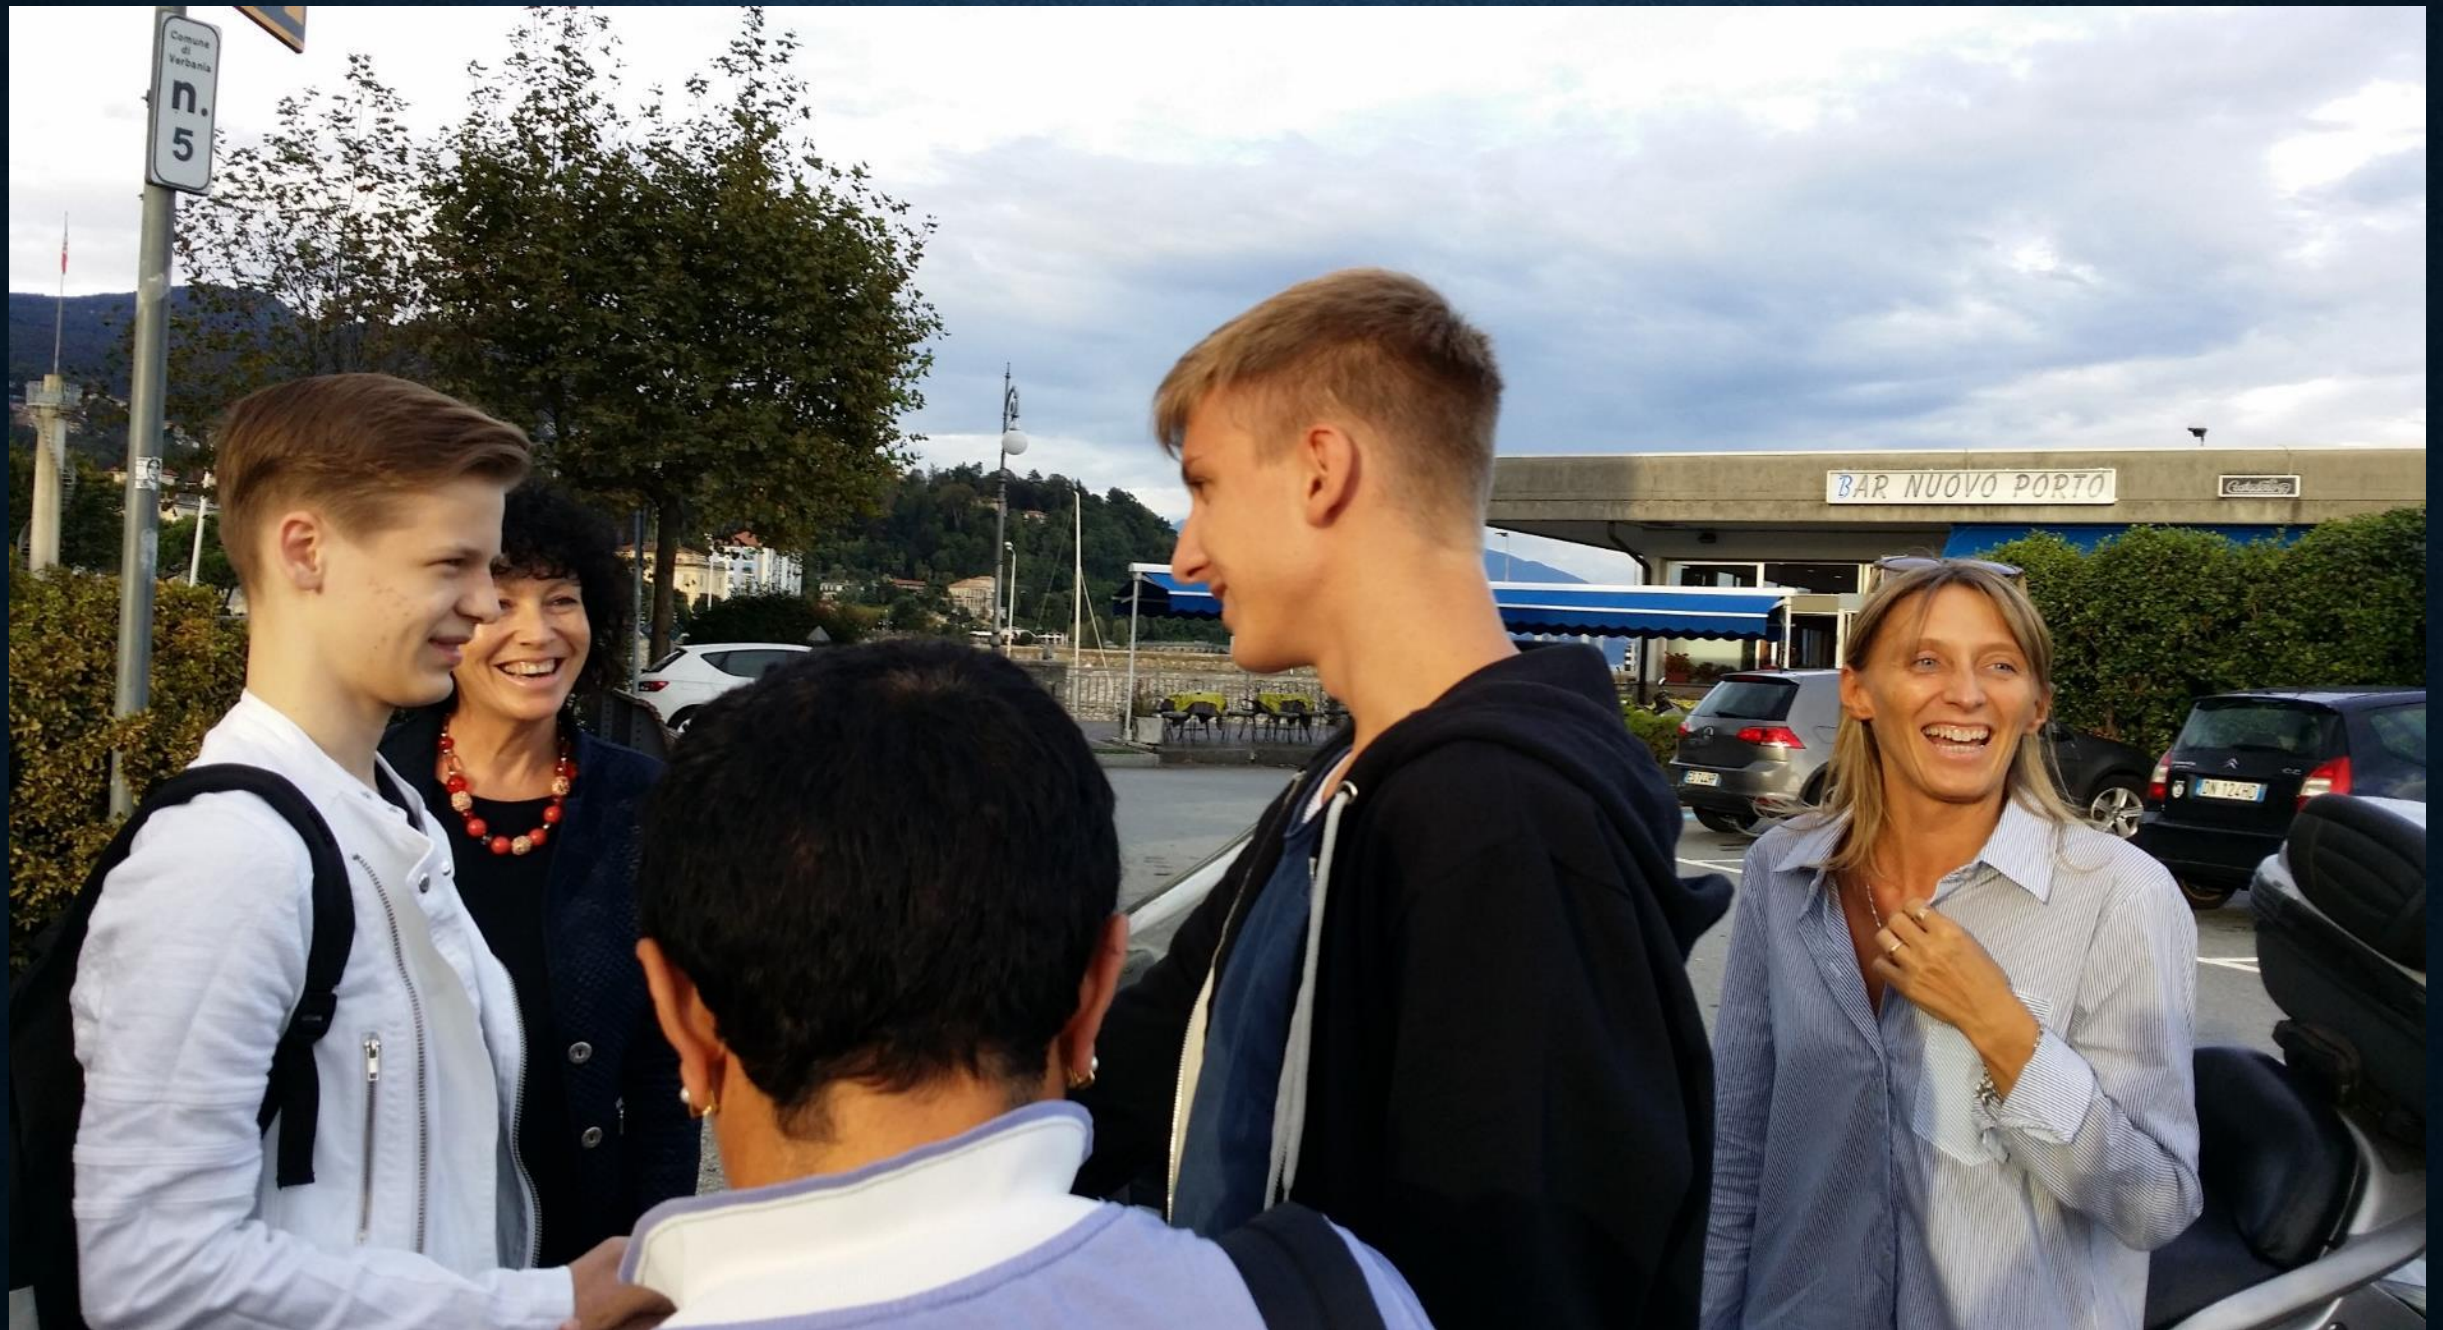



**Welcome to Verbania!**

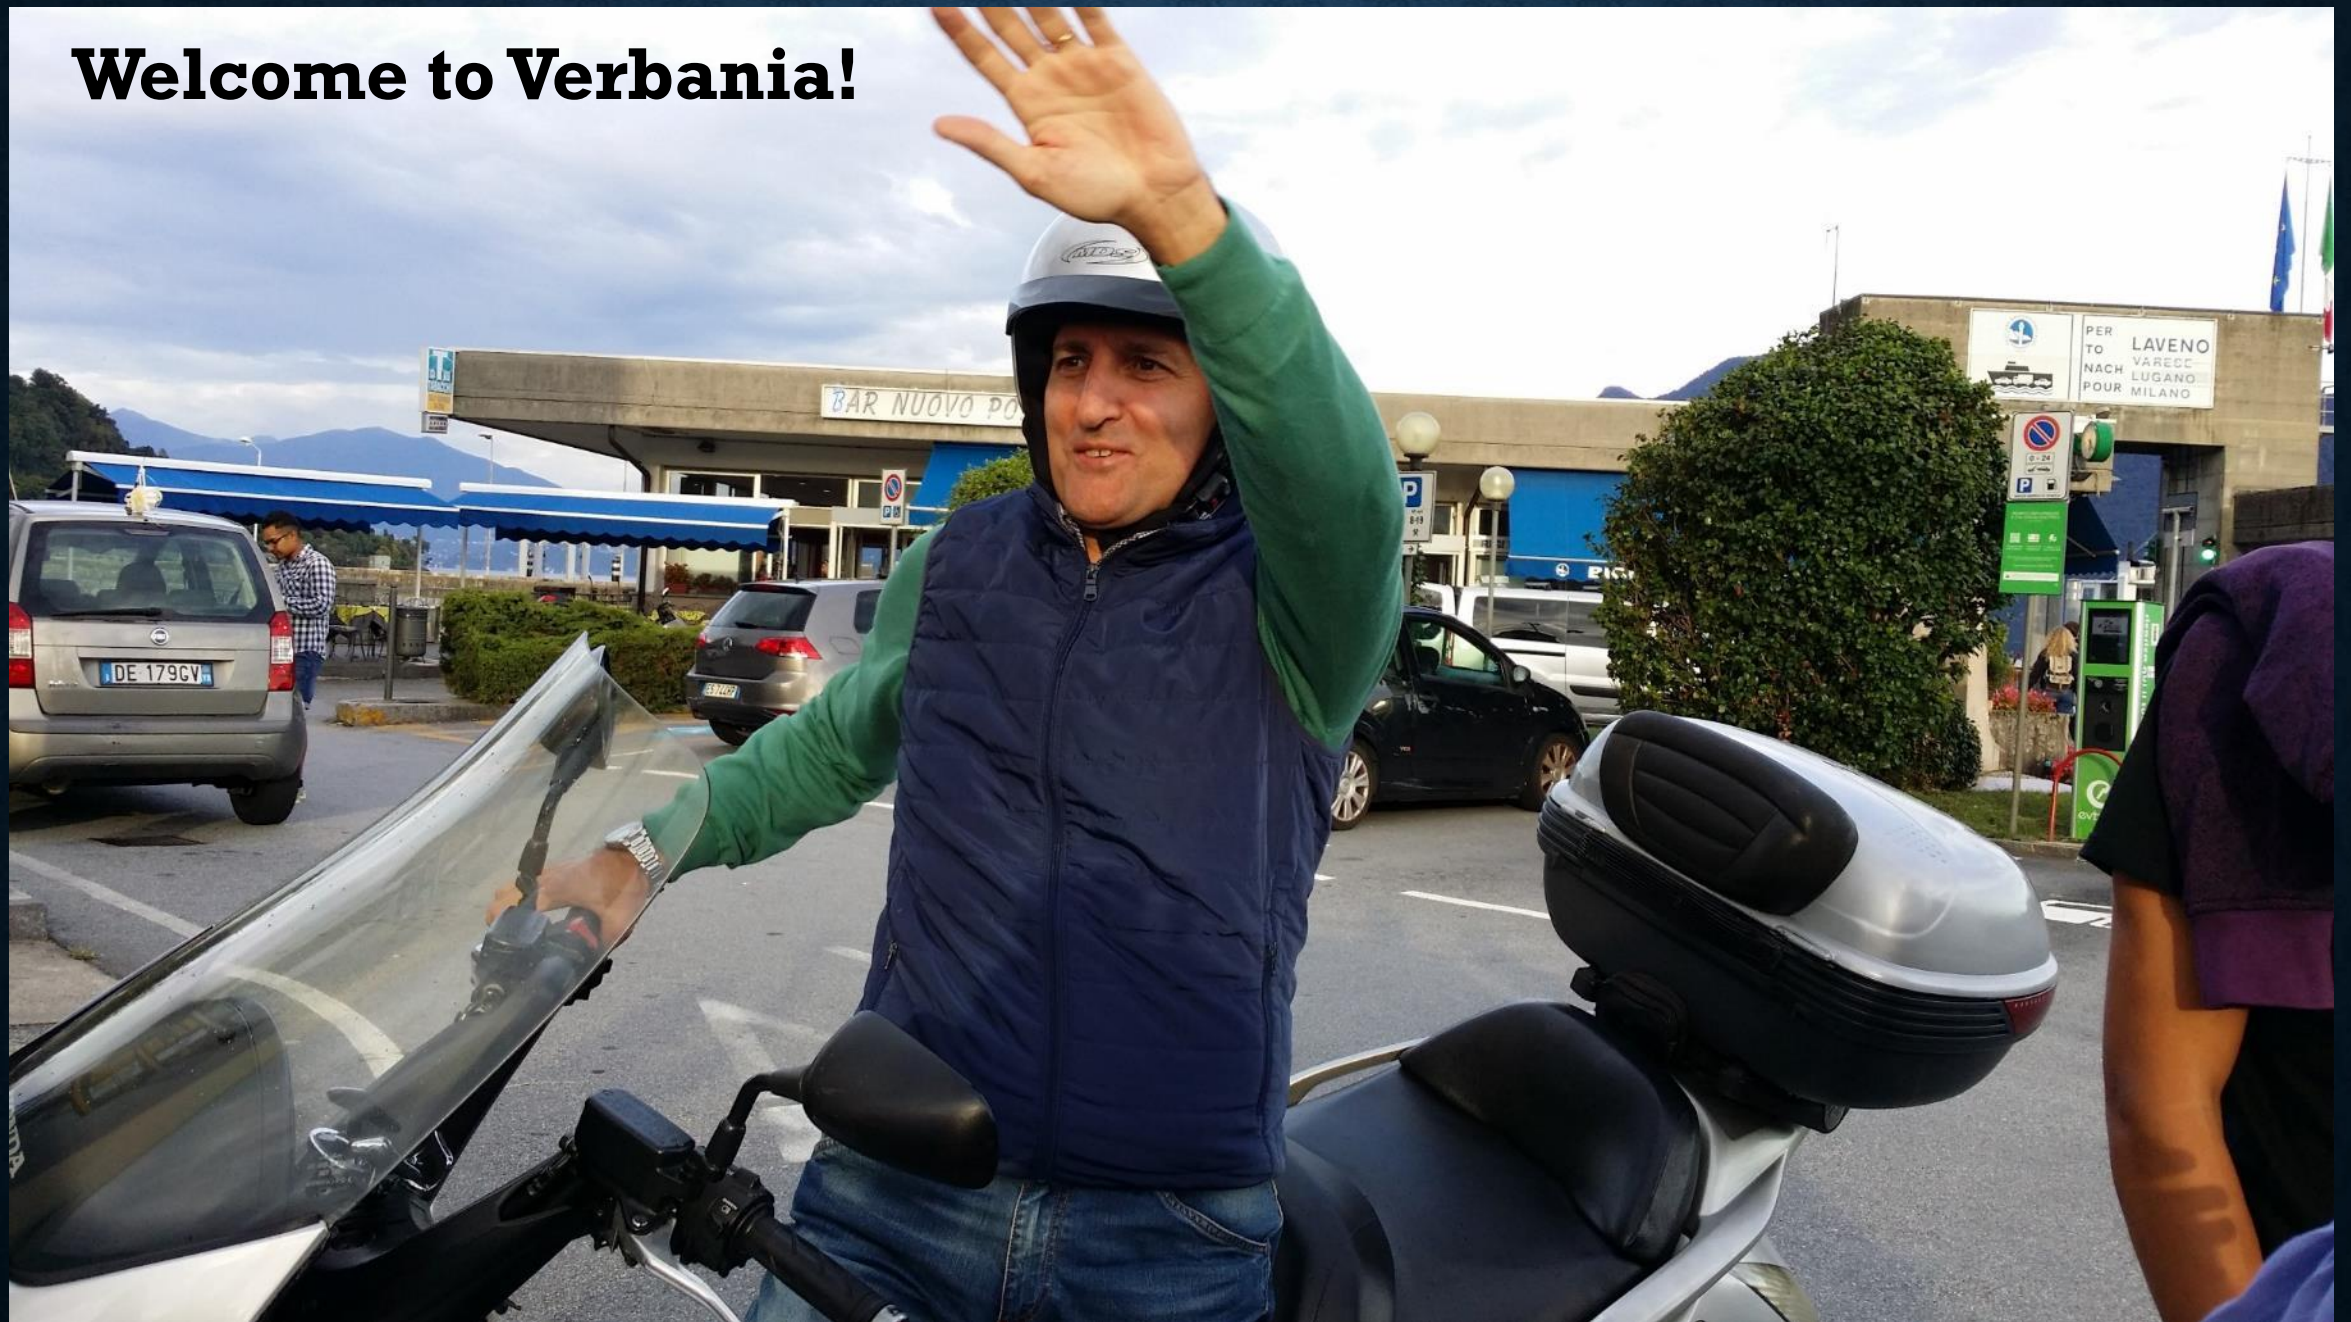



# **I.I.S. Lorenzo Cobianchi, our partner school**

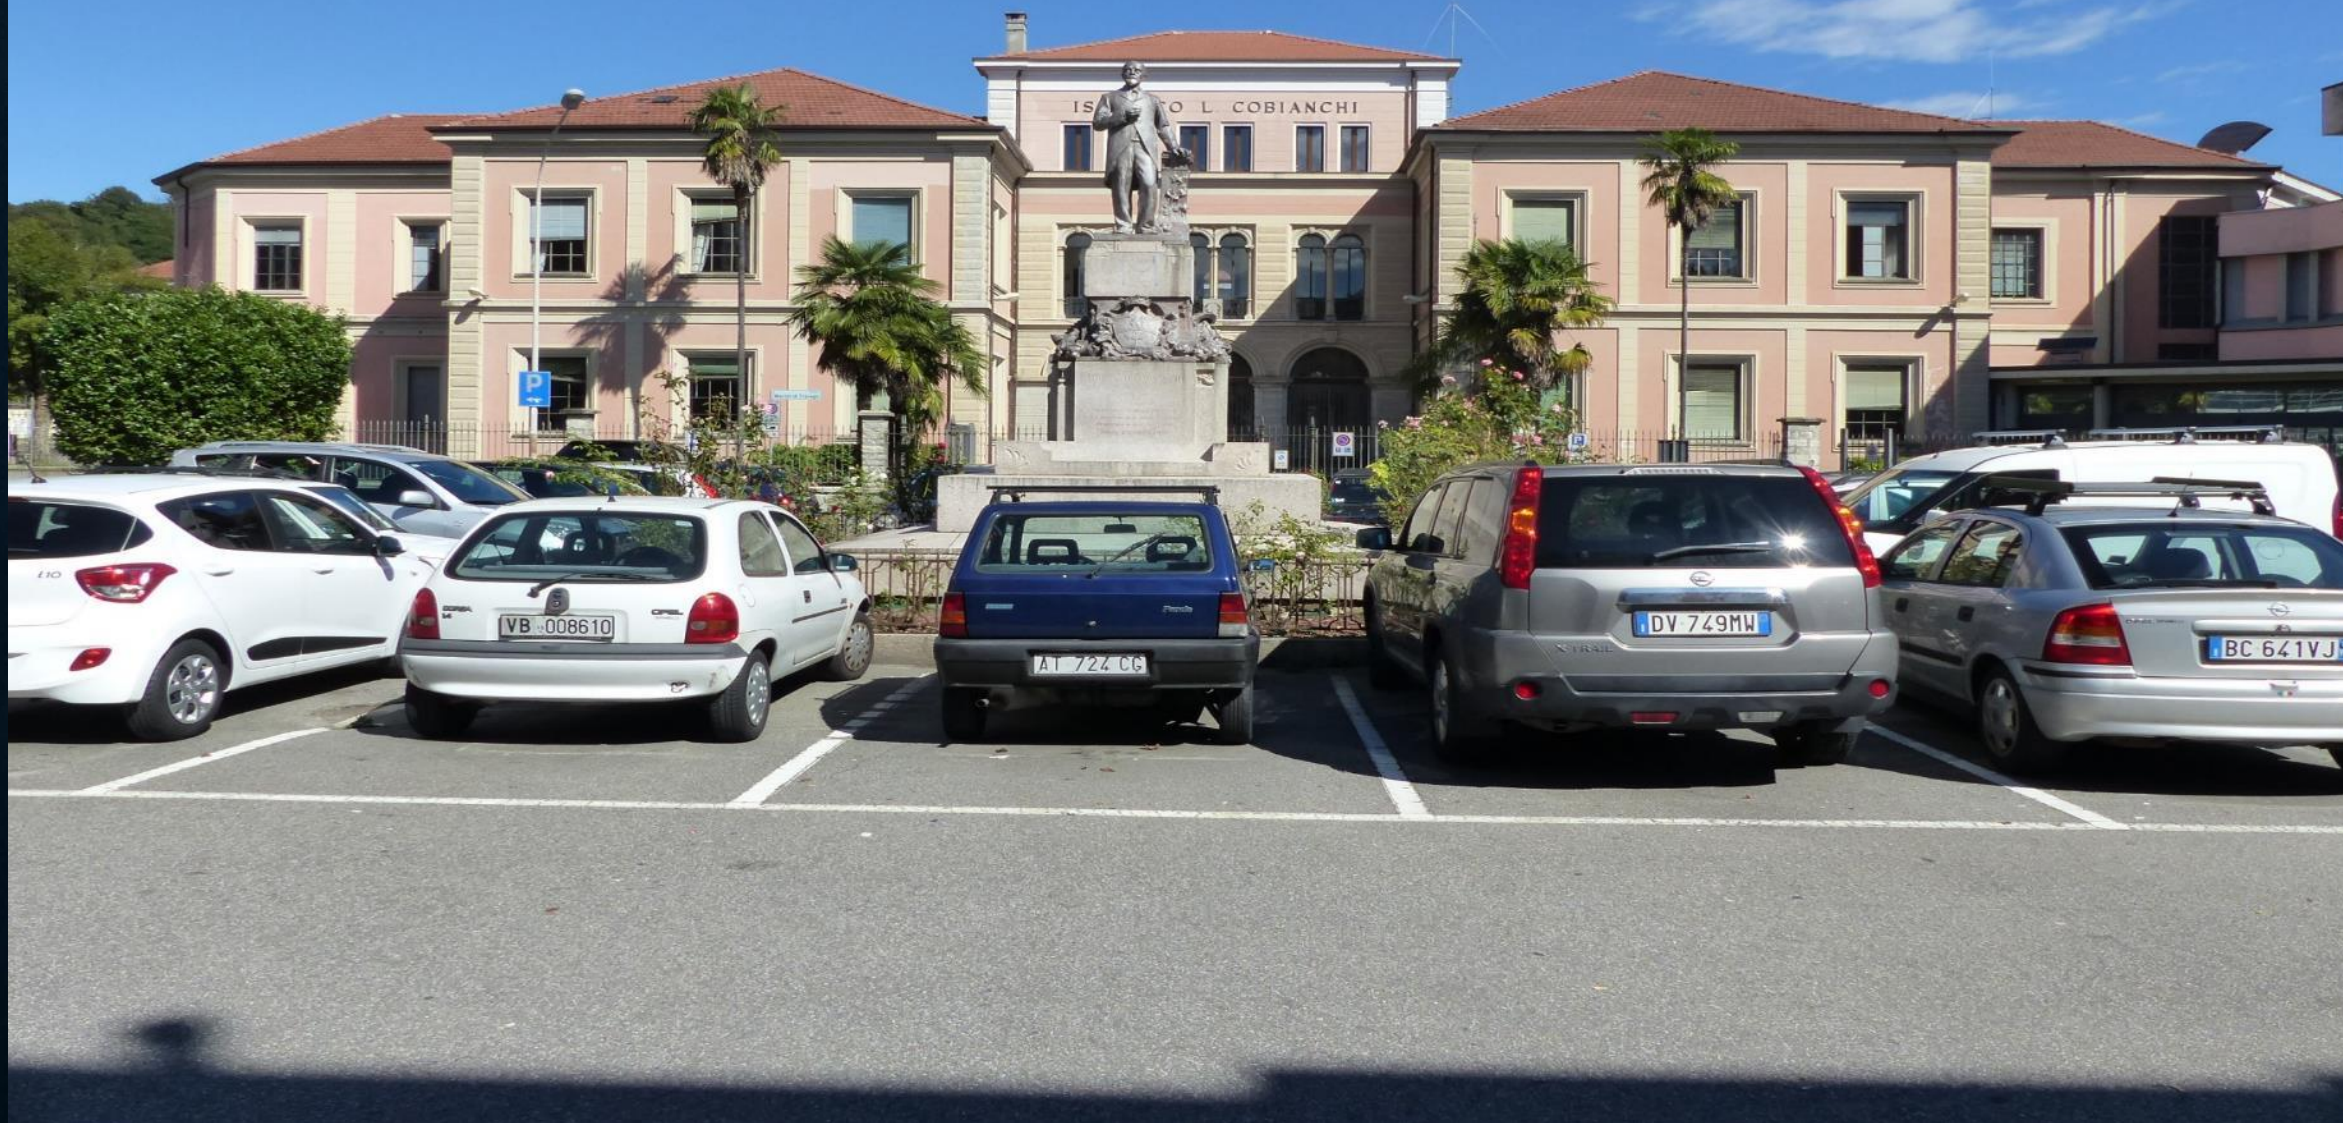



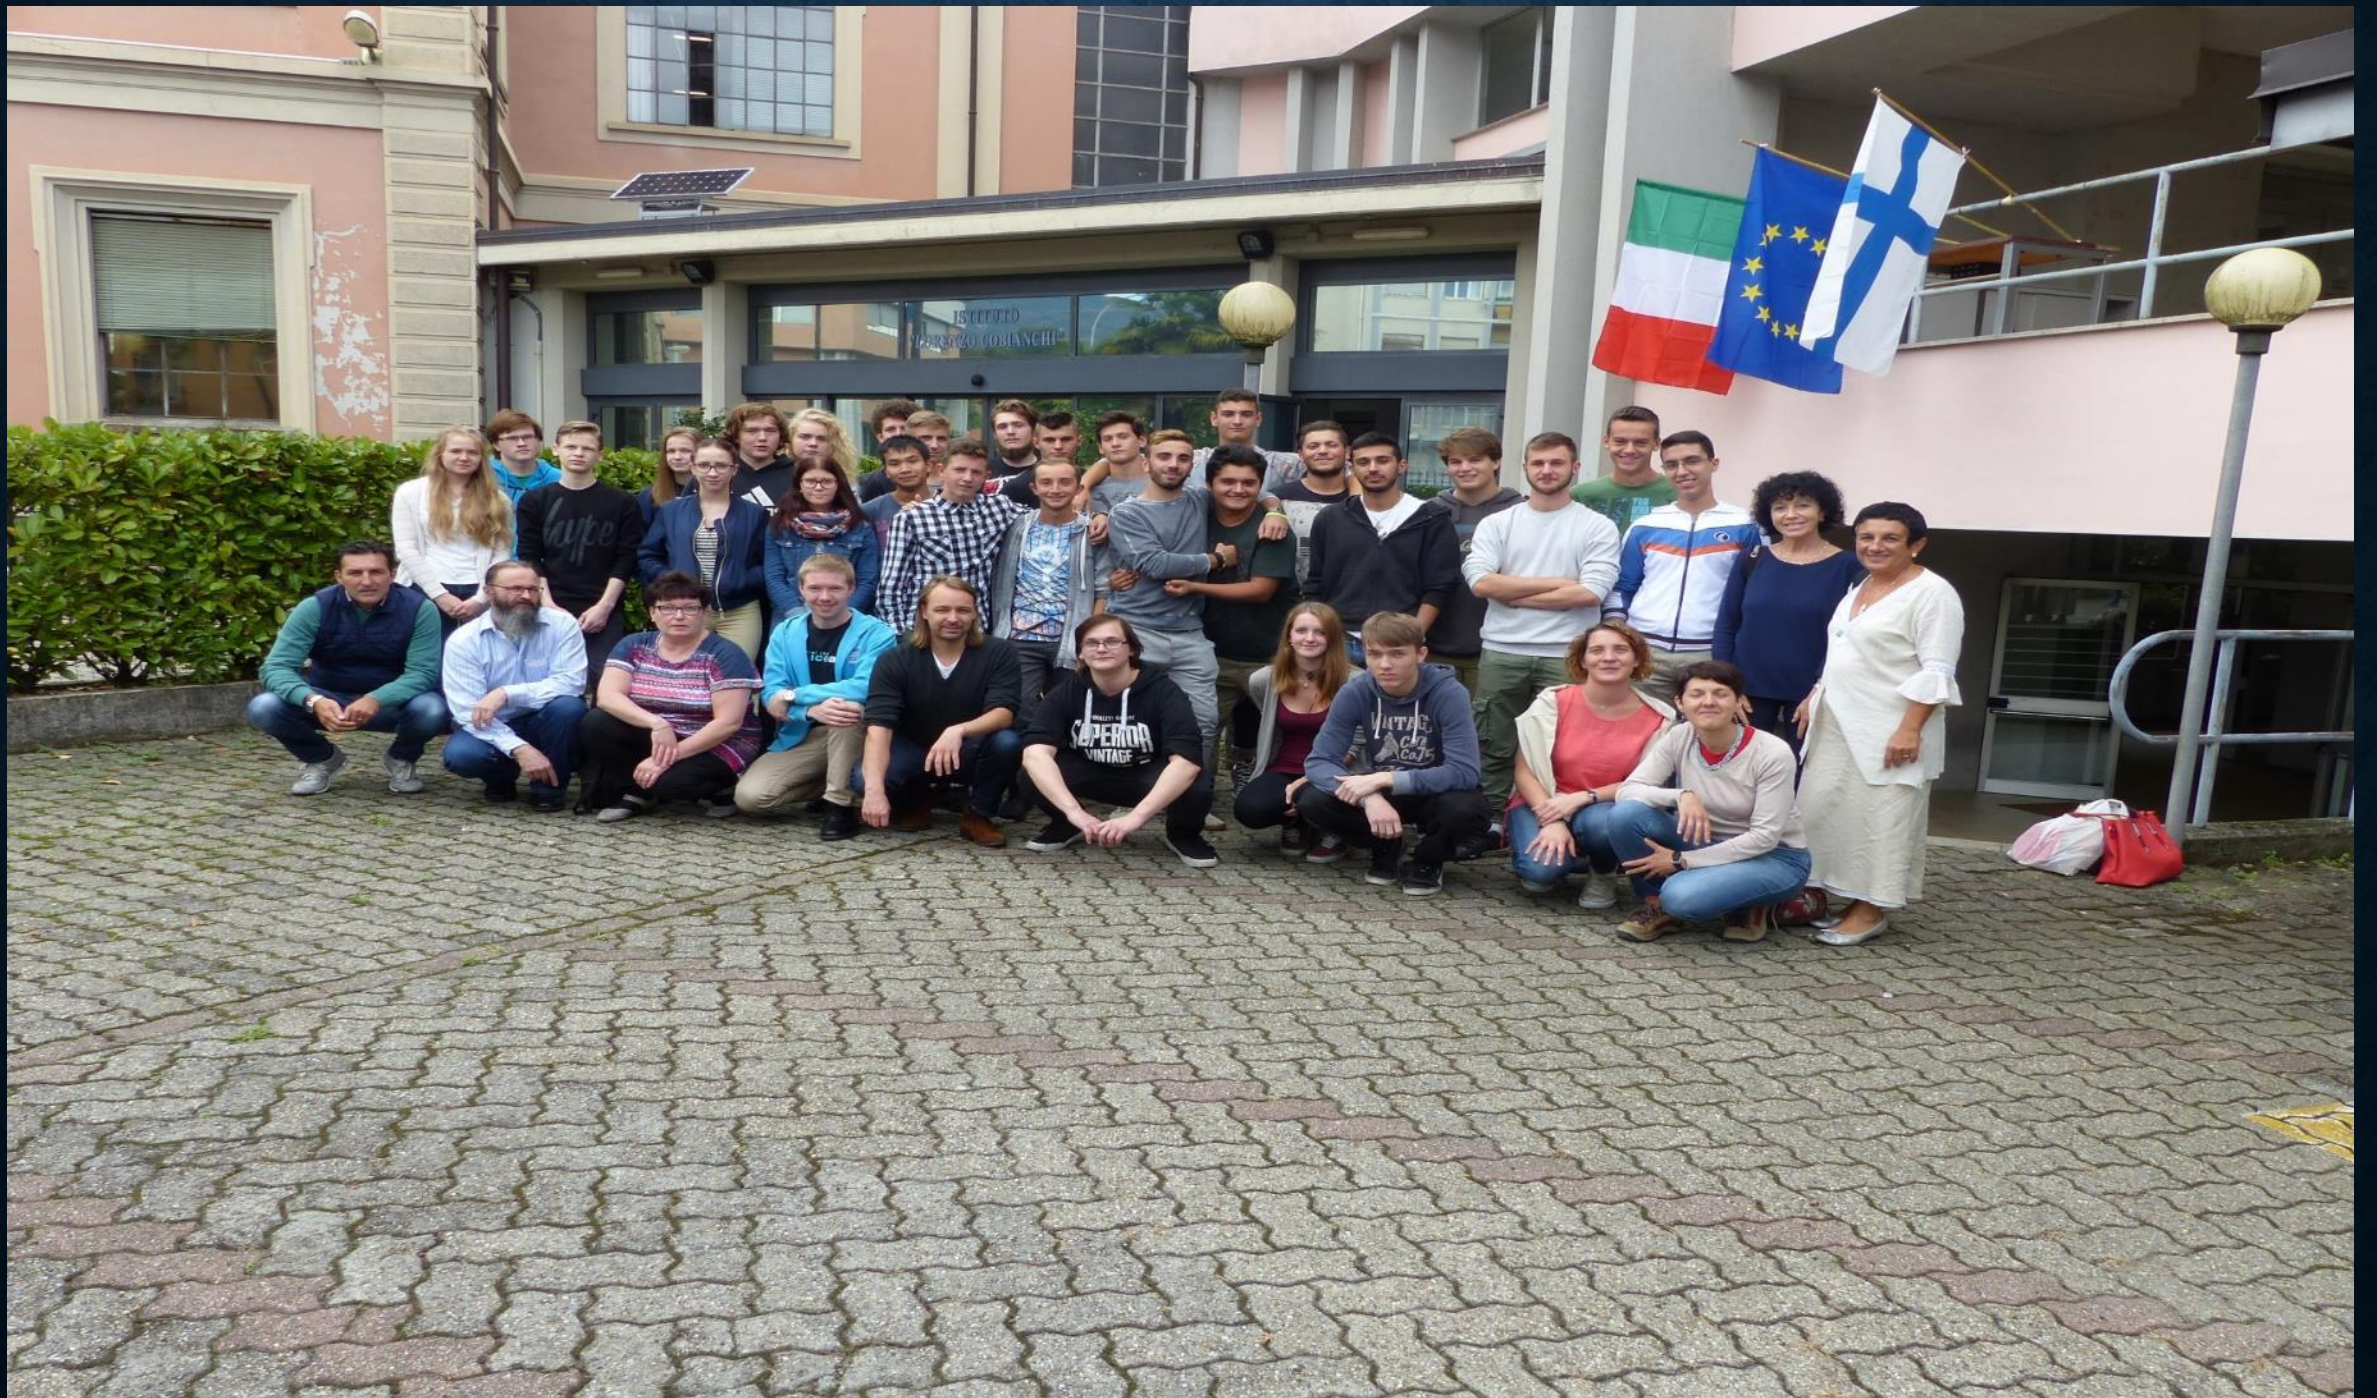



# Finnish students' presentations on Monday

 Erasmus+ Basic information of Vaala 

- a municipality in northern Finland
- population: 3 063
- at first a part of the municipality of Säräisniemi (established in 1954)
- established in 1954
- area: 1 764,03km<sup>2</sup>
- the biggest employer: Pelso prison
- Economic structure:

Municipality hall  
picture: Jasmin Väänänen

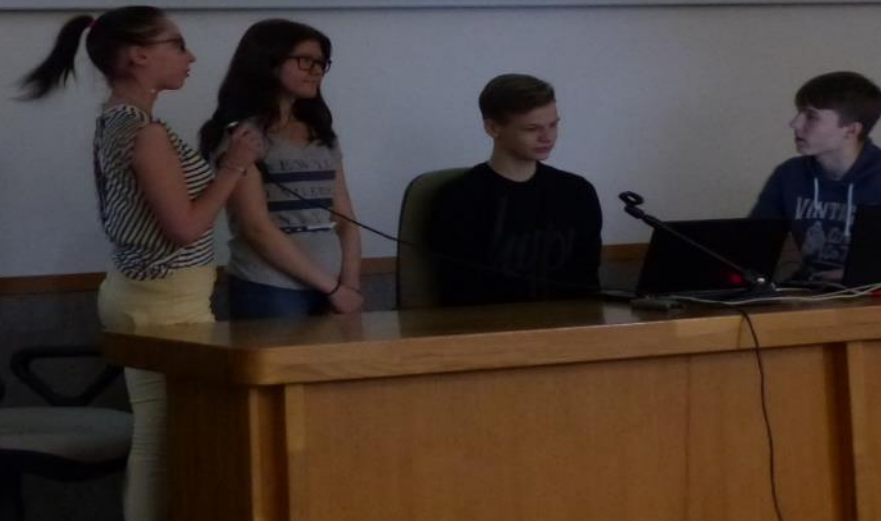

# Italian students' presentations

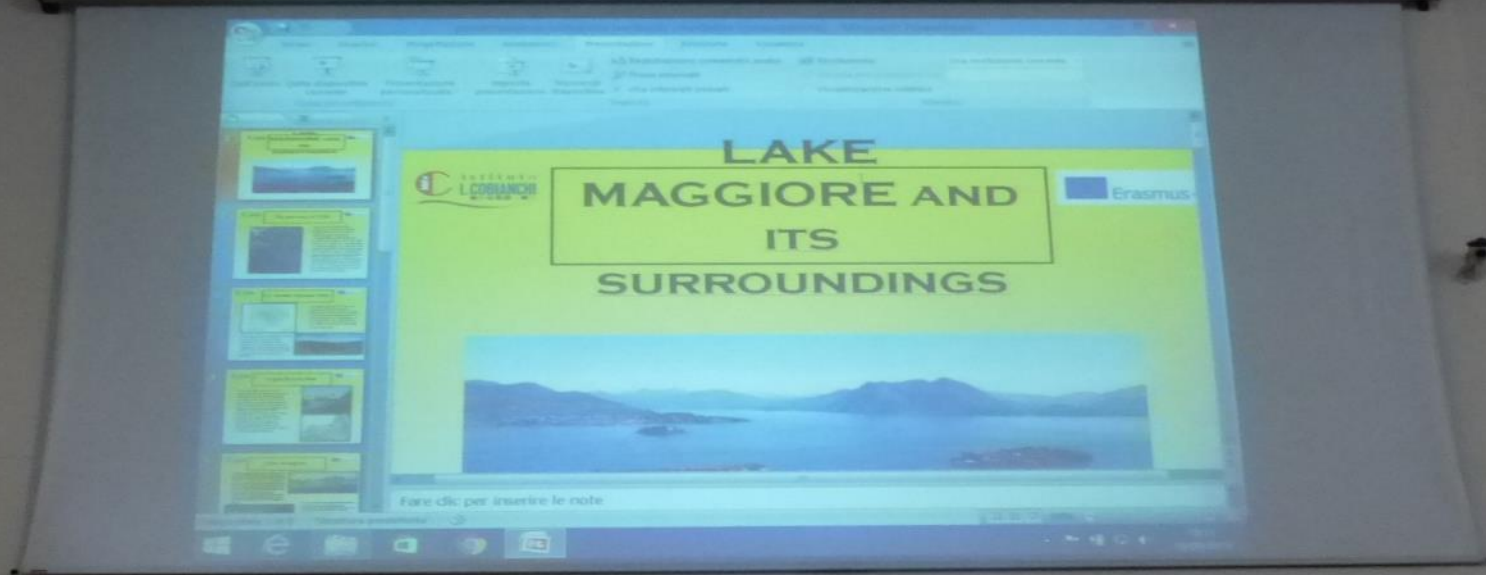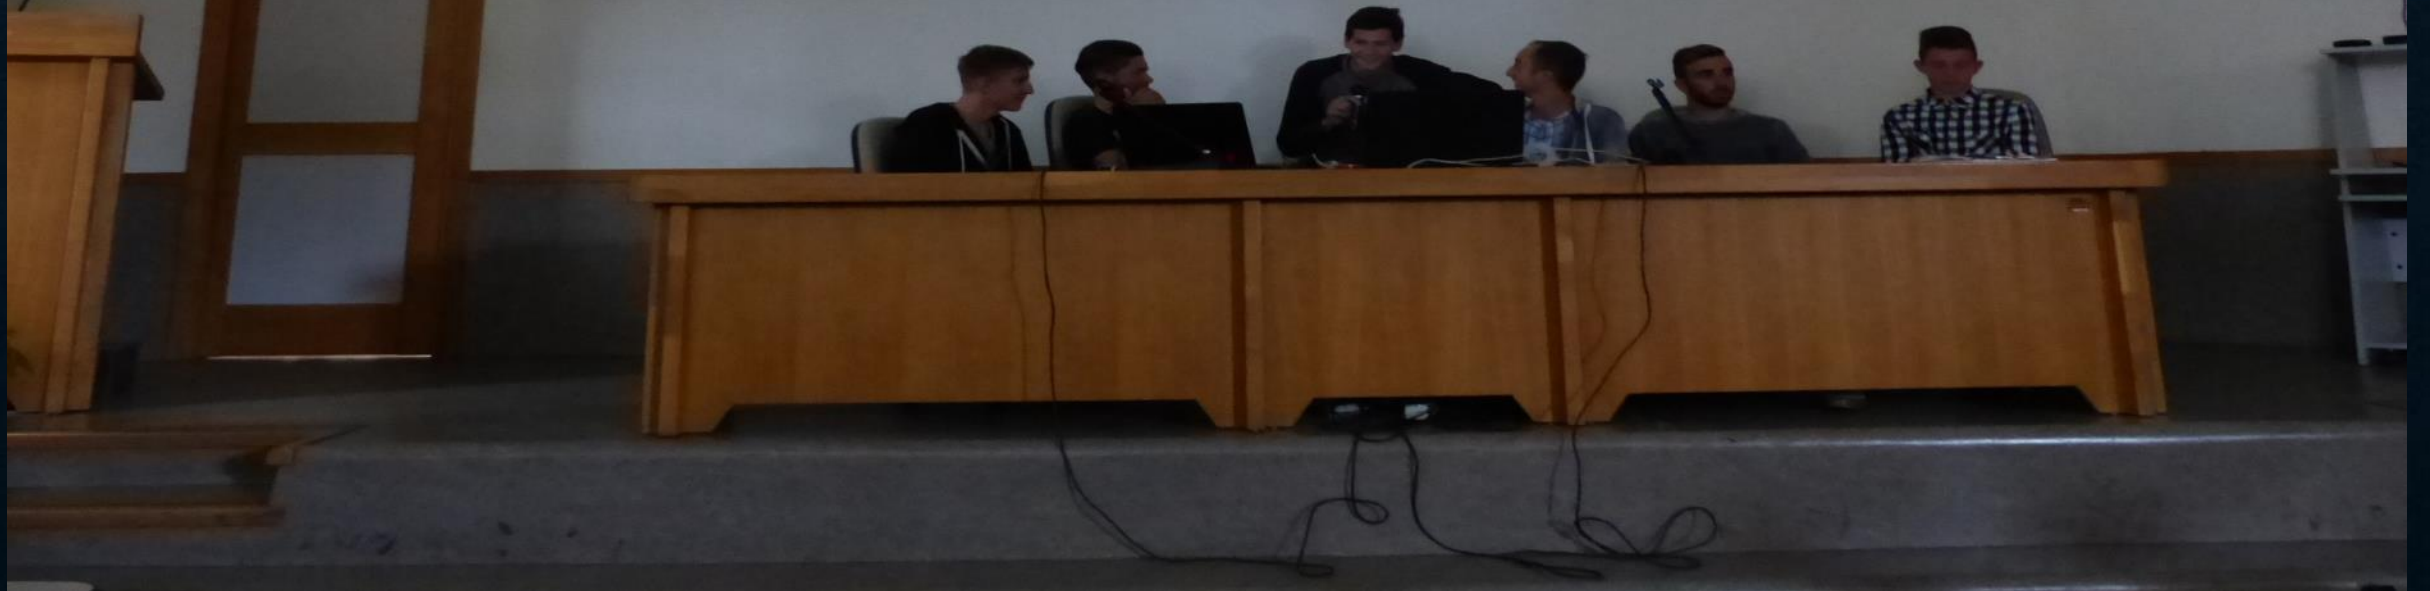



# Mikko Kiuttu, Rokua Geopark

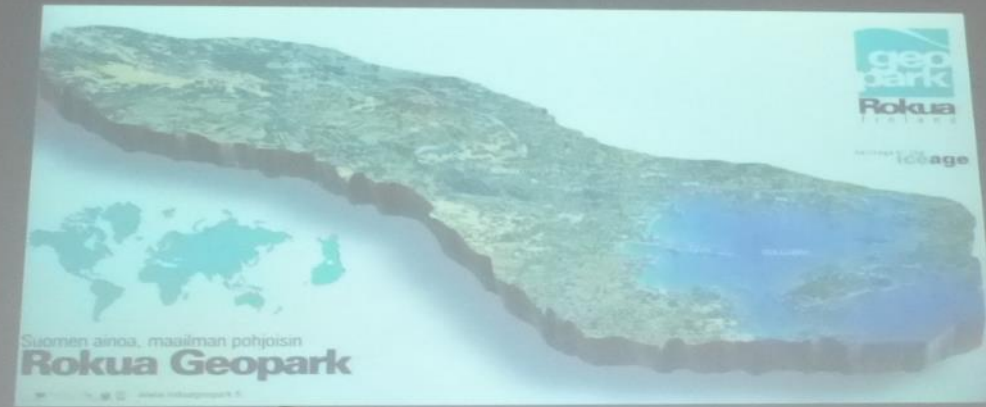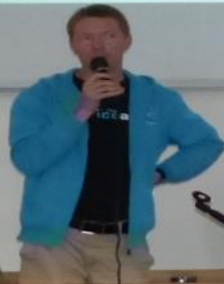

# Alessandra Magagna, Turin University

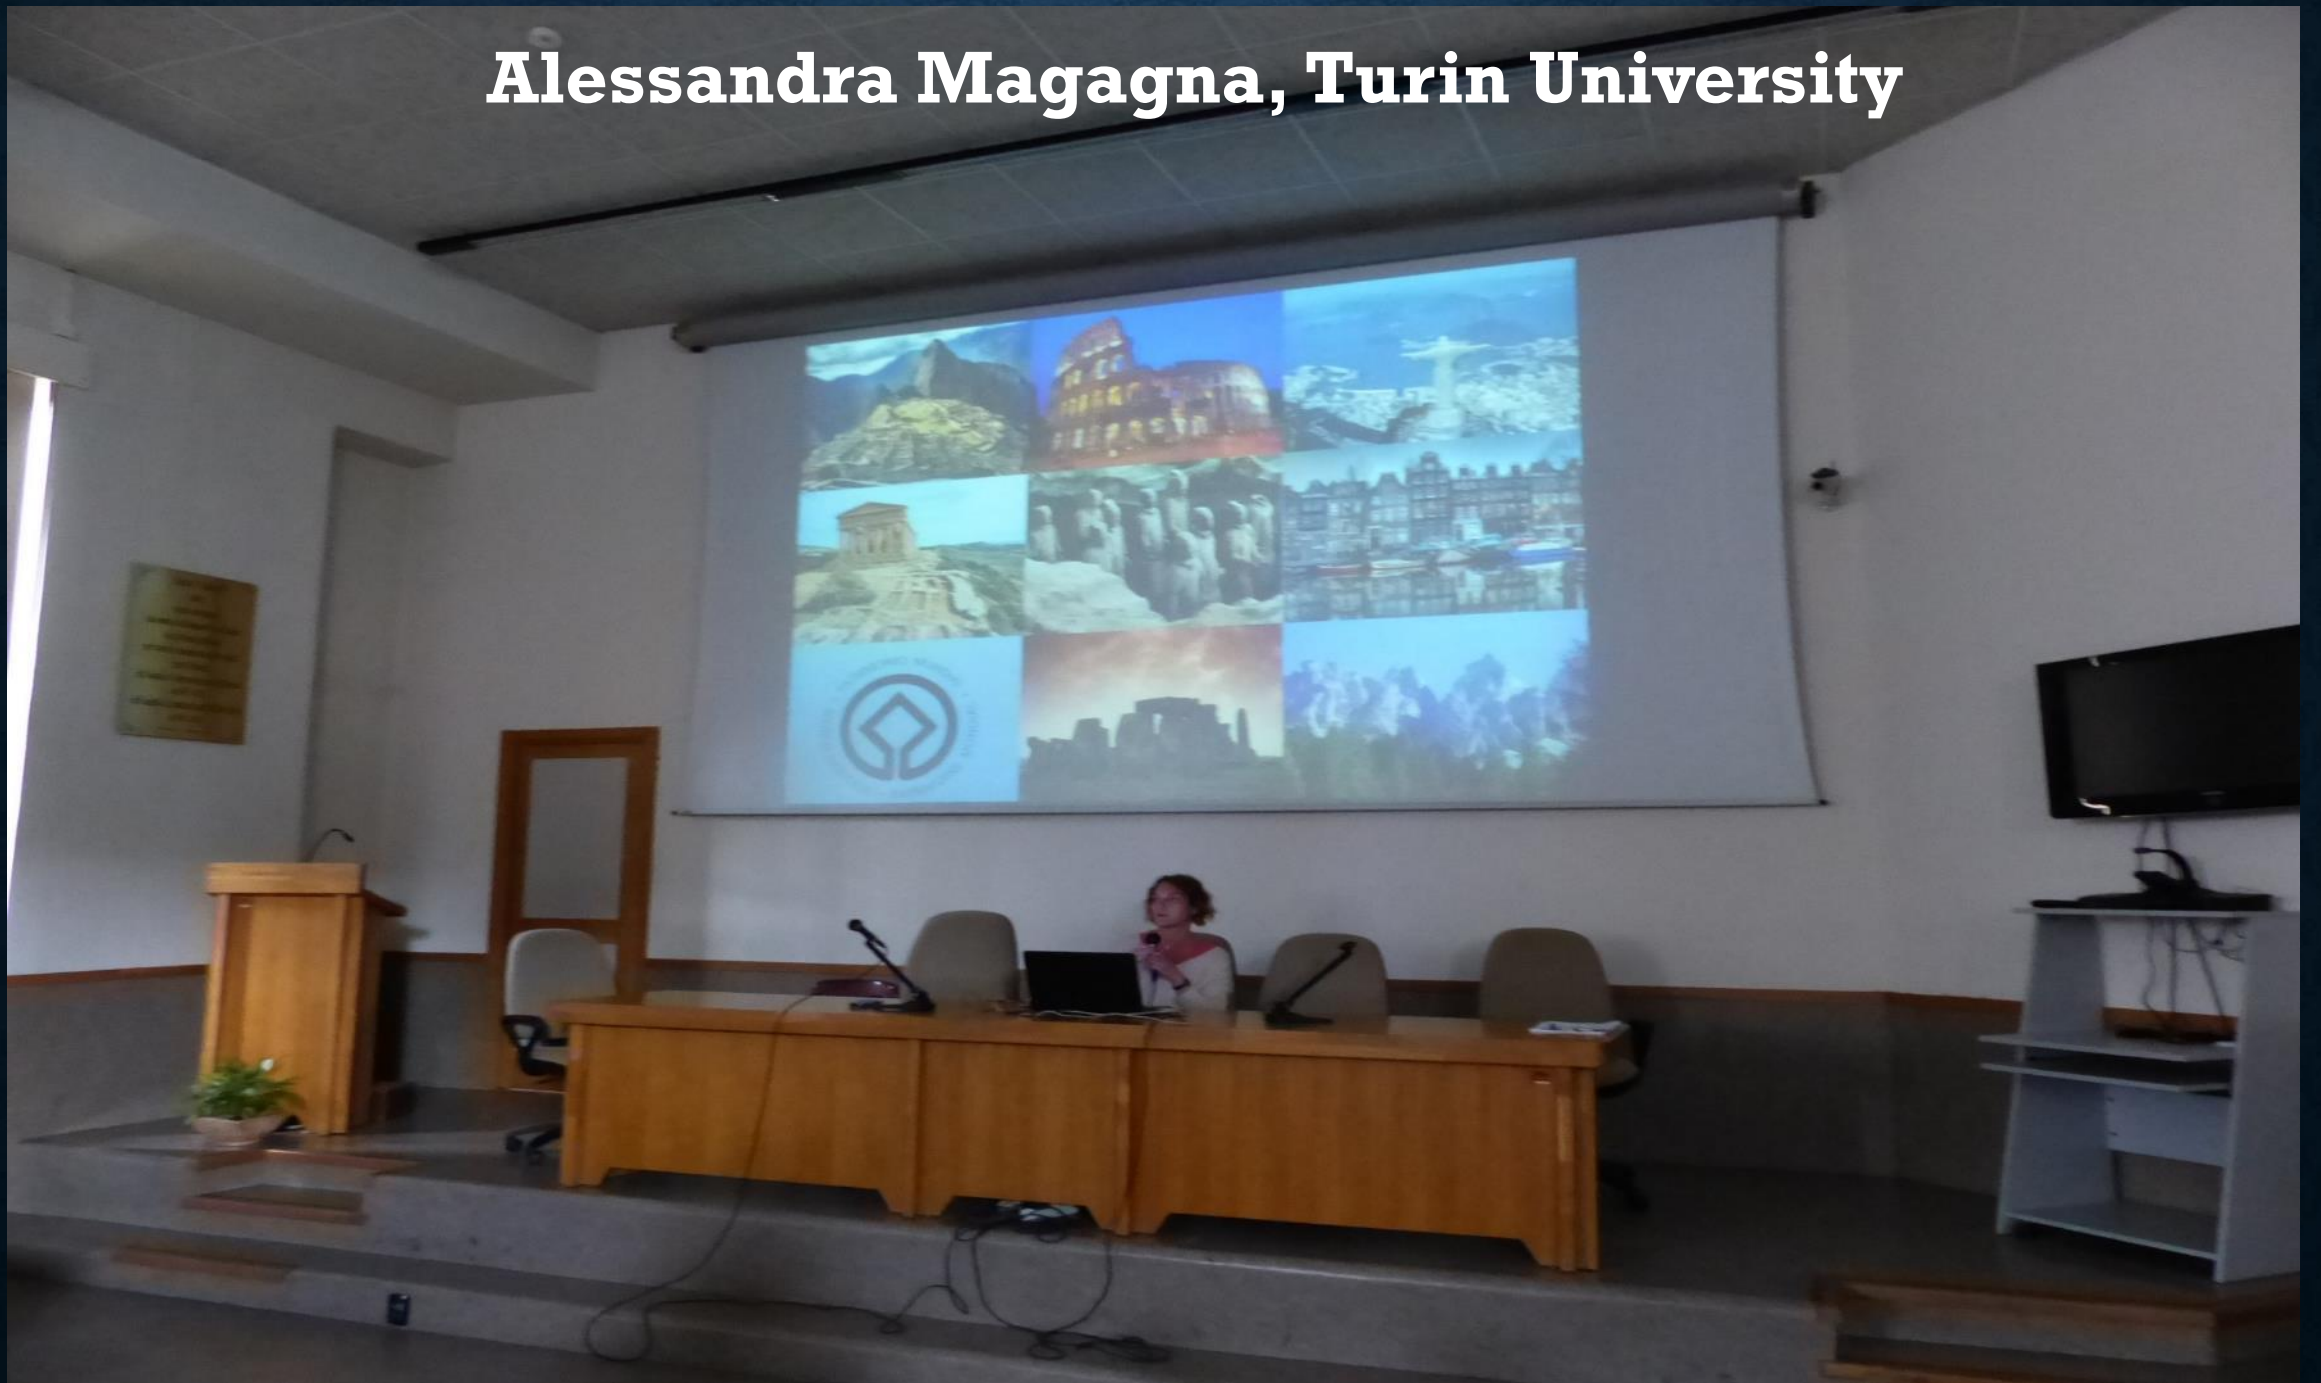



# Ilaria Selva, Turin University

Logos: University of Turin, European Union, Erasmus+, I.C. Bianchi, and others.

Days 3 & 4: Fieldtrip in the Sesia Valley

**MAN and CLIMATE:**  
*from the past, through the present, for the future*



Italy, September 19<sup>th</sup> – September 23<sup>rd</sup> 2016 Geoheritage and climate change opening the secrets of home



## Lunch in the school canteen

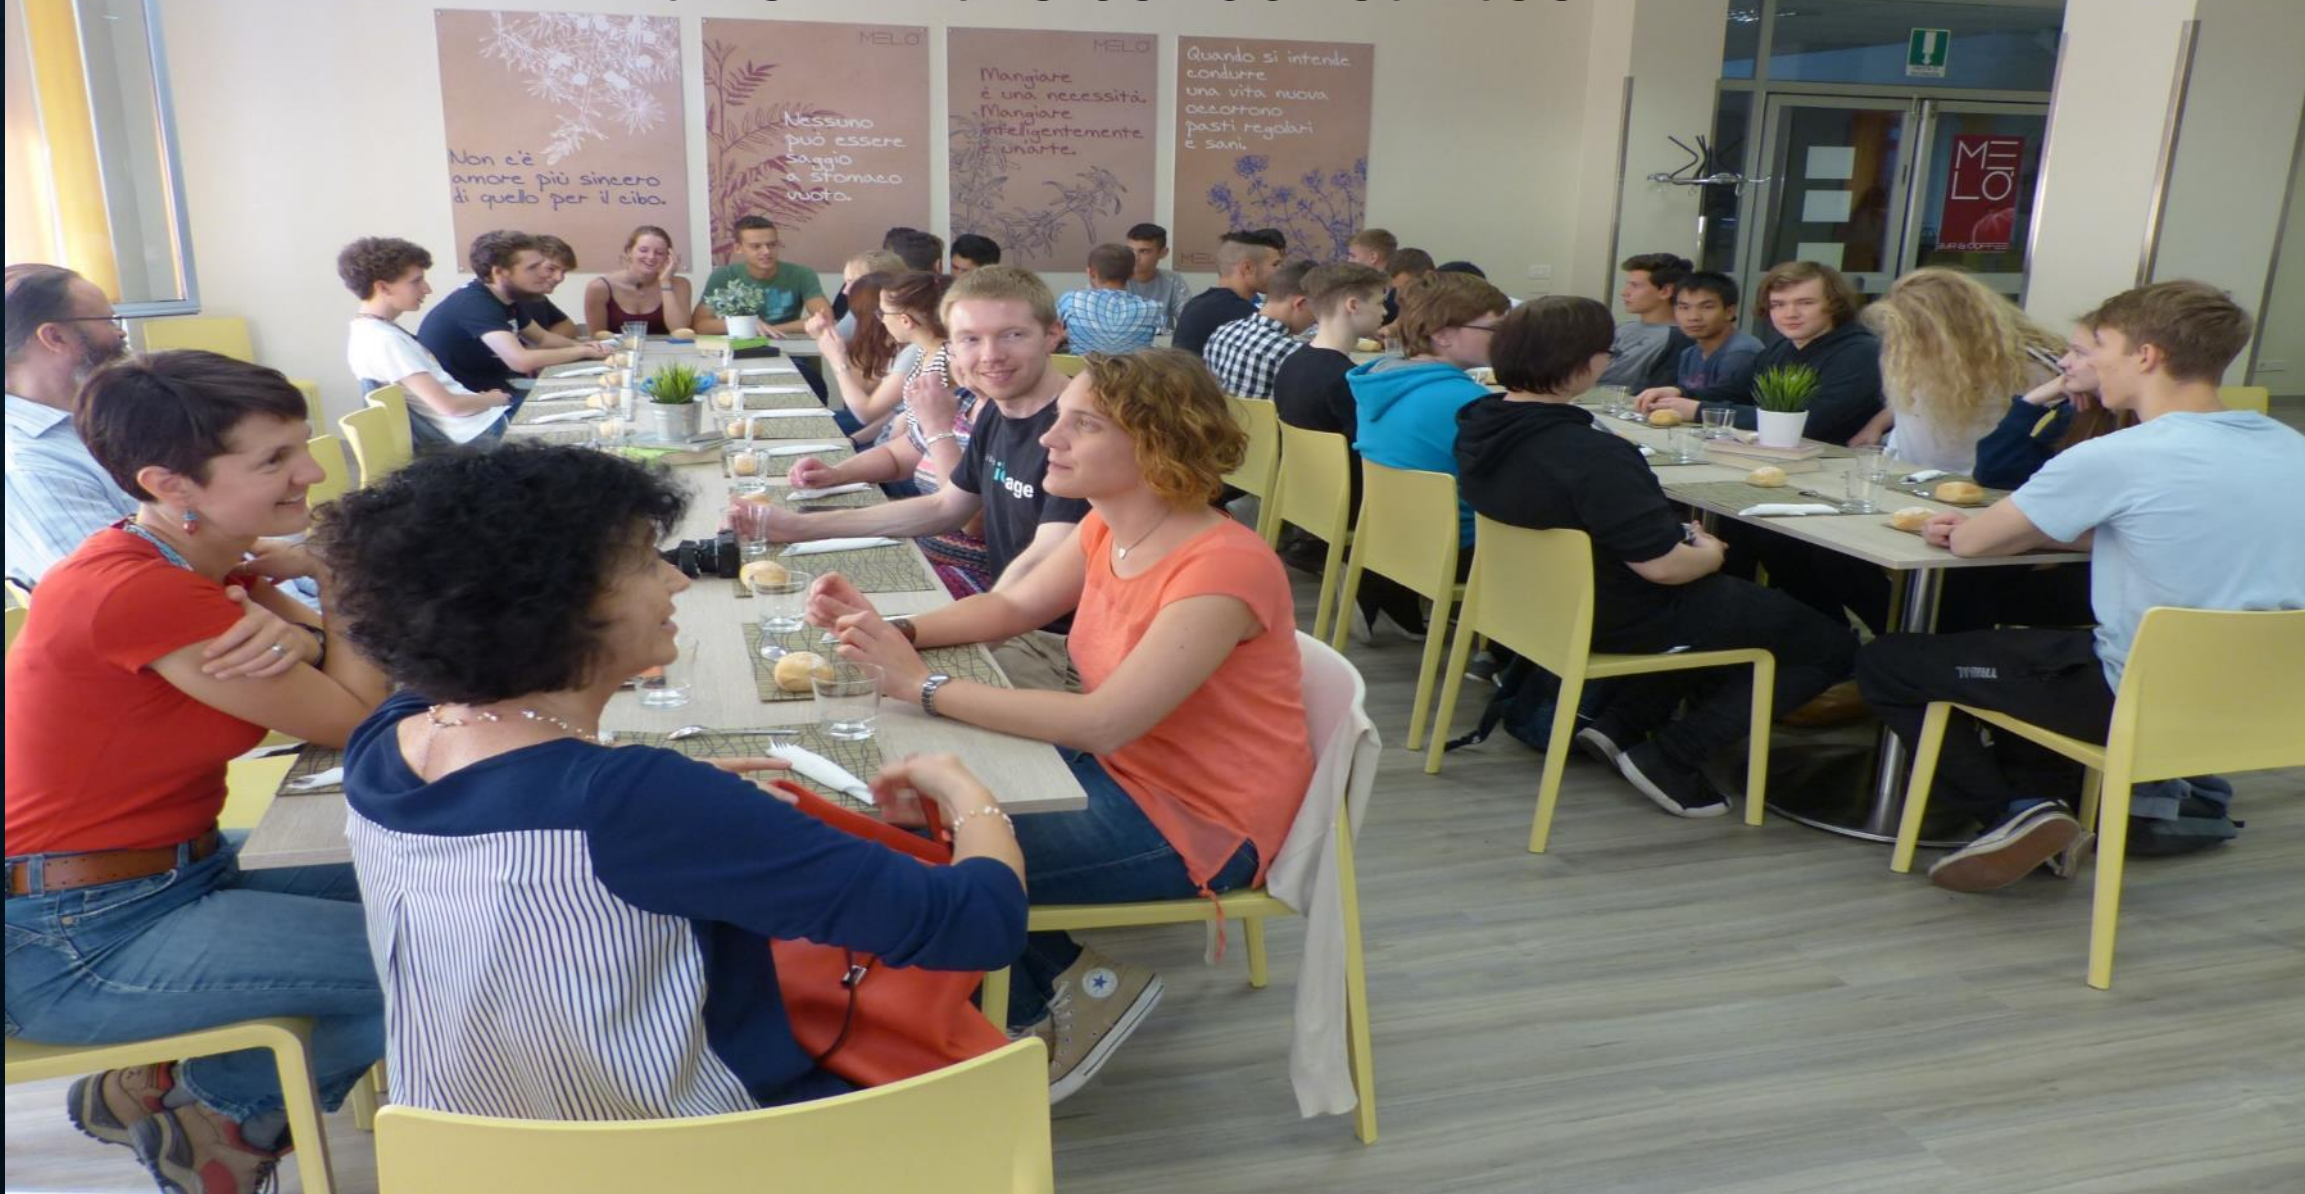



# Teachers by Lake Maggiore

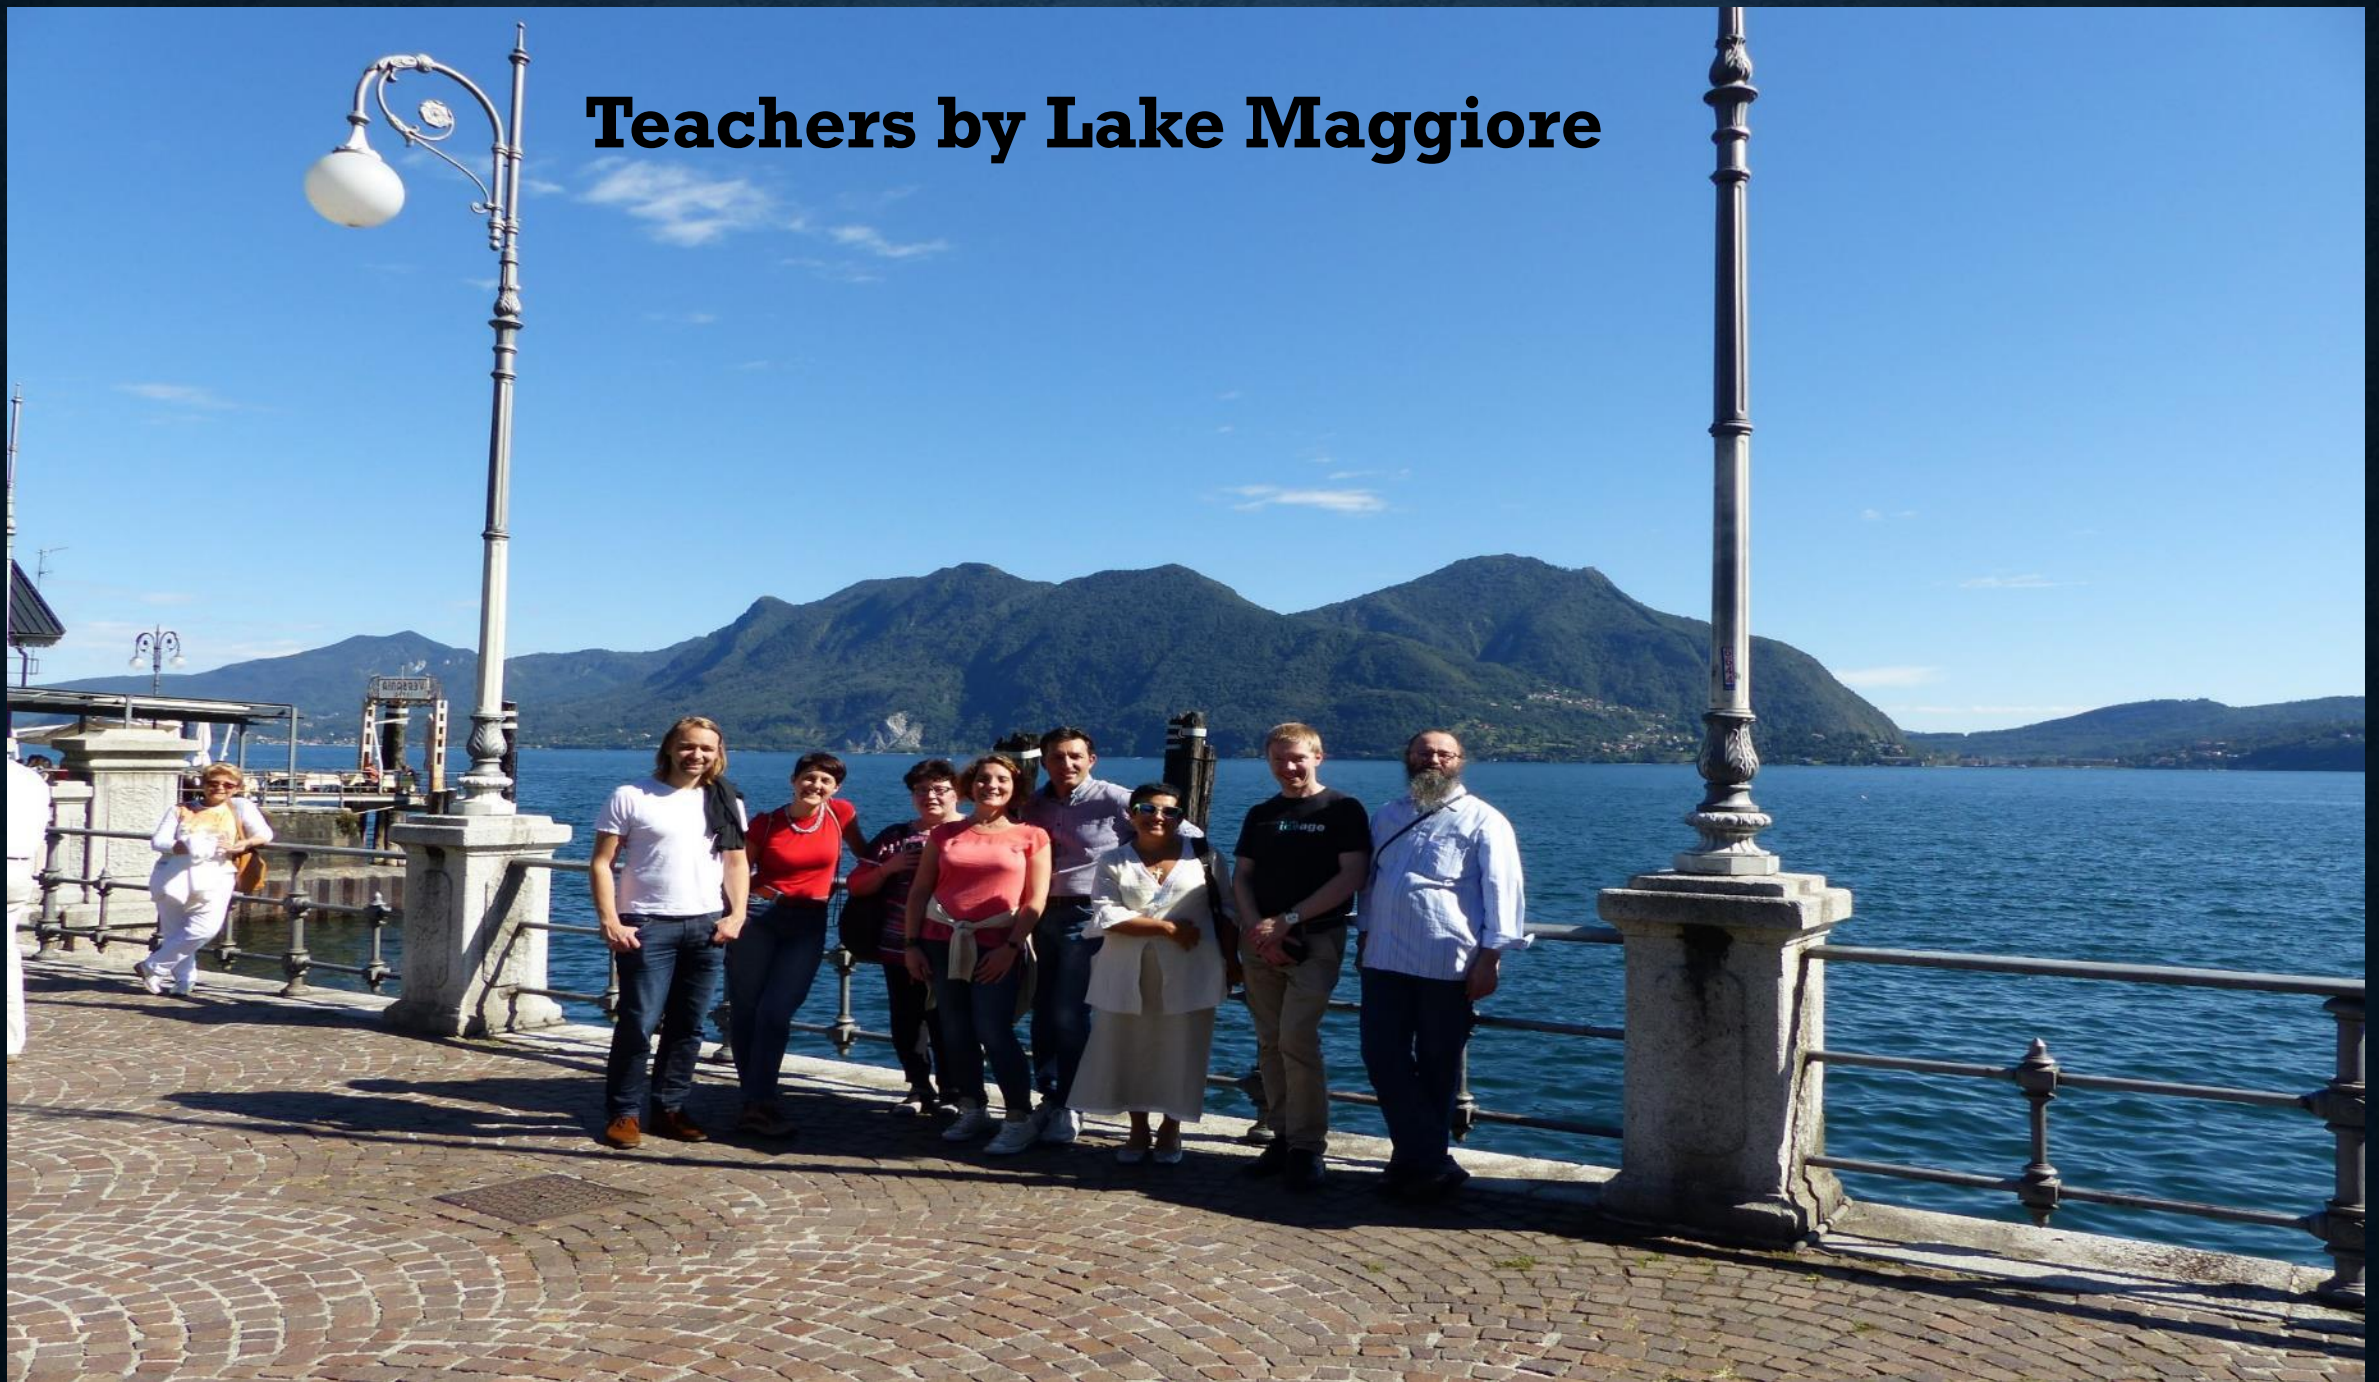



# Visiting ARPA, the Regional Agency for the Protection of the environment

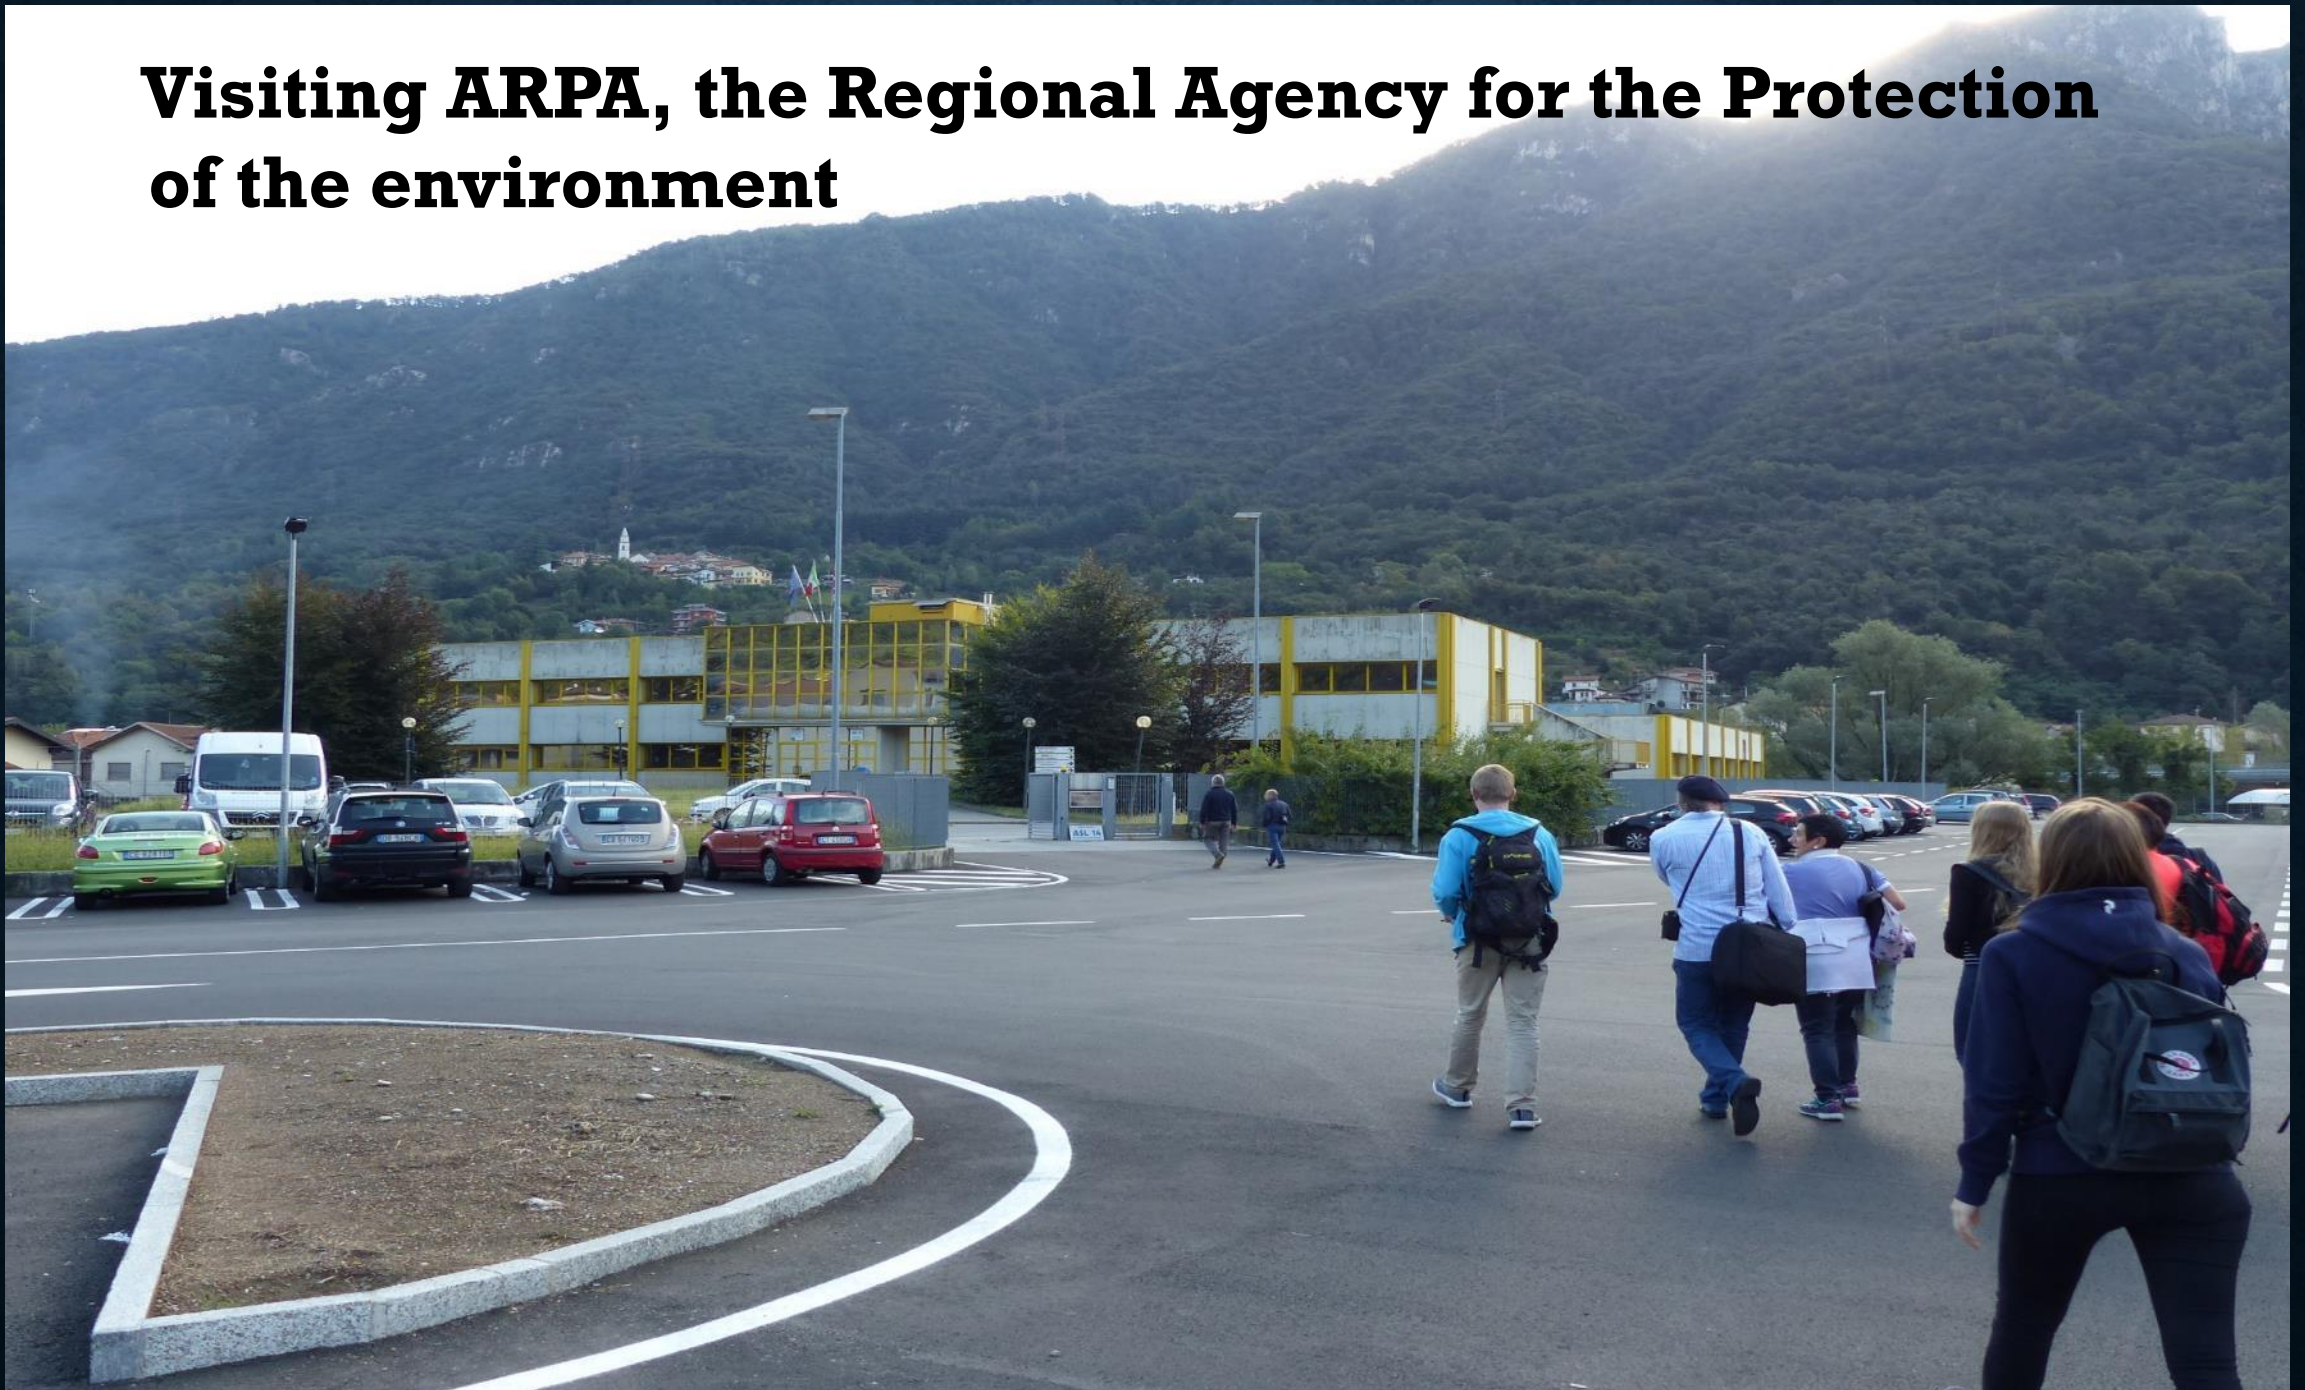



# Presentation on dragonflies

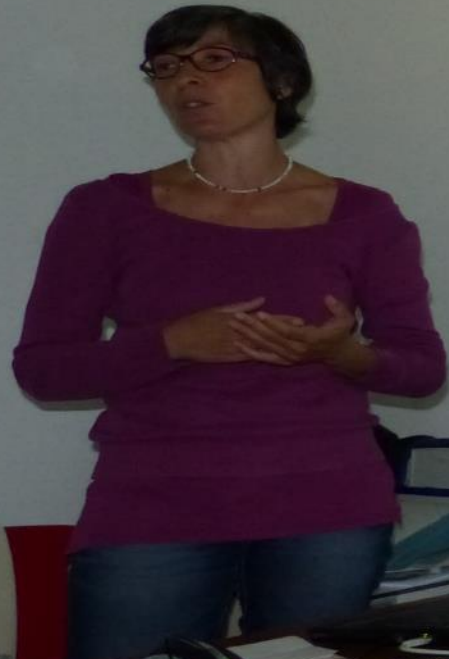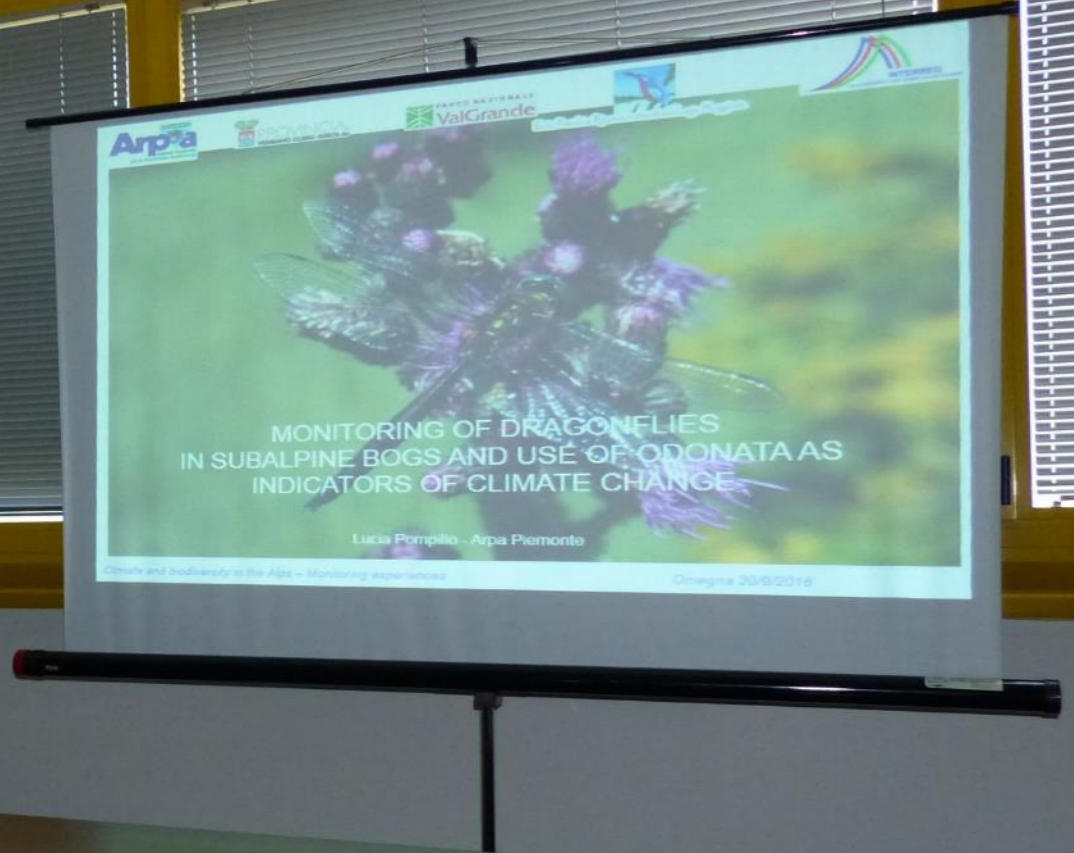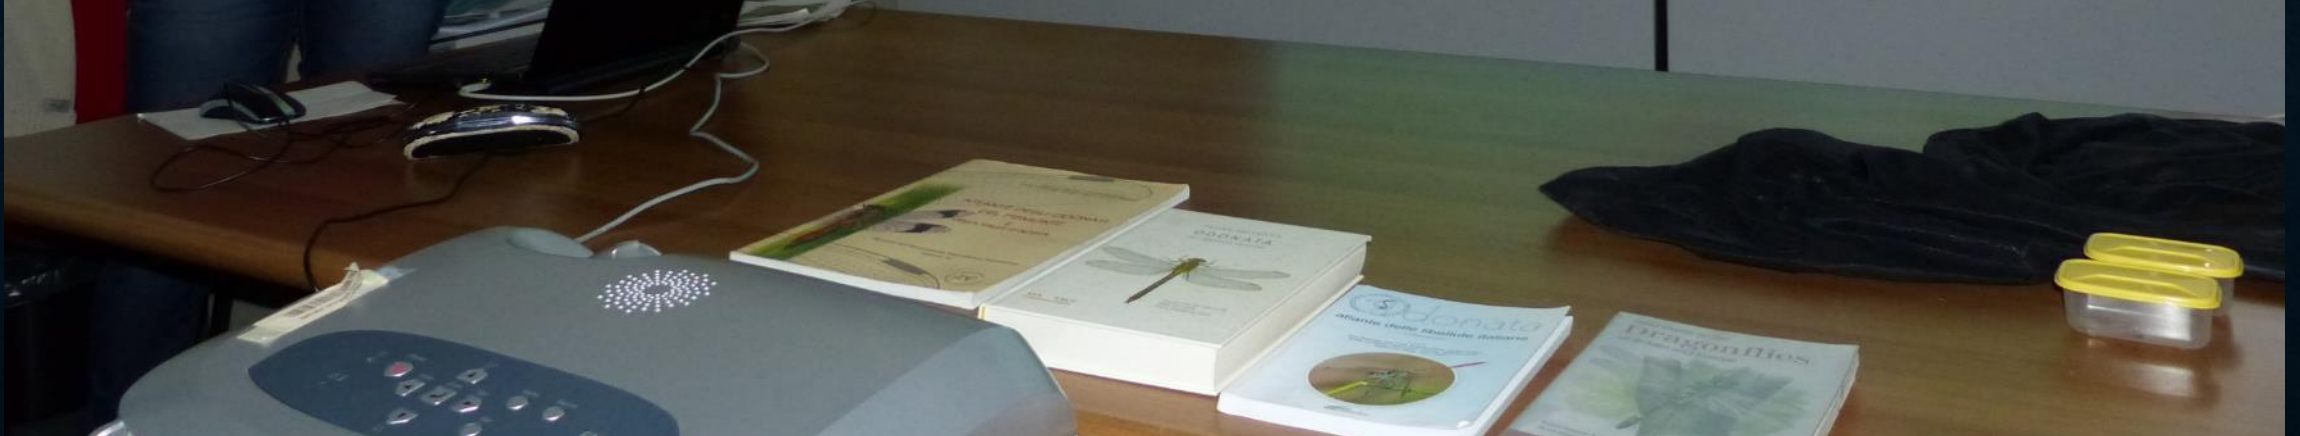



to the

# gonflies

d Europe

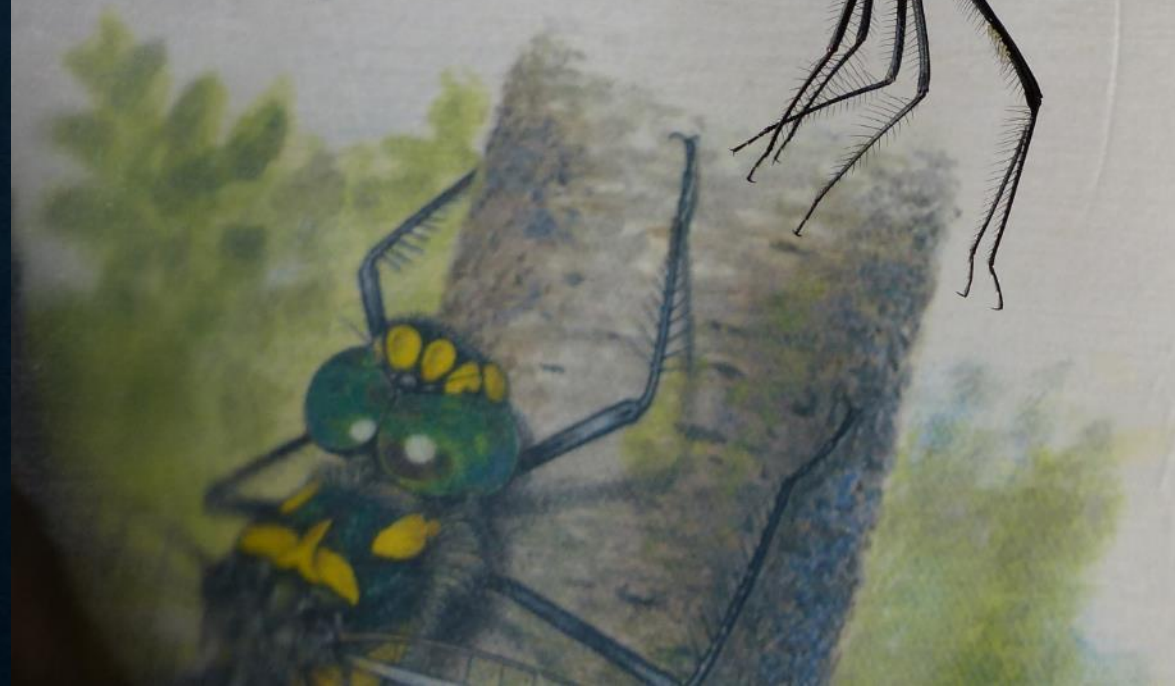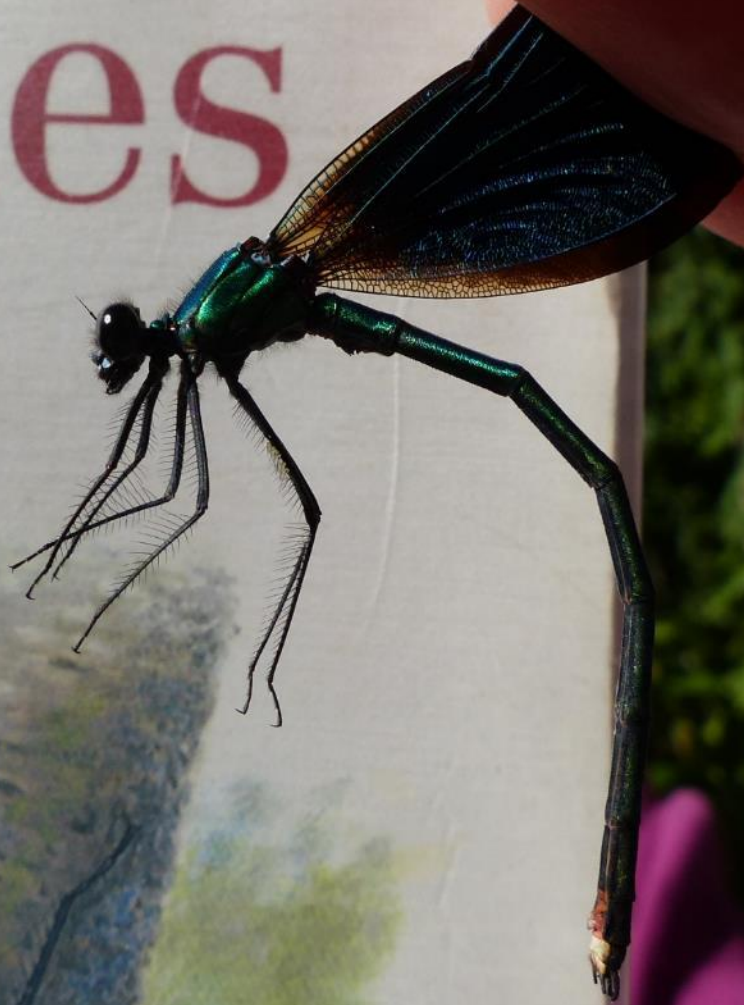



# Presentation on diatoms

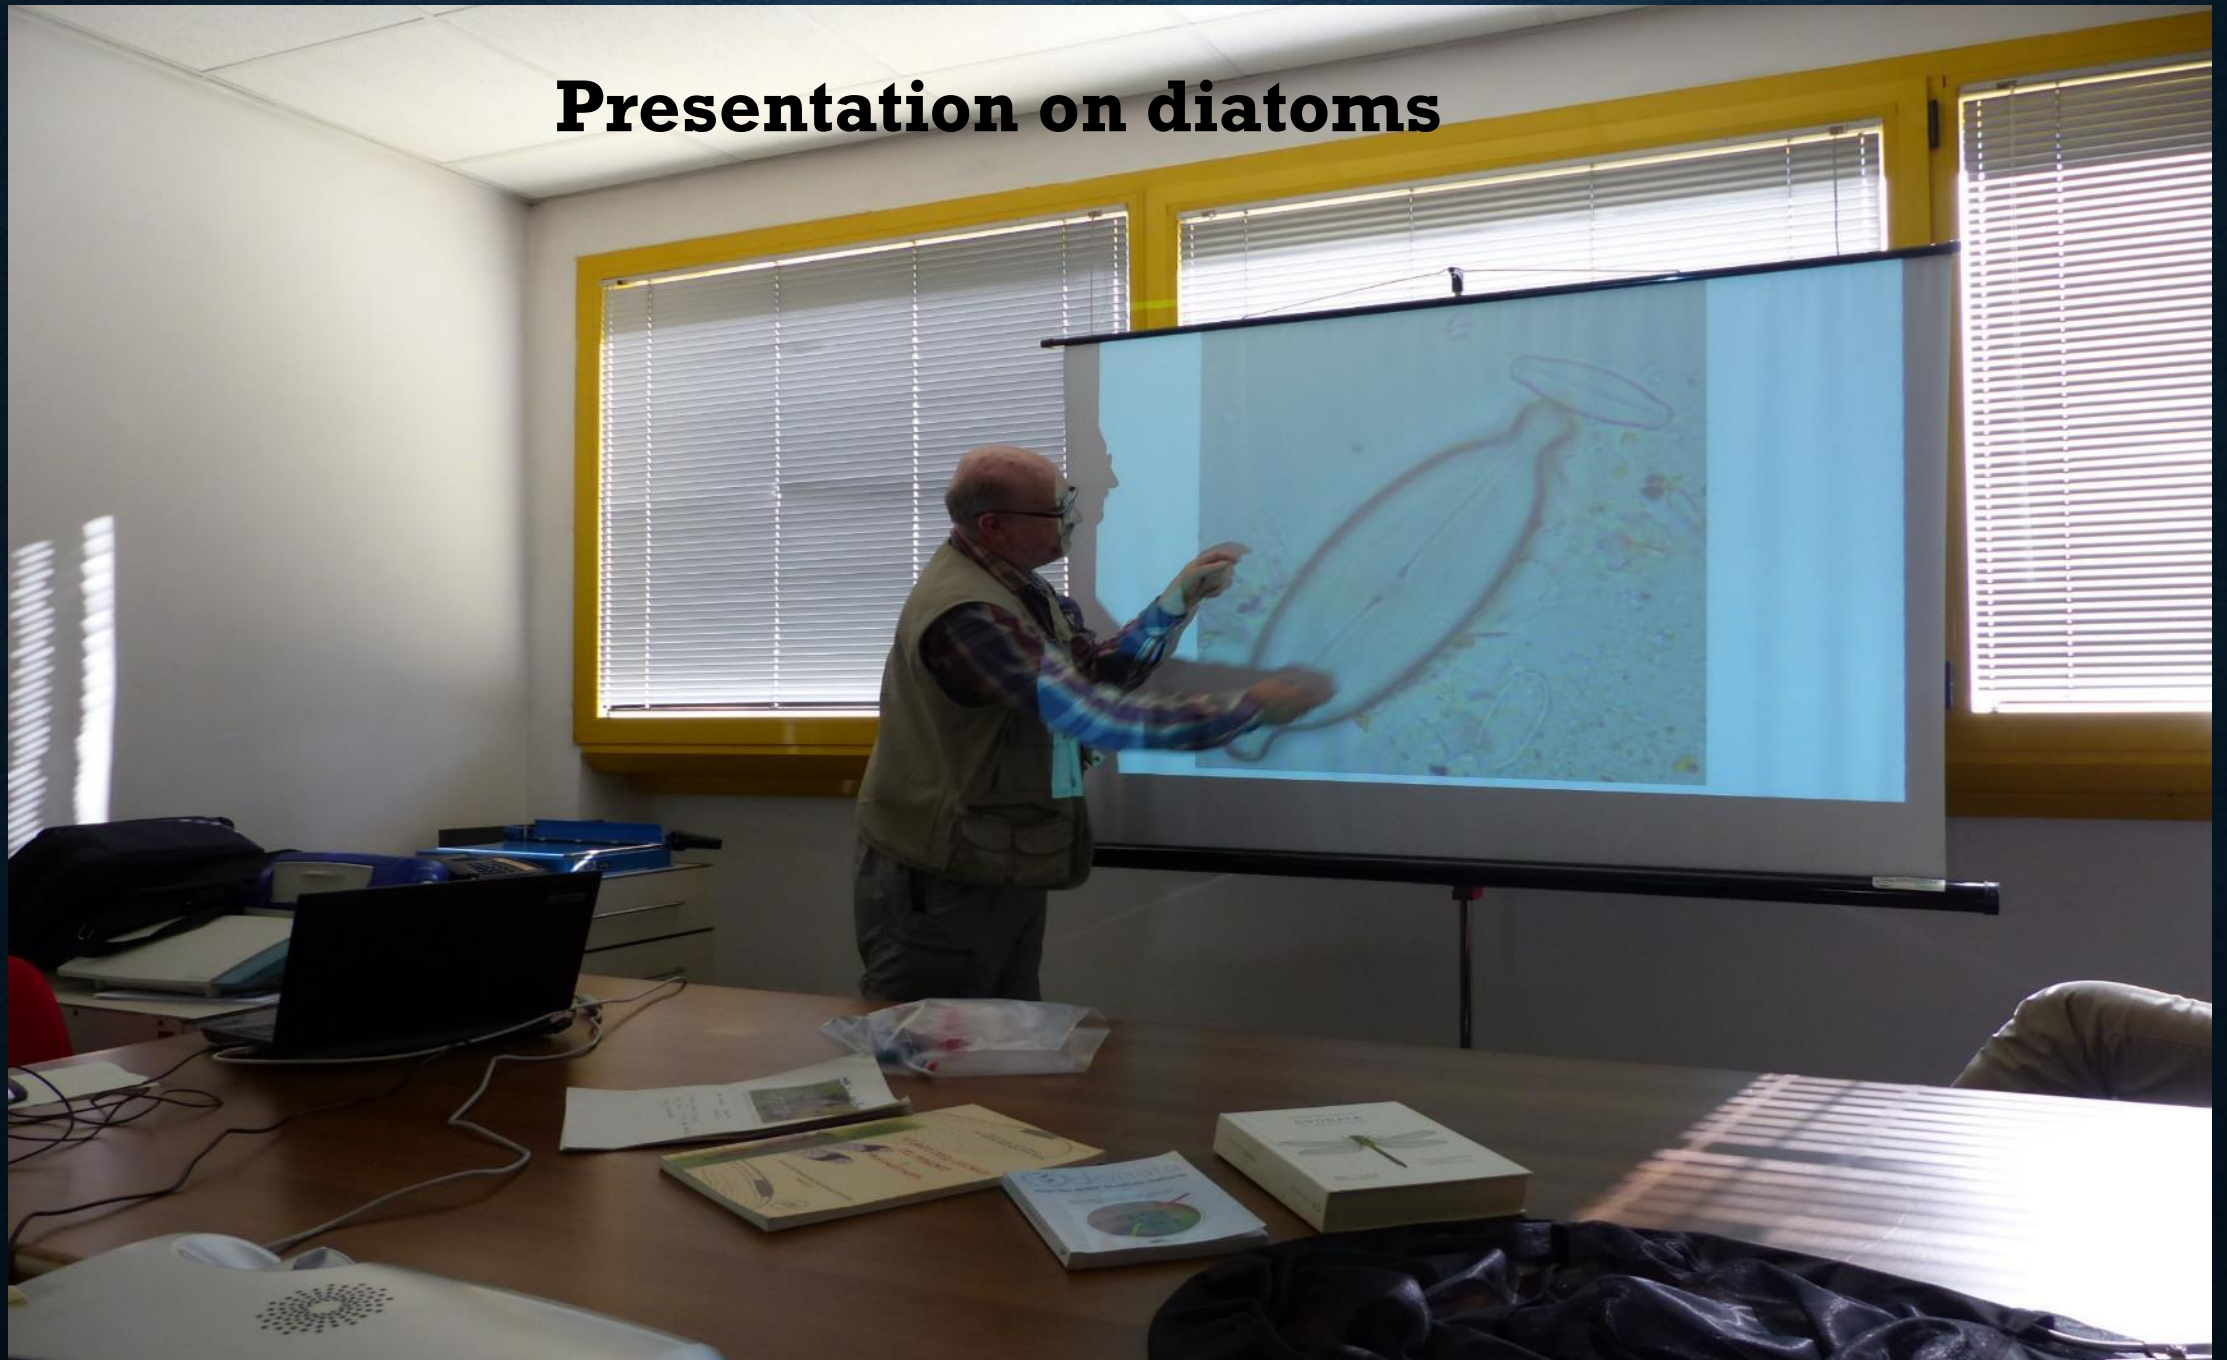



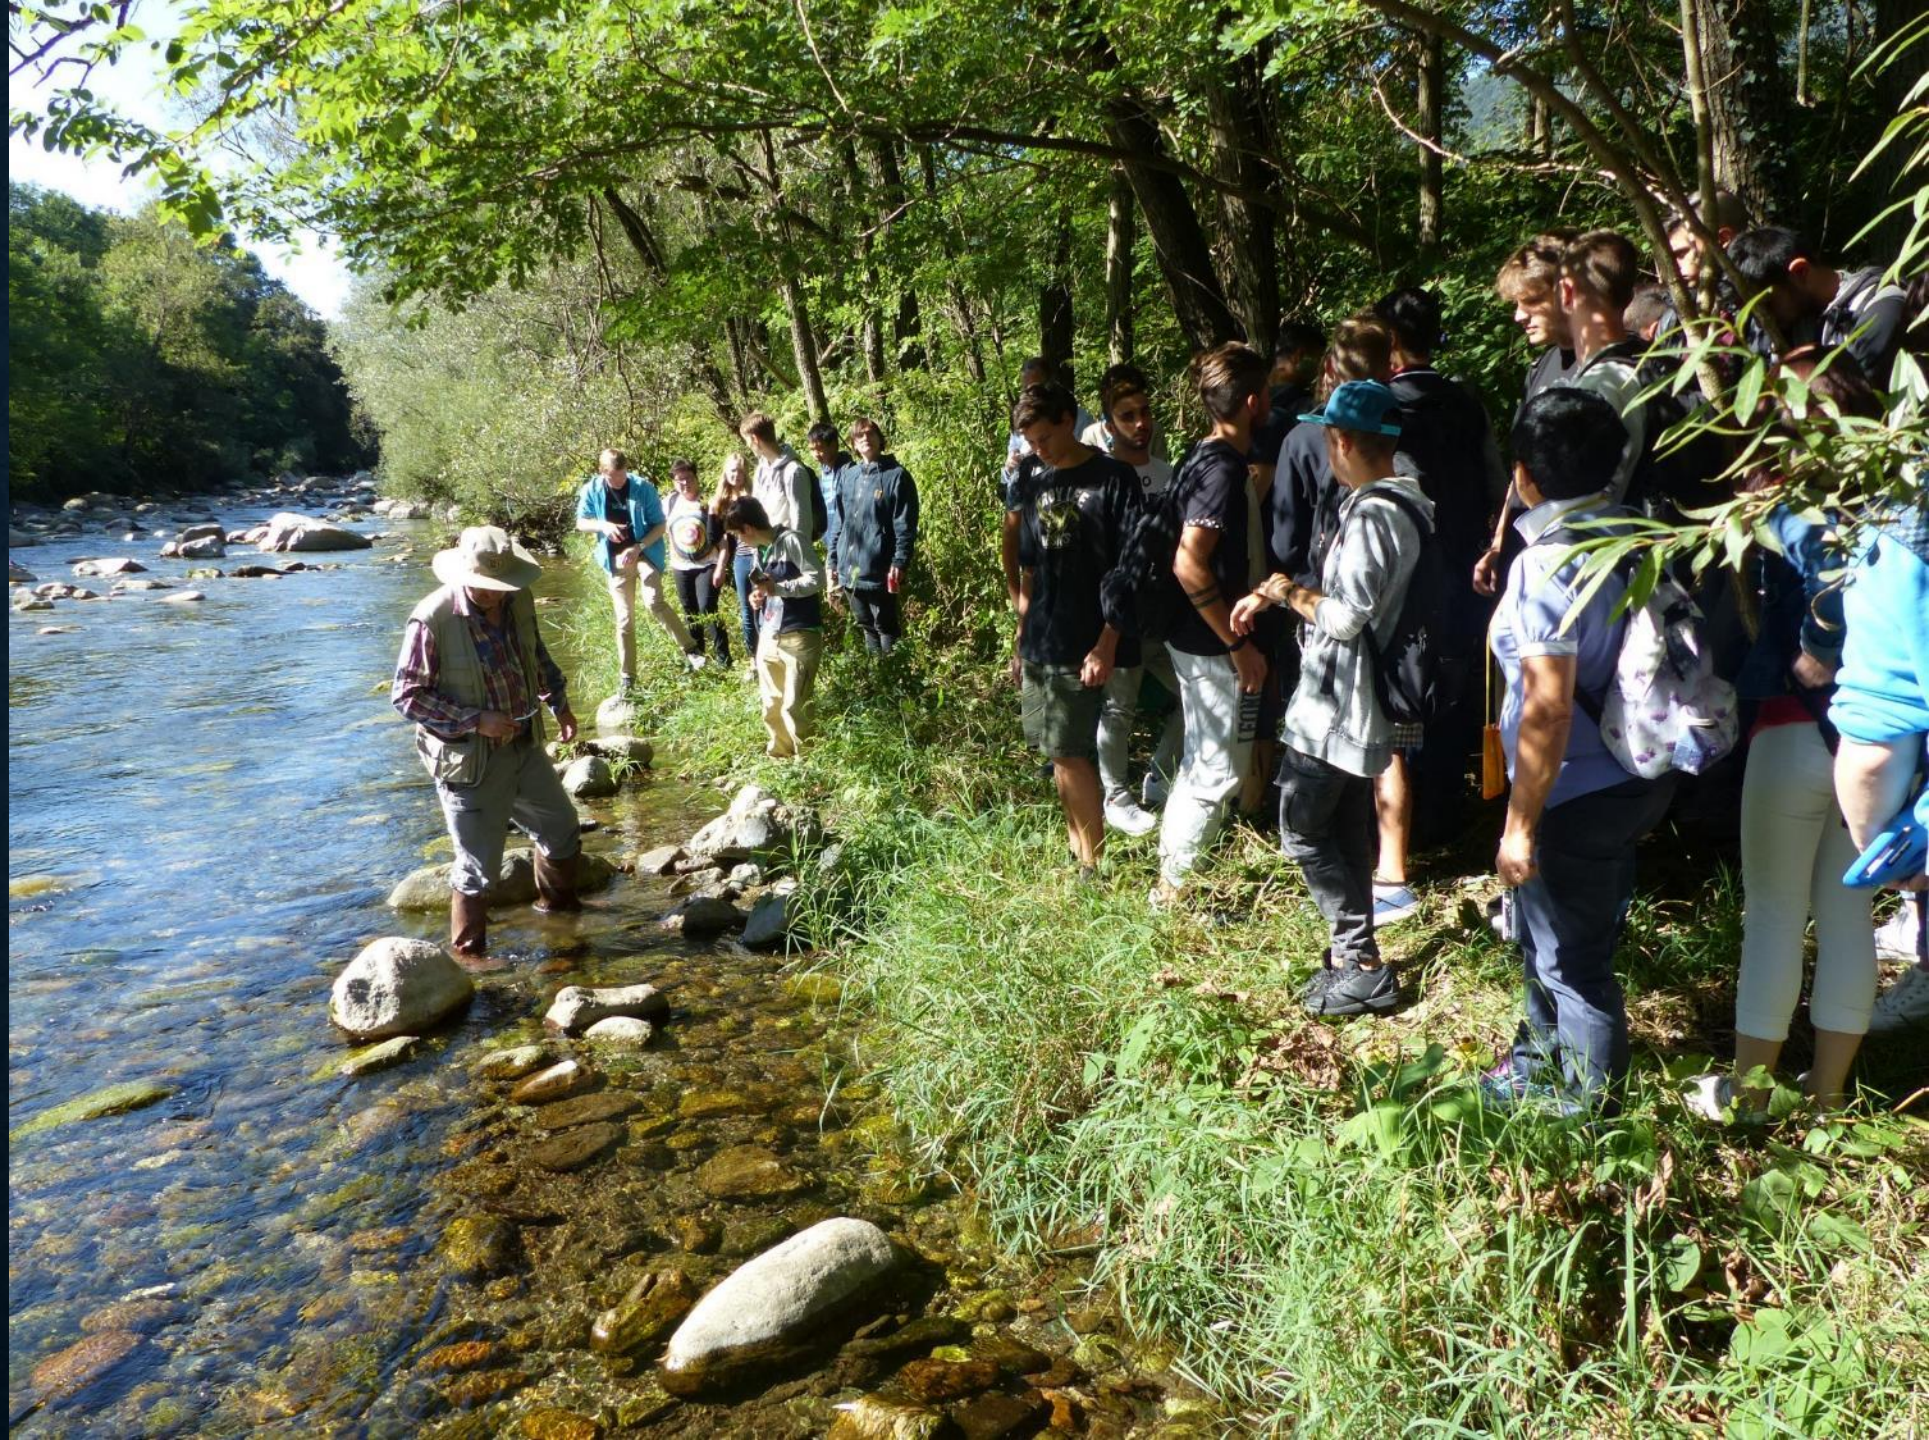



# Visiting Rassa, an old village.

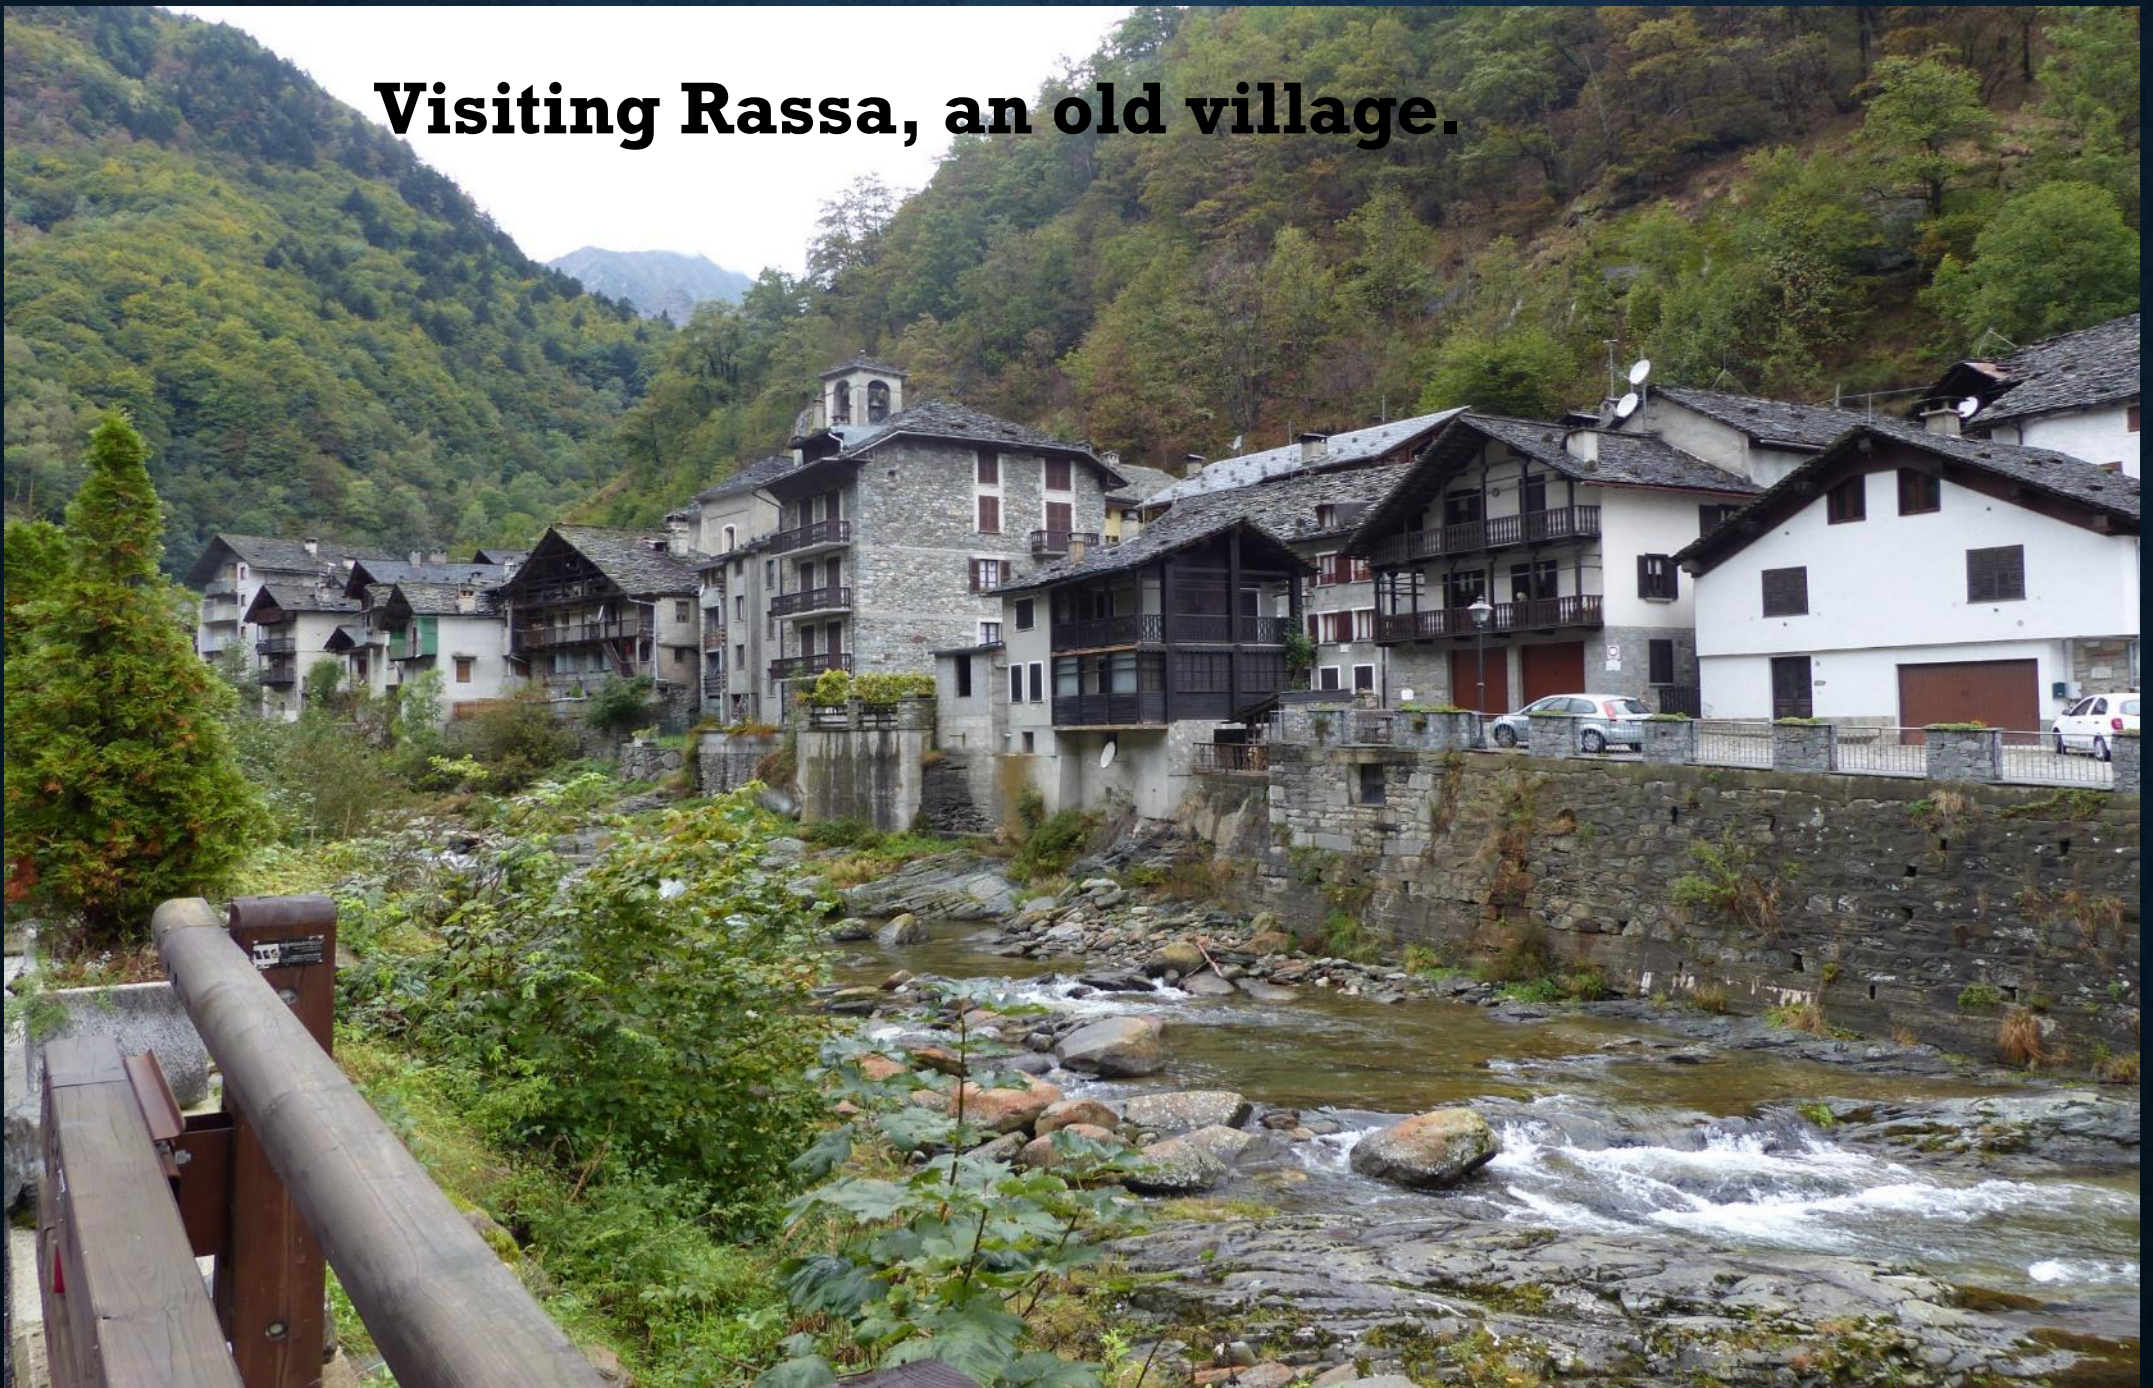



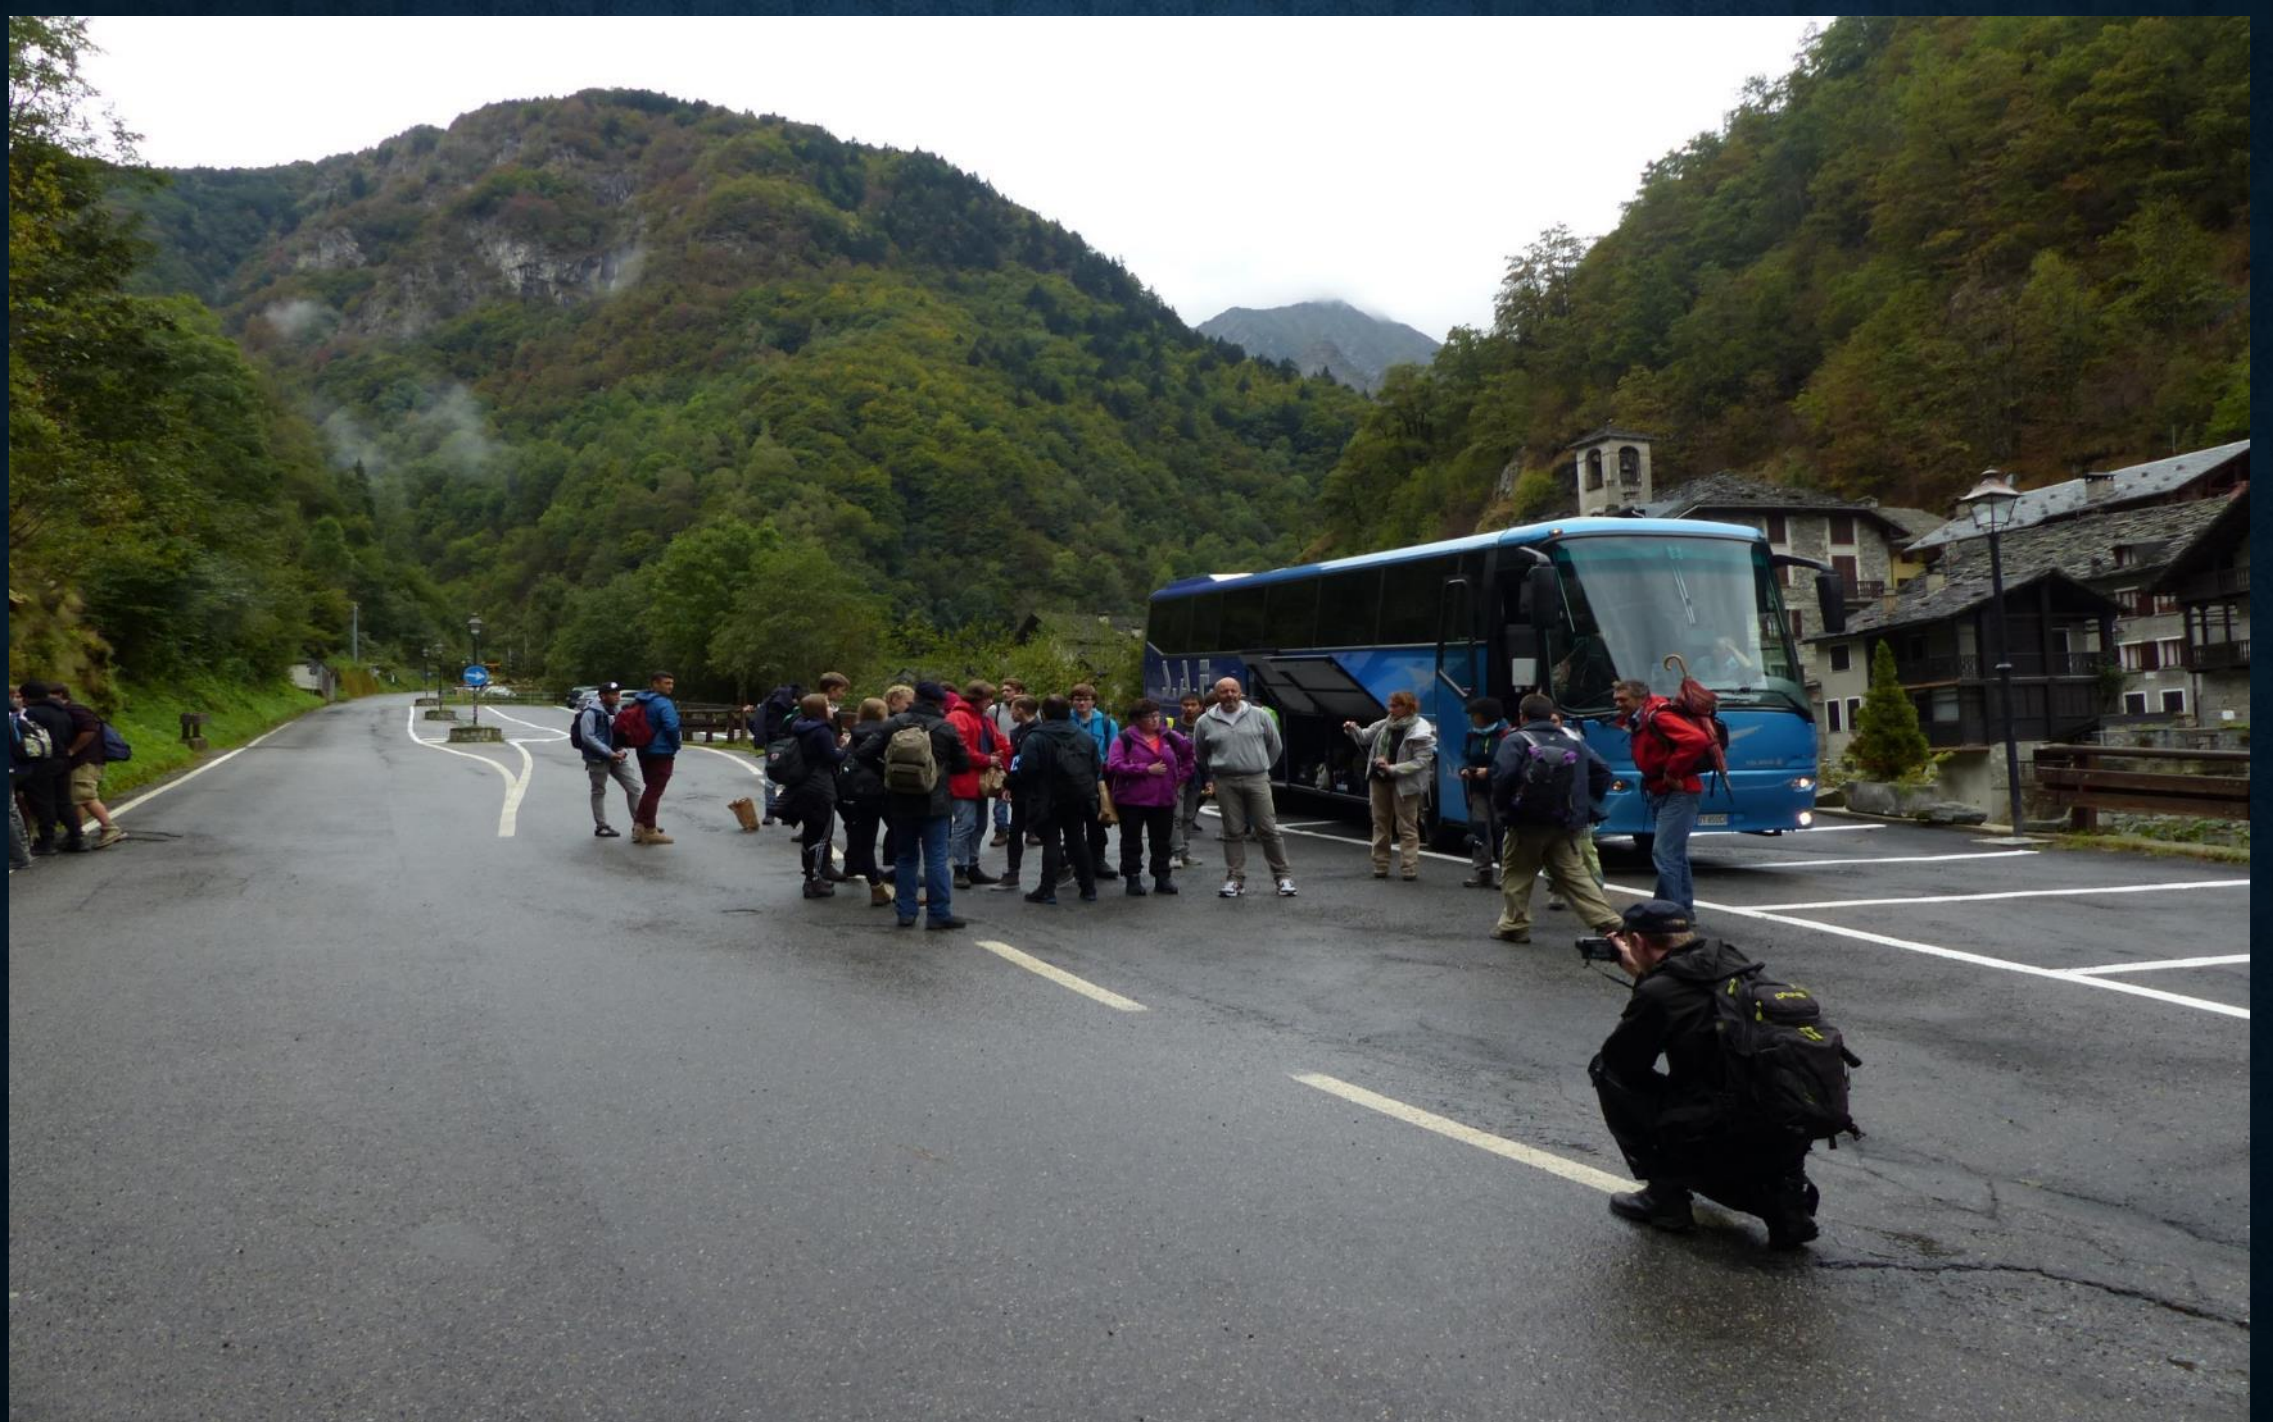



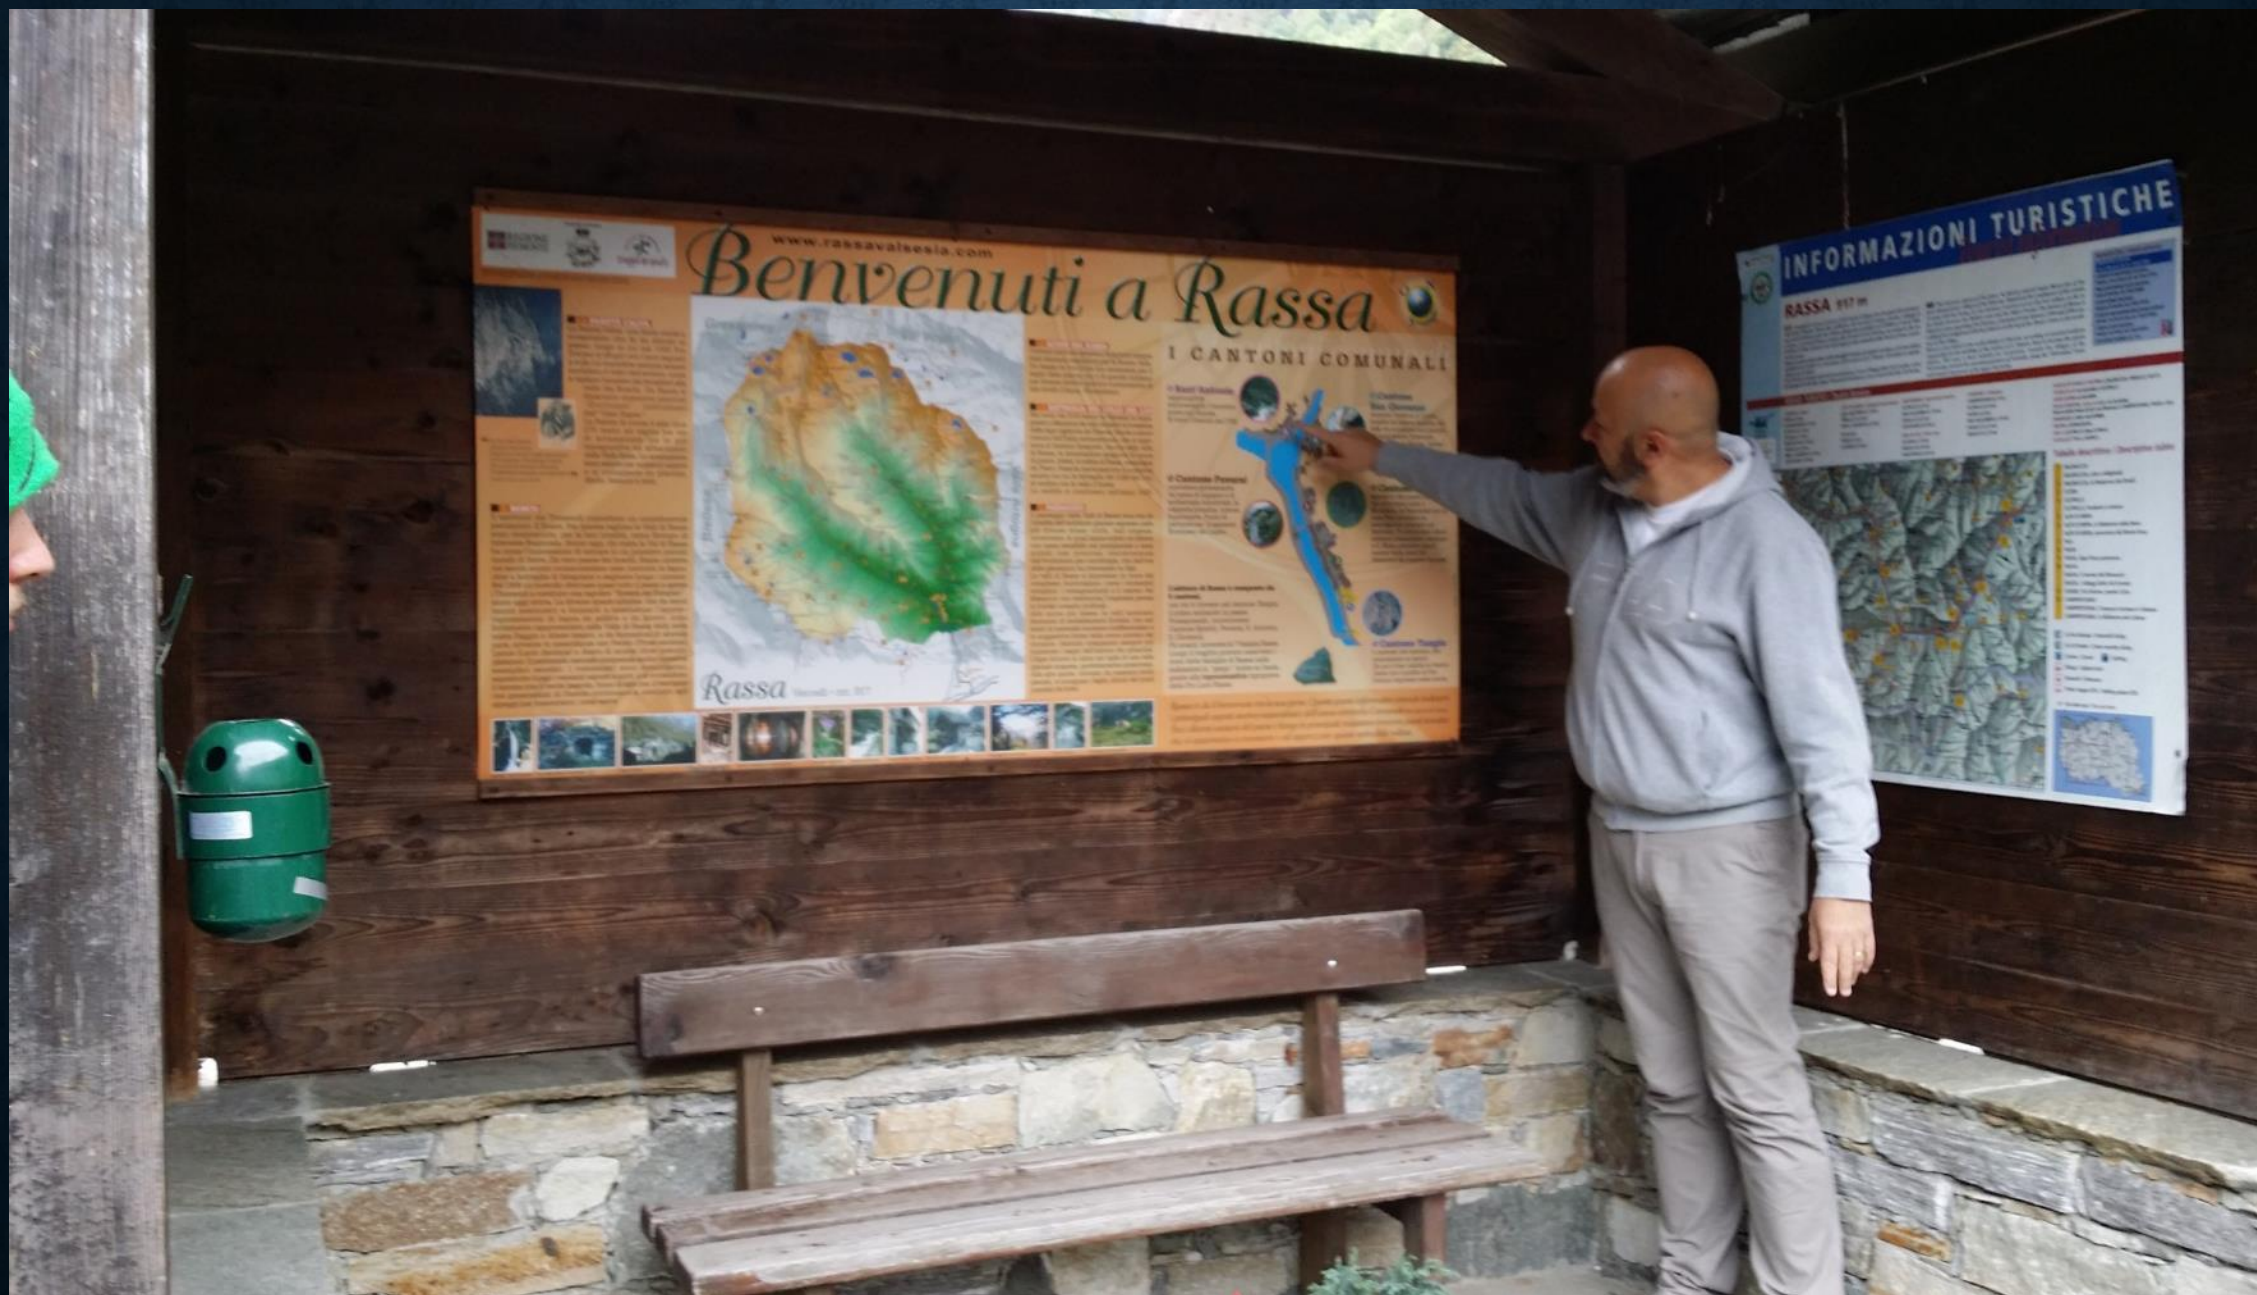



# Professor Marco Giardino, Turin University

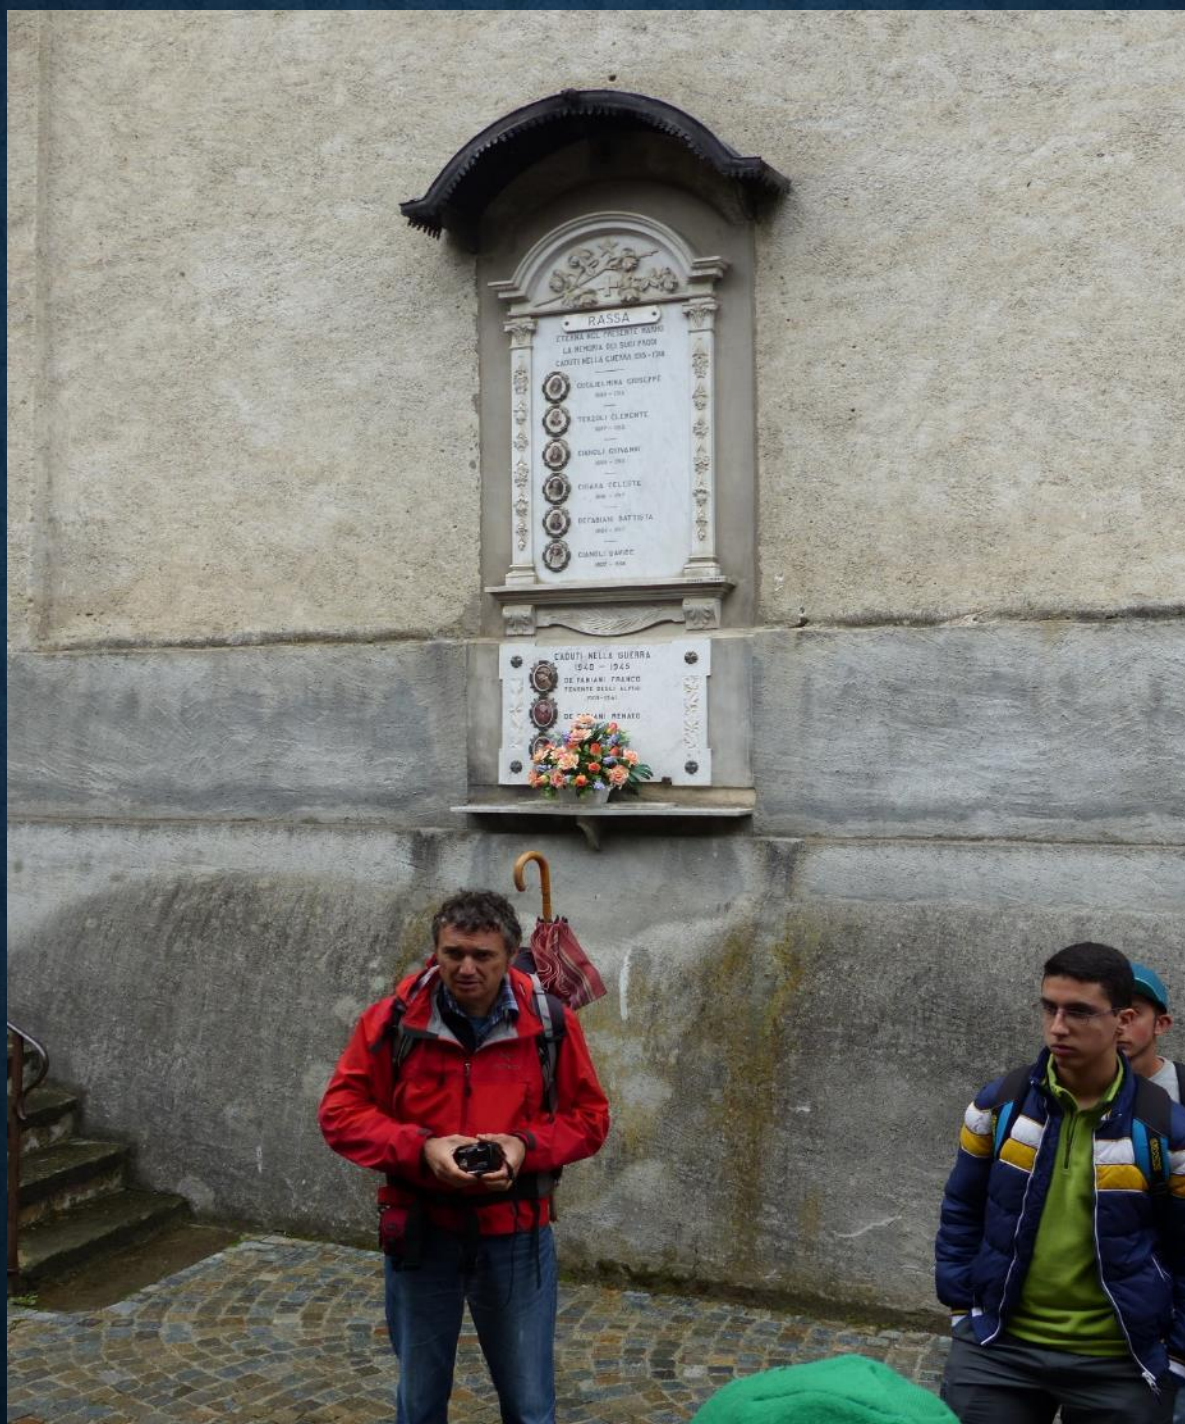



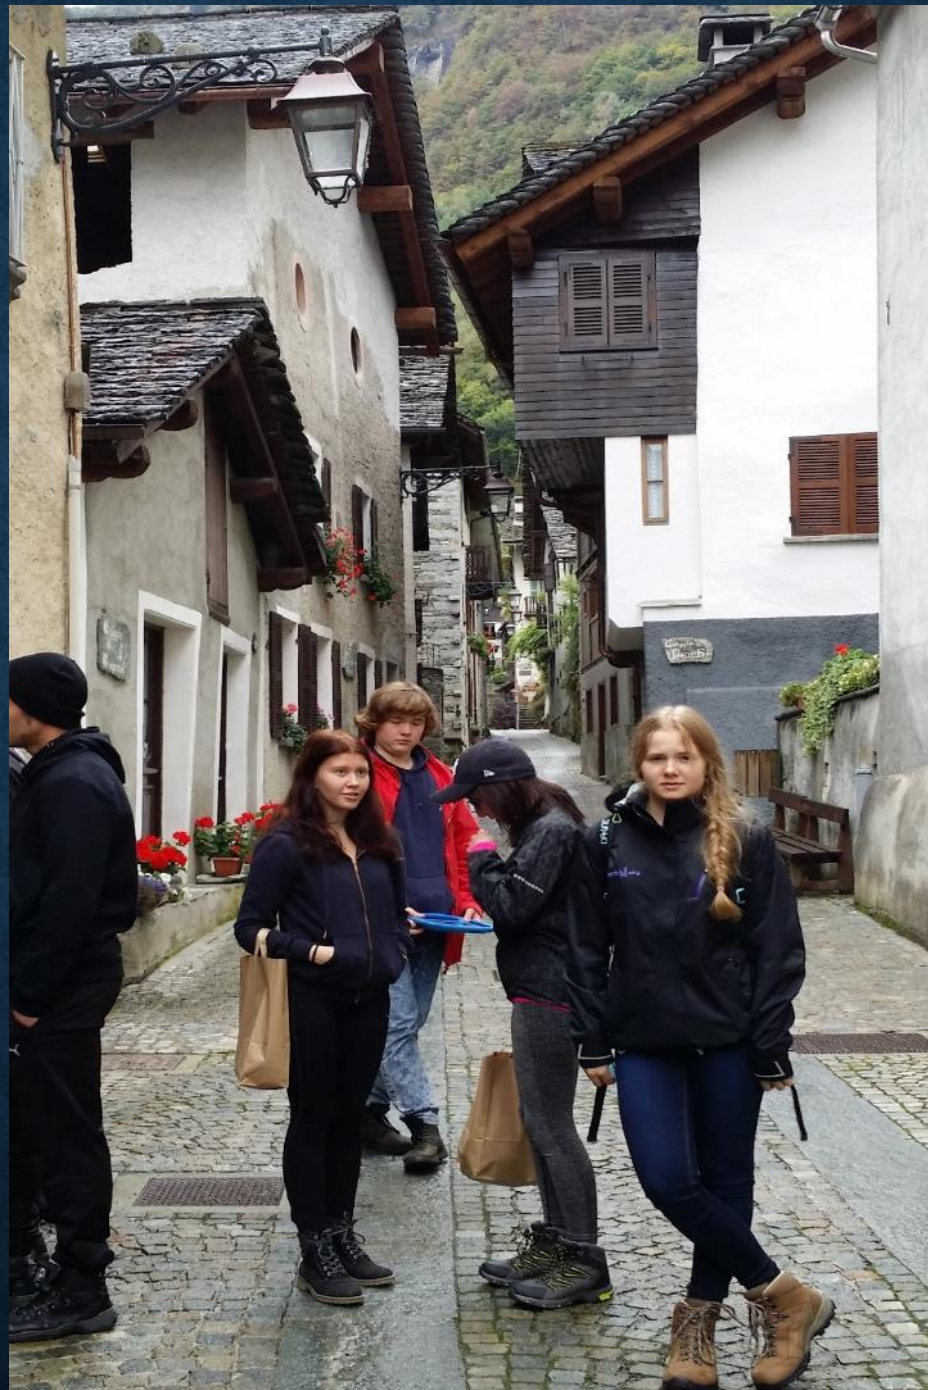



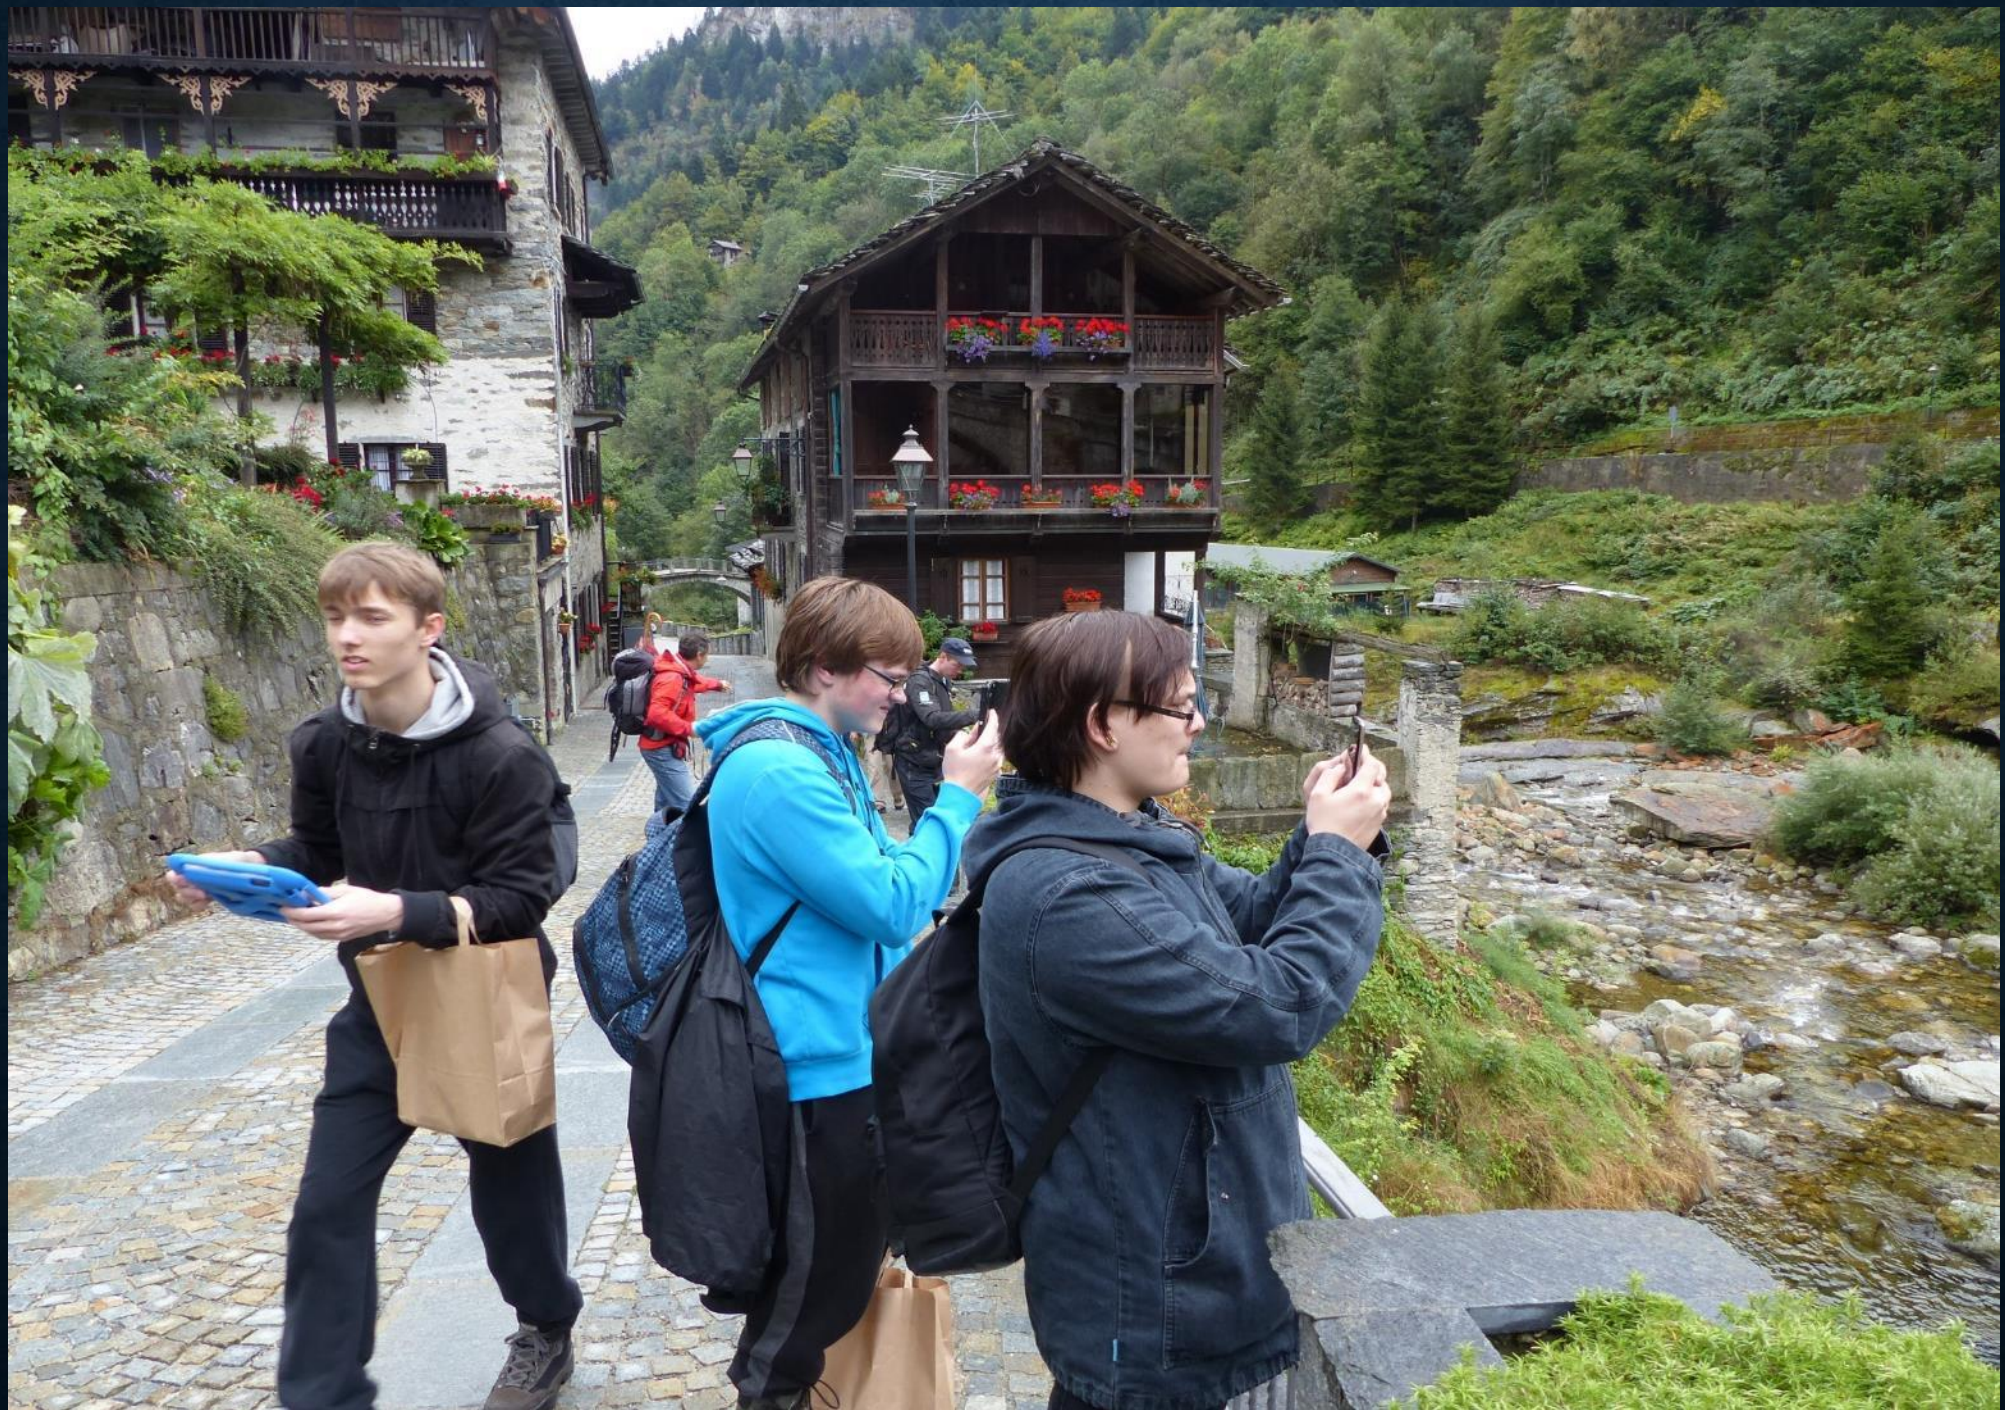



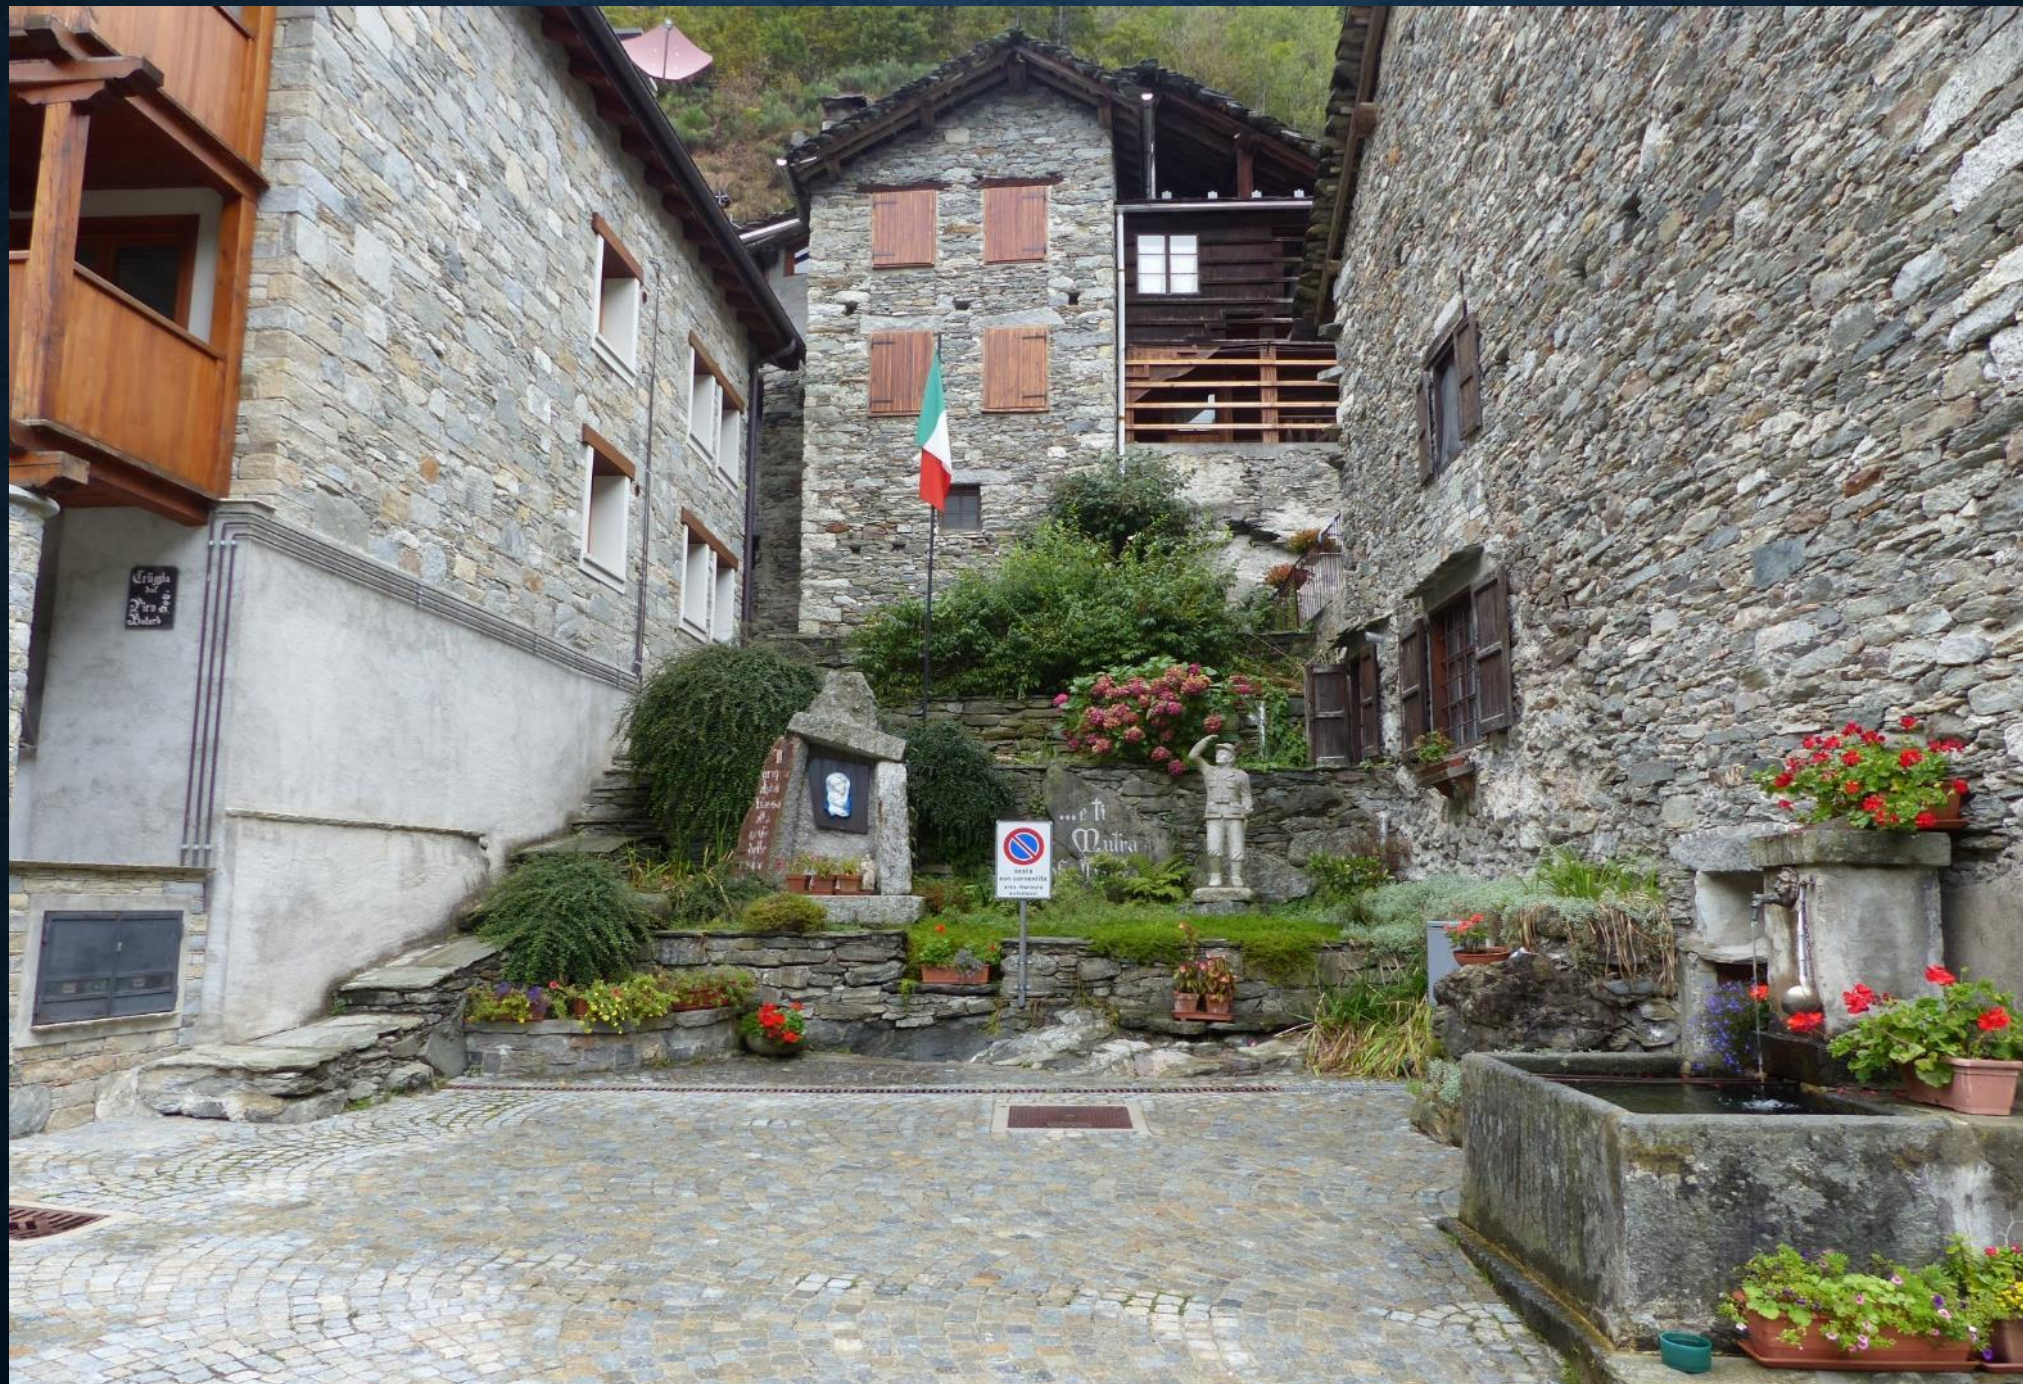



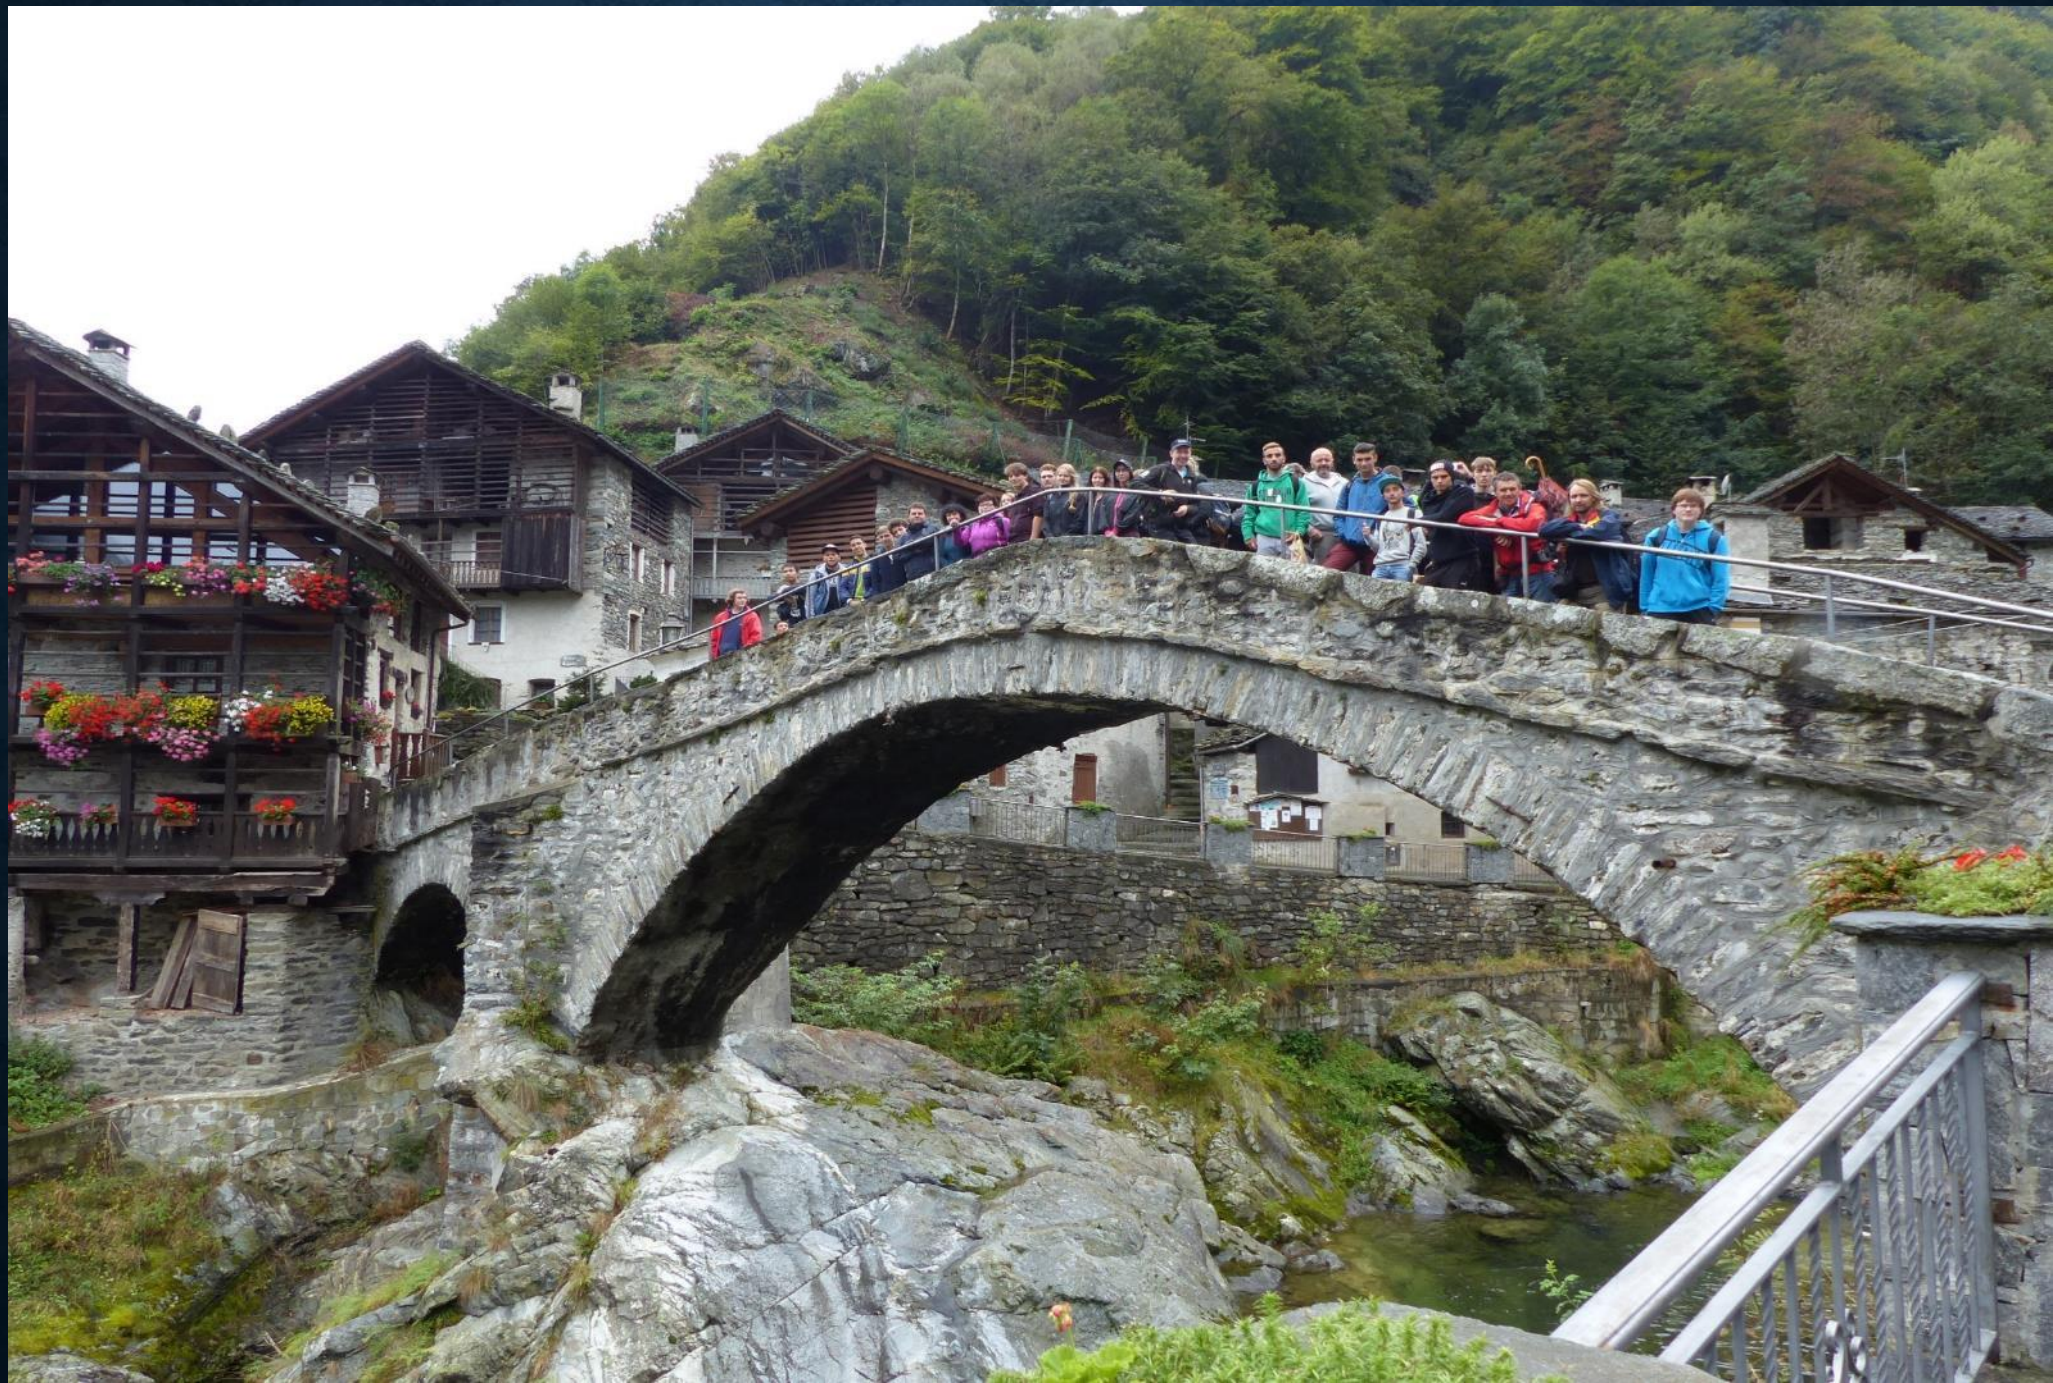



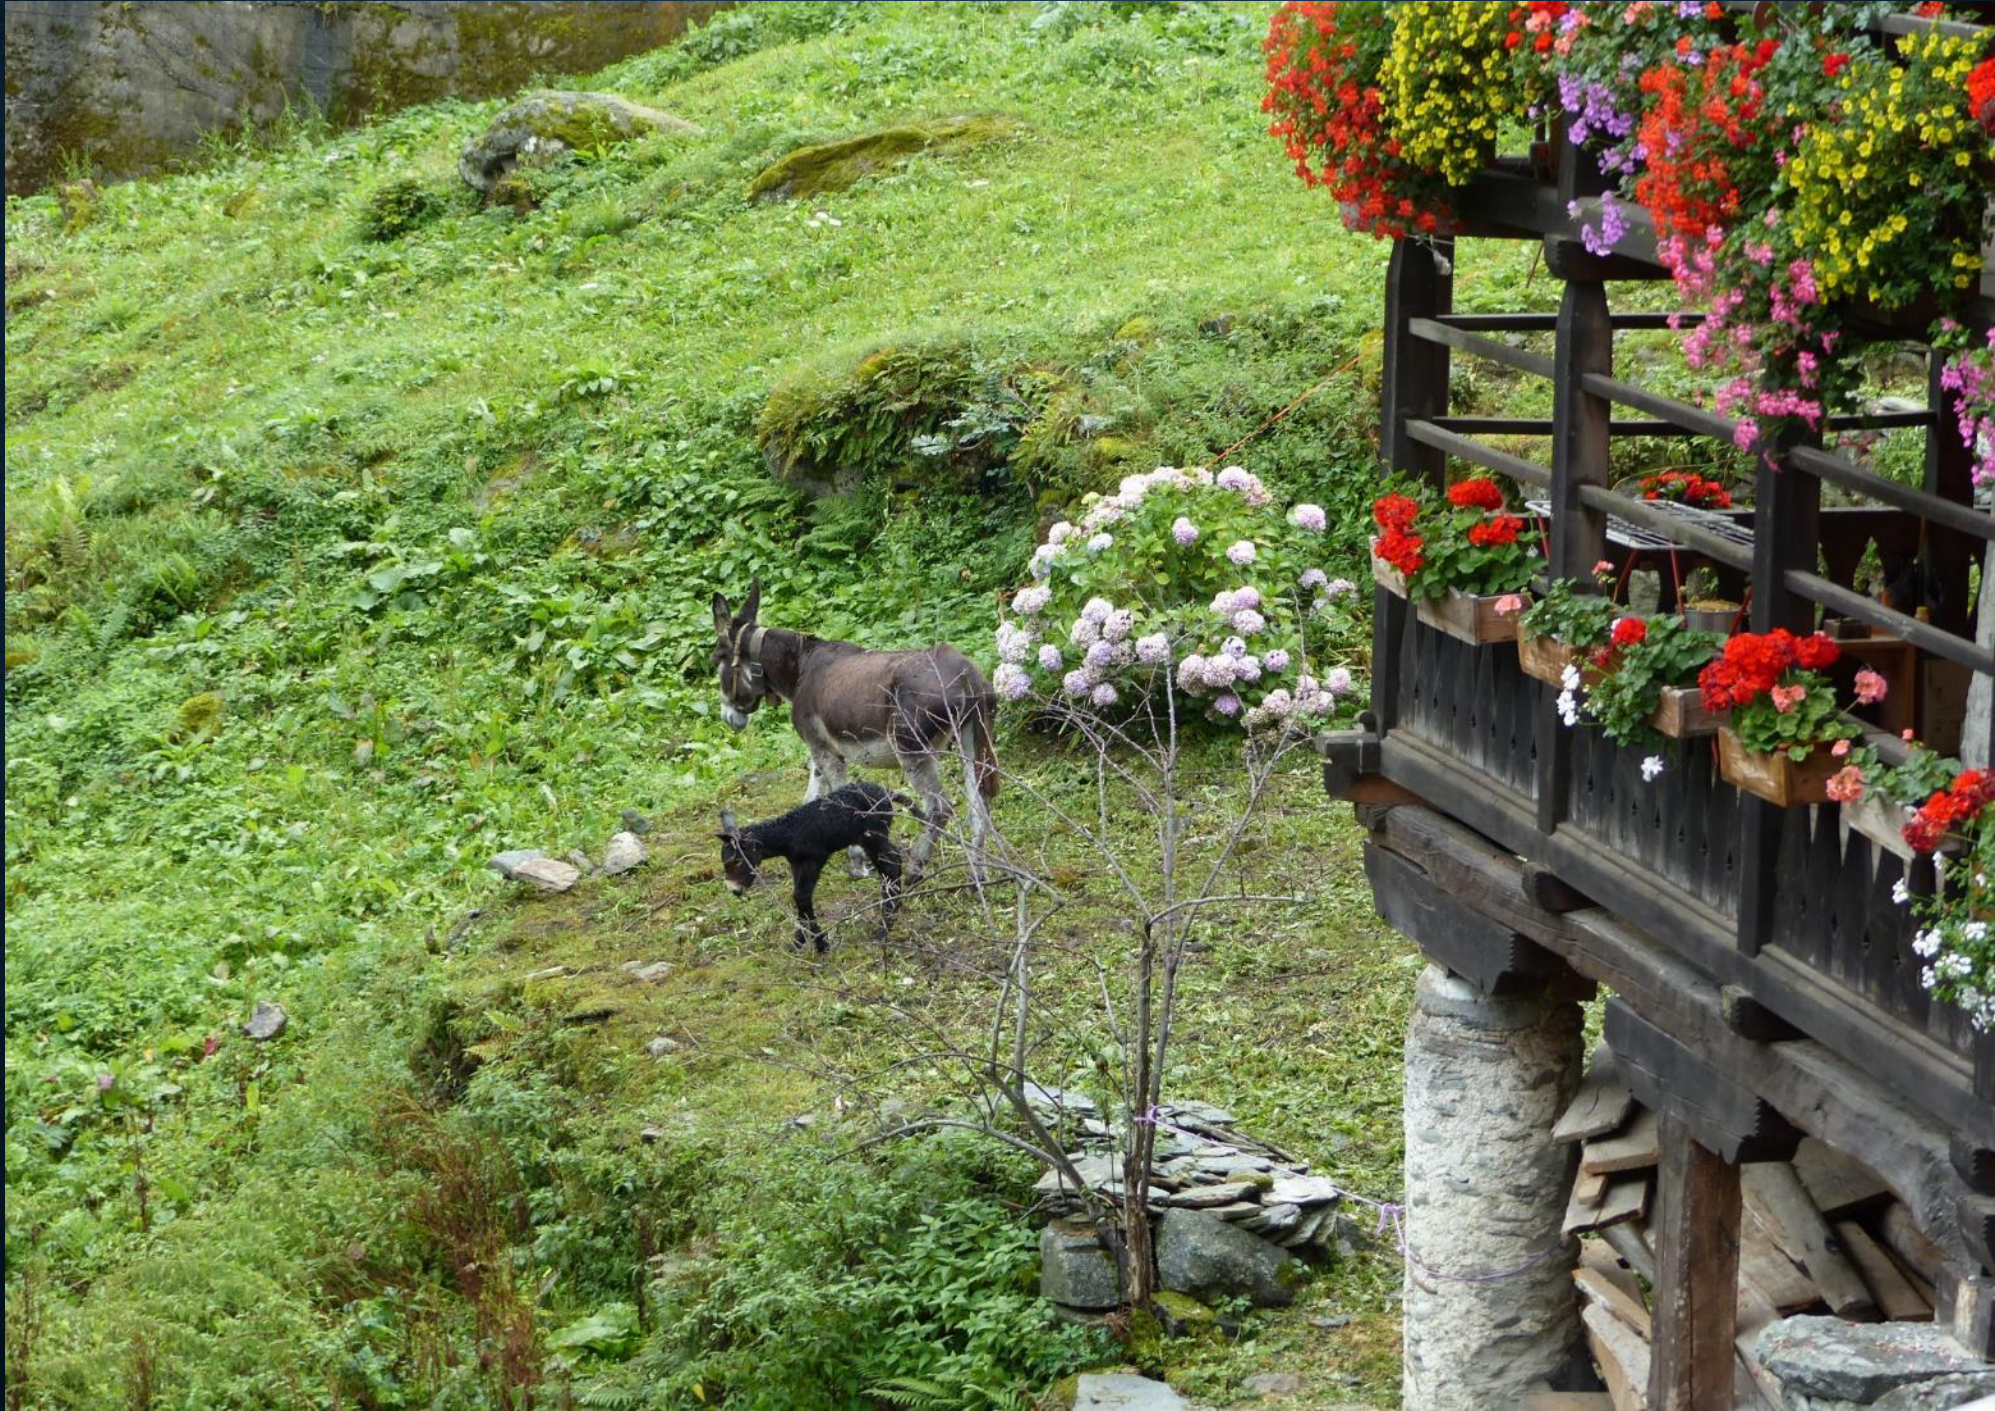



# Edoardo Dellarole, director of Sesia Val Grande Geopark

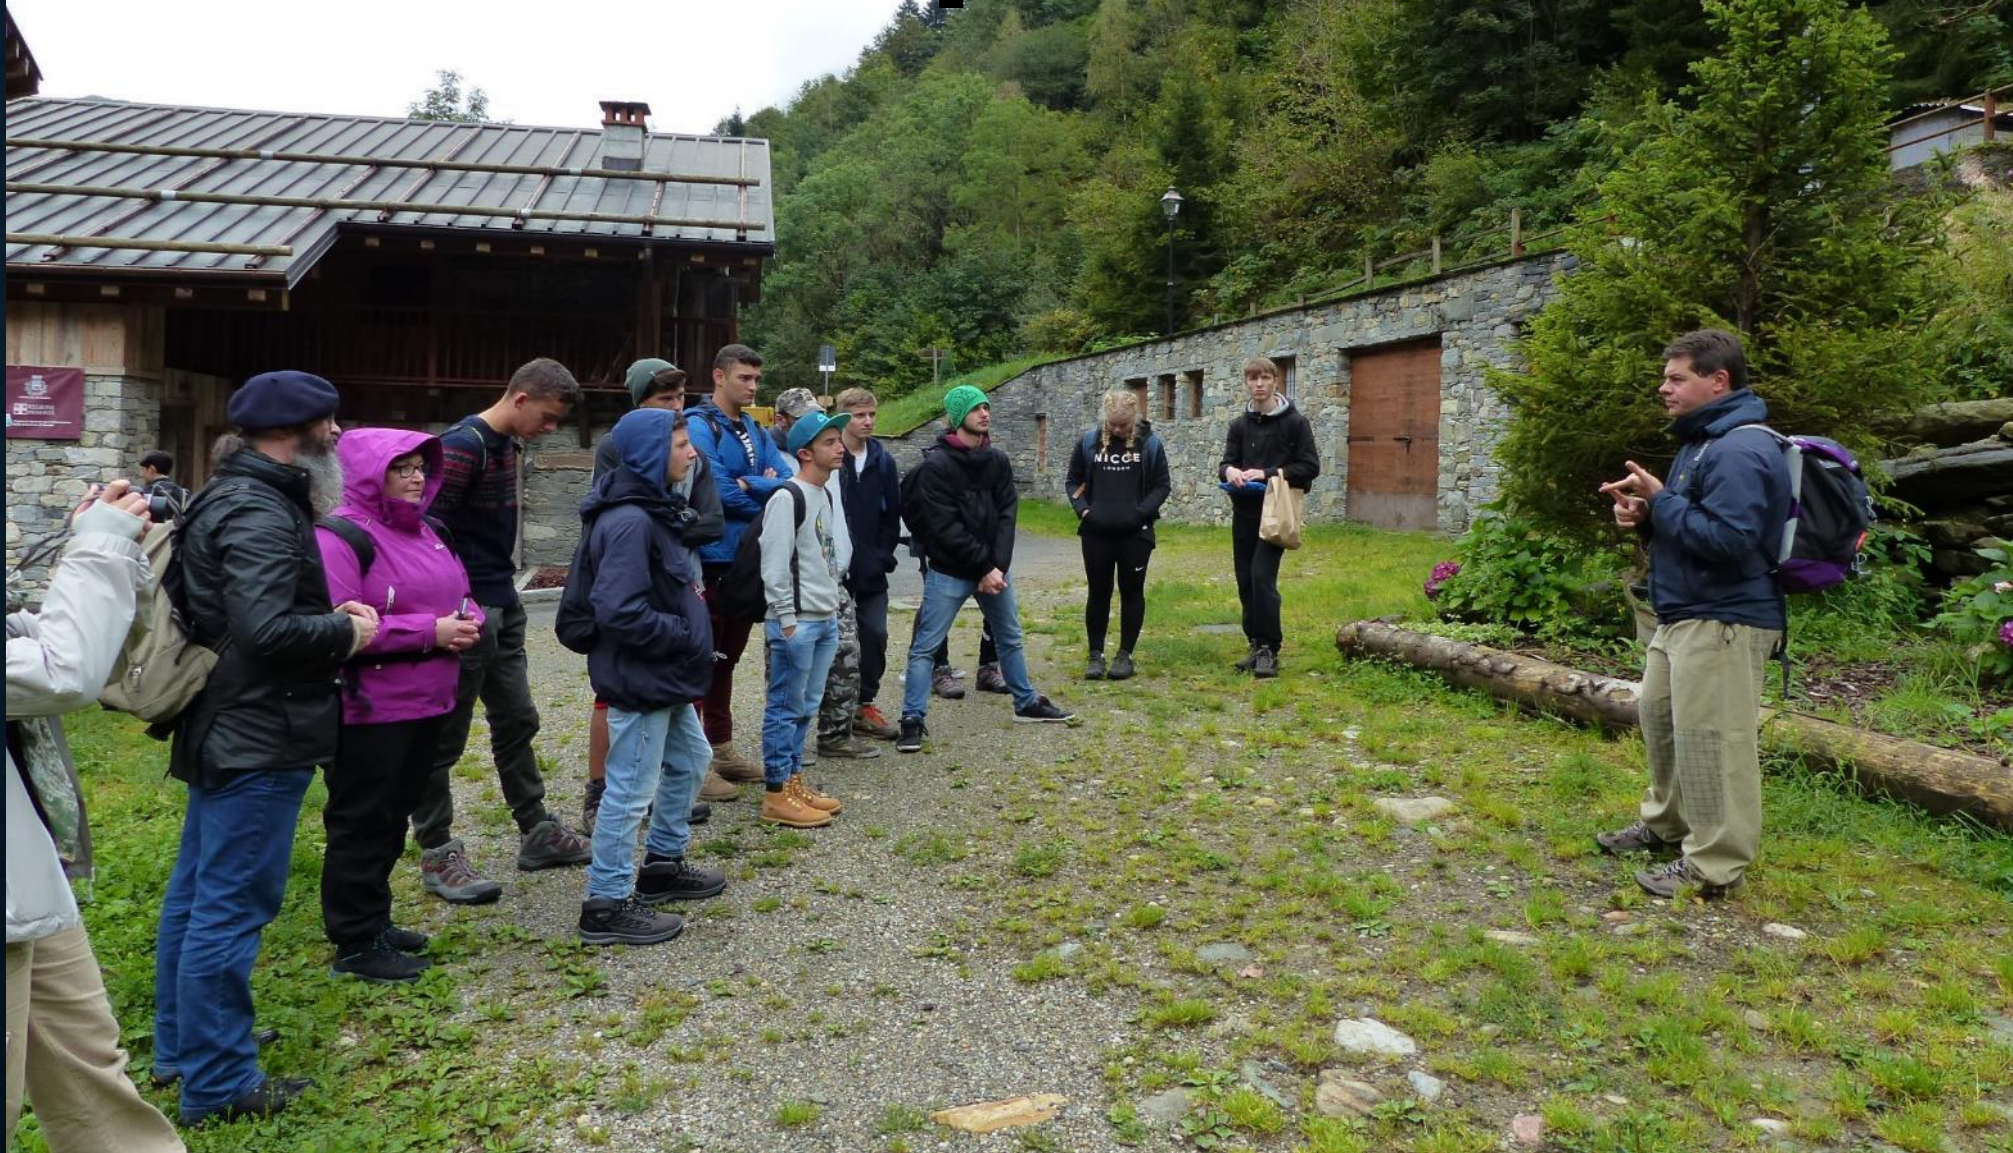



## Visiting the local museum

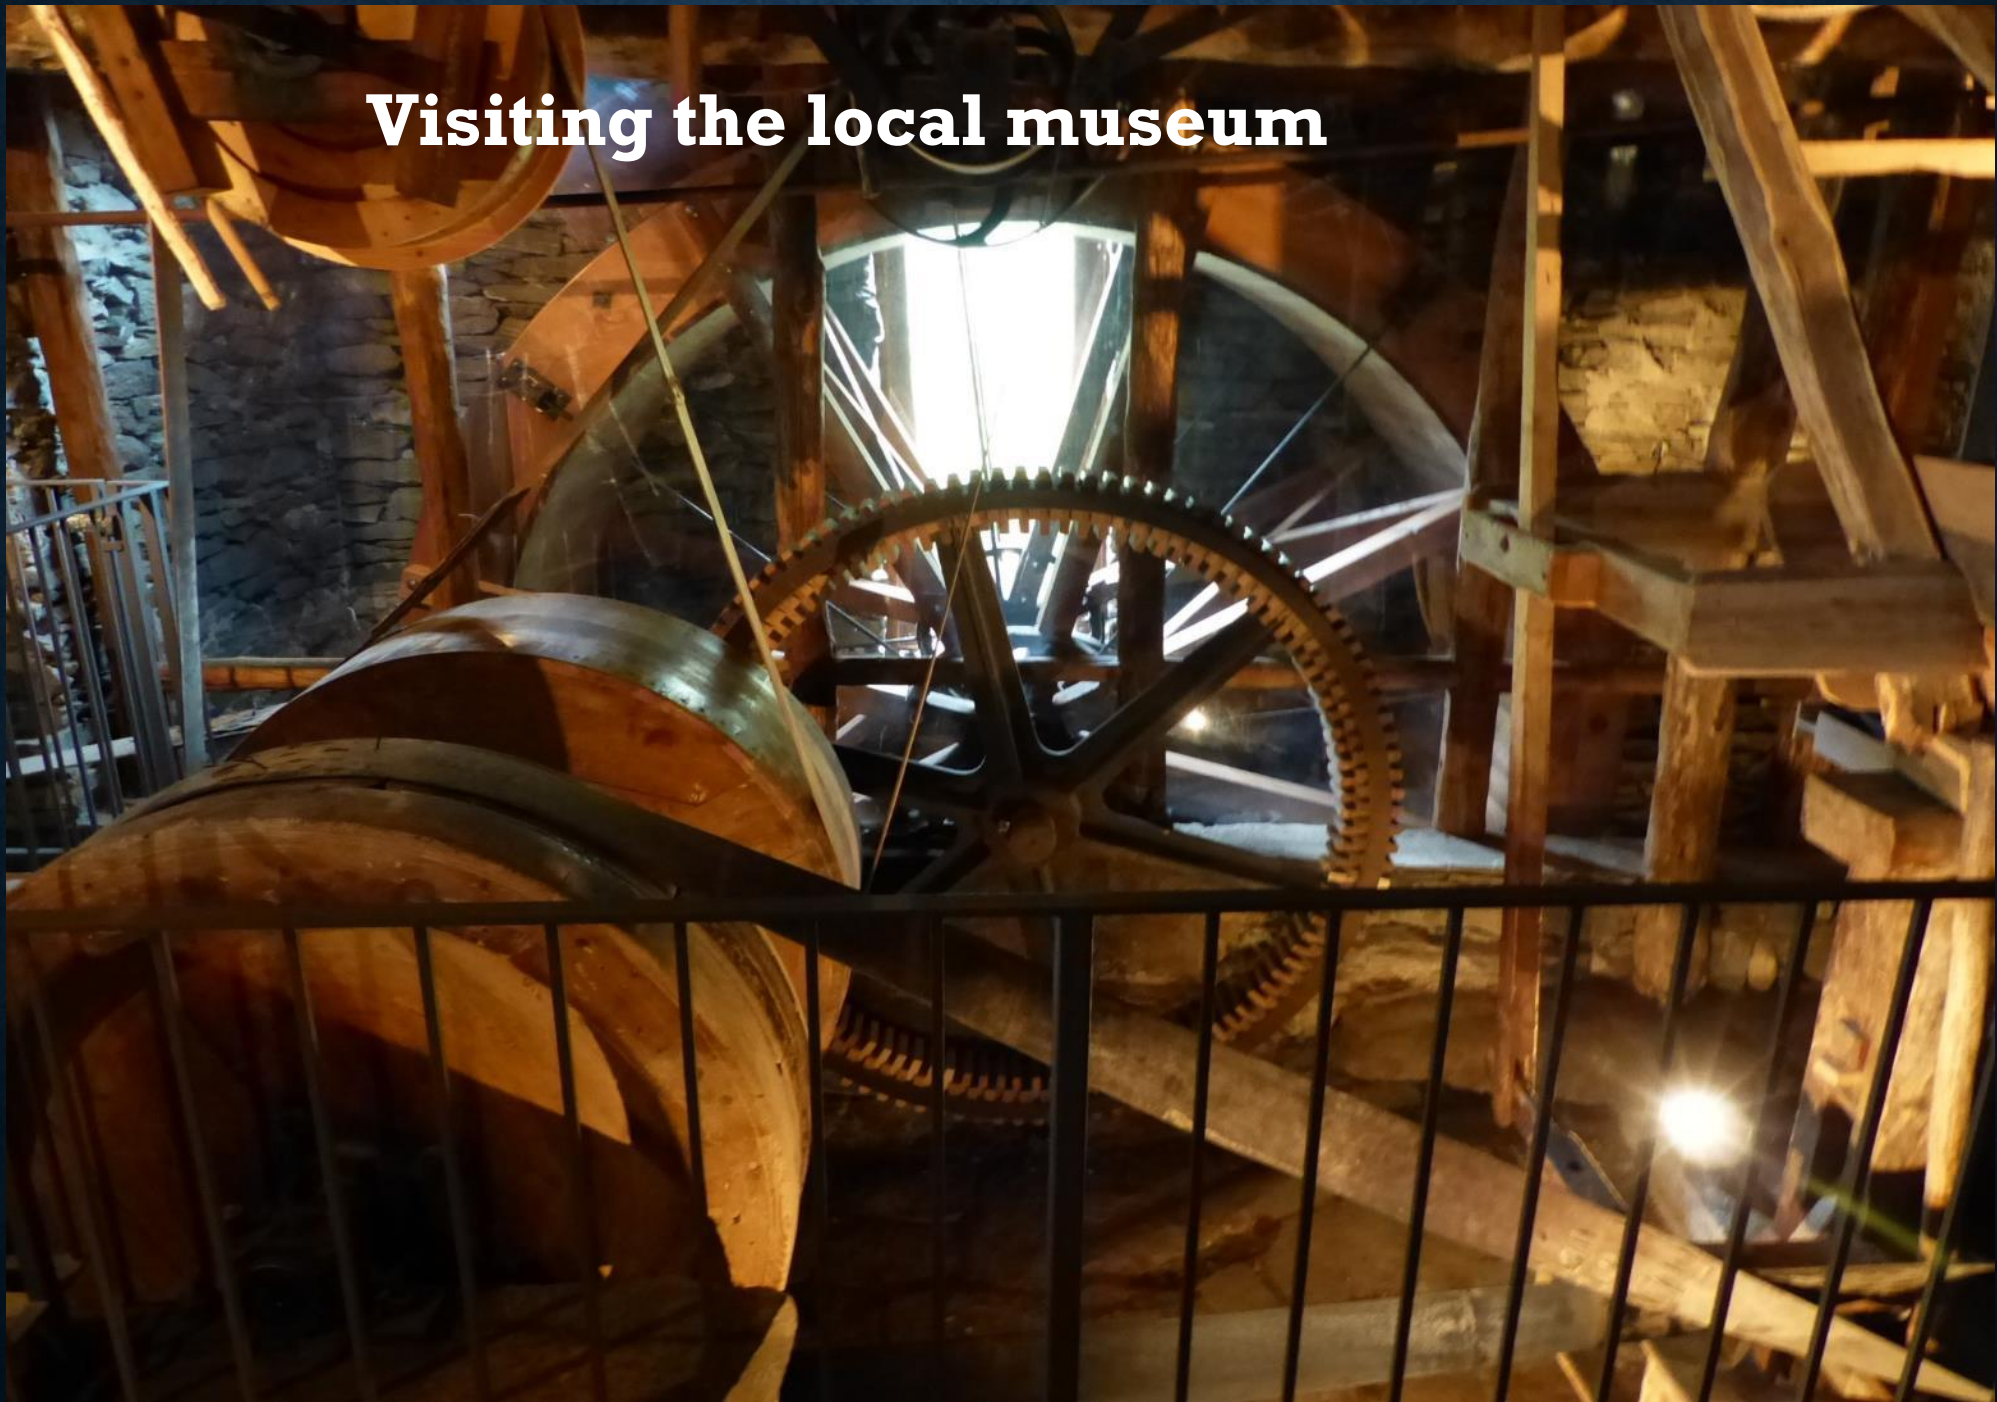



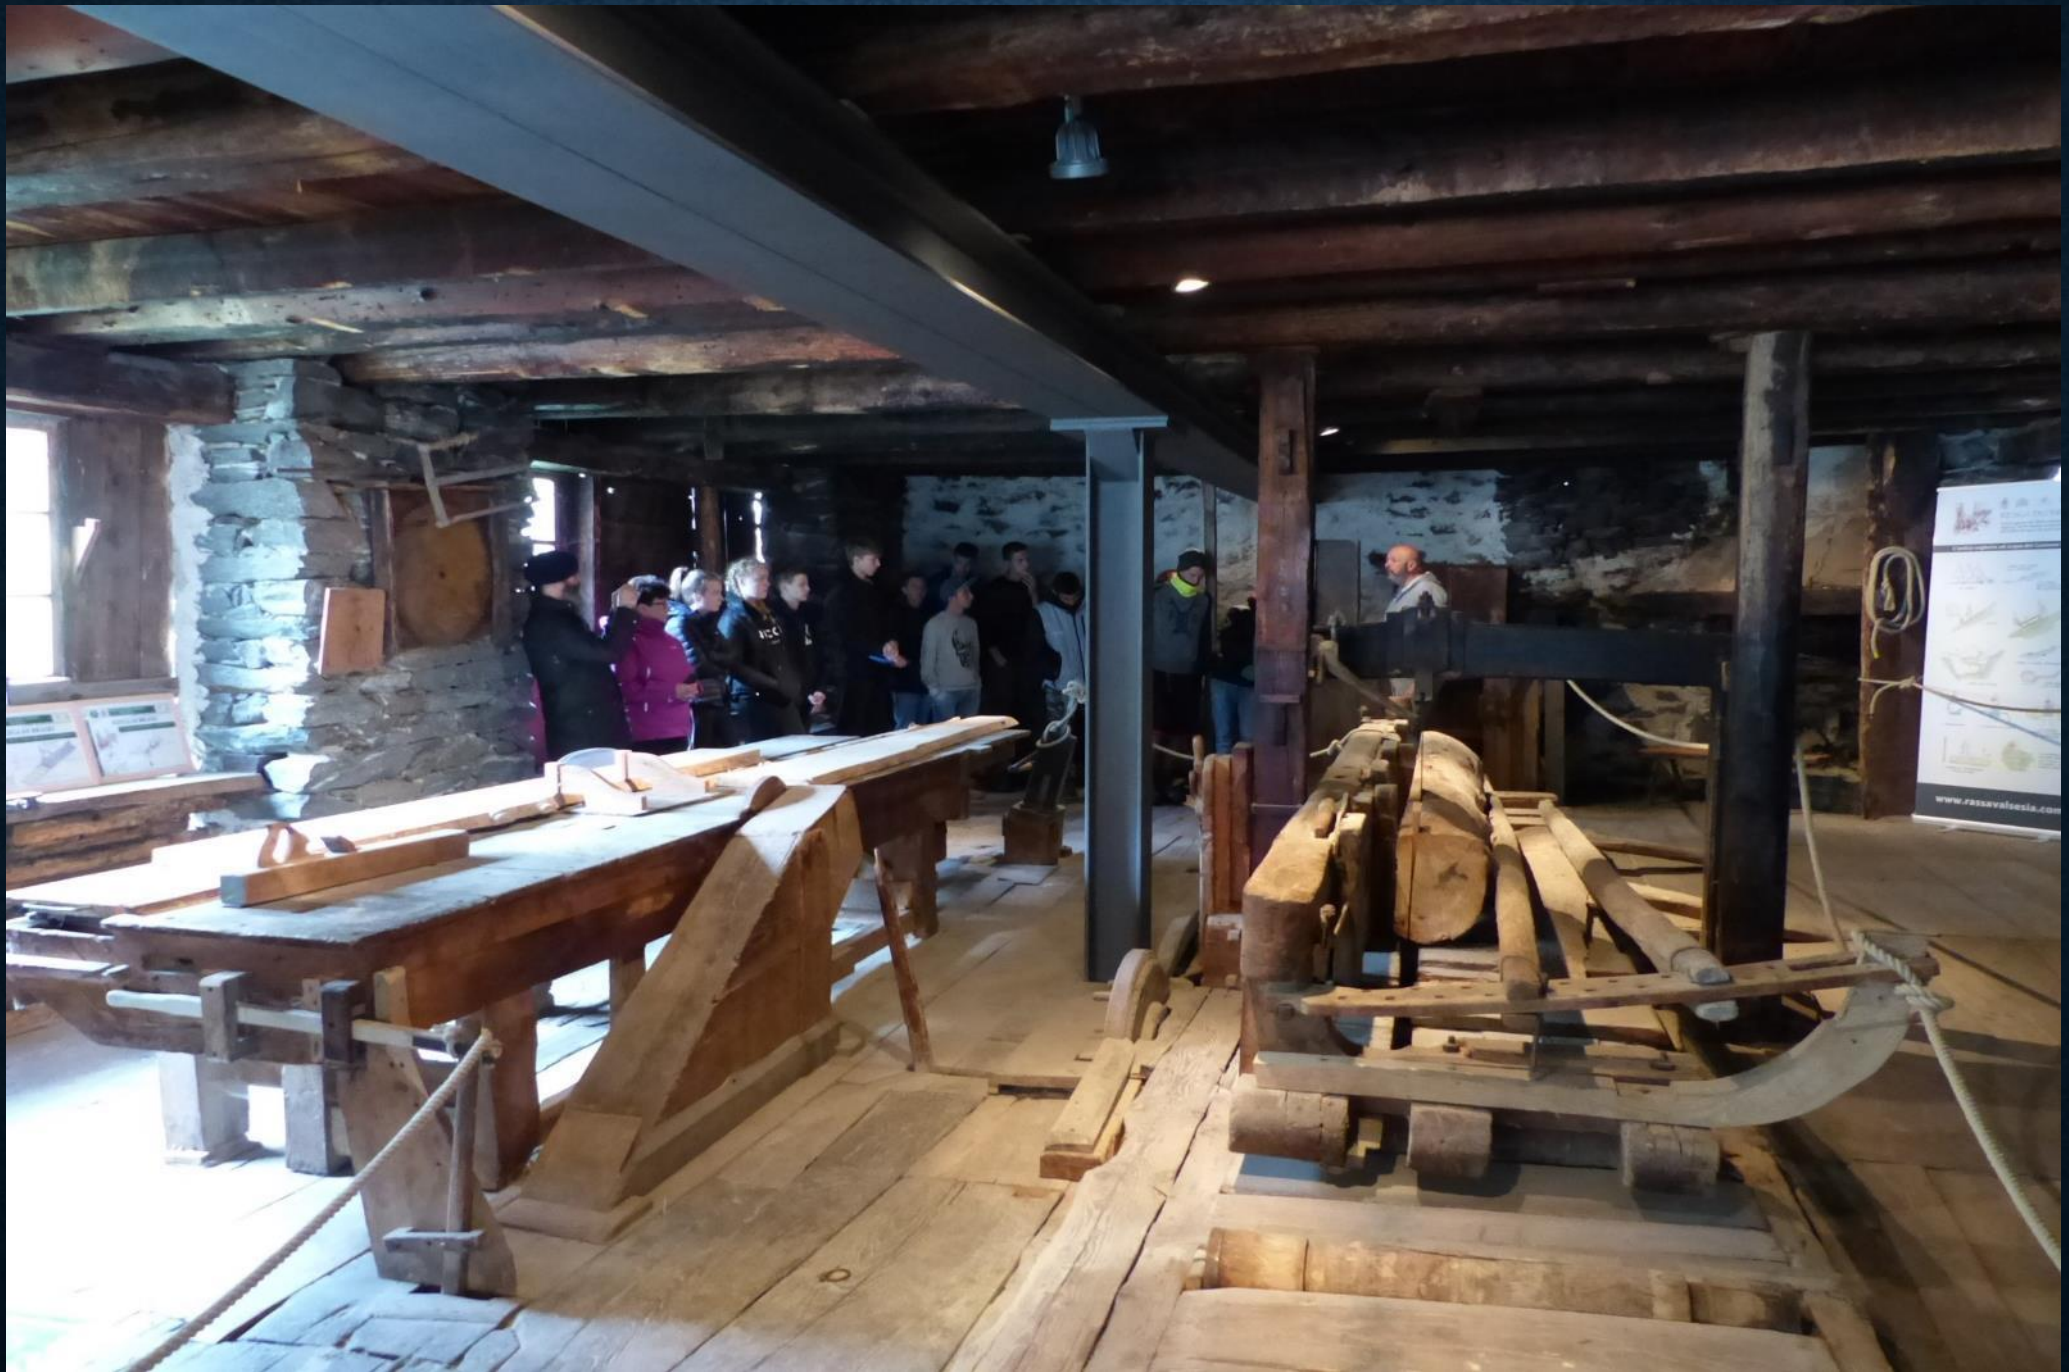



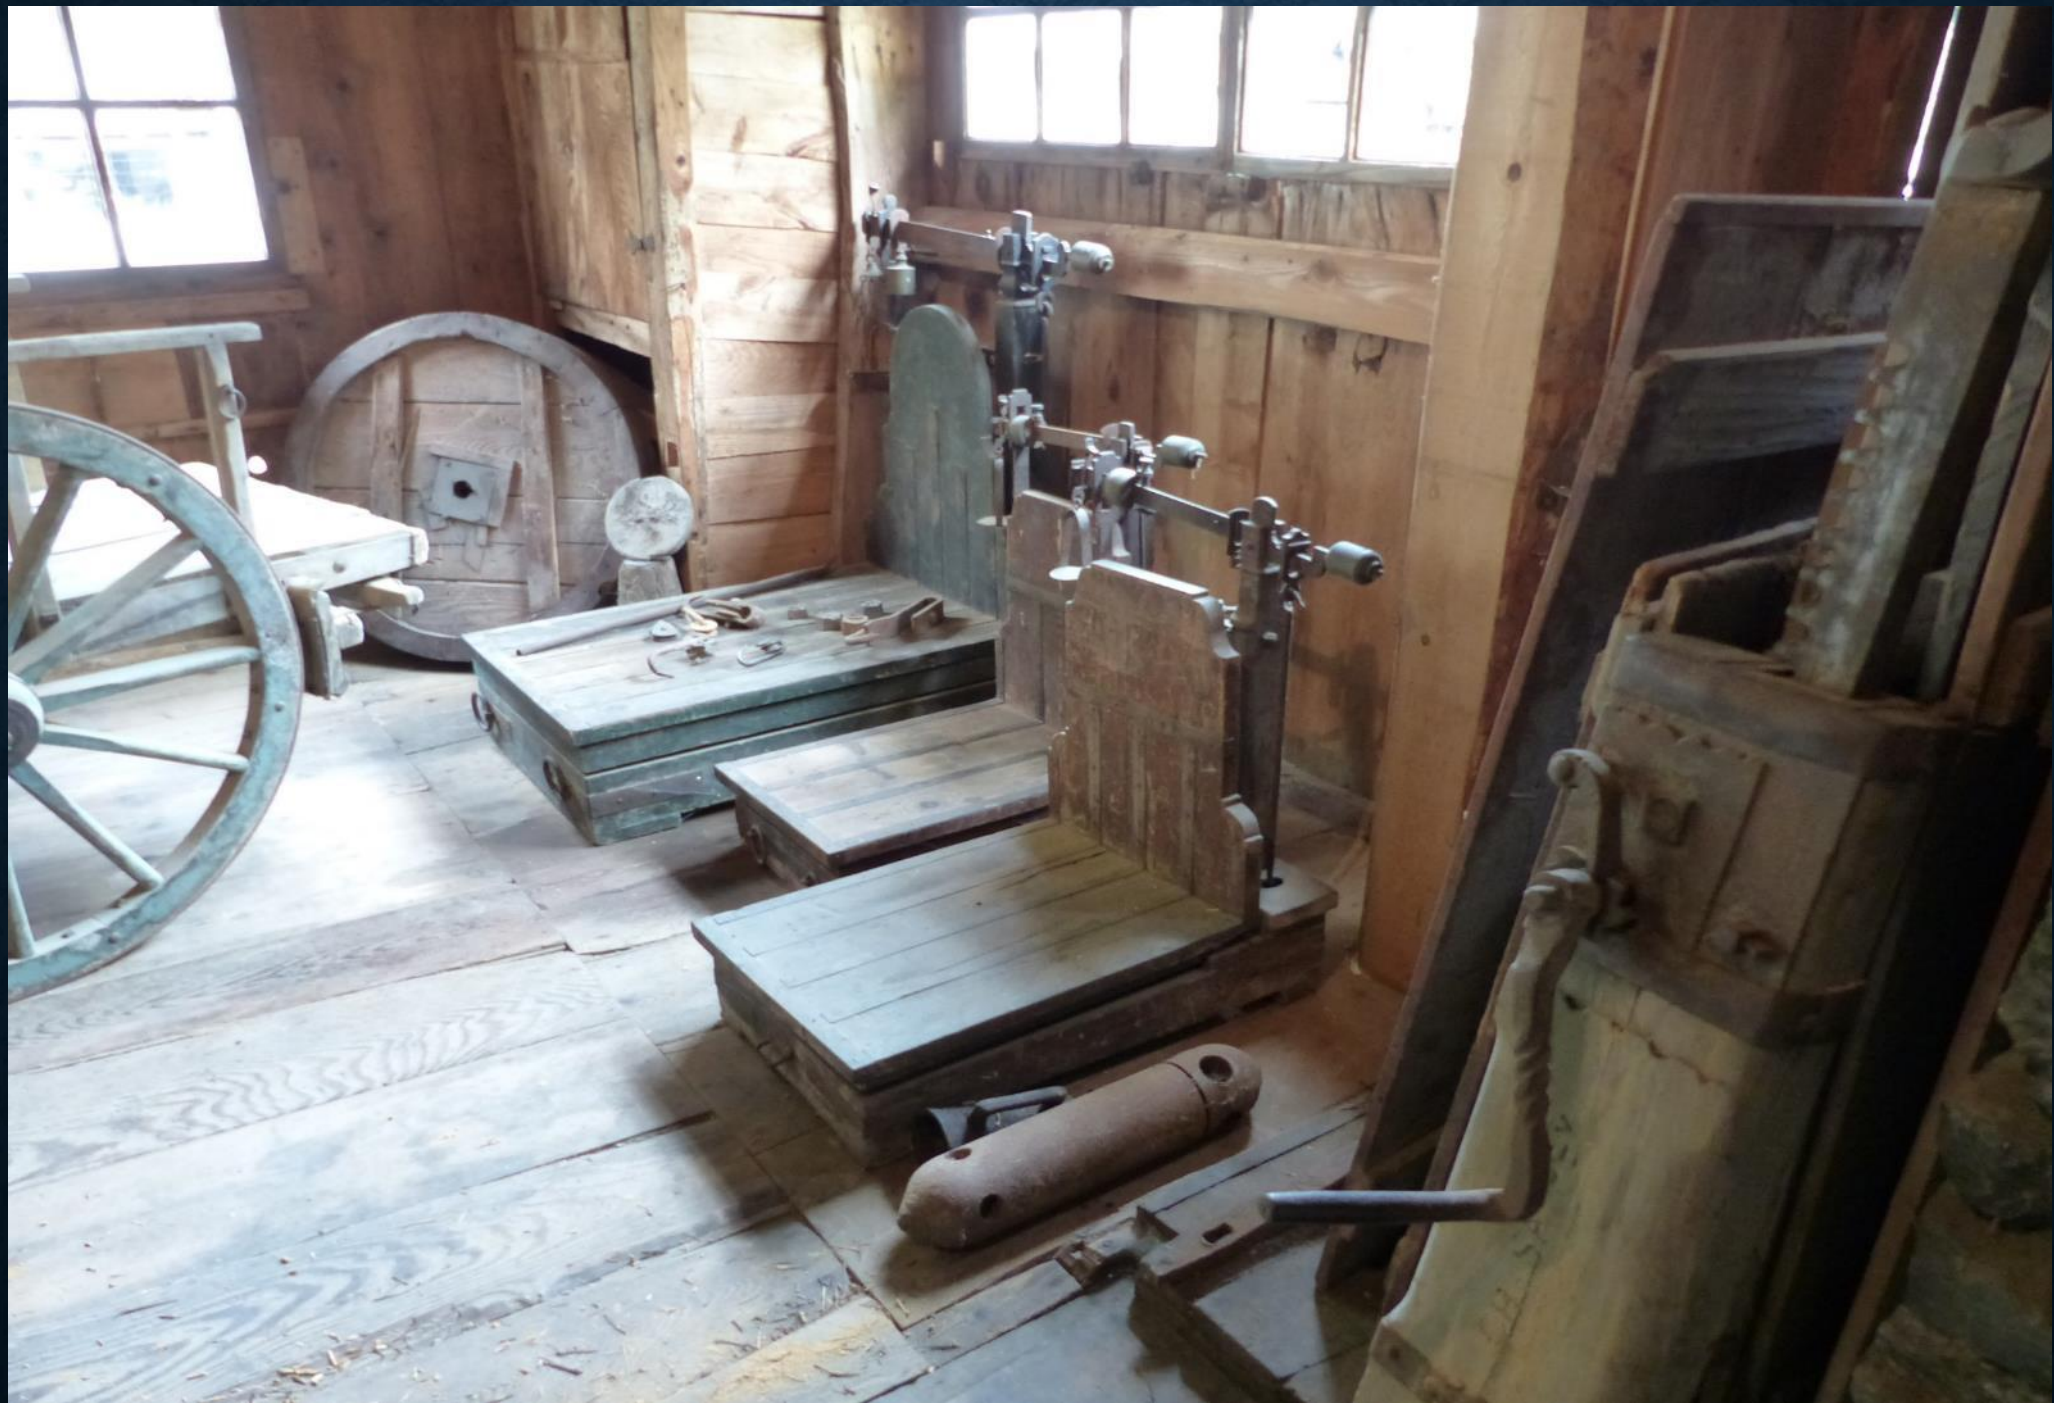



**The cattle was taken back  
to the farm from the mountains.**

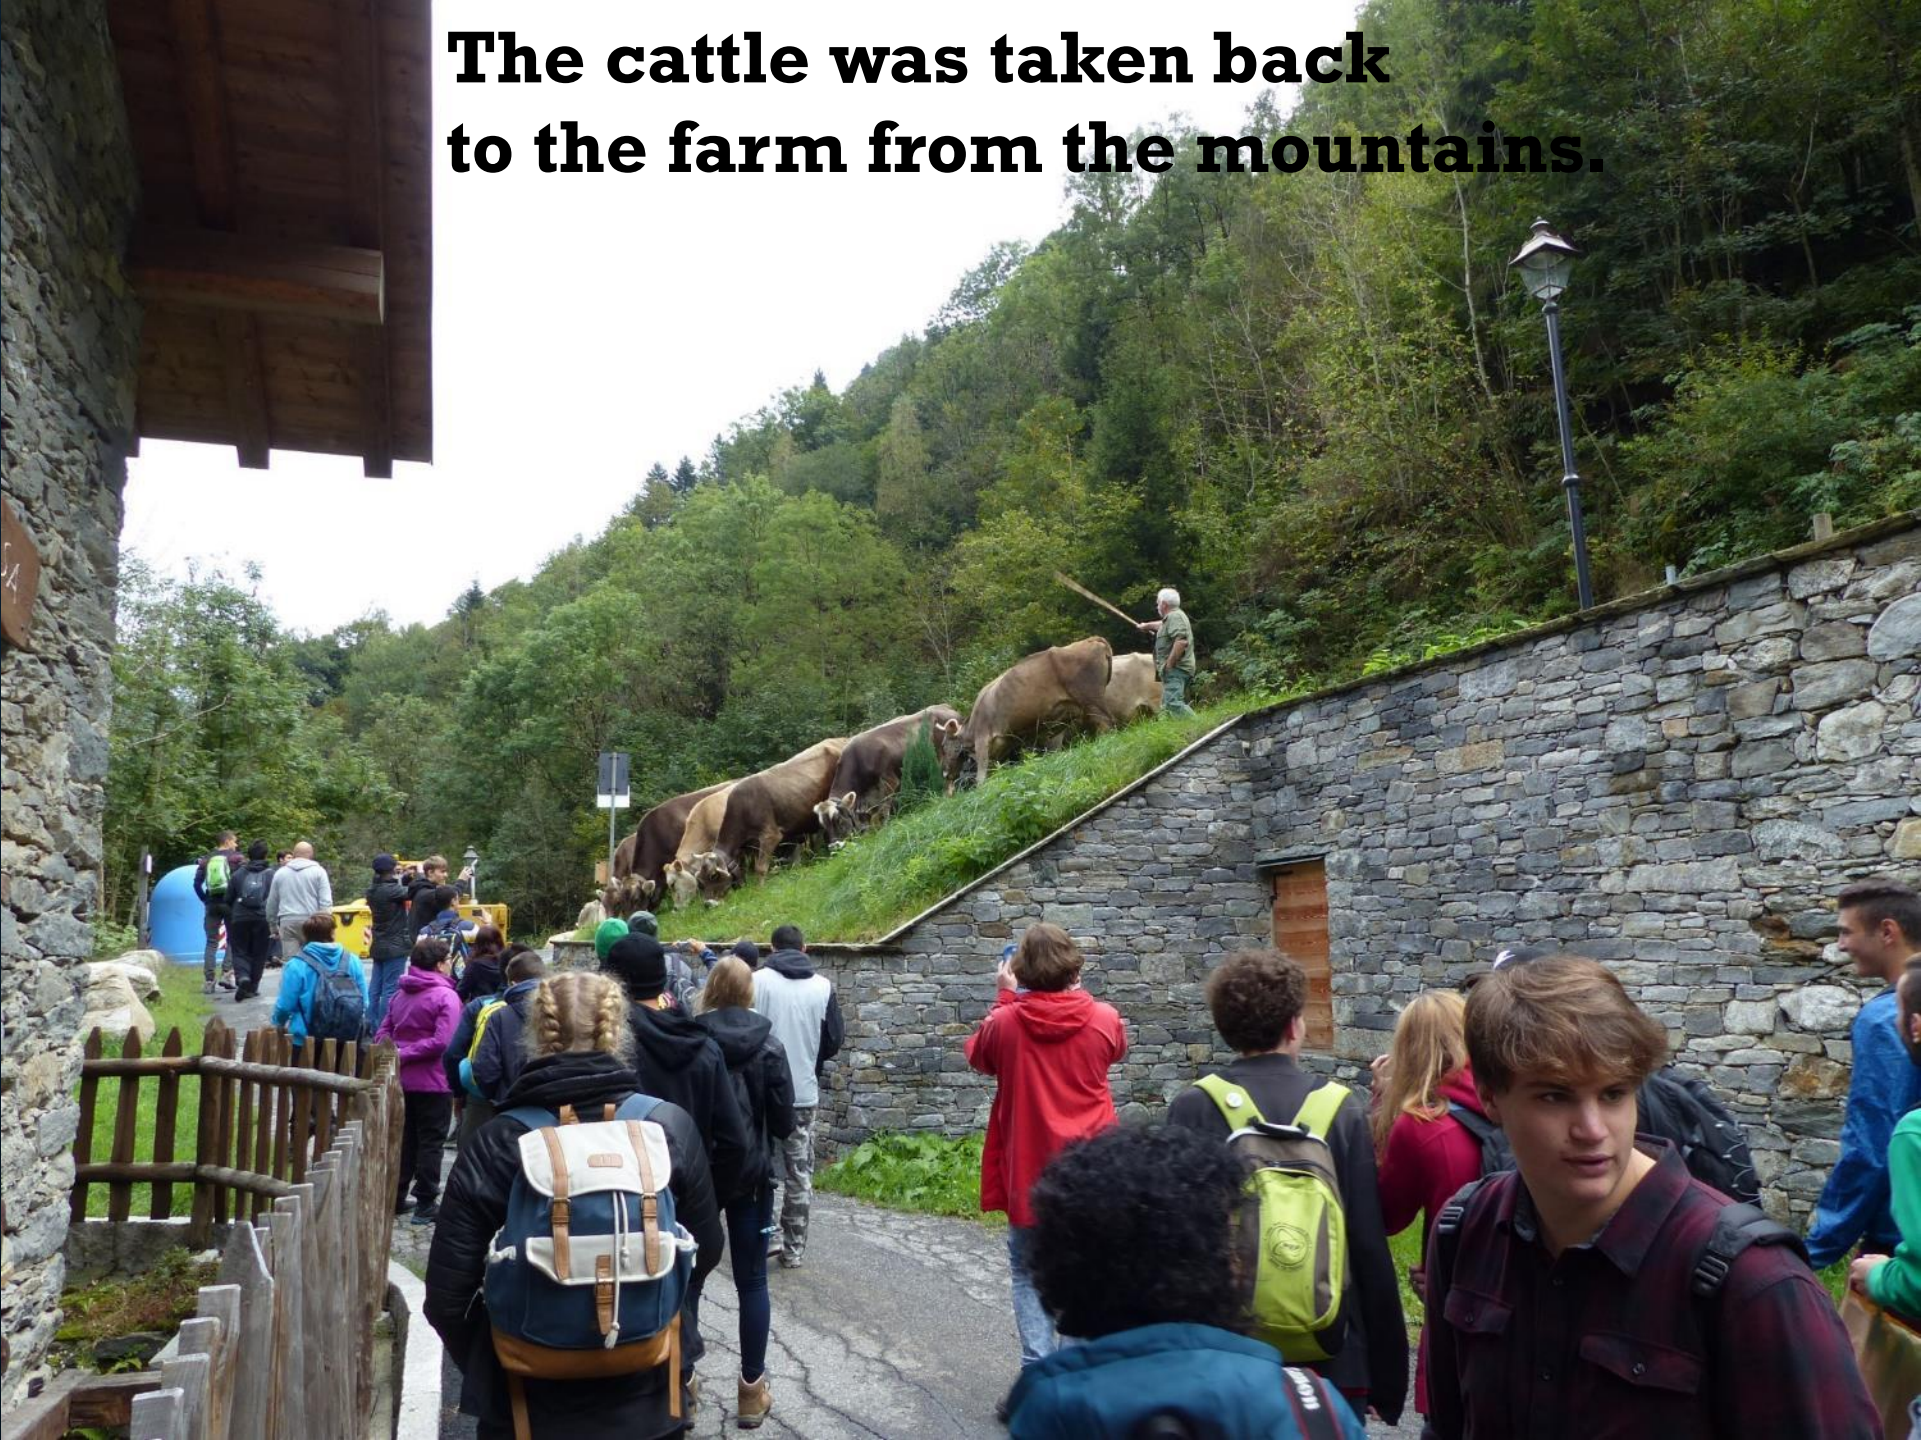



# Heading for the Walser Museum

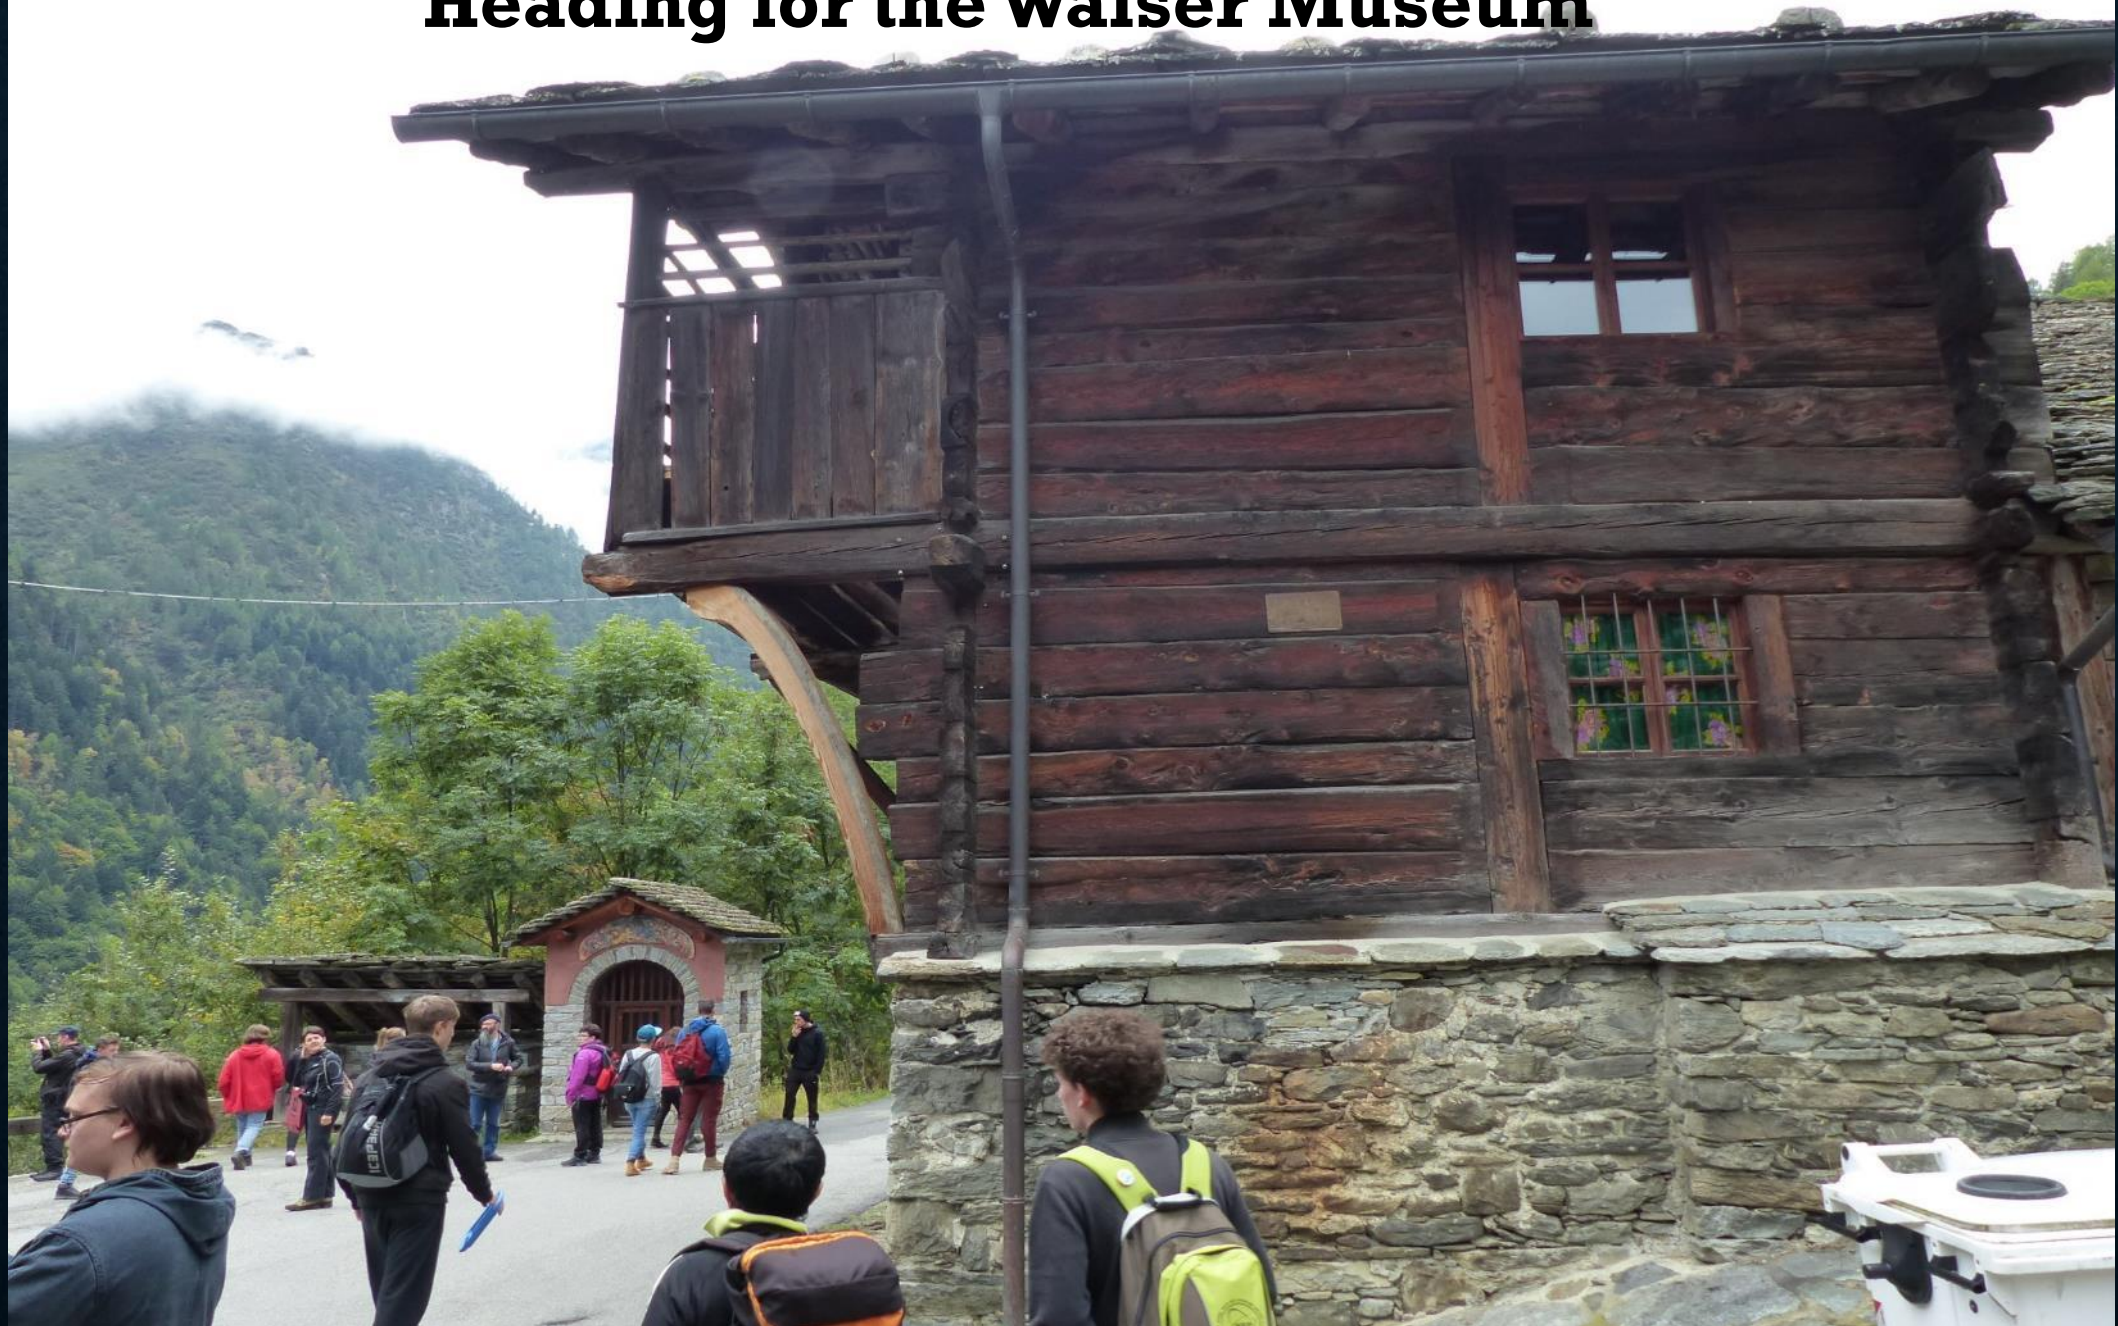



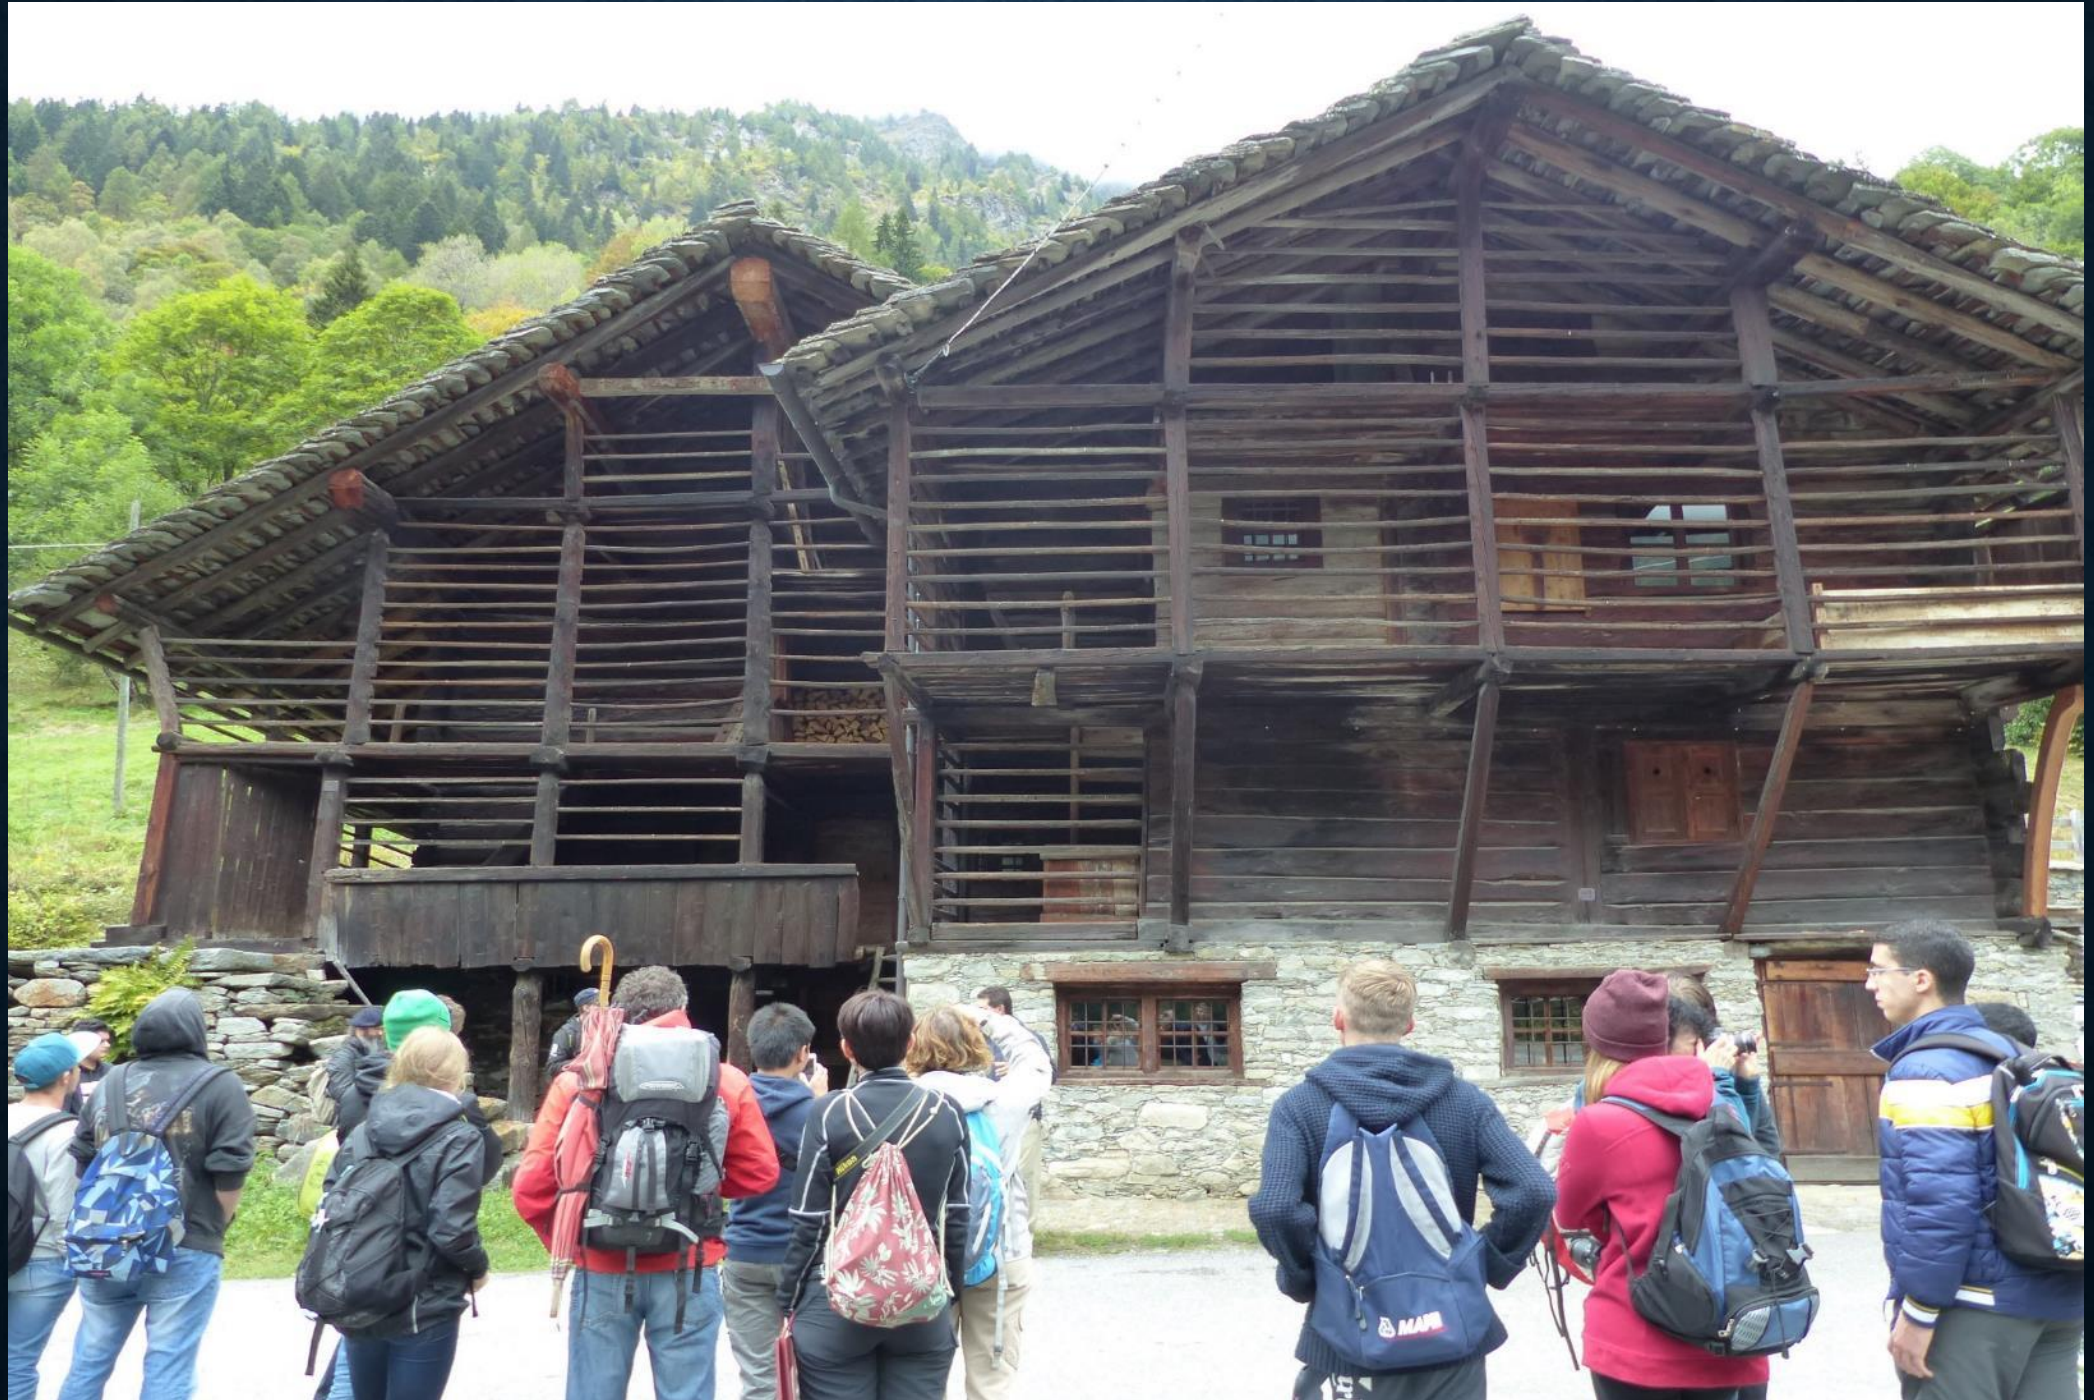



# **A local farm in the mountains**

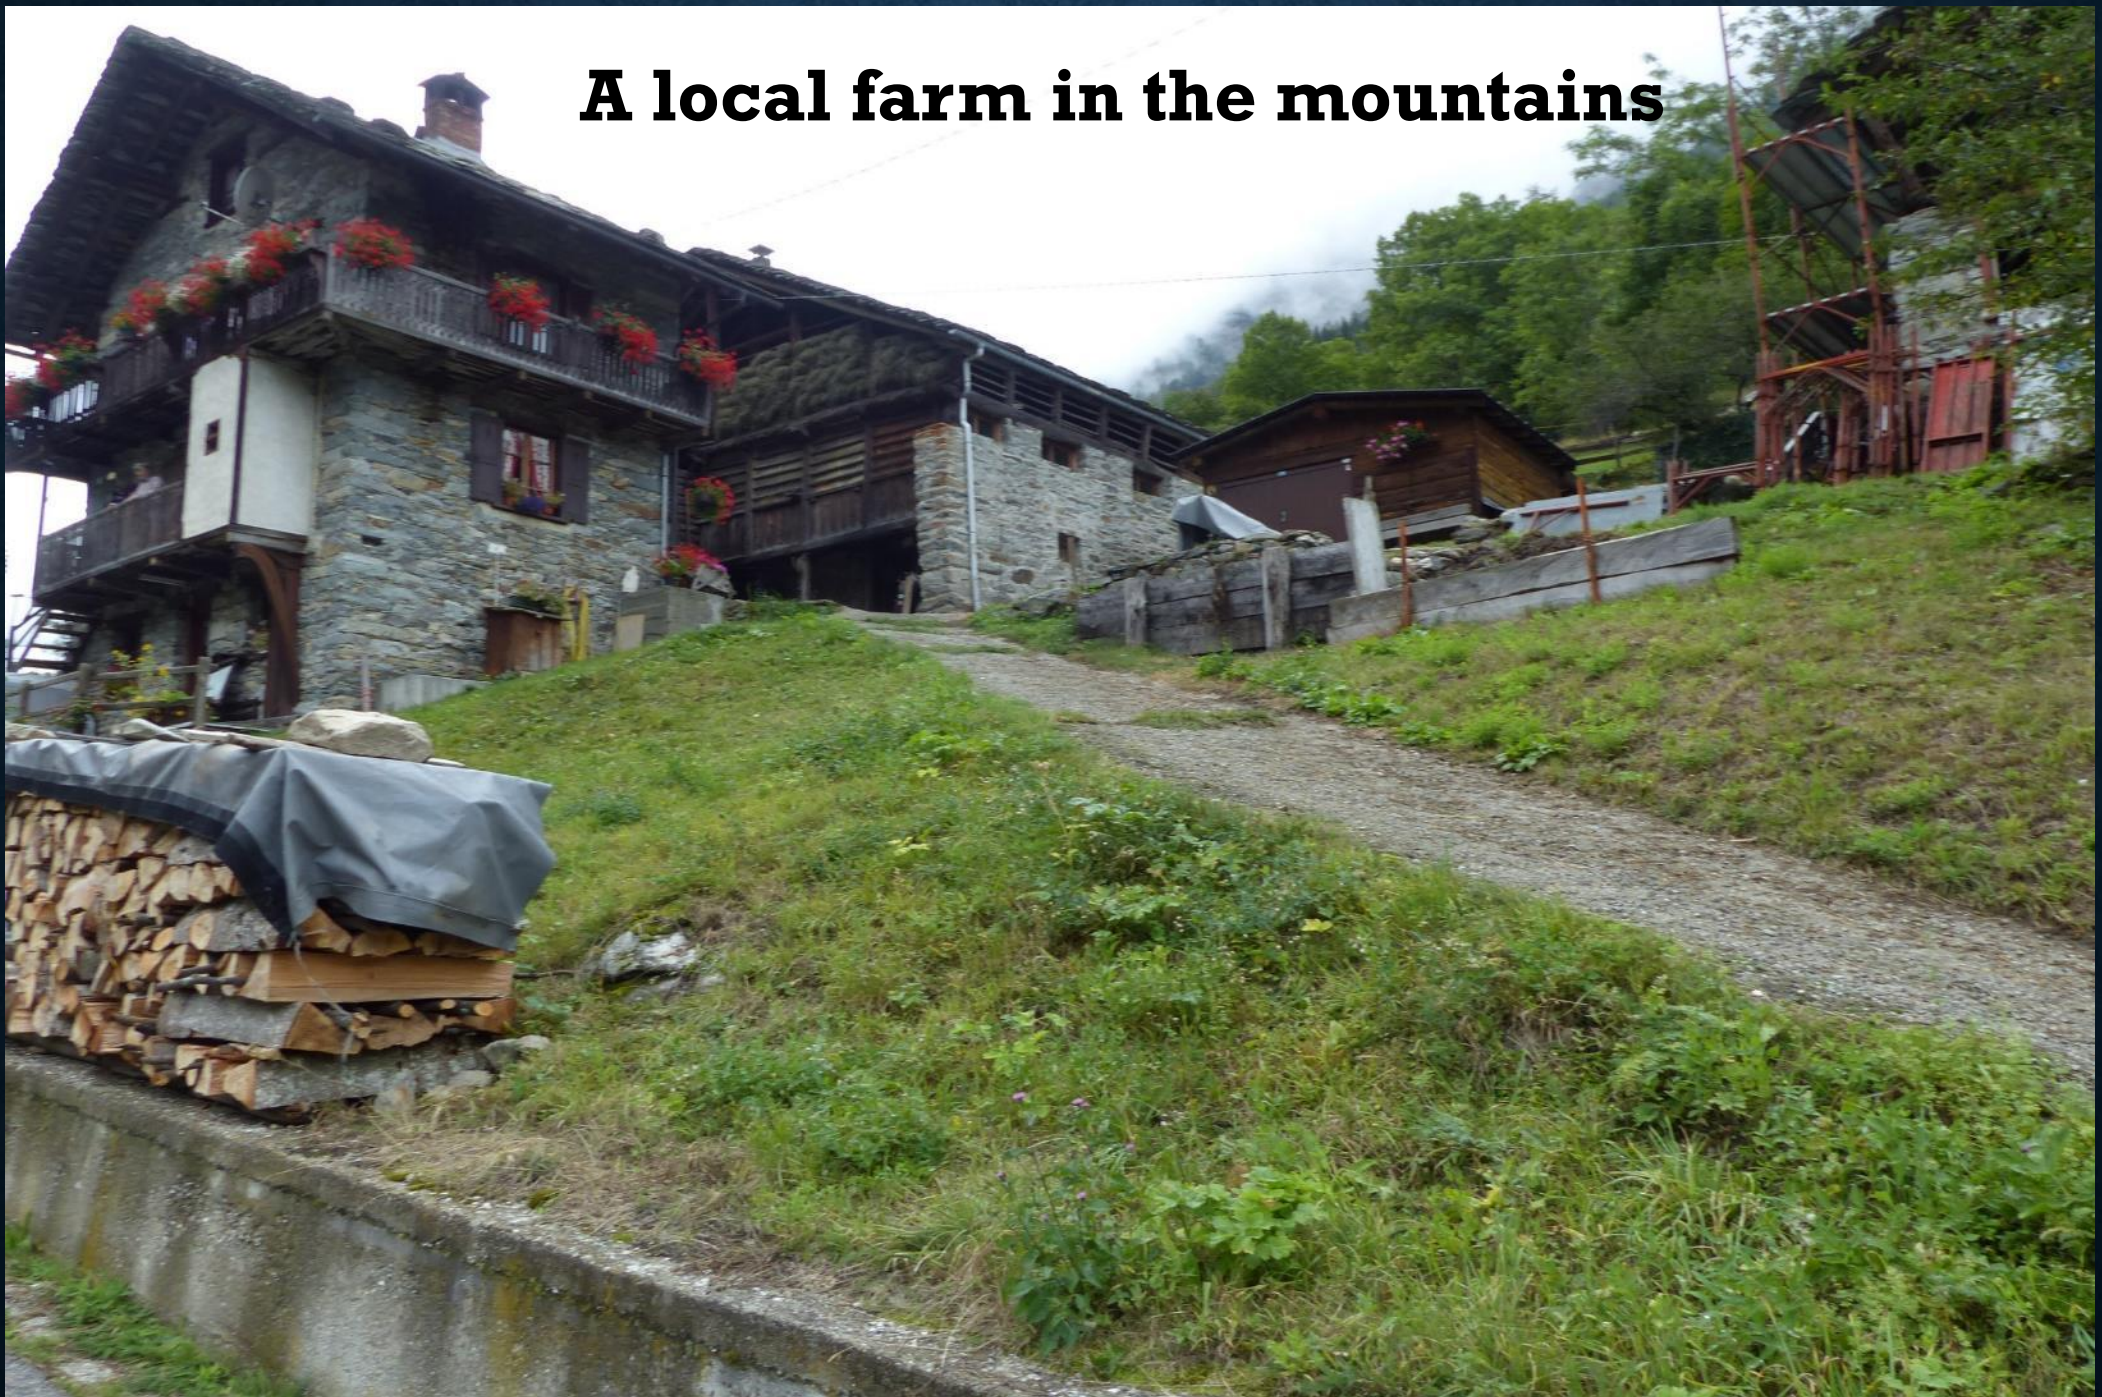



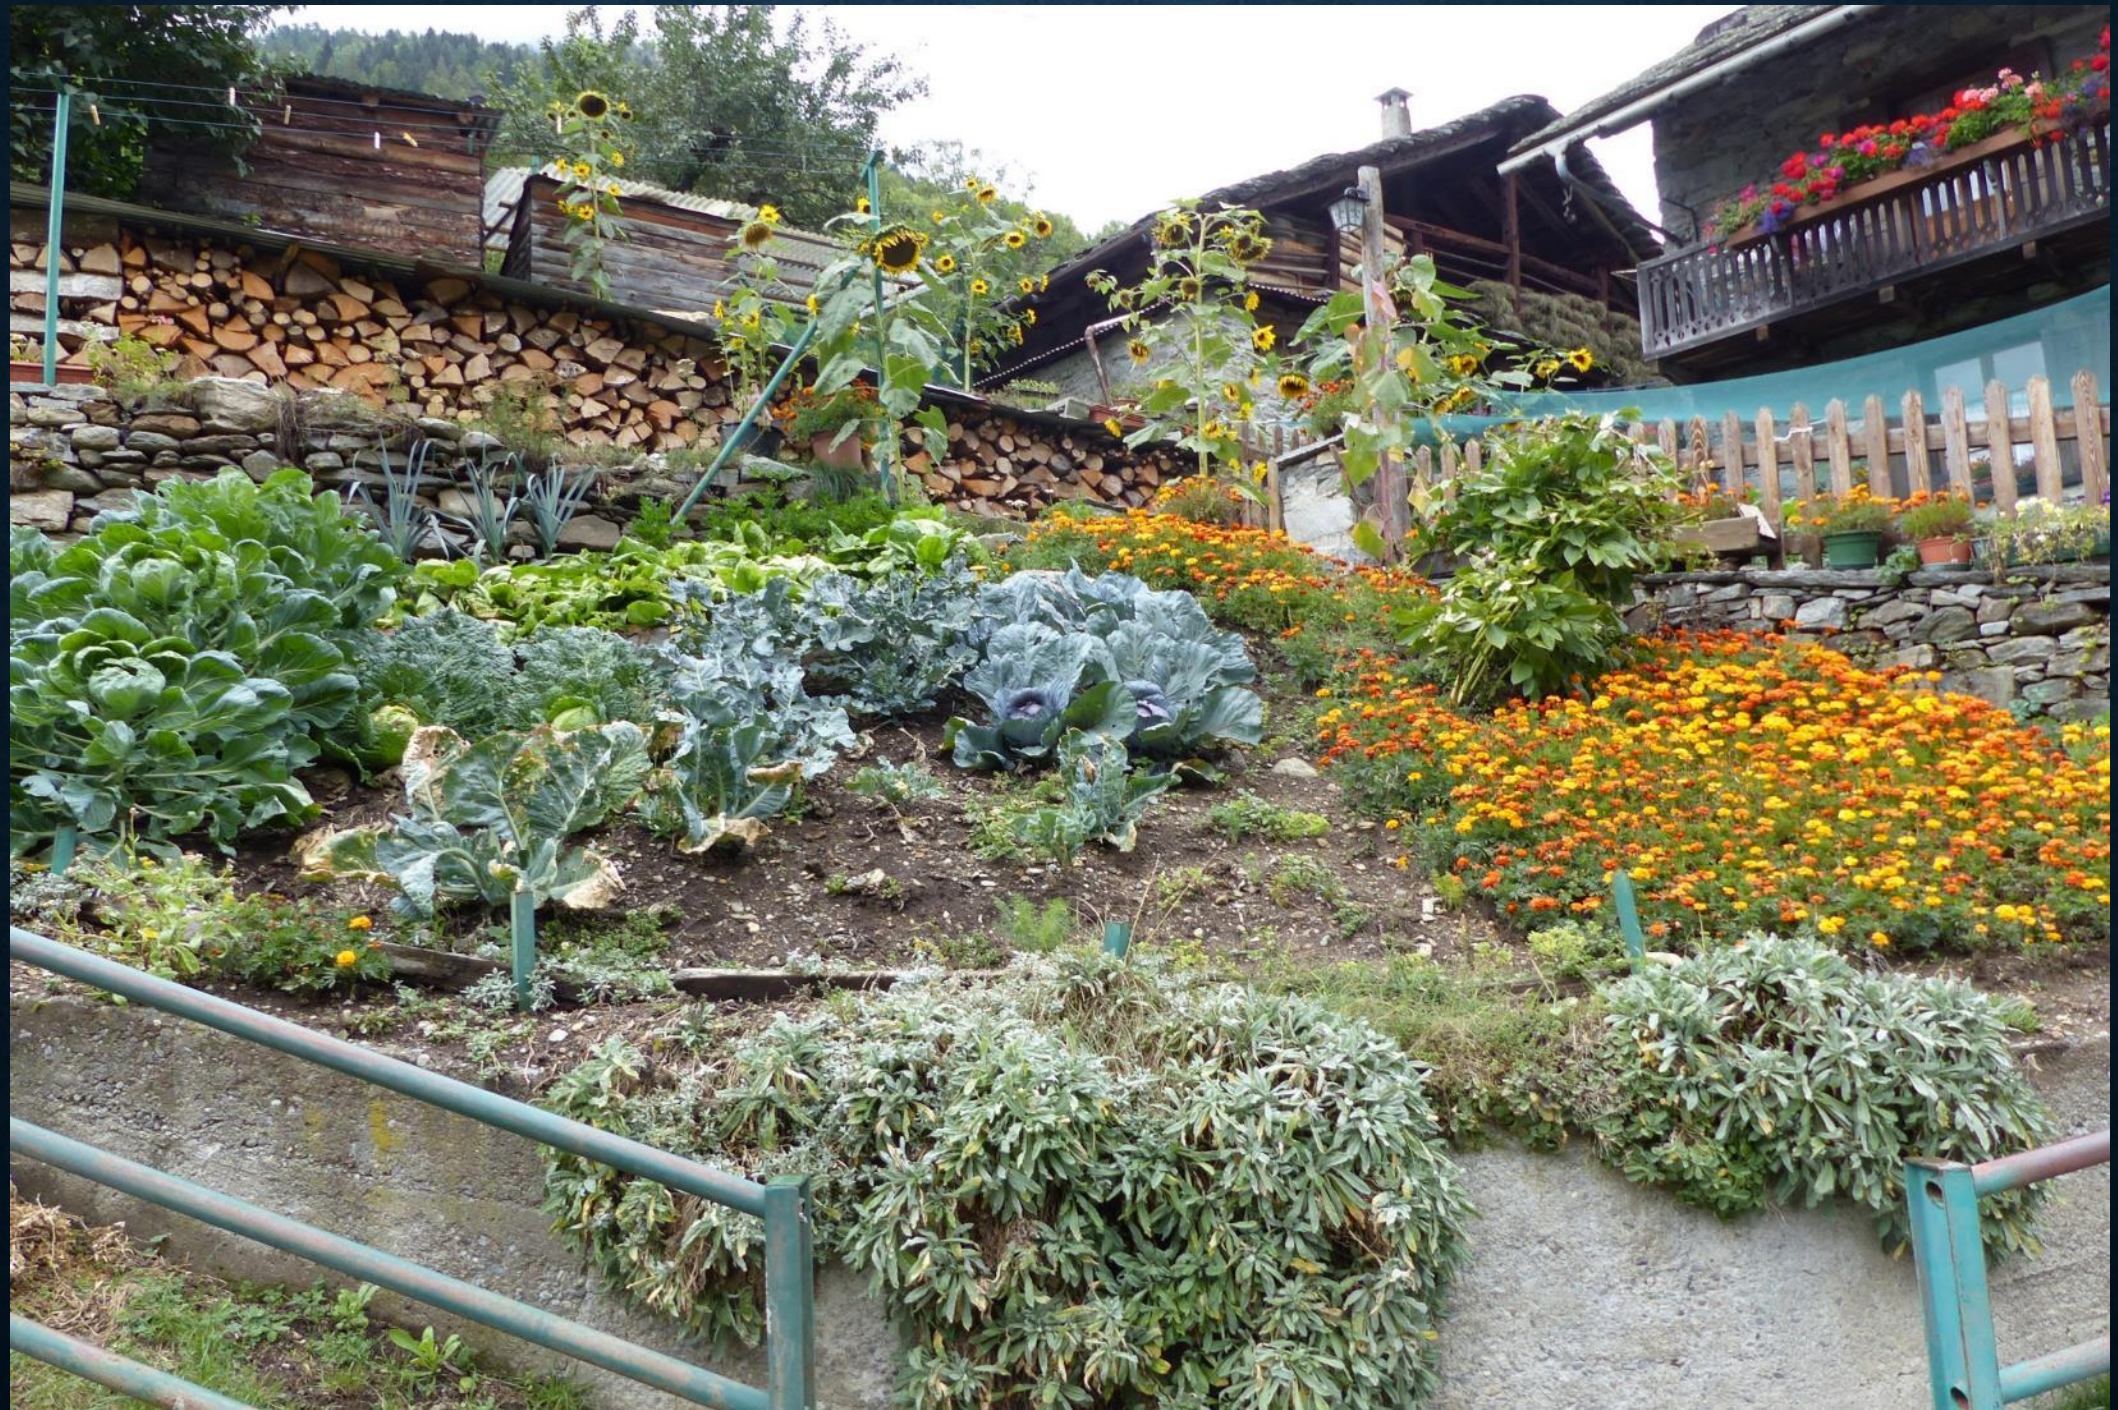



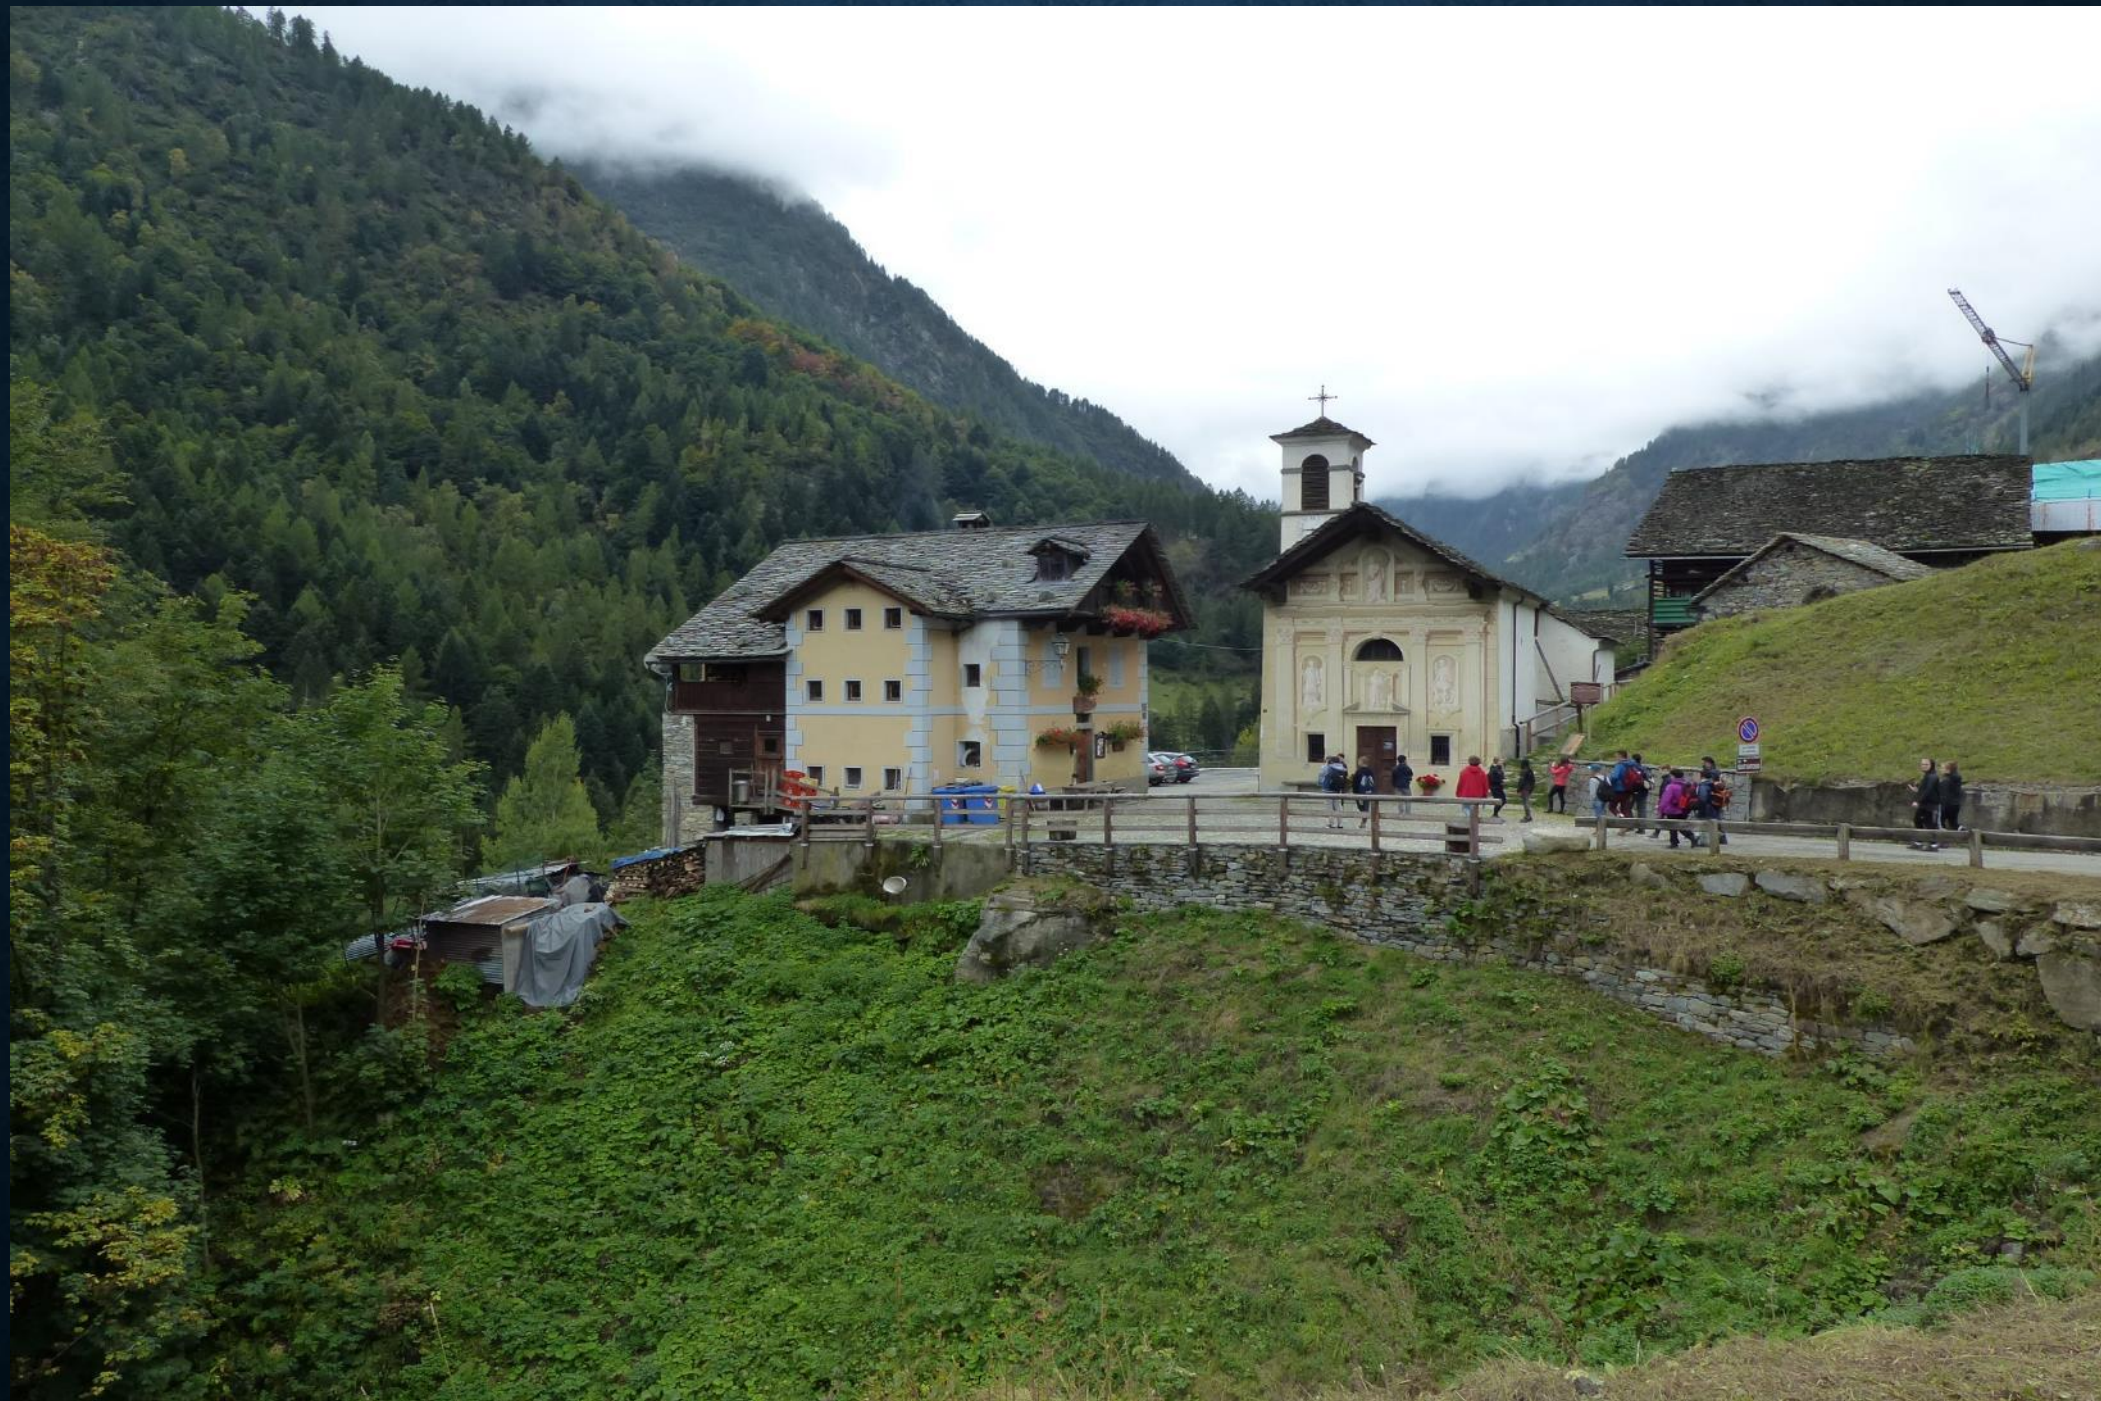



DAL RISO AL ROSA  
www.dalrisoalrosa.it

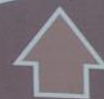

**Sentieri dell'Arte**  
100 itinerari della Valle d'Aosta

Cratere di Sant'Antonio

[illegible]

Oratory of Saint Anthony



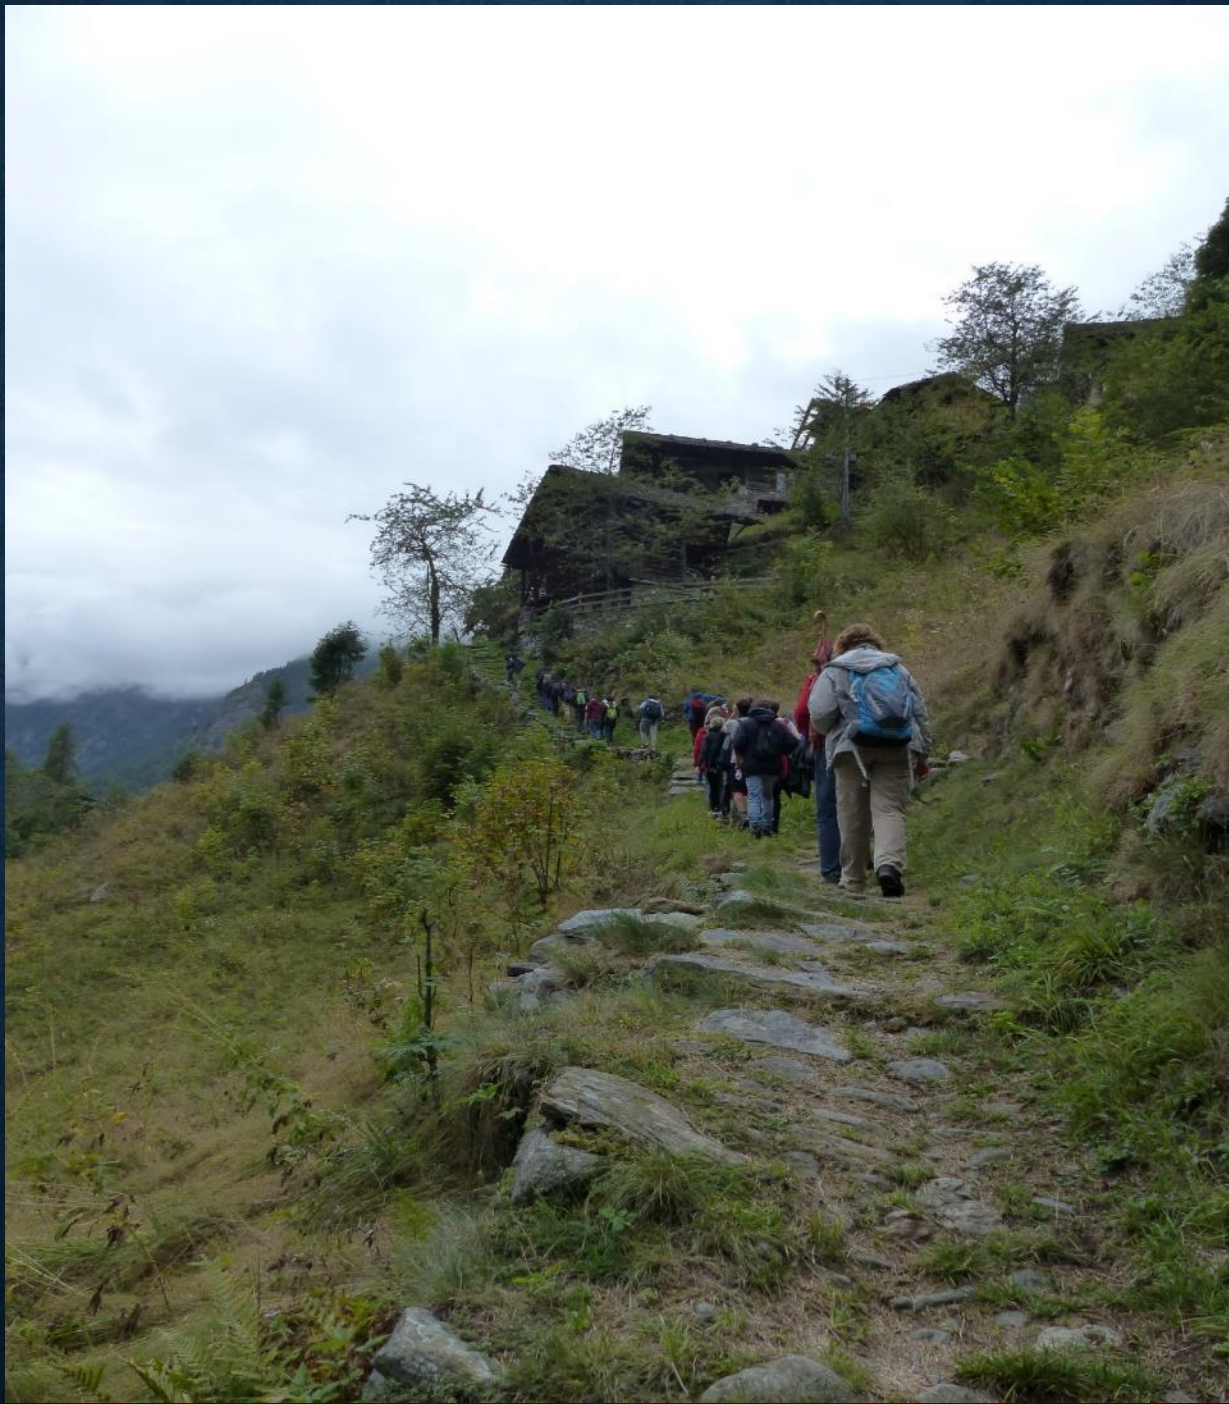



# The Walser Museum

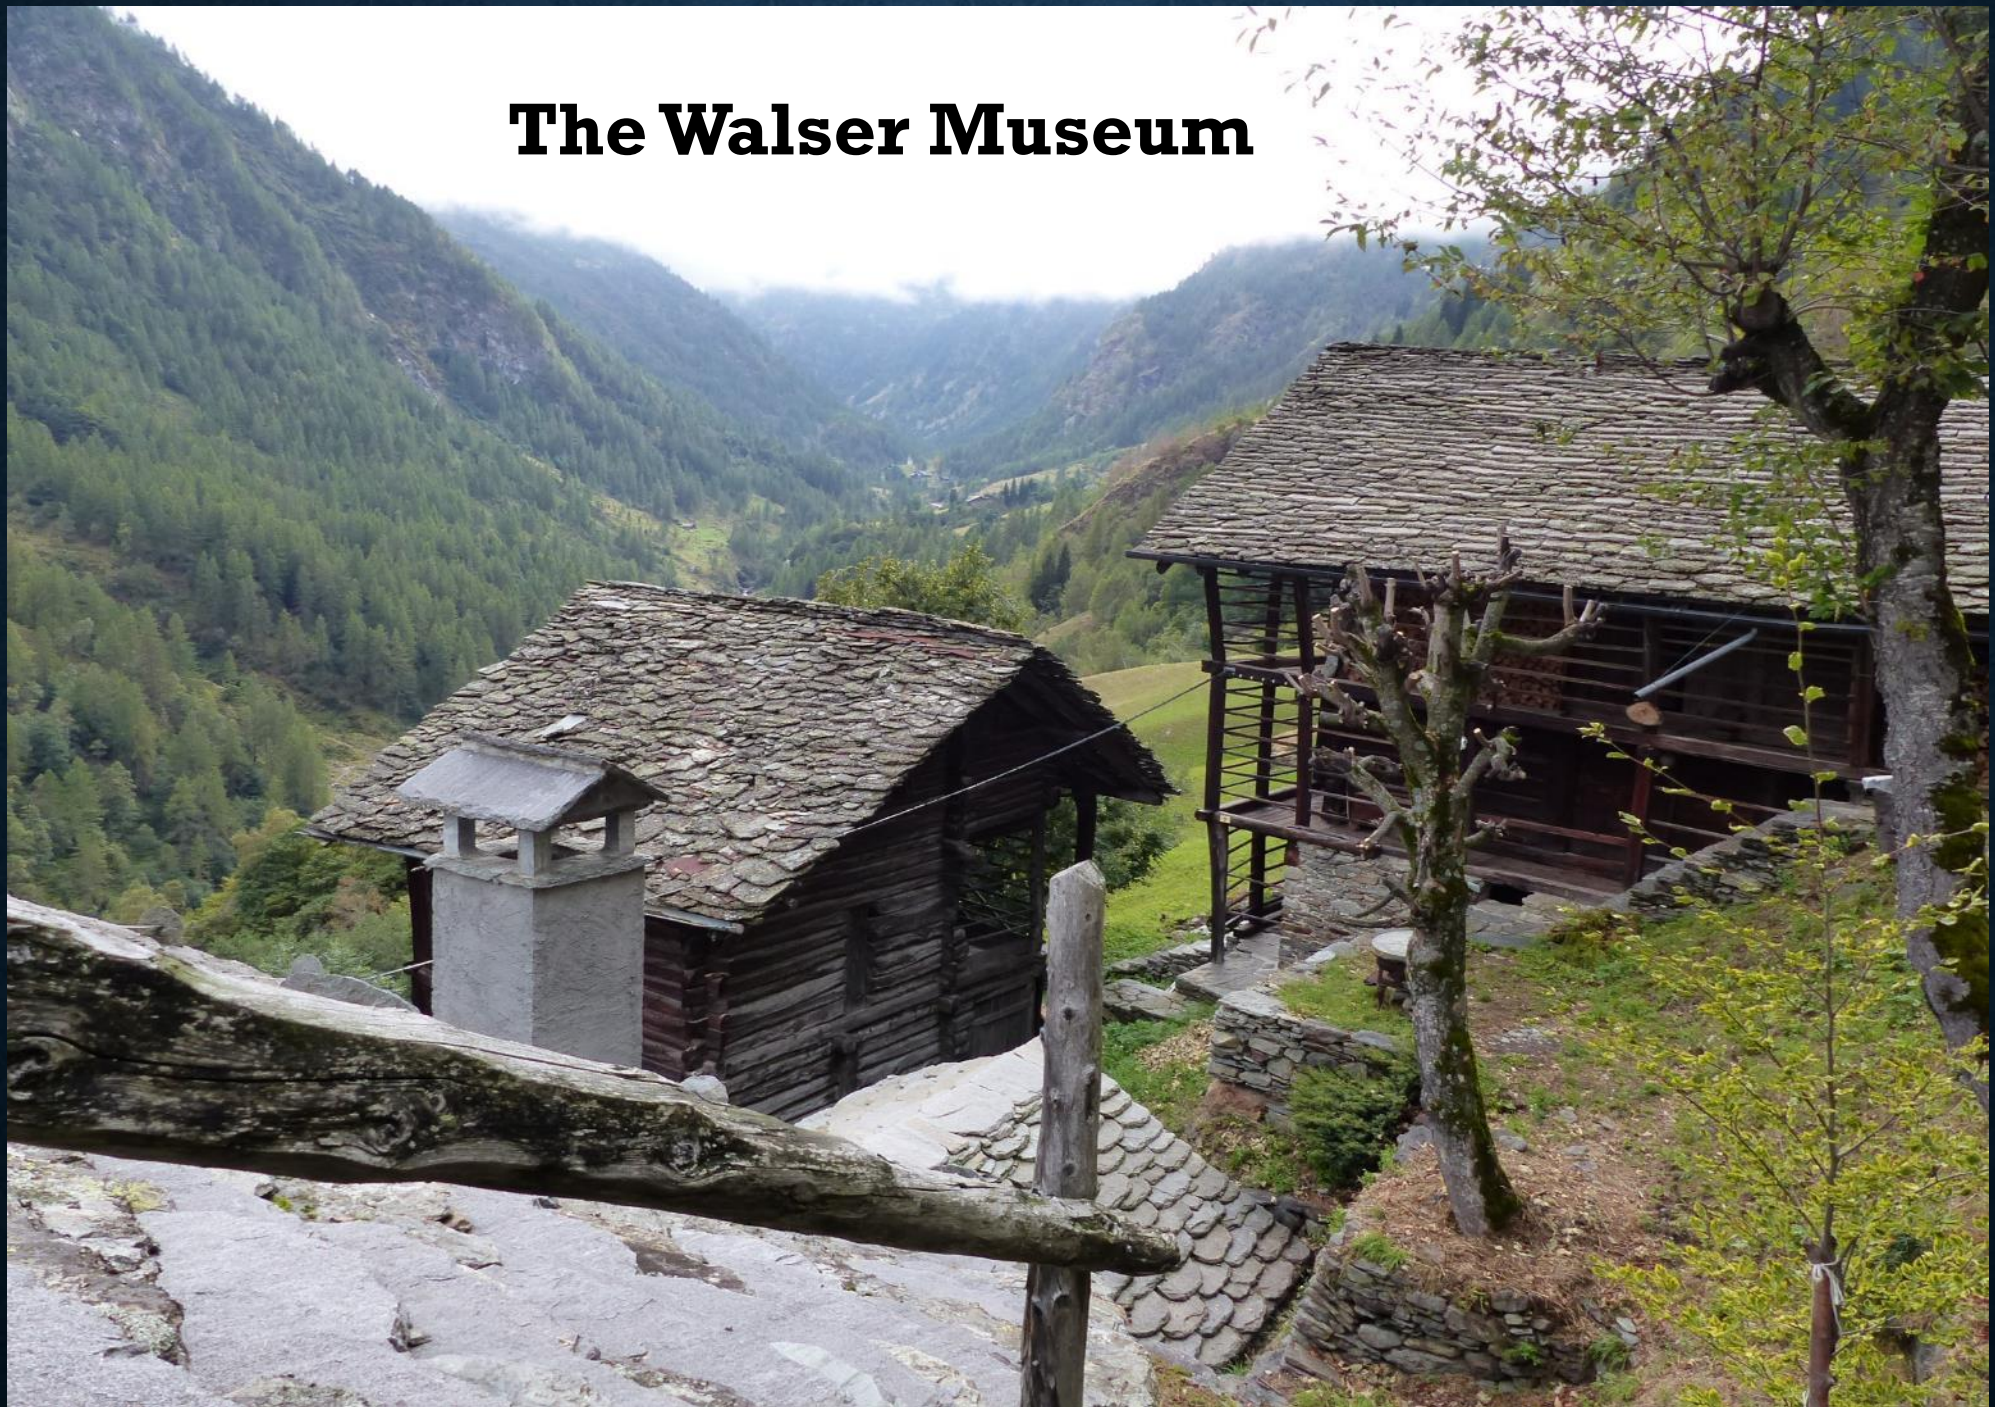



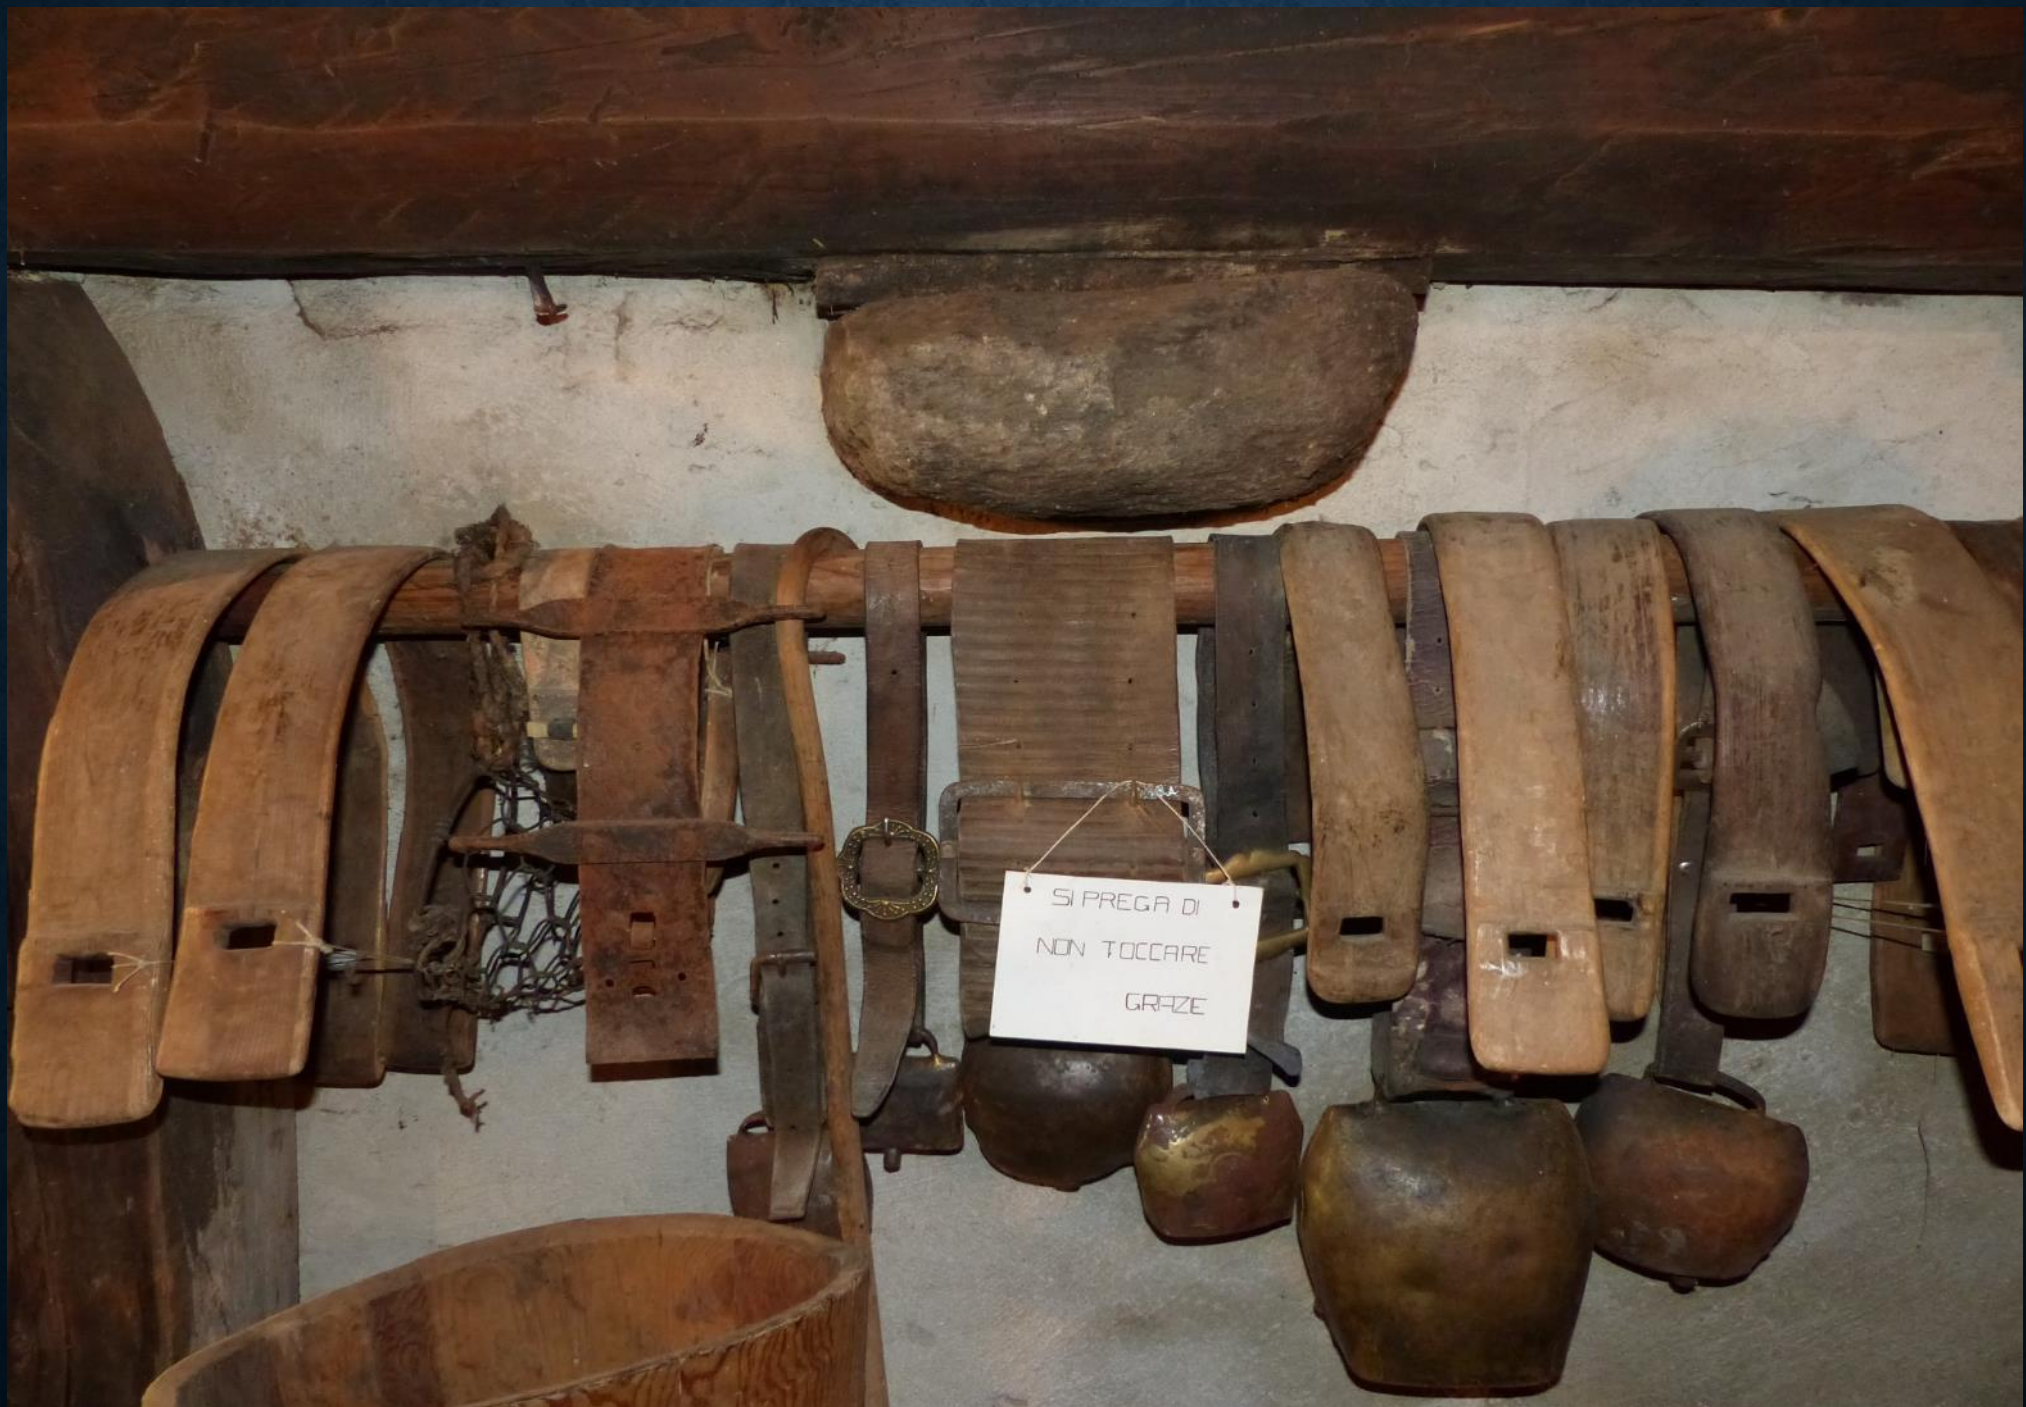

SI PREGA DI  
NON TOCCARE  
GRAZIE



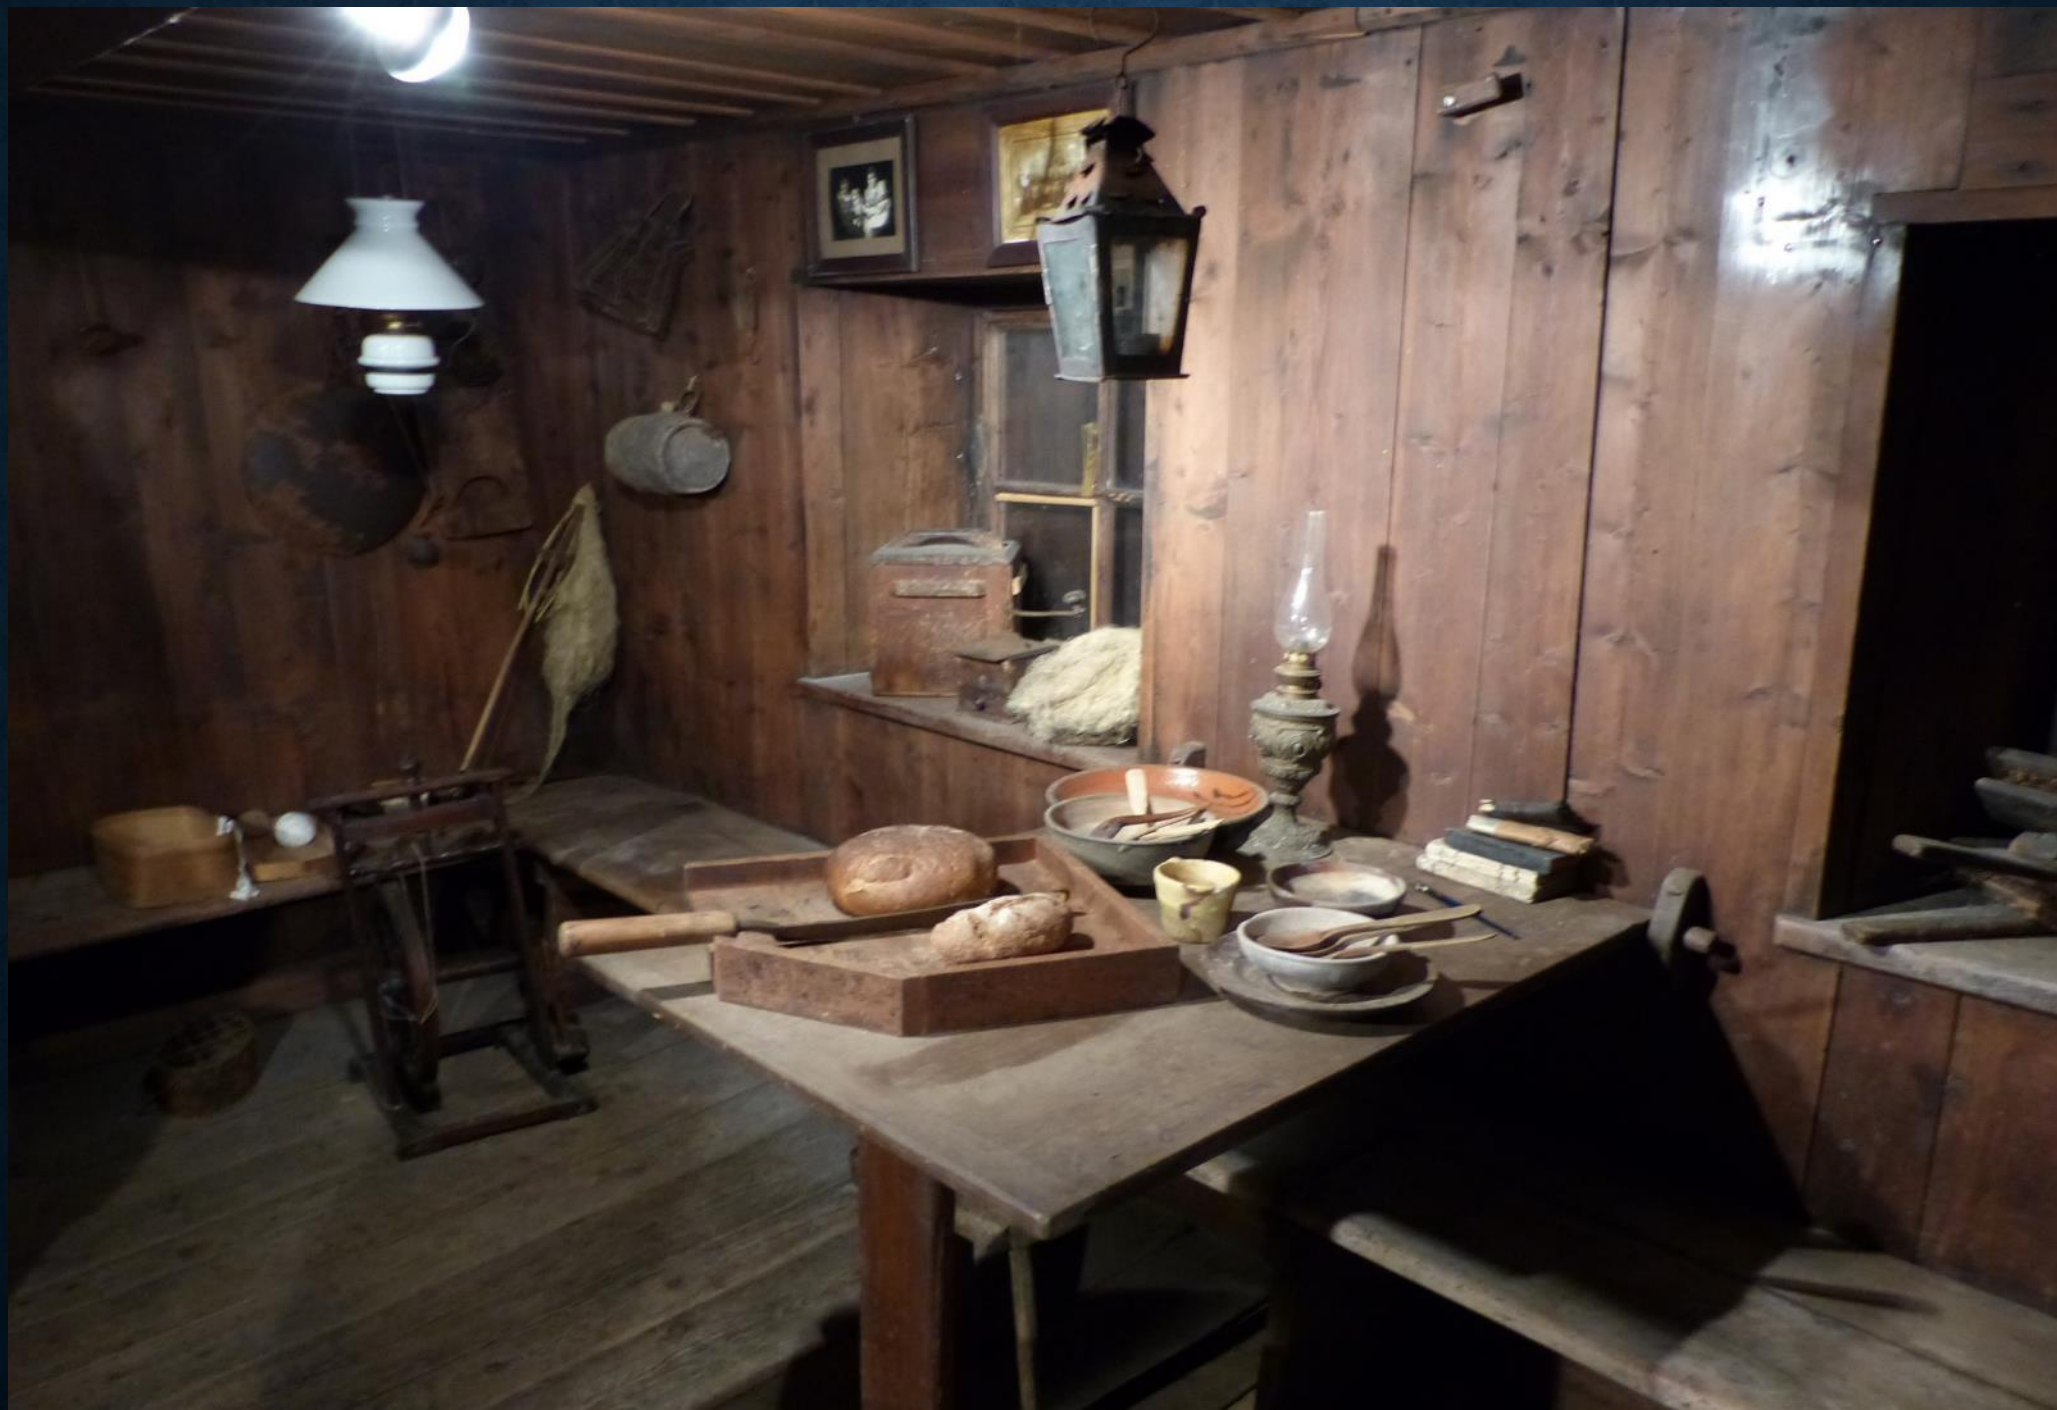



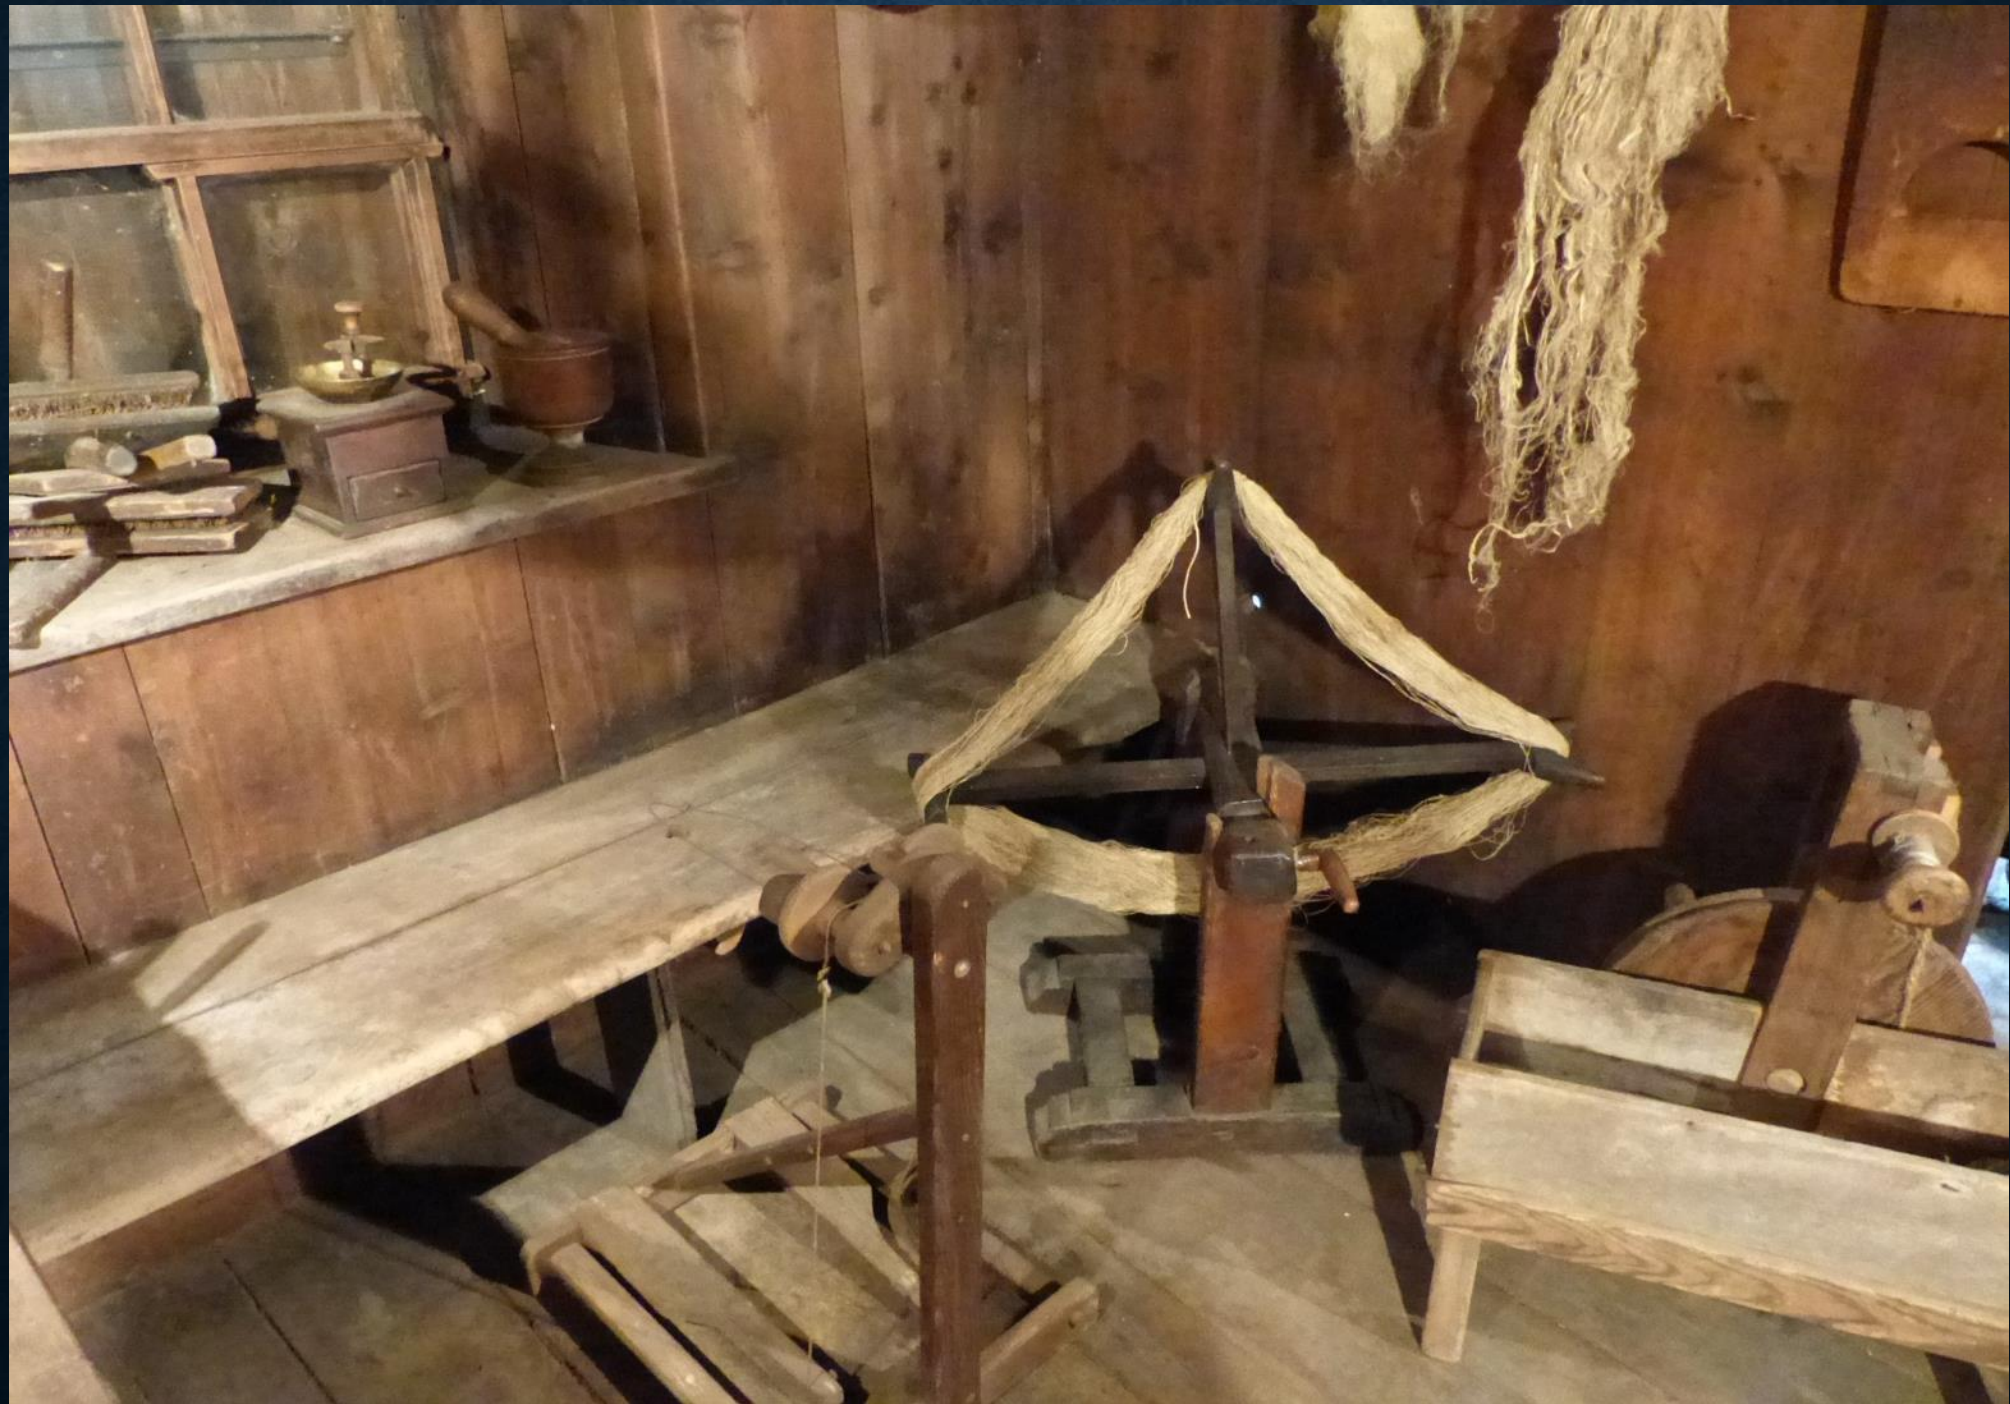



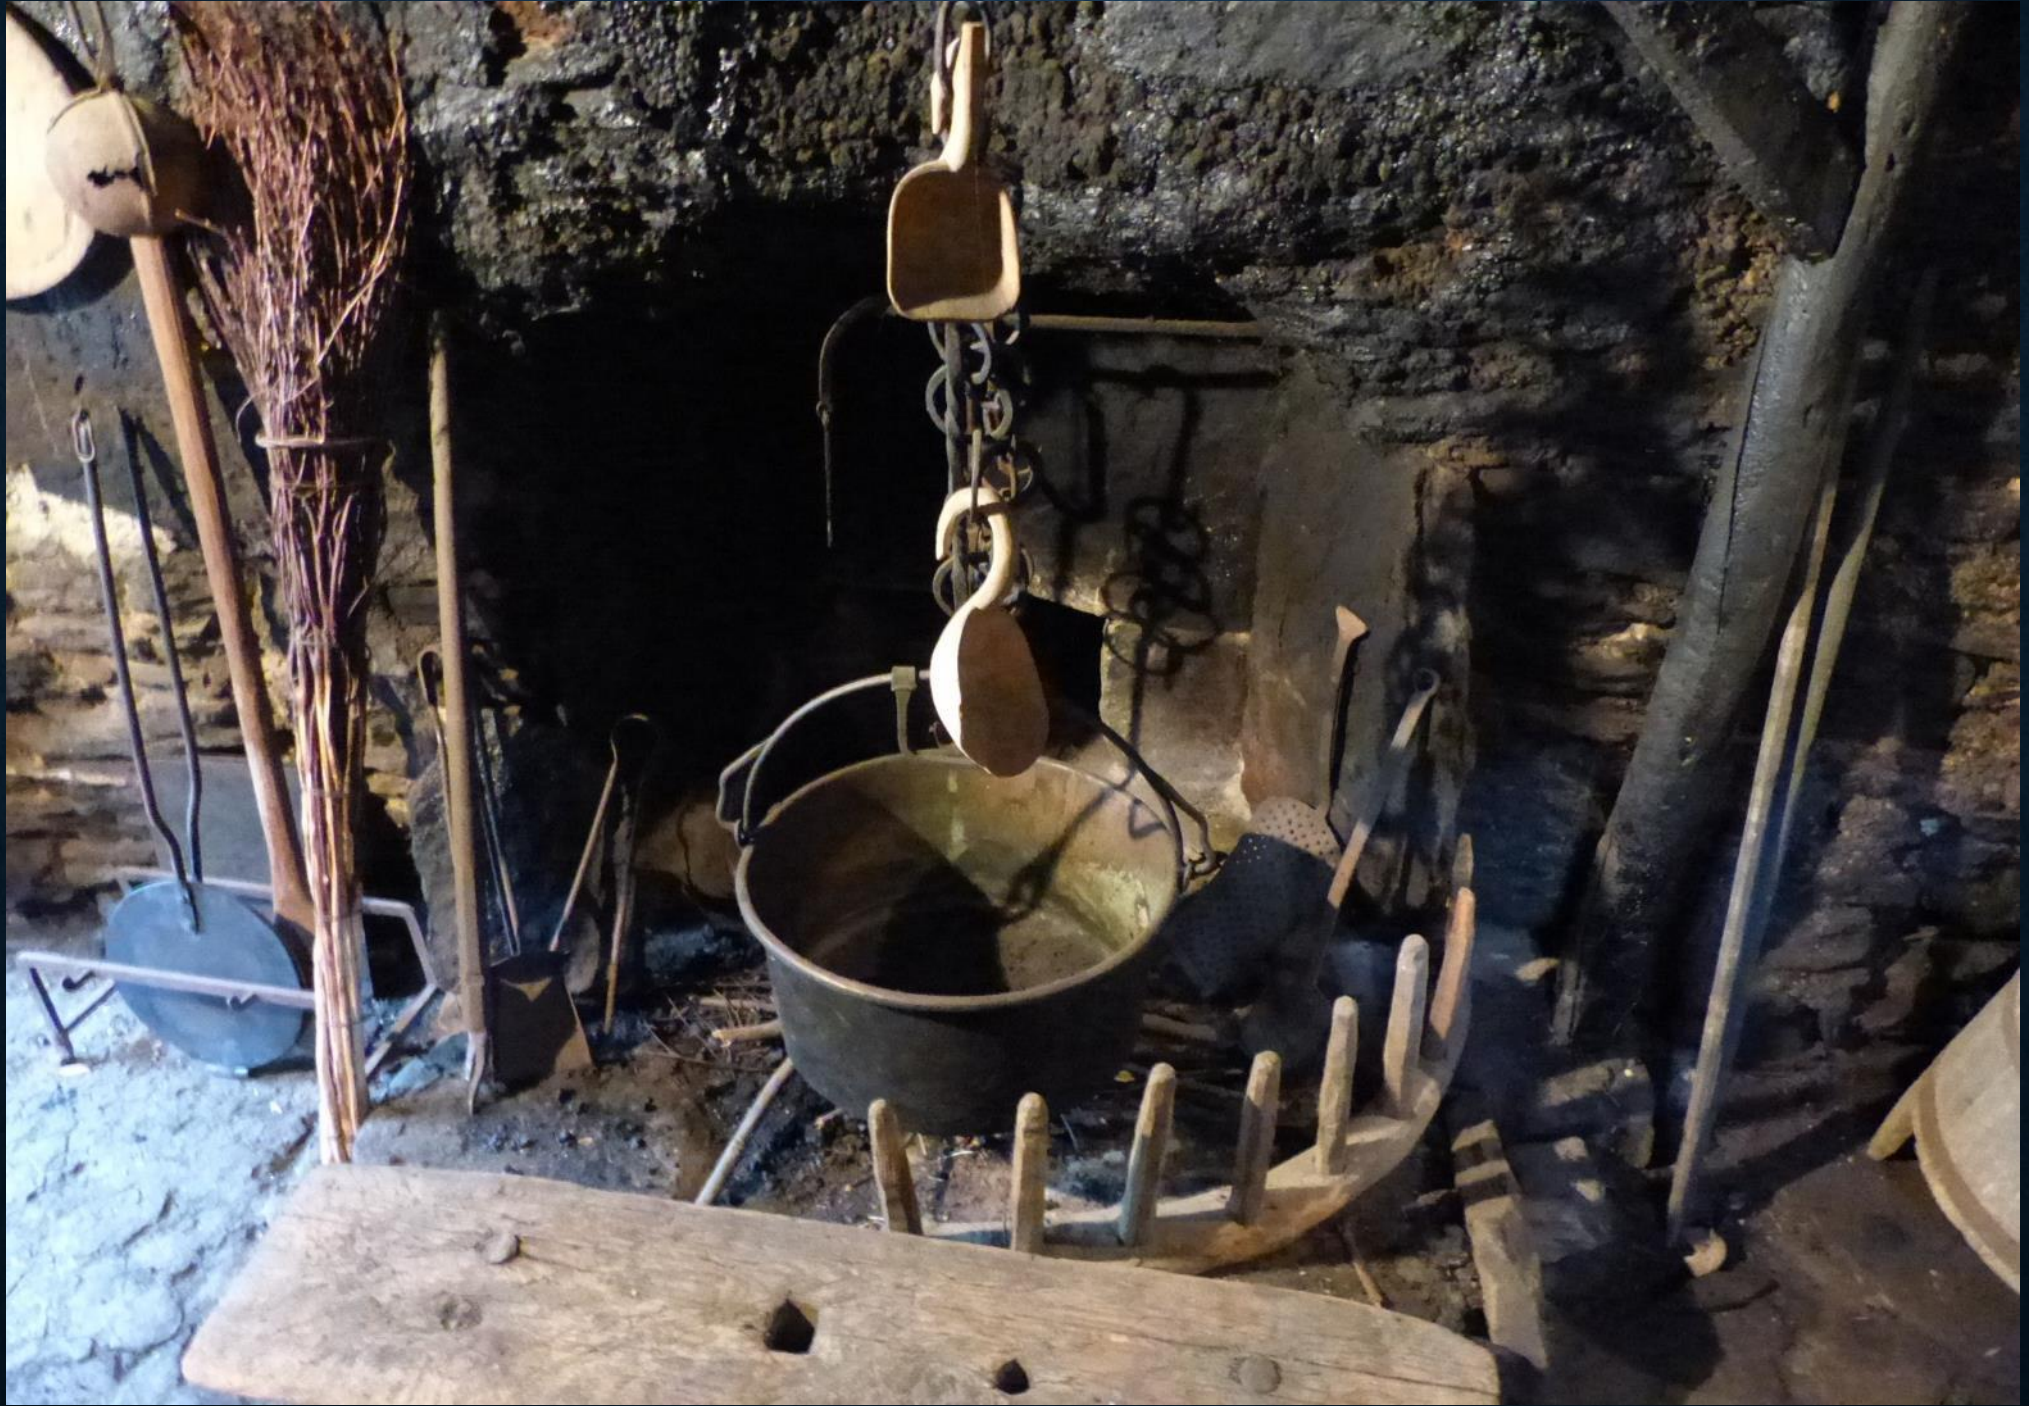



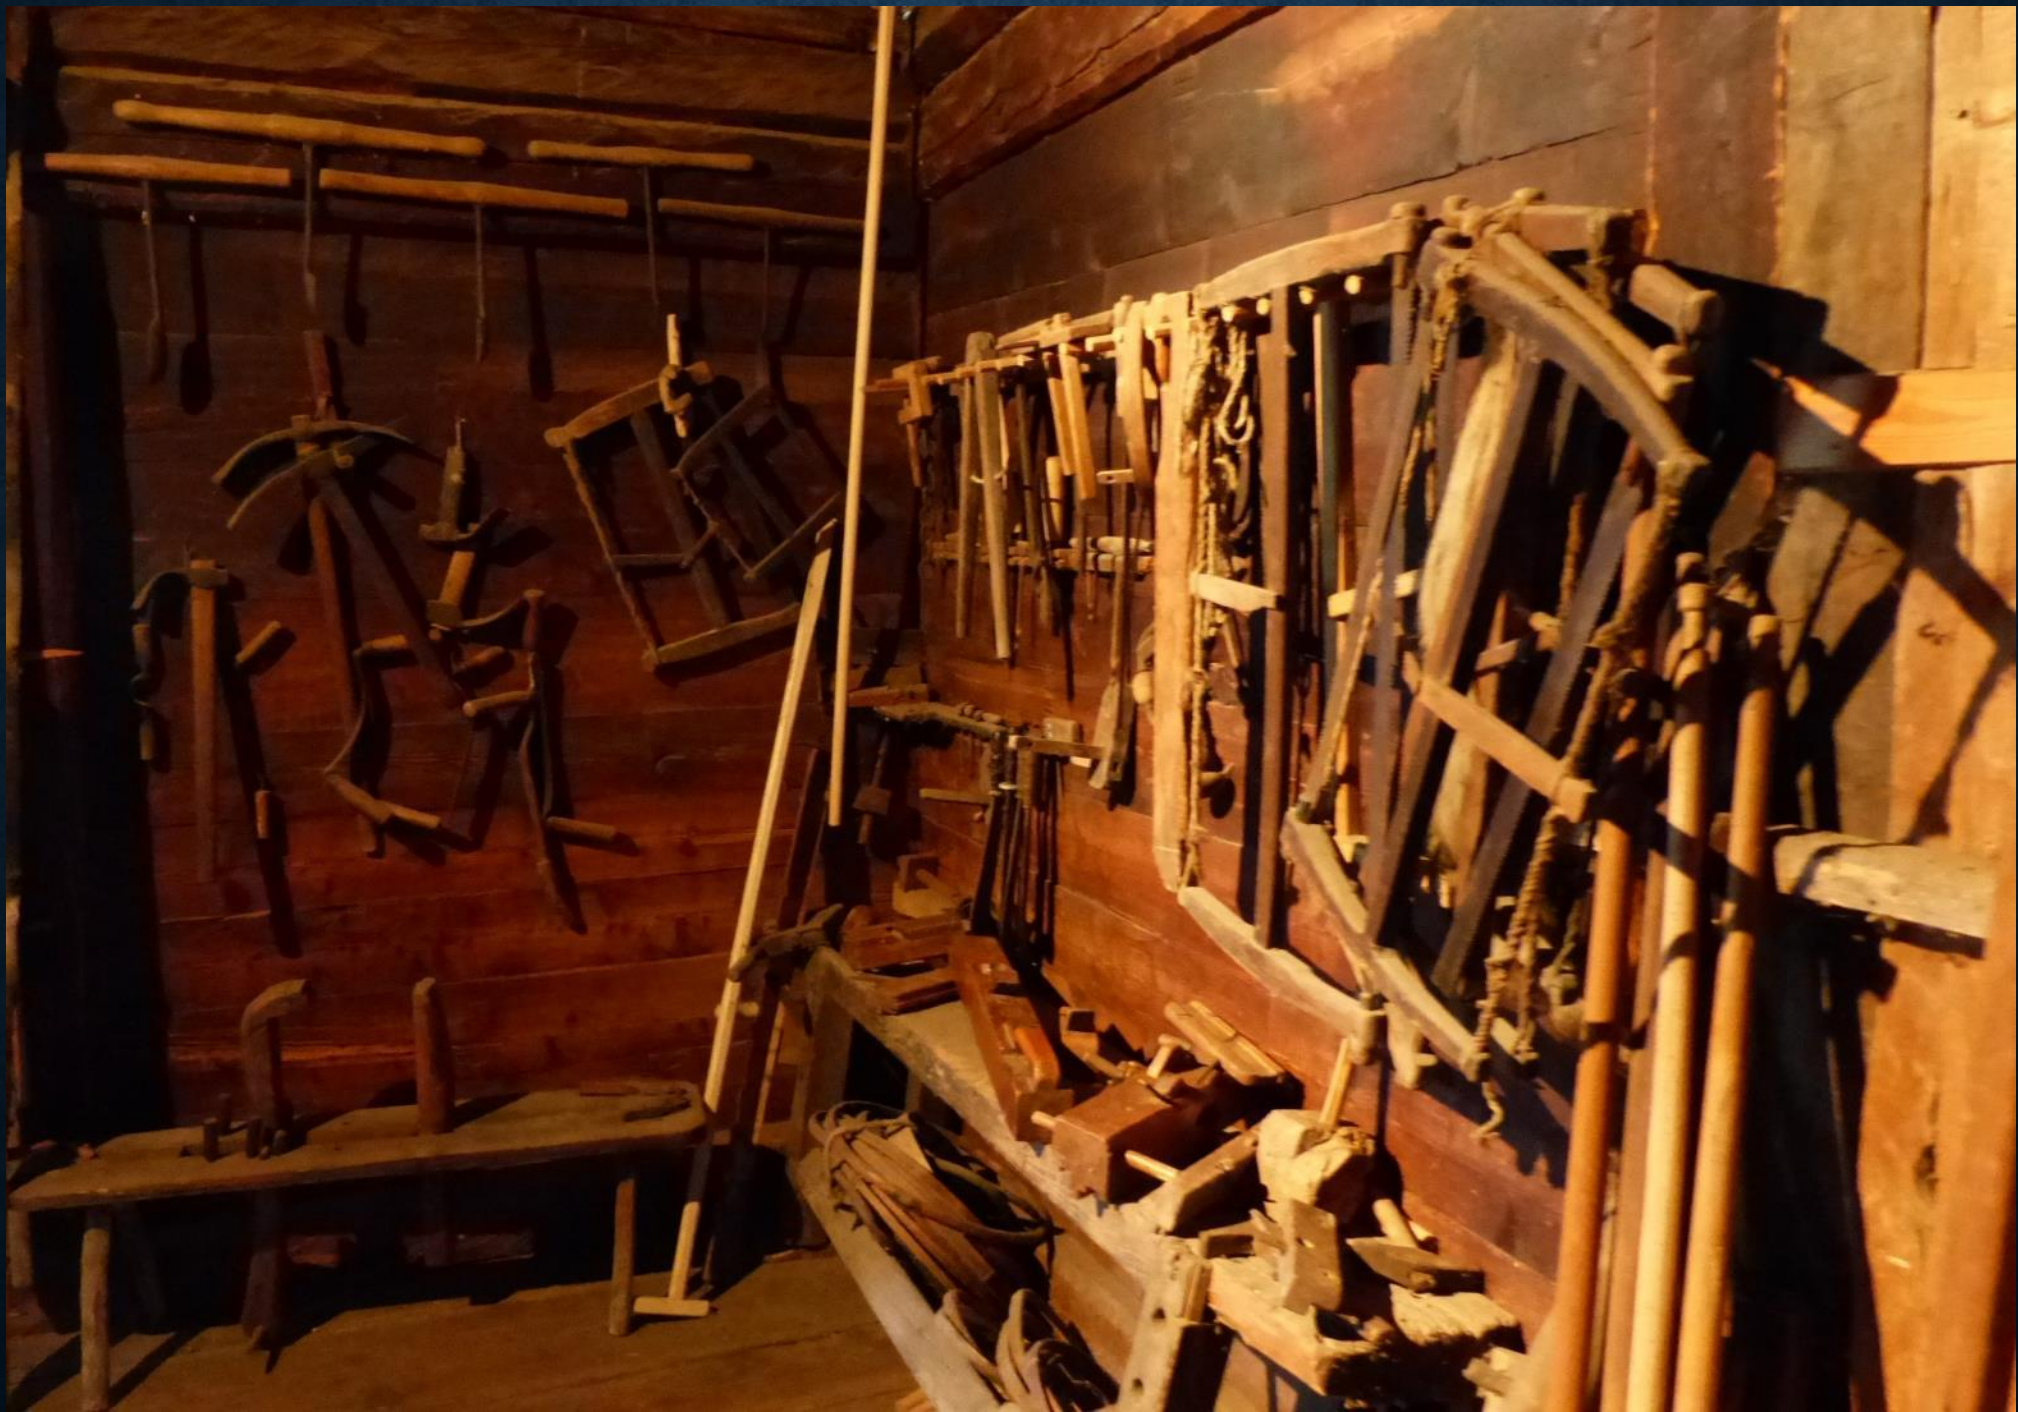



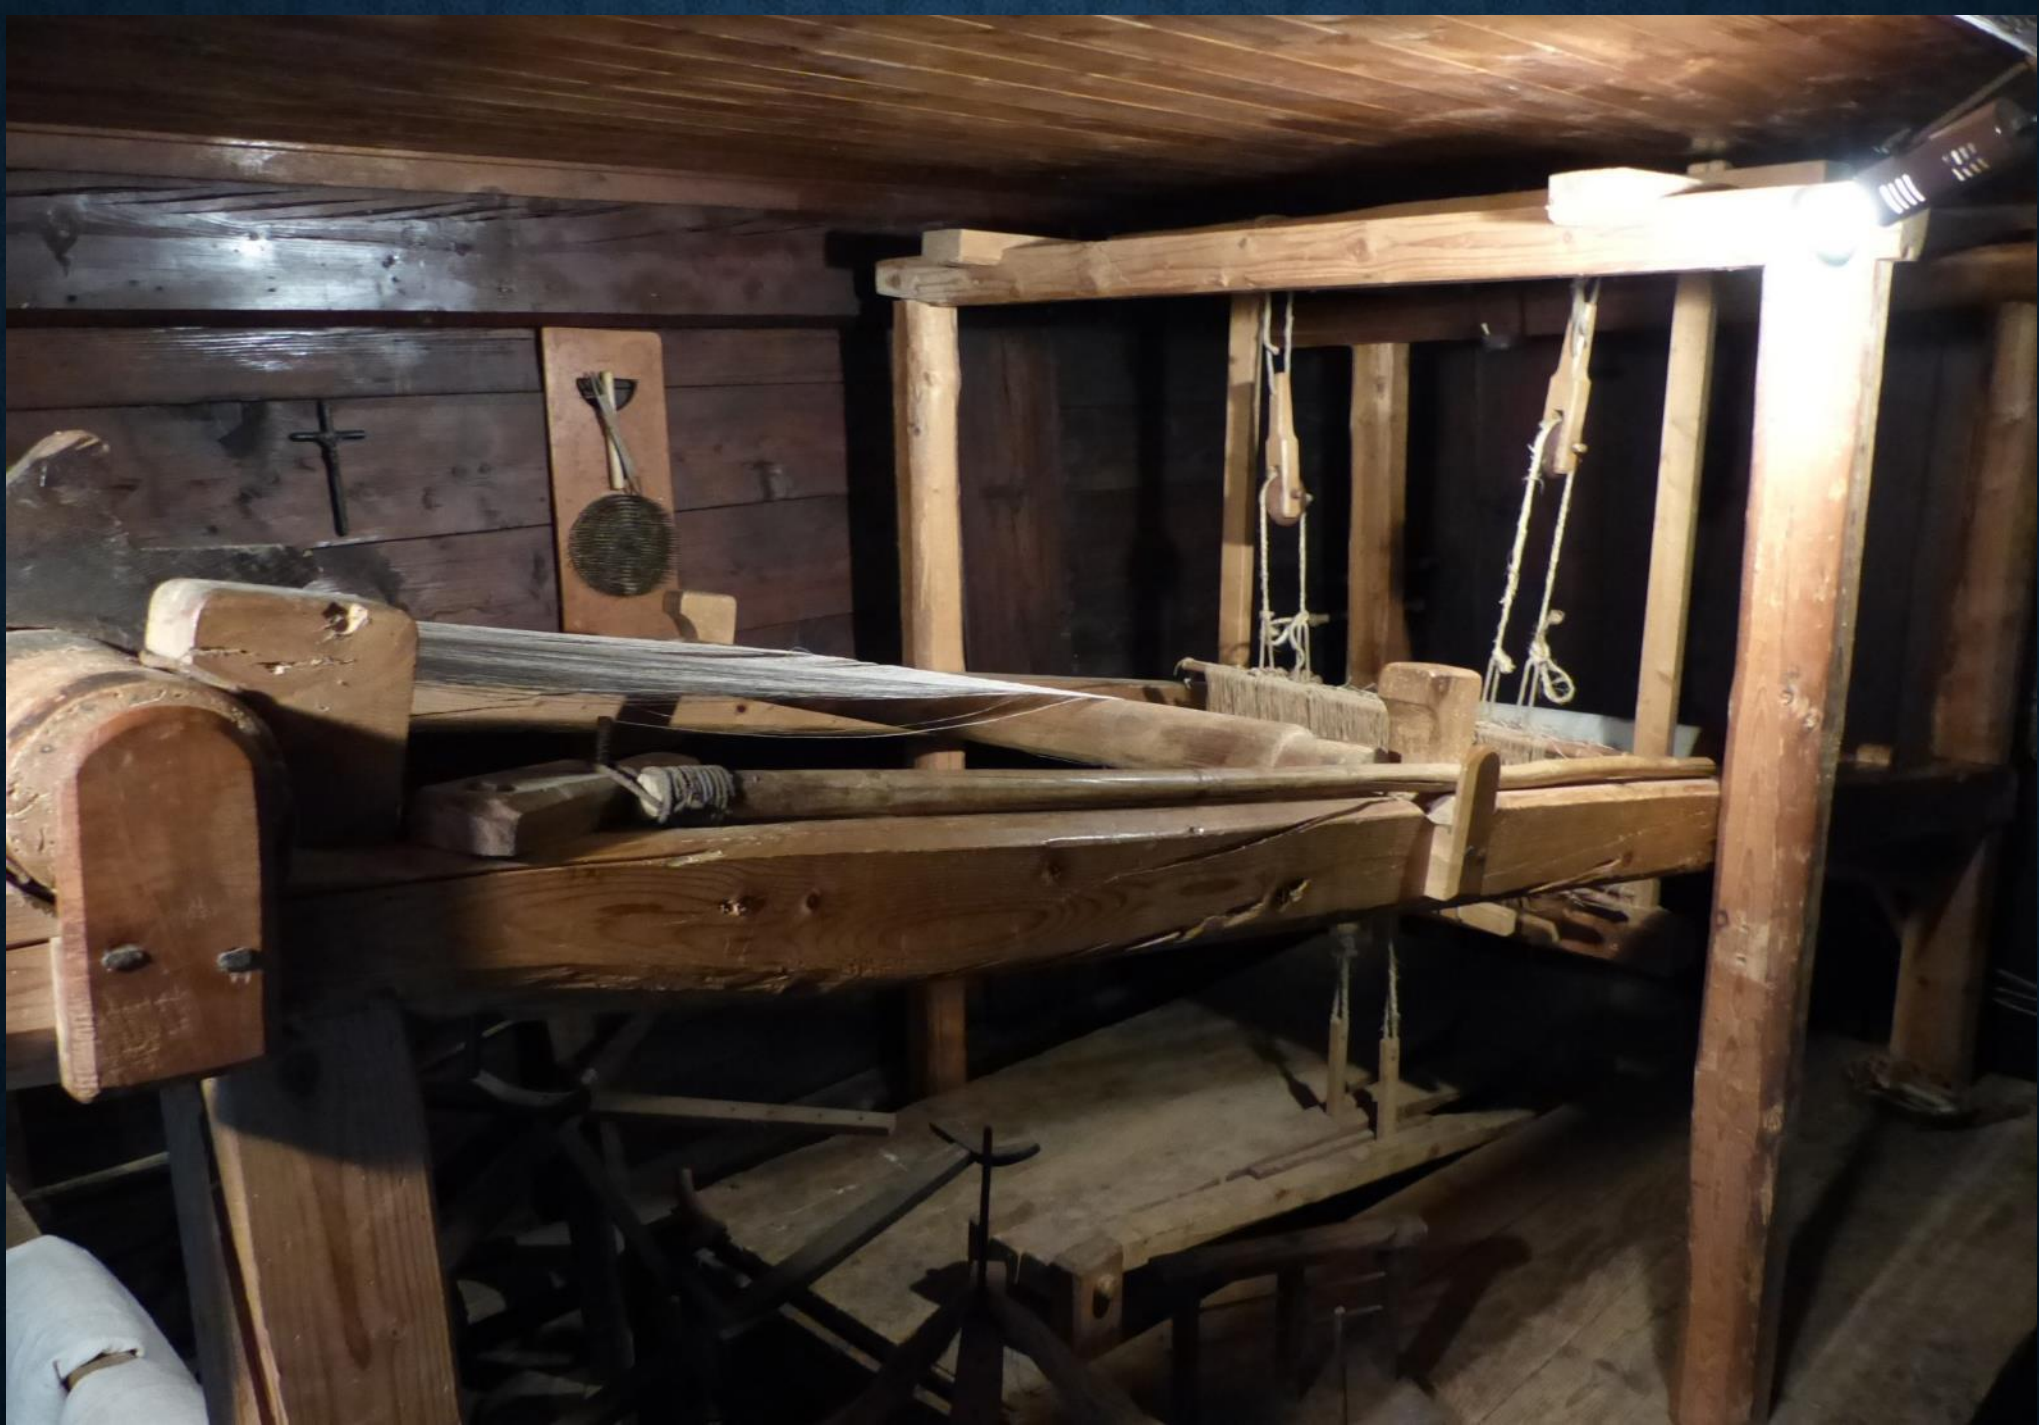



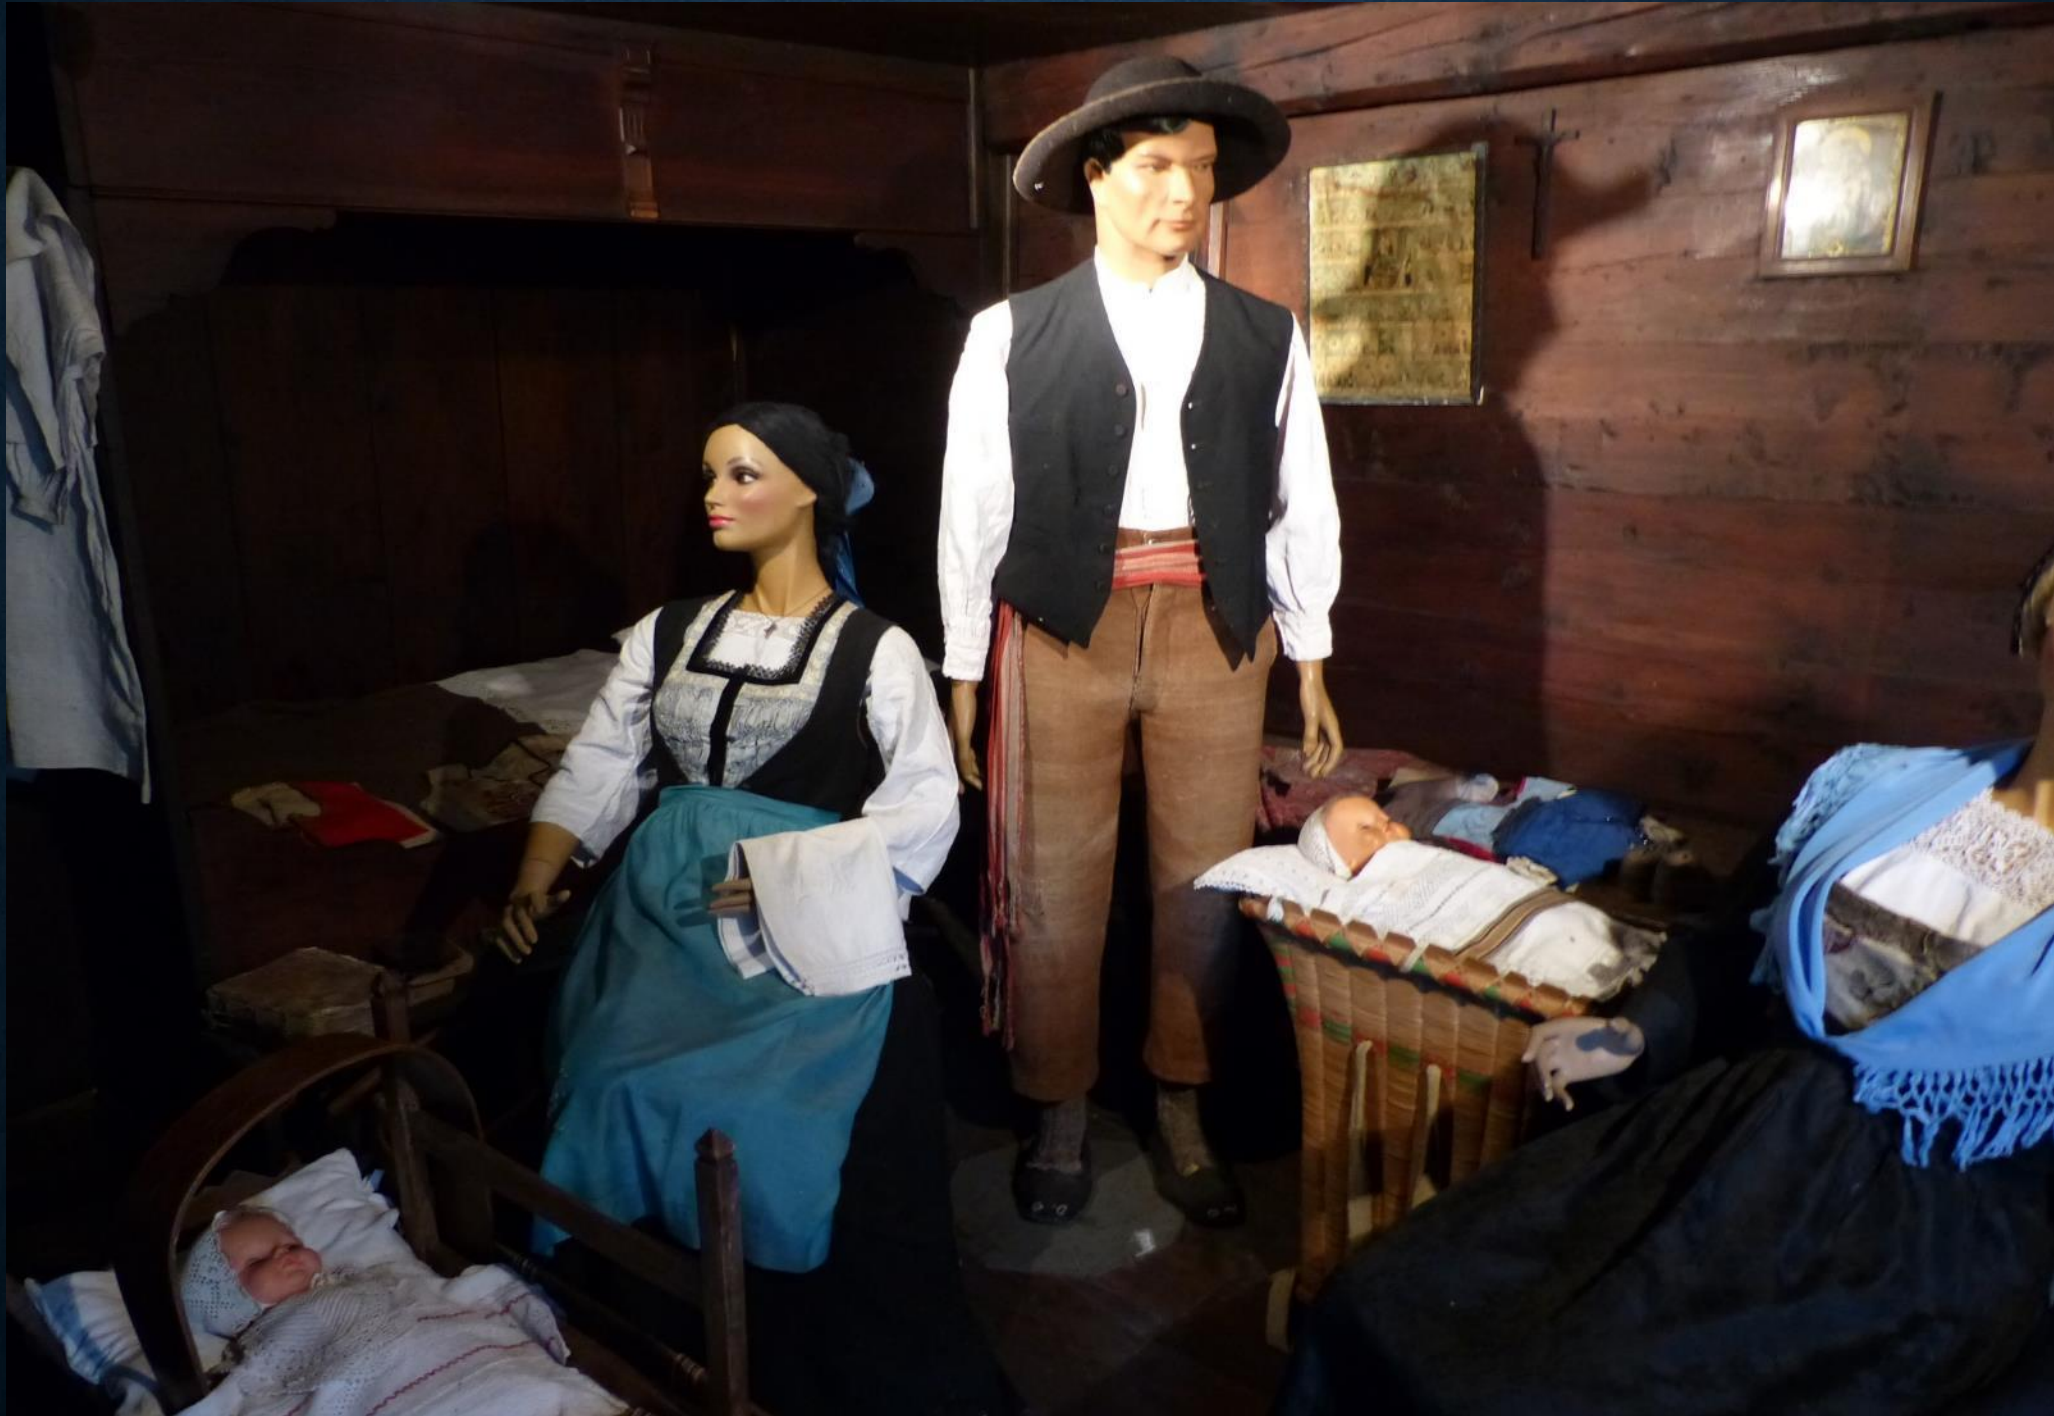



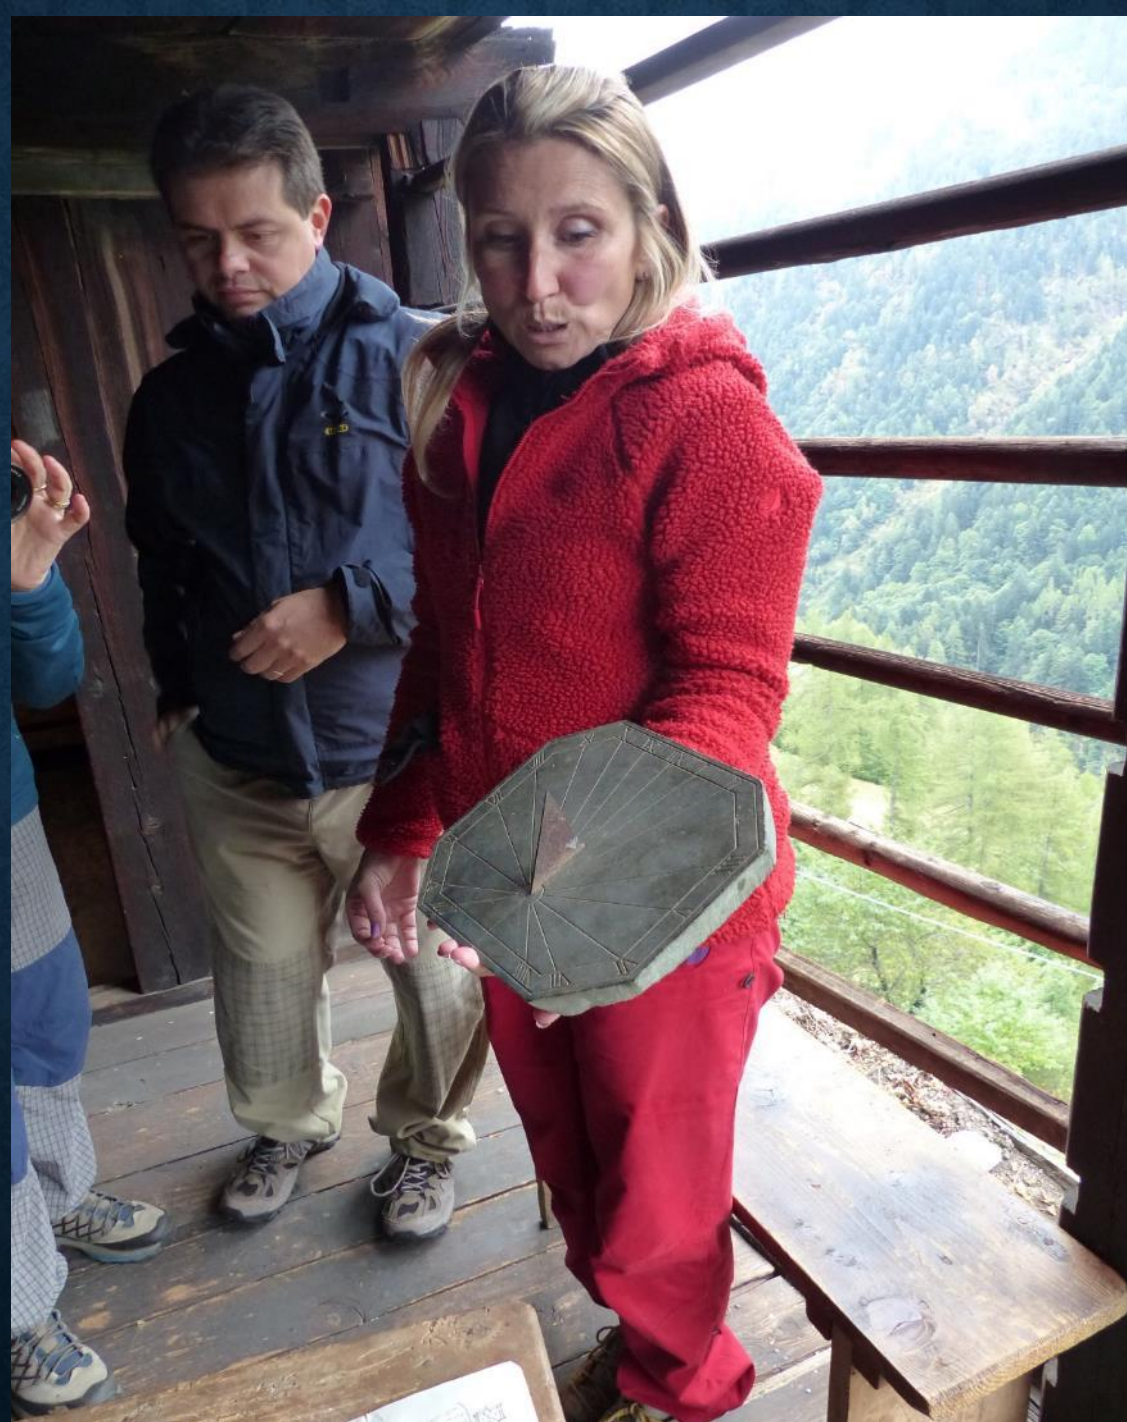



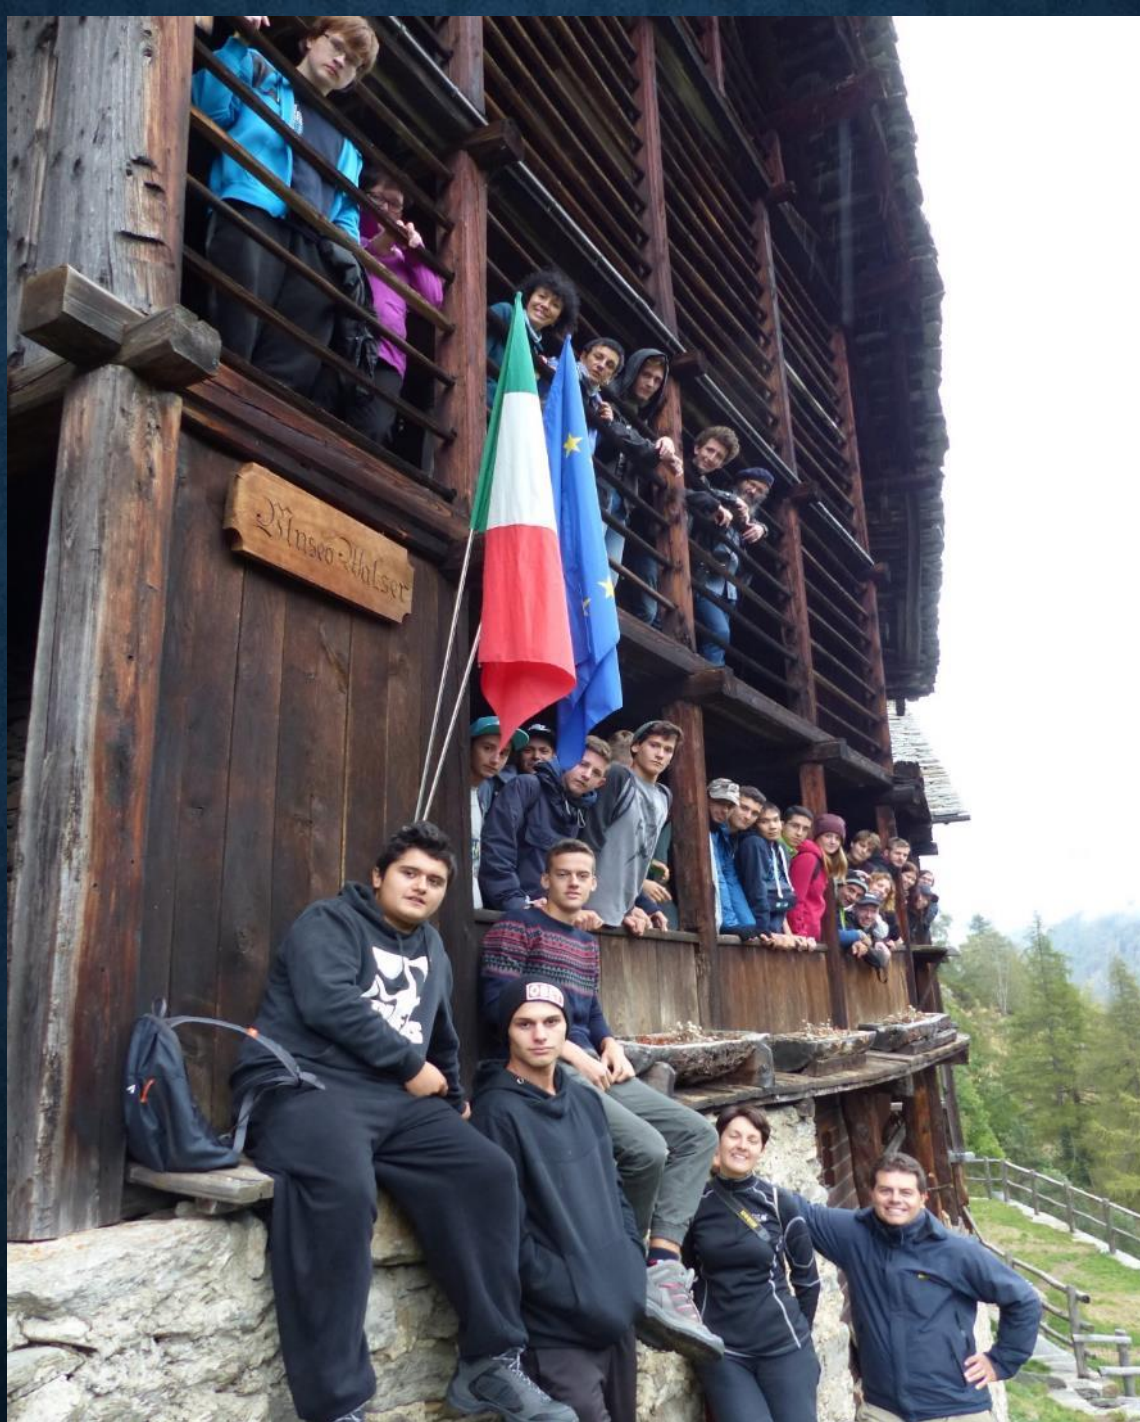



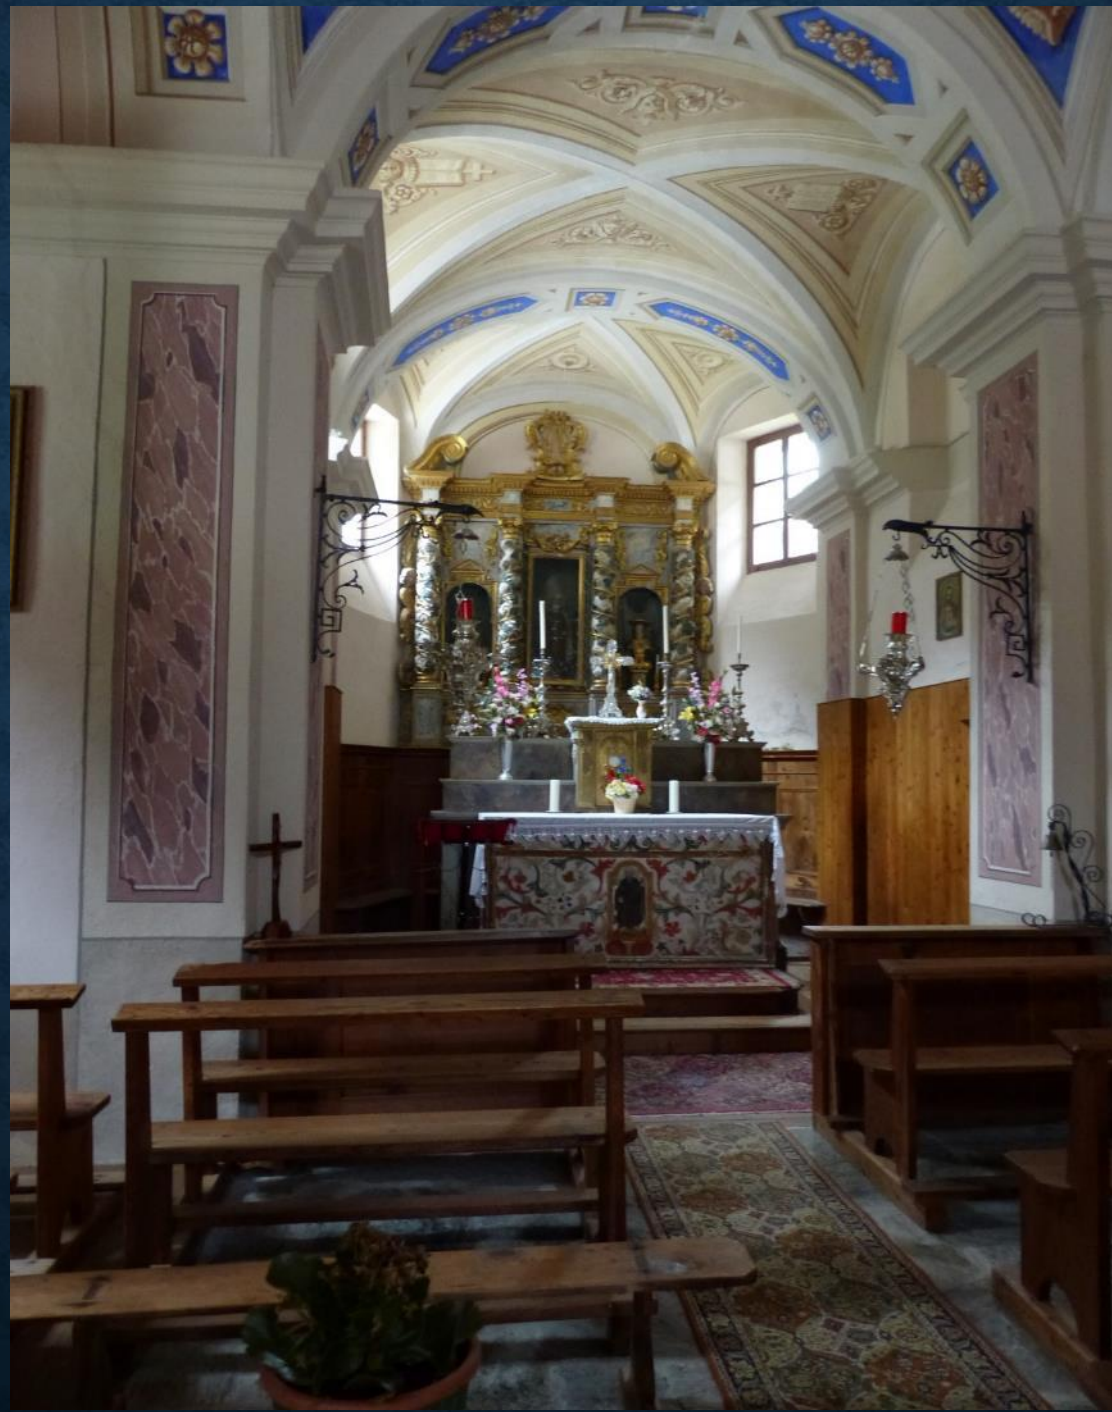



# La Minéra Hostel in Alagna Valsesia

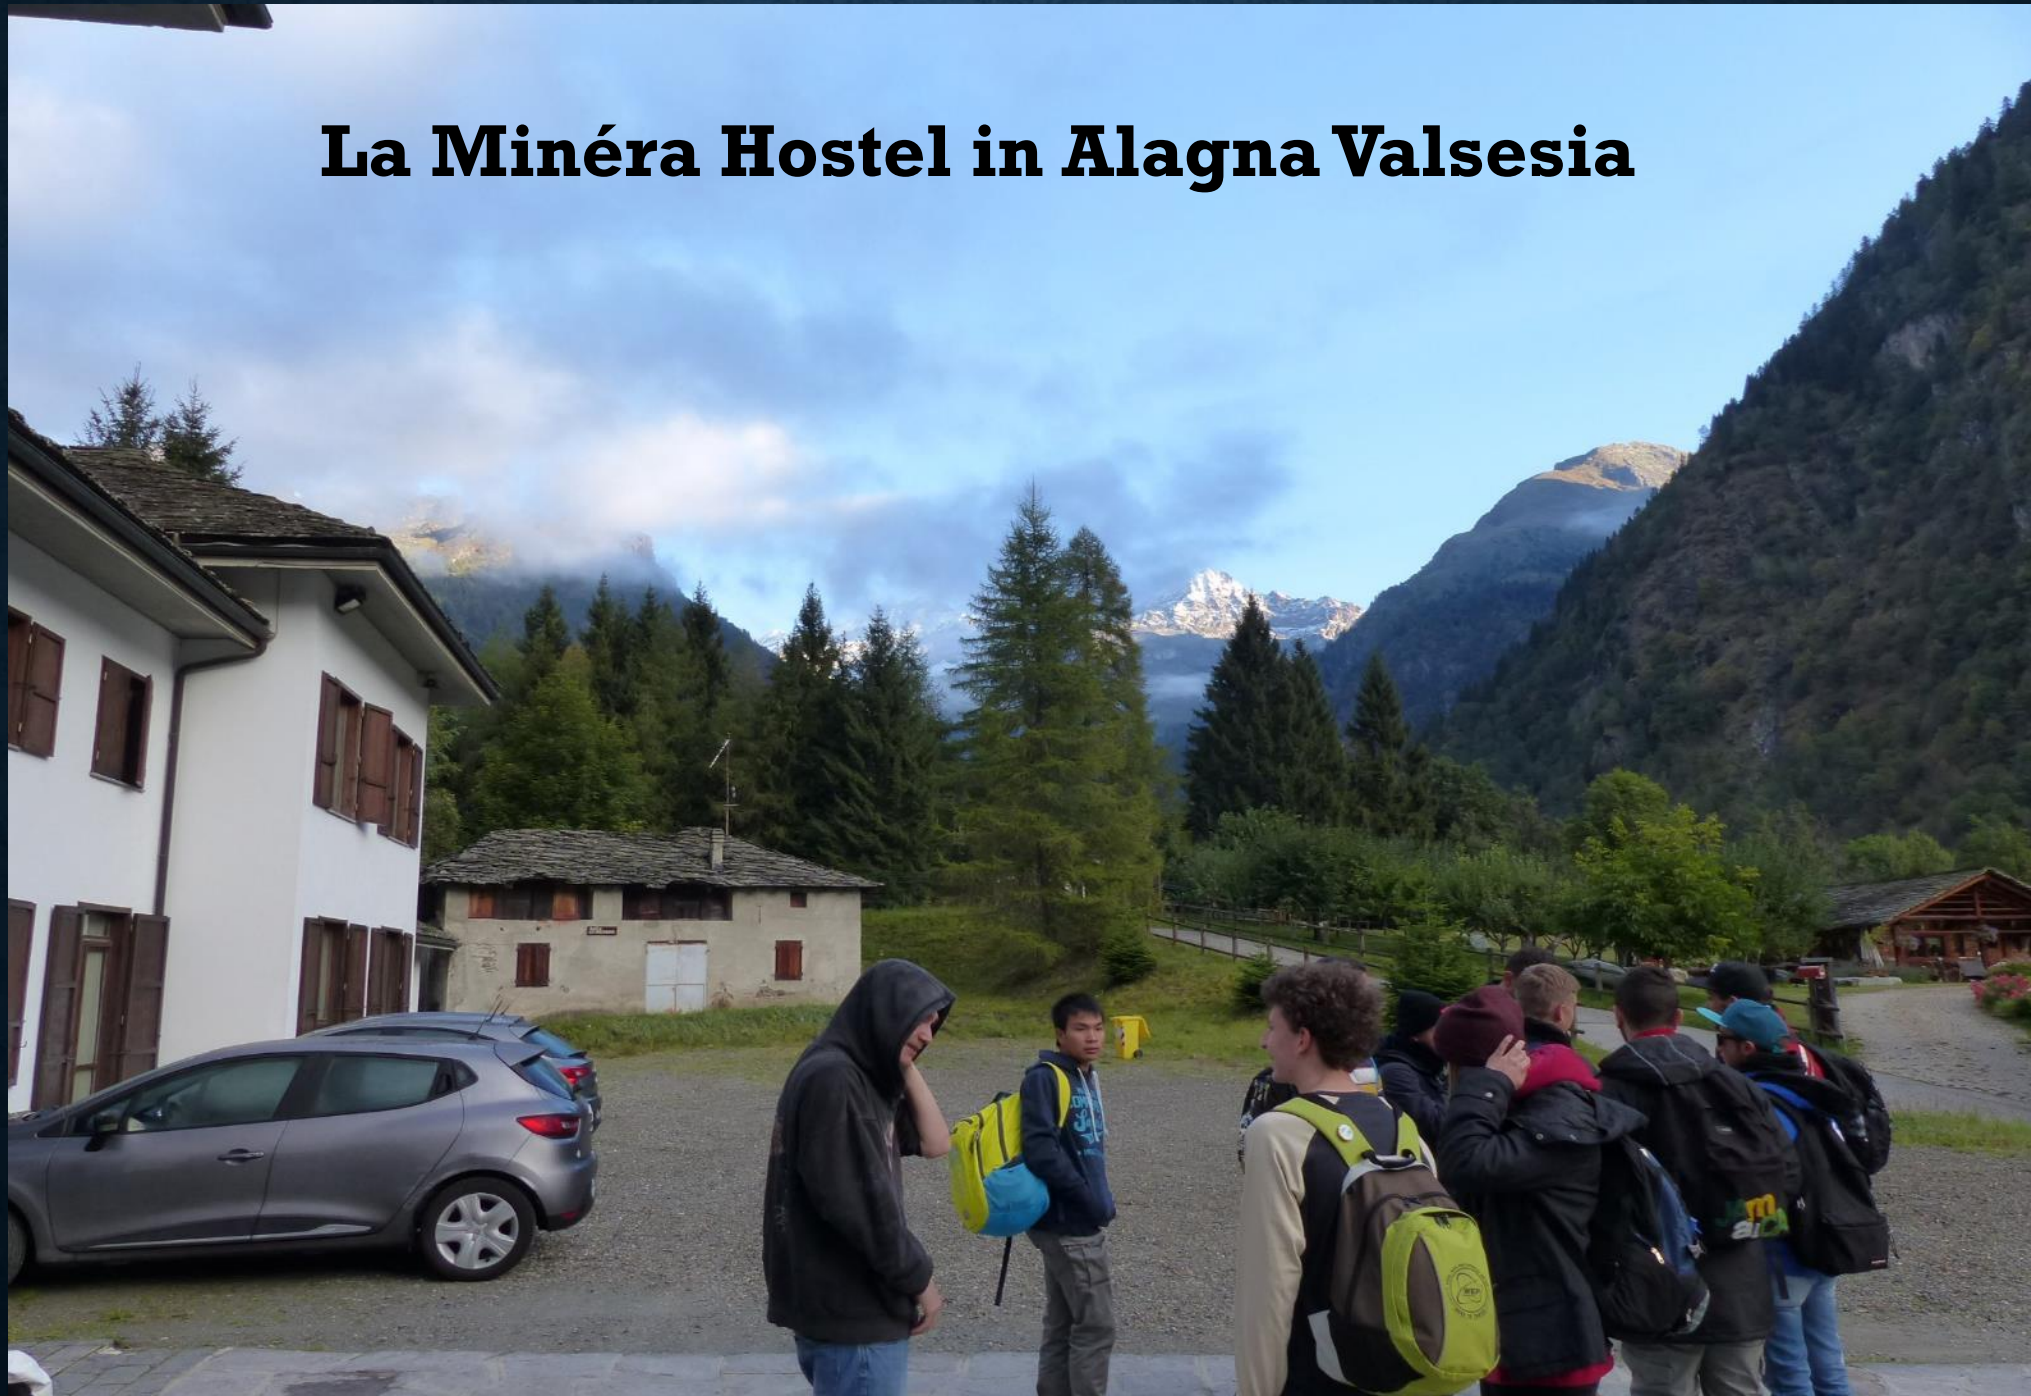



# Waiting for the cable car

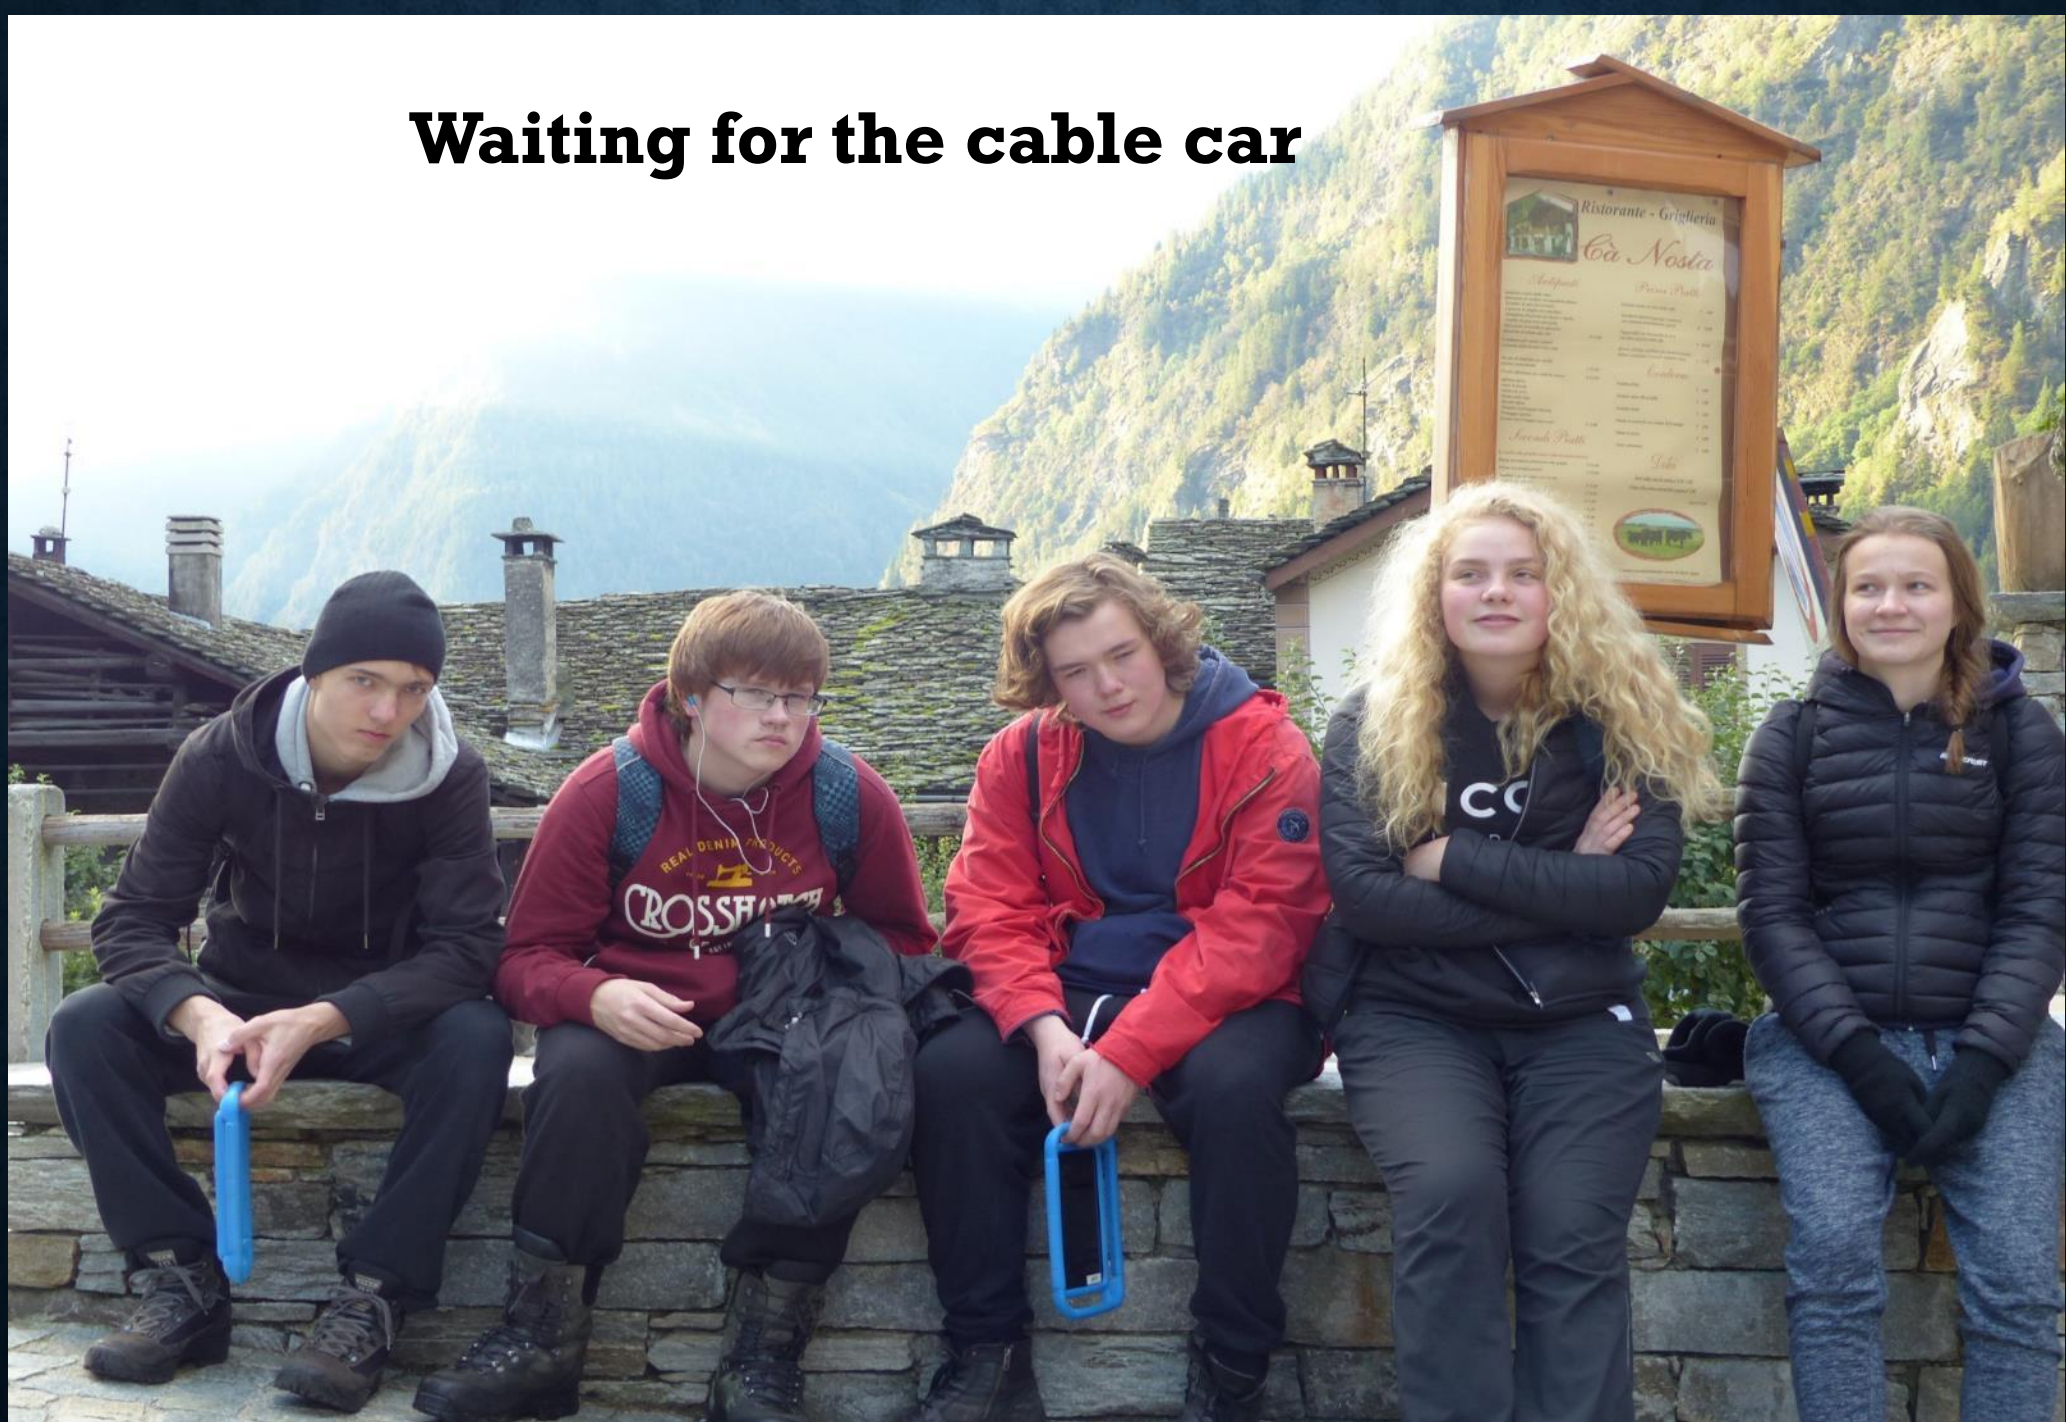



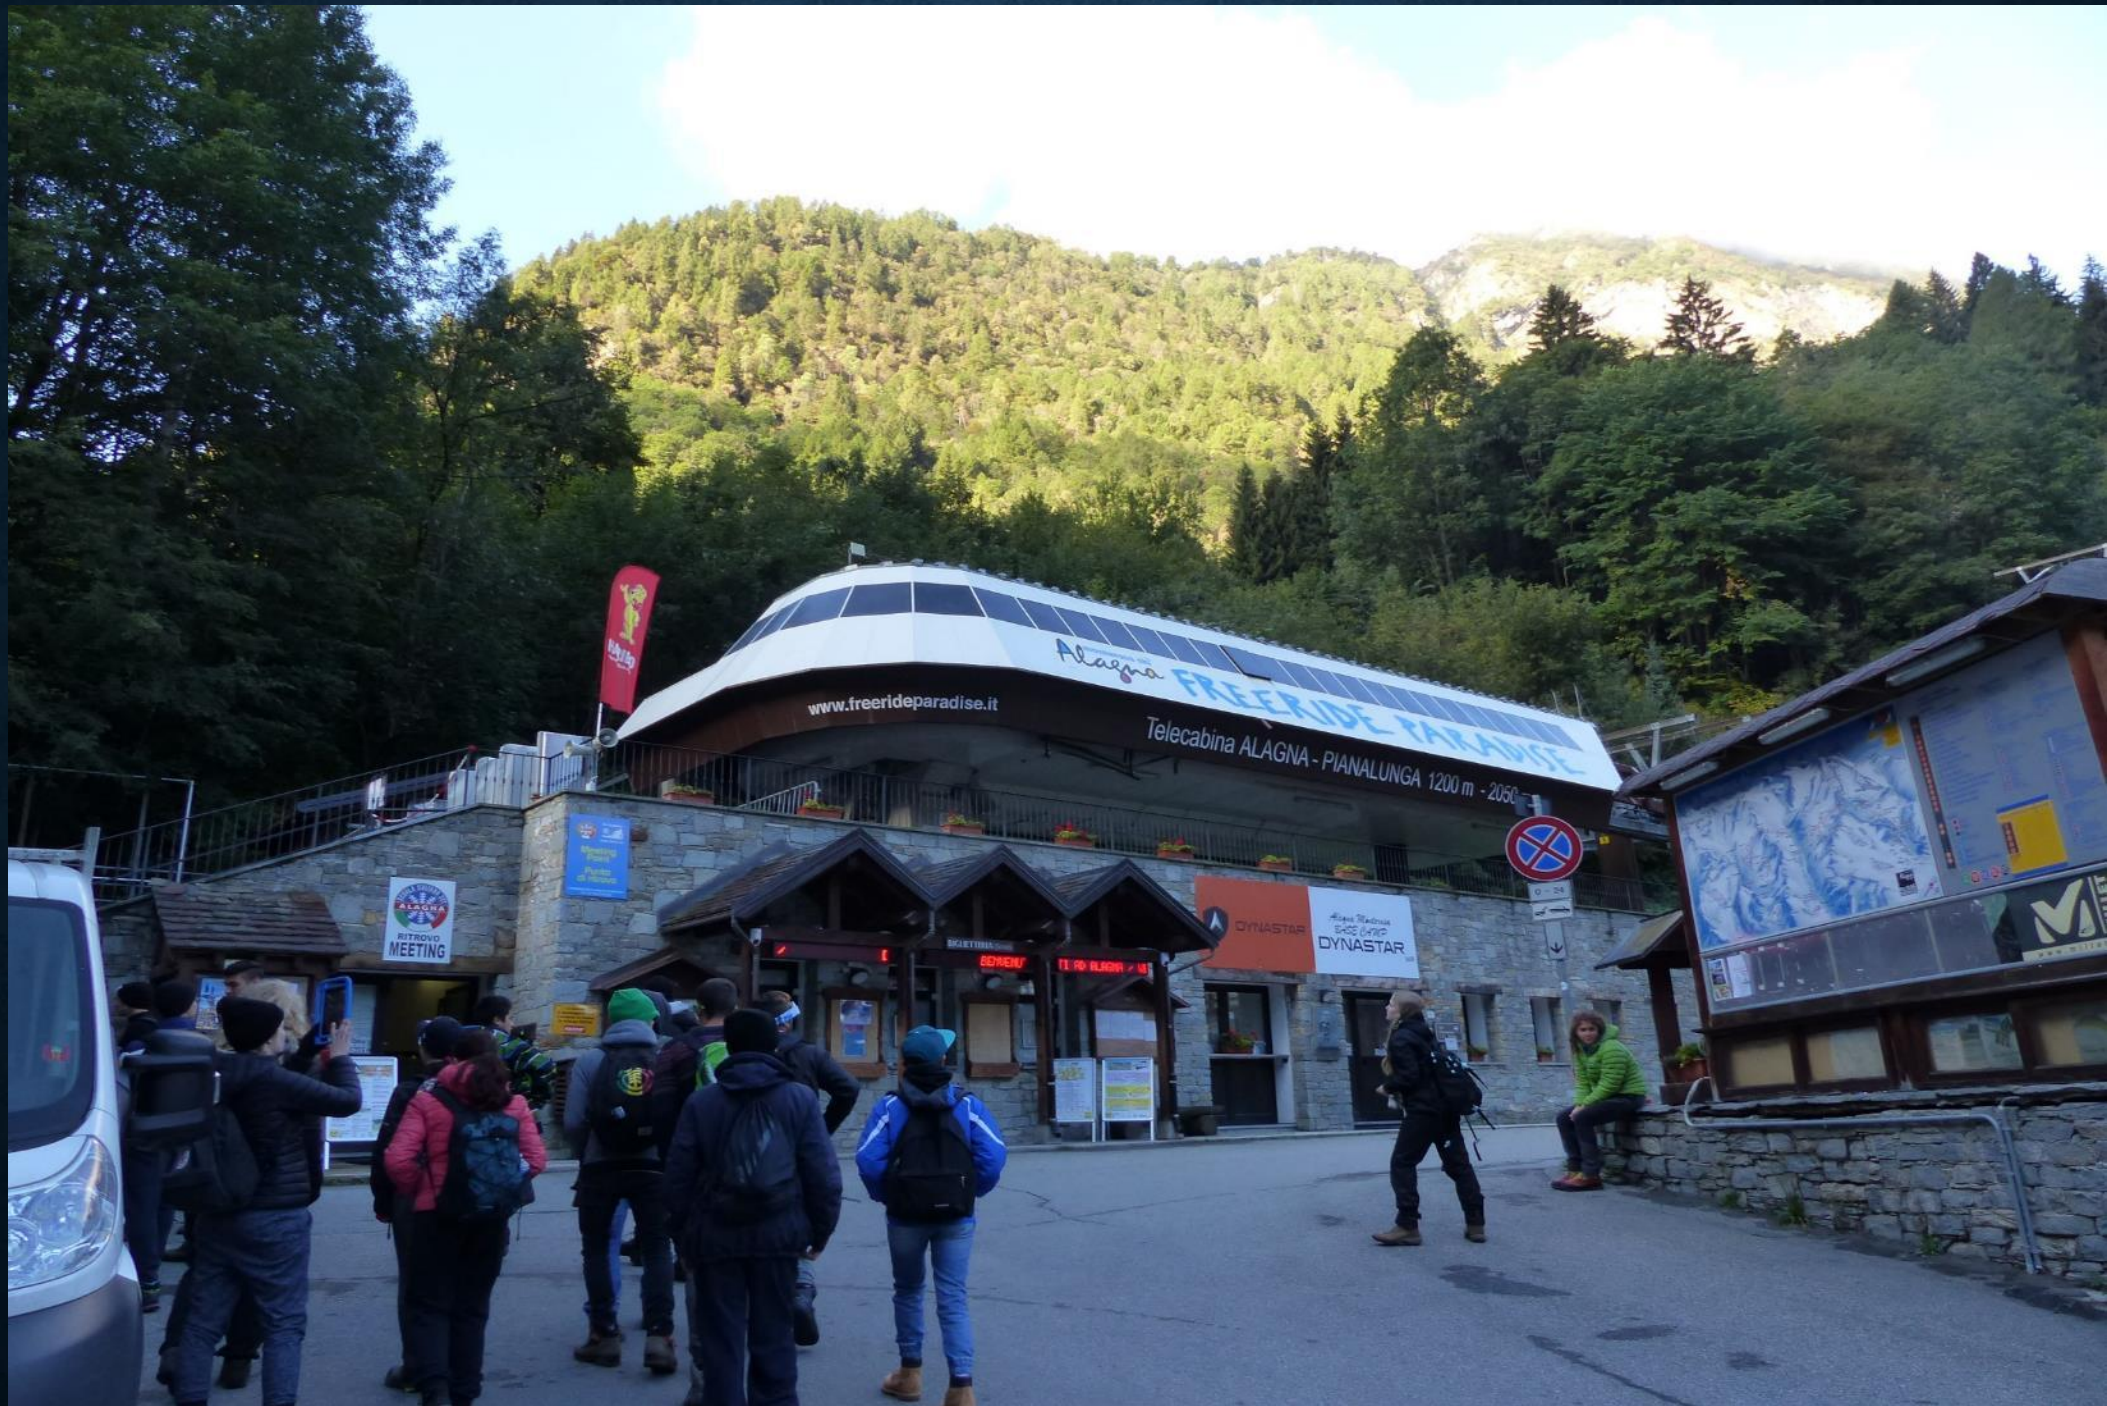



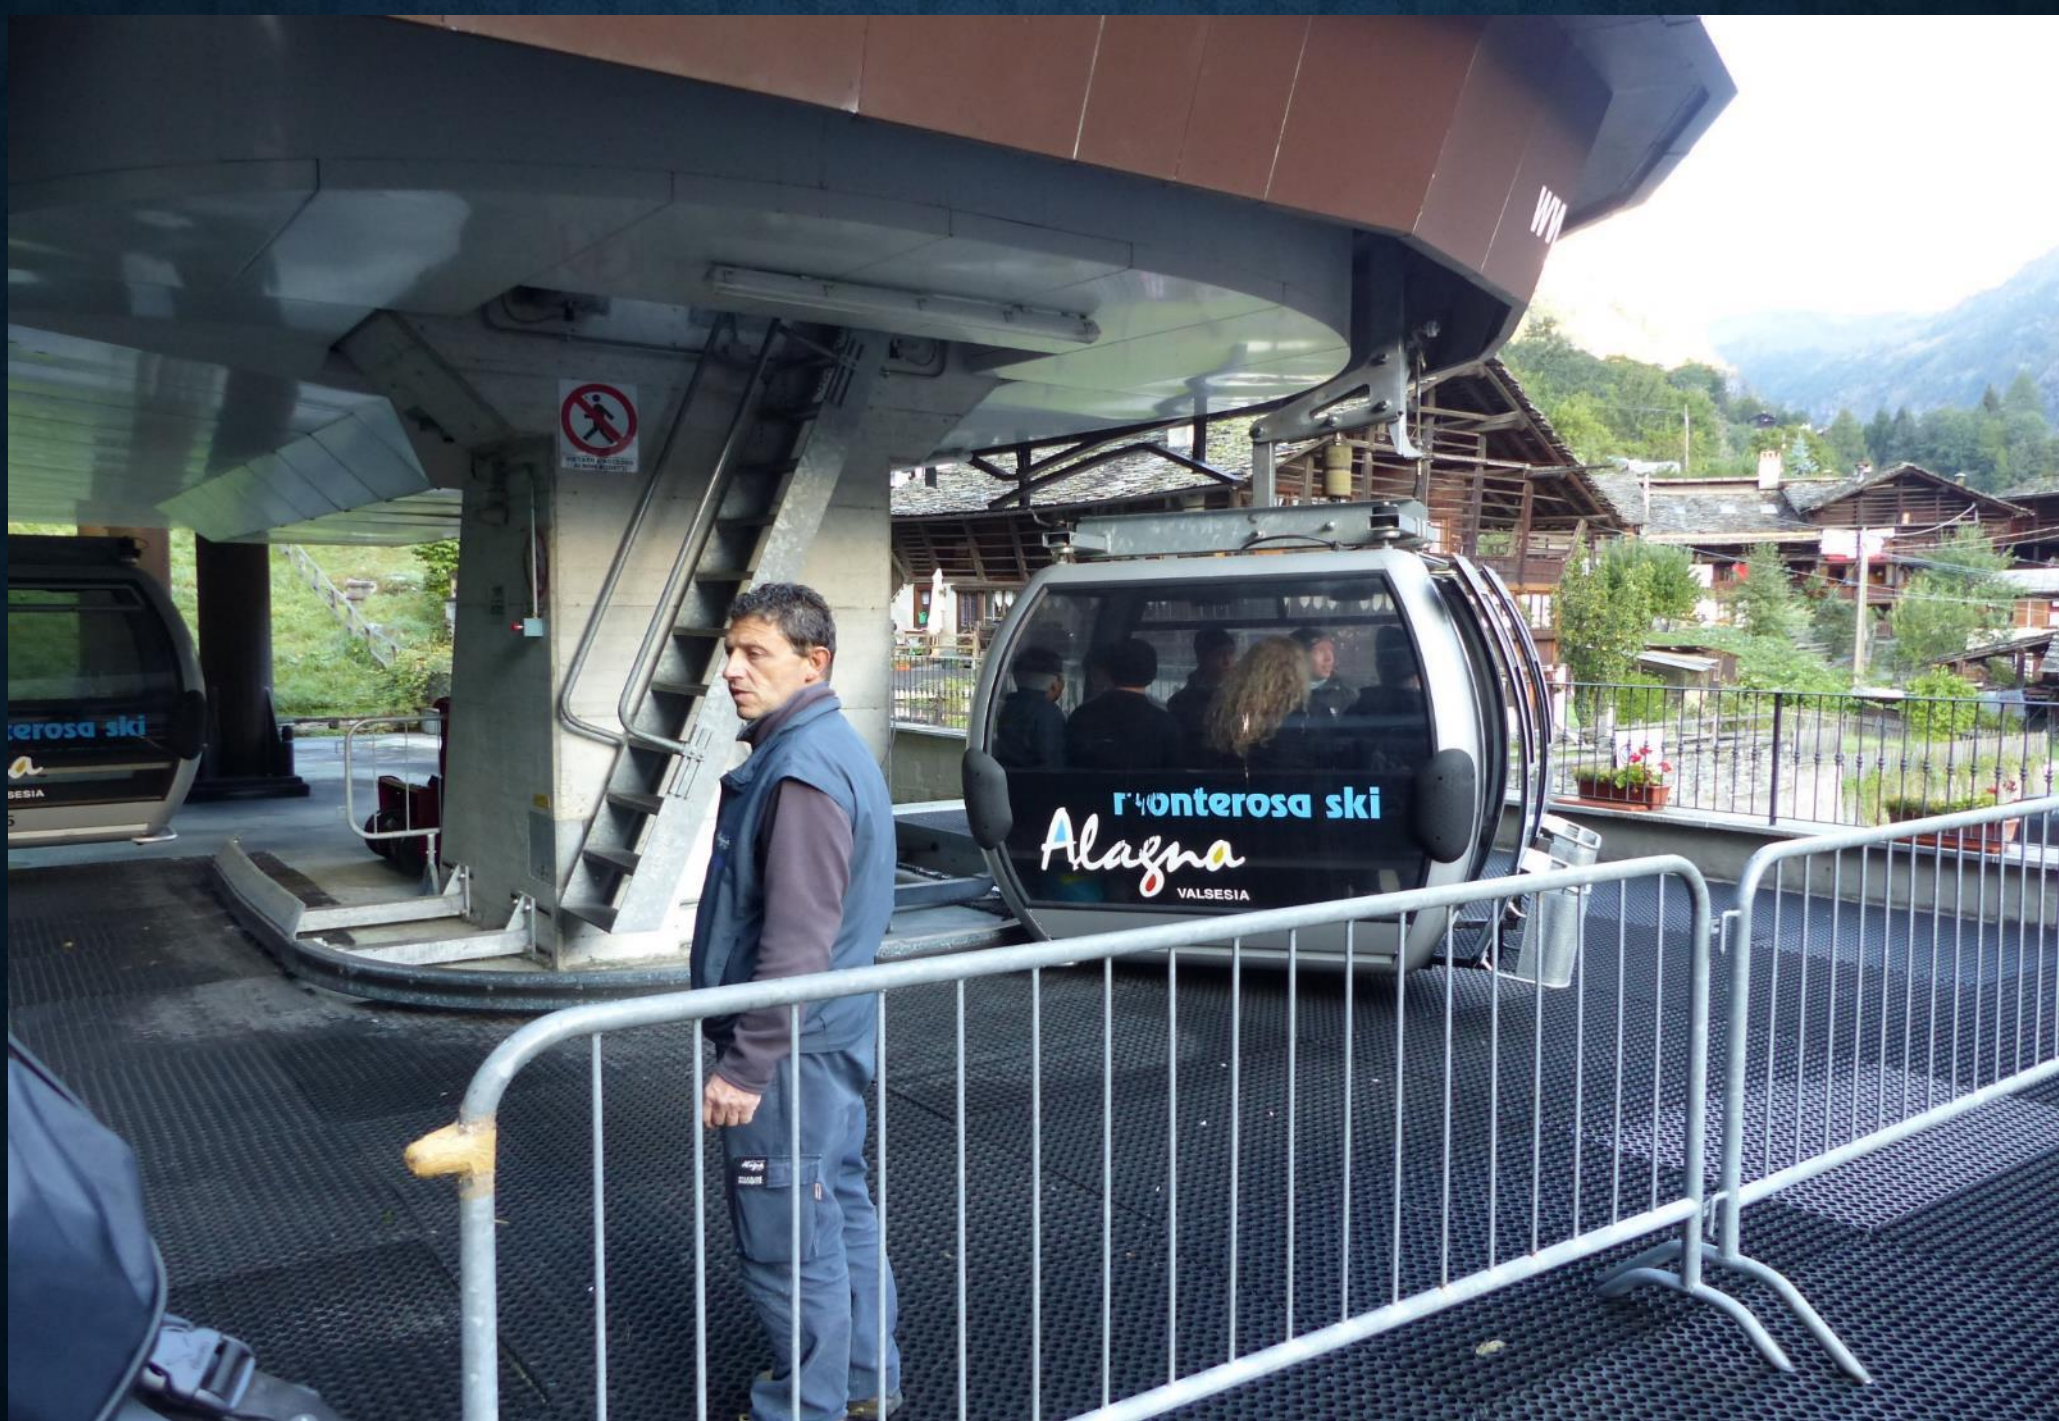



# Heading for Monte Rosa and the Mosso Institute

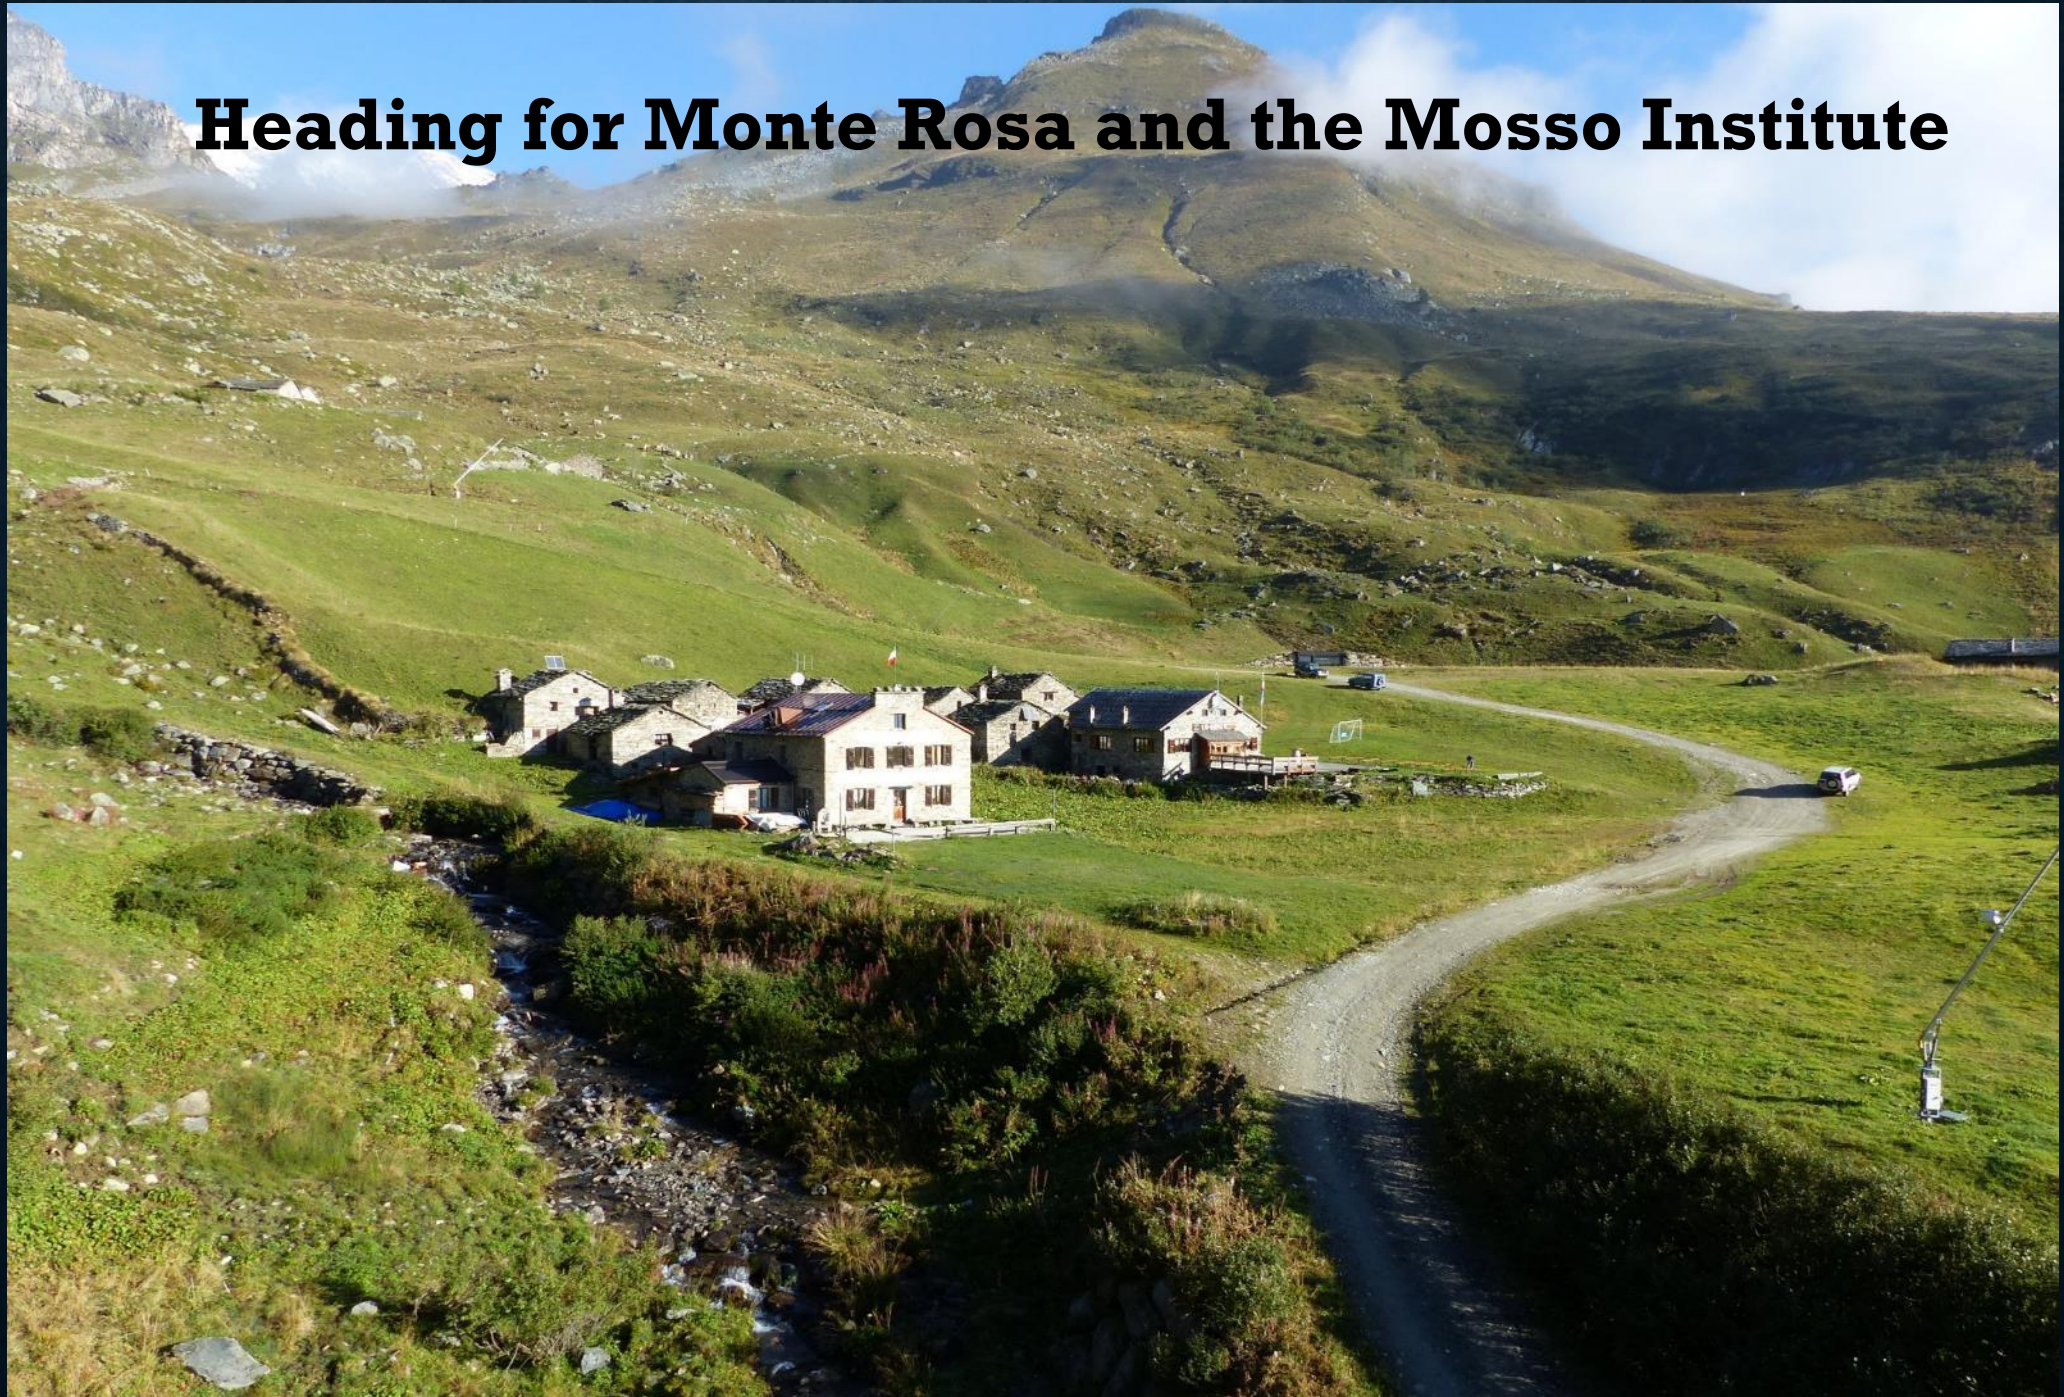



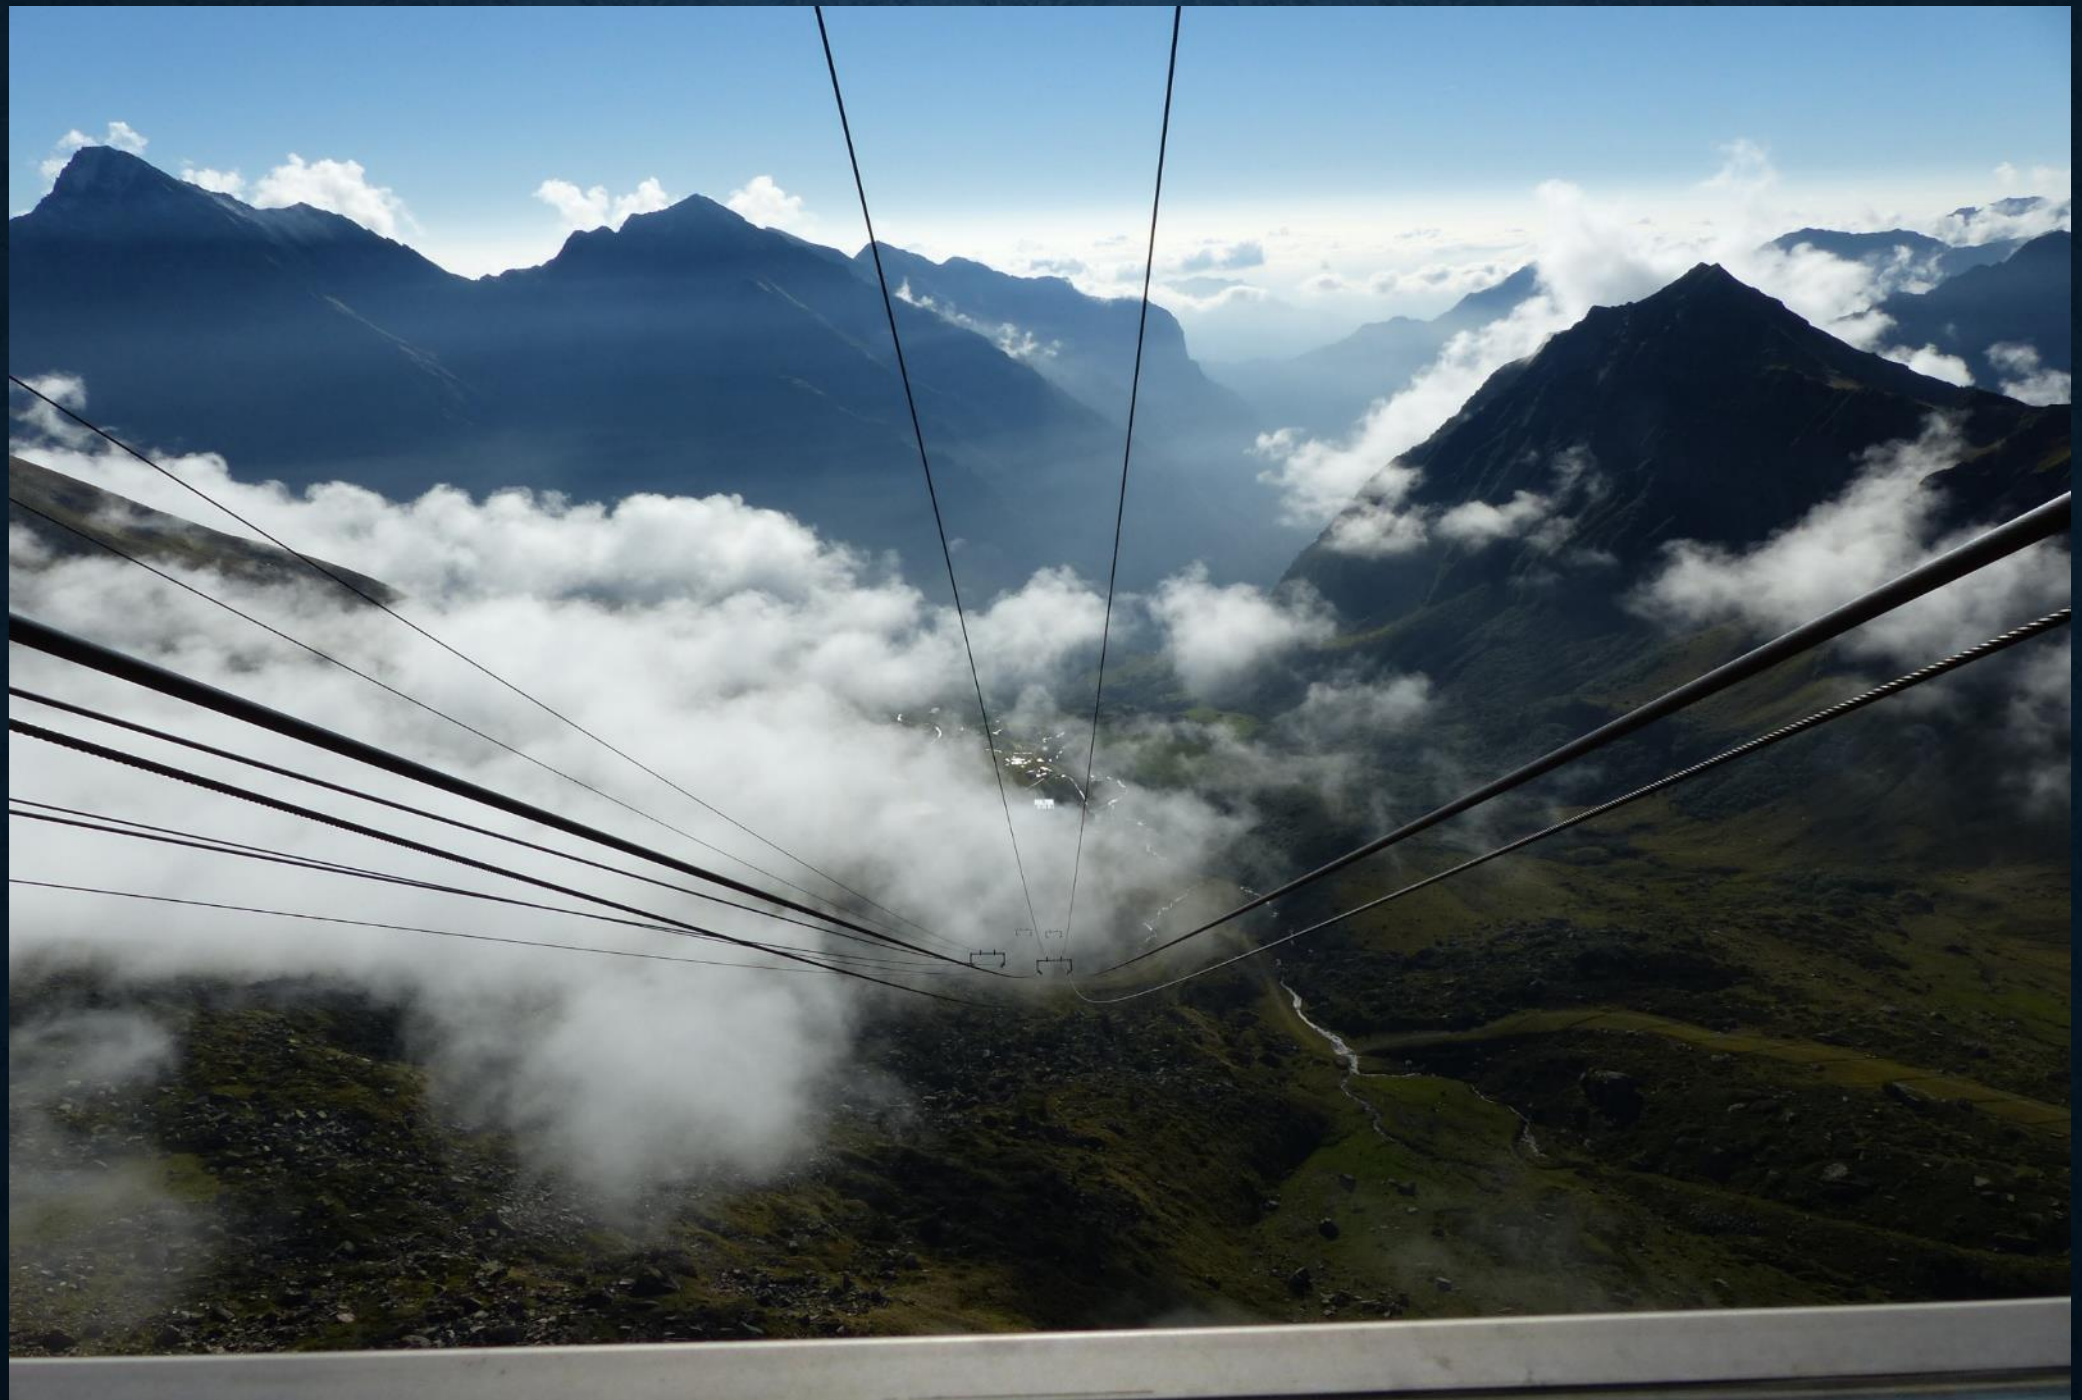



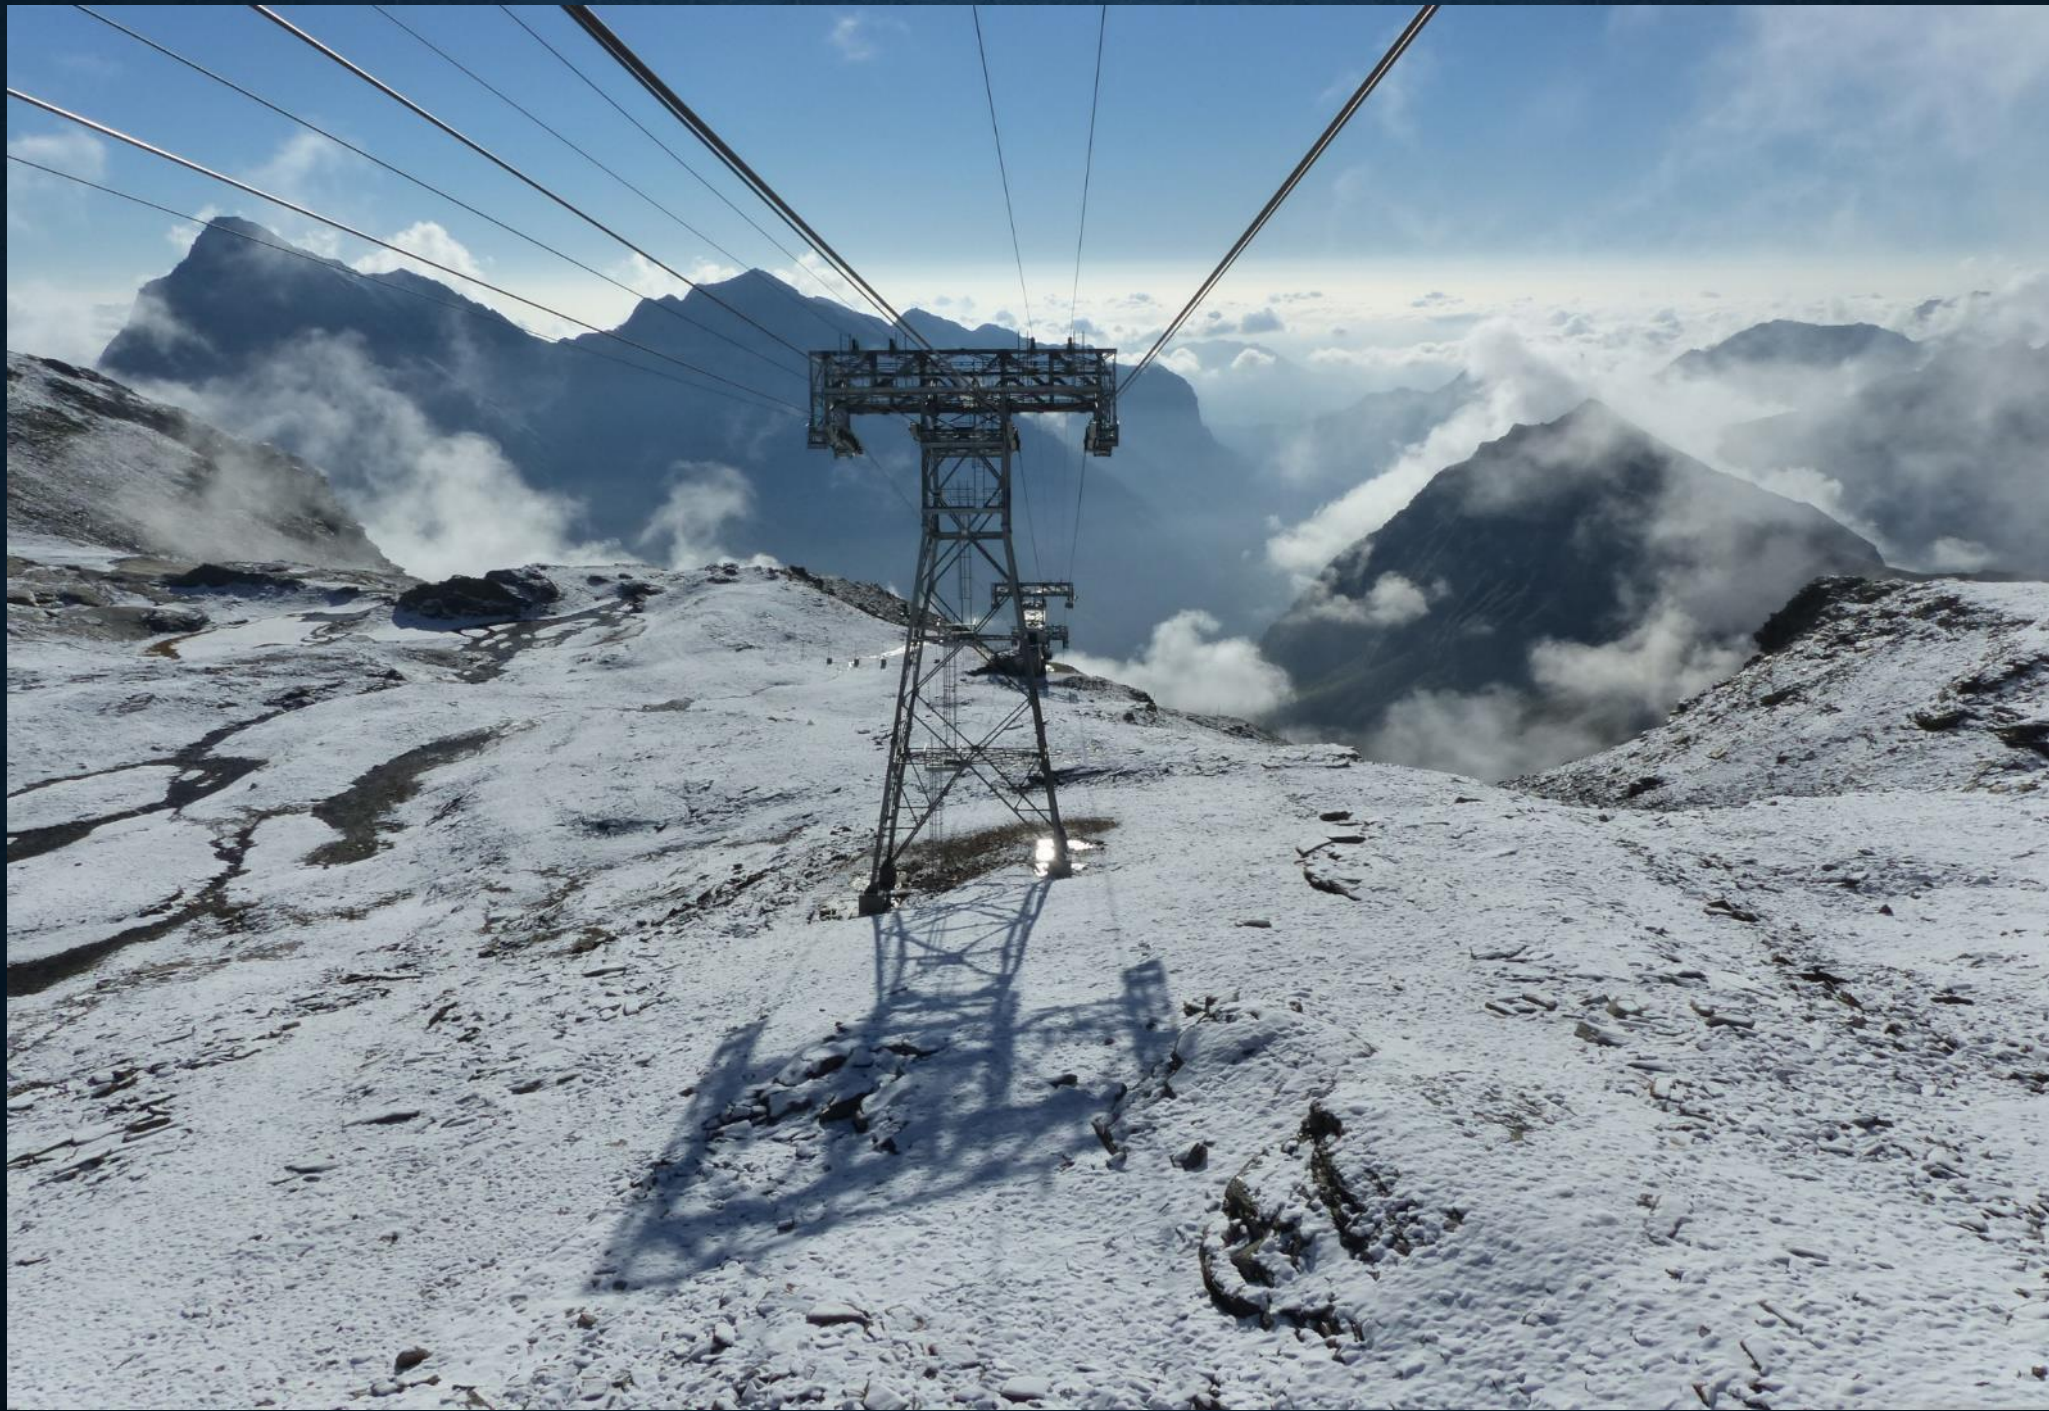



# Passo dei Salati

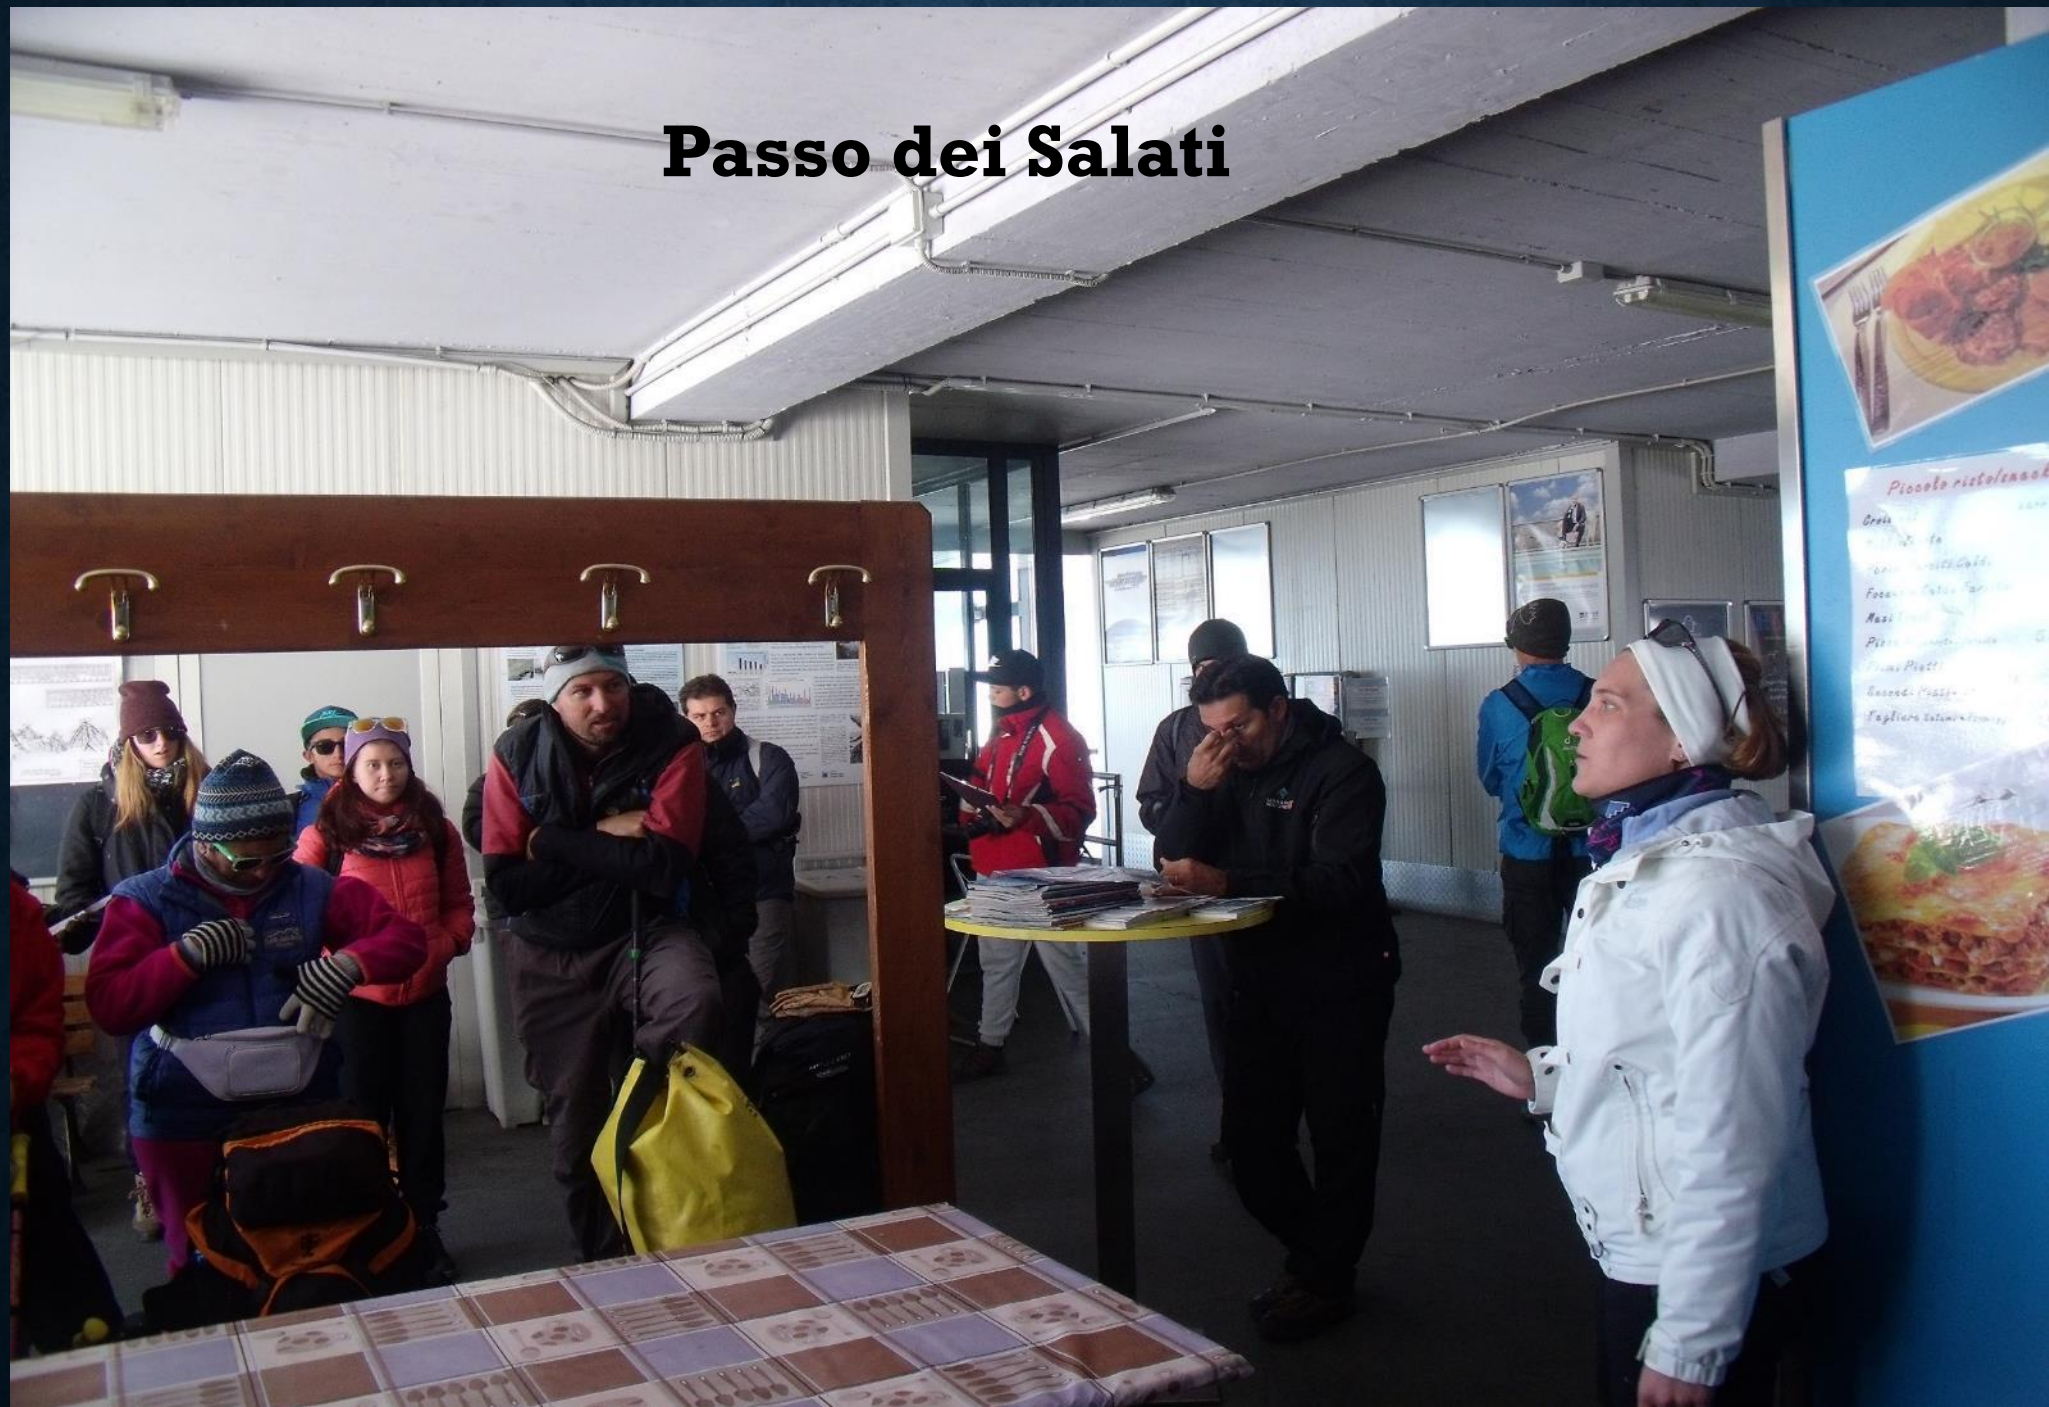



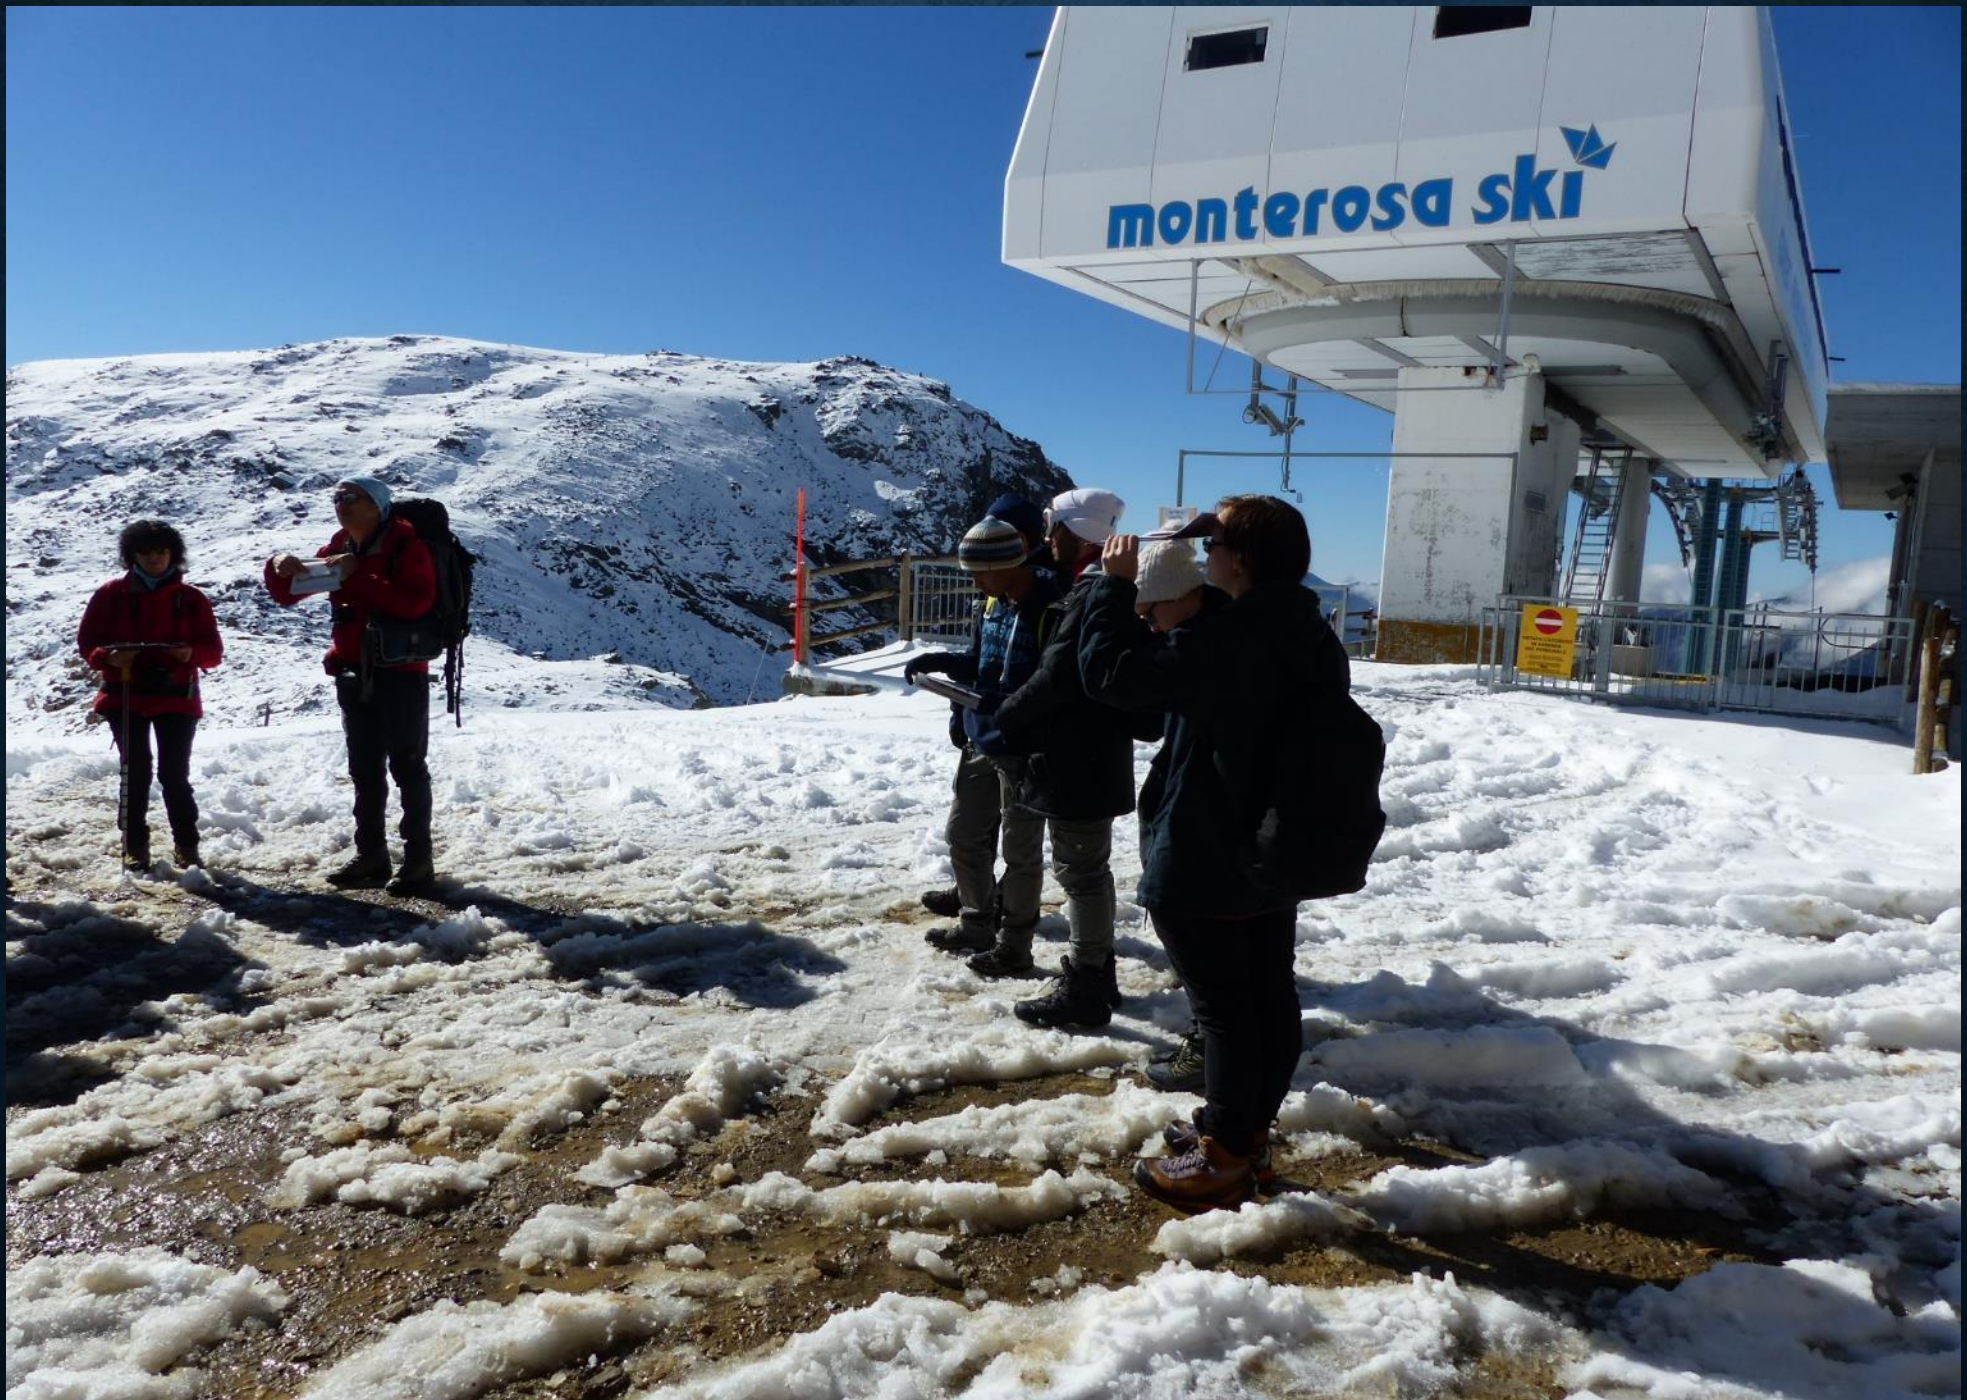



# Monte Rosa

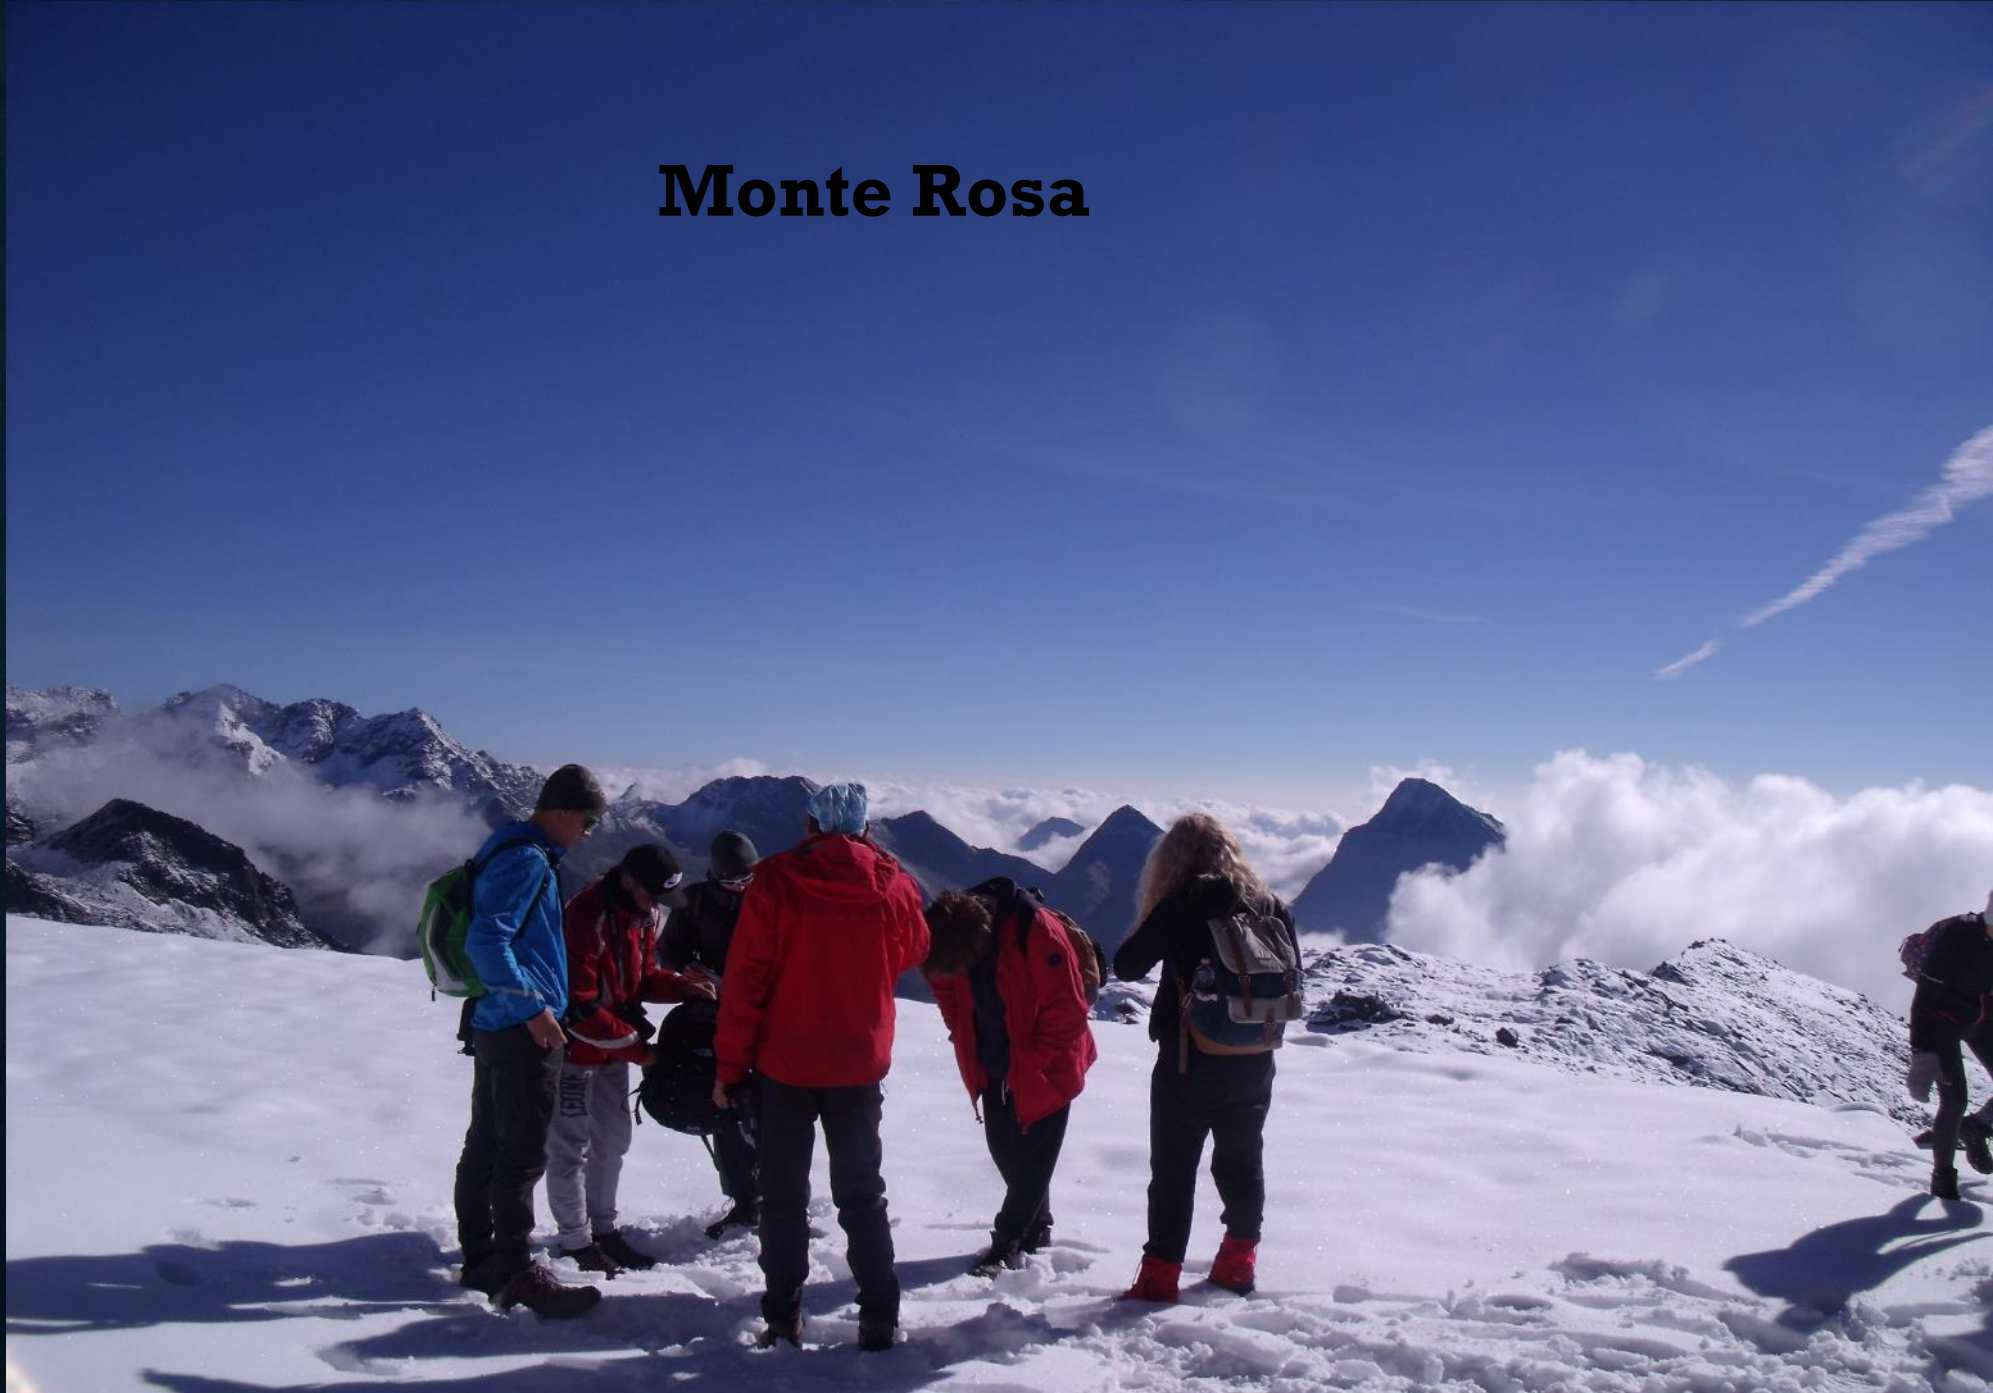



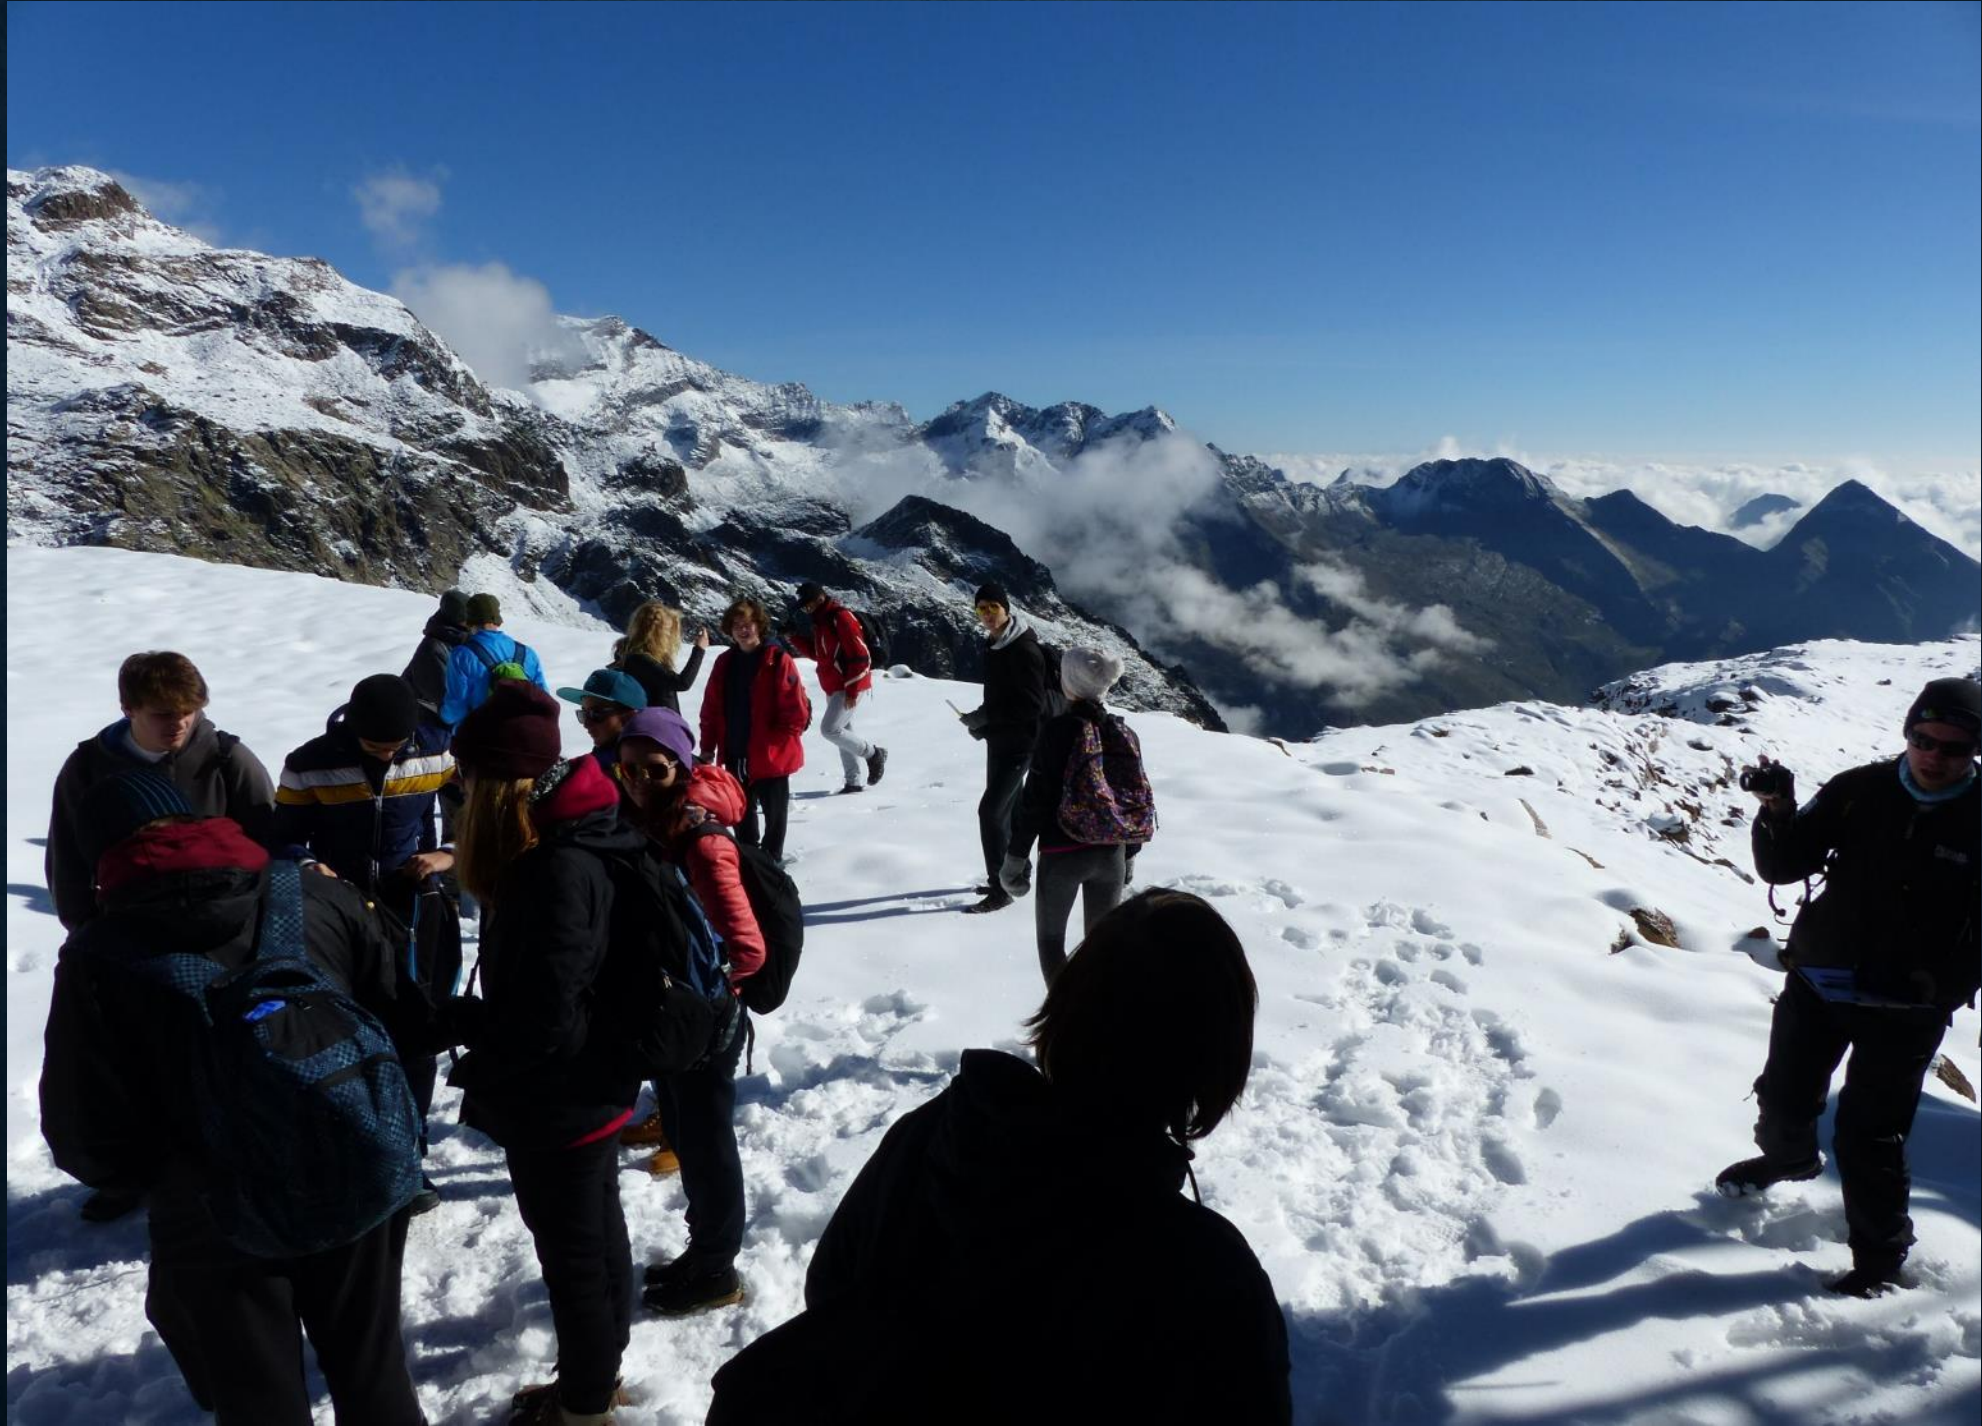



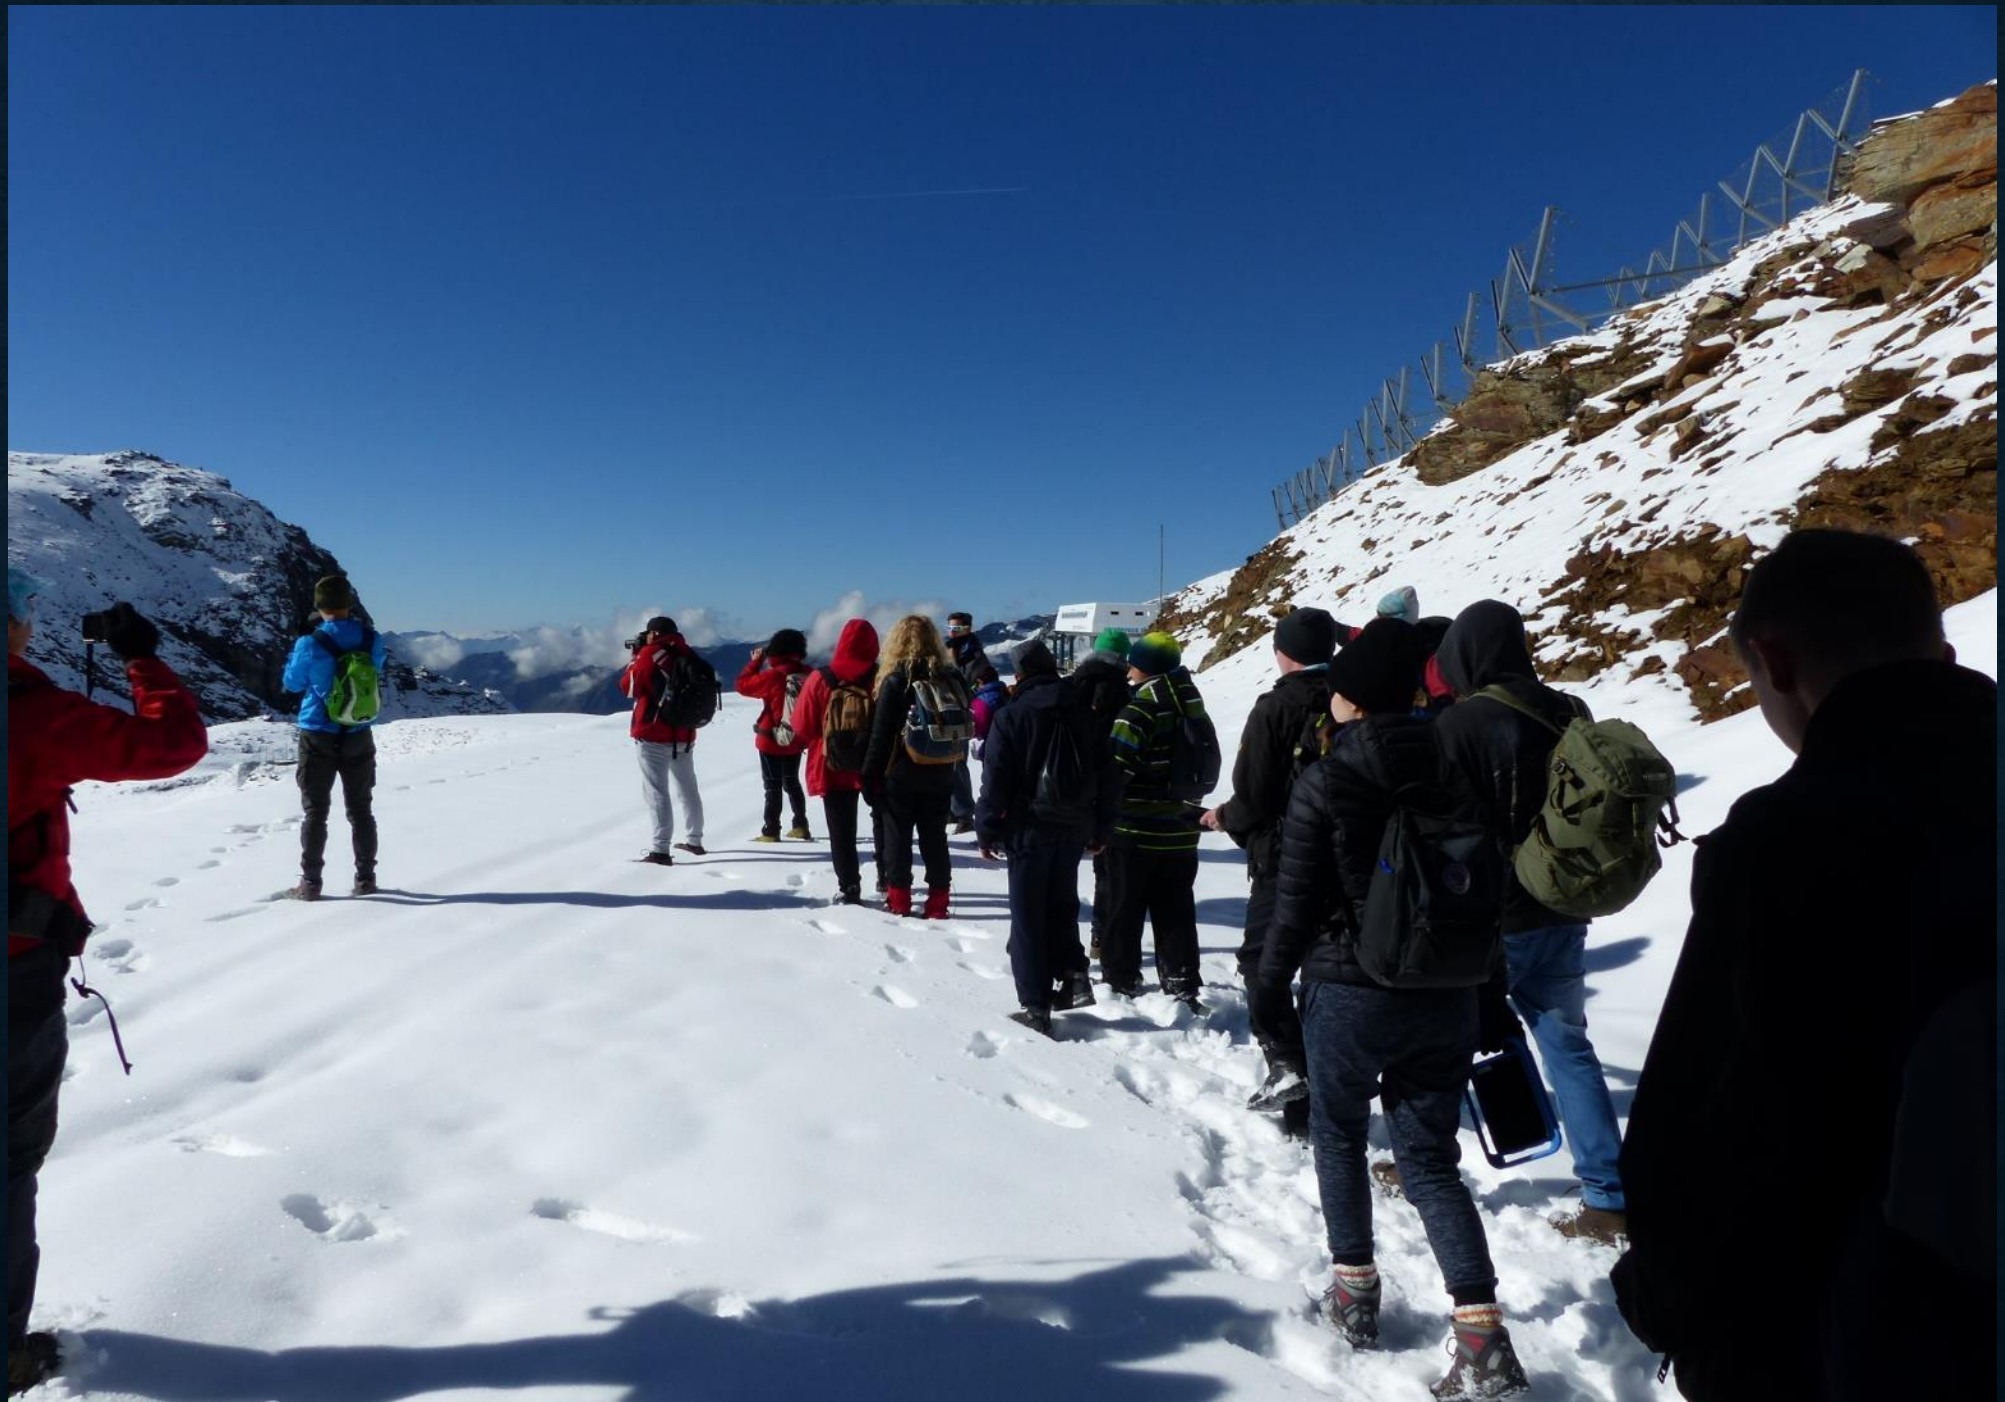



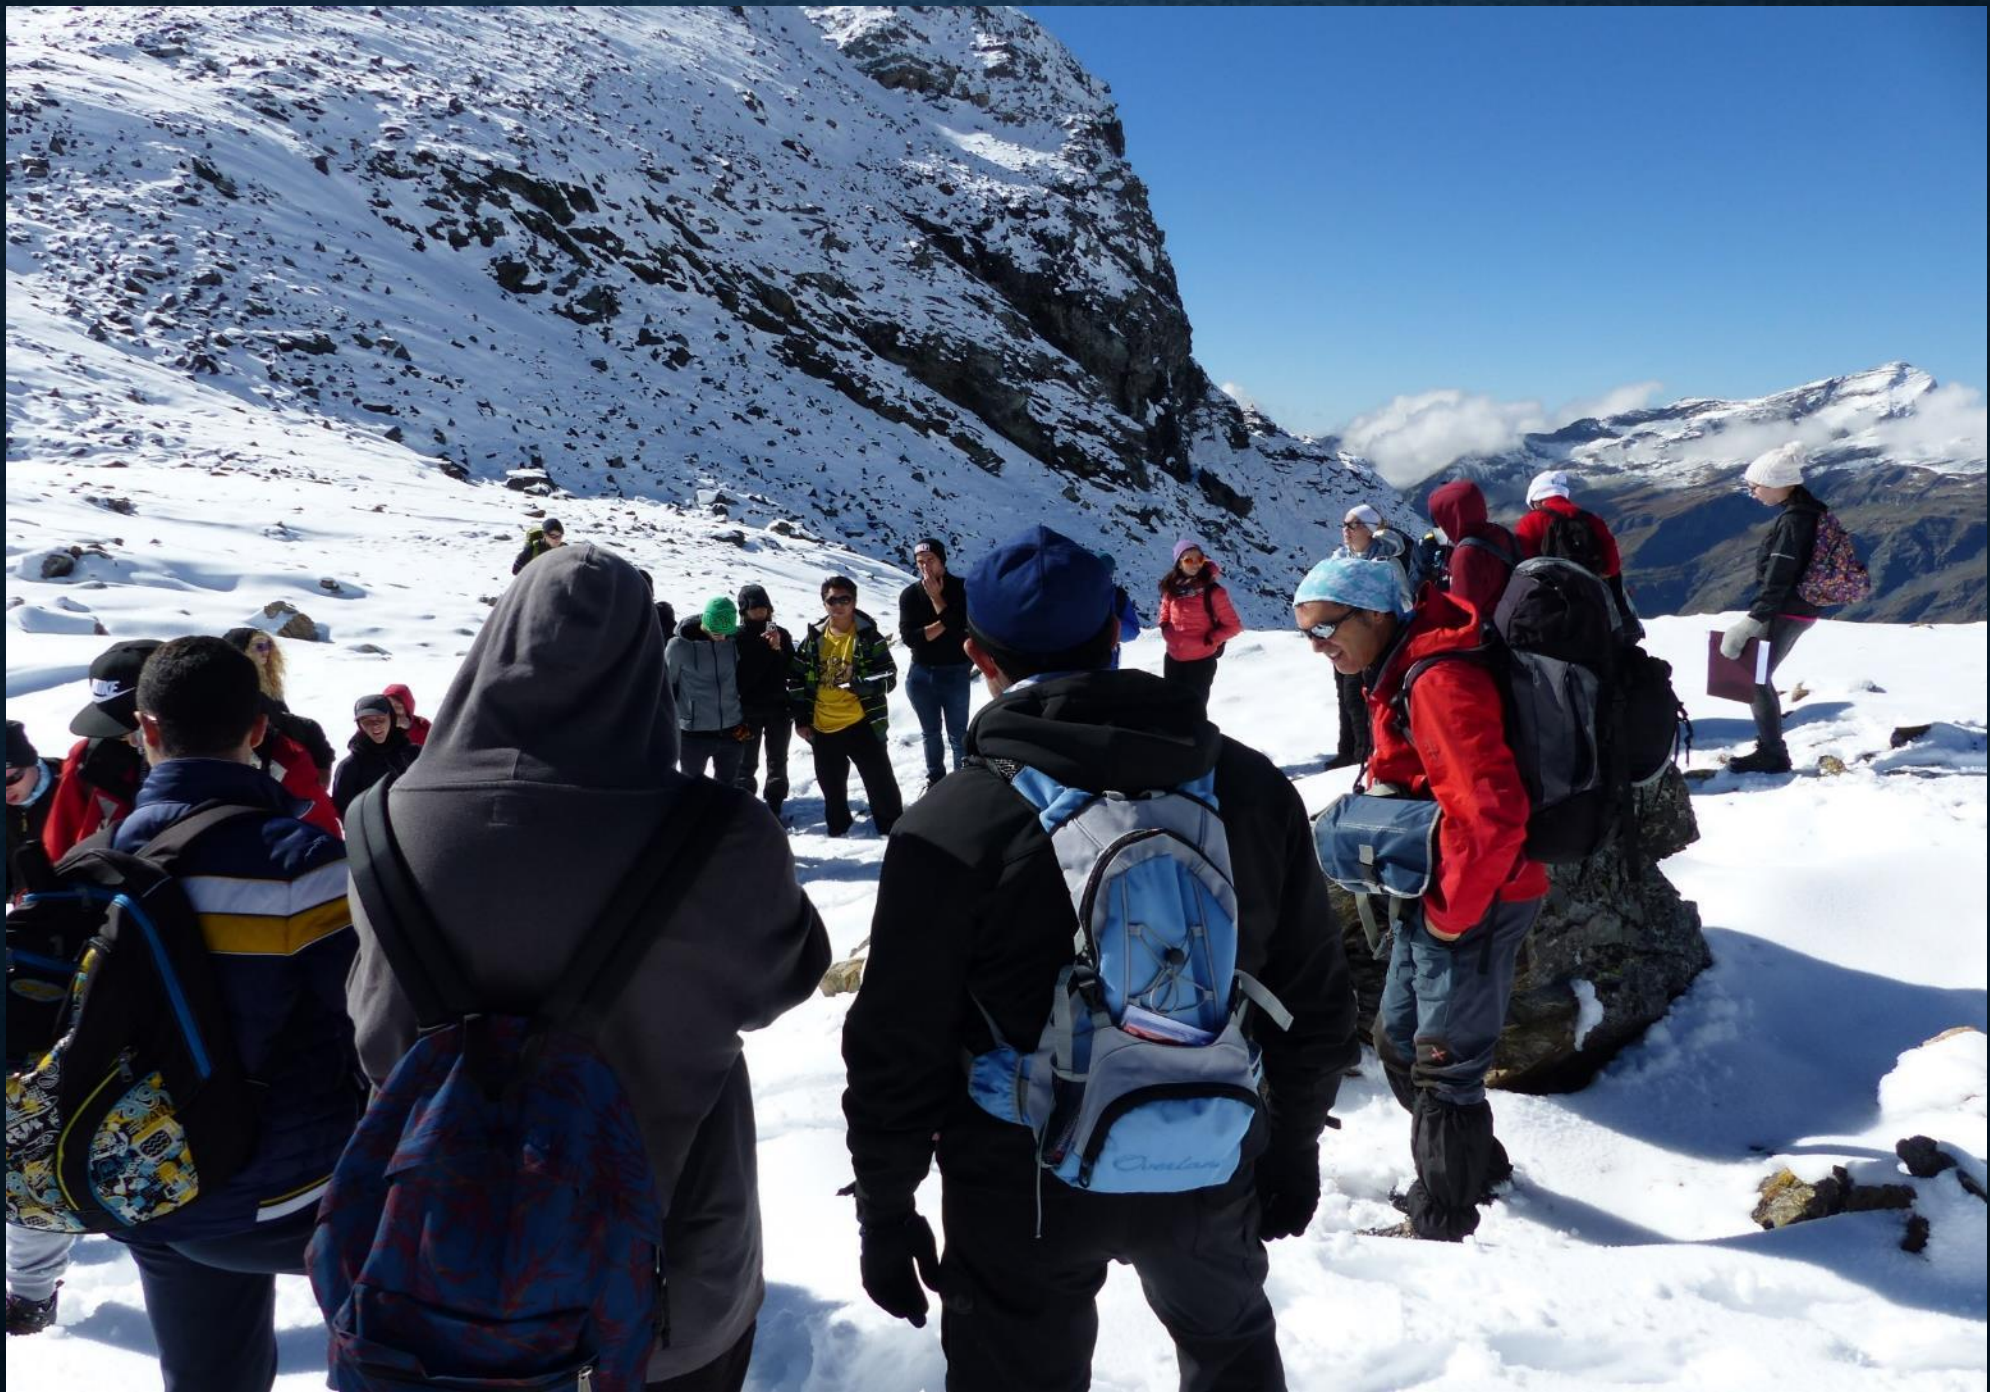



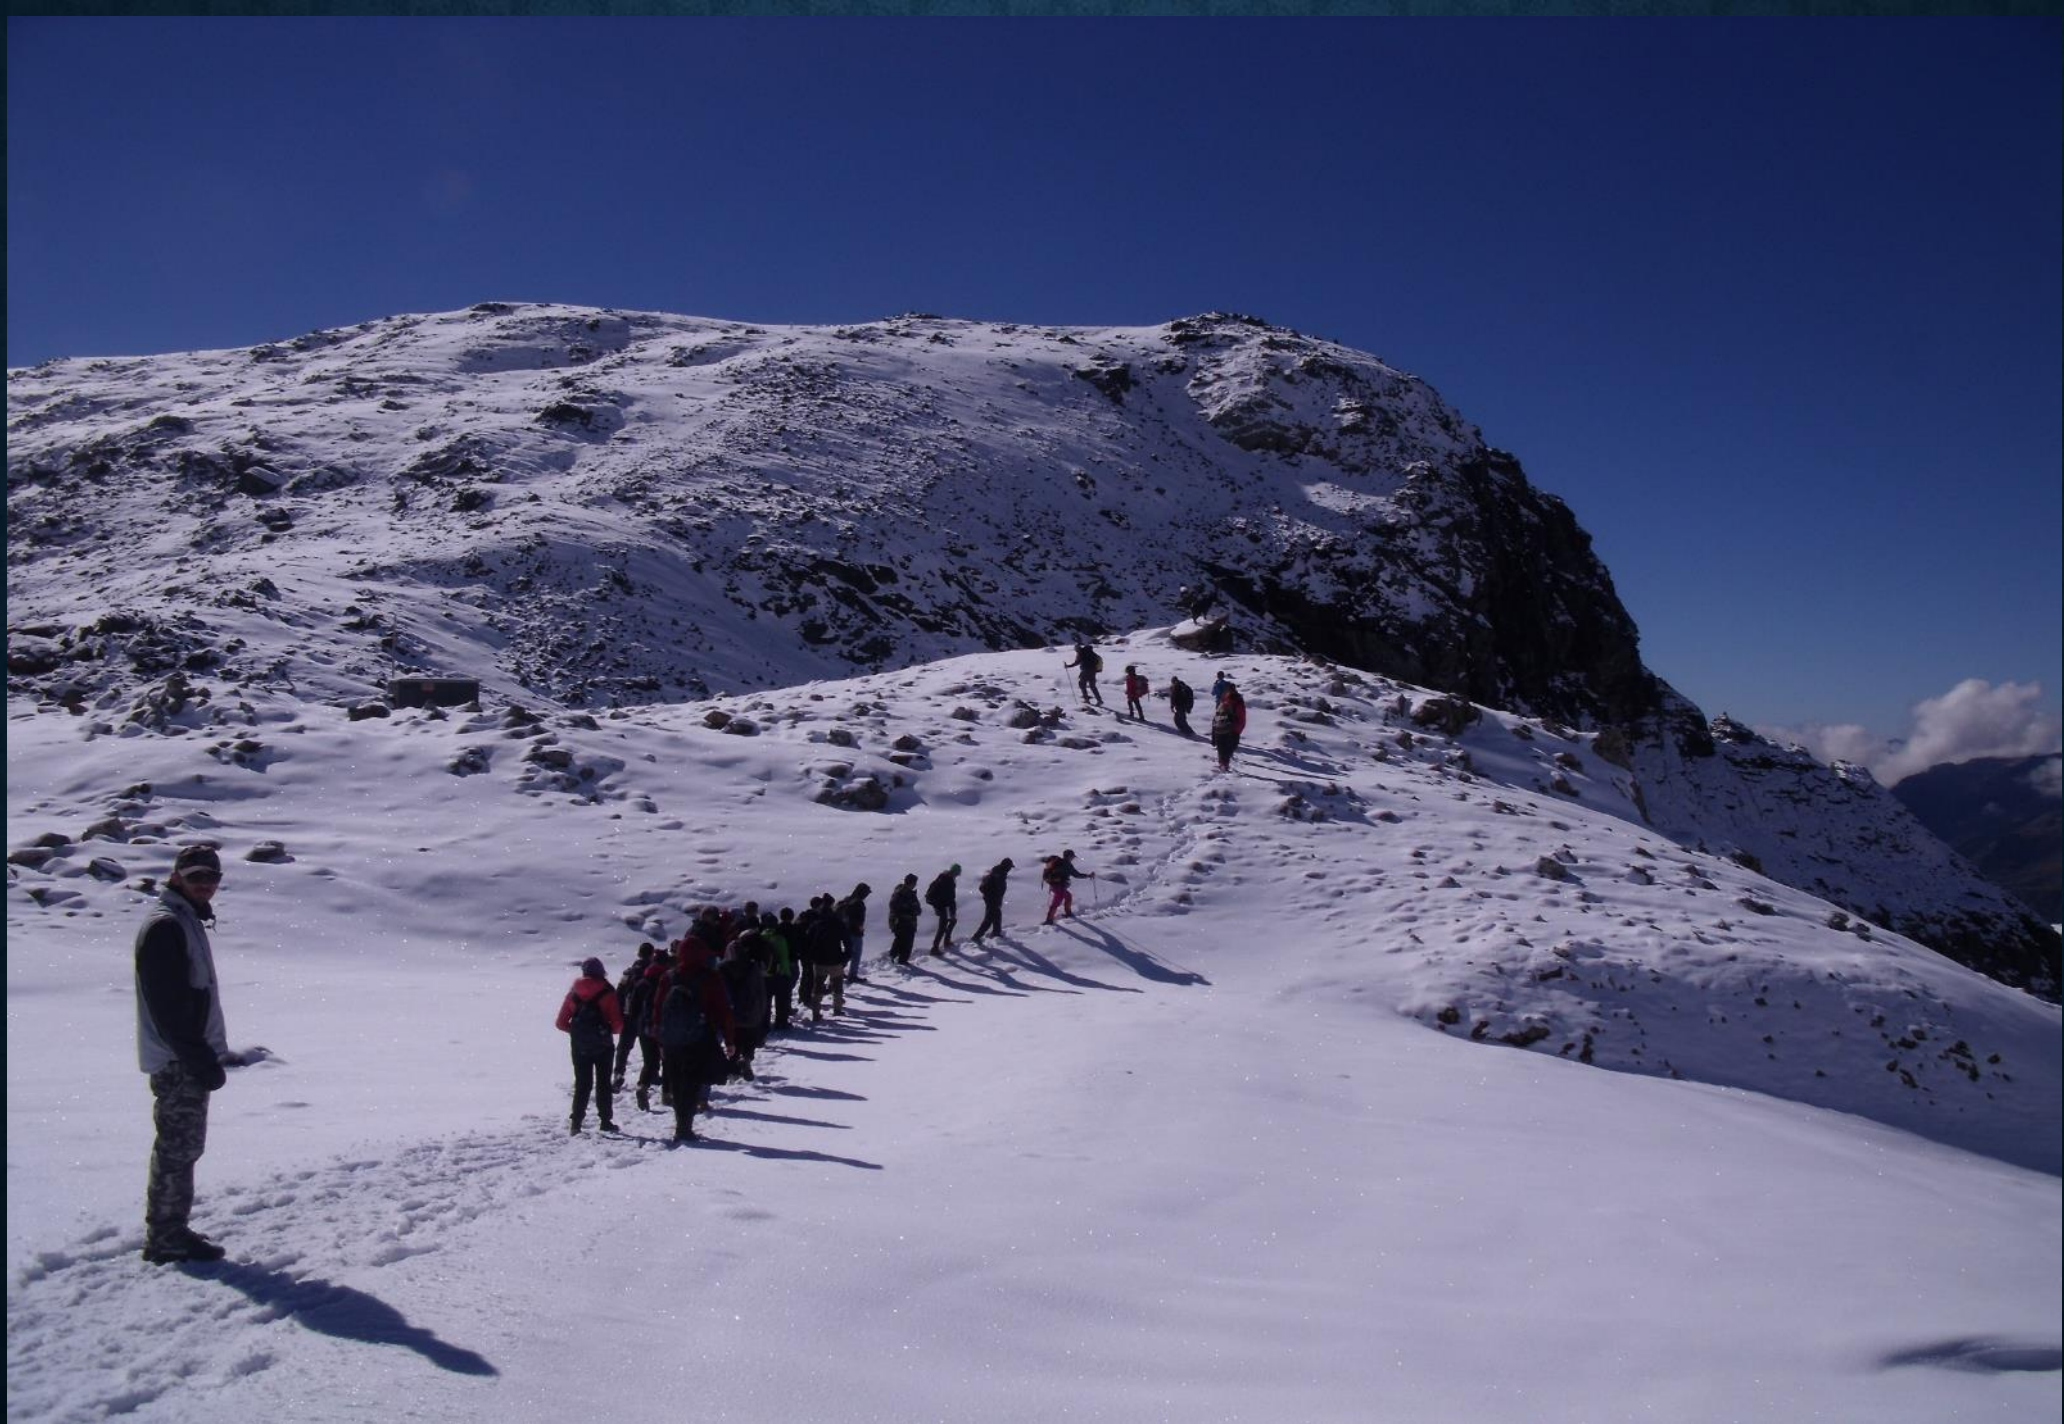



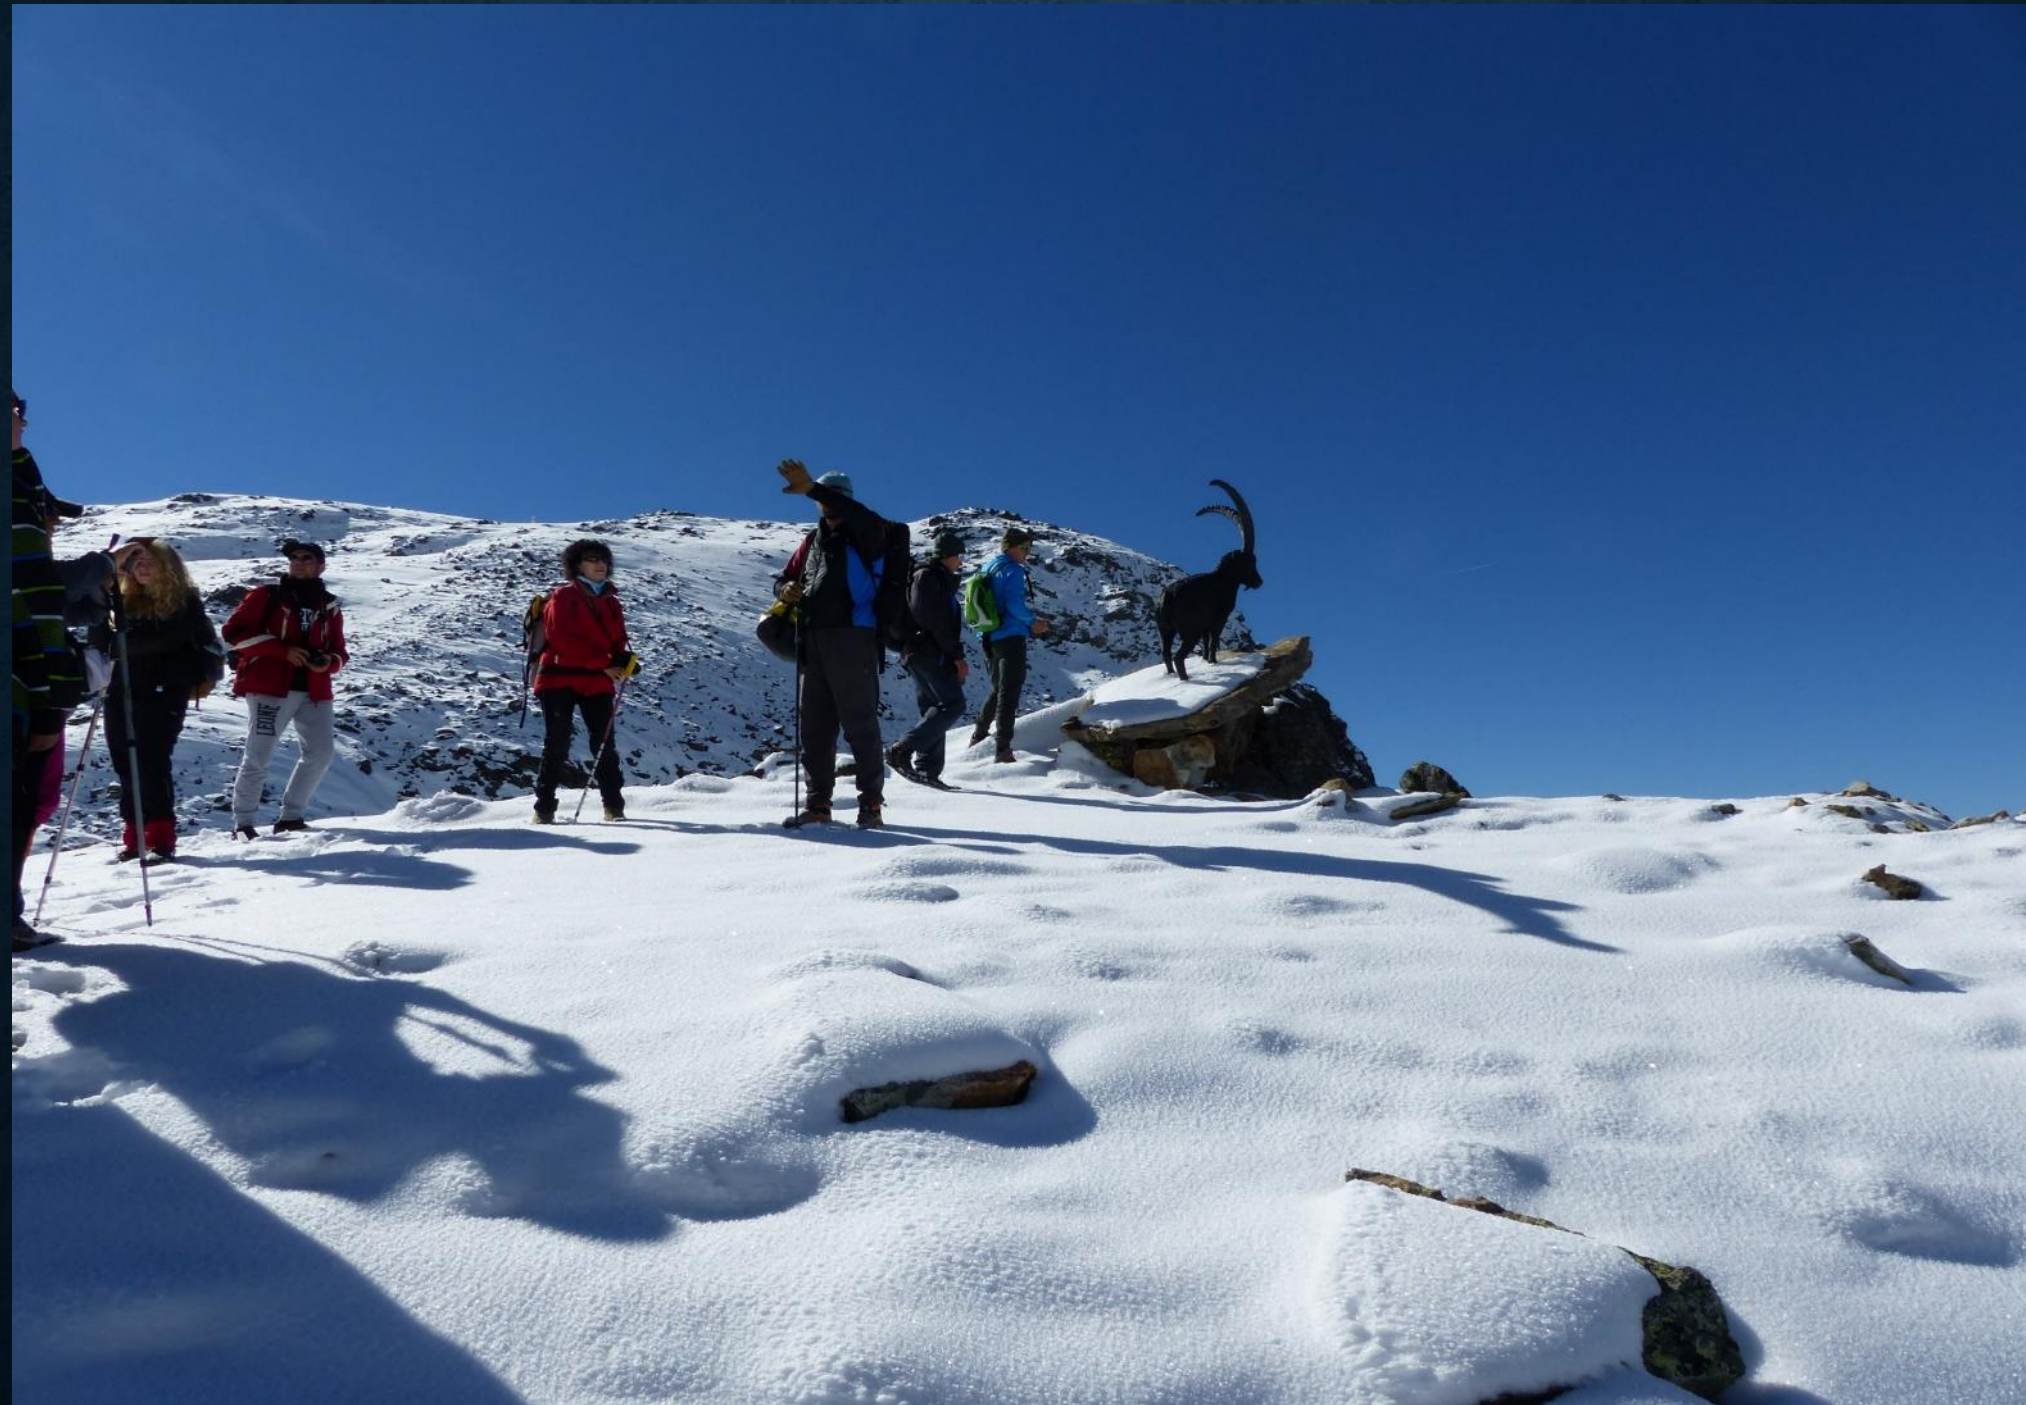



# Activities and field work on Monte Rosa

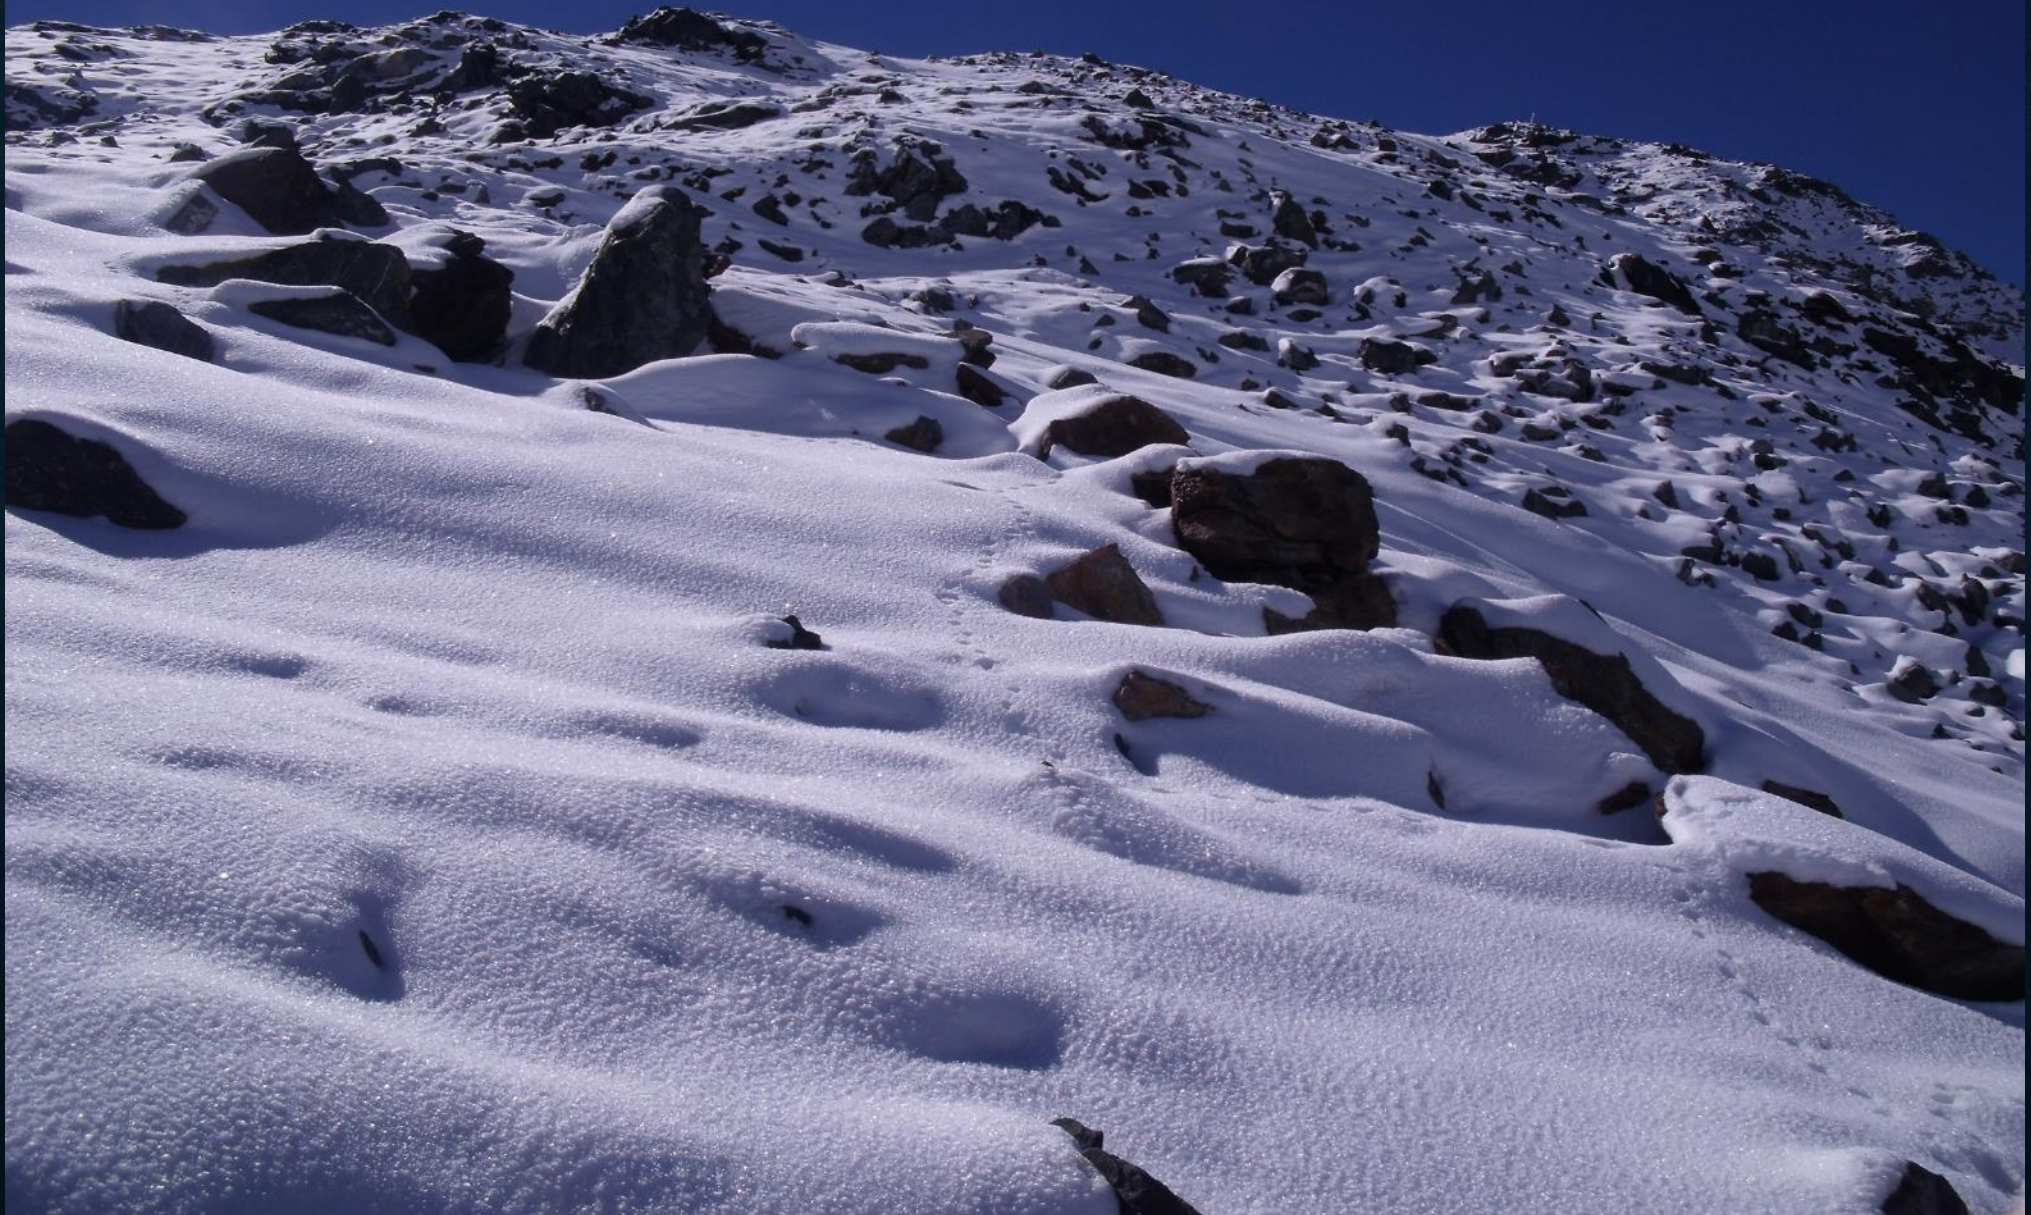



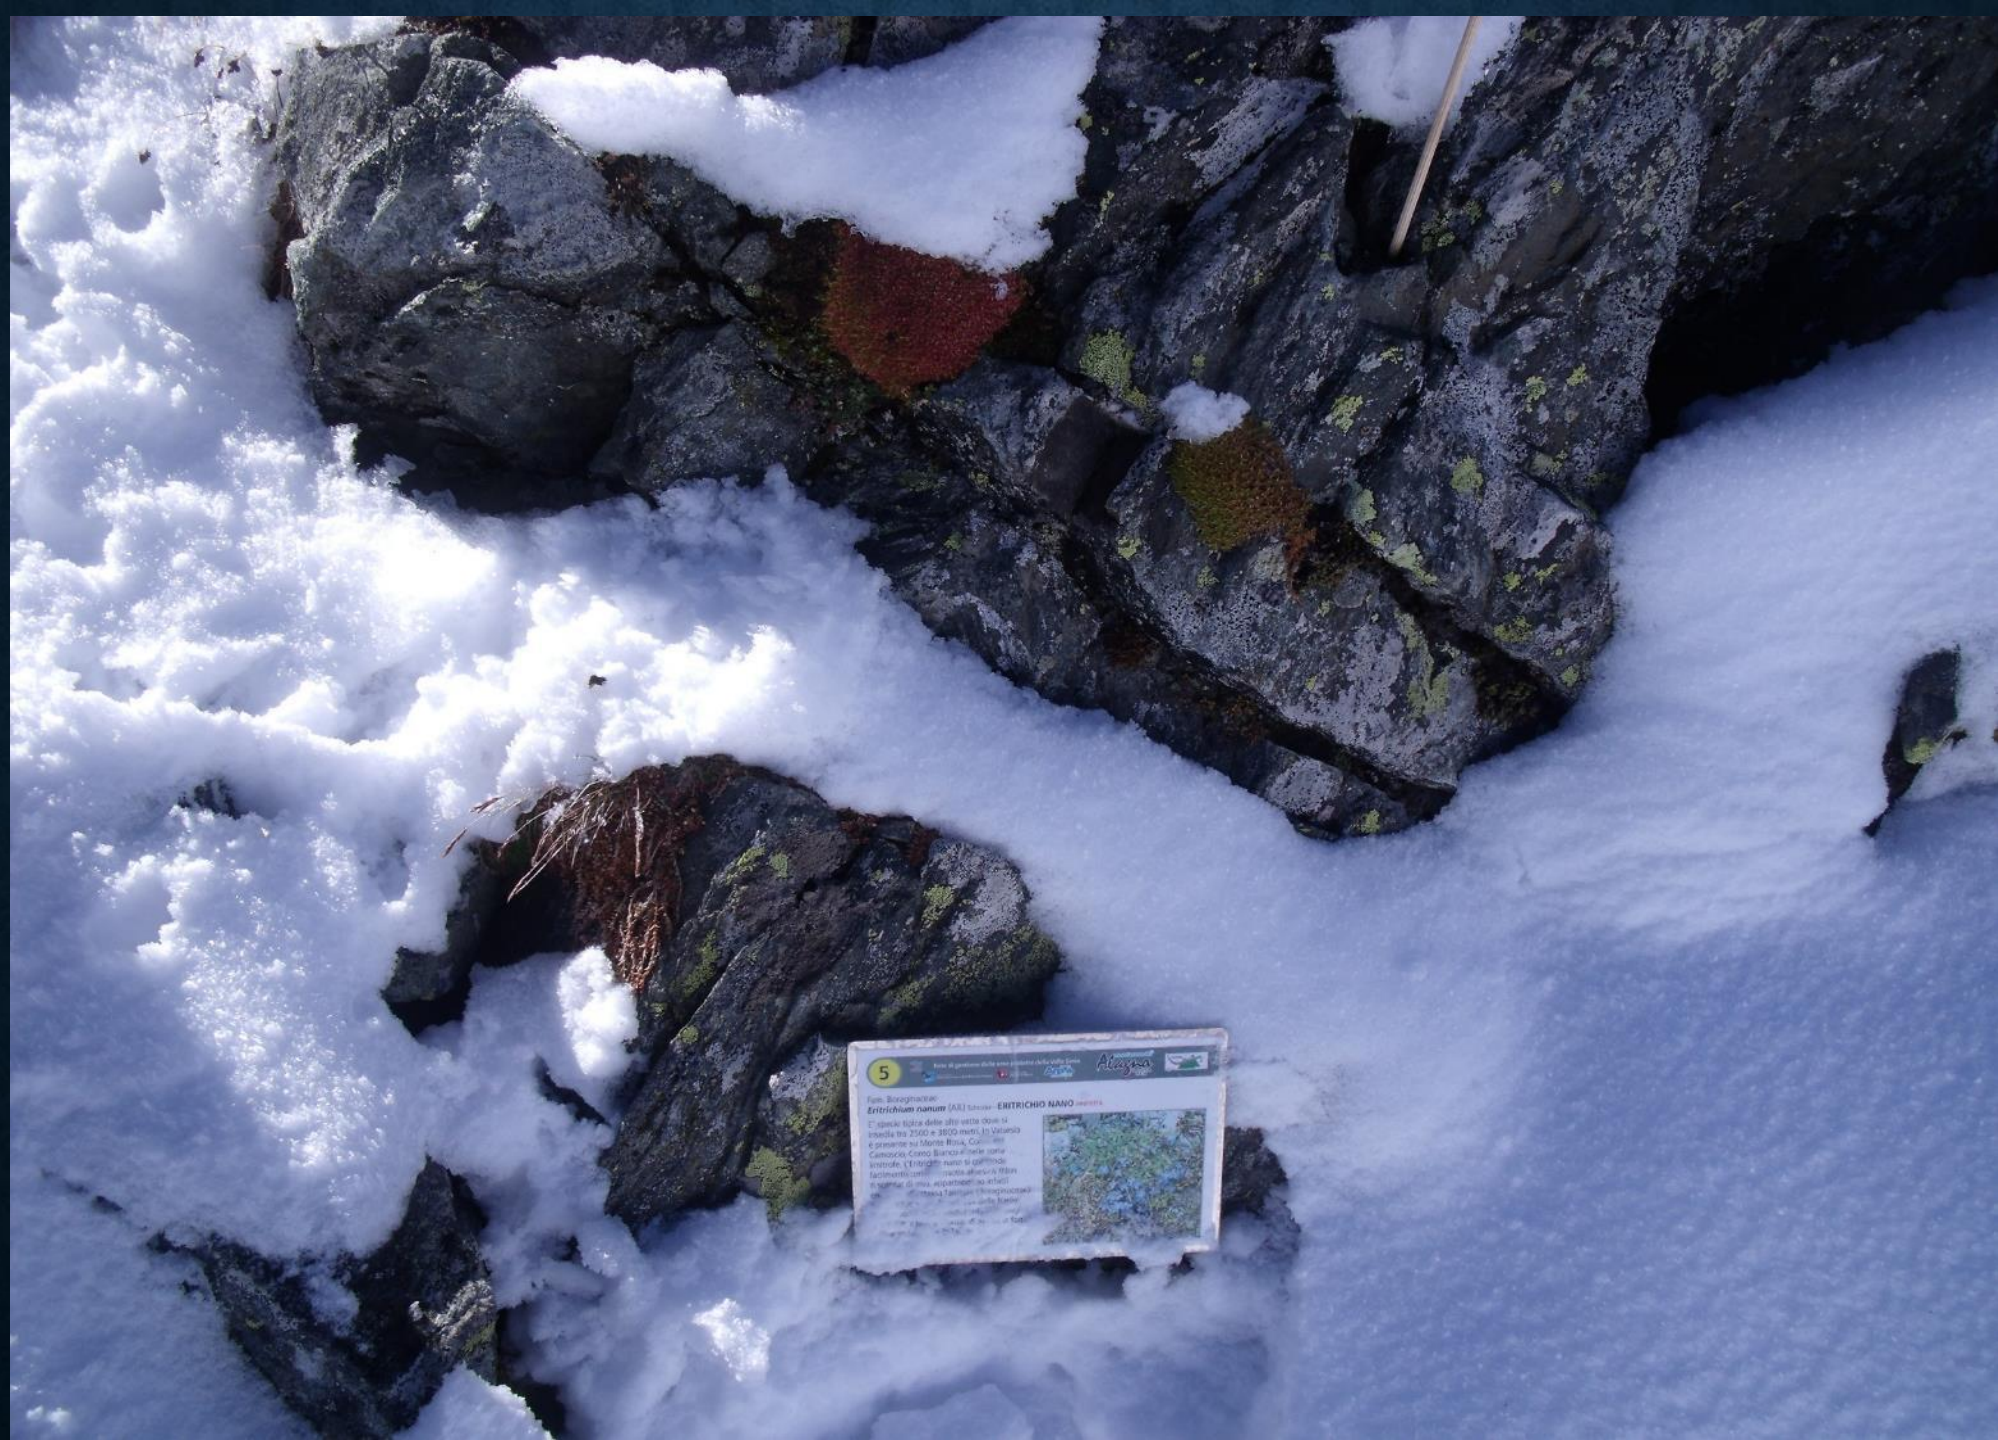



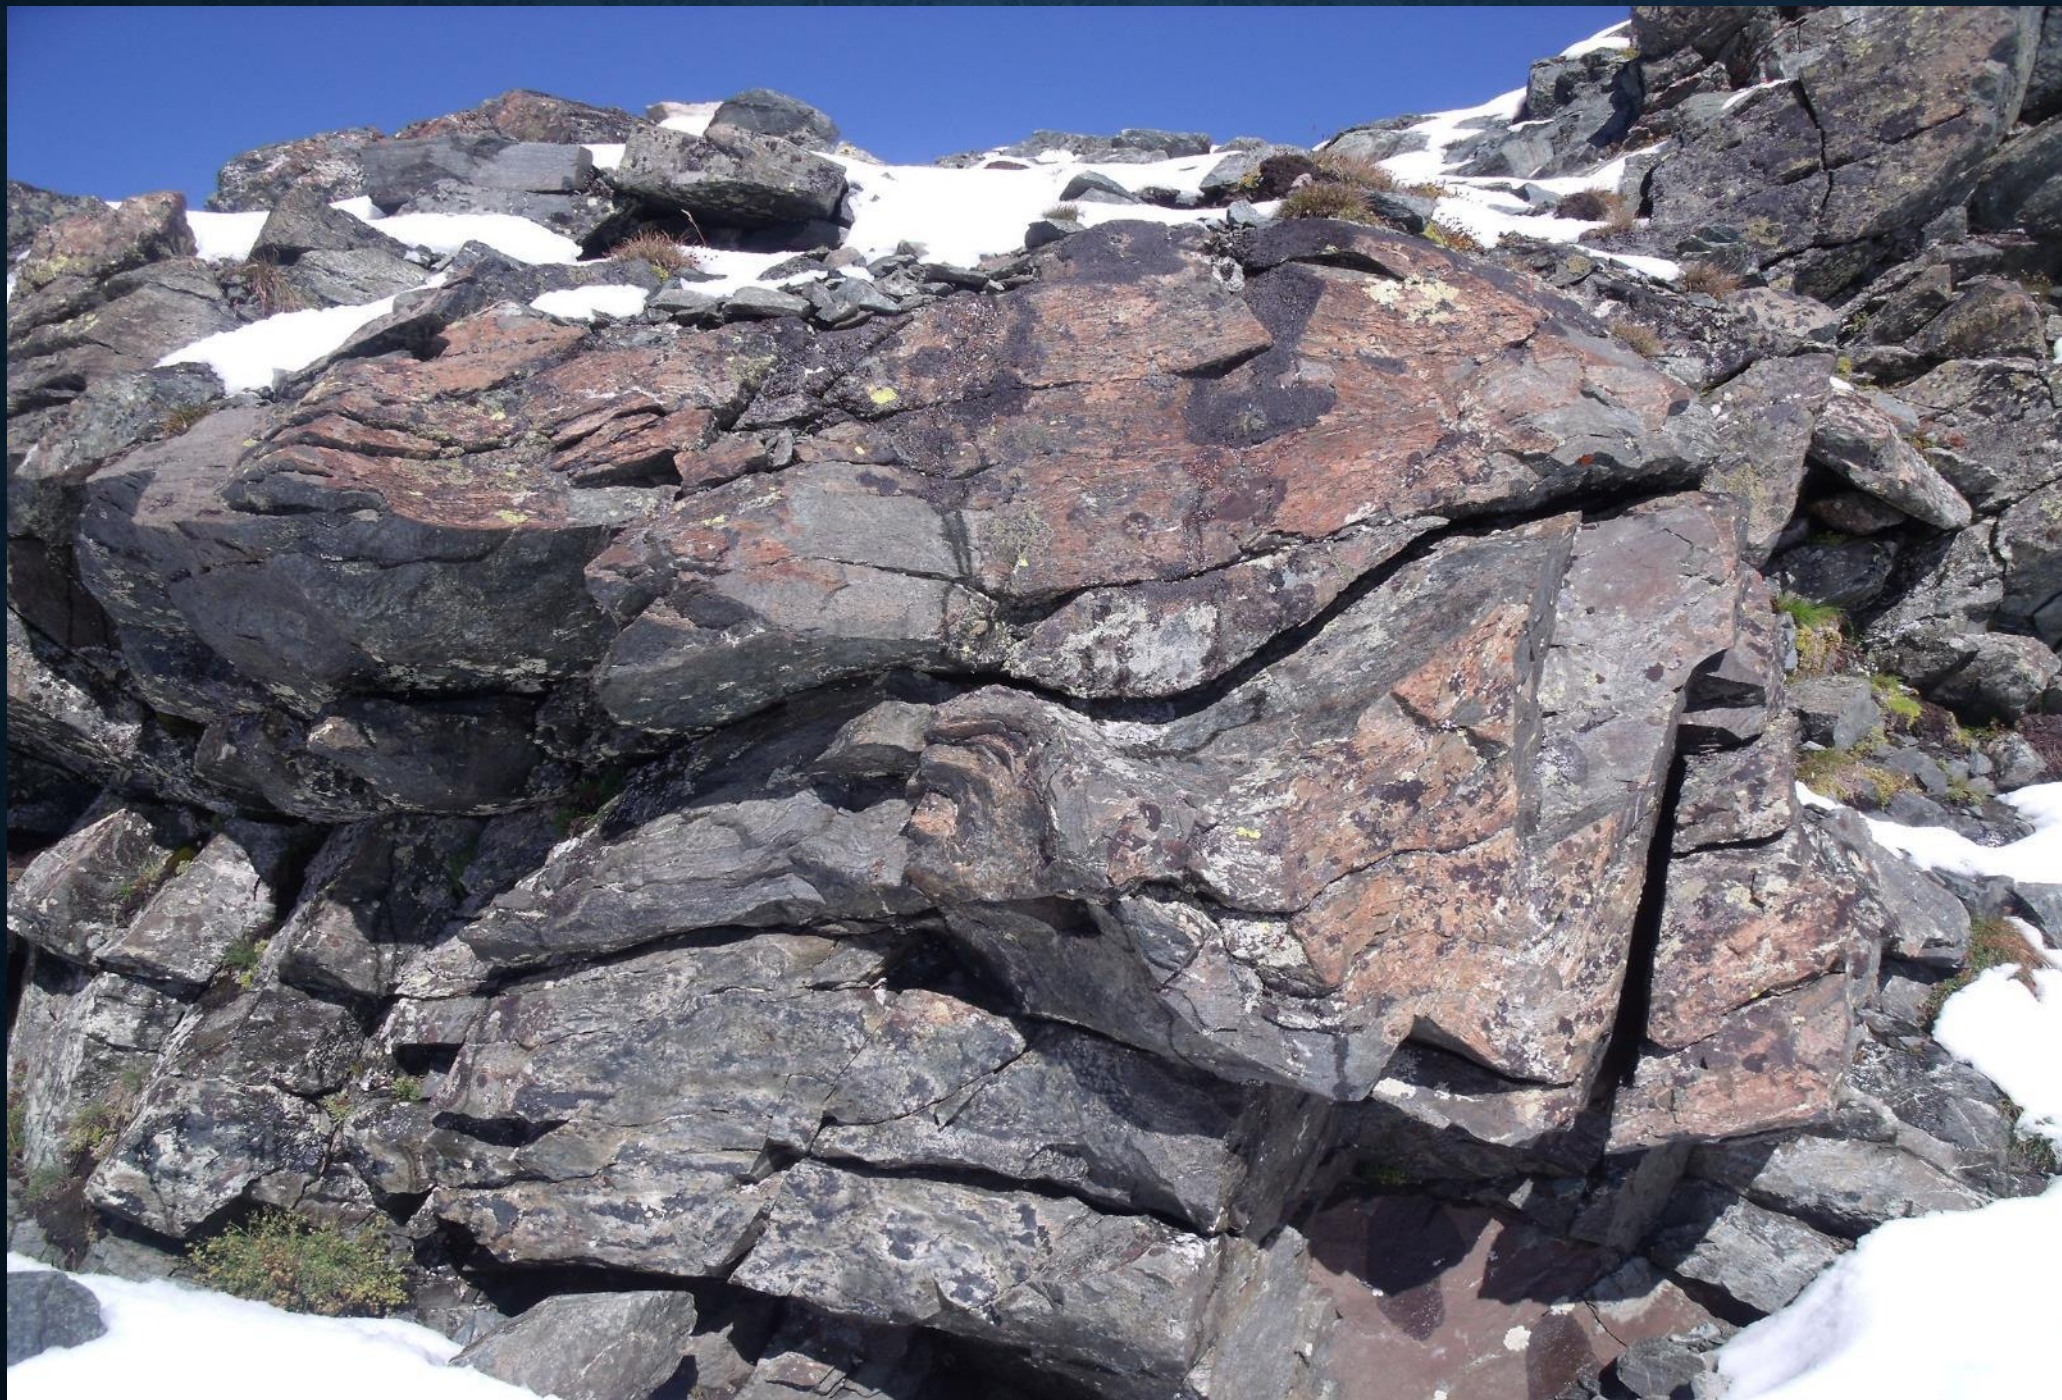



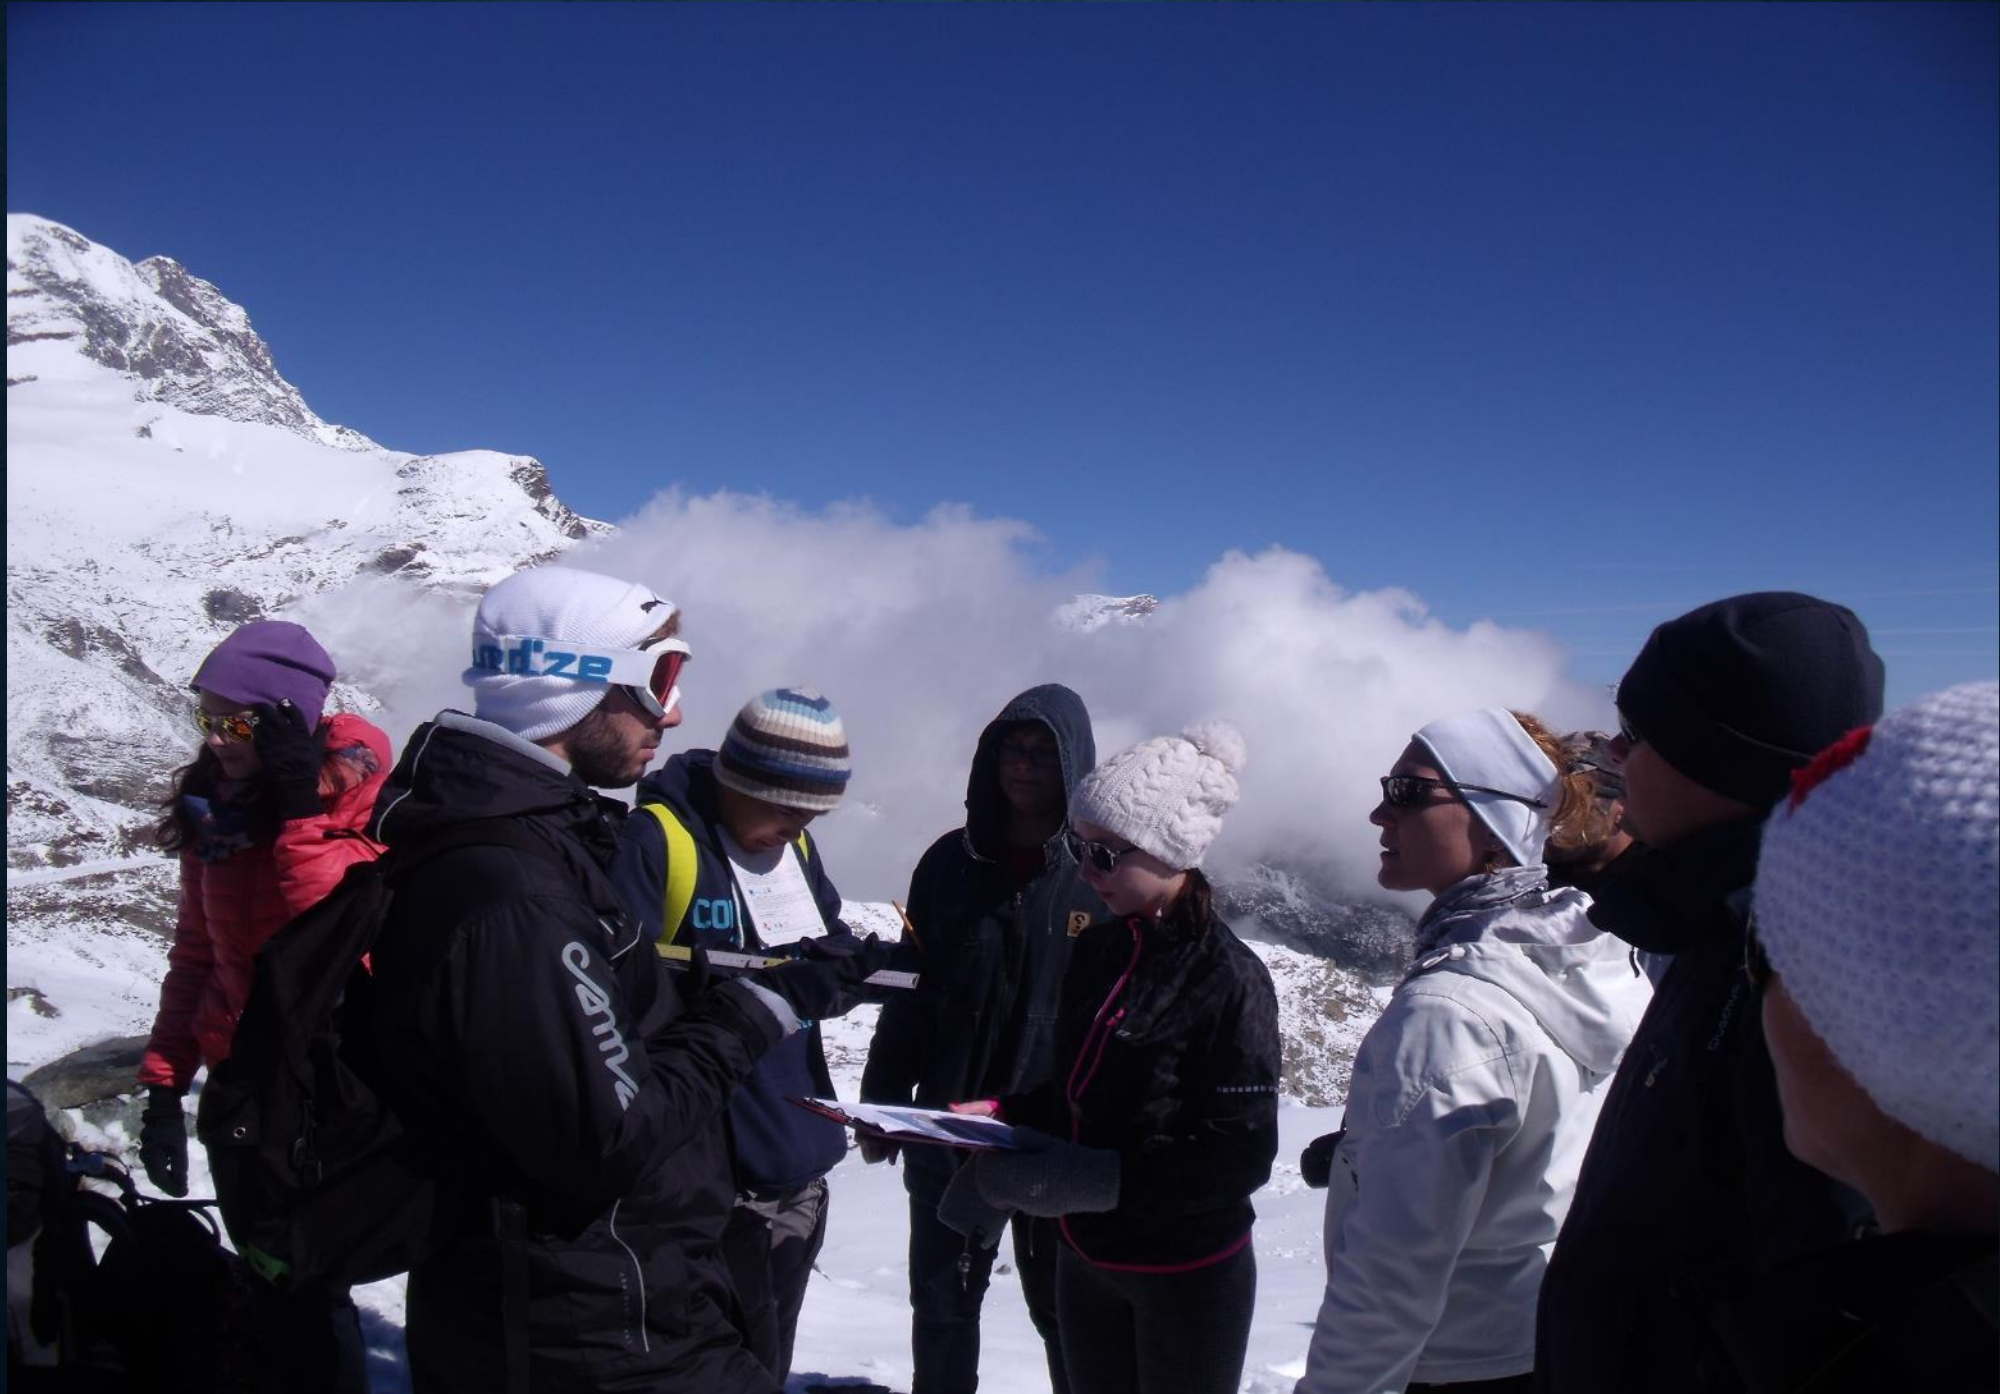



# Weather Station on Monte Rosa

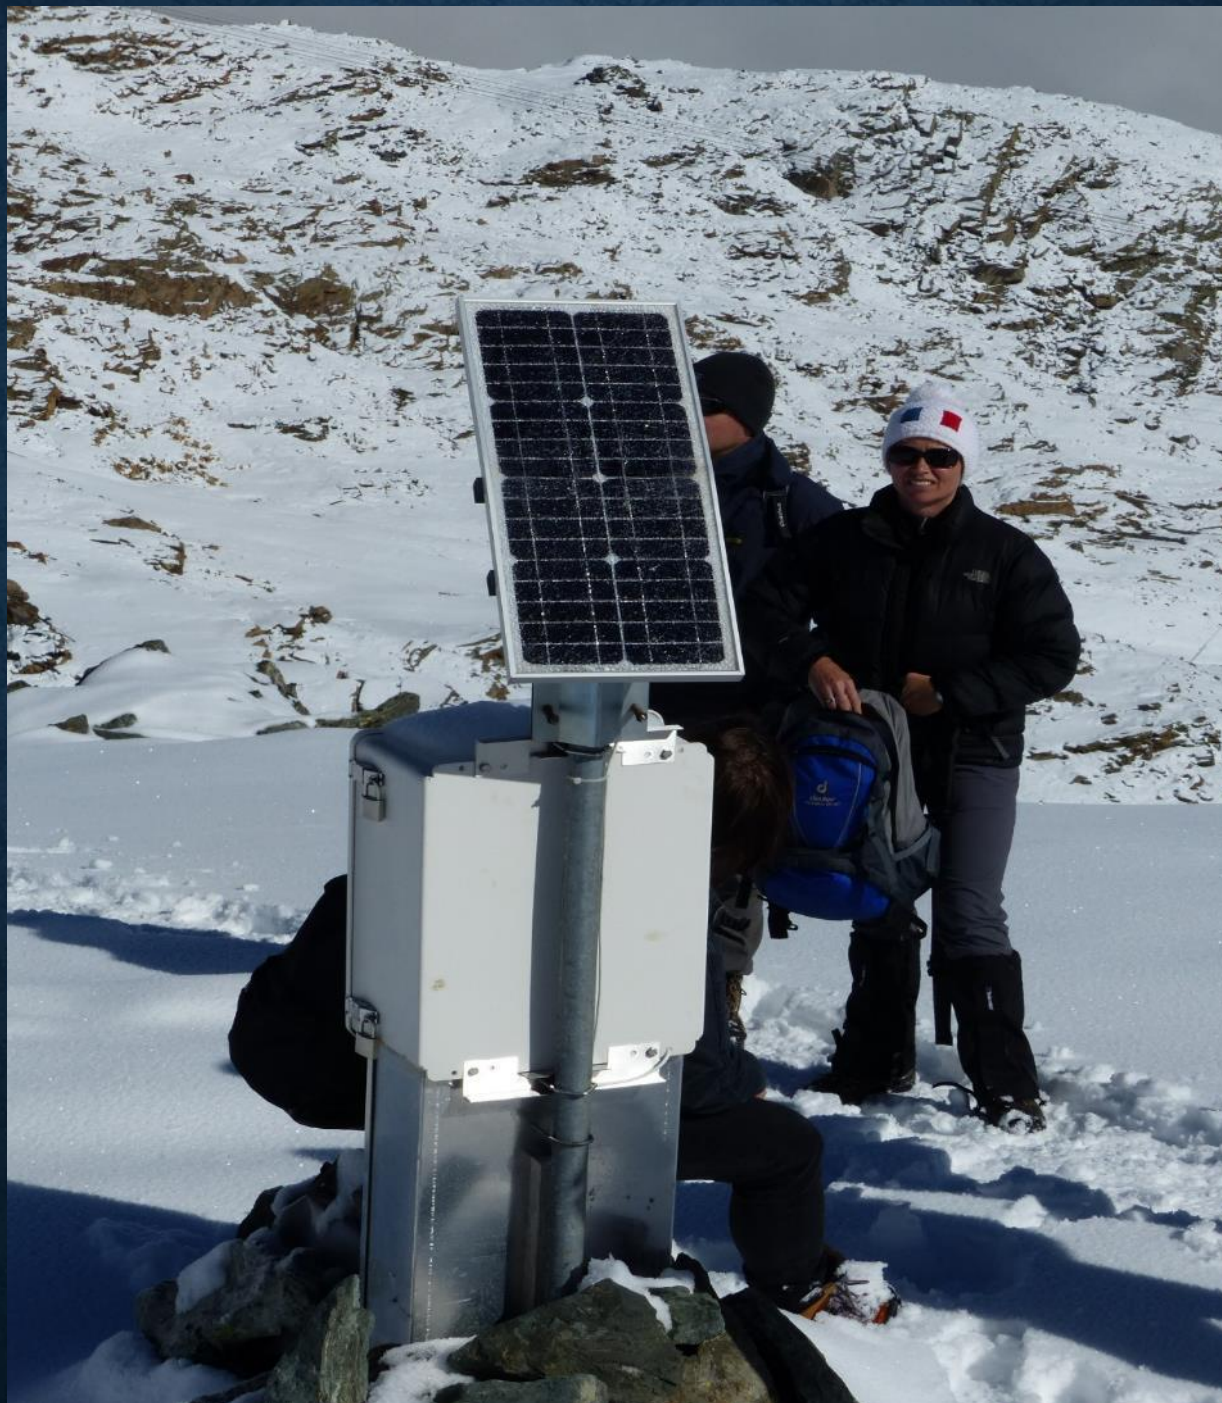



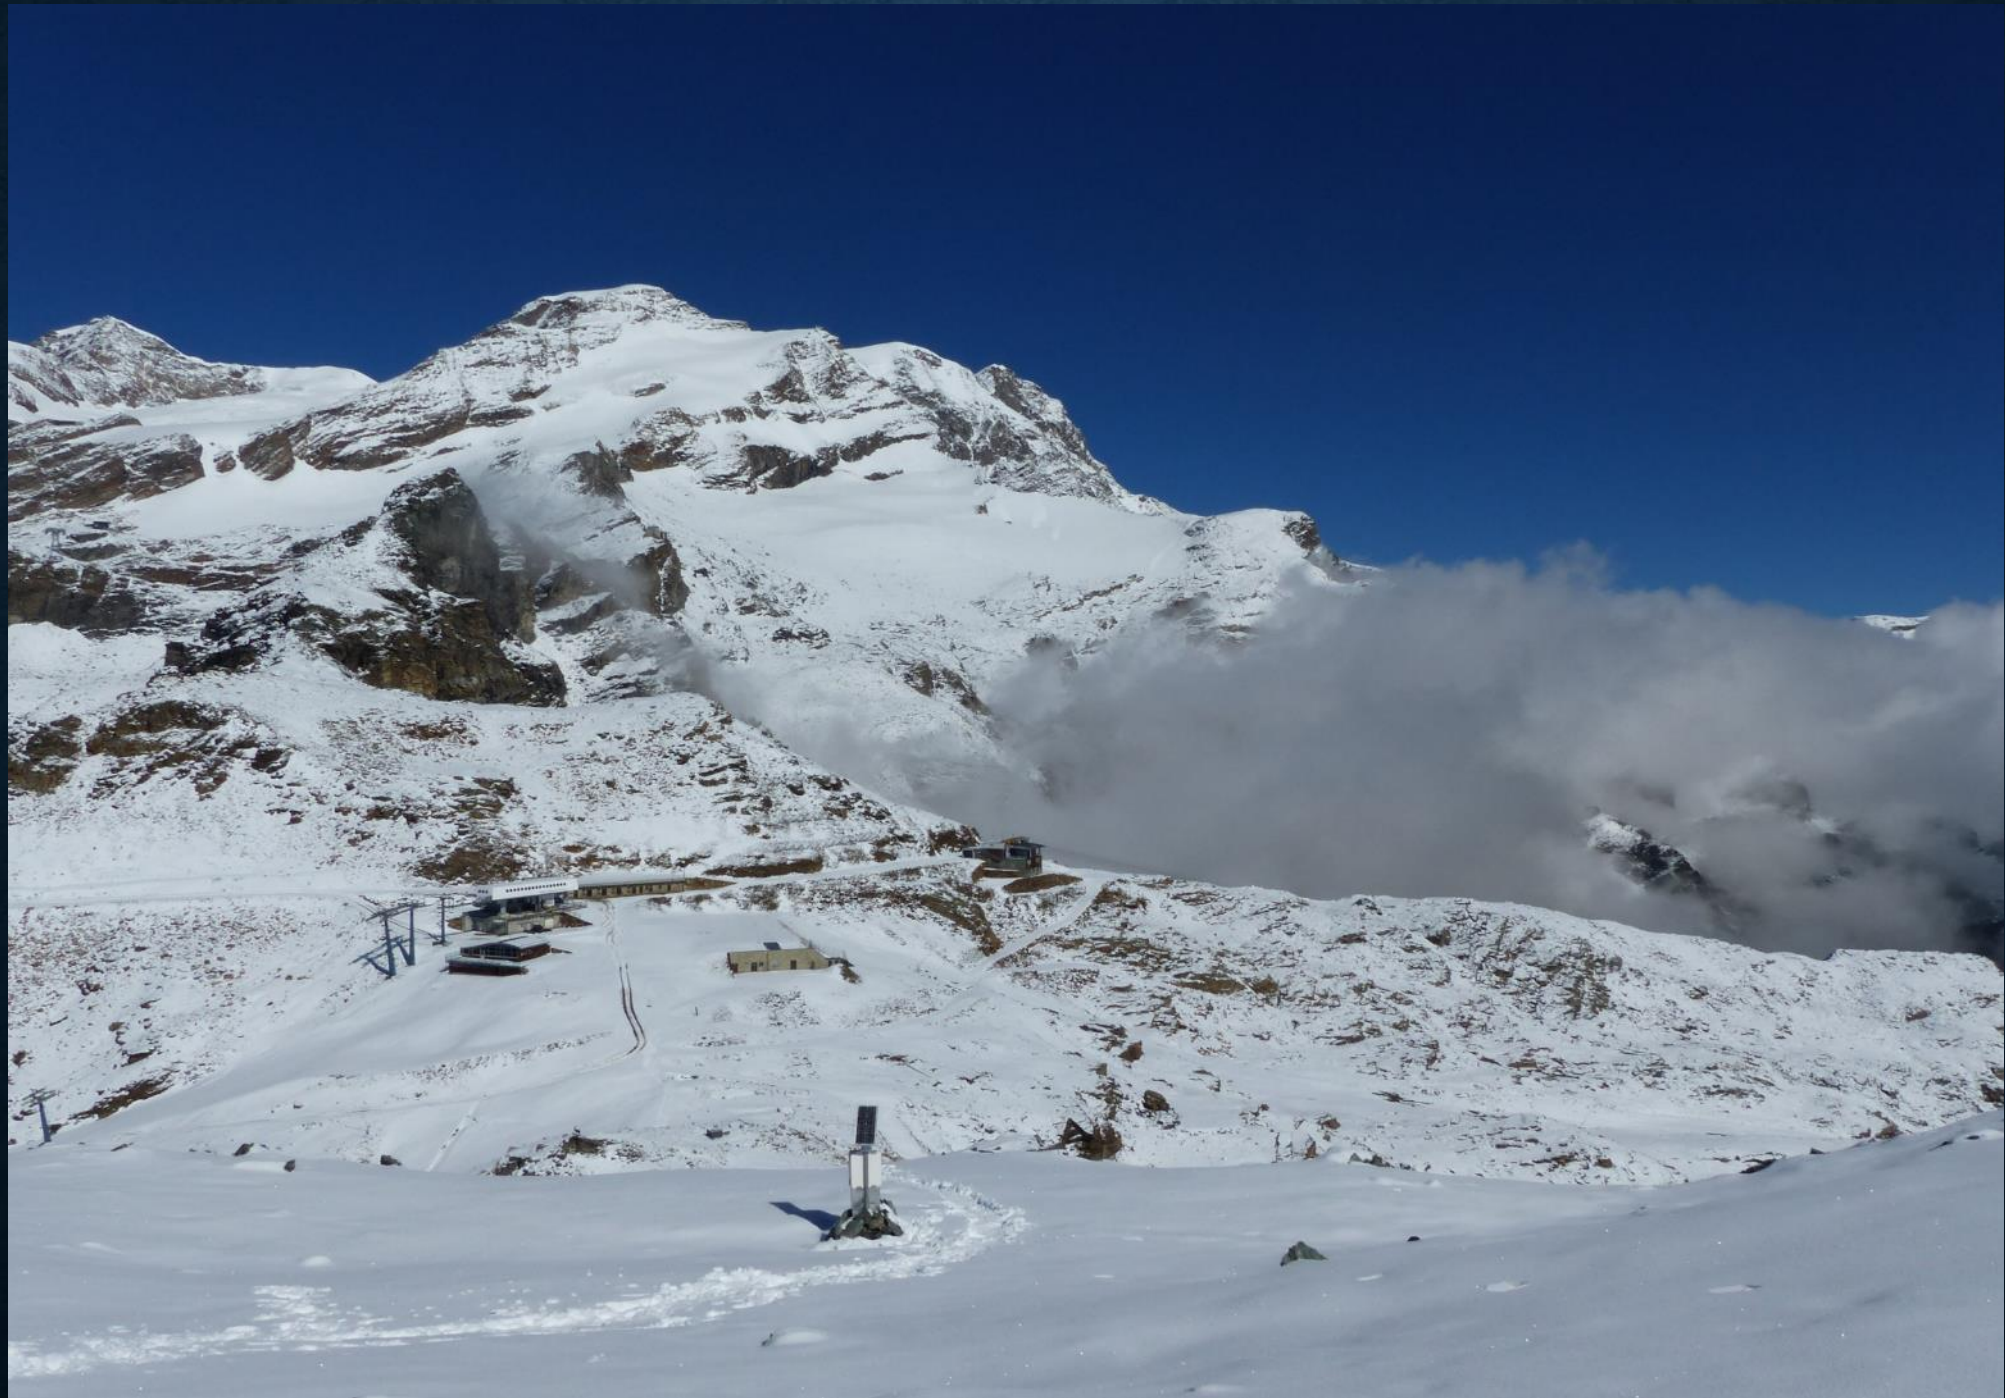



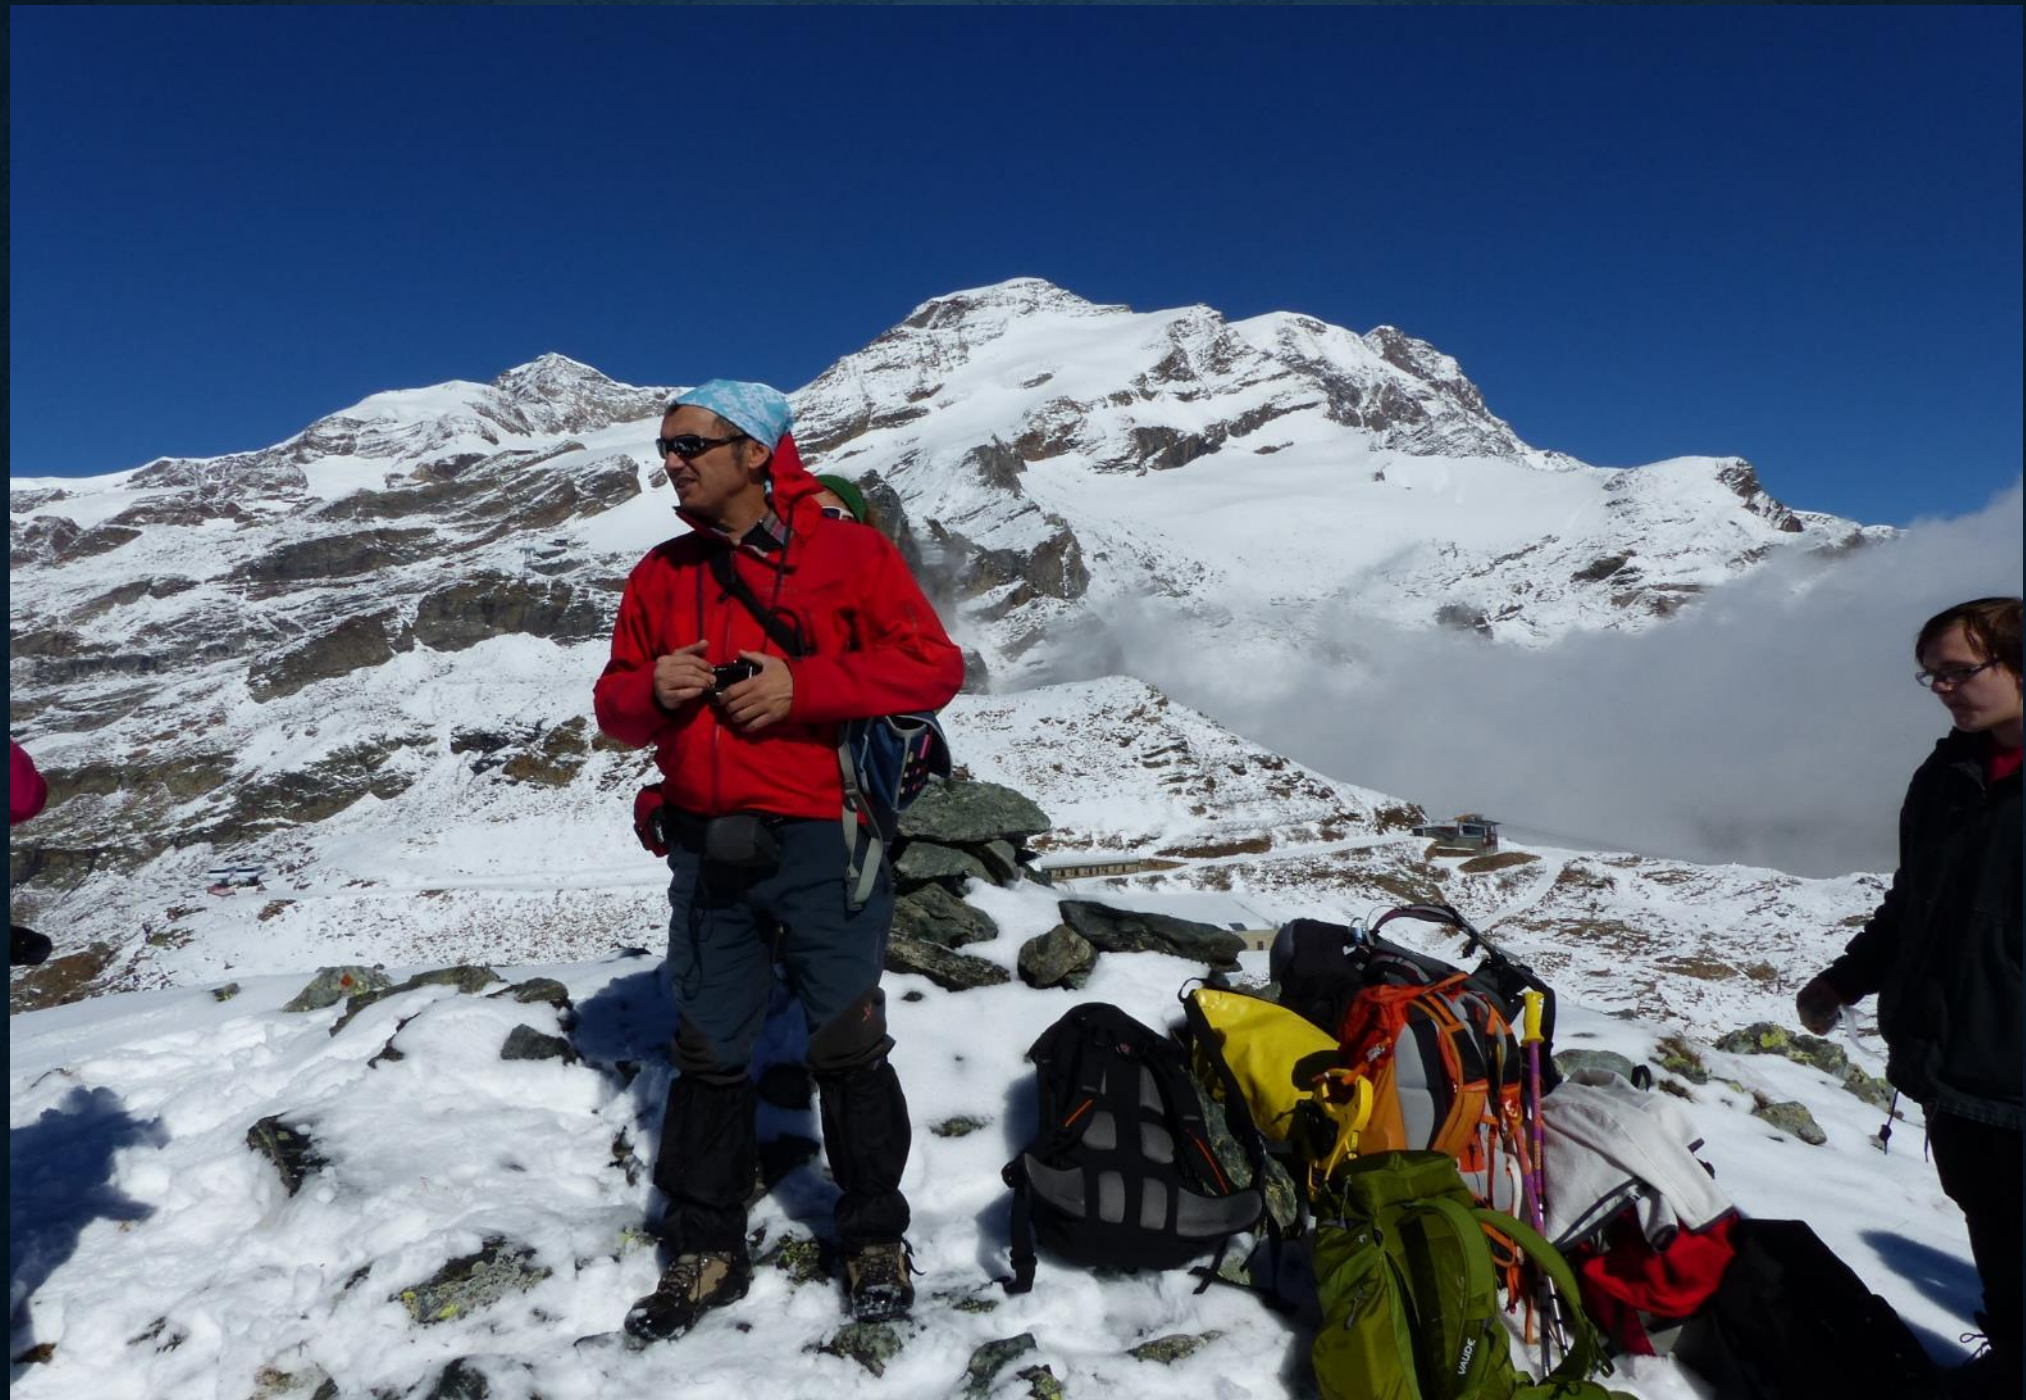



# The highlight of the project week

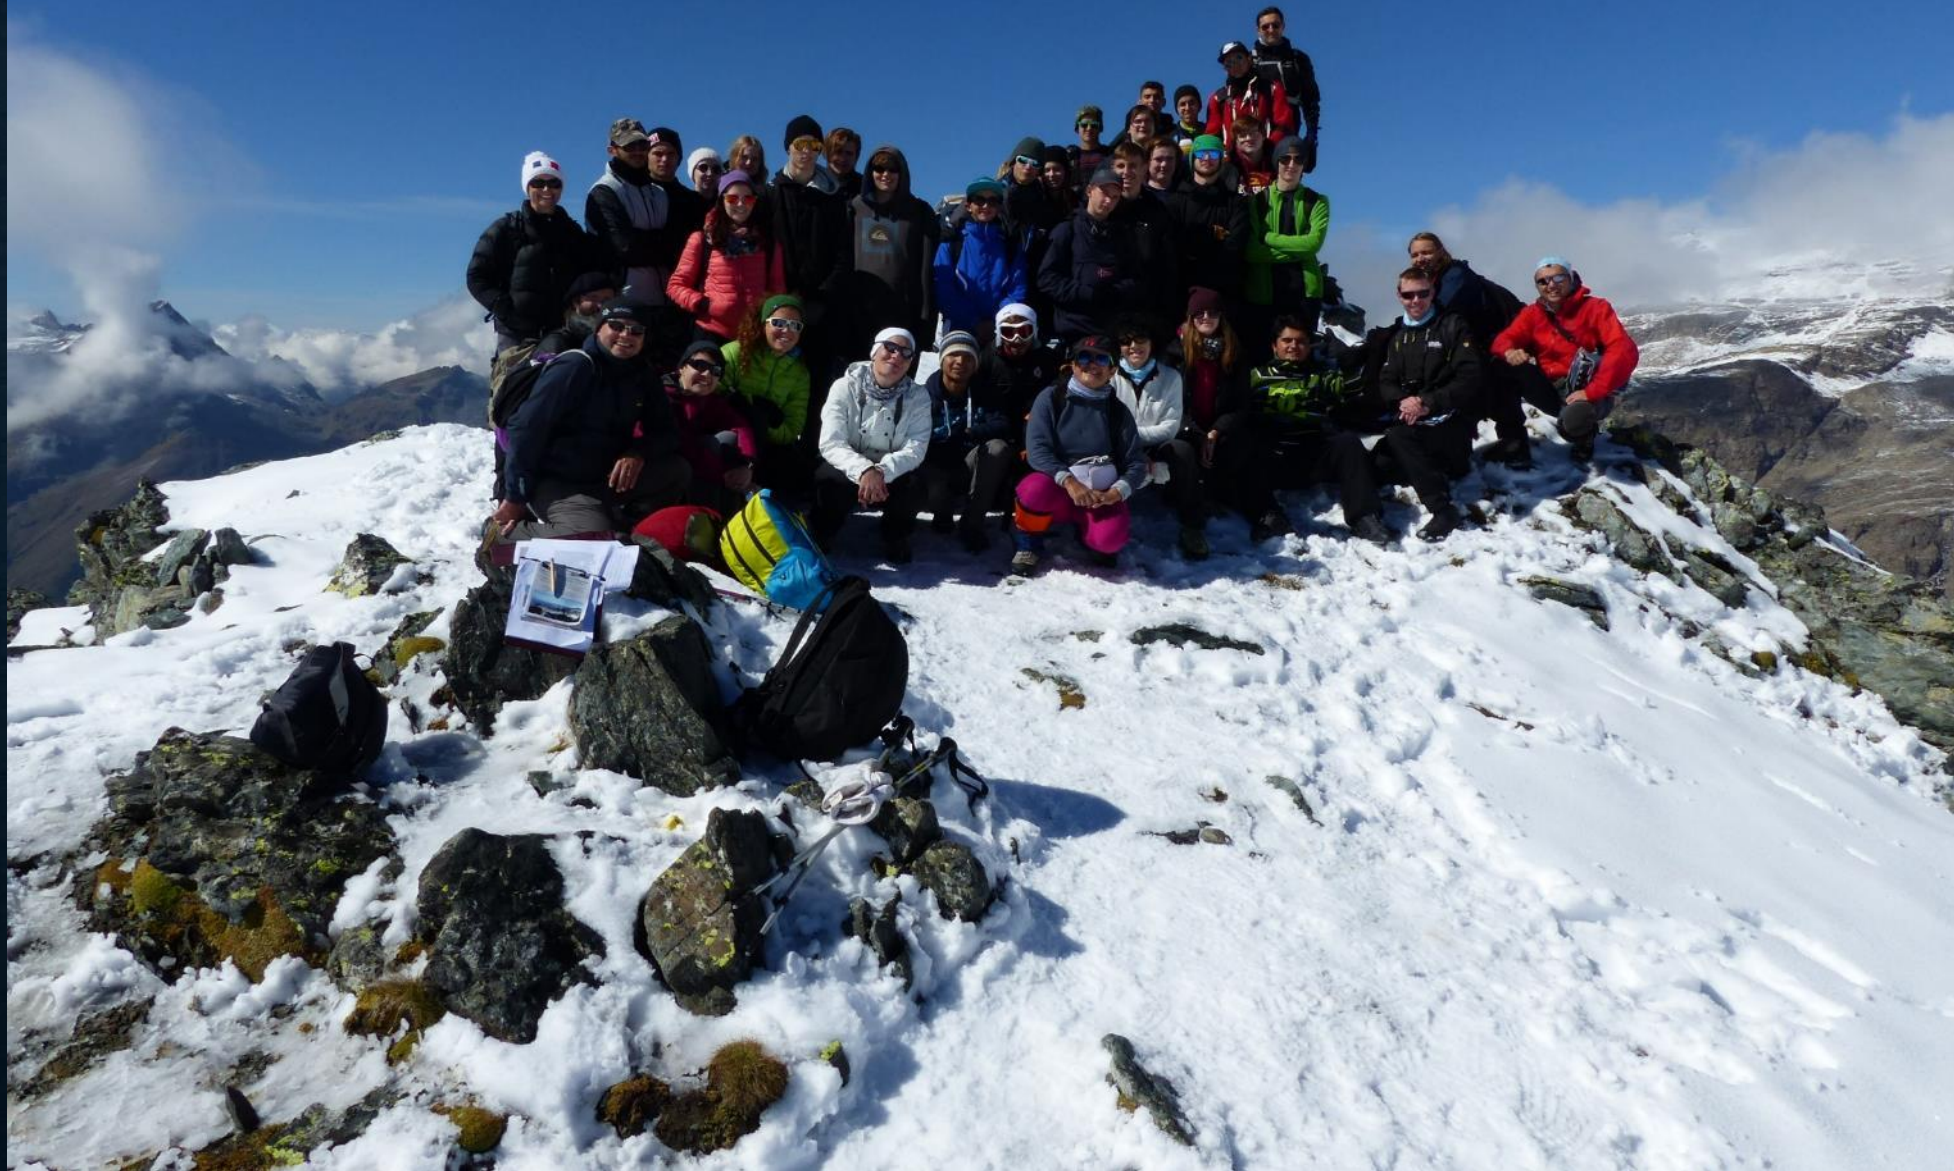



# The Mosso Institute

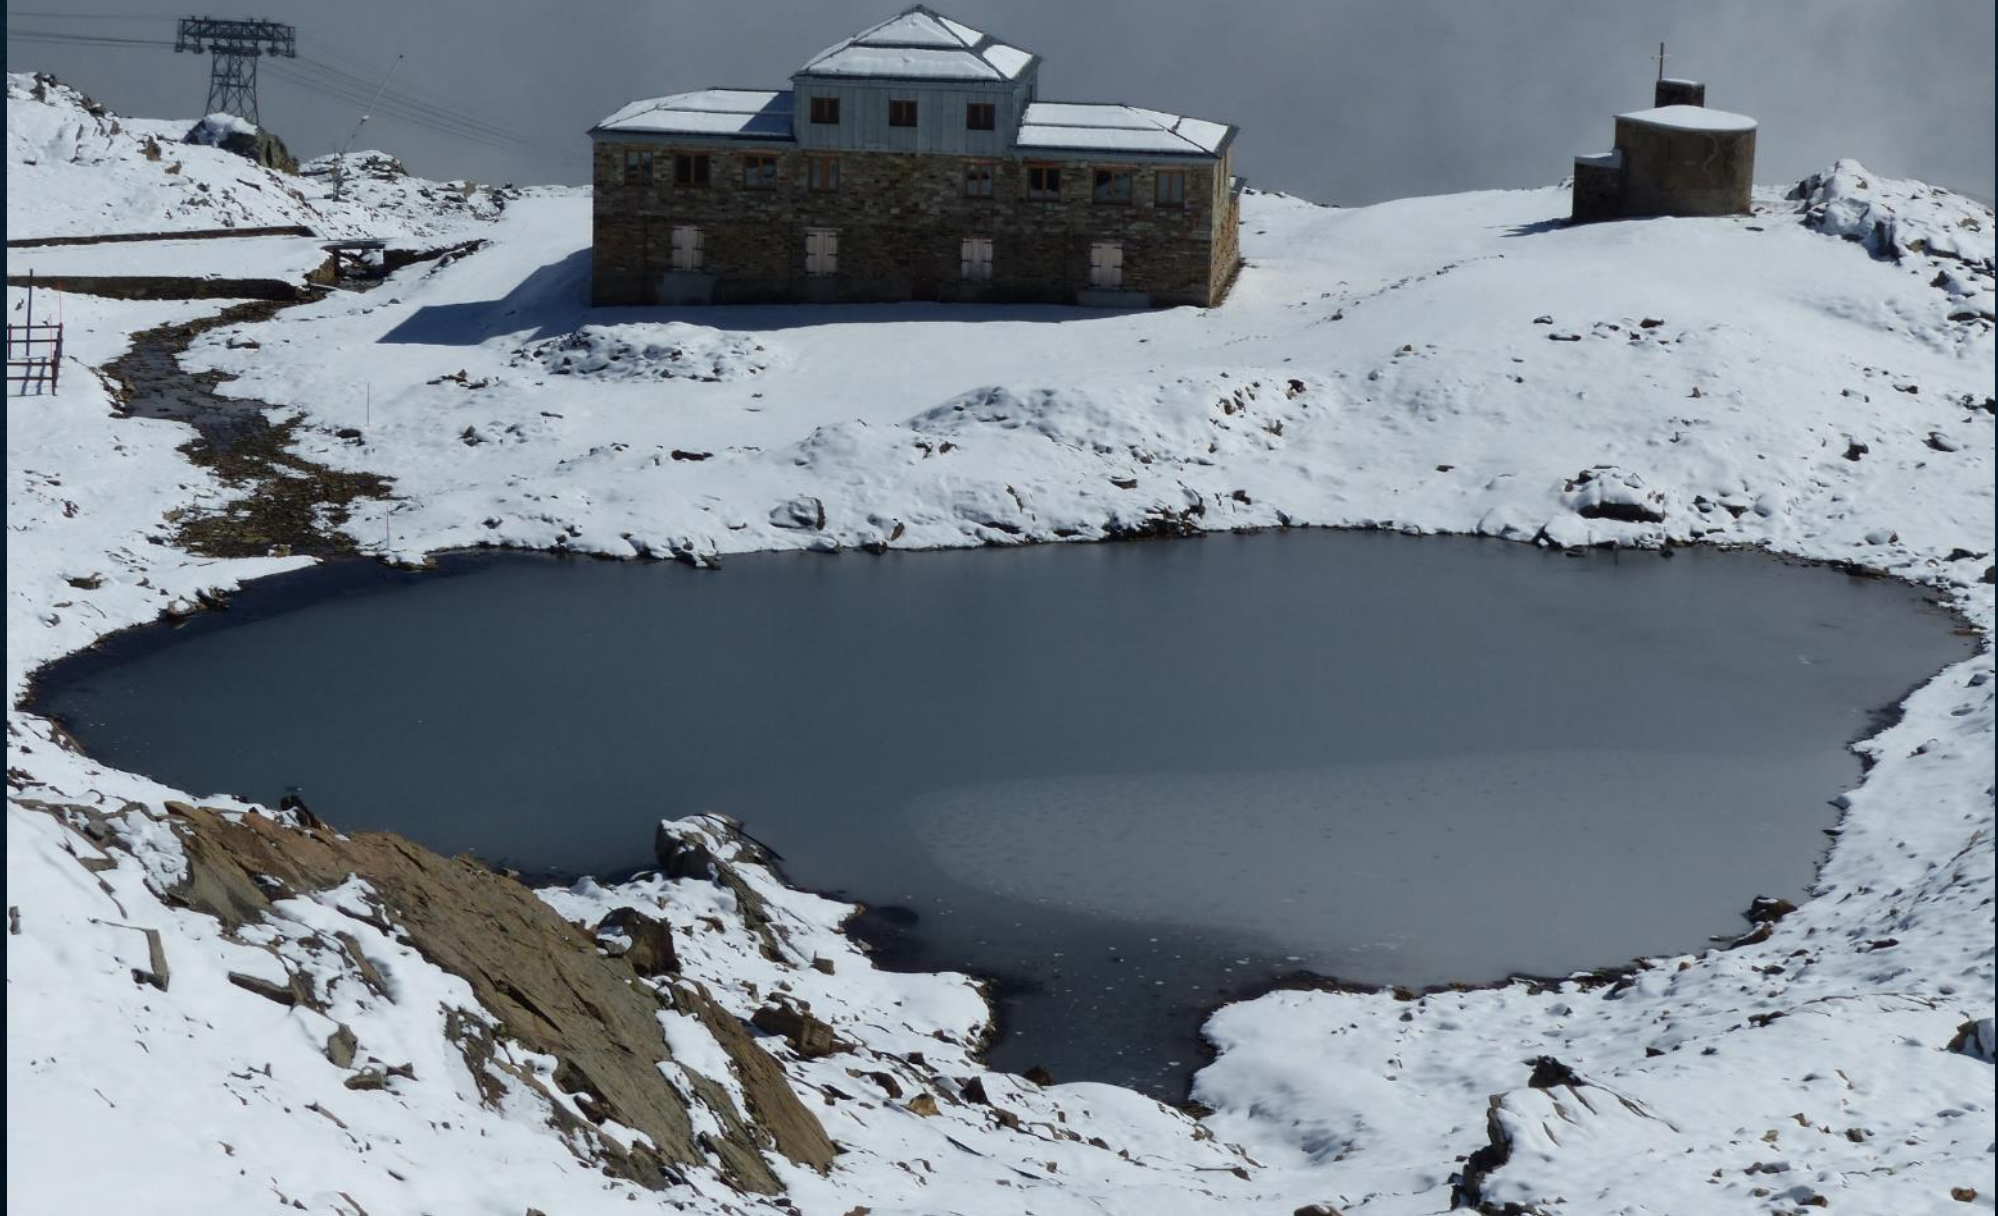



1846

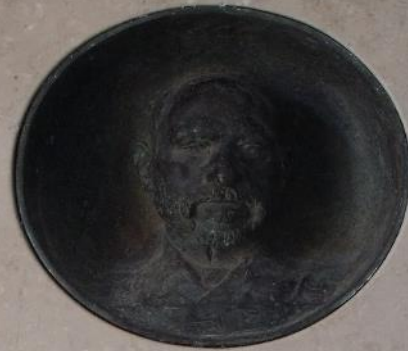

1910

PER GLI STUDI SEVERI  
PER L' ESPERIMENTO SAGACE  
PER LA PACE E LA VITA  
NELLA MAESTA' DELLE ALPI  
**ANGELO MOSSO**

CREAVA E DONAVA  
QUESTA SERENA DIMORA  
AI SUOI ALLIEVI  
A QUELLI CHE ANCORA  
NON ERANO



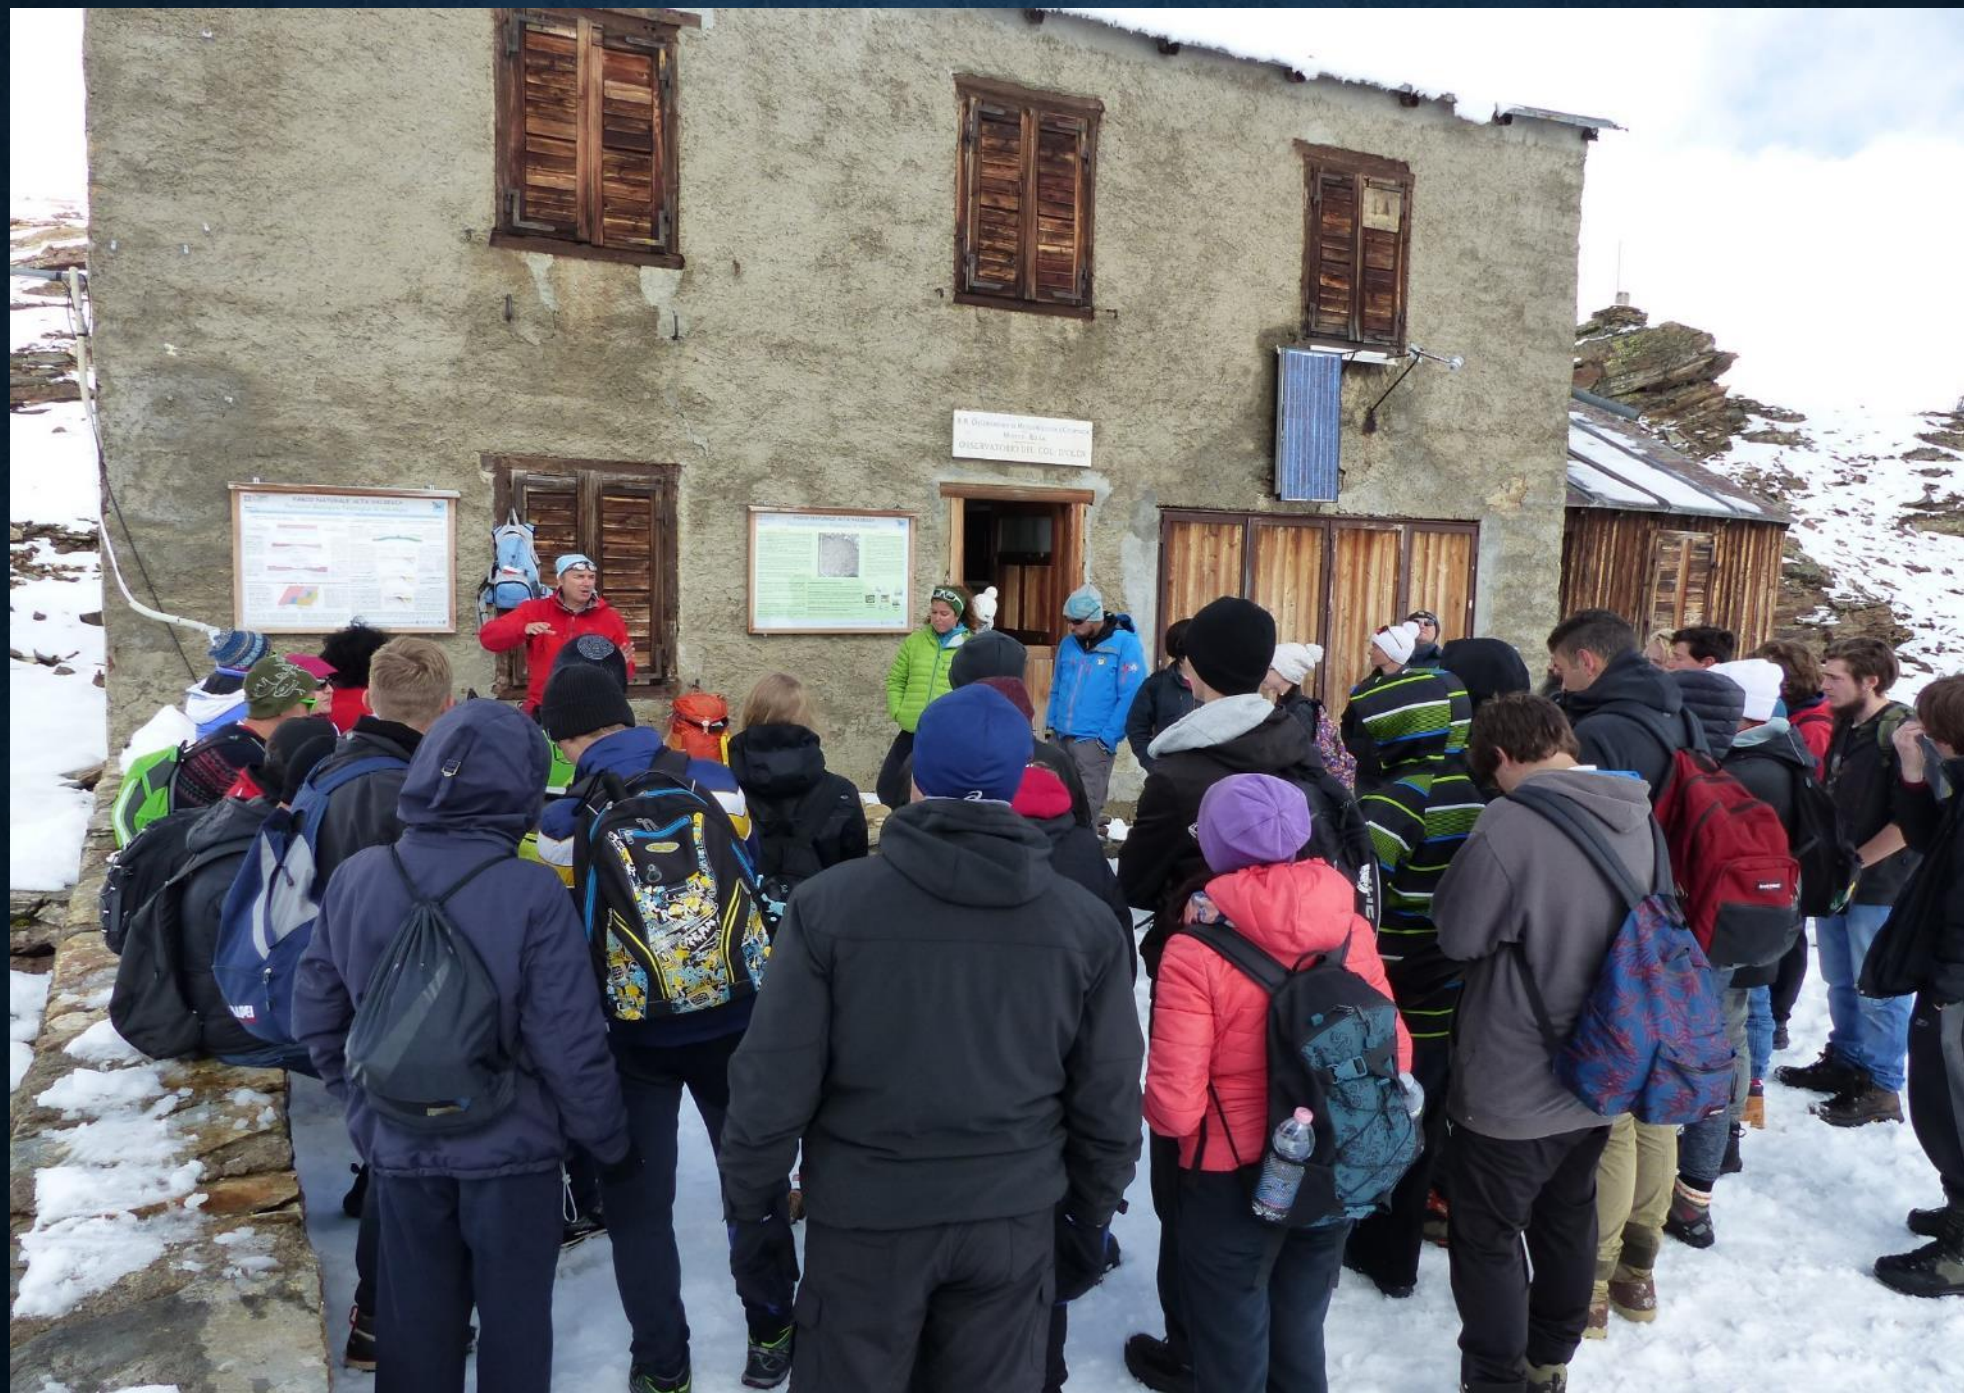



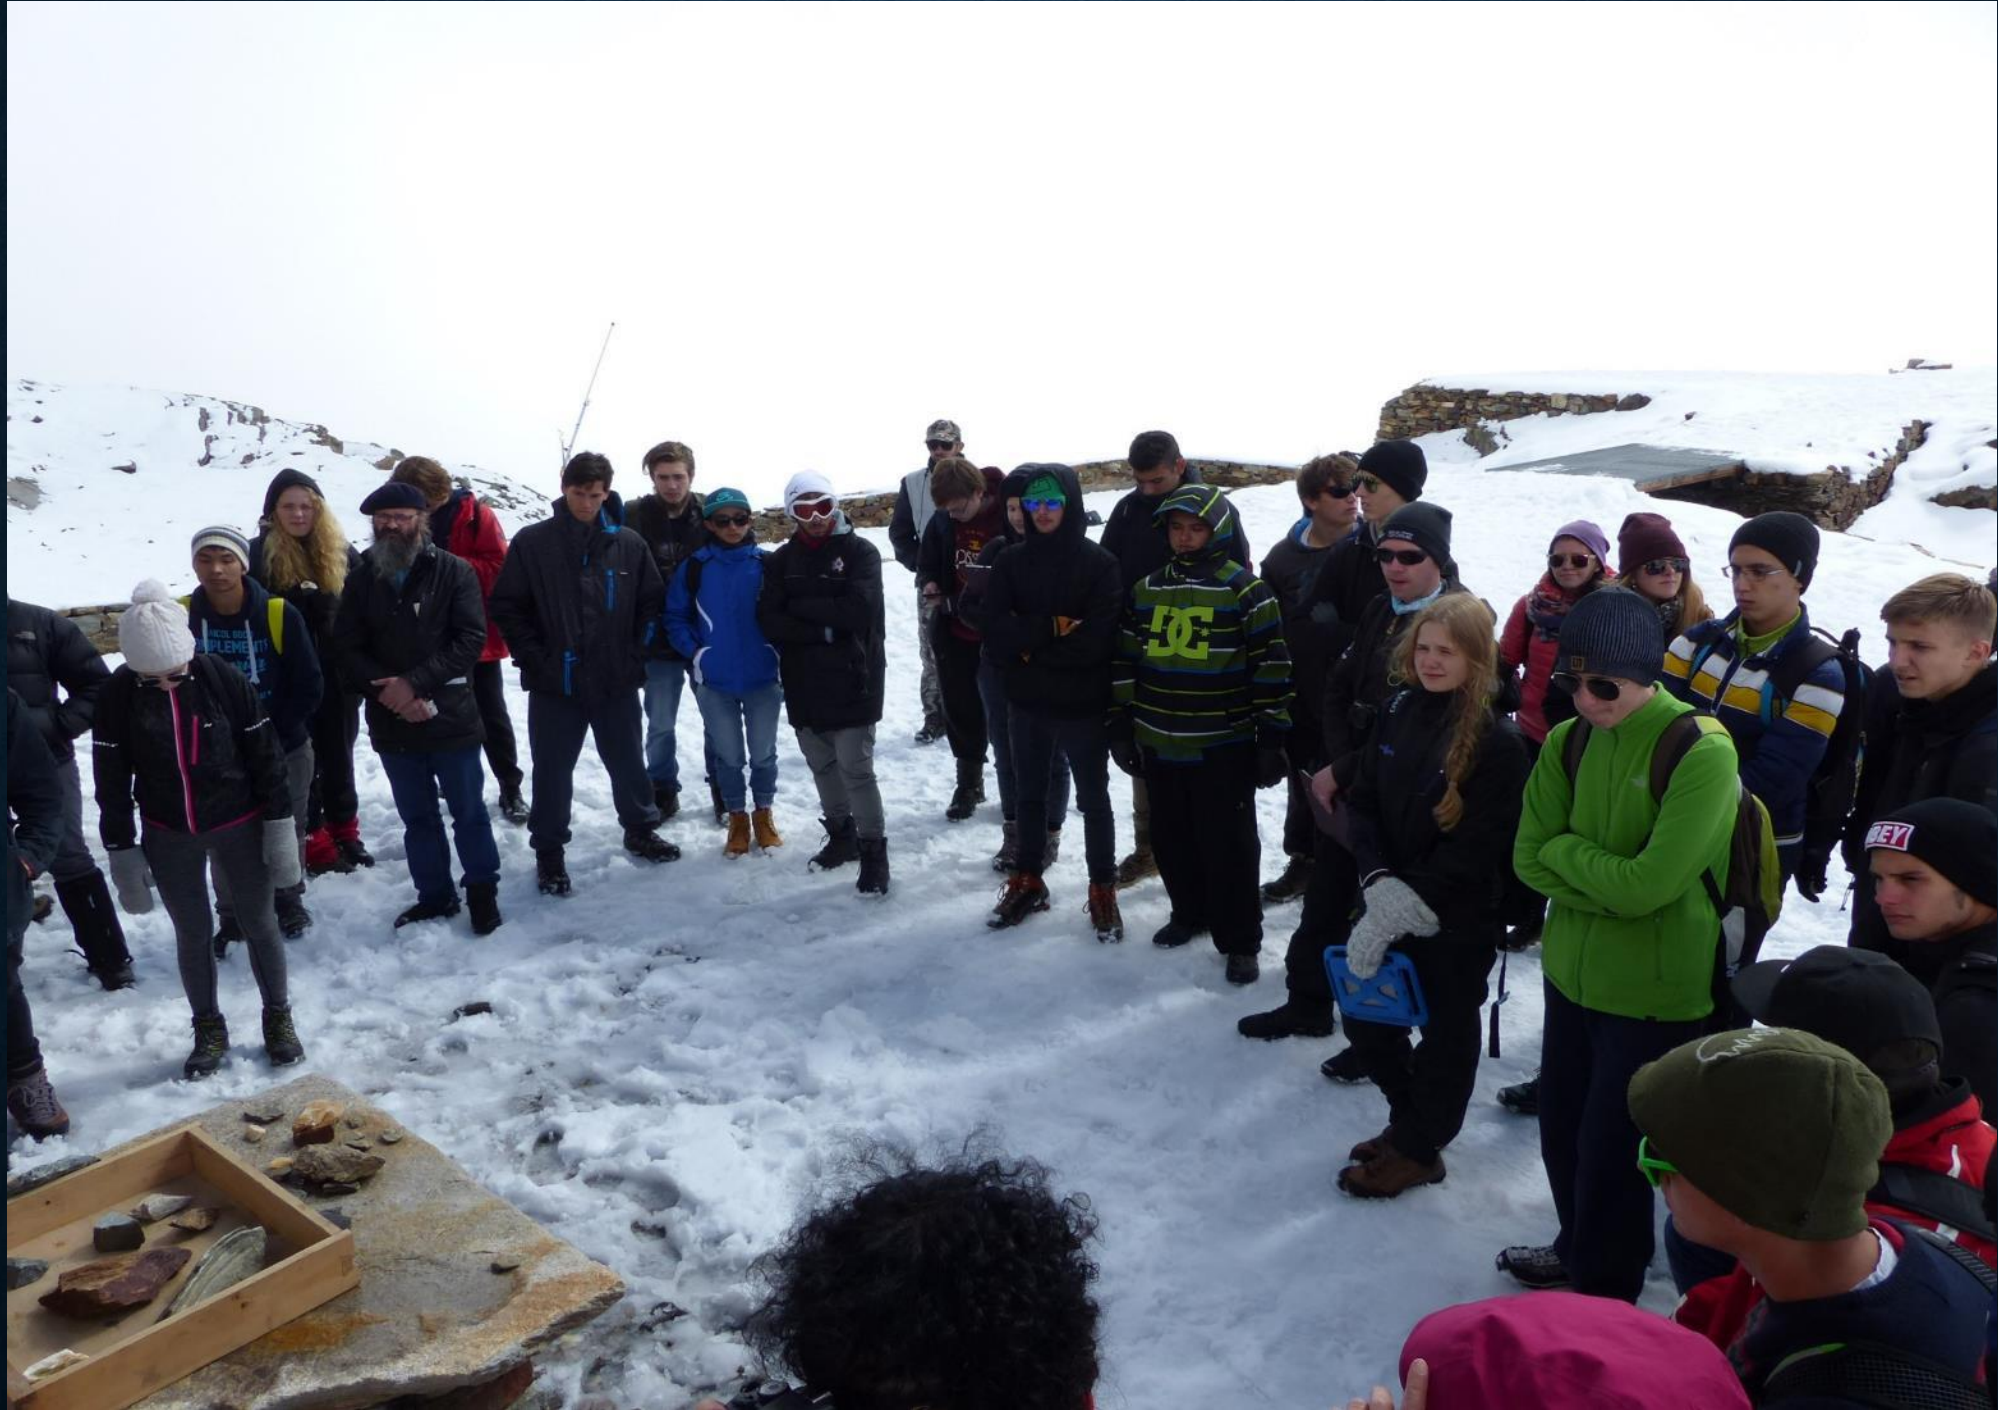



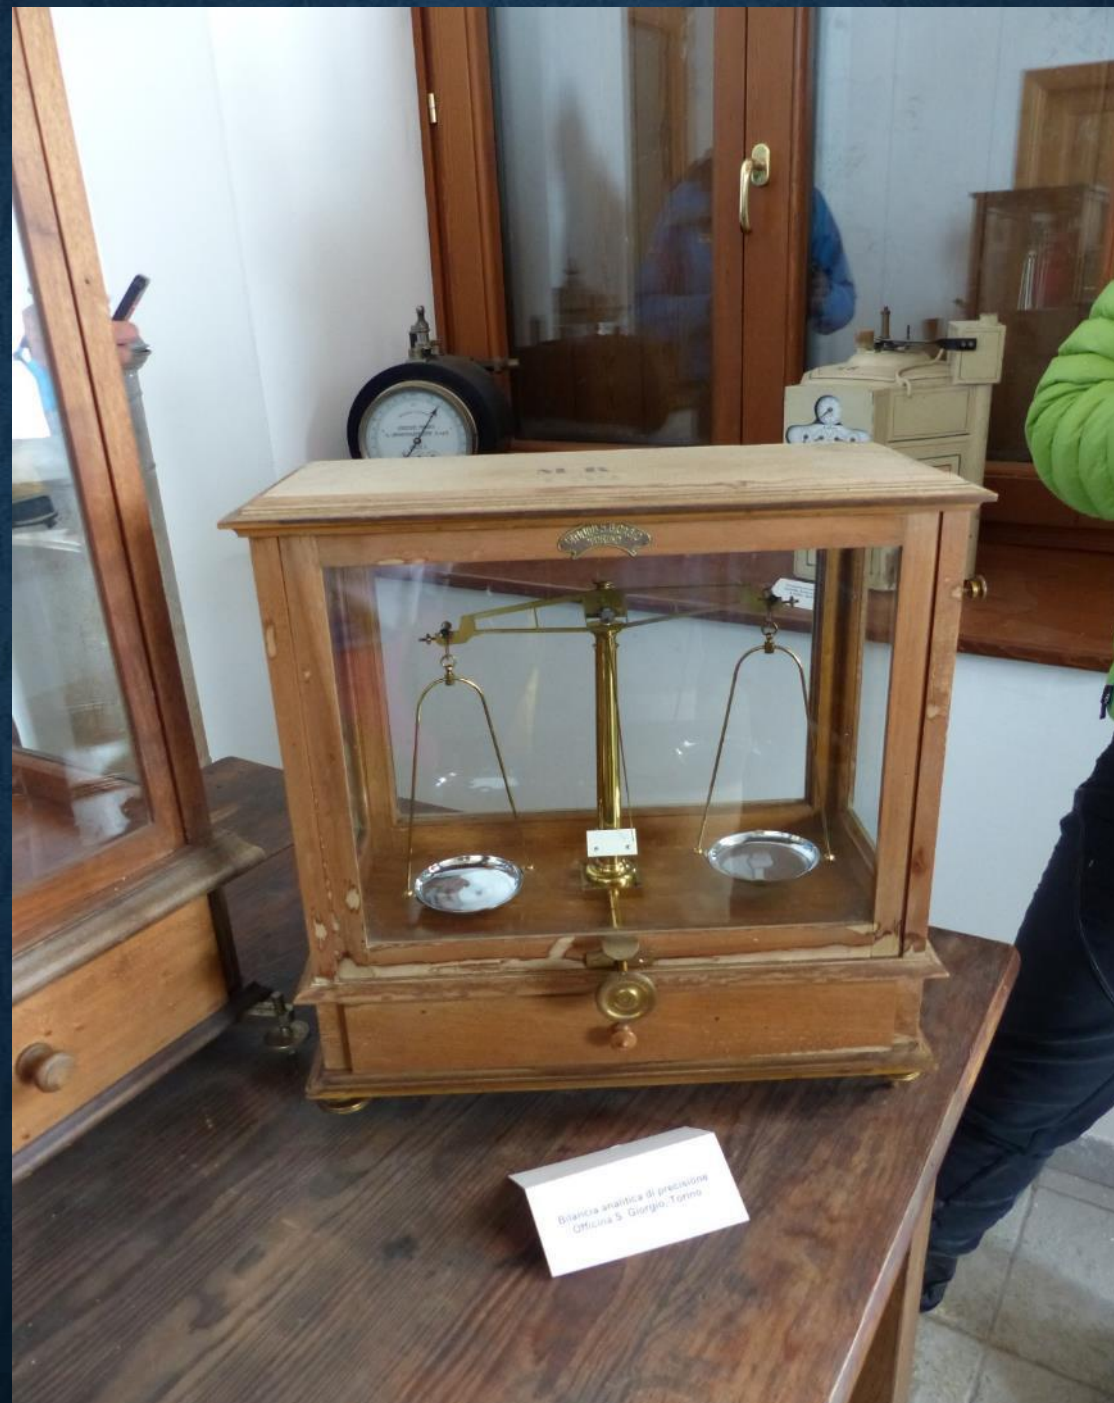

Bilancia analitica di precisione  
Officina S. Giorgio, Torino



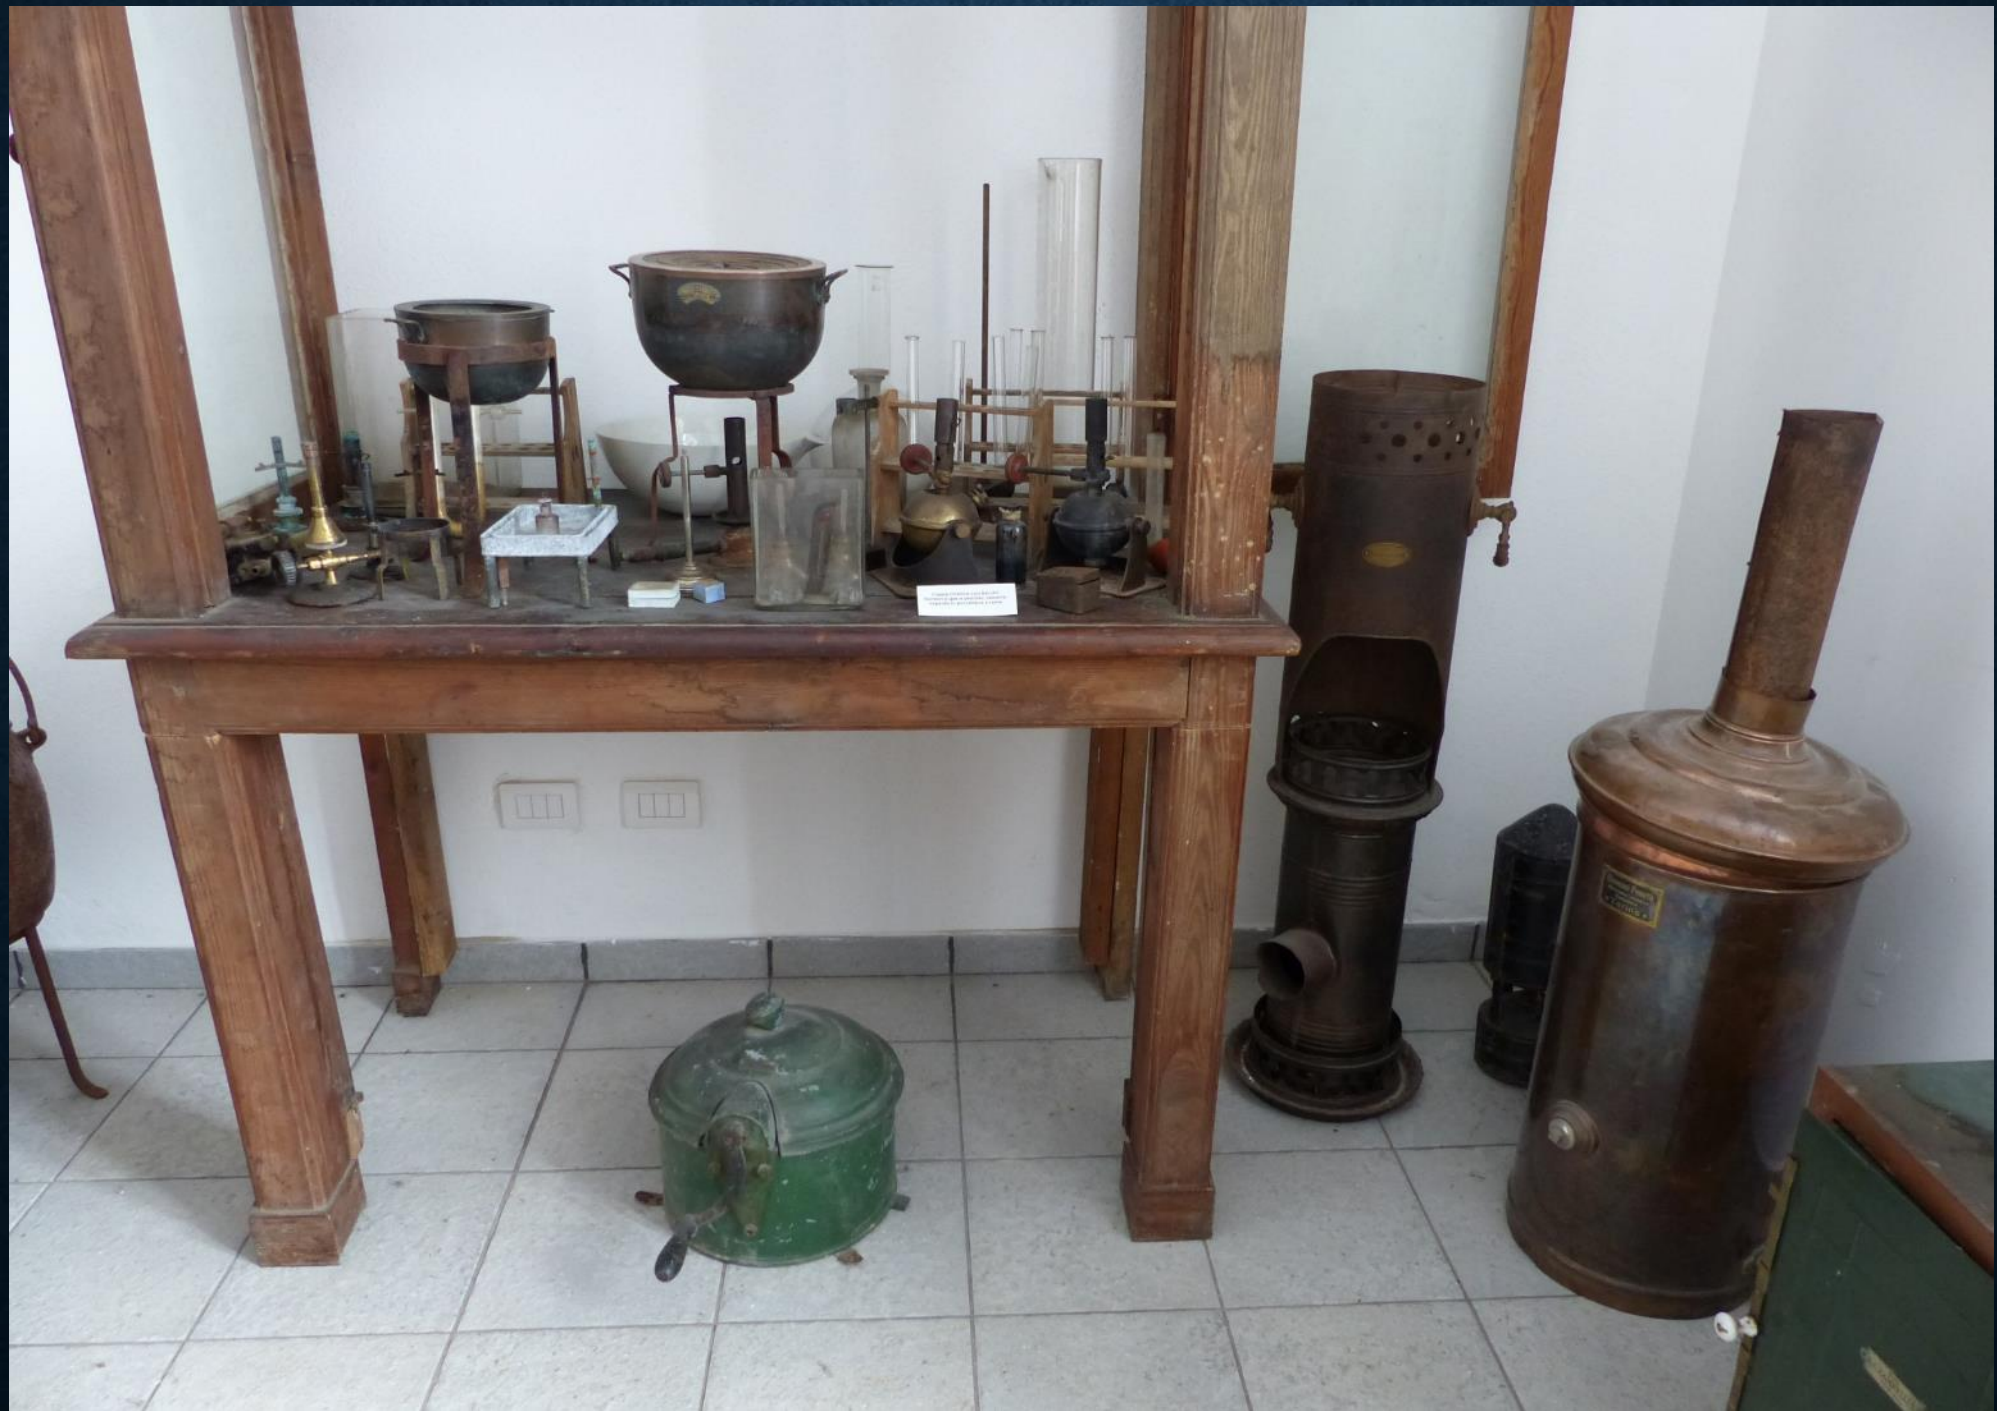



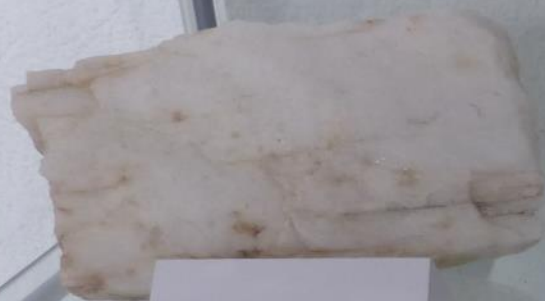

Quarzite

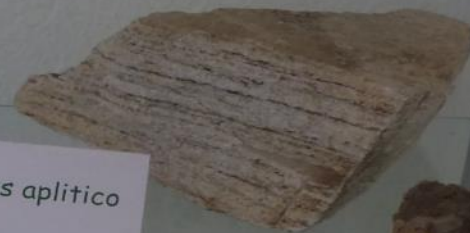

Gneiss aplítico

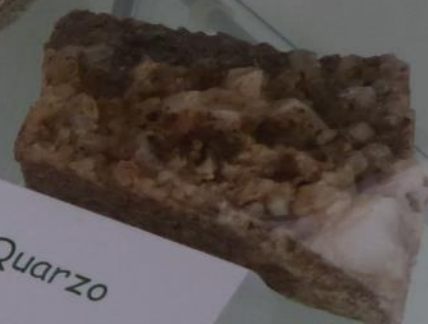

Quarzo

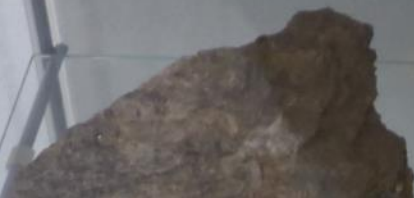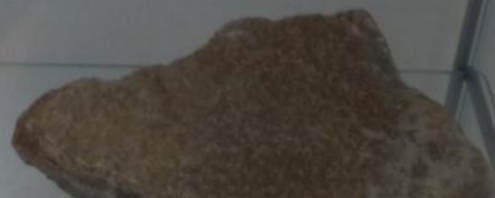



## Activities in groups

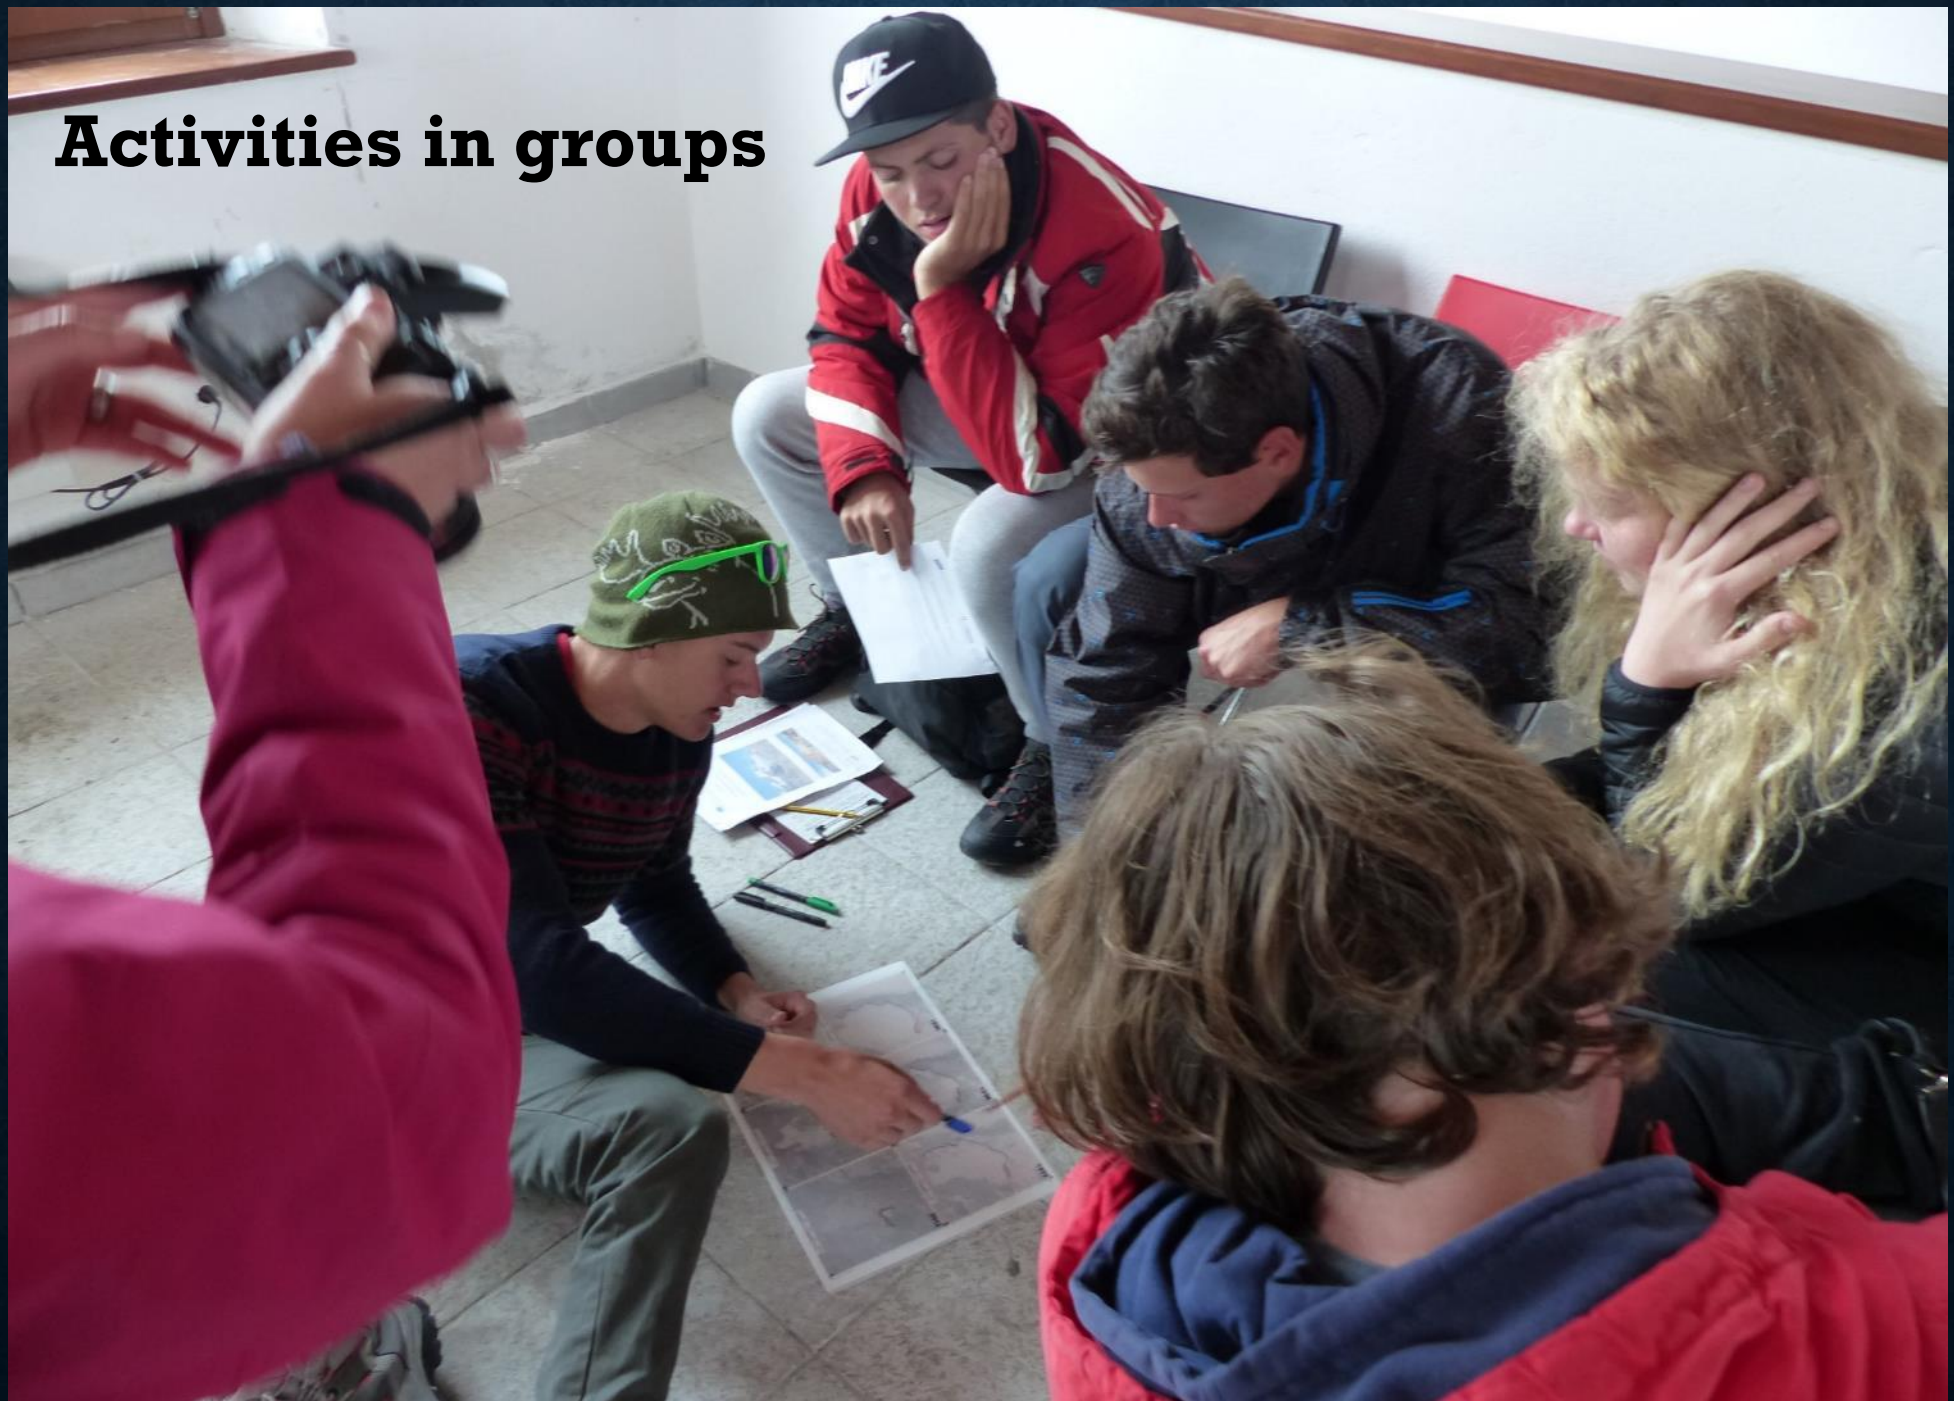



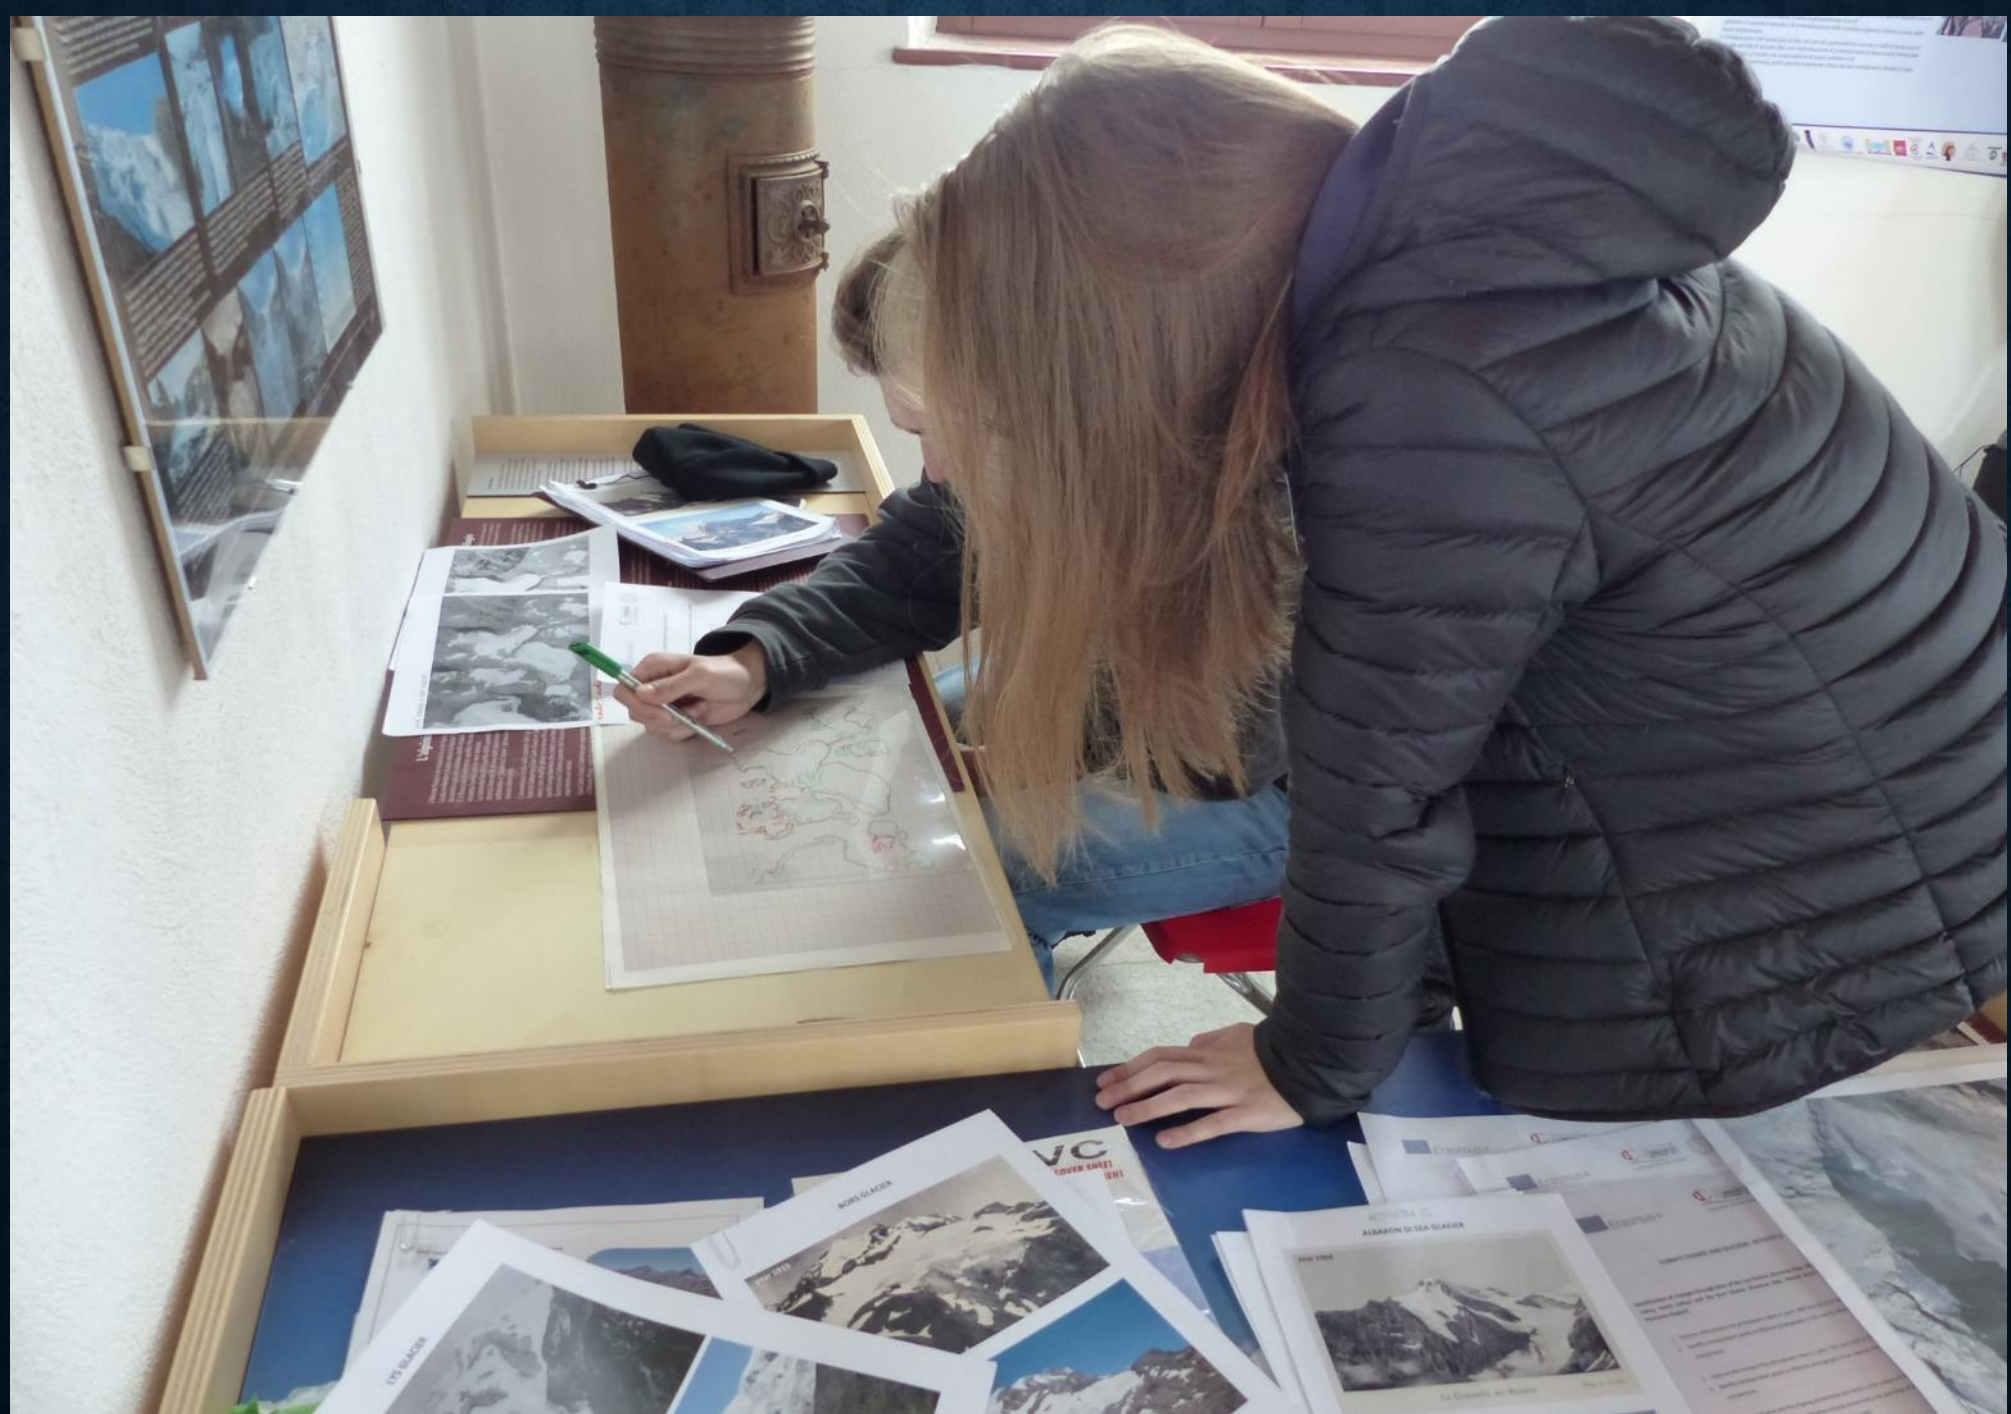



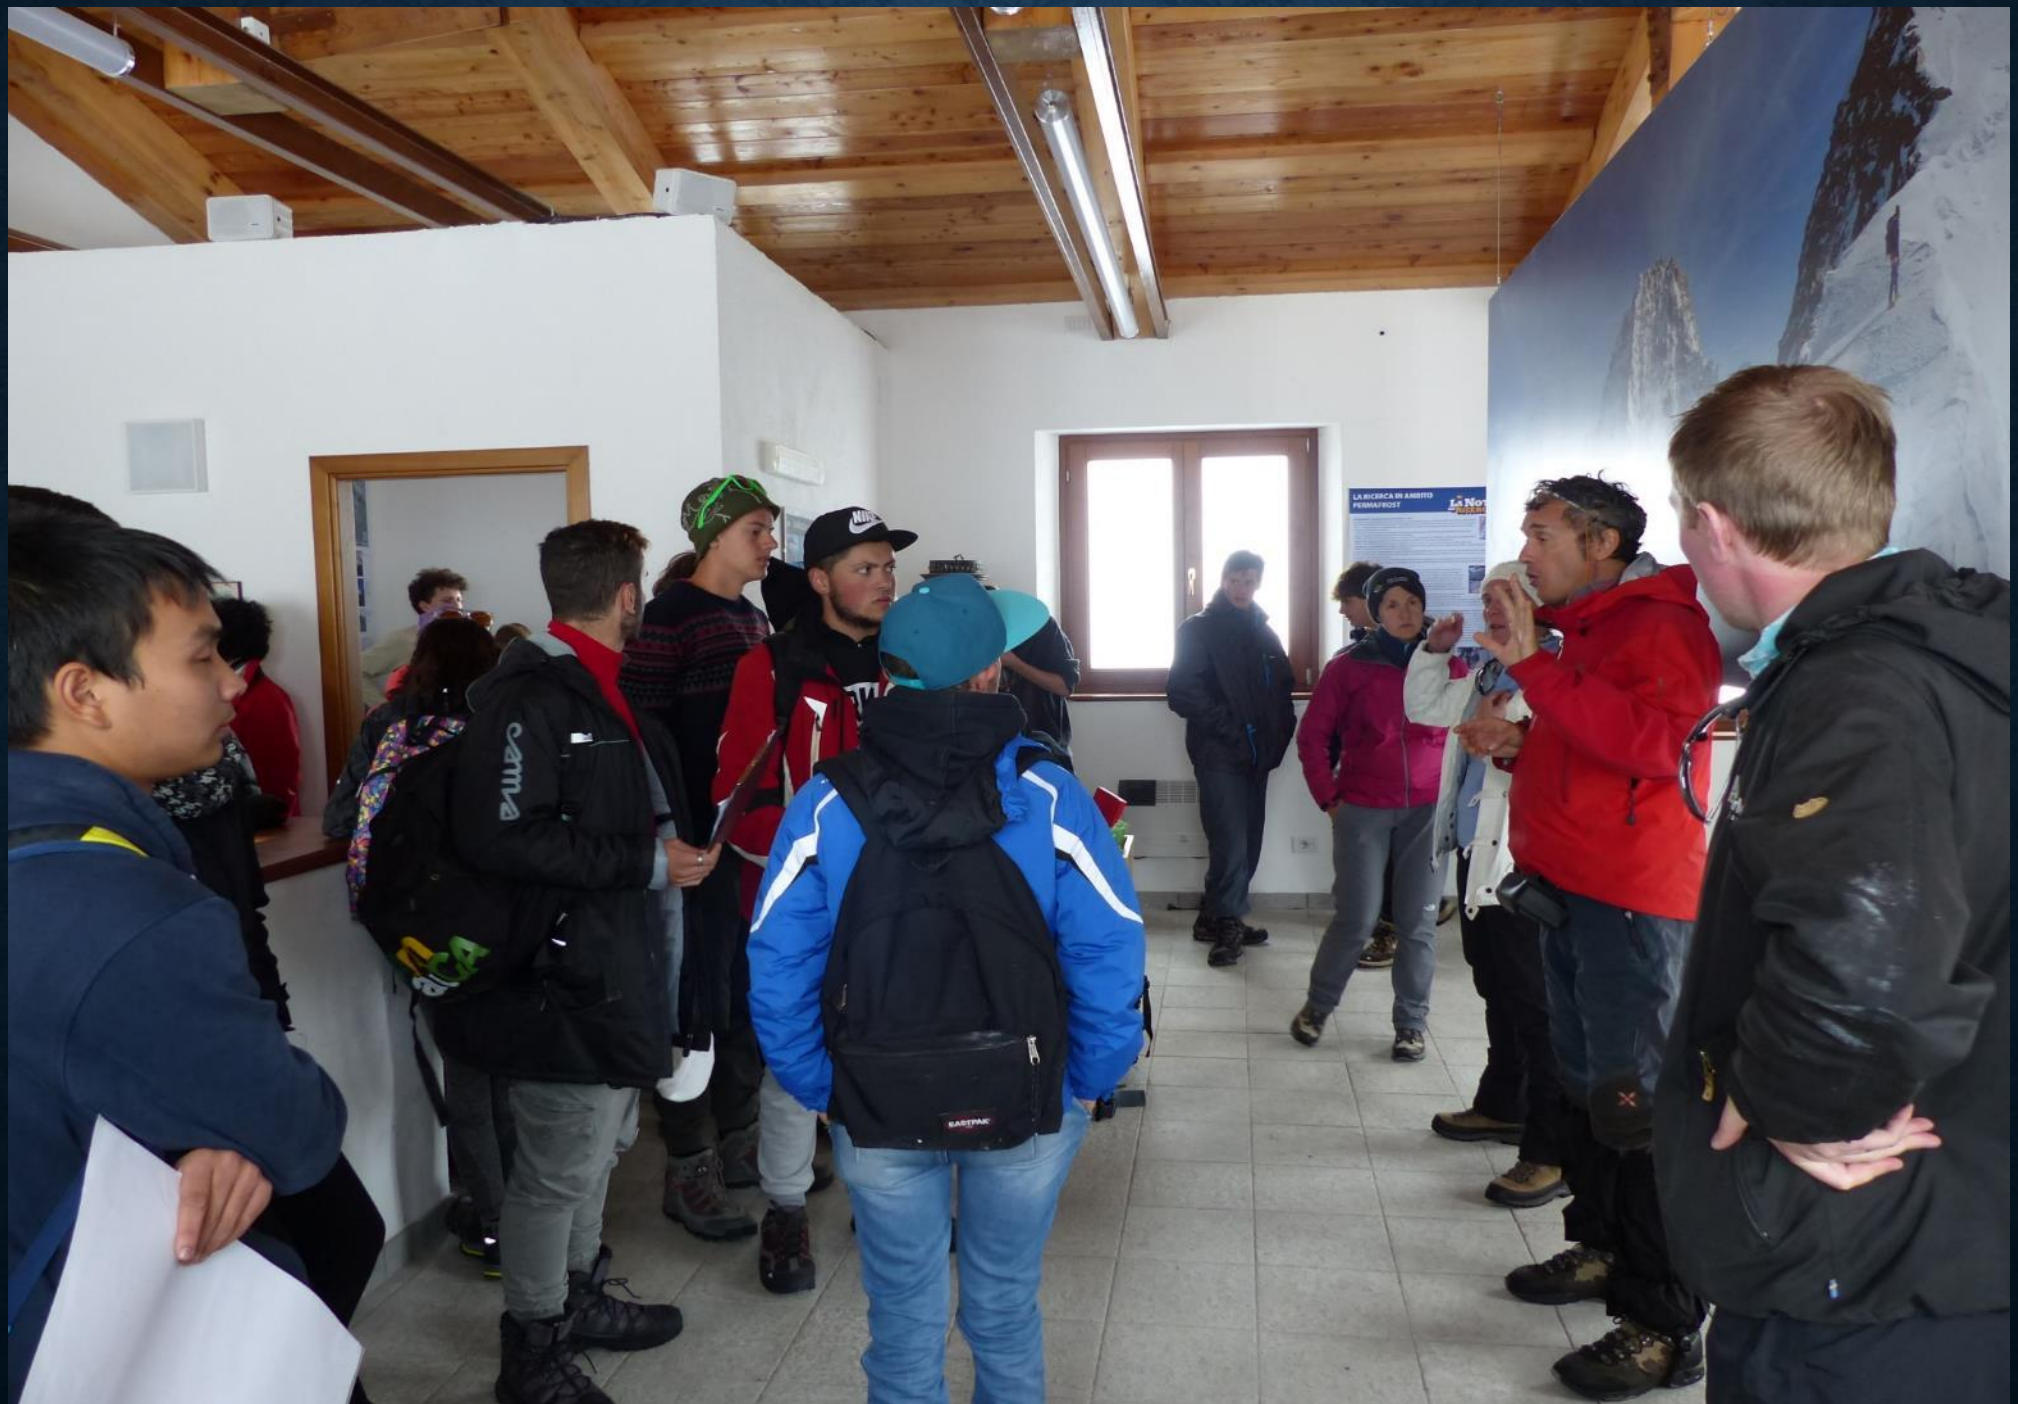



# Visiting the Botanical Garden in Verbania

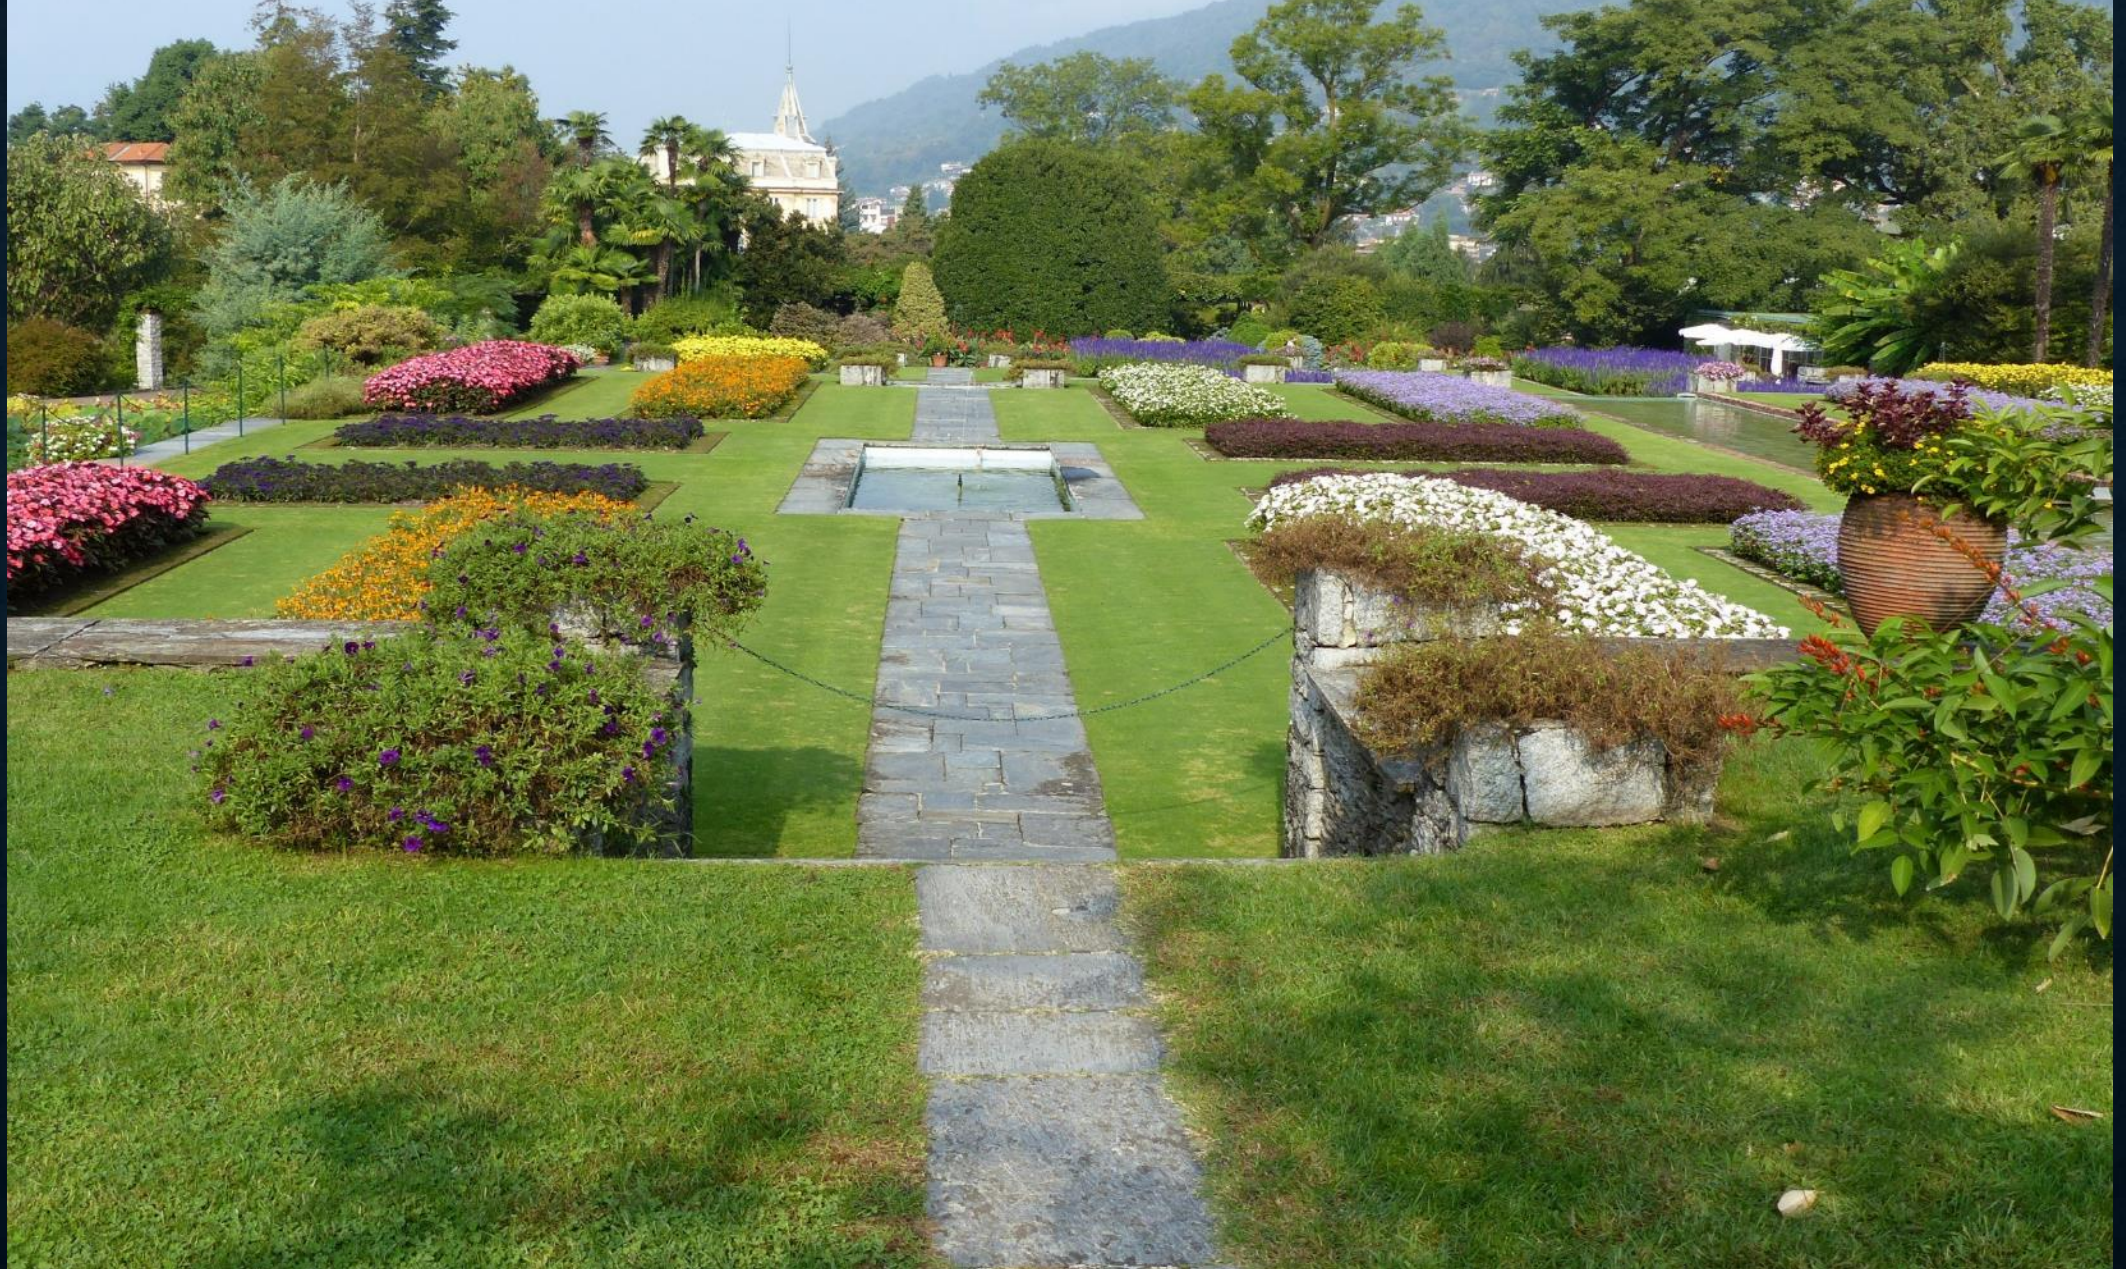



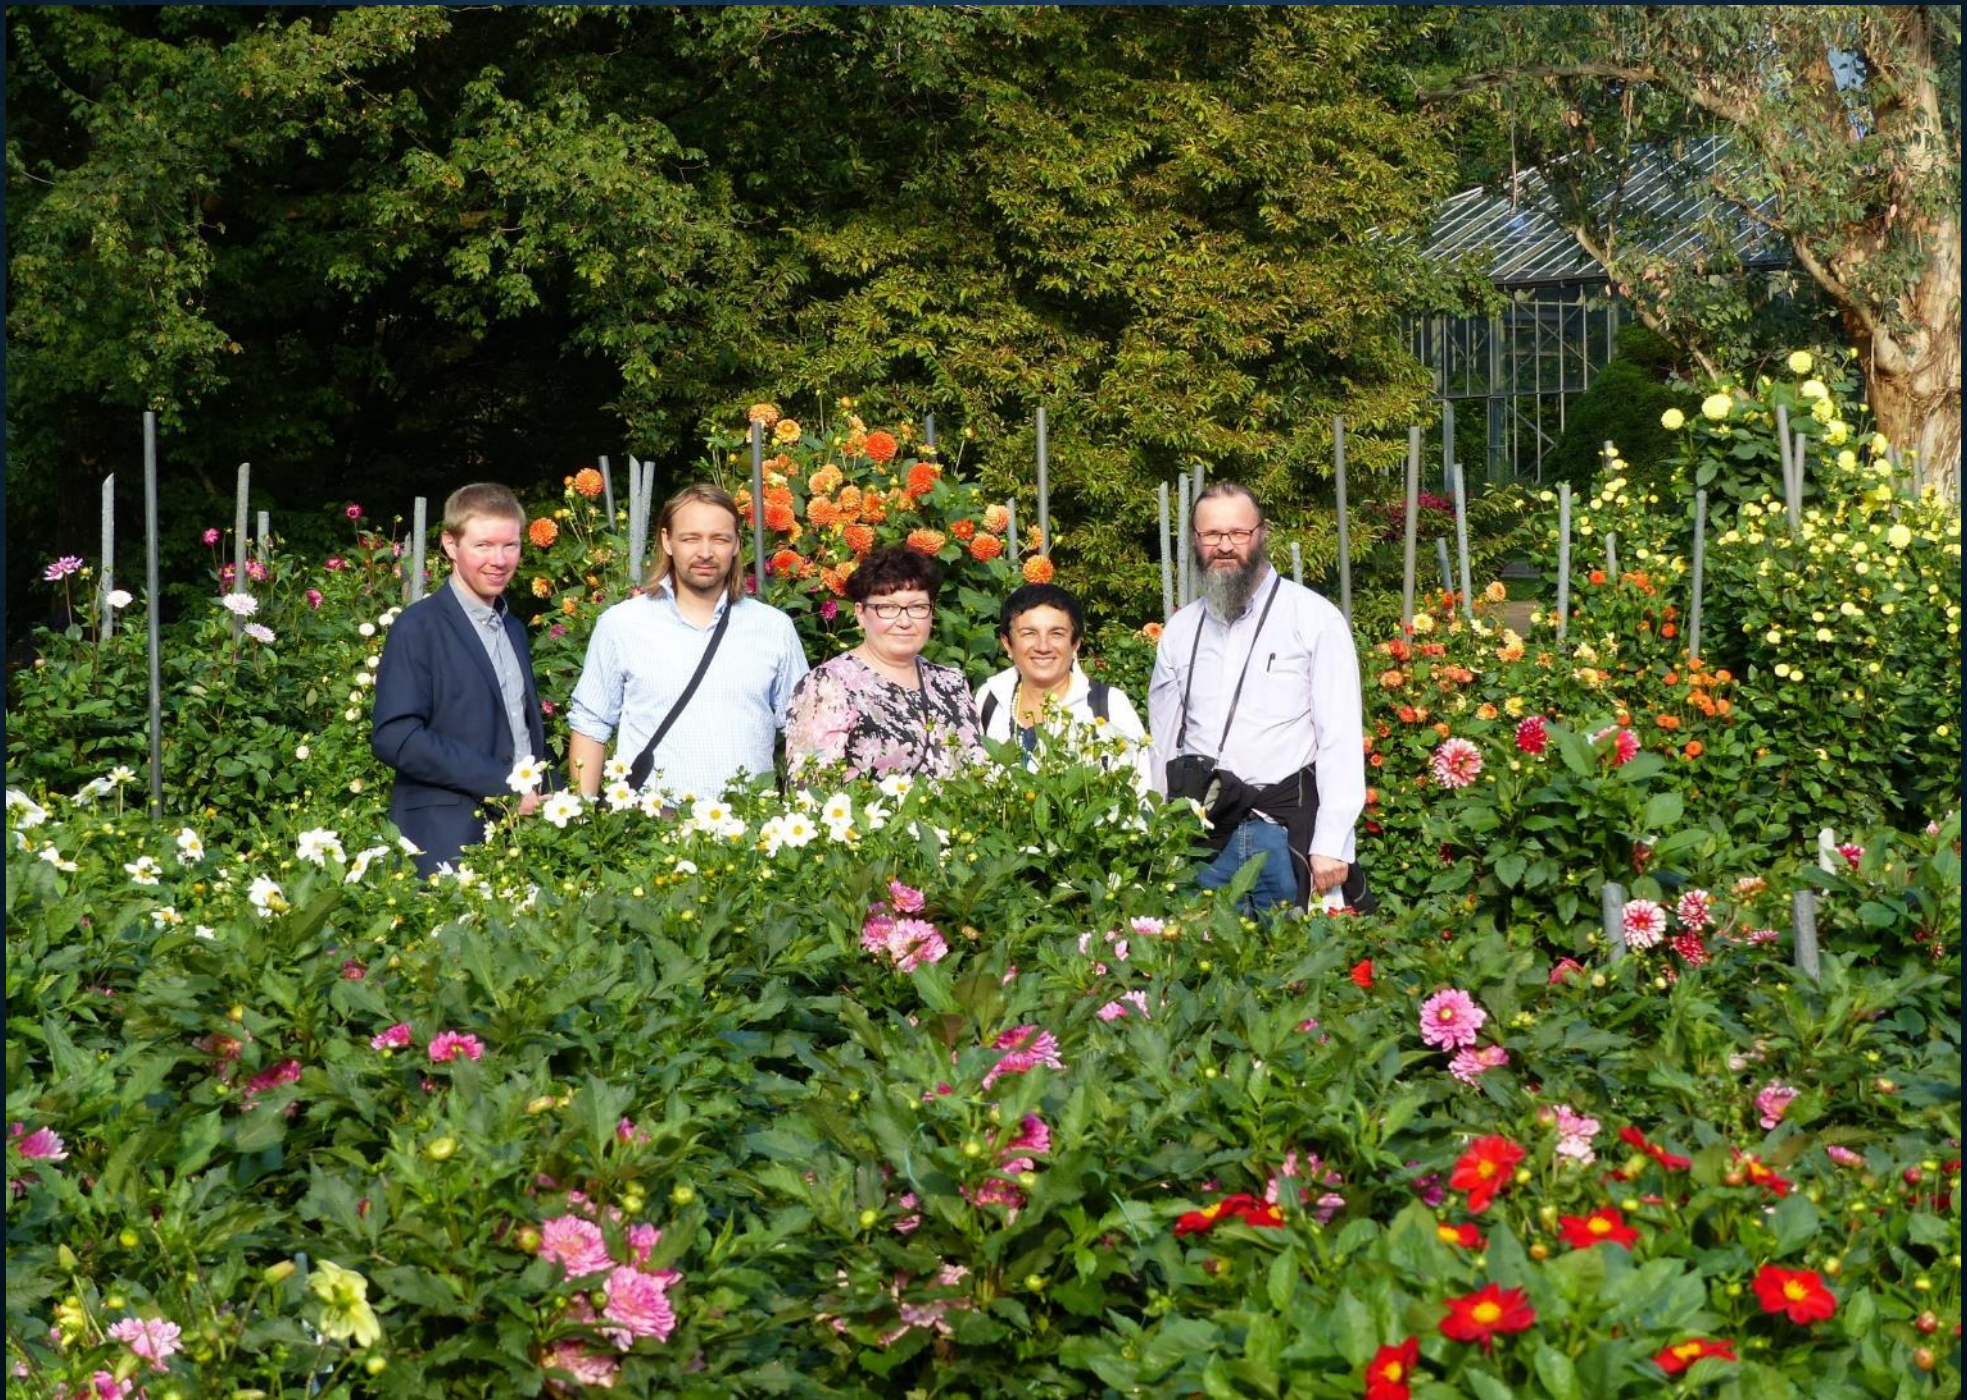



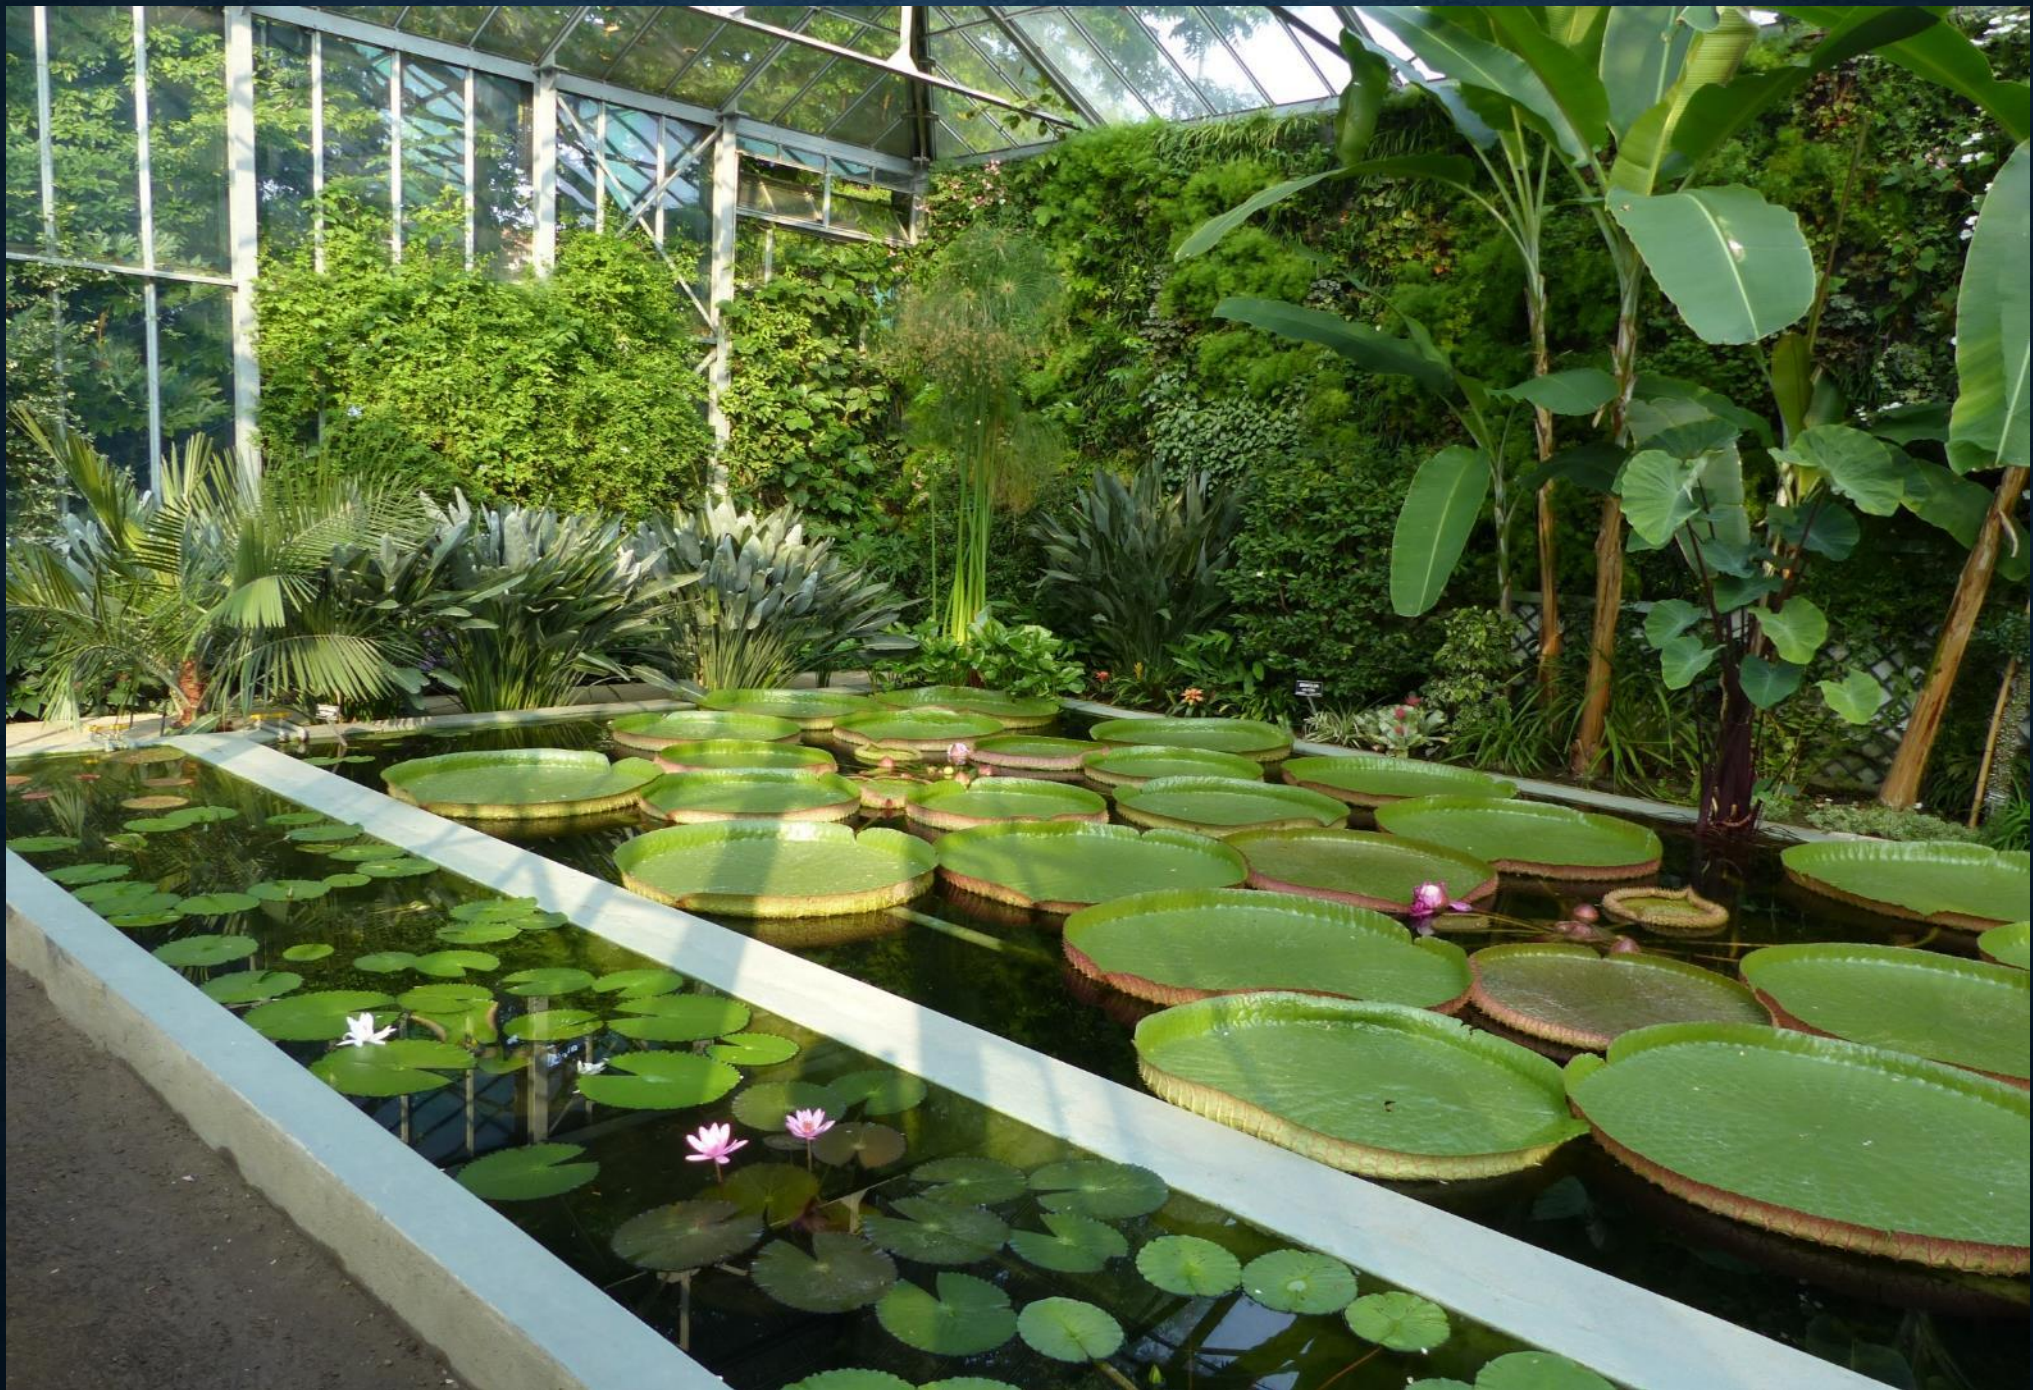



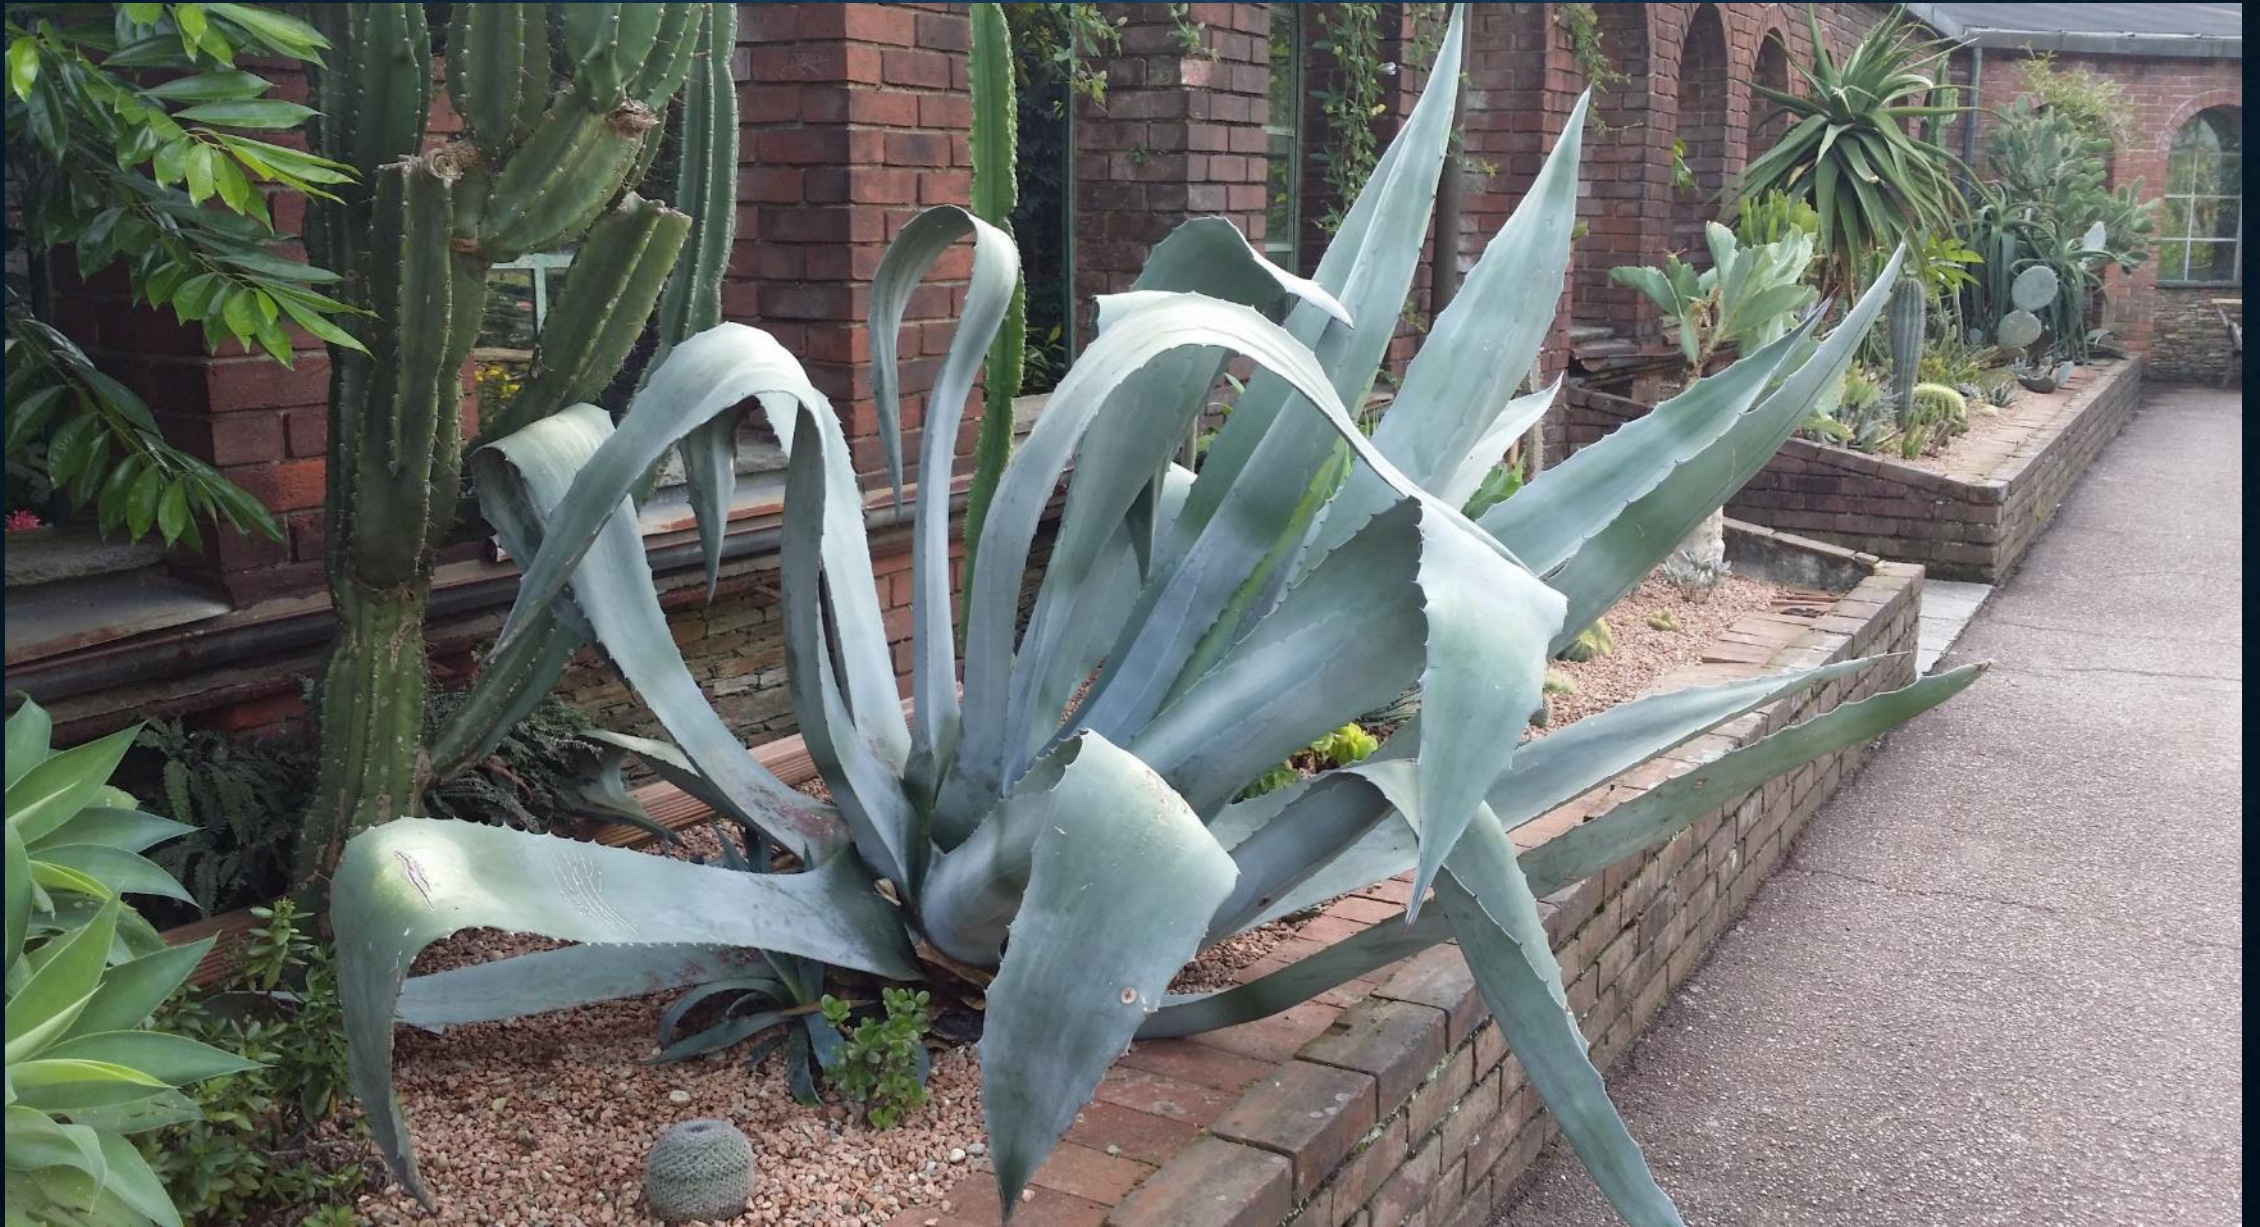



**What a wonderful week!**

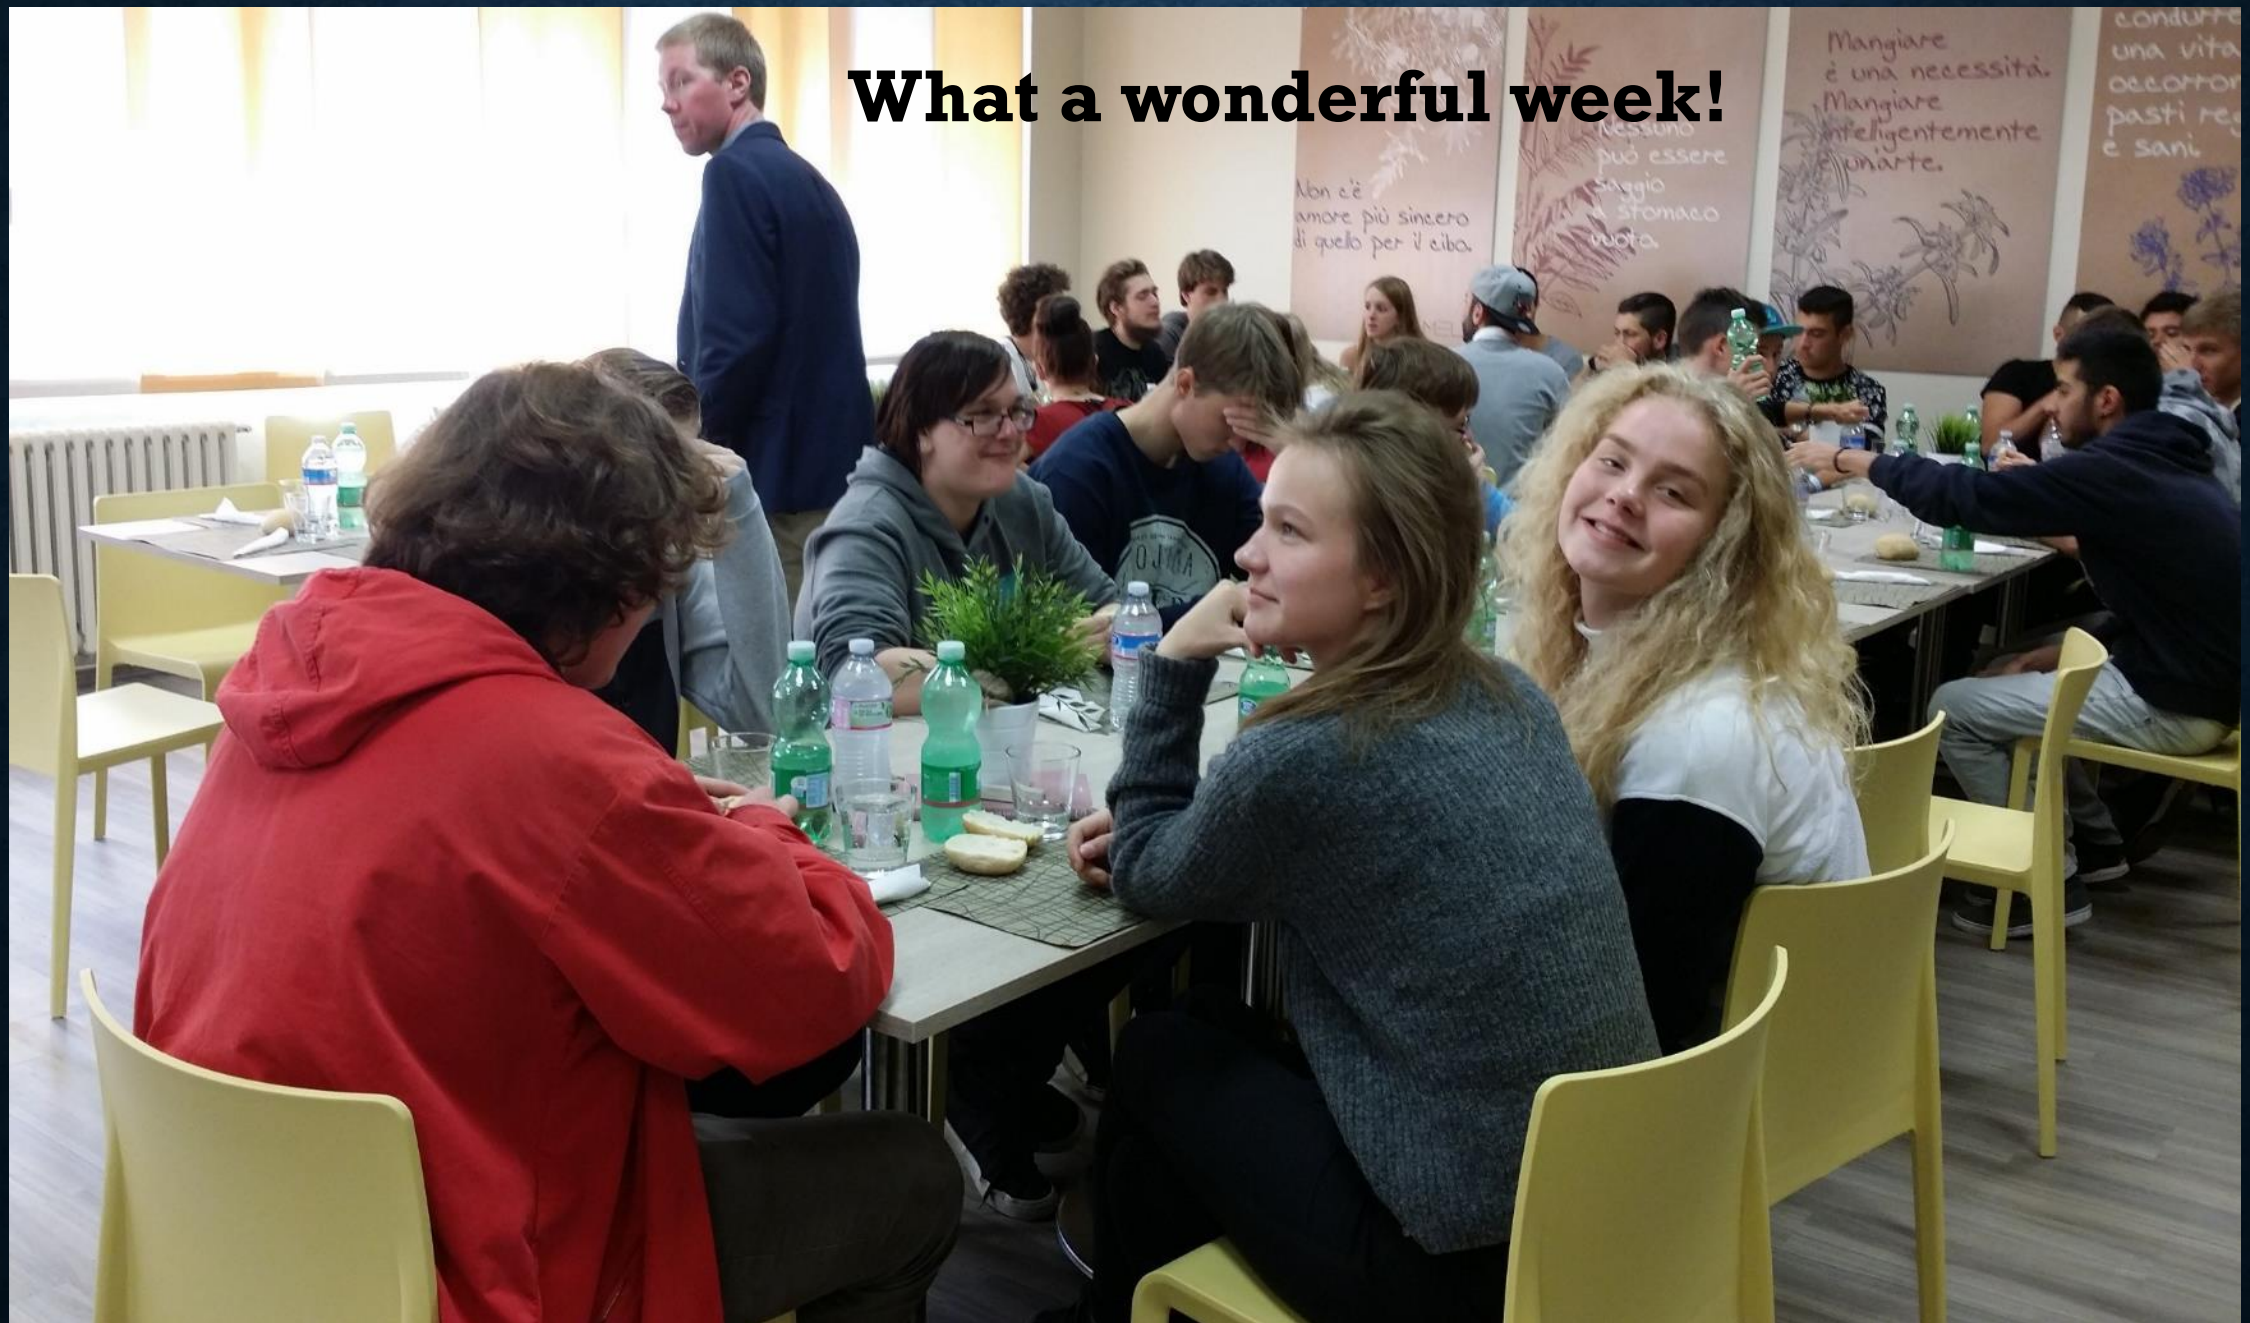



**Preparing presentations for the  
farewell party.**

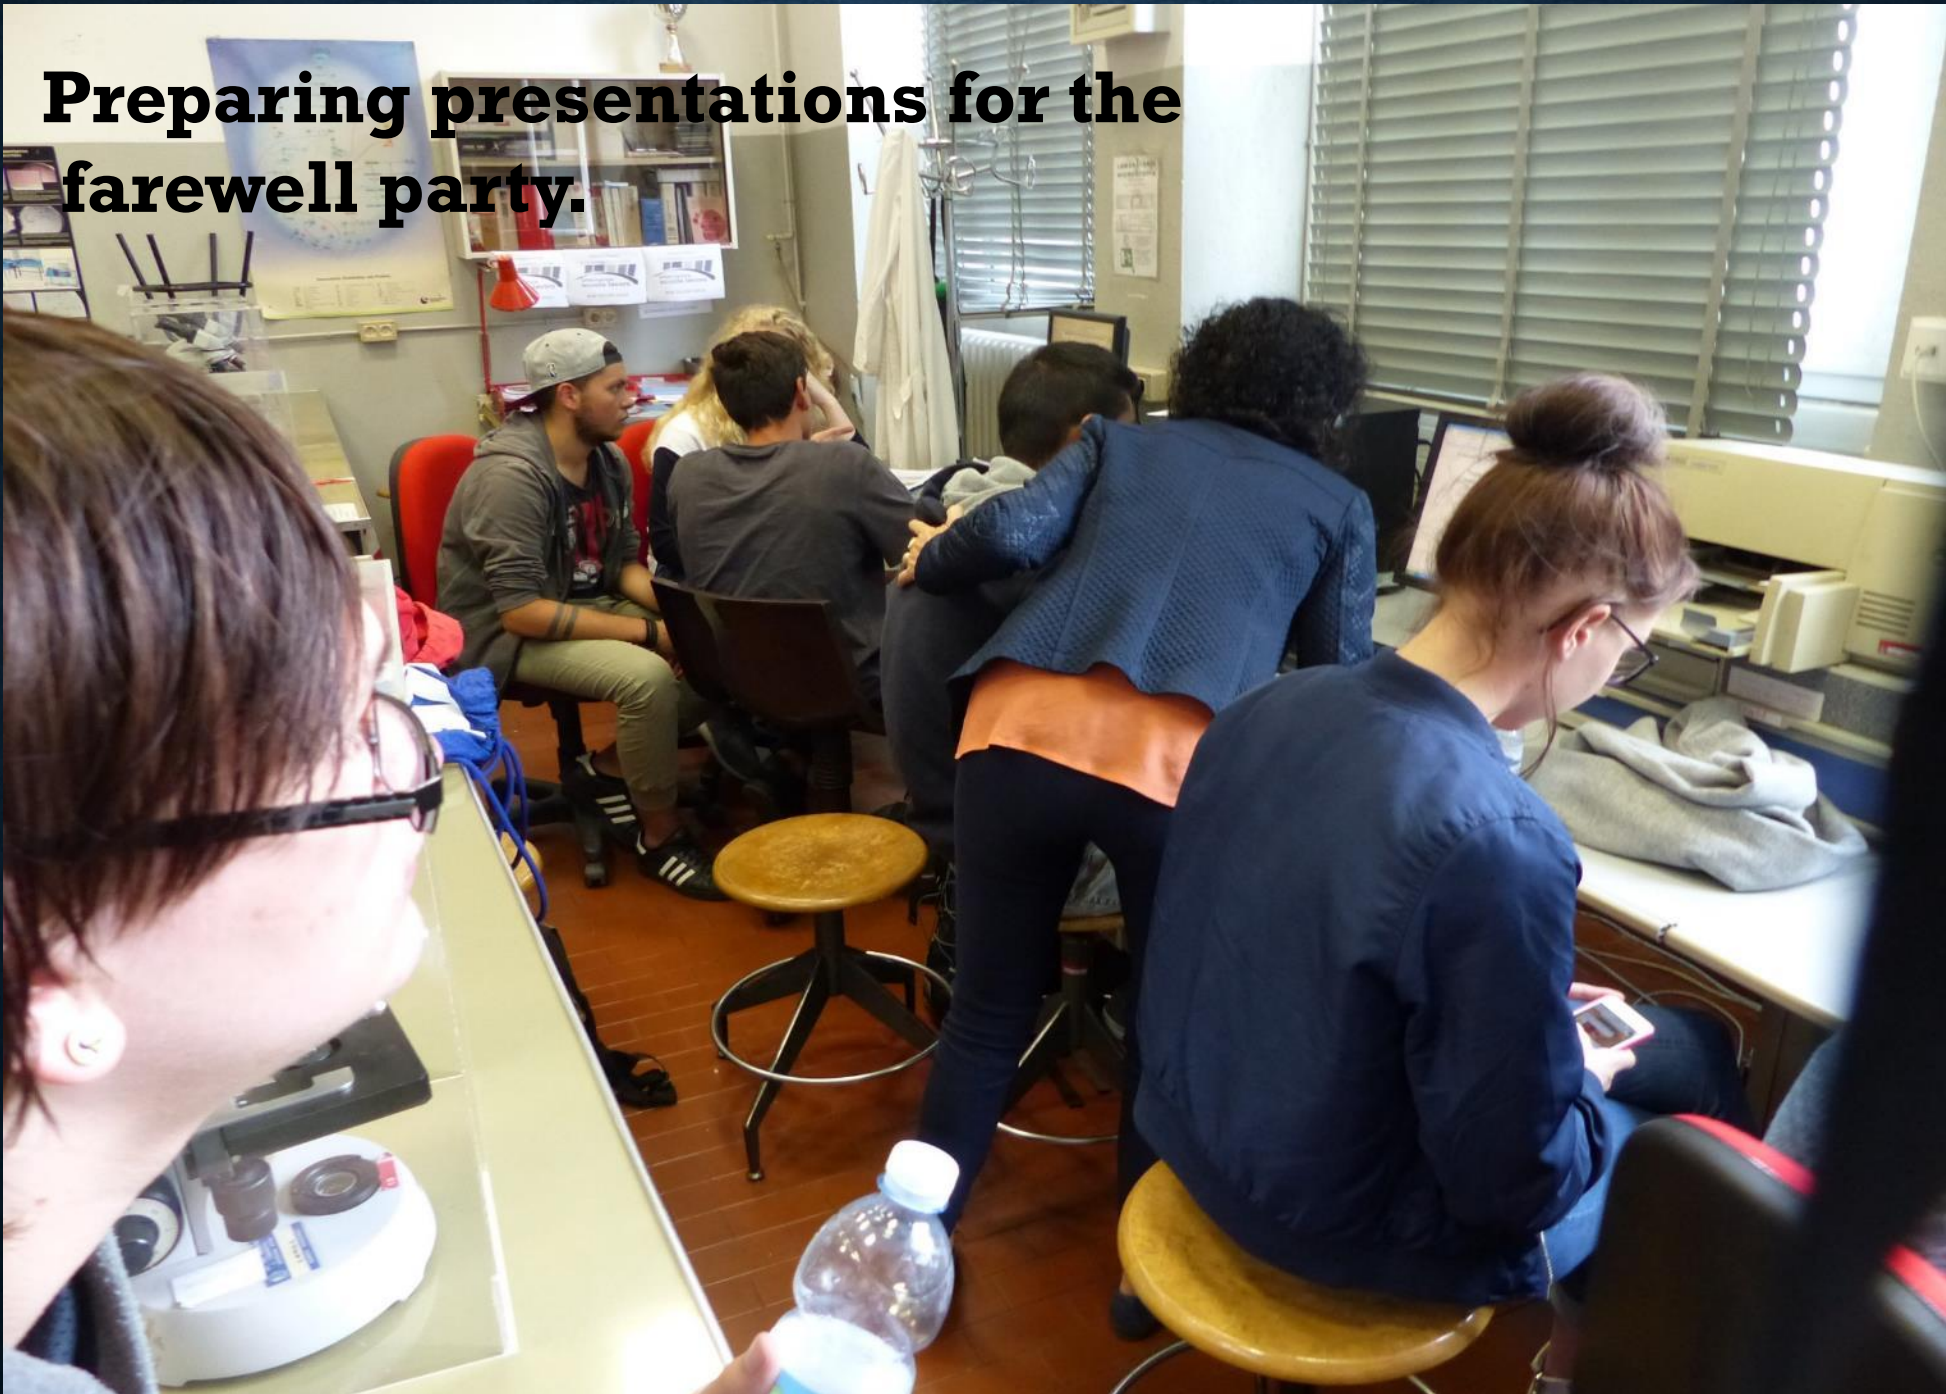



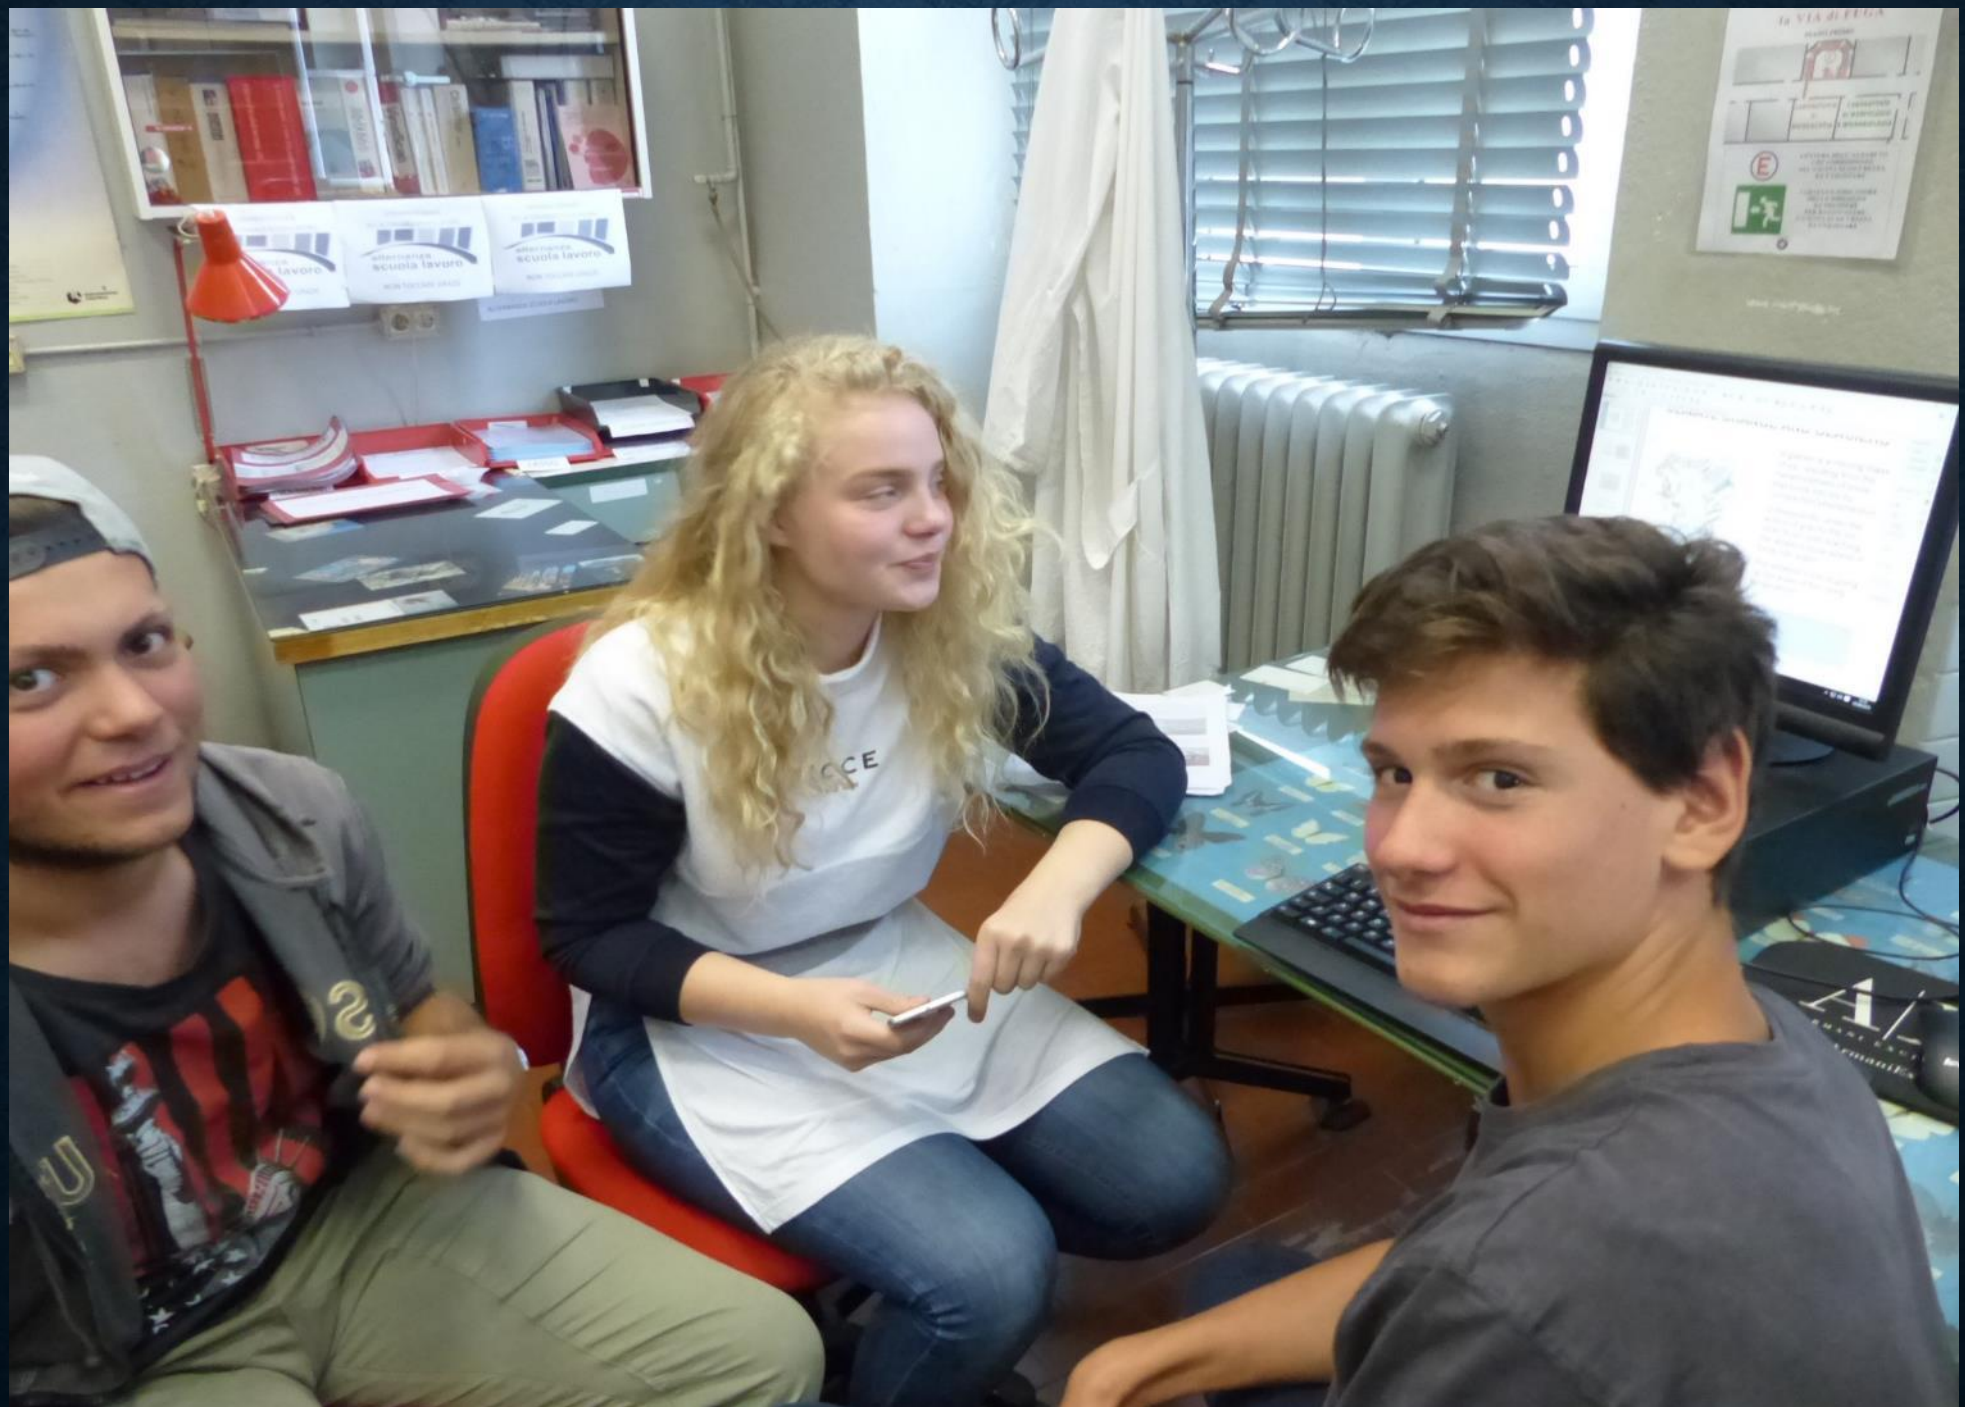



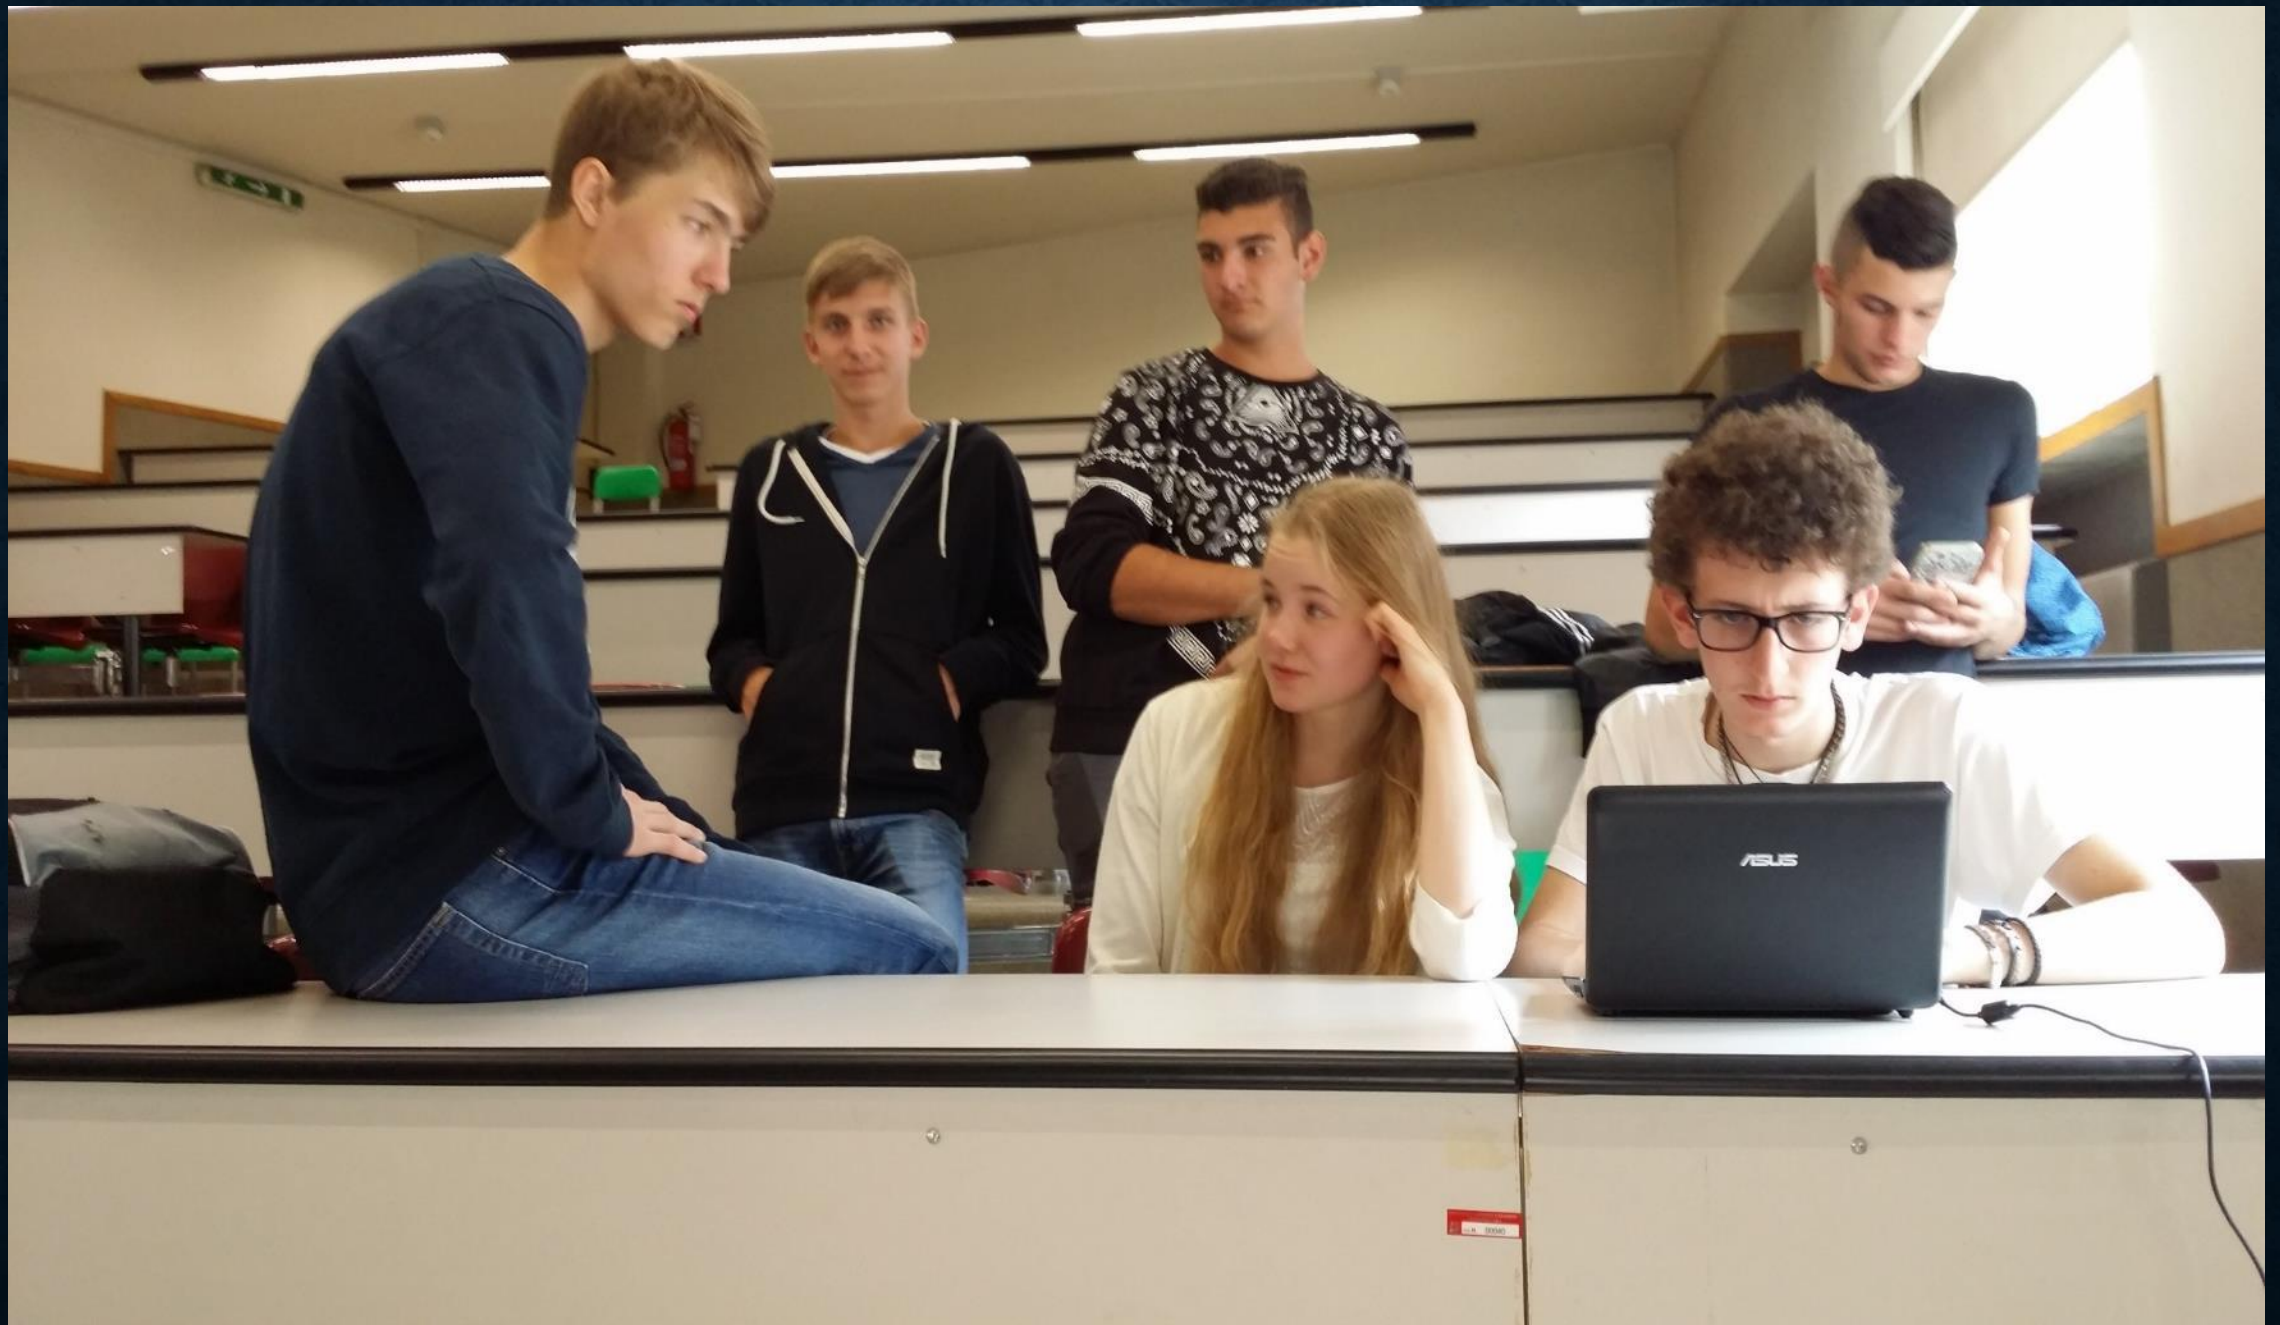



# Students' presentations

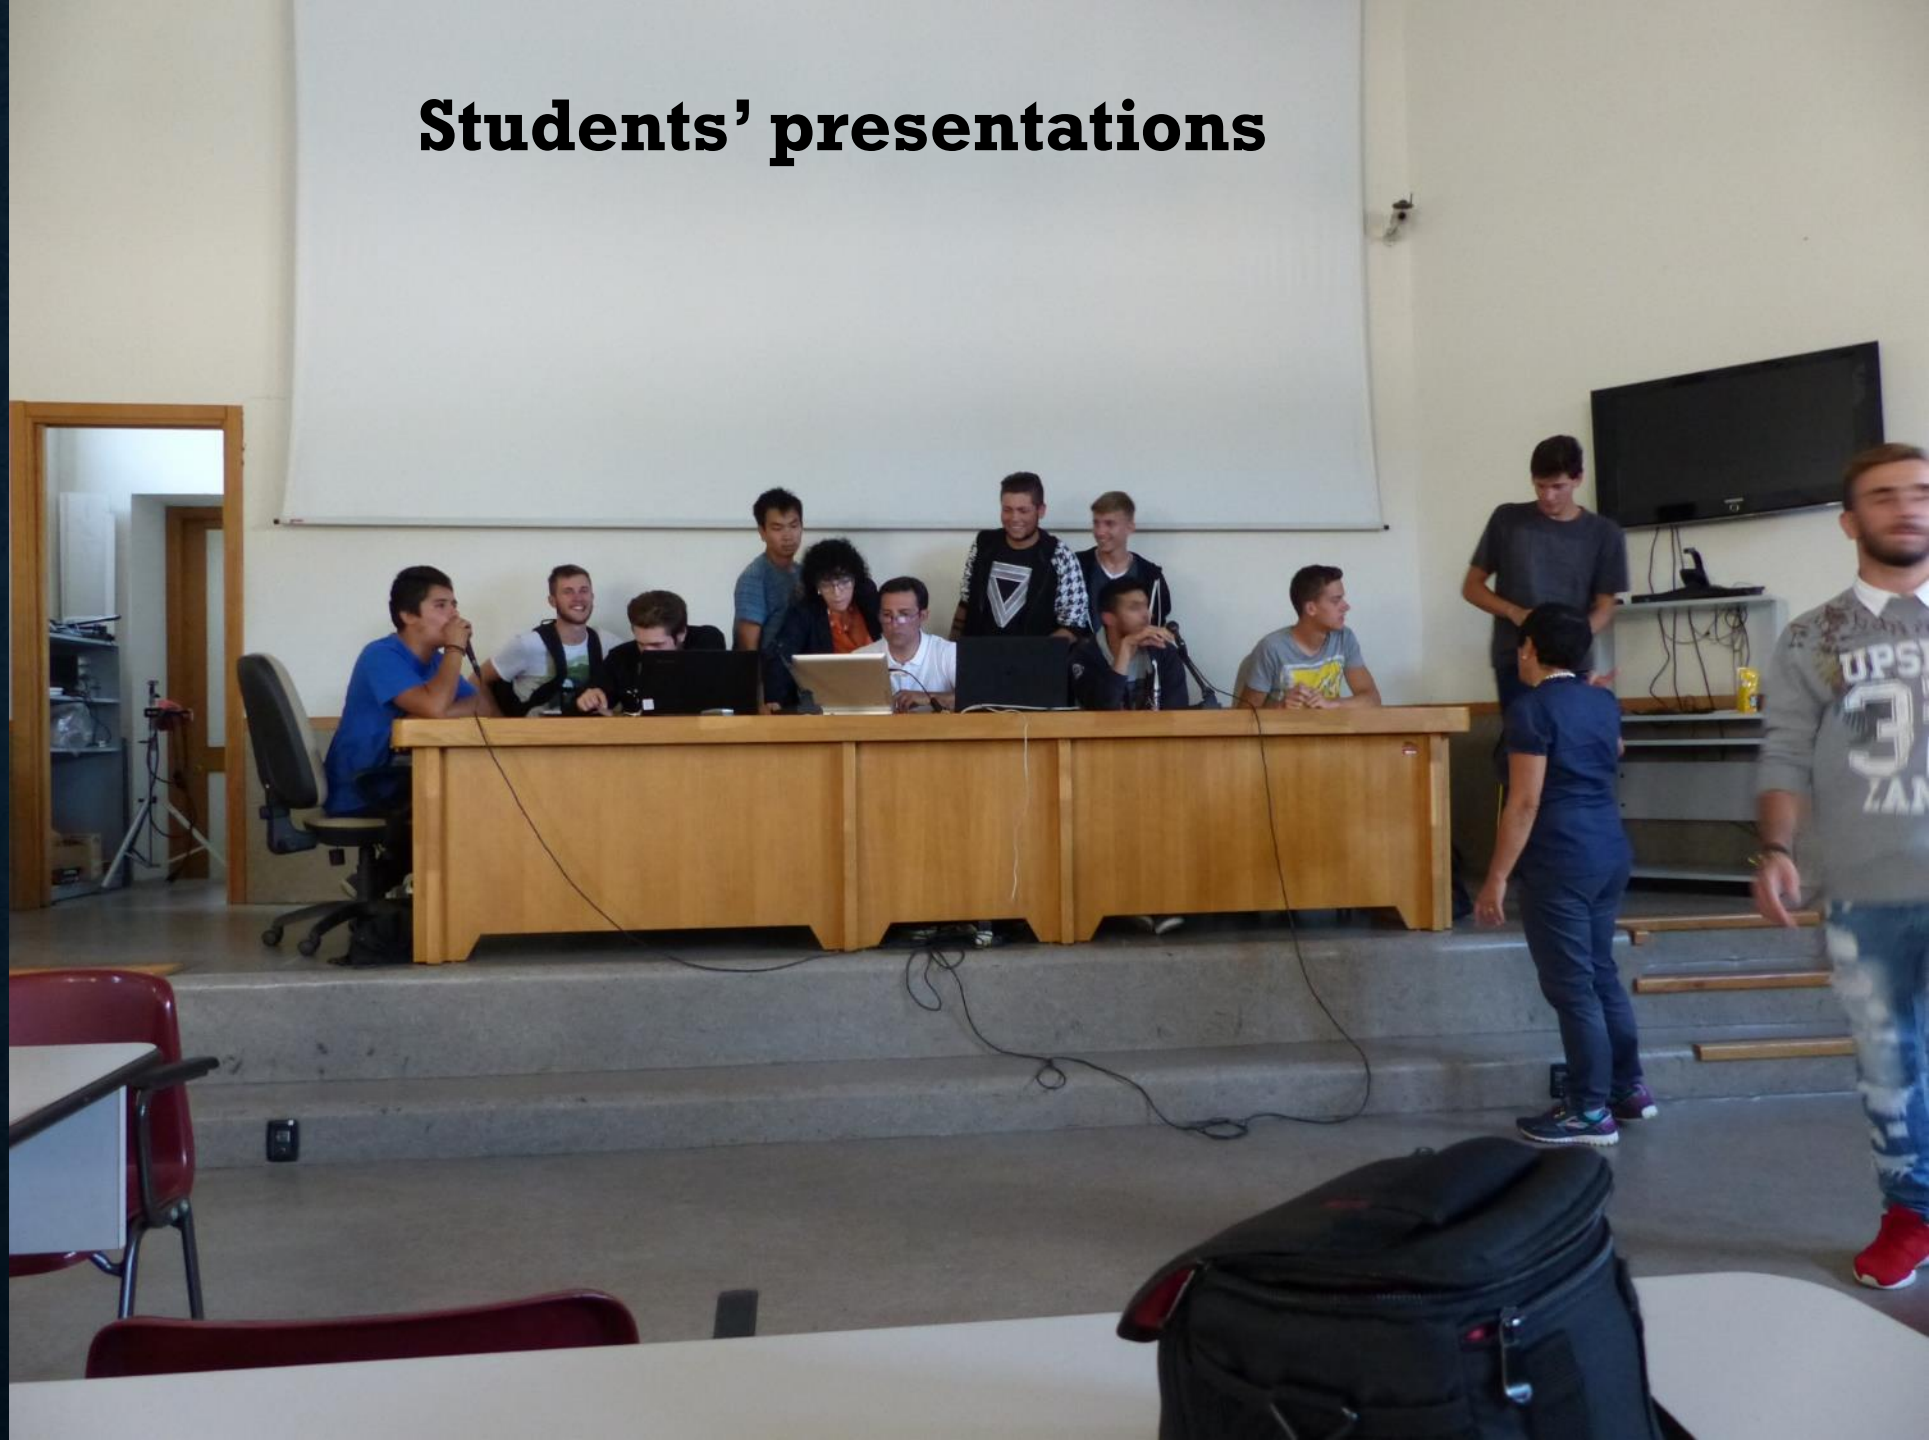



Climate strongly conditioned migrations of Walser population in the first millenium and in the middleage they colonized the high quota areas in our territories estabilishing an autonomous economy based on agriculture and breeding.

After the «small glaciation» (about 1500 a.C. ) climate didn't allow to do Walser activities and gradually brought to another migration flow to foreign countries with the consequent abandonment of some alps and villages.

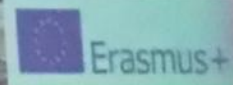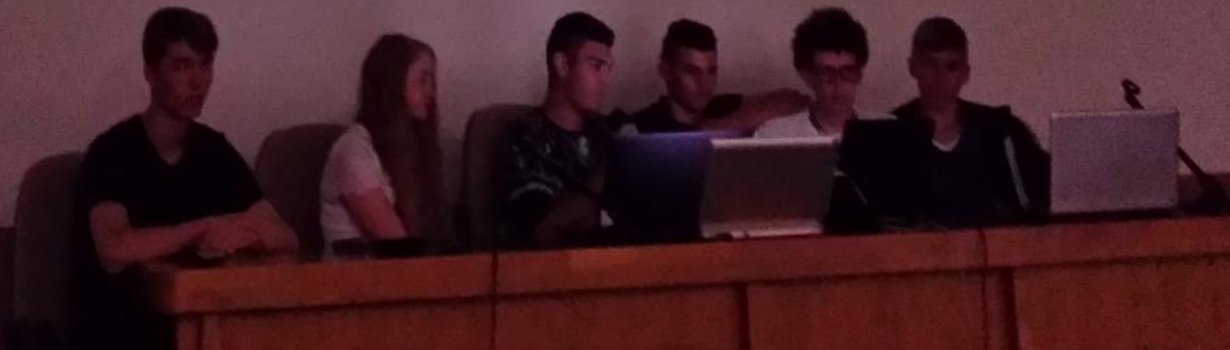



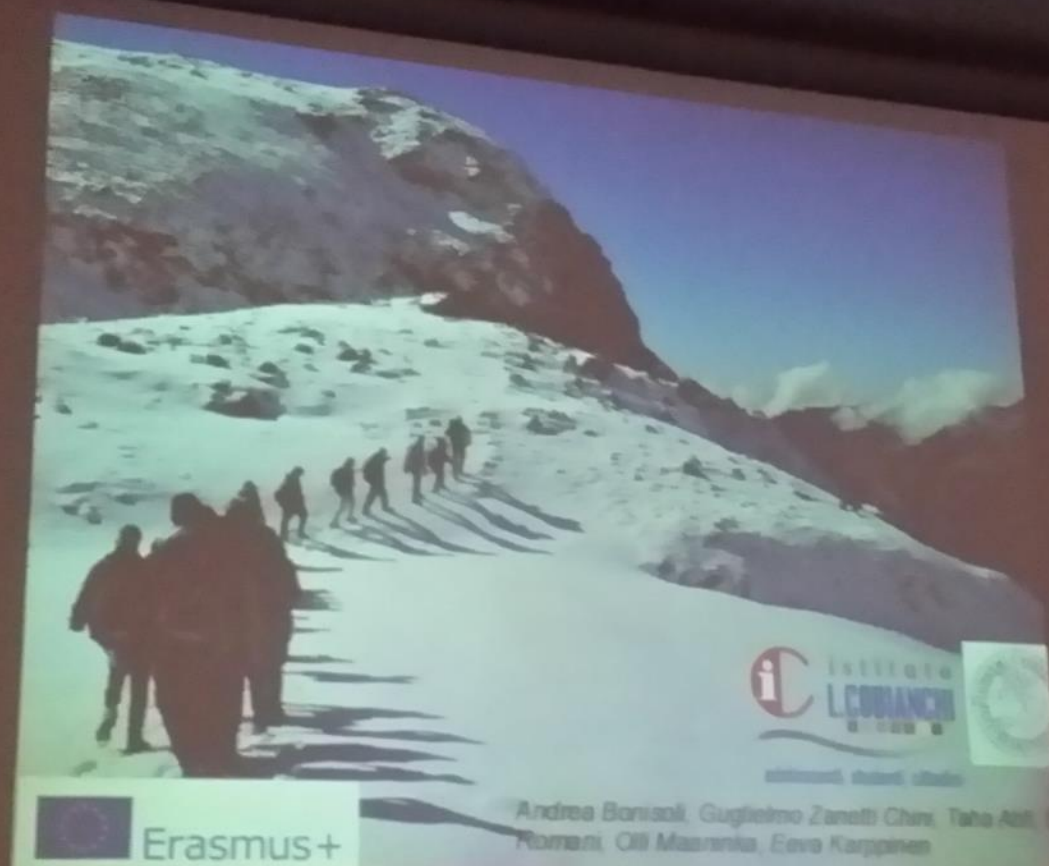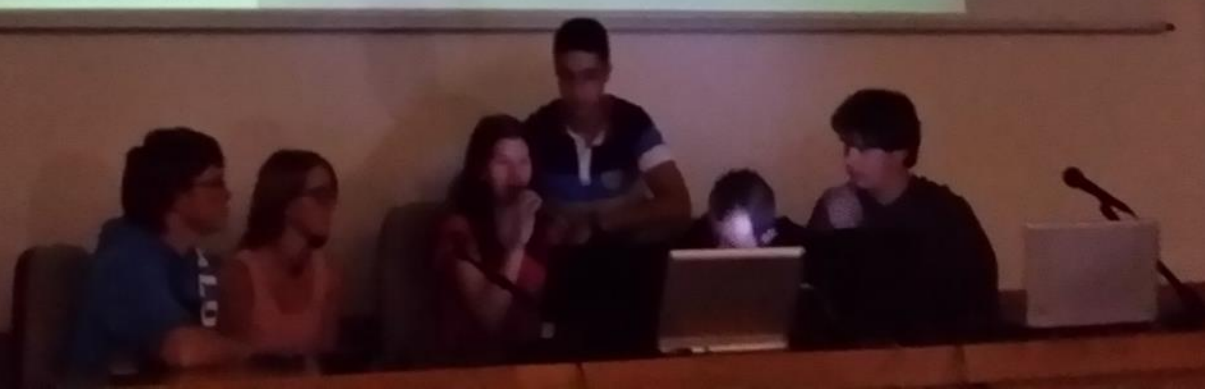



**The farewell party on Friday evening at school.  
Greetings from the school authorities and the  
principal.**

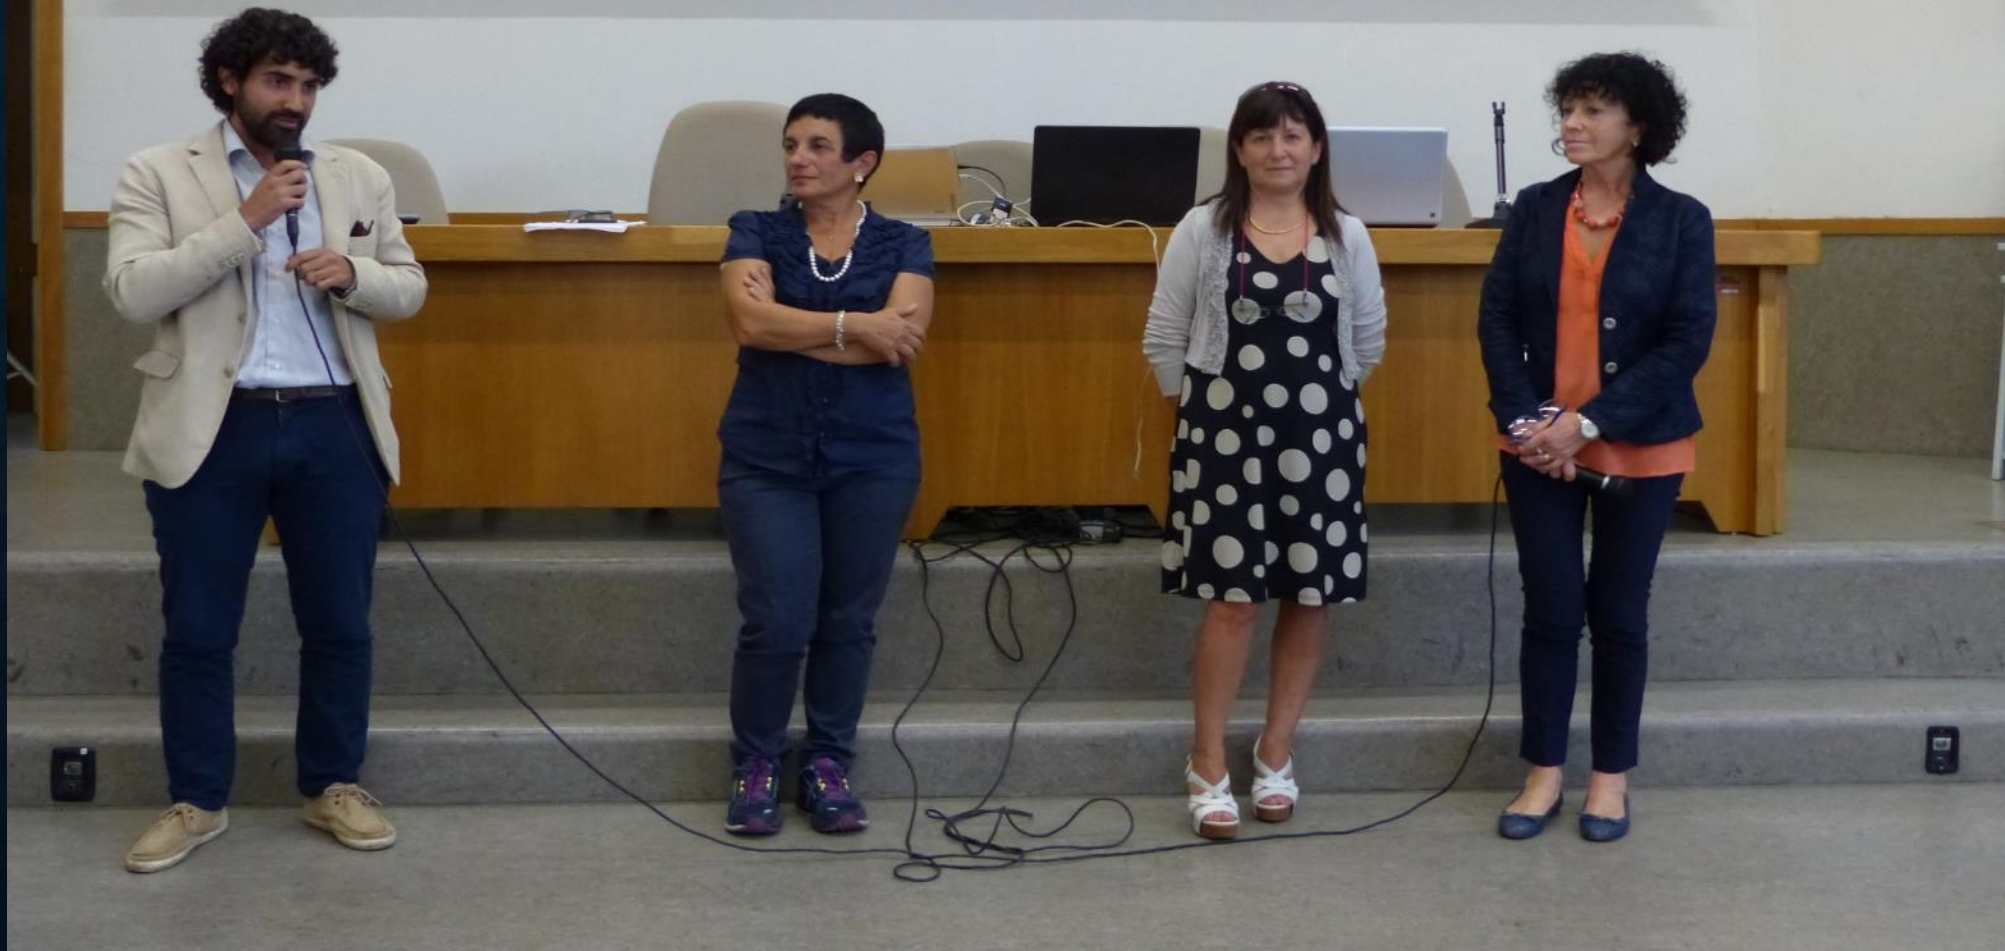



# The whole Erasmus+-team of the teachers

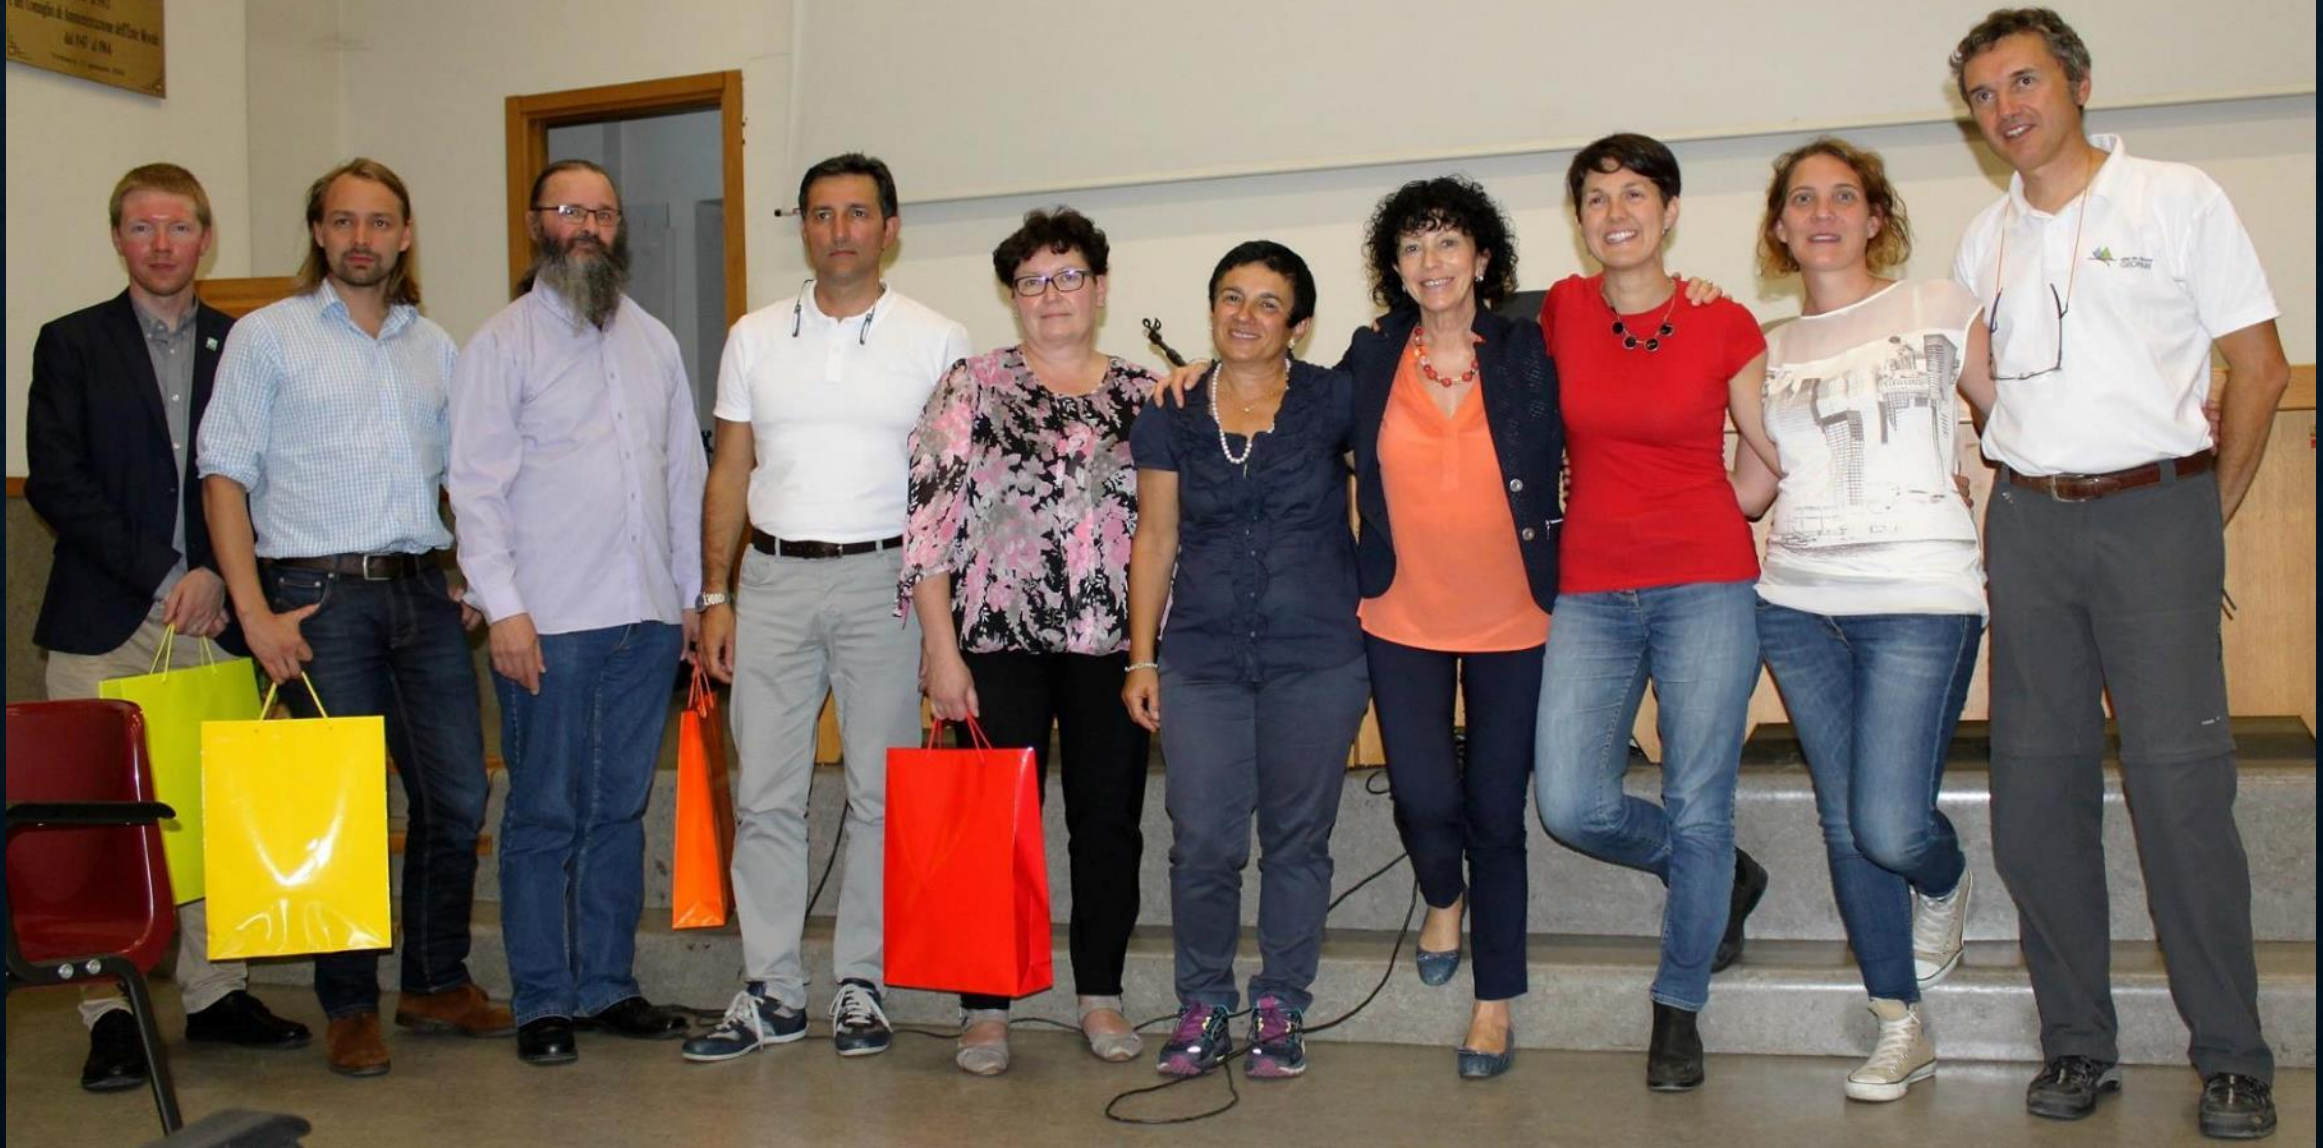



## **The teachers' official dinner**

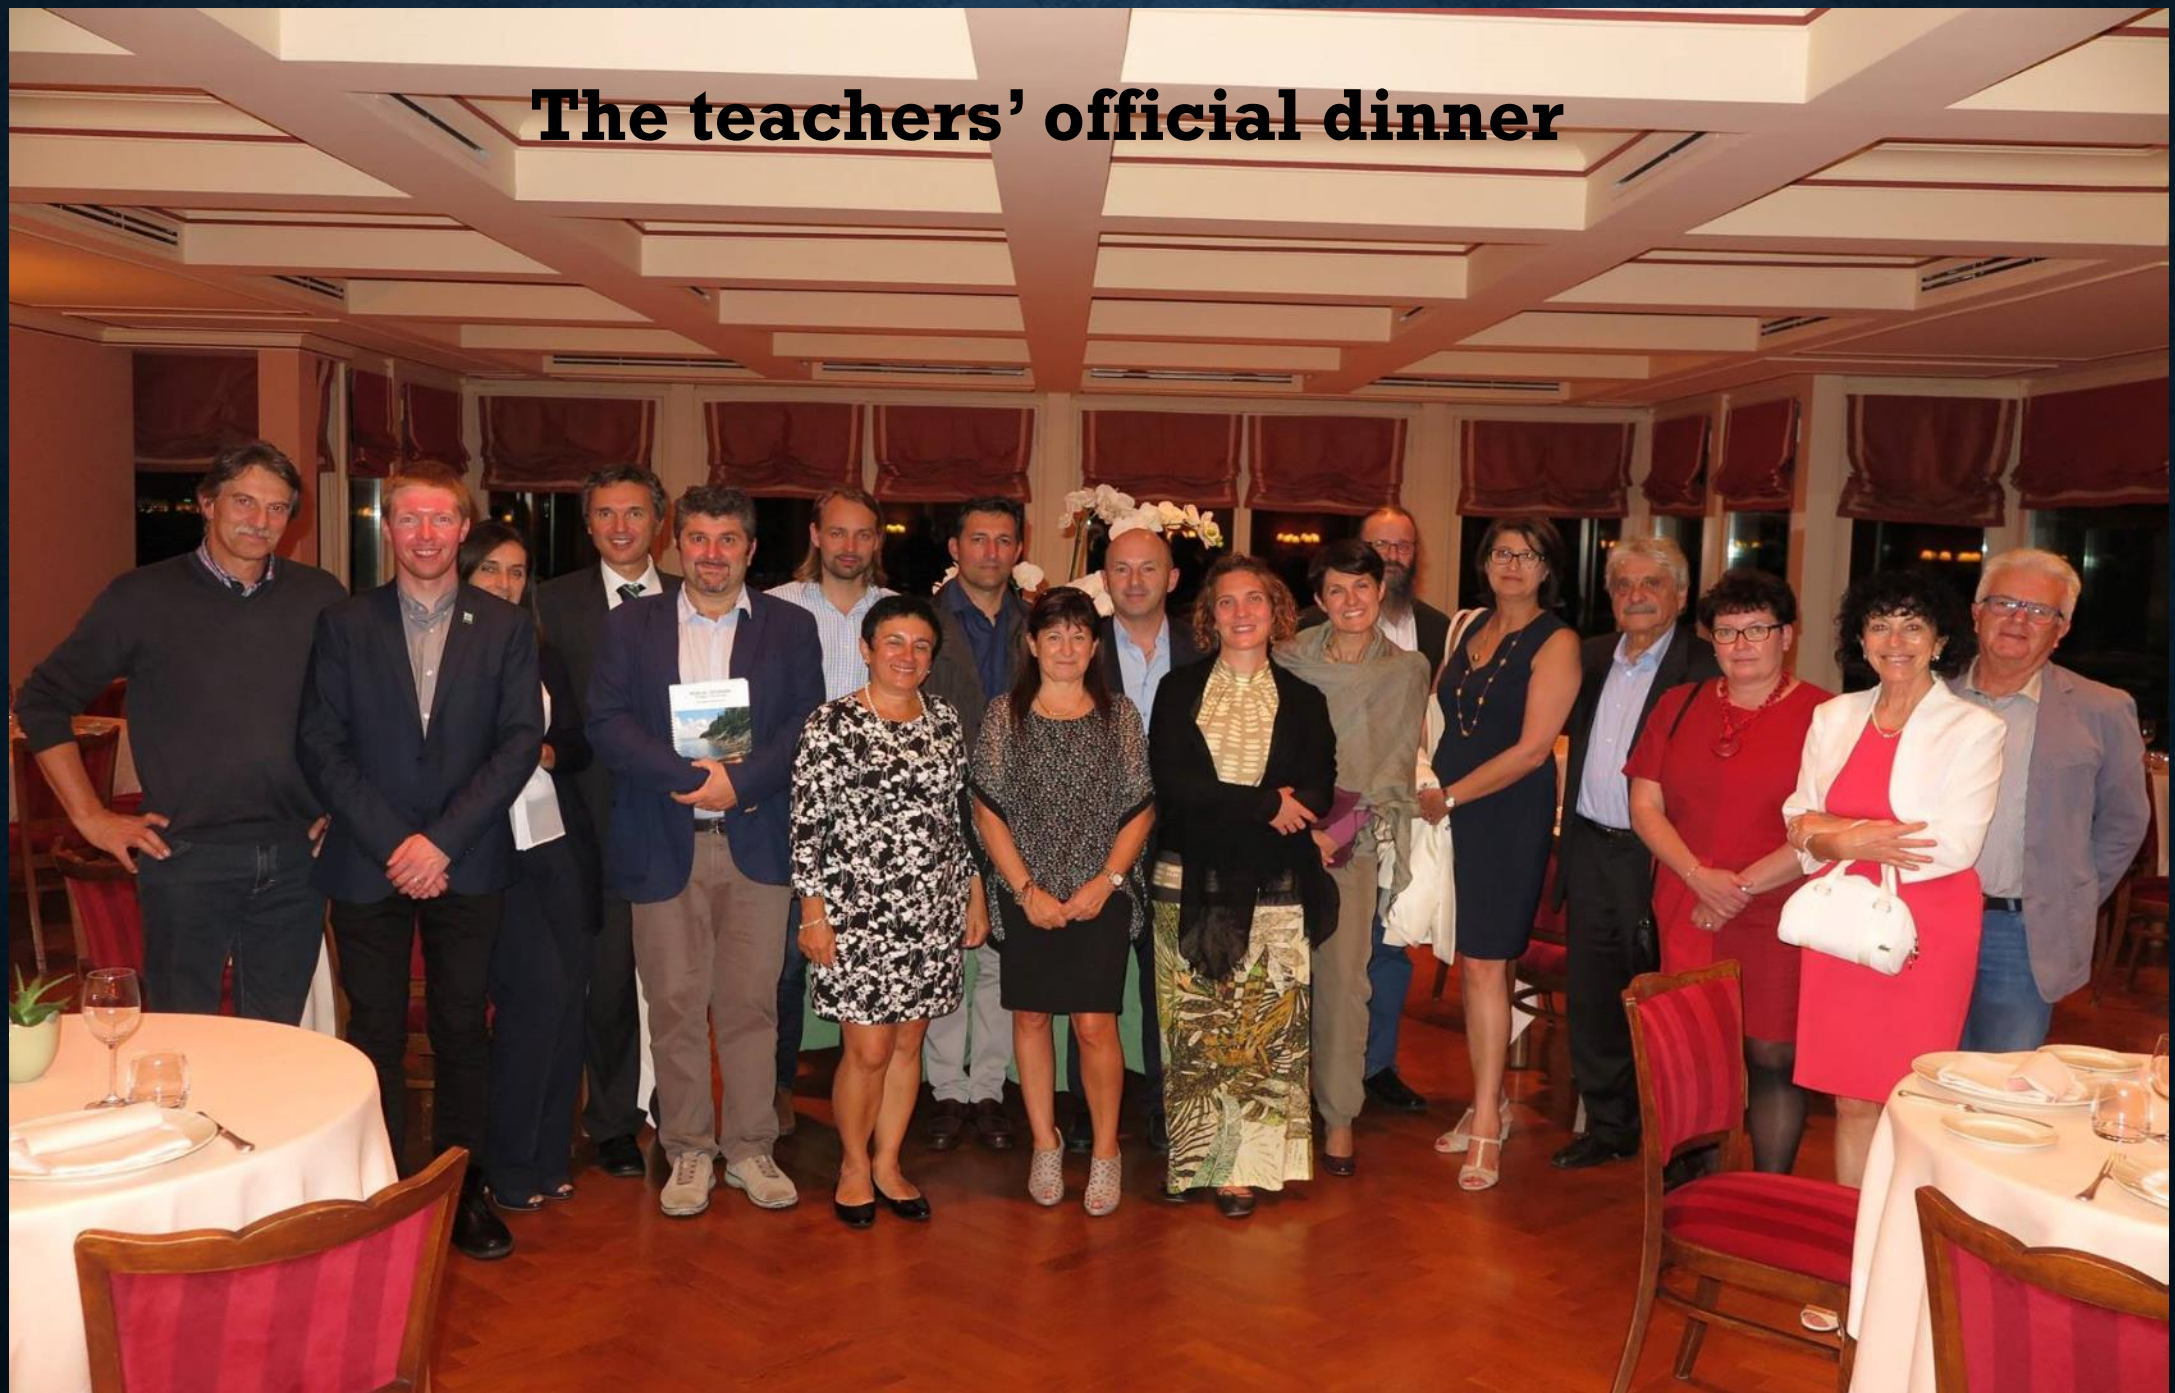



**See you in Vaala in May 2017.**

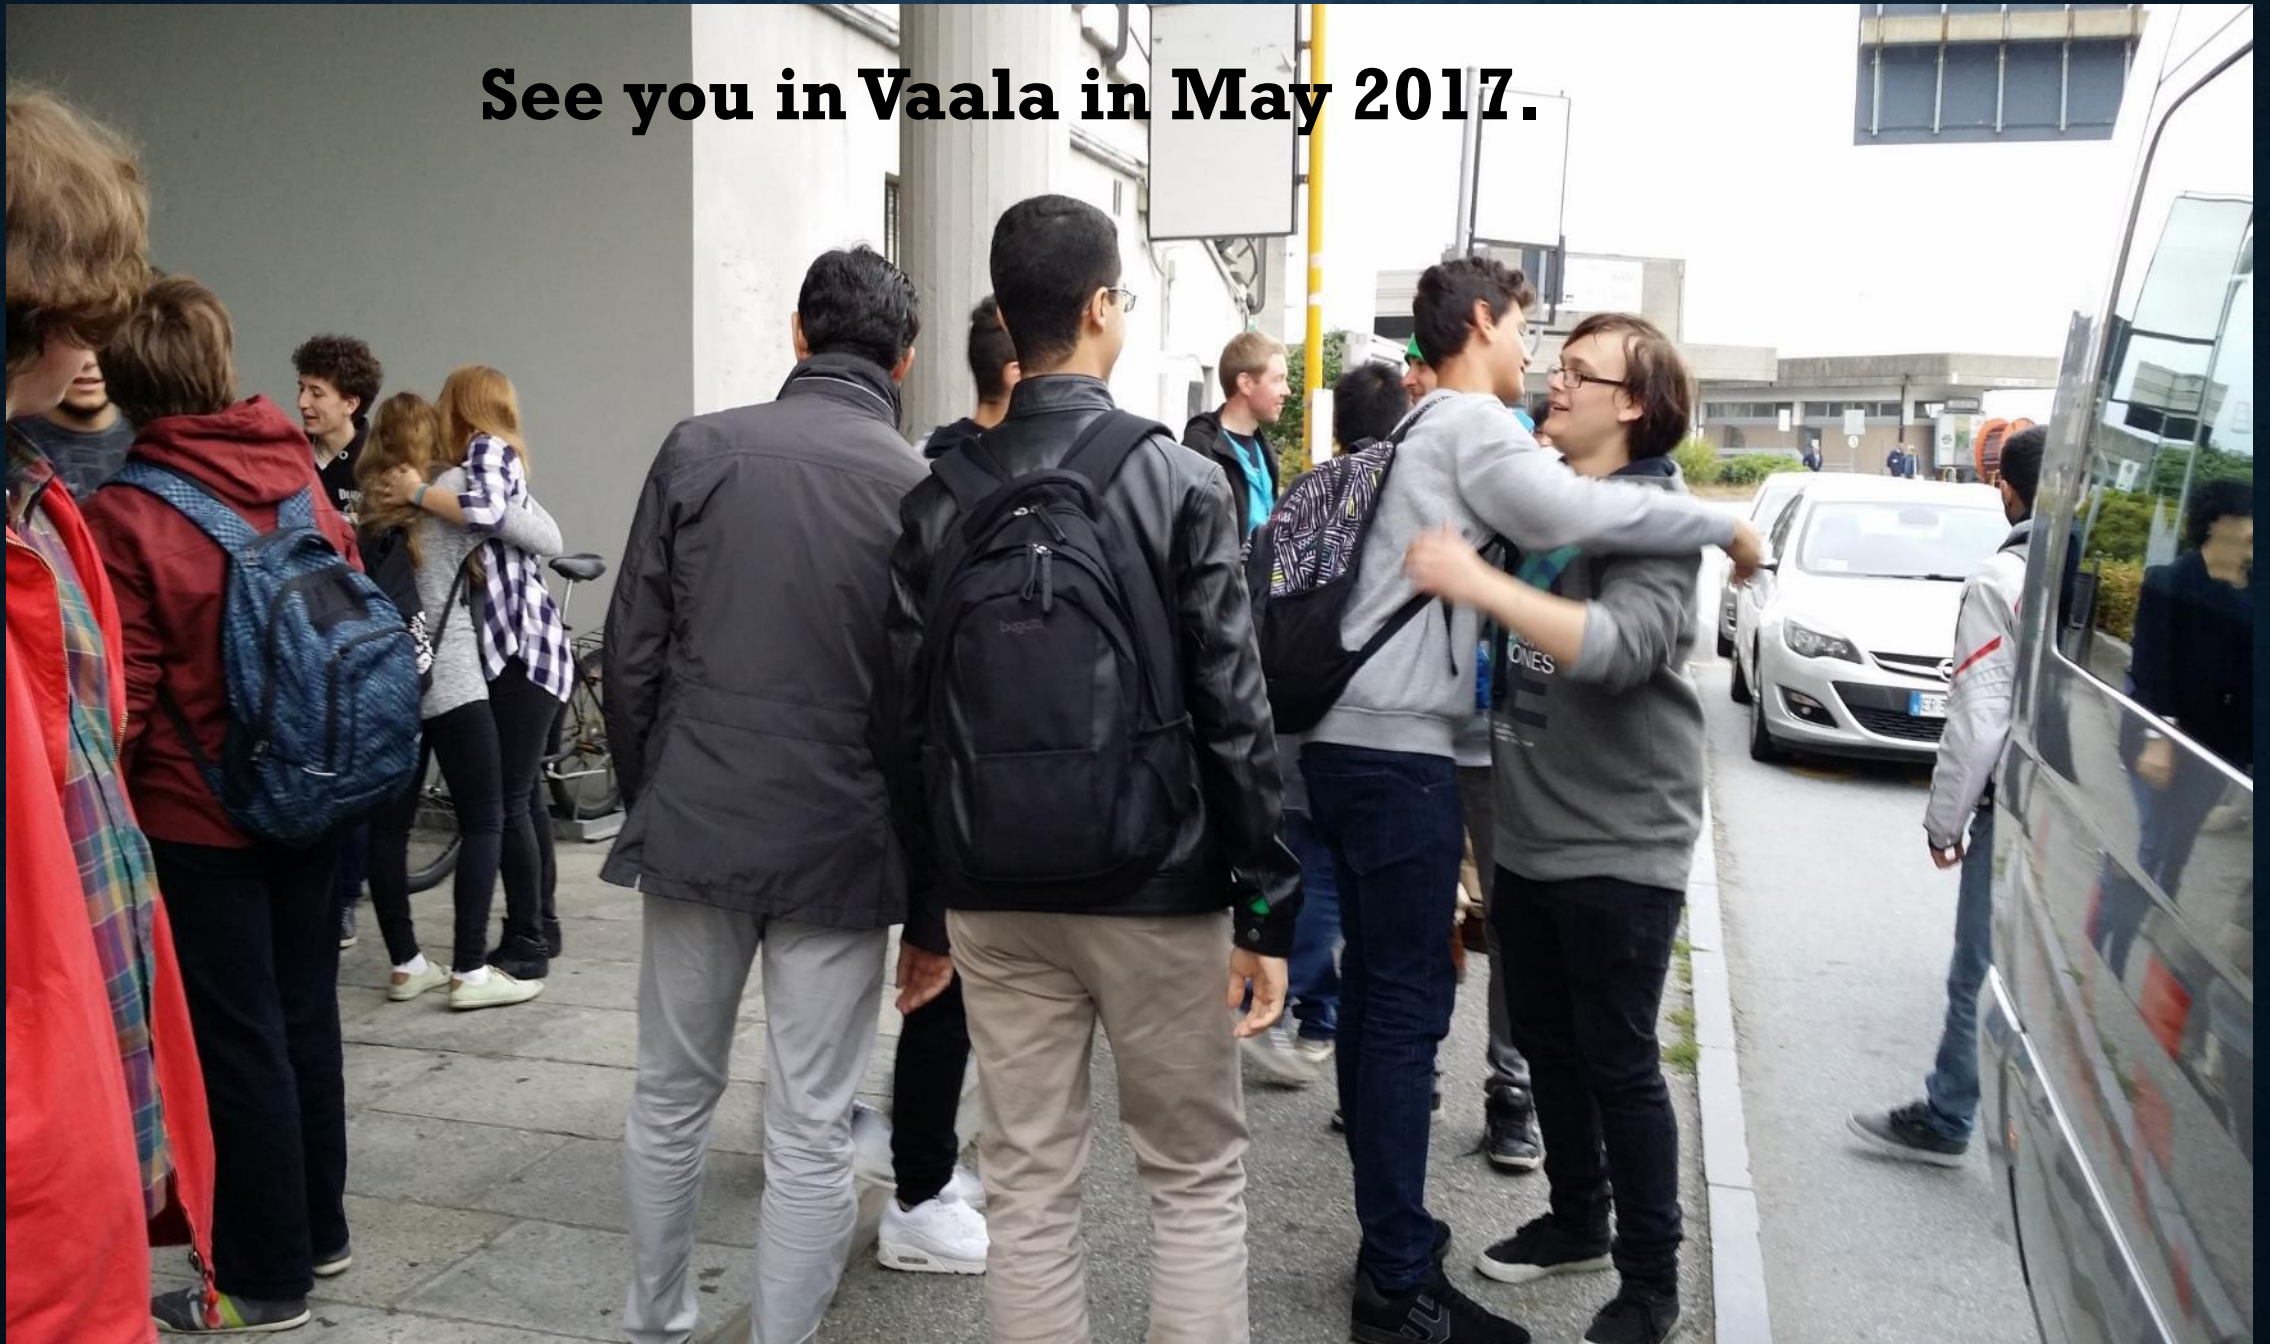



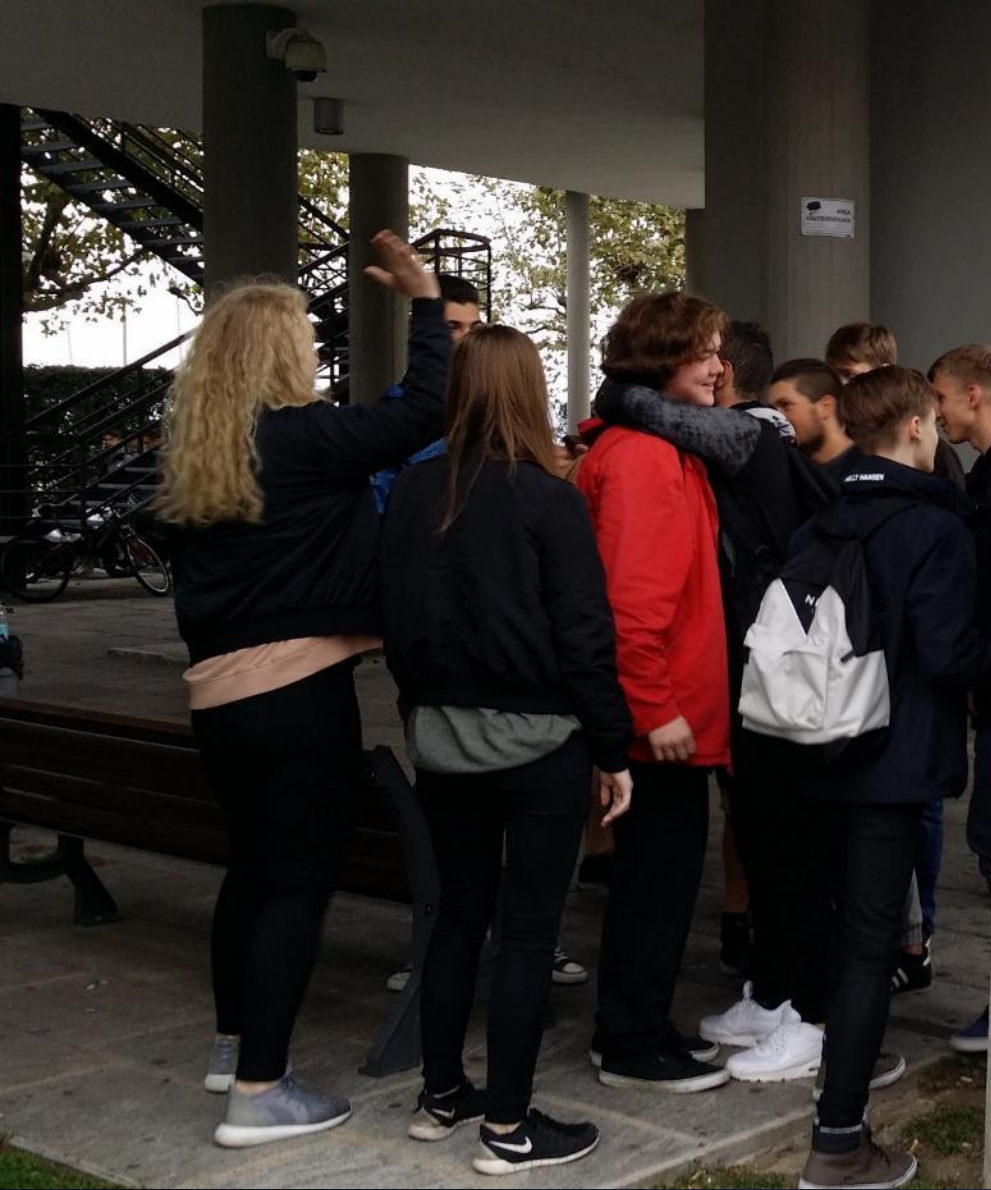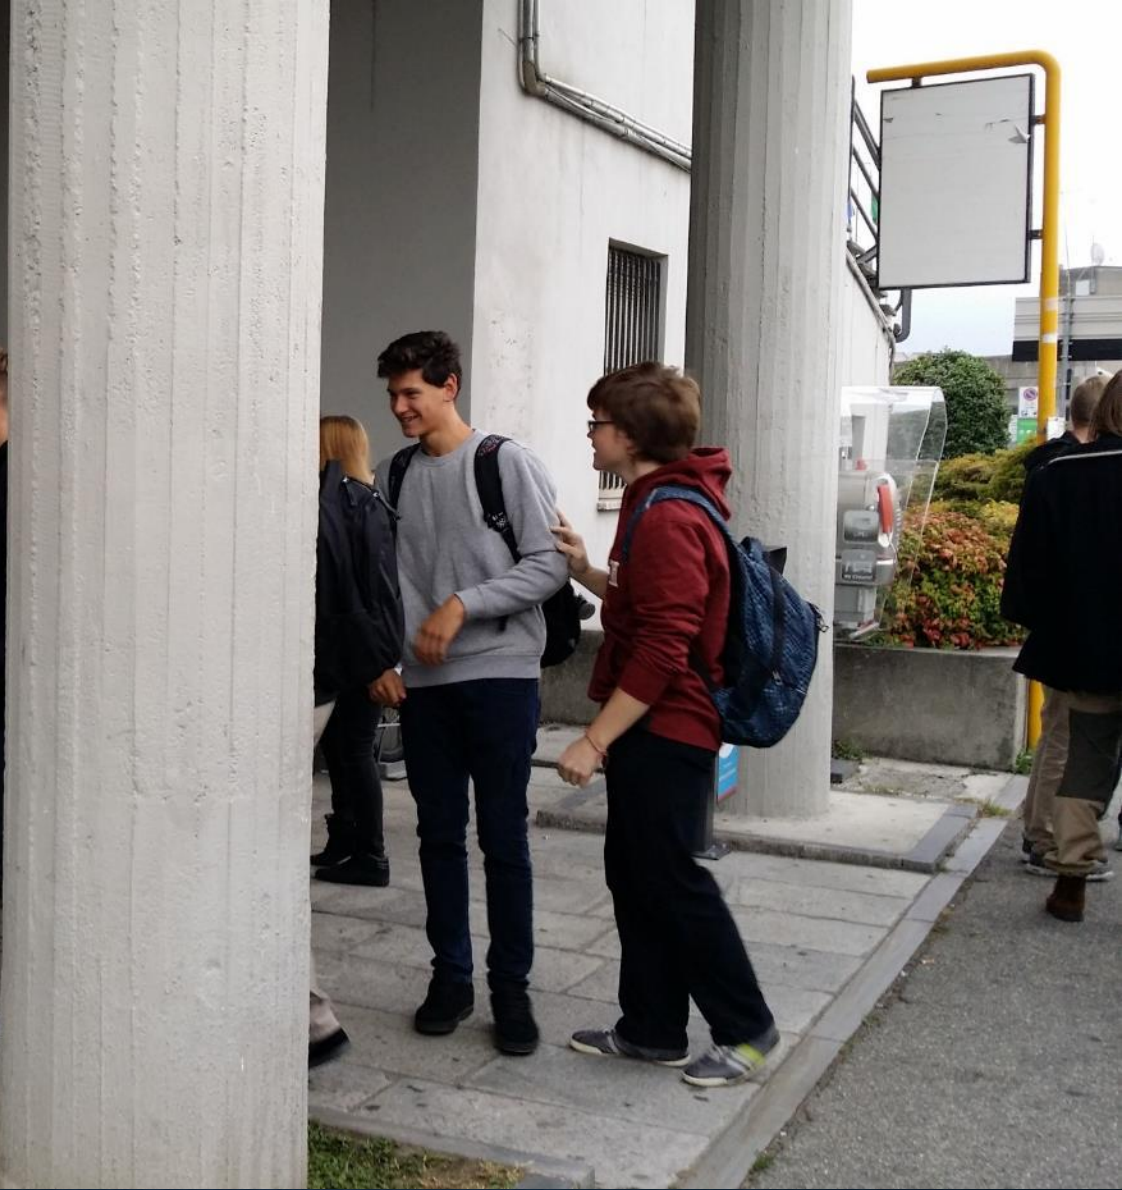



# Photos

Vaalan lukio

Jouni Kauhanen

Riitta Olsbo

Jani Raitanen



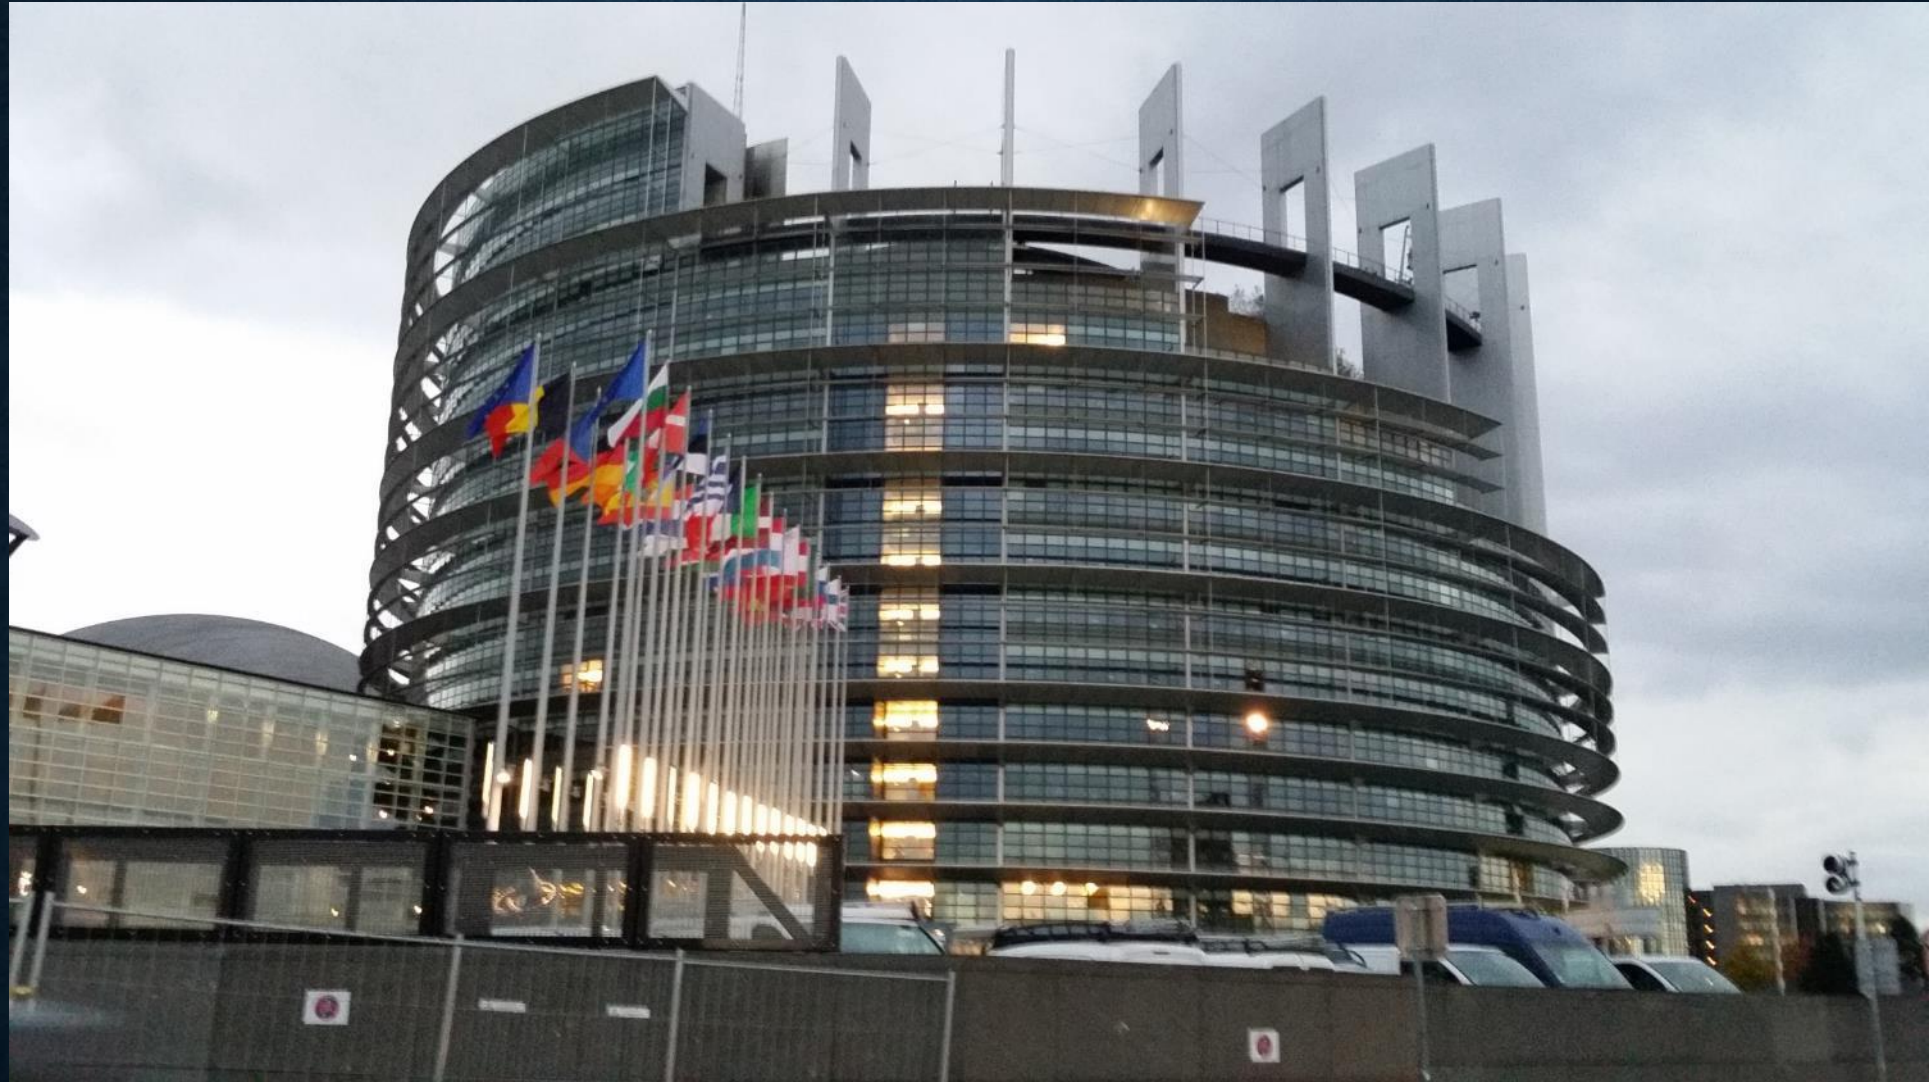

**Vaalan lukiolaisia Euroscola-matkalla  
Strasbourgissa 11.10.-13.10.2017**



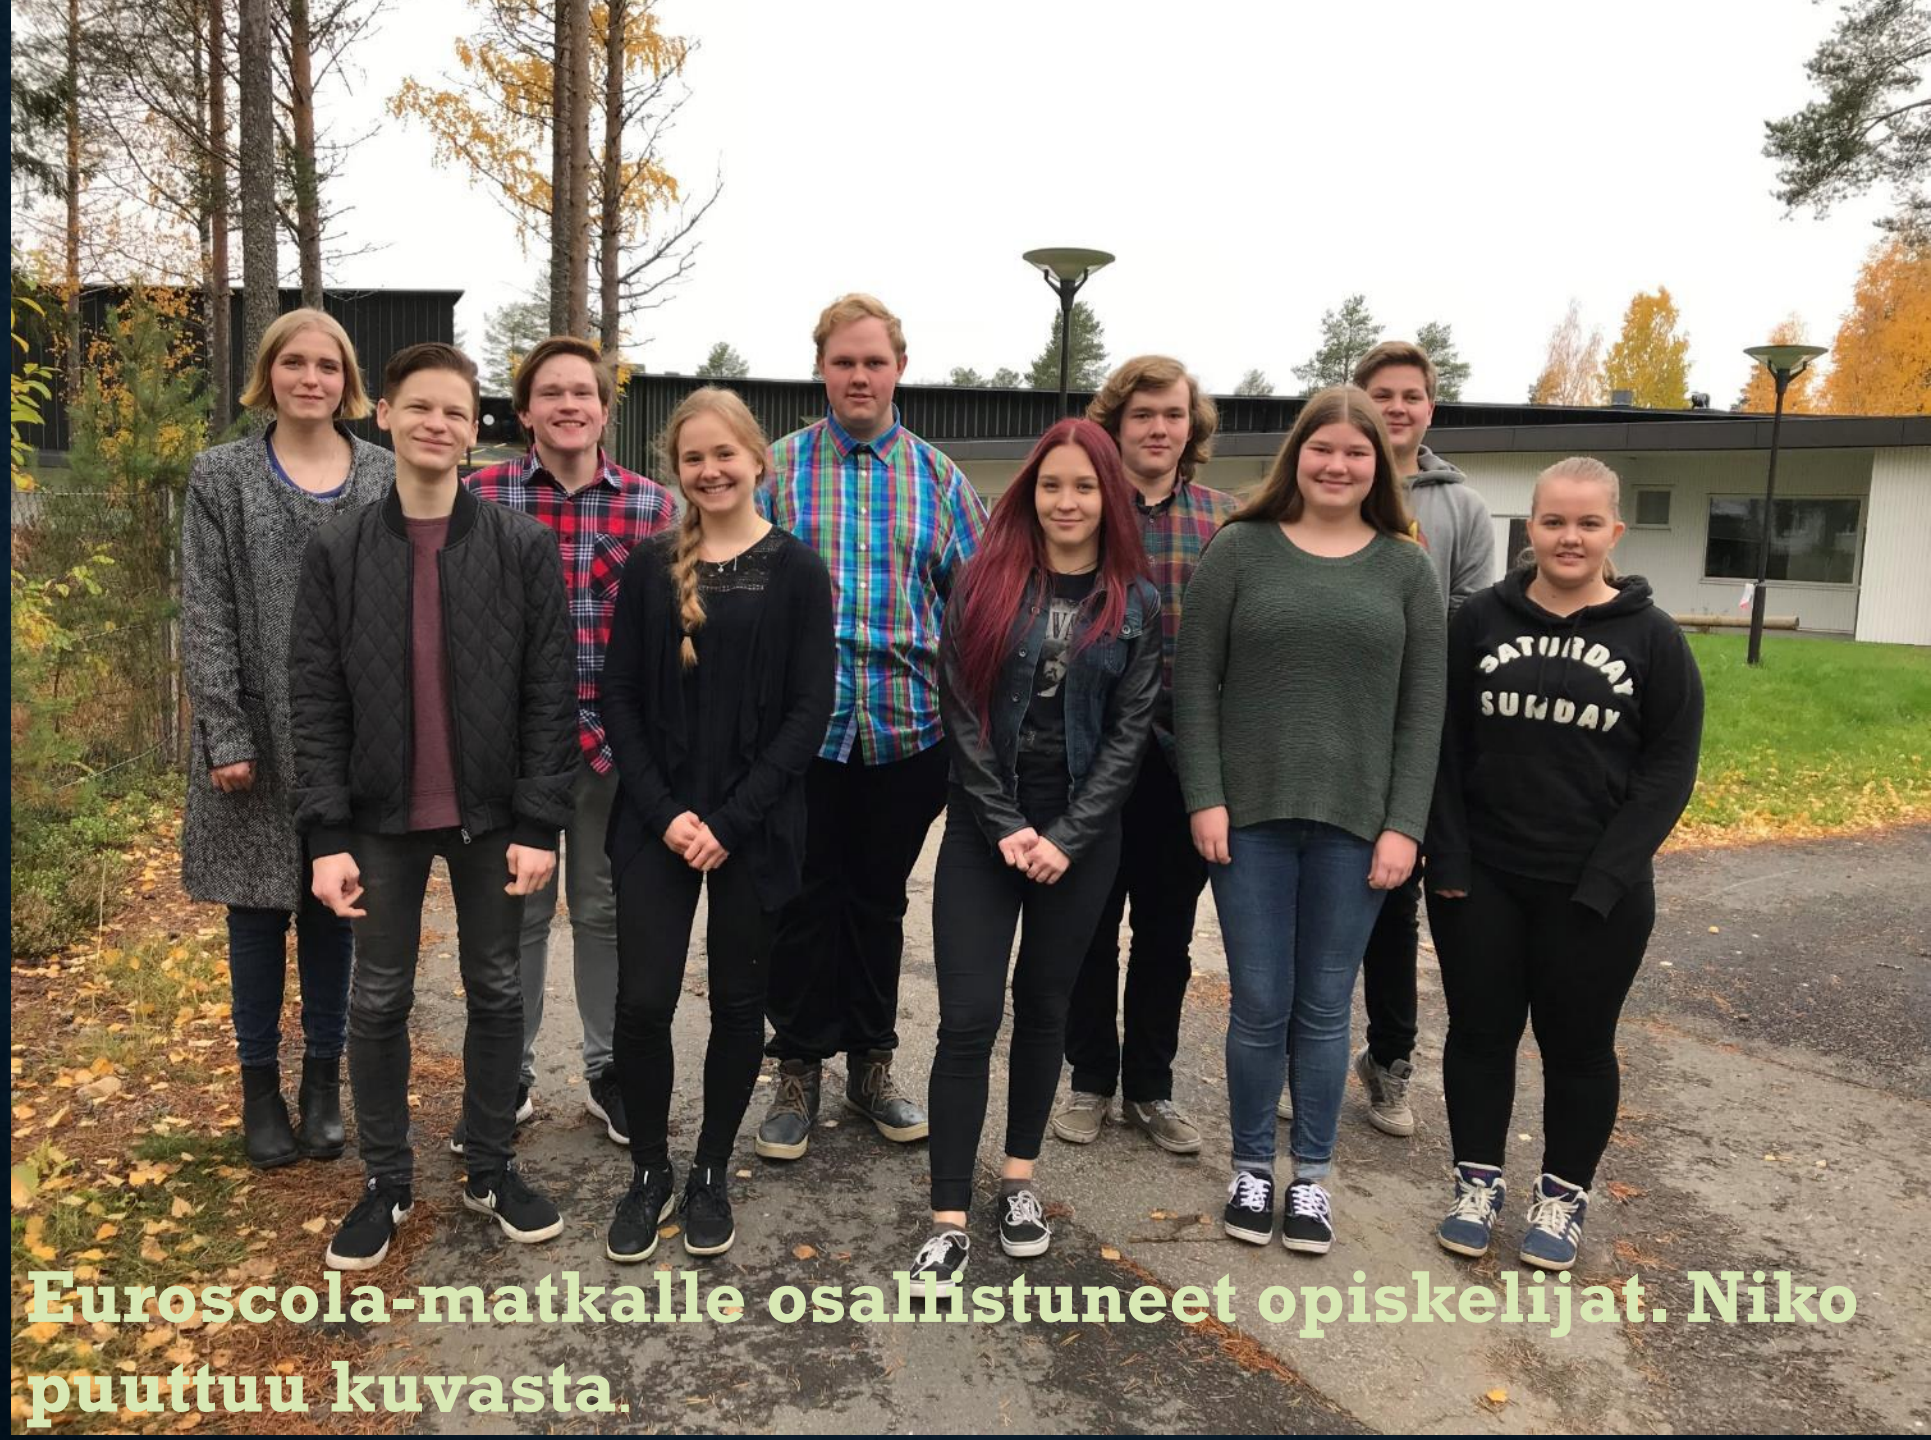

**Euroscola-matkalle osallistuneet opiskelijat. Niko puuttuu kuvasta.**



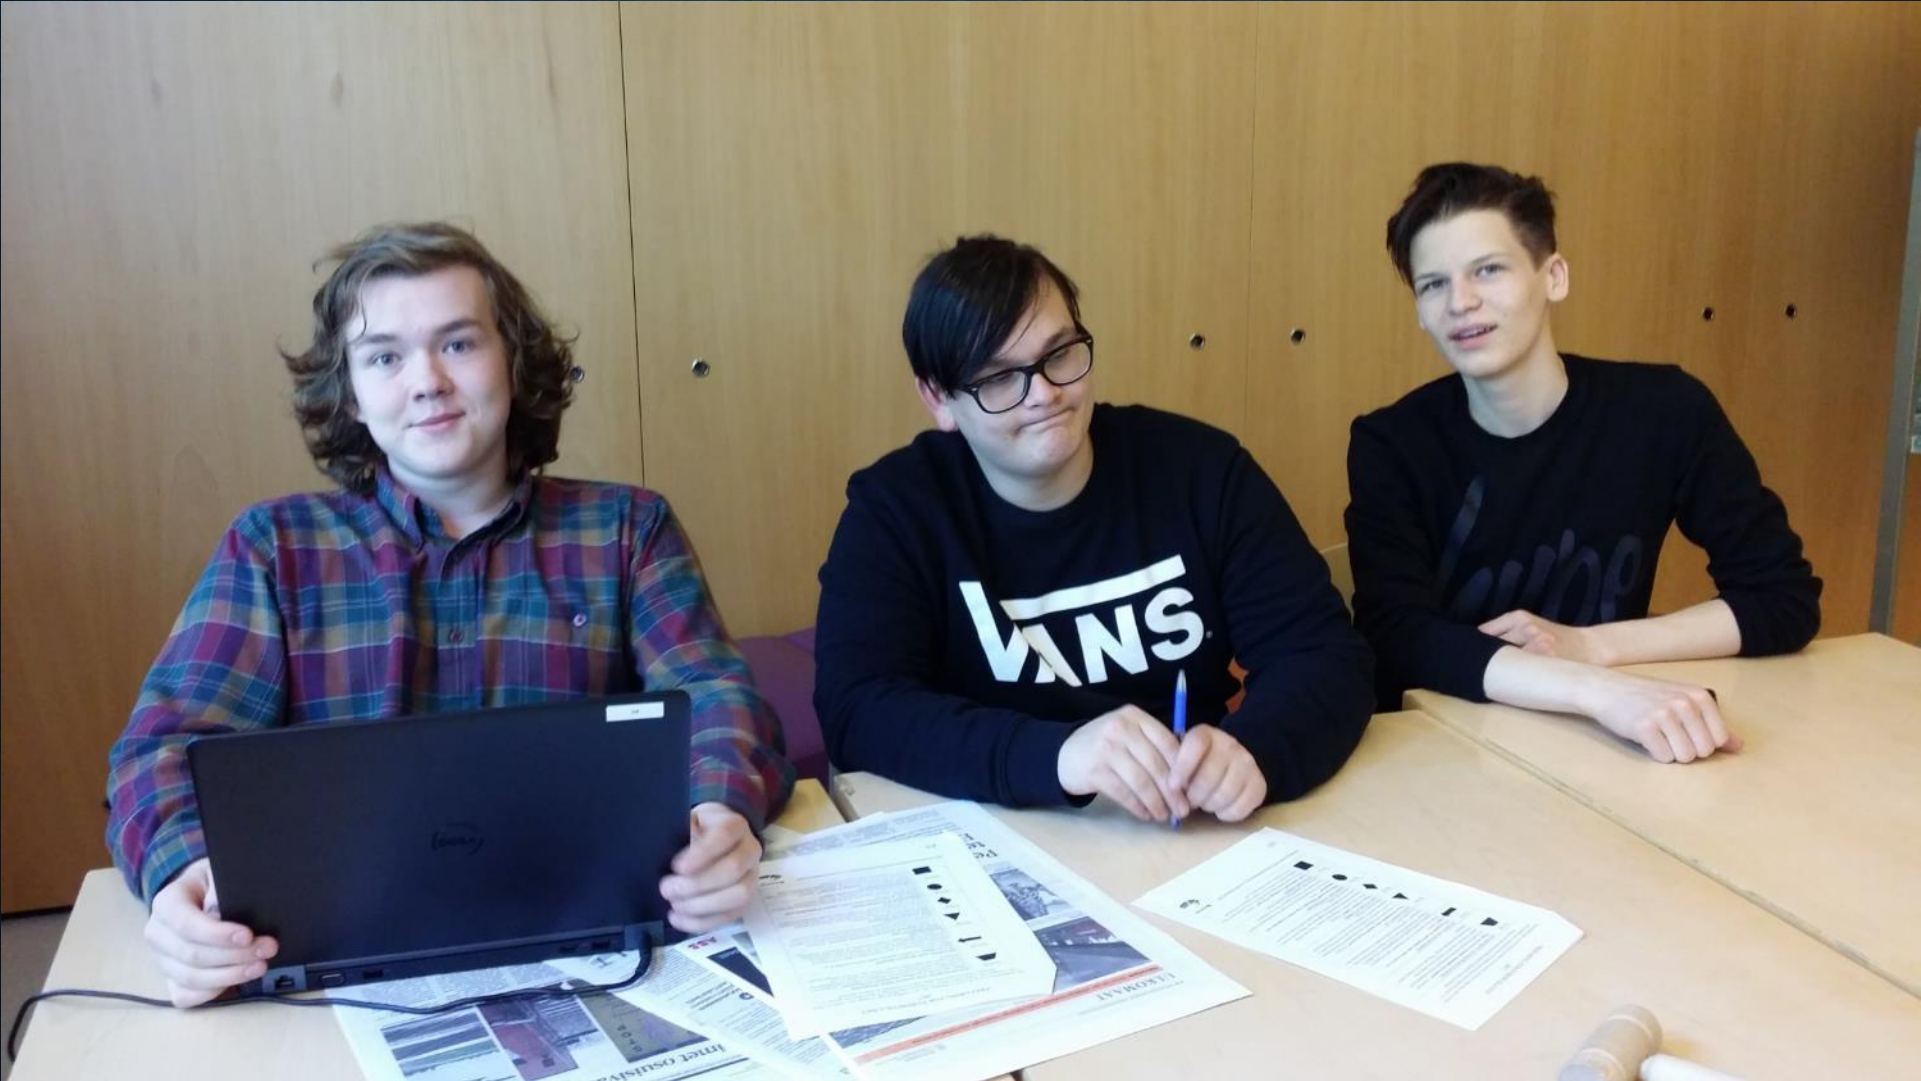

**Syksyn aikana valmistauduttiin Euroscola-päivään**



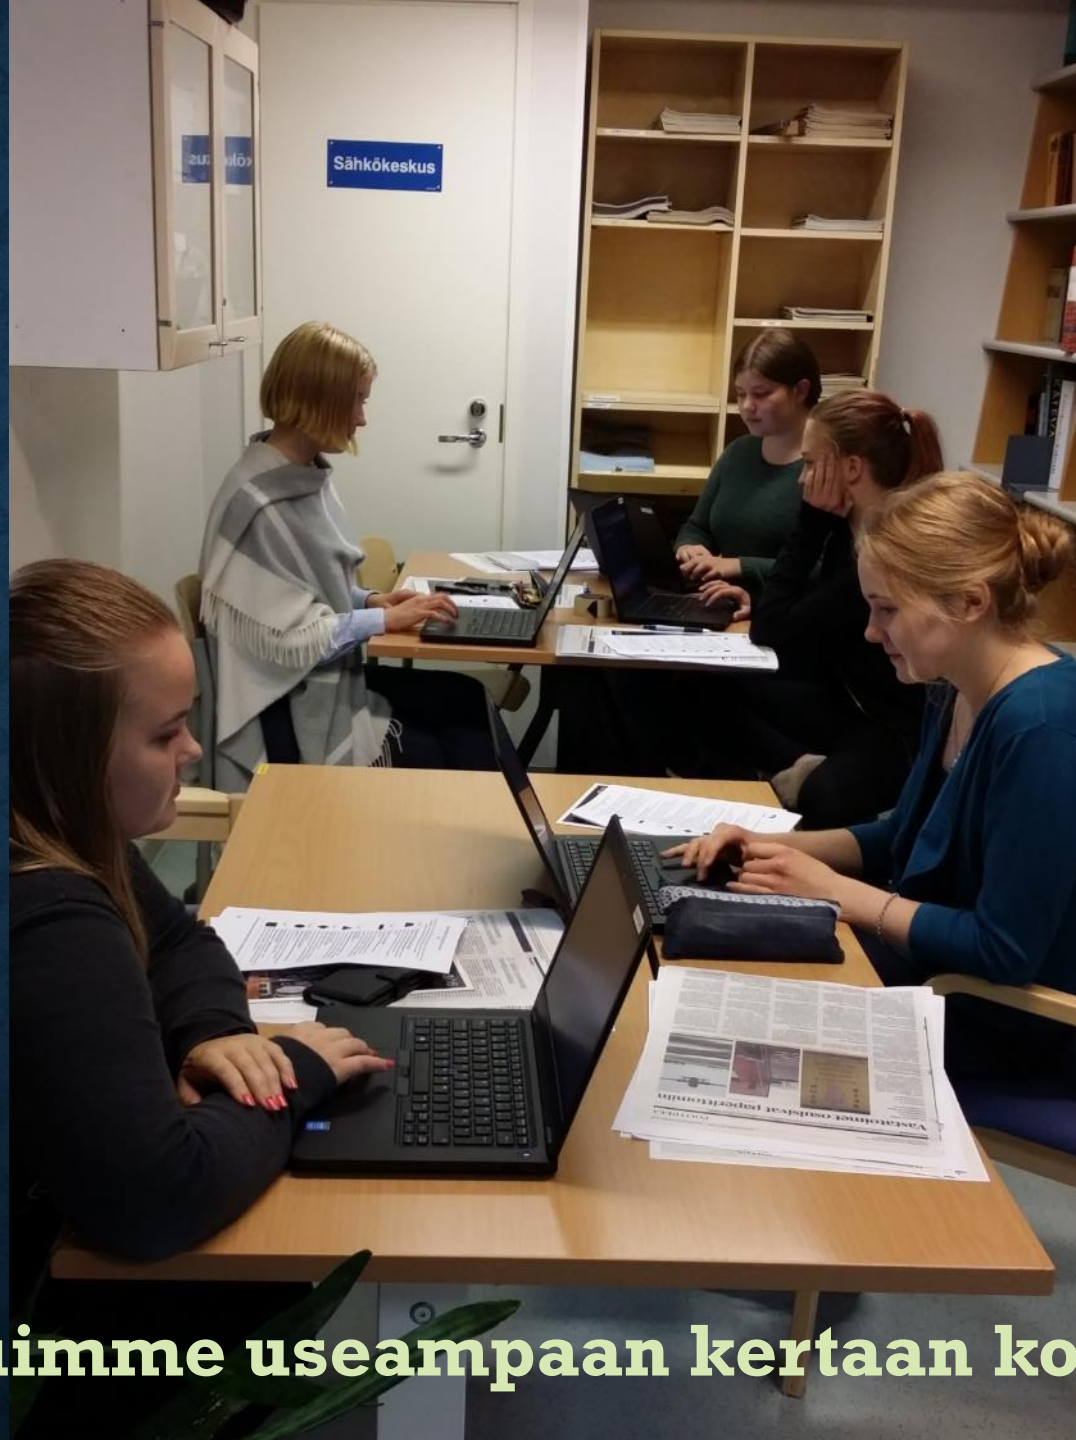

**Kokoonnuimme useampaan kertaan koulupäivän jälkeen**



## Frankfurtissa menomatkalla 11.10.2017

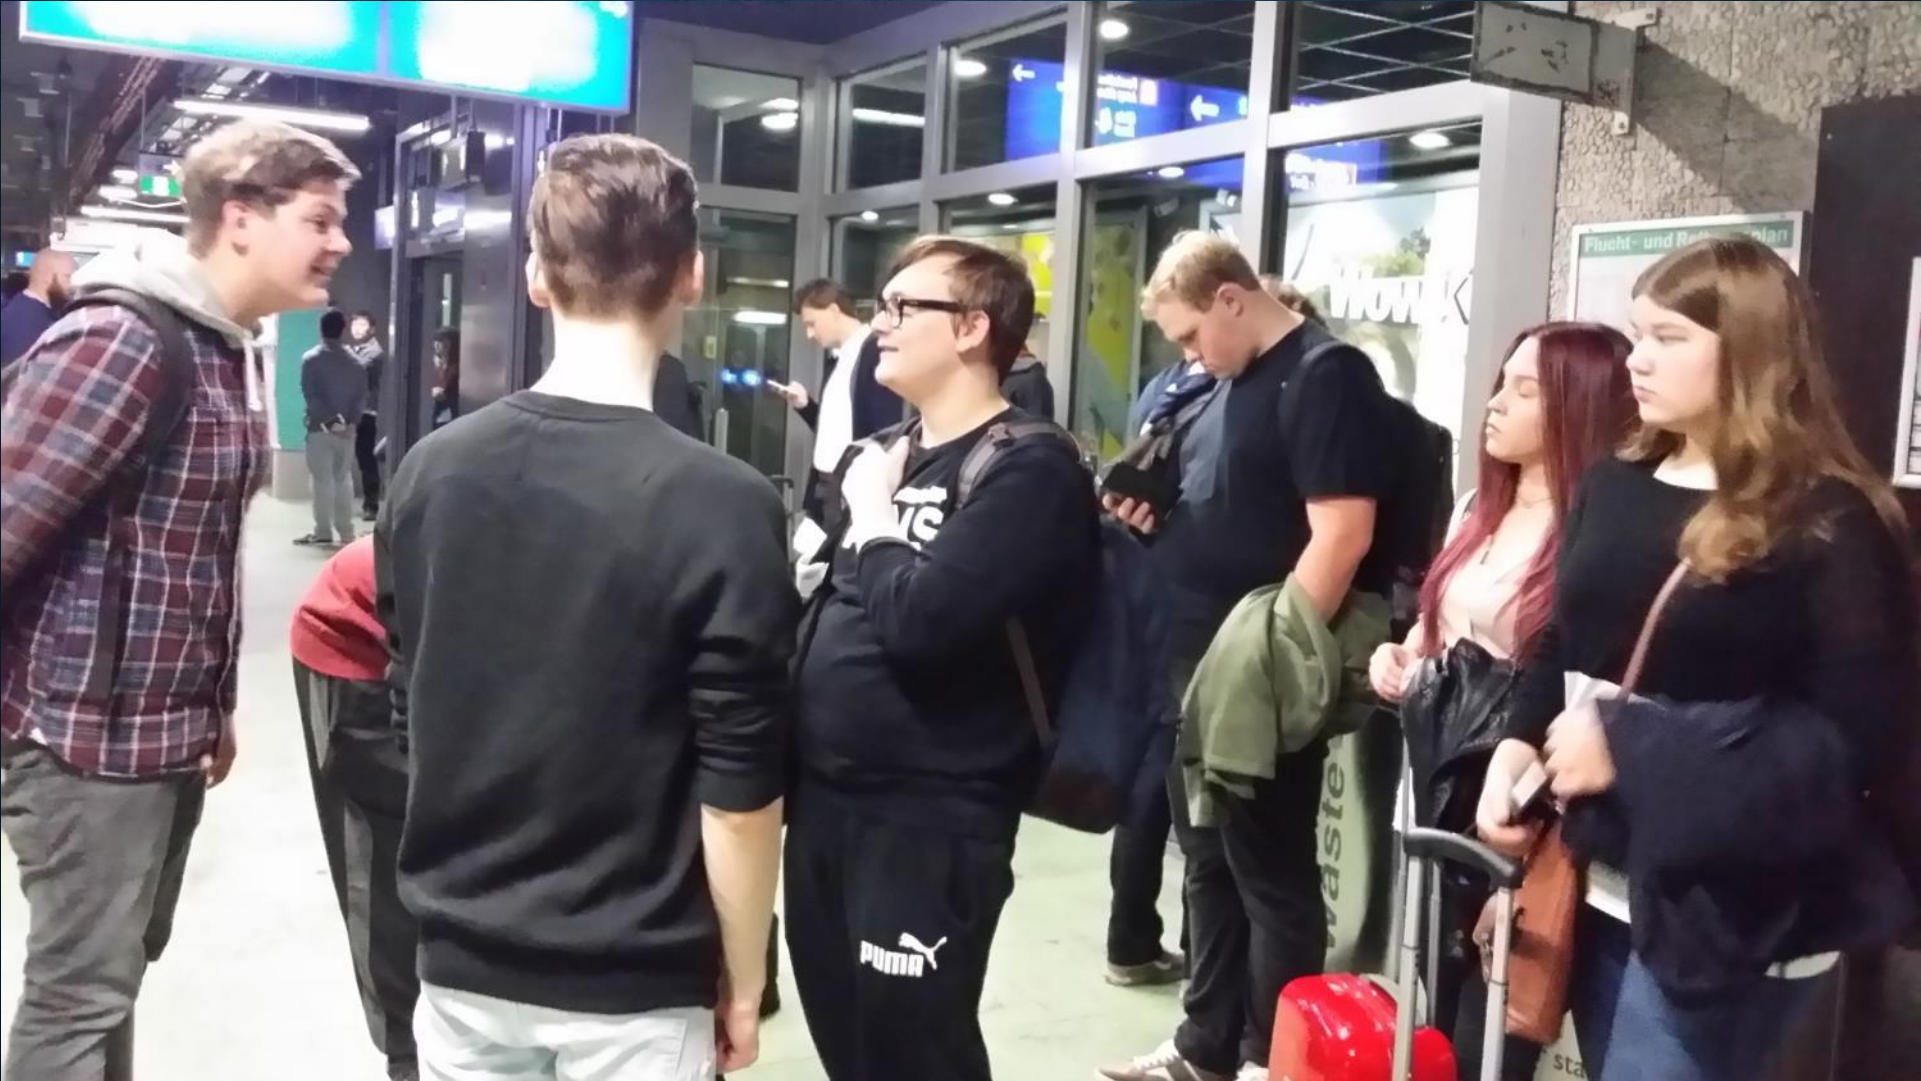

**Odottelomassa metrokyytiä kaupungin keskusta**



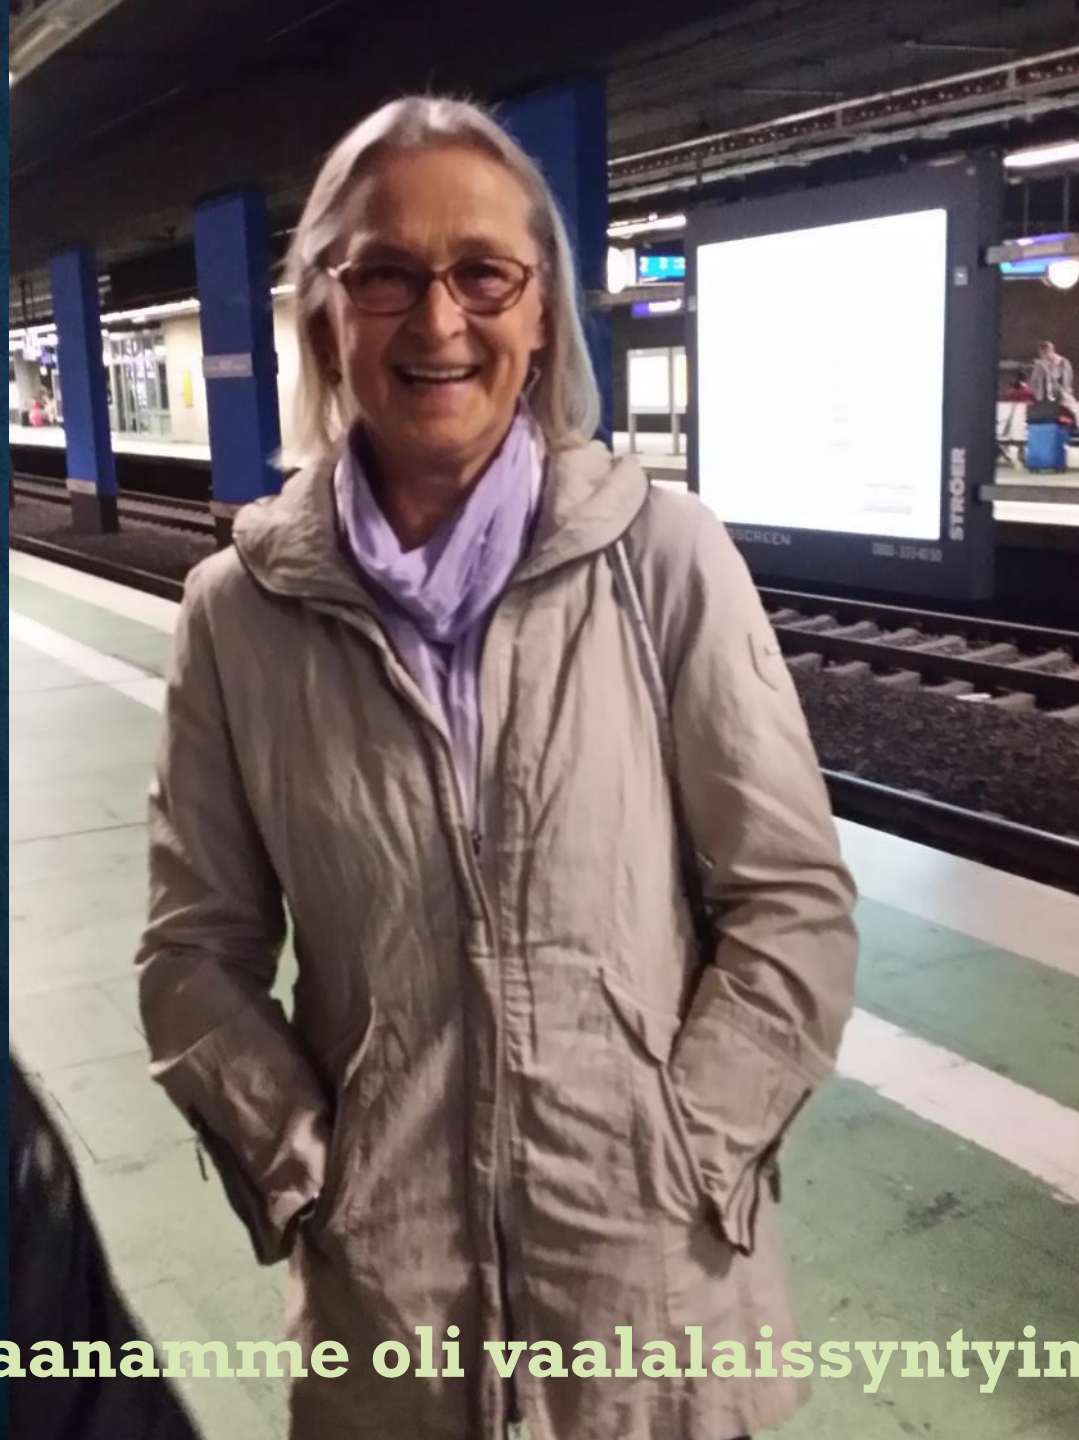

**Oppaanamme oli vaalalaissyntyinen Eila  
Denning**



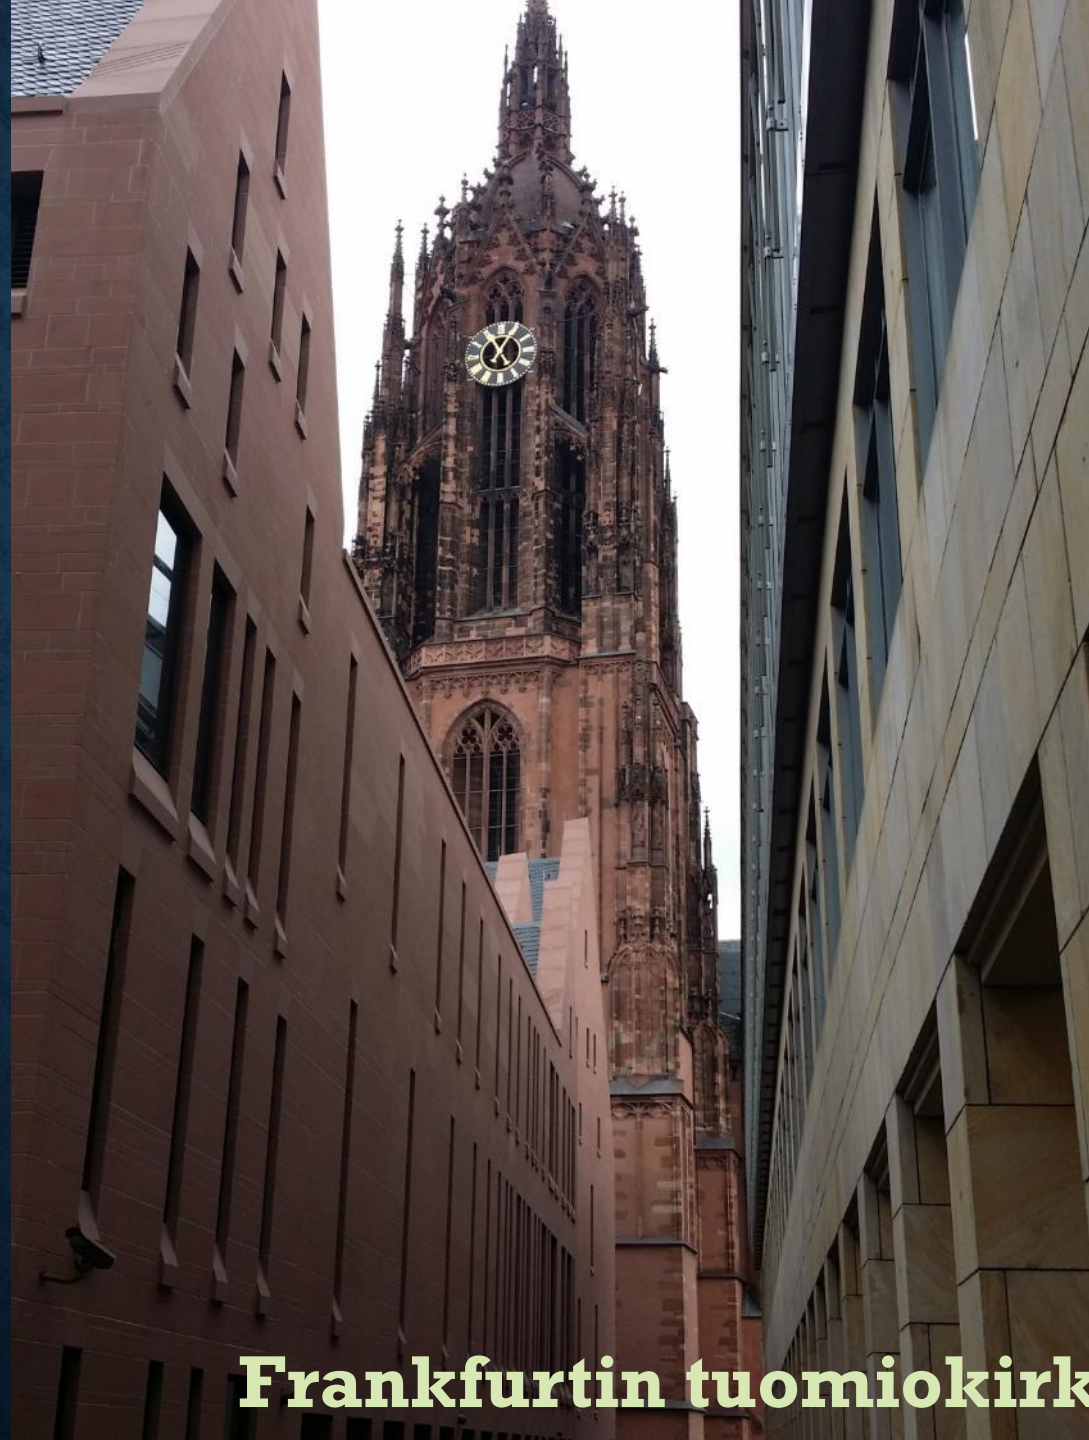

**Frankfurtin tuomiokirkko**



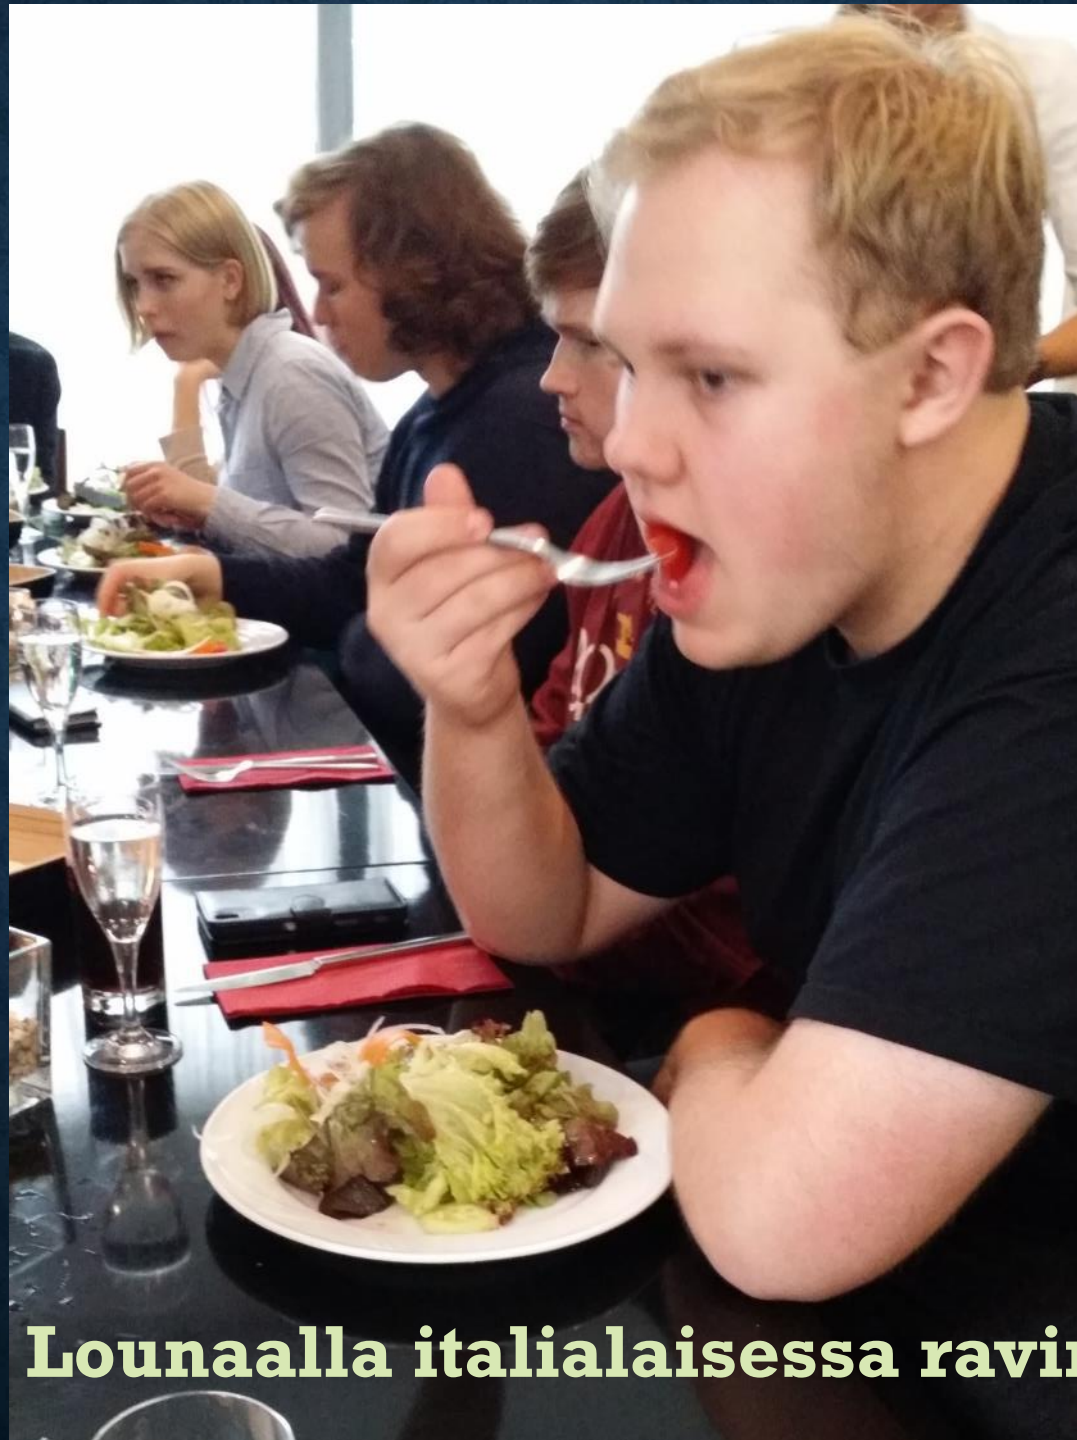

**Lounaalla italialaisessa ravintolassa**



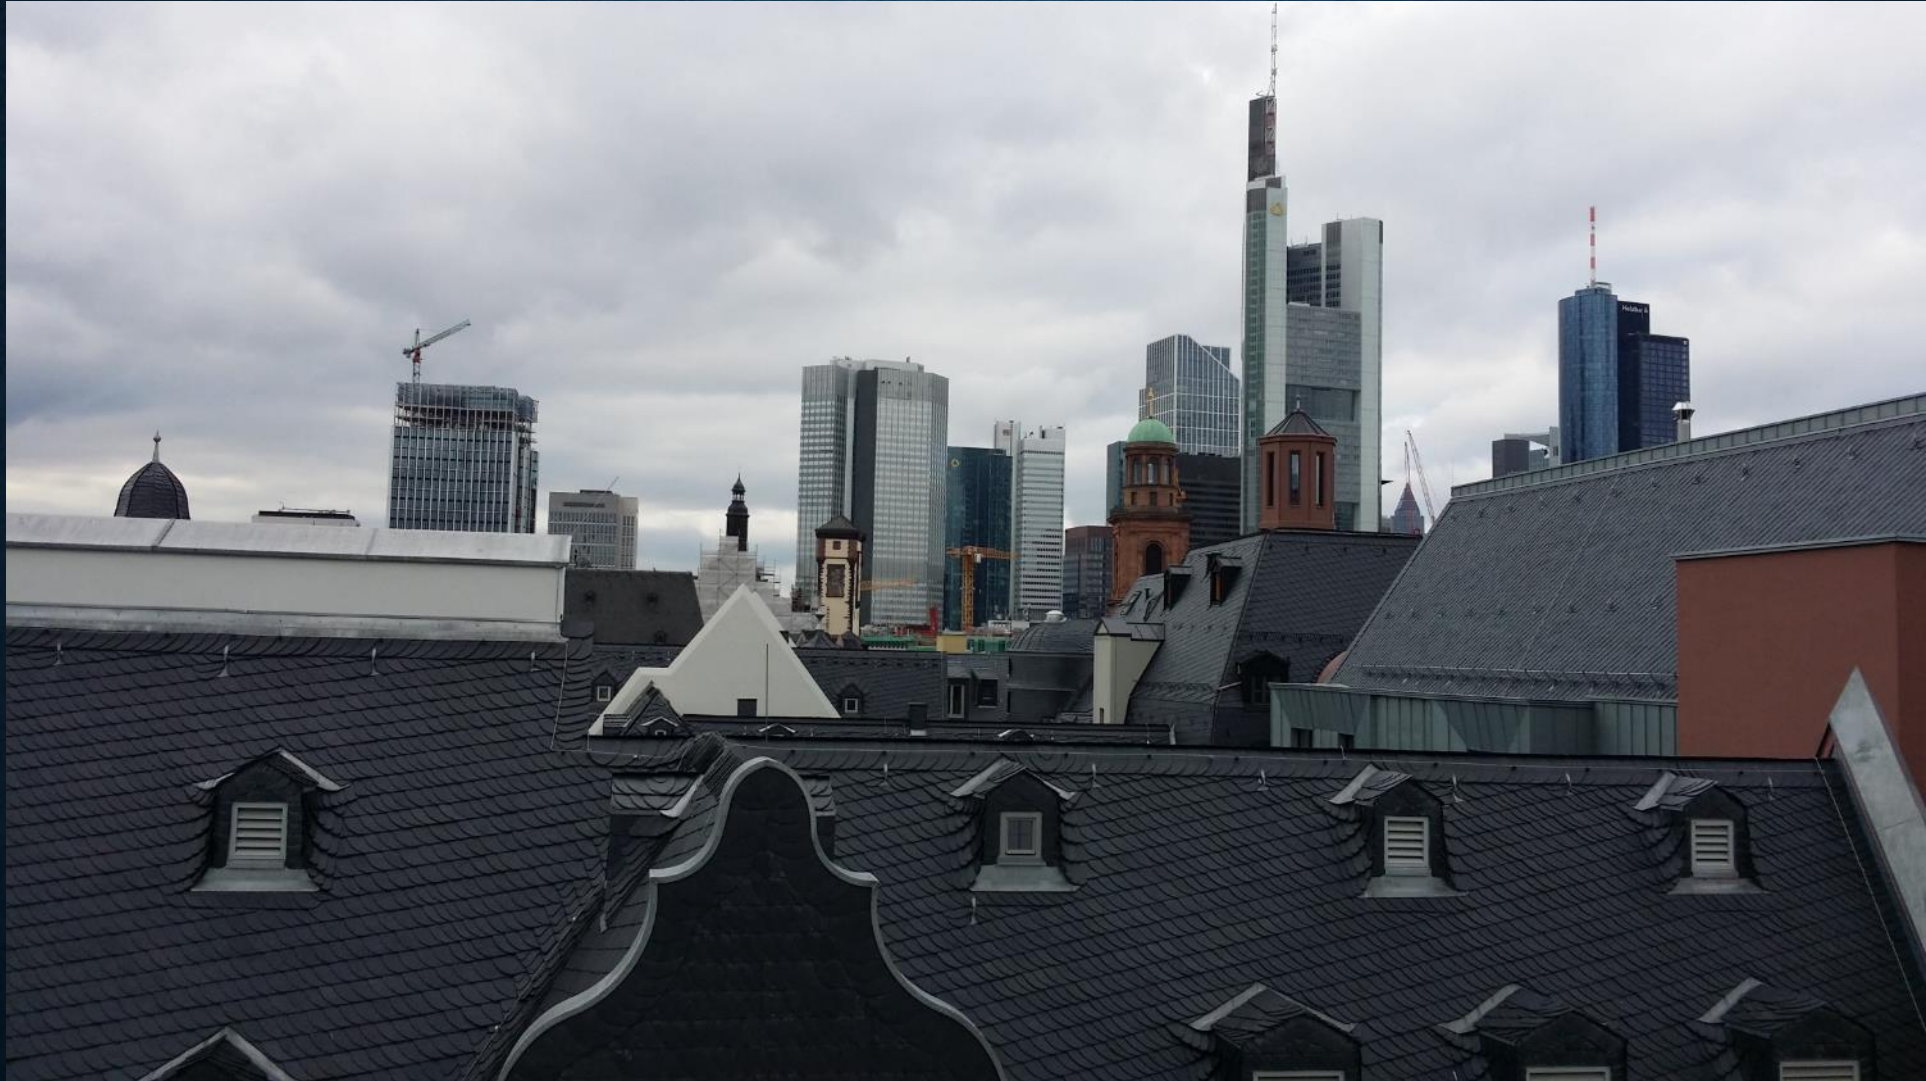

**Frankfurtin kattojen yllä**



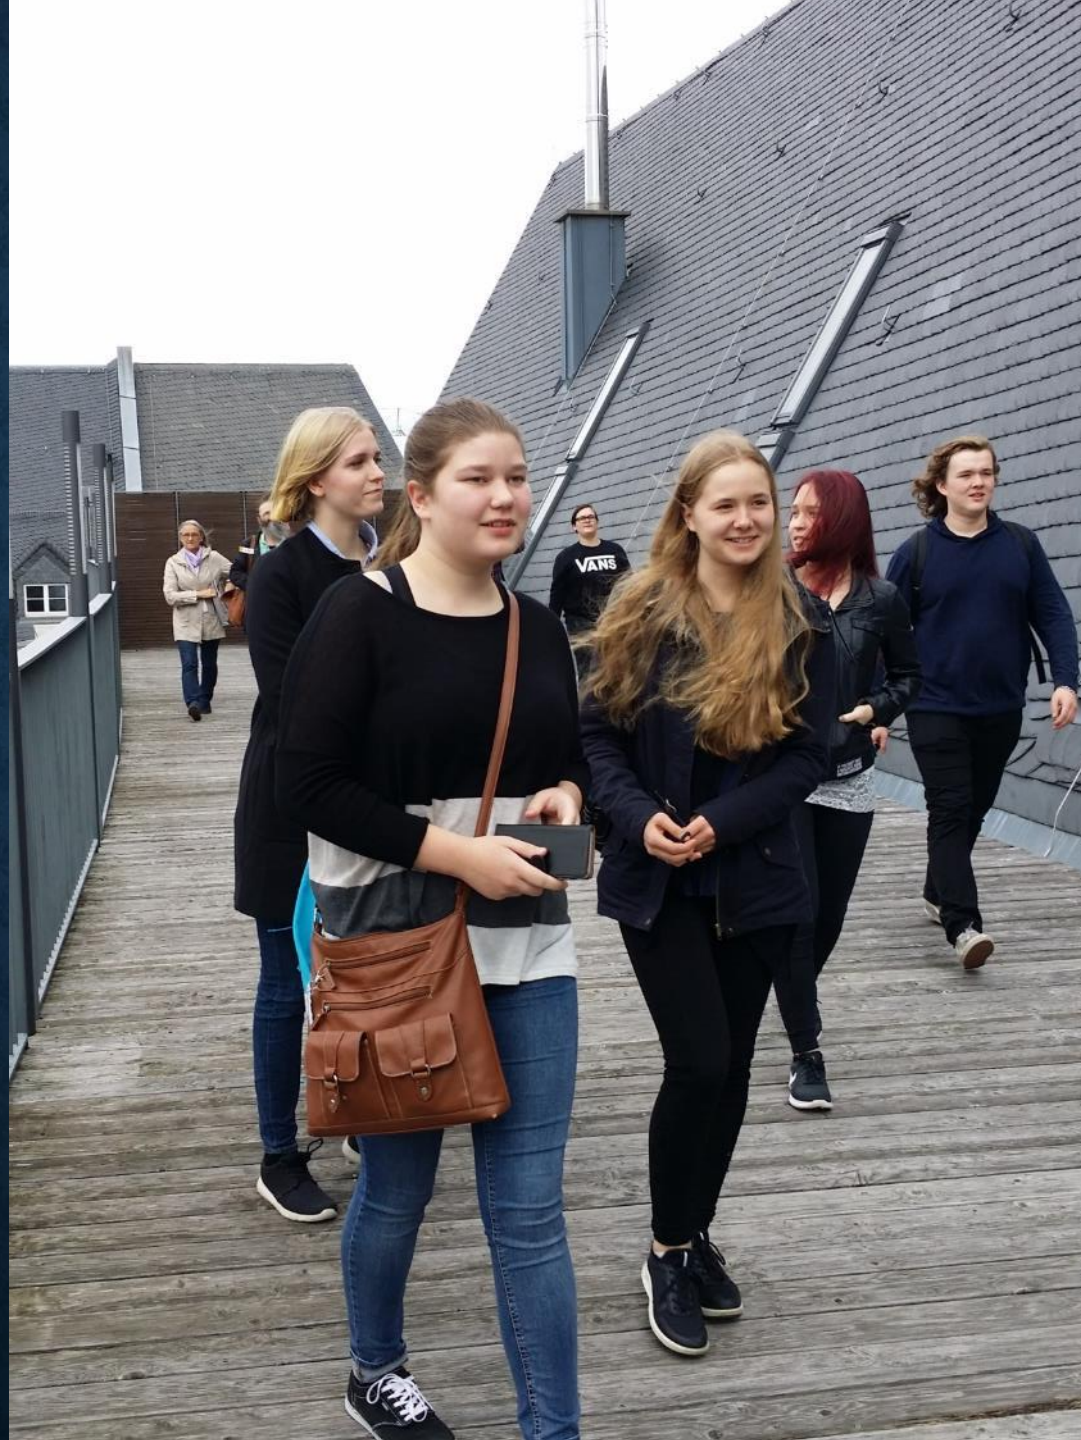



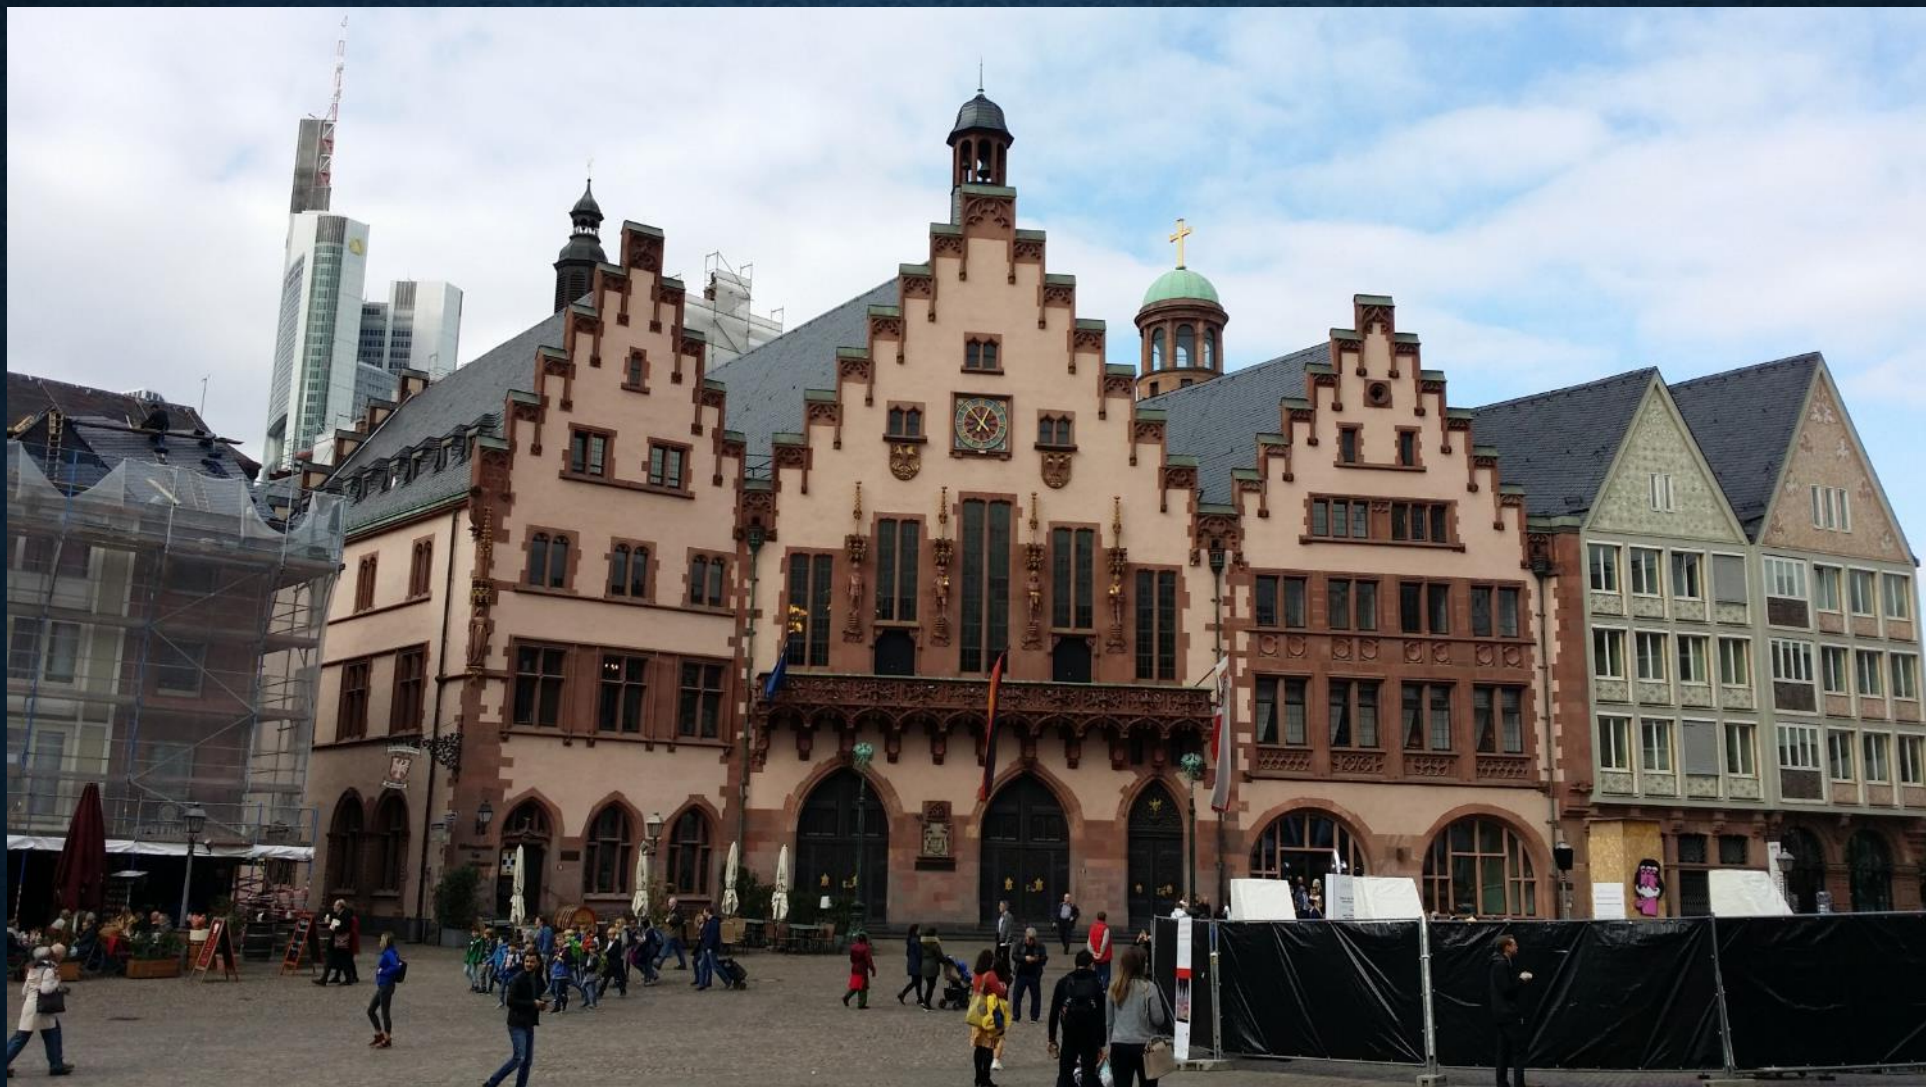

**Frankfurtin kaupungintalo Vanhassa  
kaupungissa**



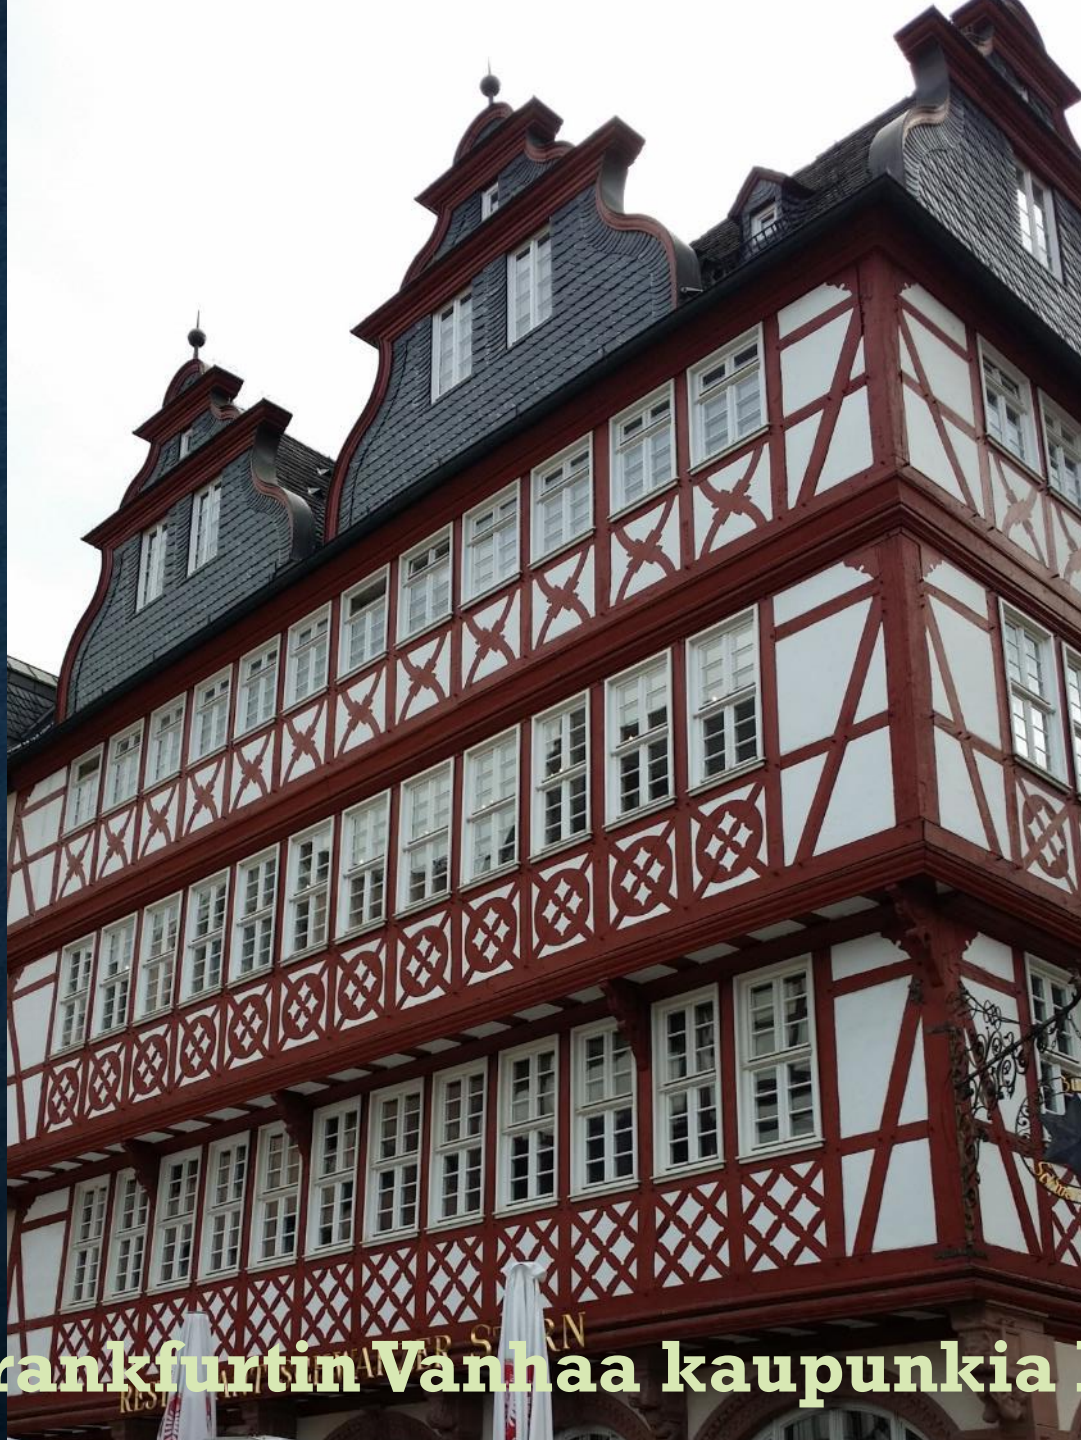

**Frankfurtin Vanhaa kaupunkia Römerin**



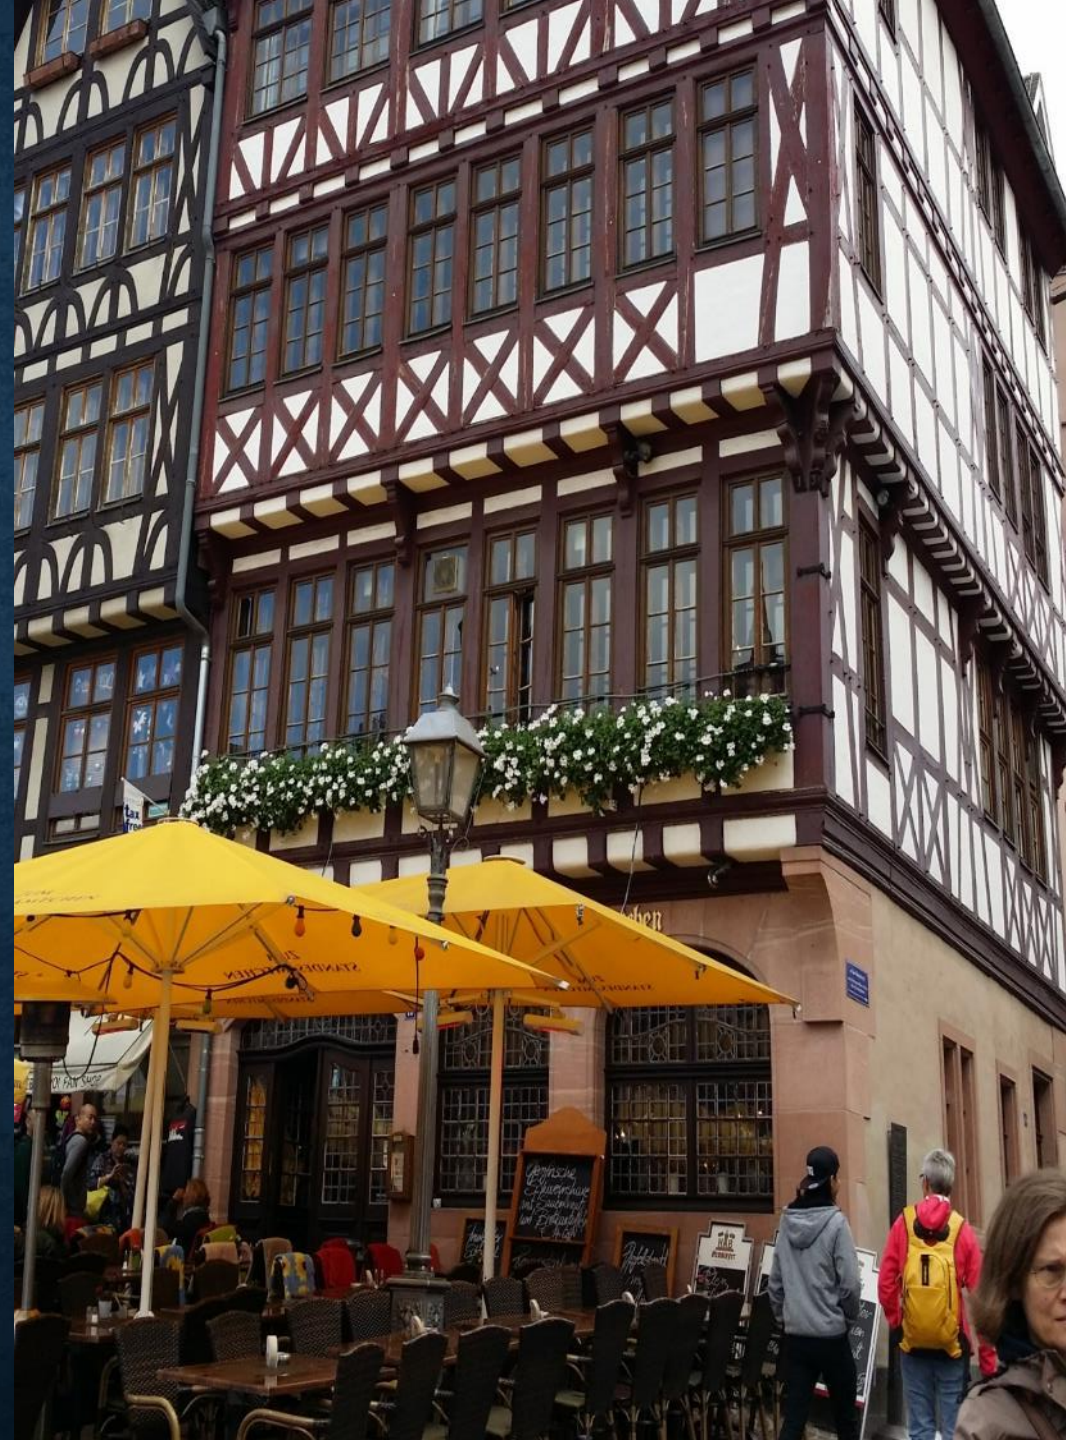



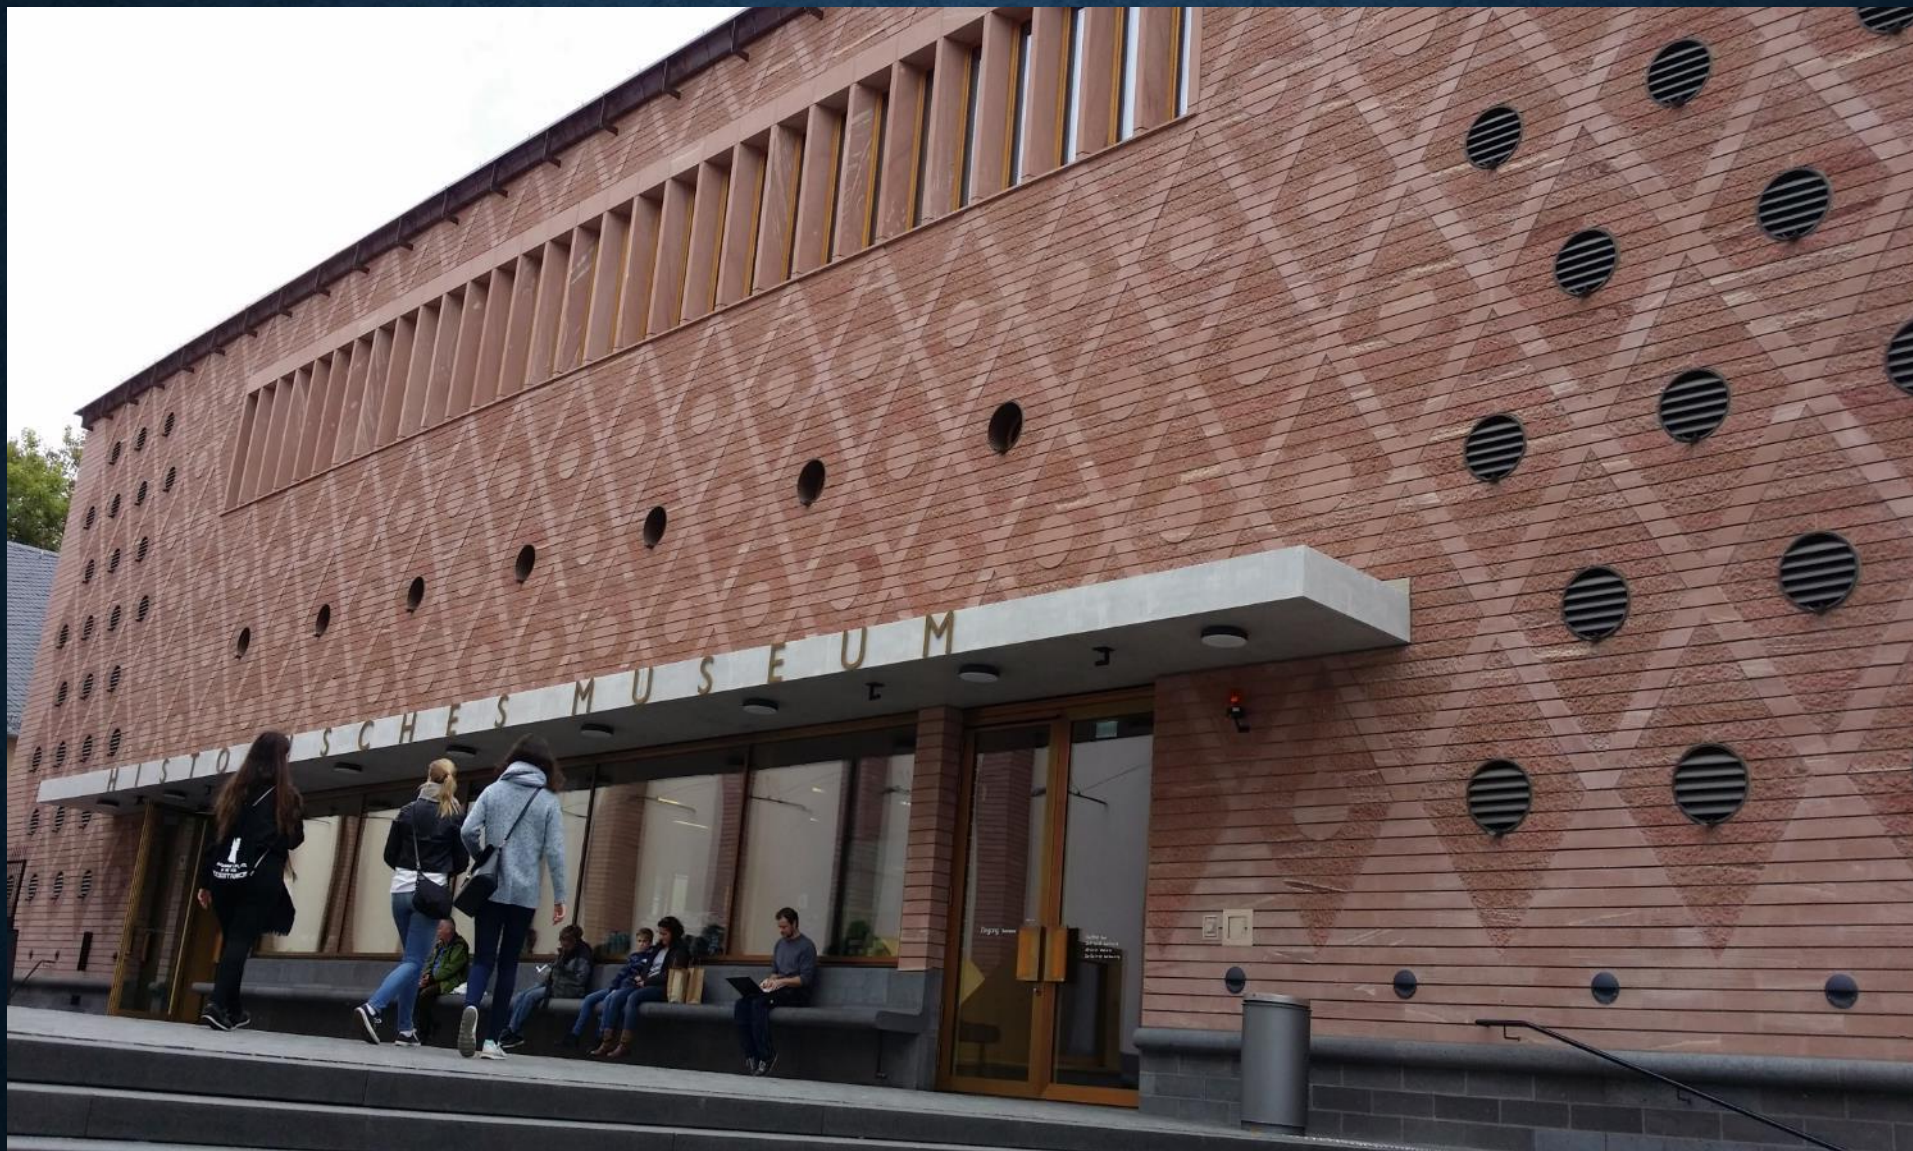

**Vierailimme Historiallisessa  
museossa**



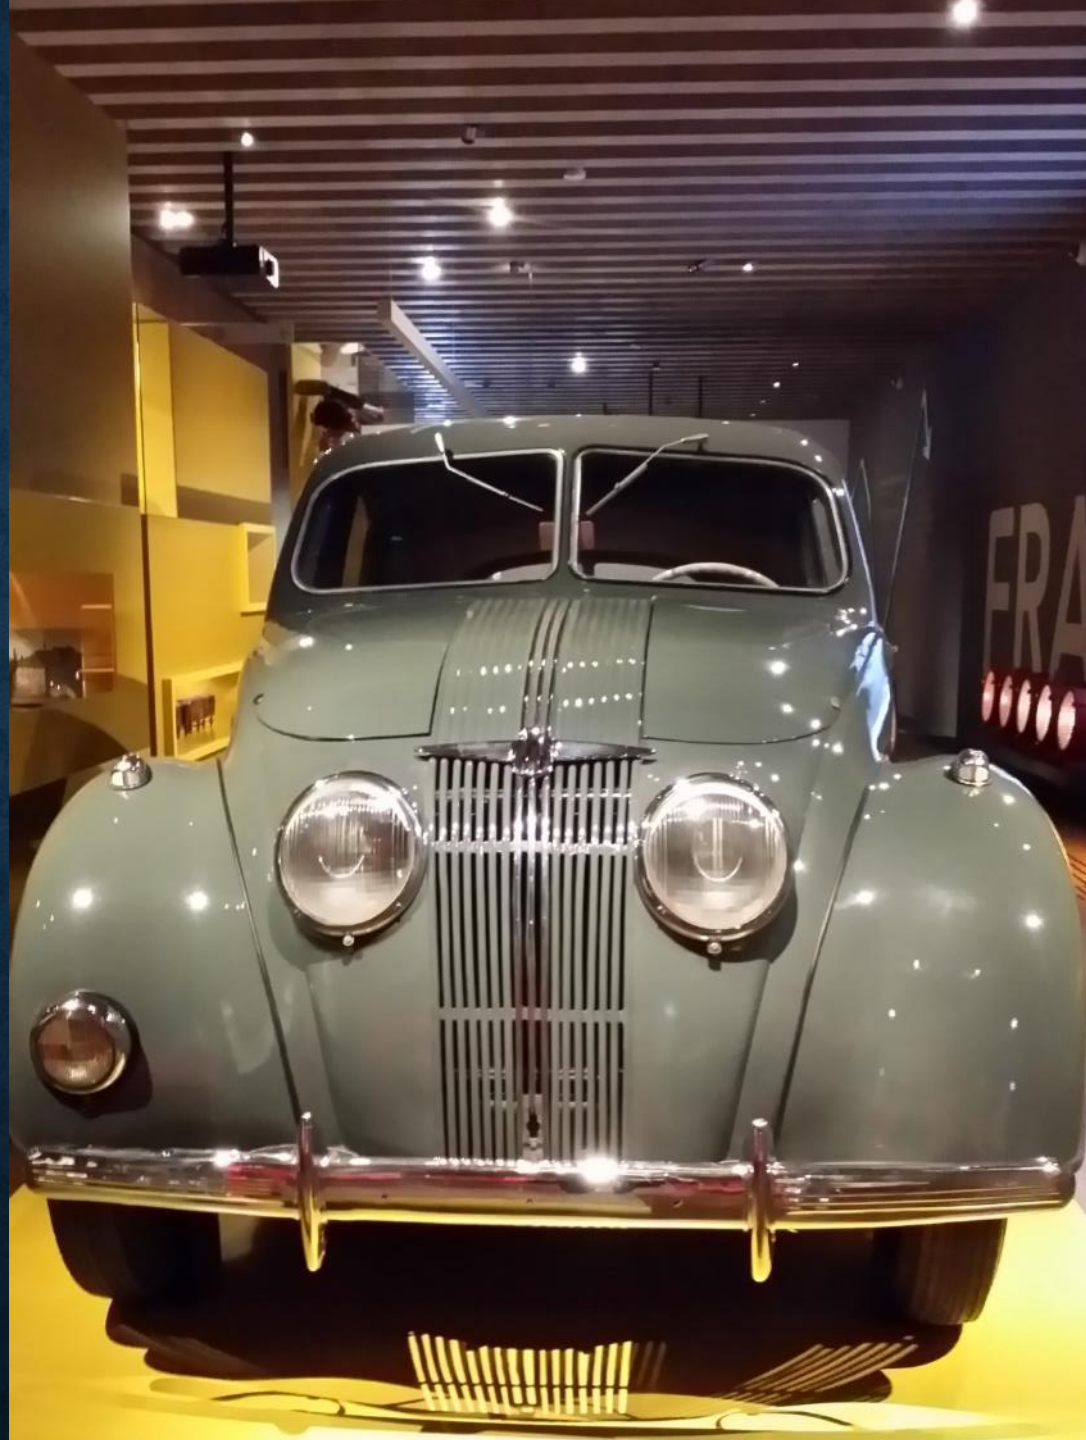



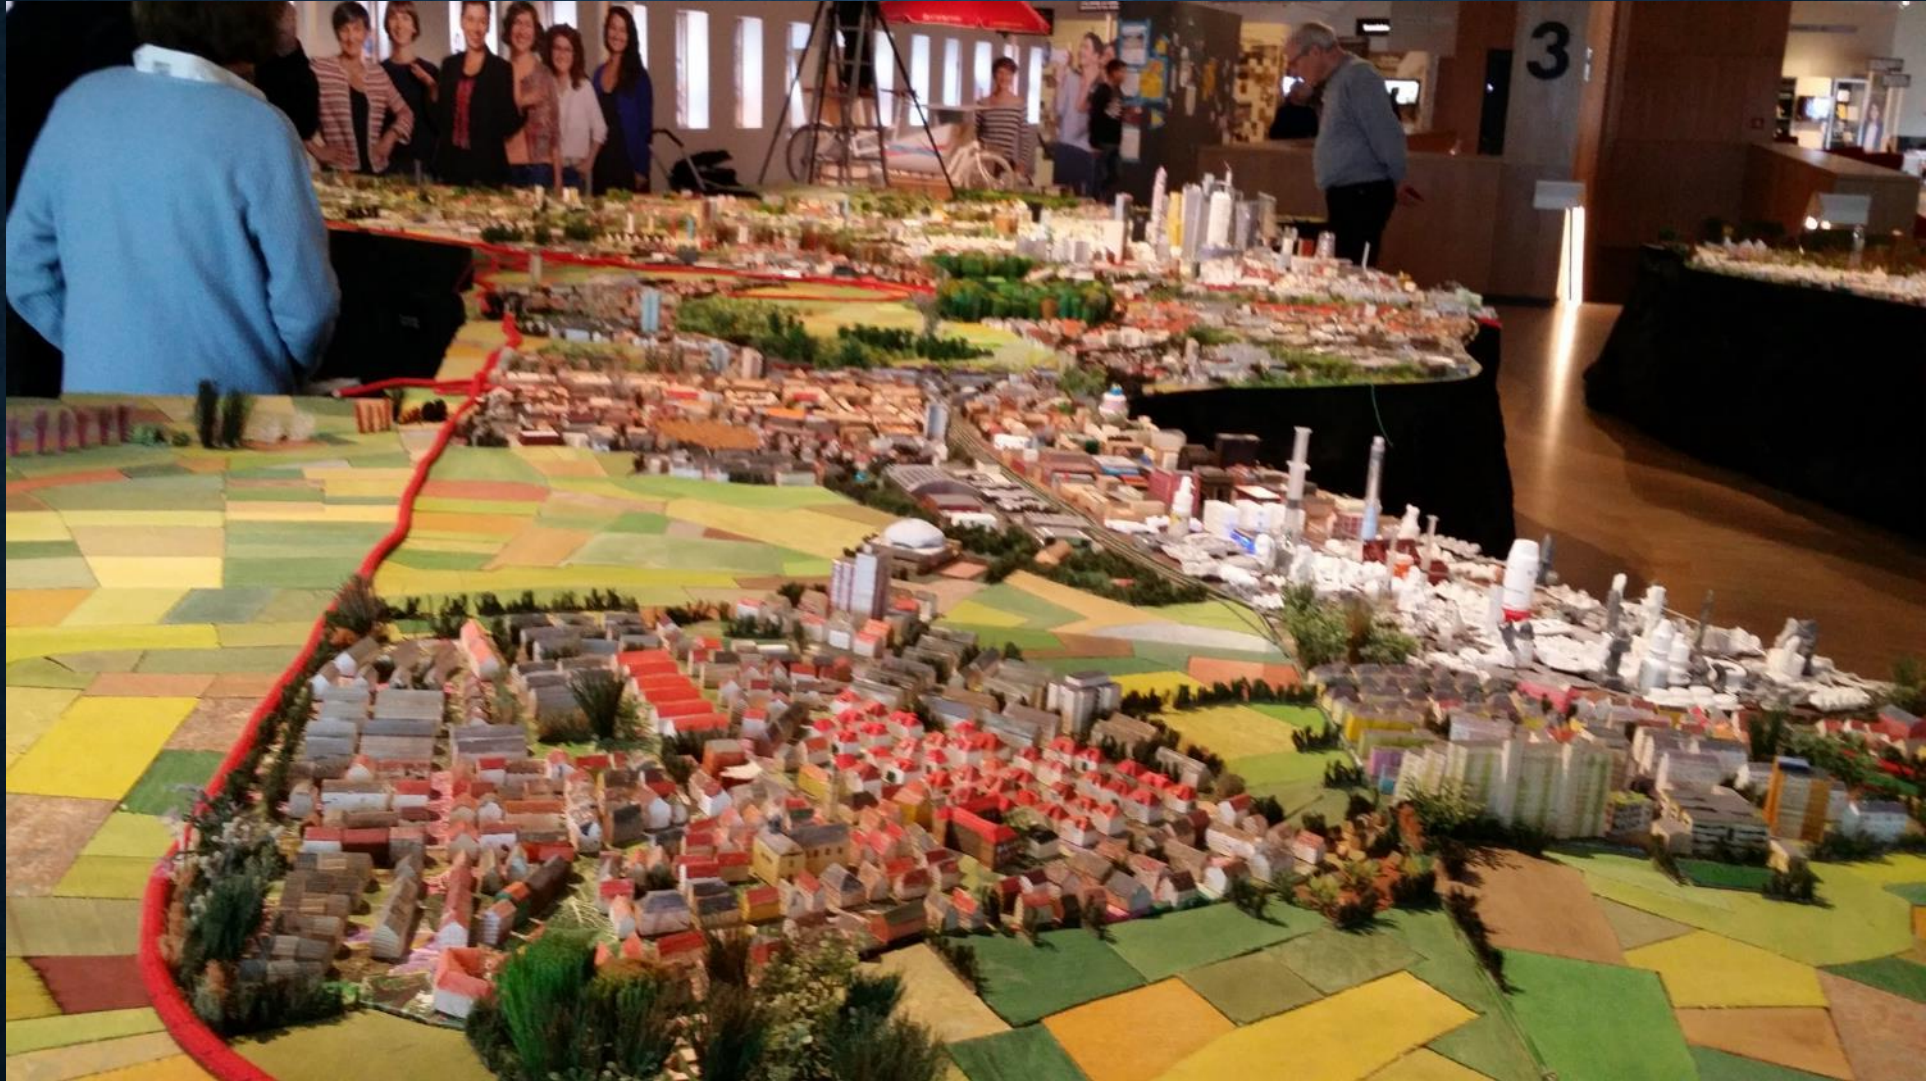

**Pienoismalli Frankfurtista**



**Torstai 12.10.2017 Strasbourgissa Ranskassa**

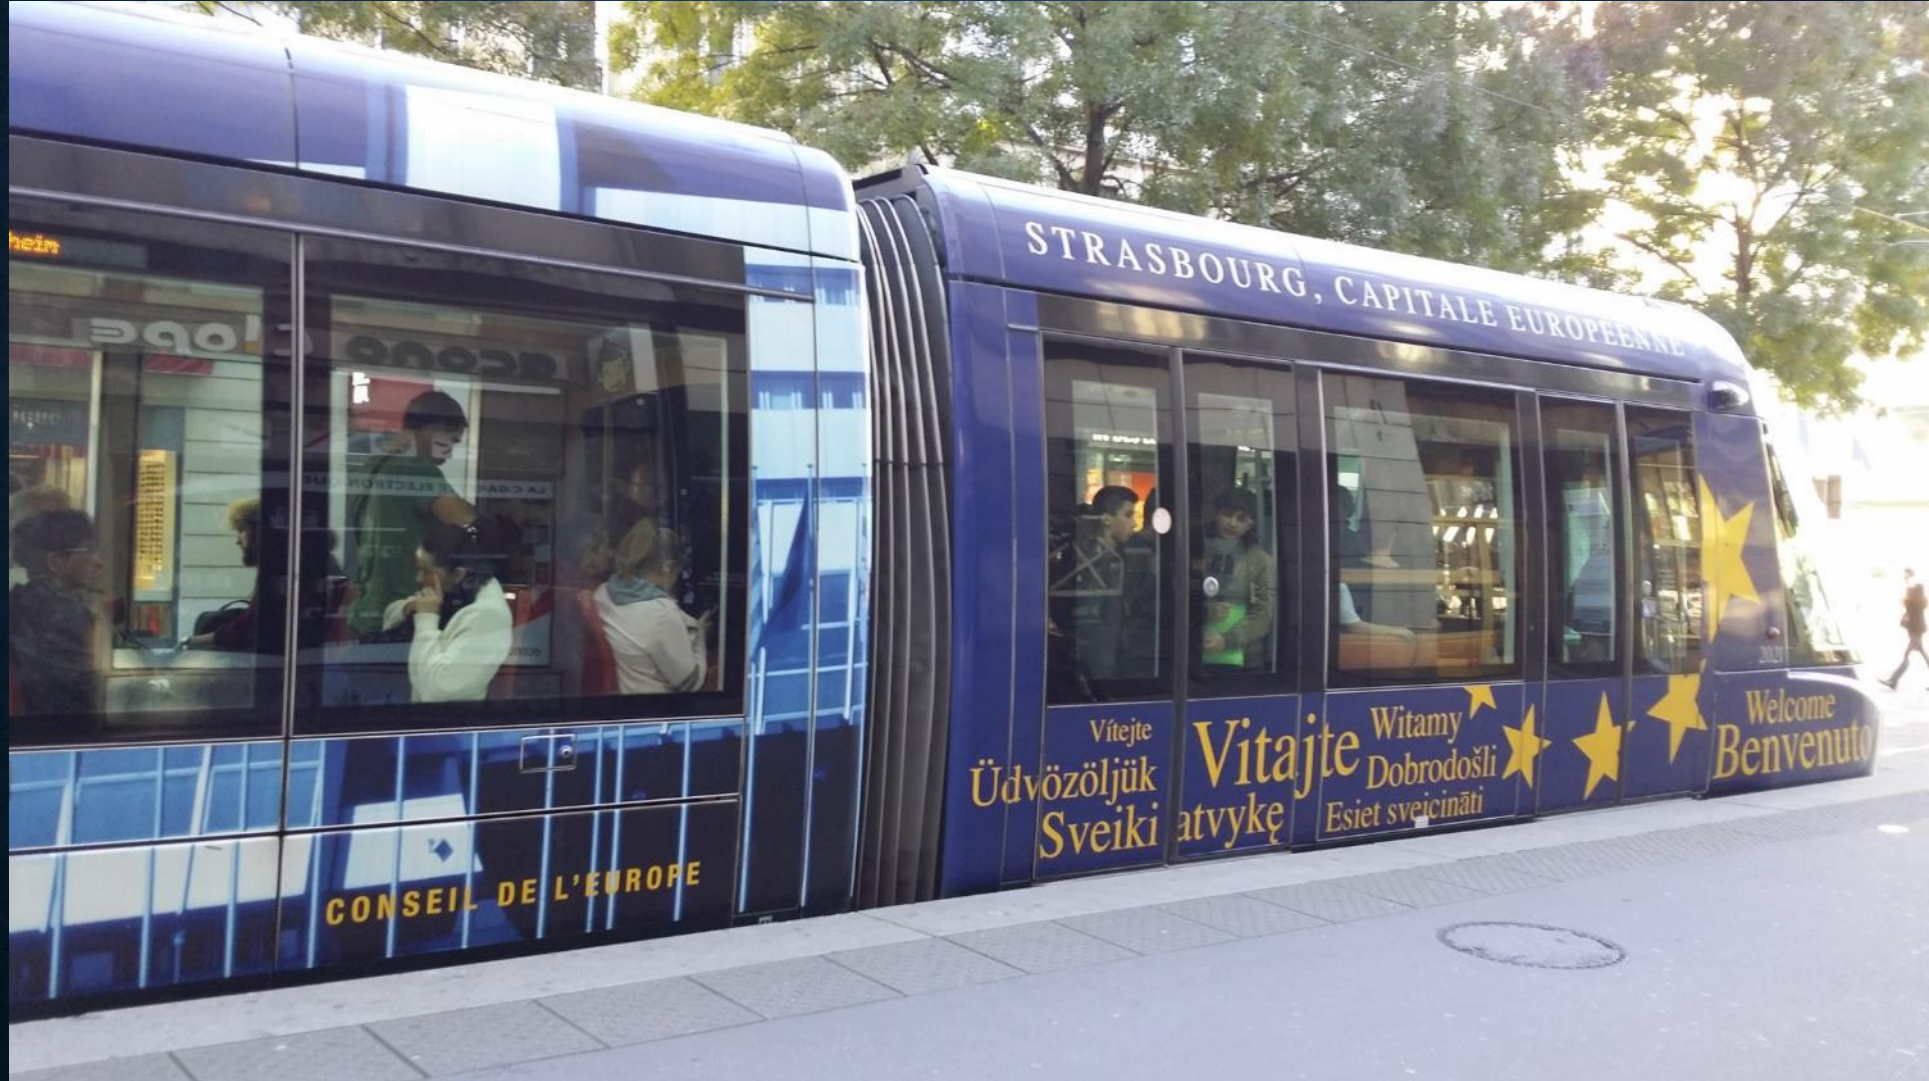

**Matkalla Europarlamenttiin**



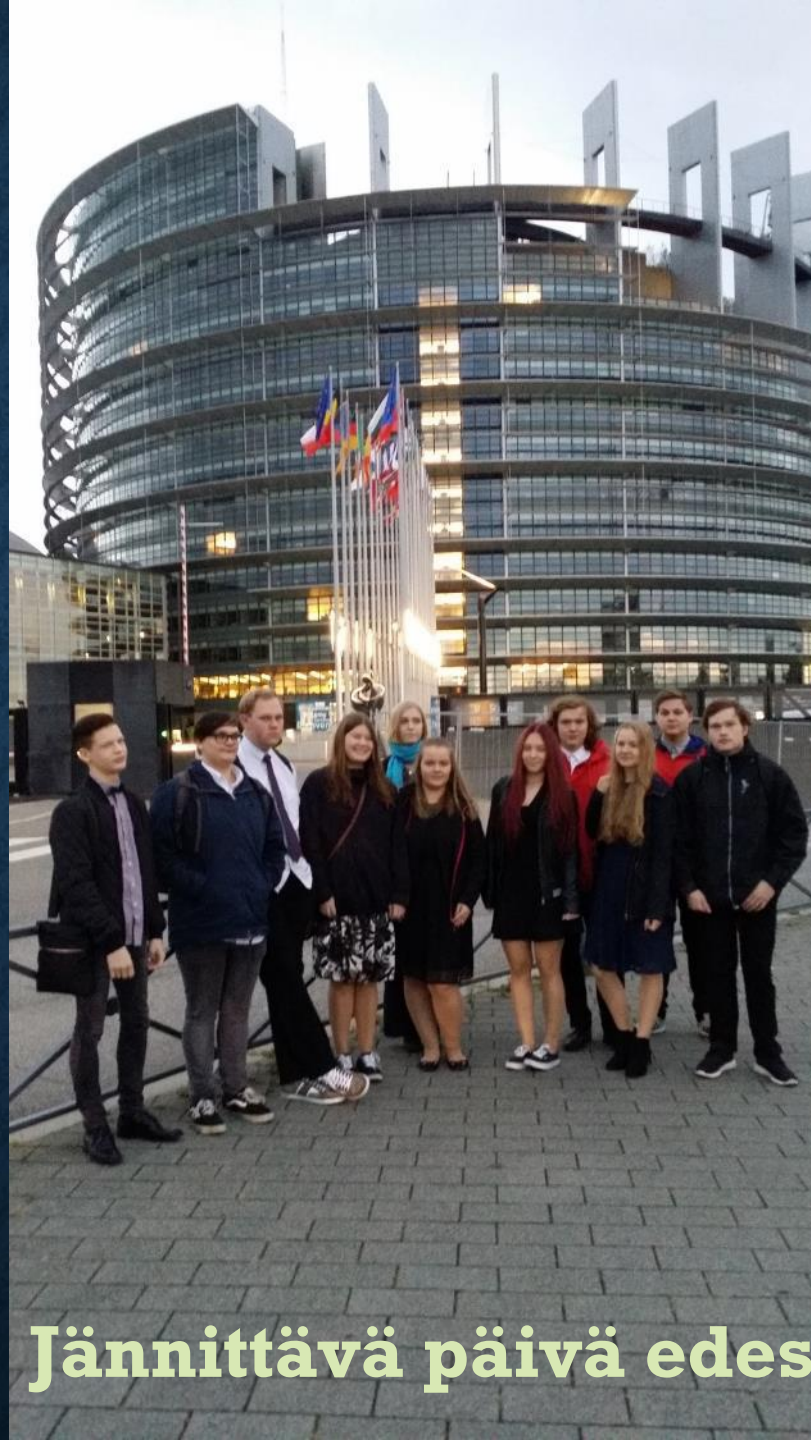

**Jännittävä päivä edessä**



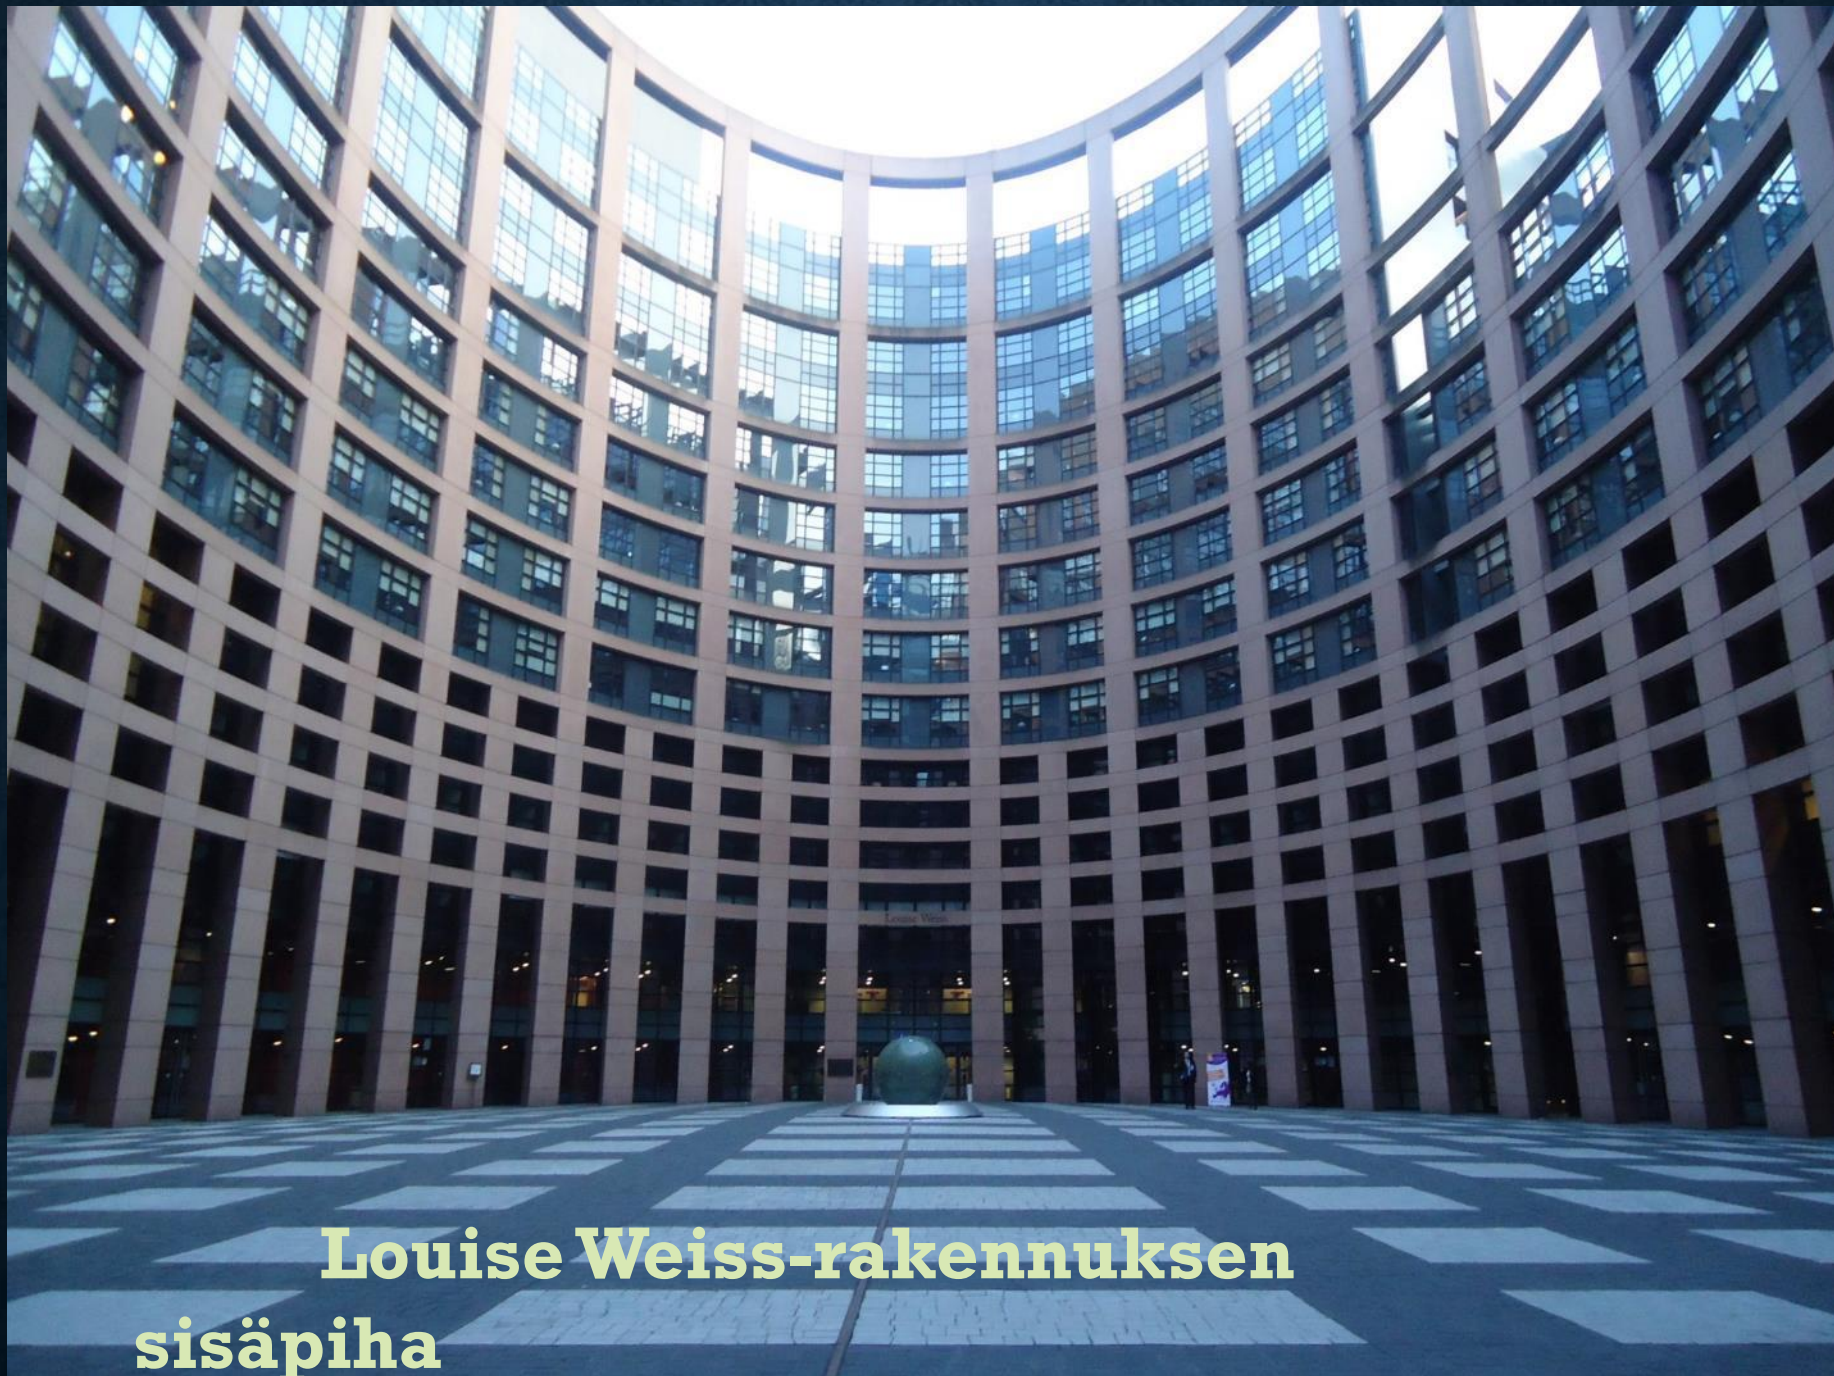

**Louise Weiss-rakennuksen  
sisäpiha**



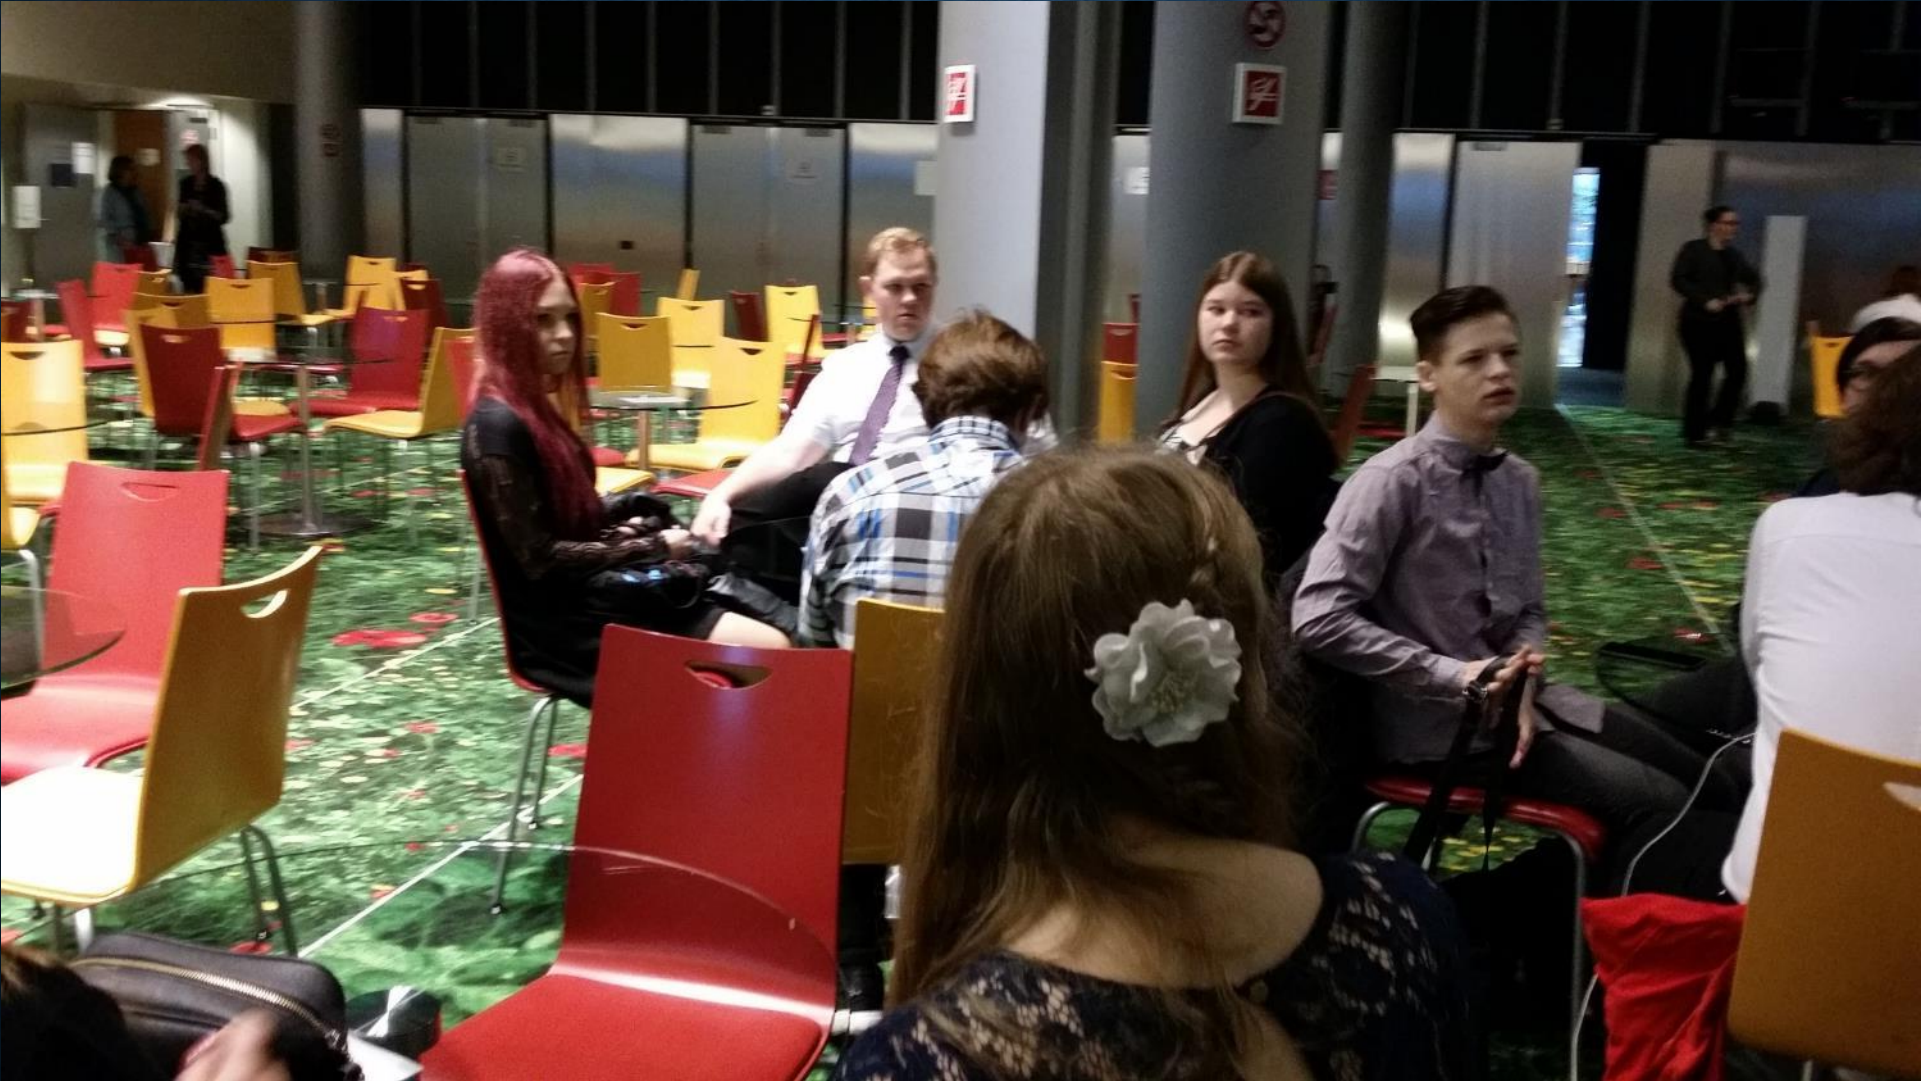

**Päivän ohjeet ja ryhmiin**



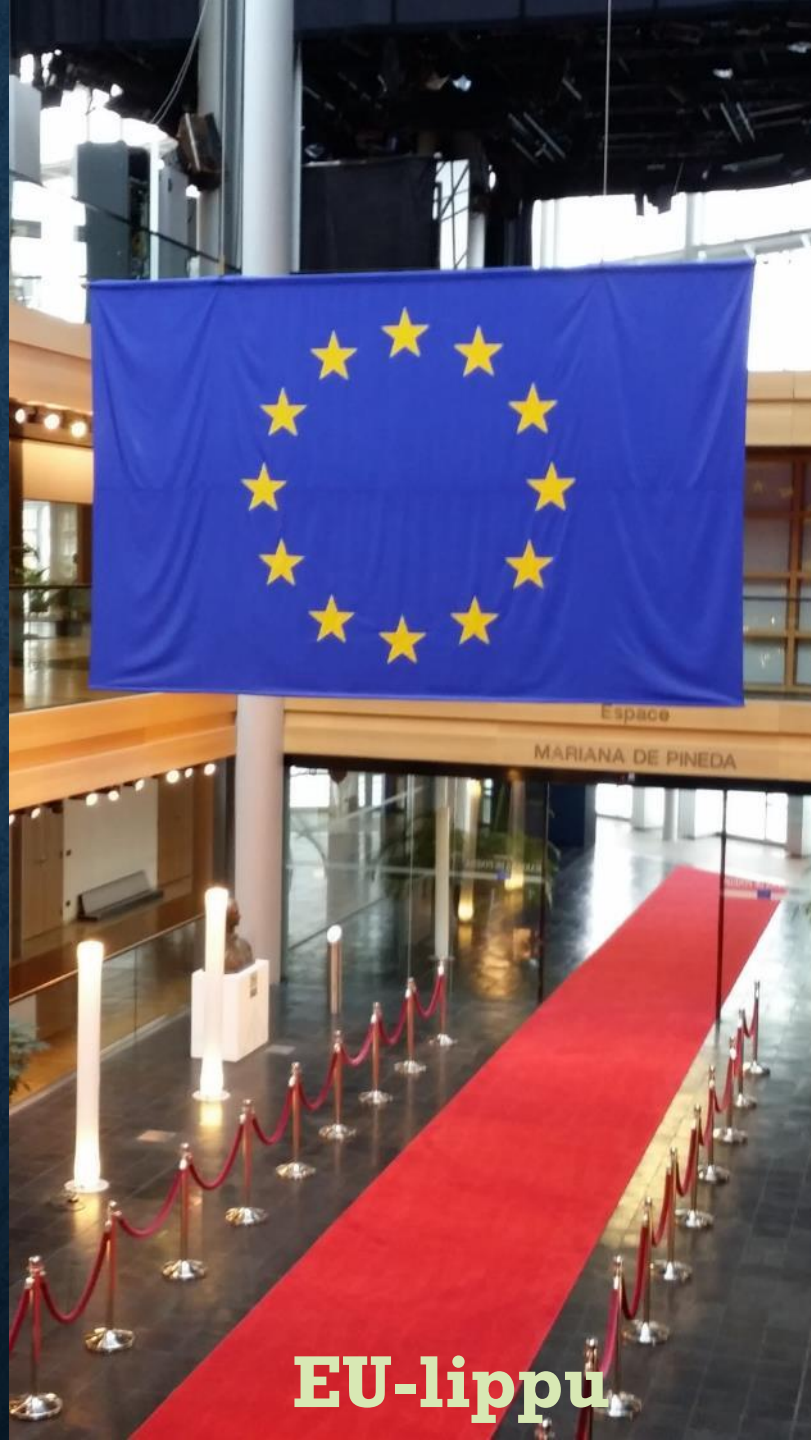

**EU-lippu**



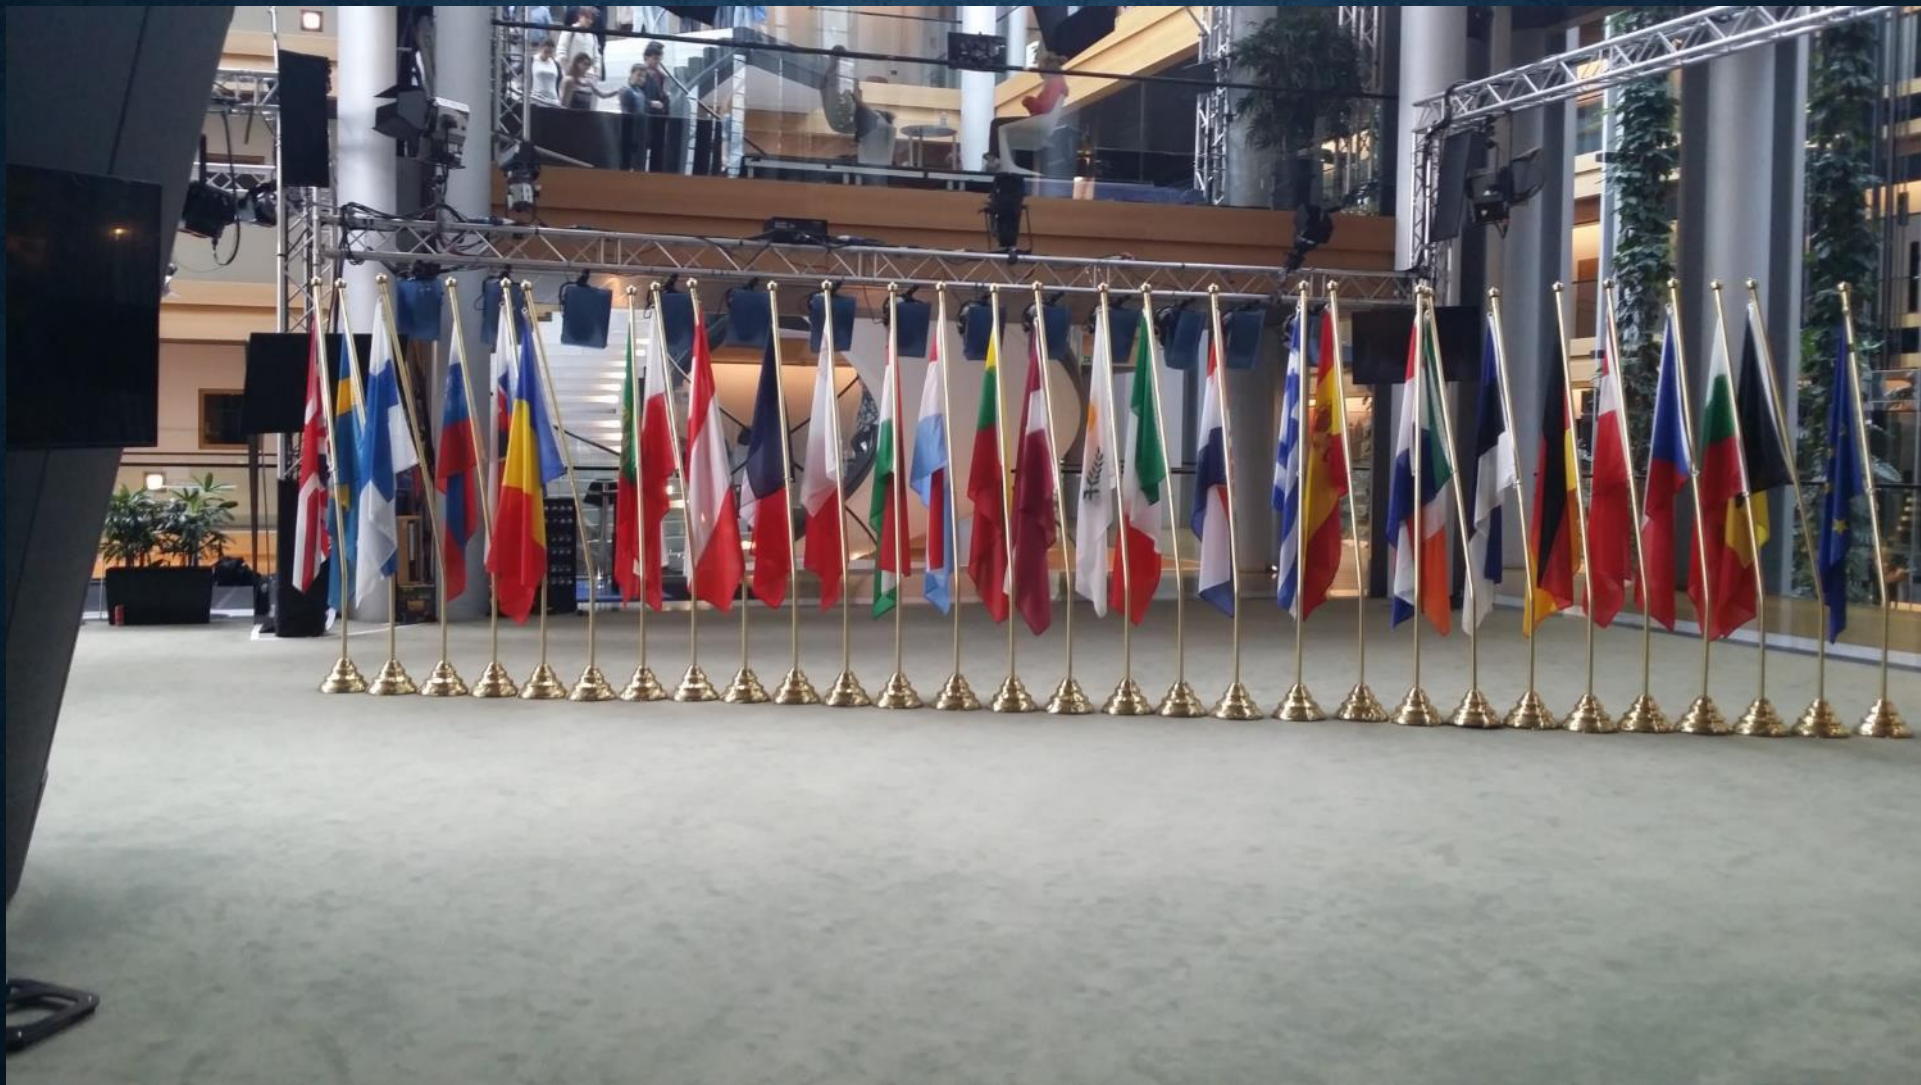

**EU:n 28 jäsenmaan liput**



# Europarlamentin istuntosali 12.10.2017

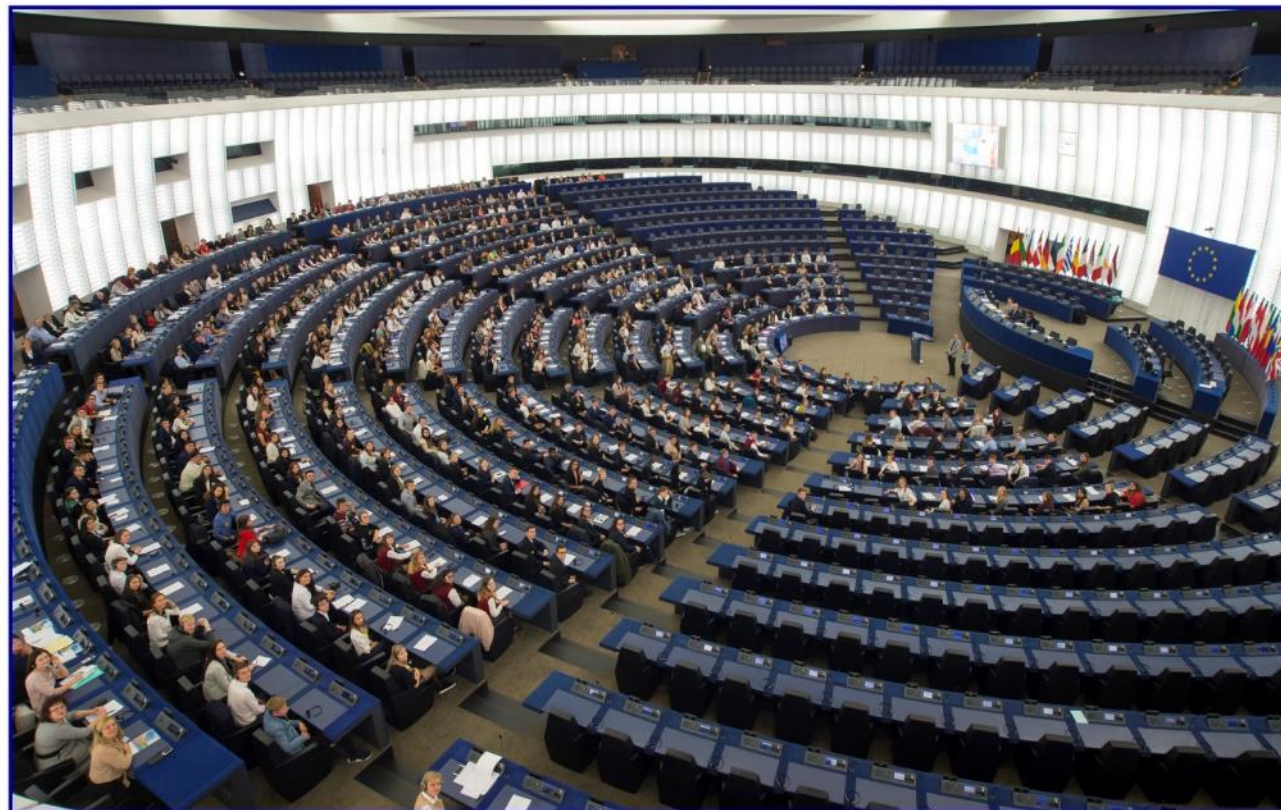

EUROSCOLA DU 12 OCTOBRE 2017  
PARLEMENT EUROPÉEN À STRASBOURG

Opiskelijoita ja opettajia 24 eri maasta



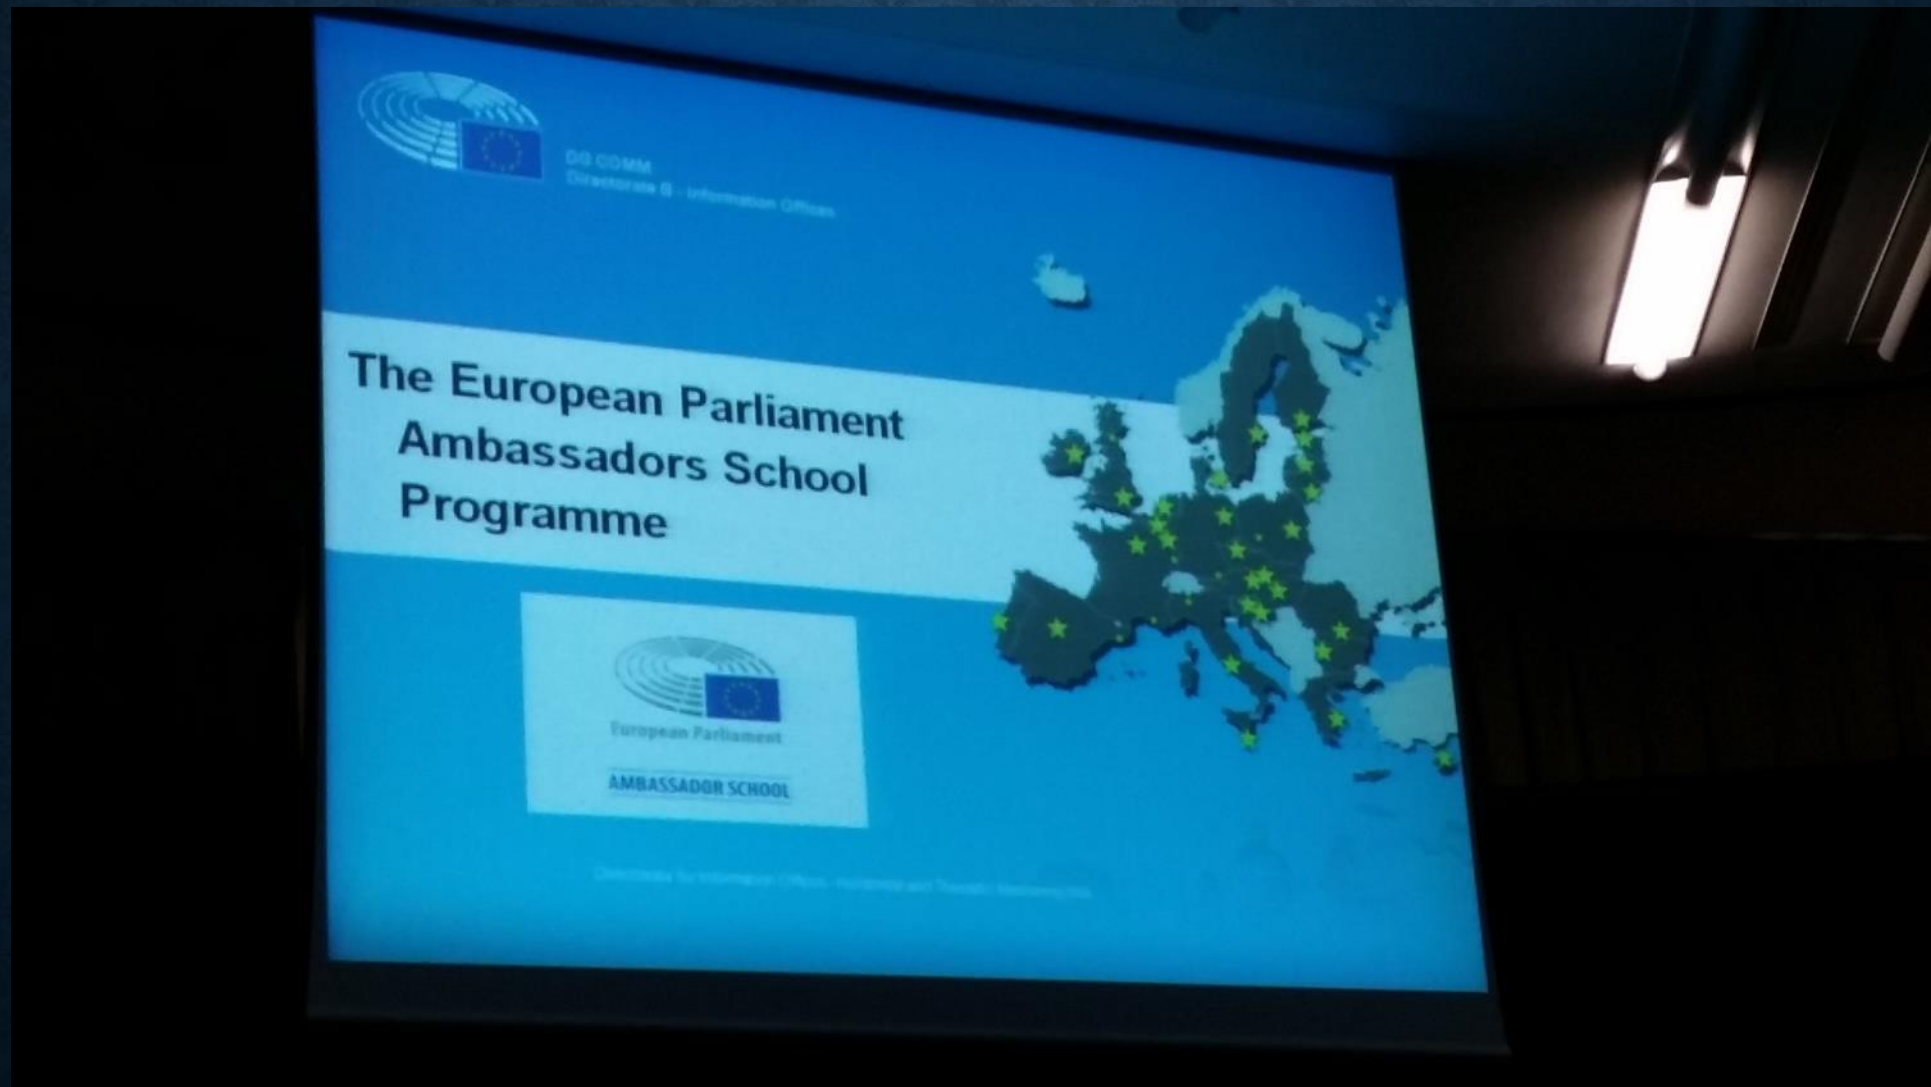

**Euroscola-päivä oli tarkoitettu ns. EPAS-projektiin osallistuville kouluille.**



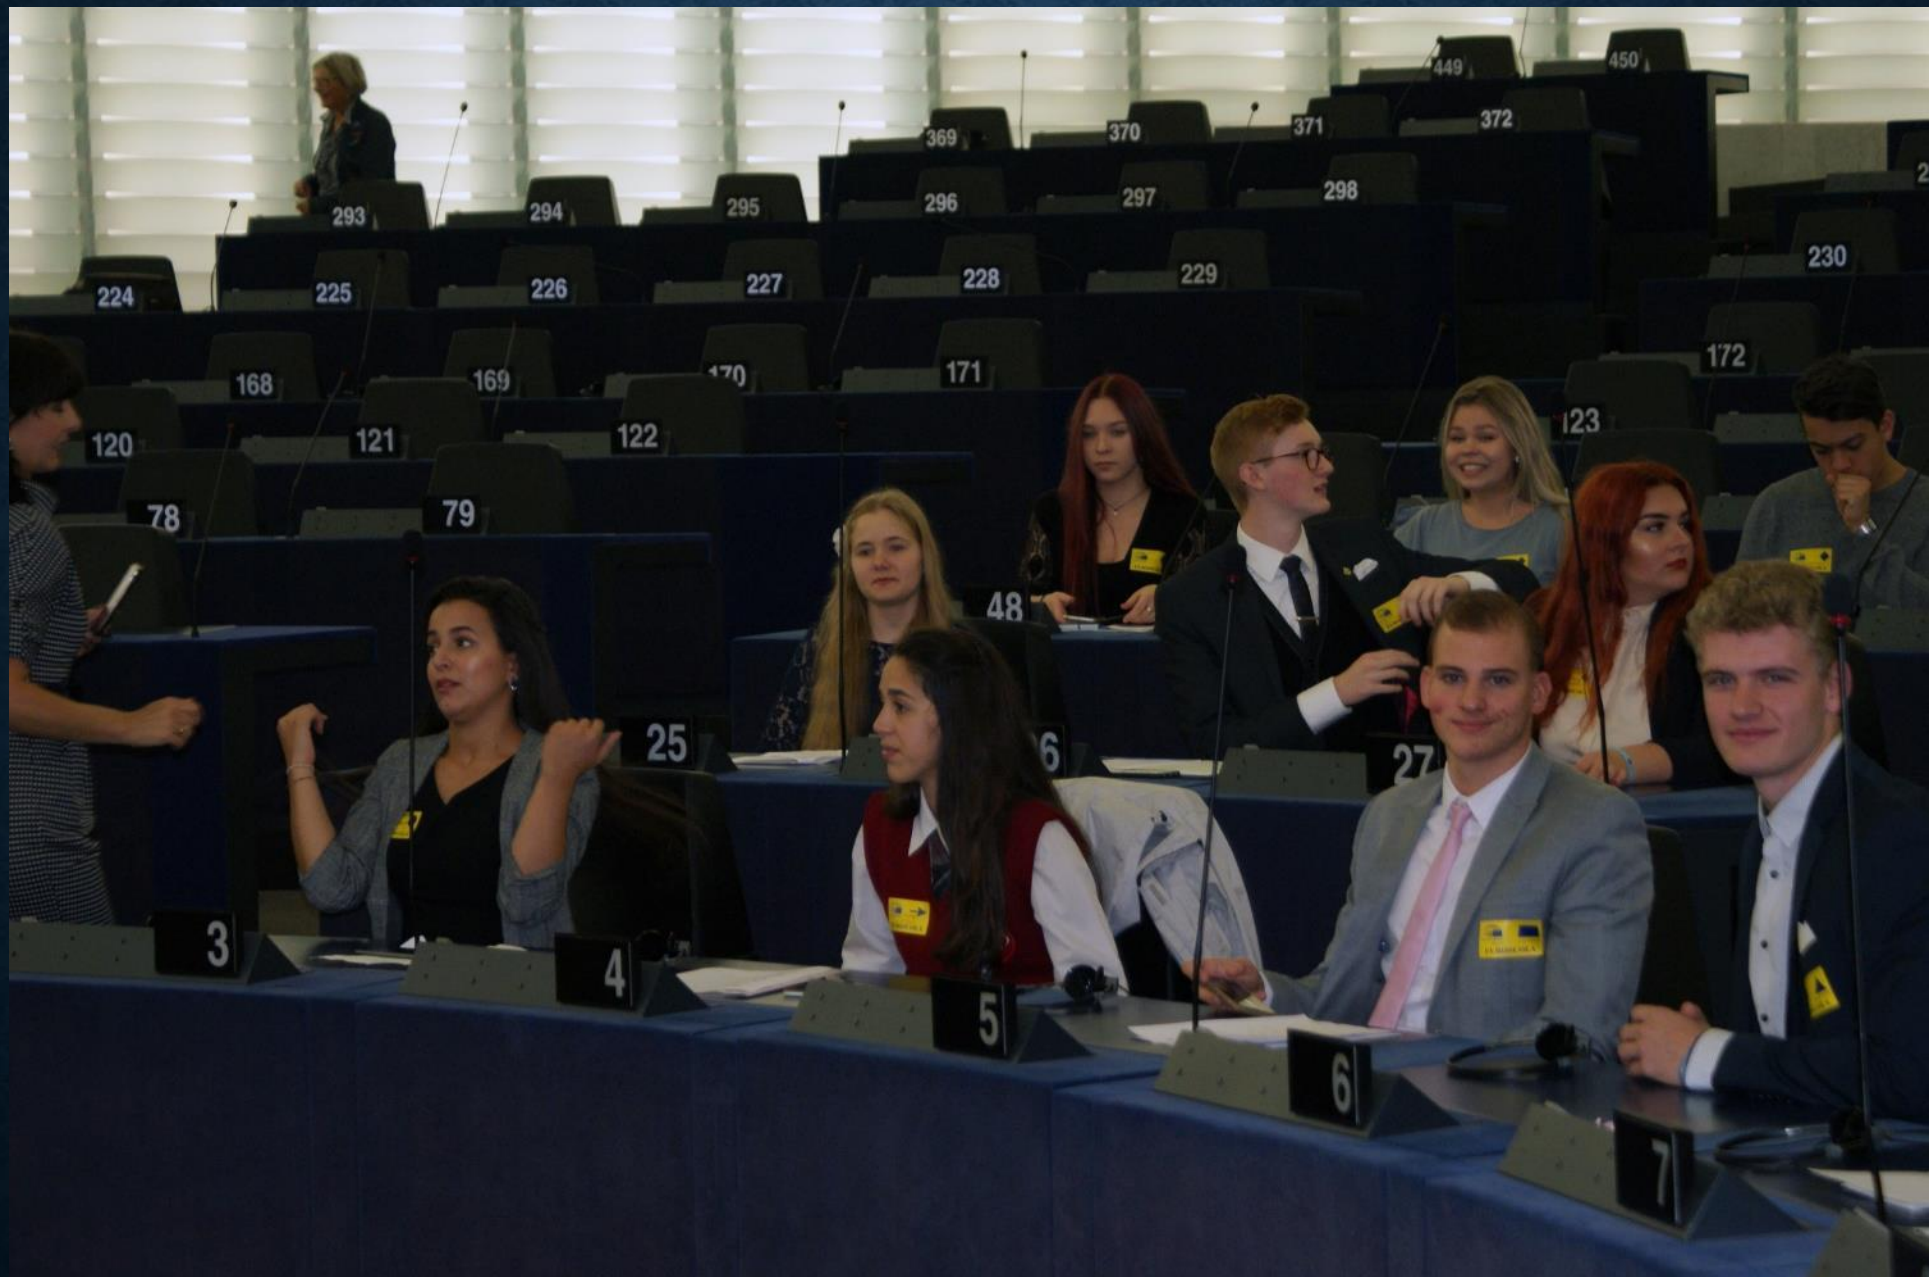

**Petriina ja Silja odottavat tyynesti vuoroaan**



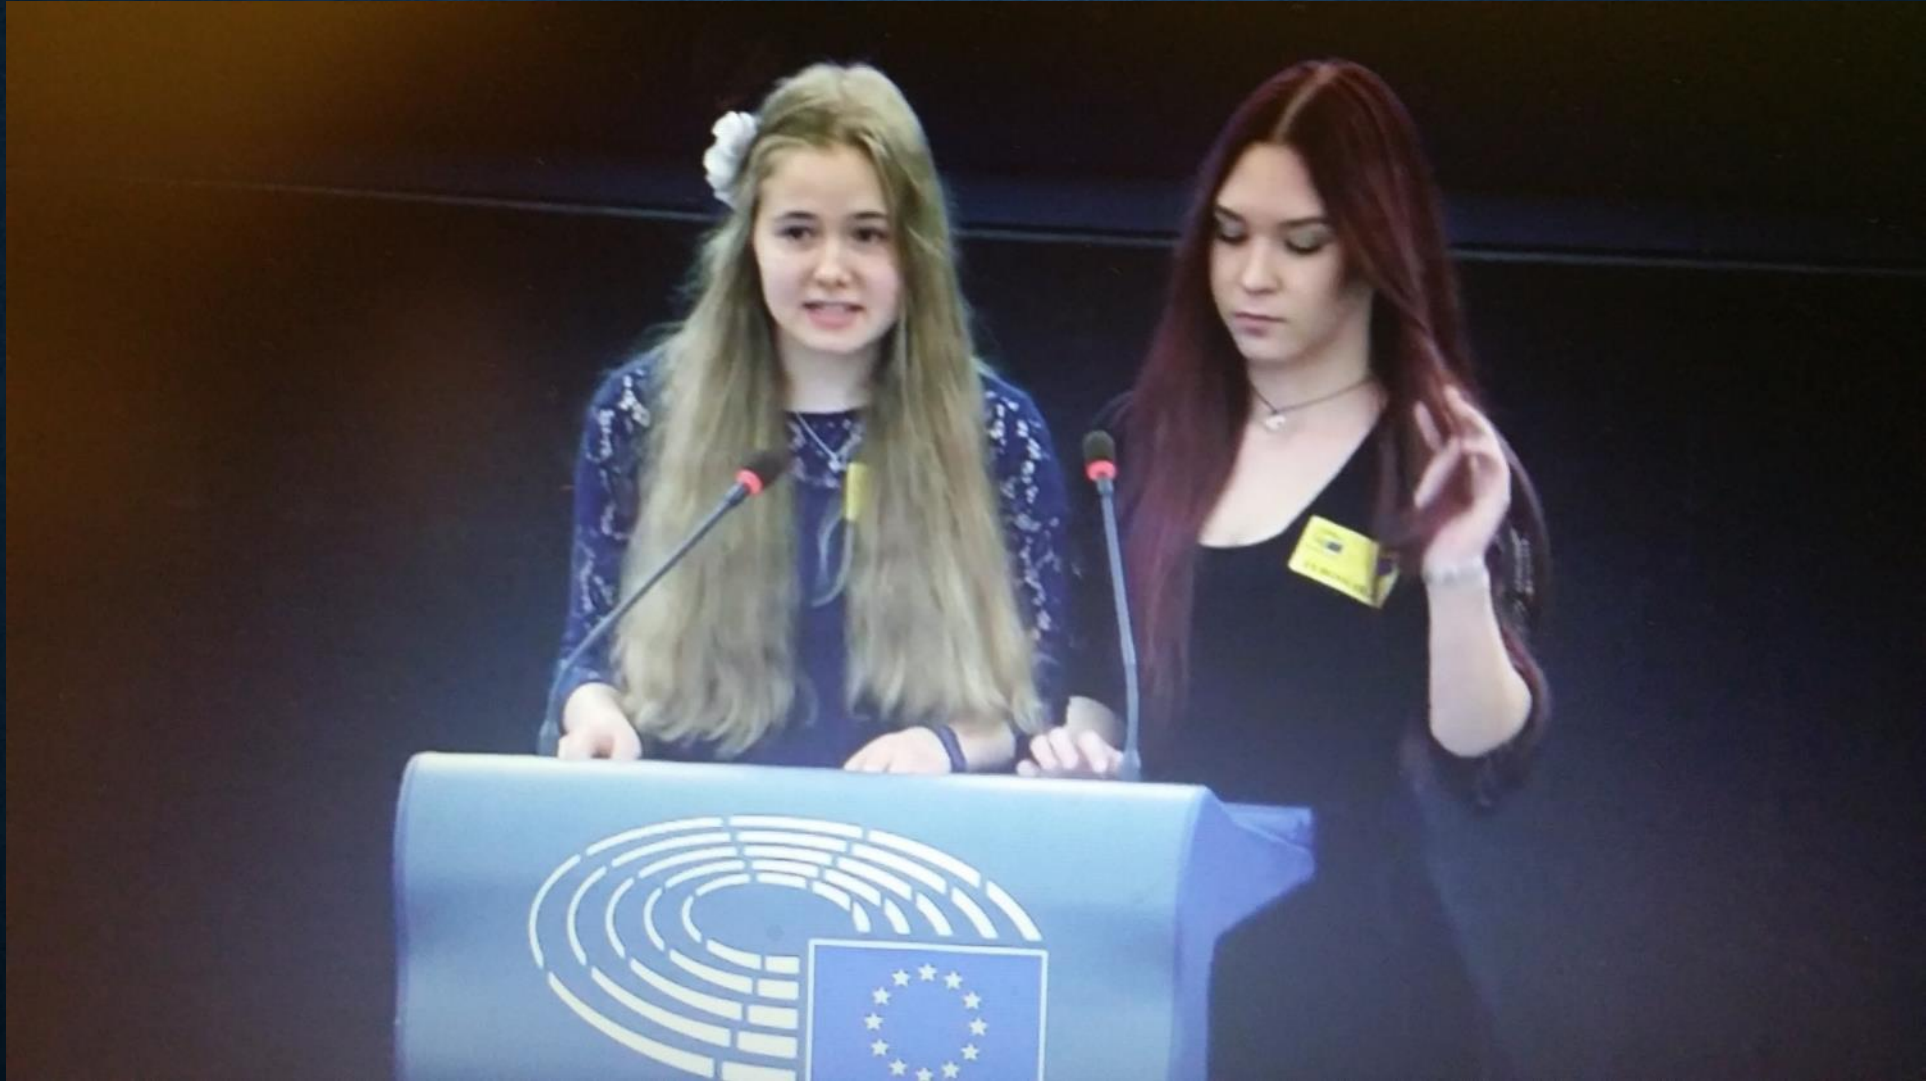

**Petriina ja Silja esittelevät Suomea, Vaalaa ja Vaalan lukiota**



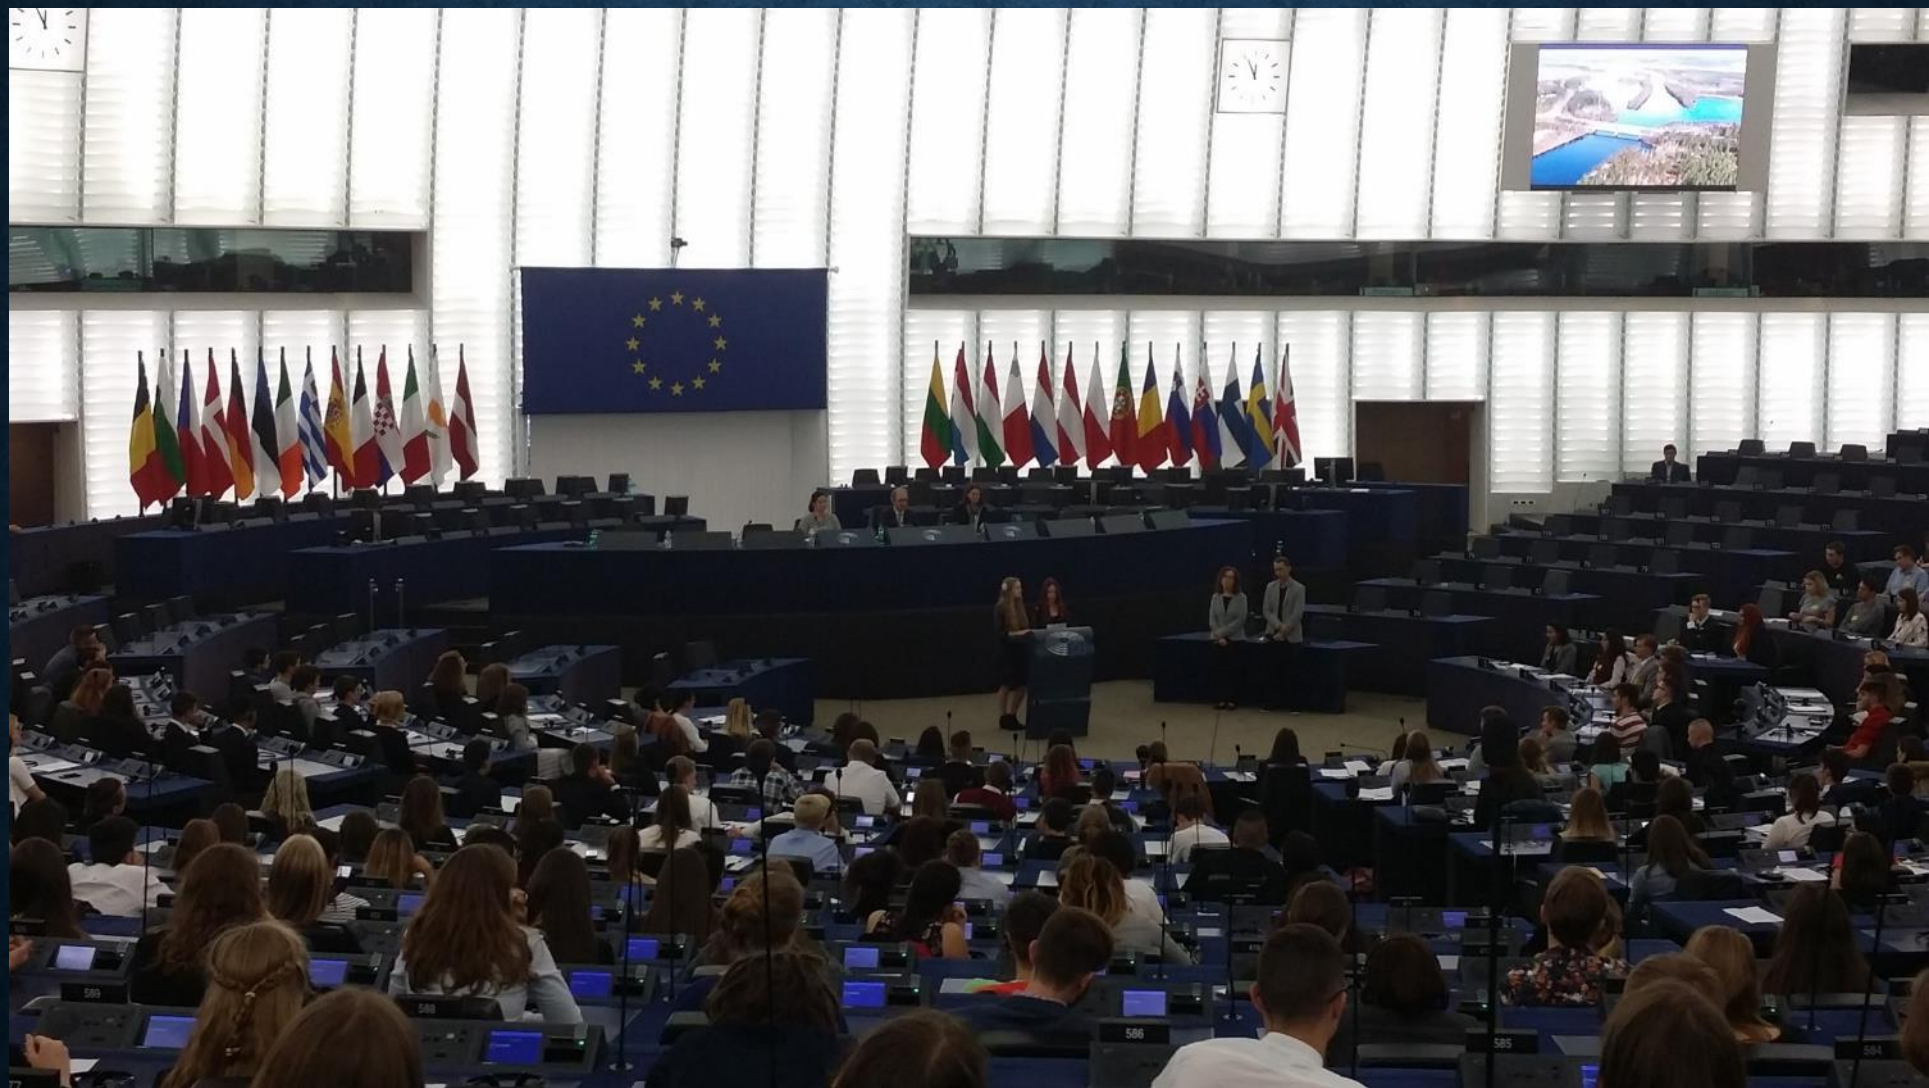



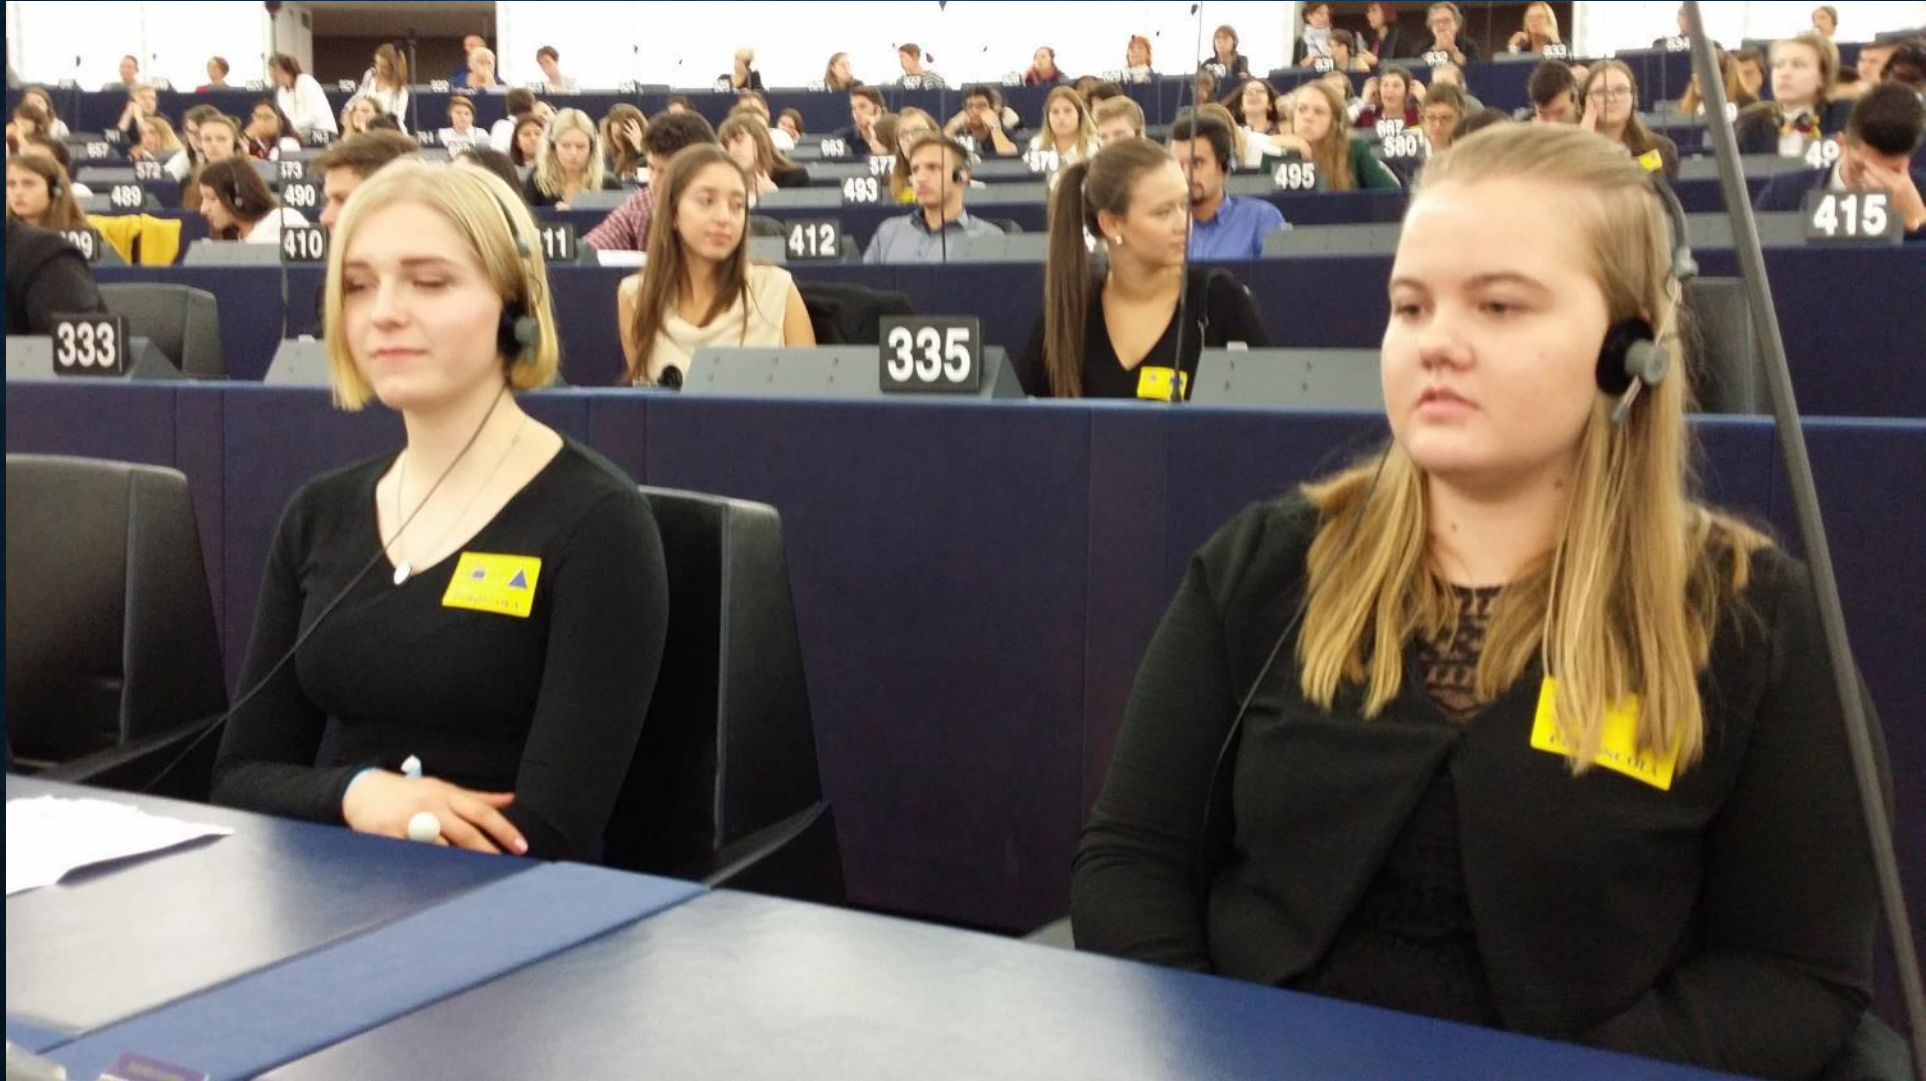

**Ilona ja Aino-Maija kuuntelevat tarkkaavaisina keskustelua**



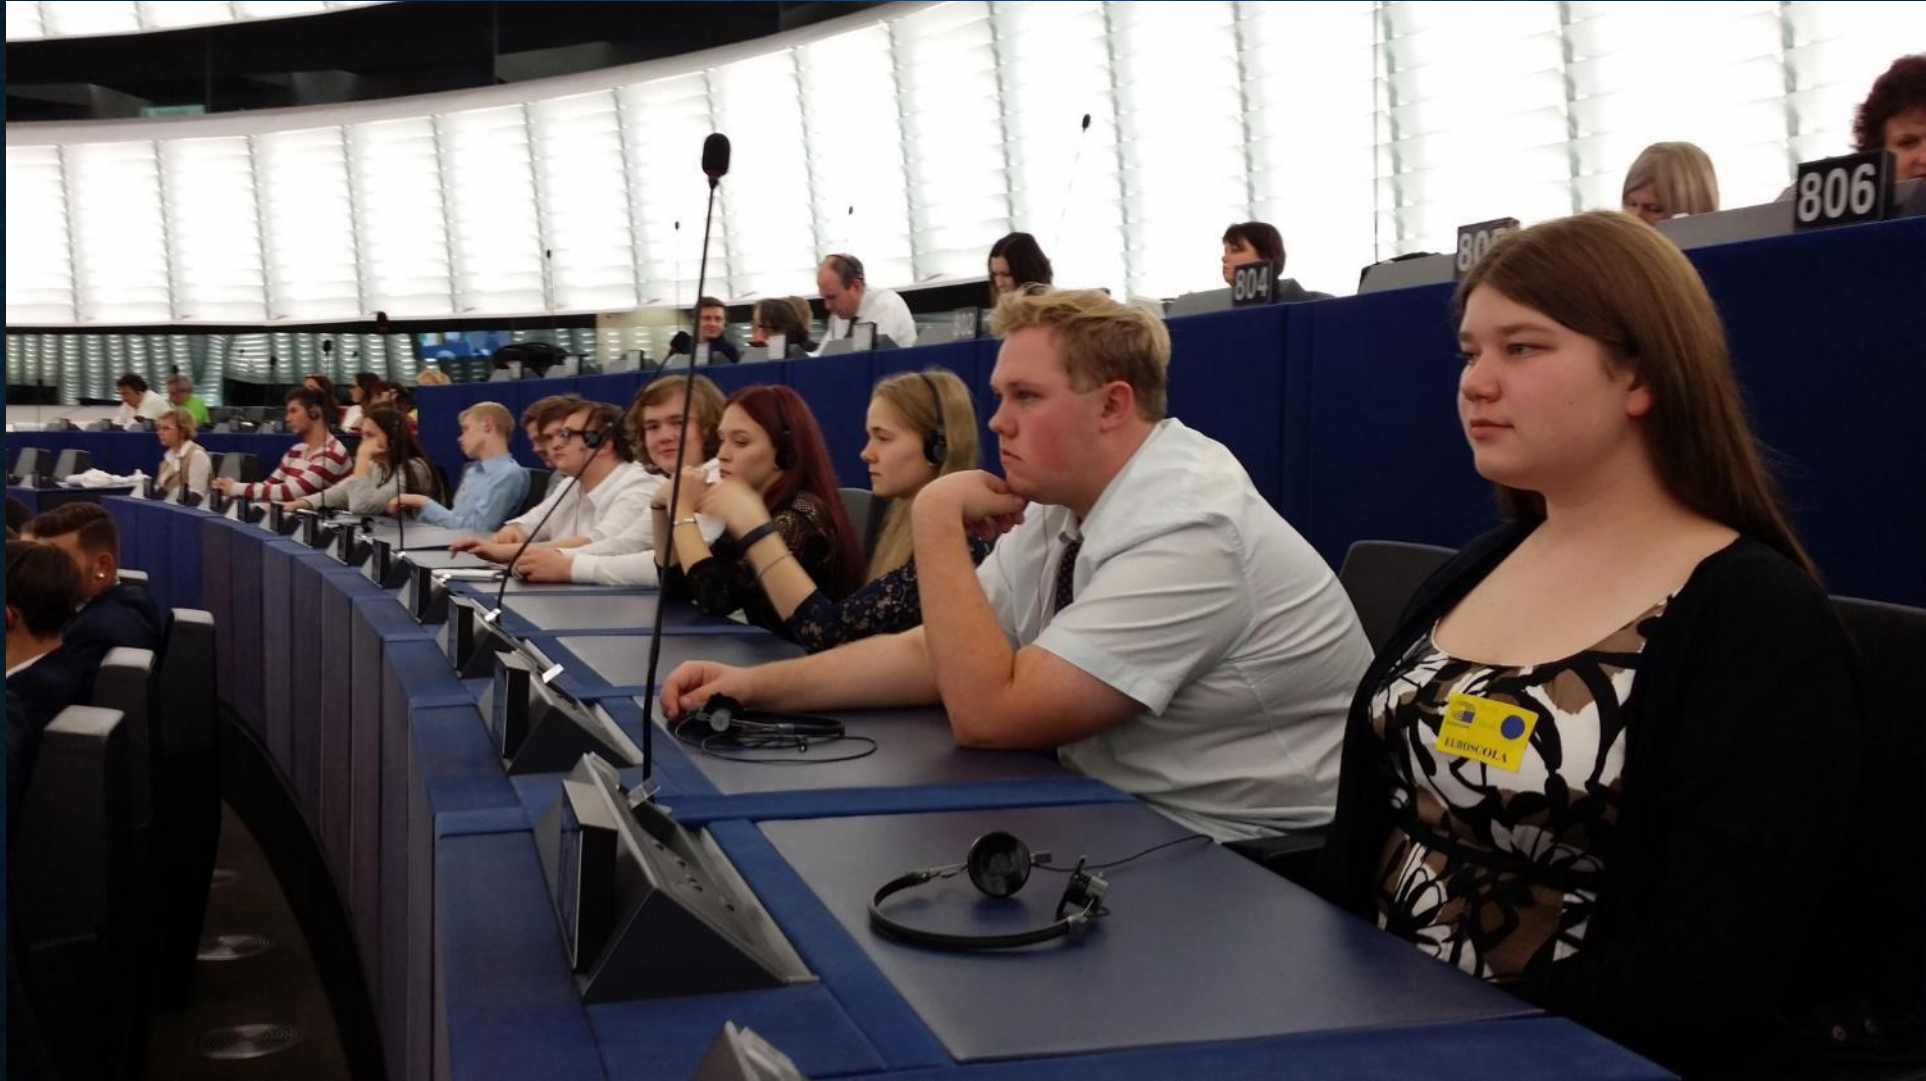

**Mahdollisia tulevia europarlamentaarikkoja  
lukioistamme**



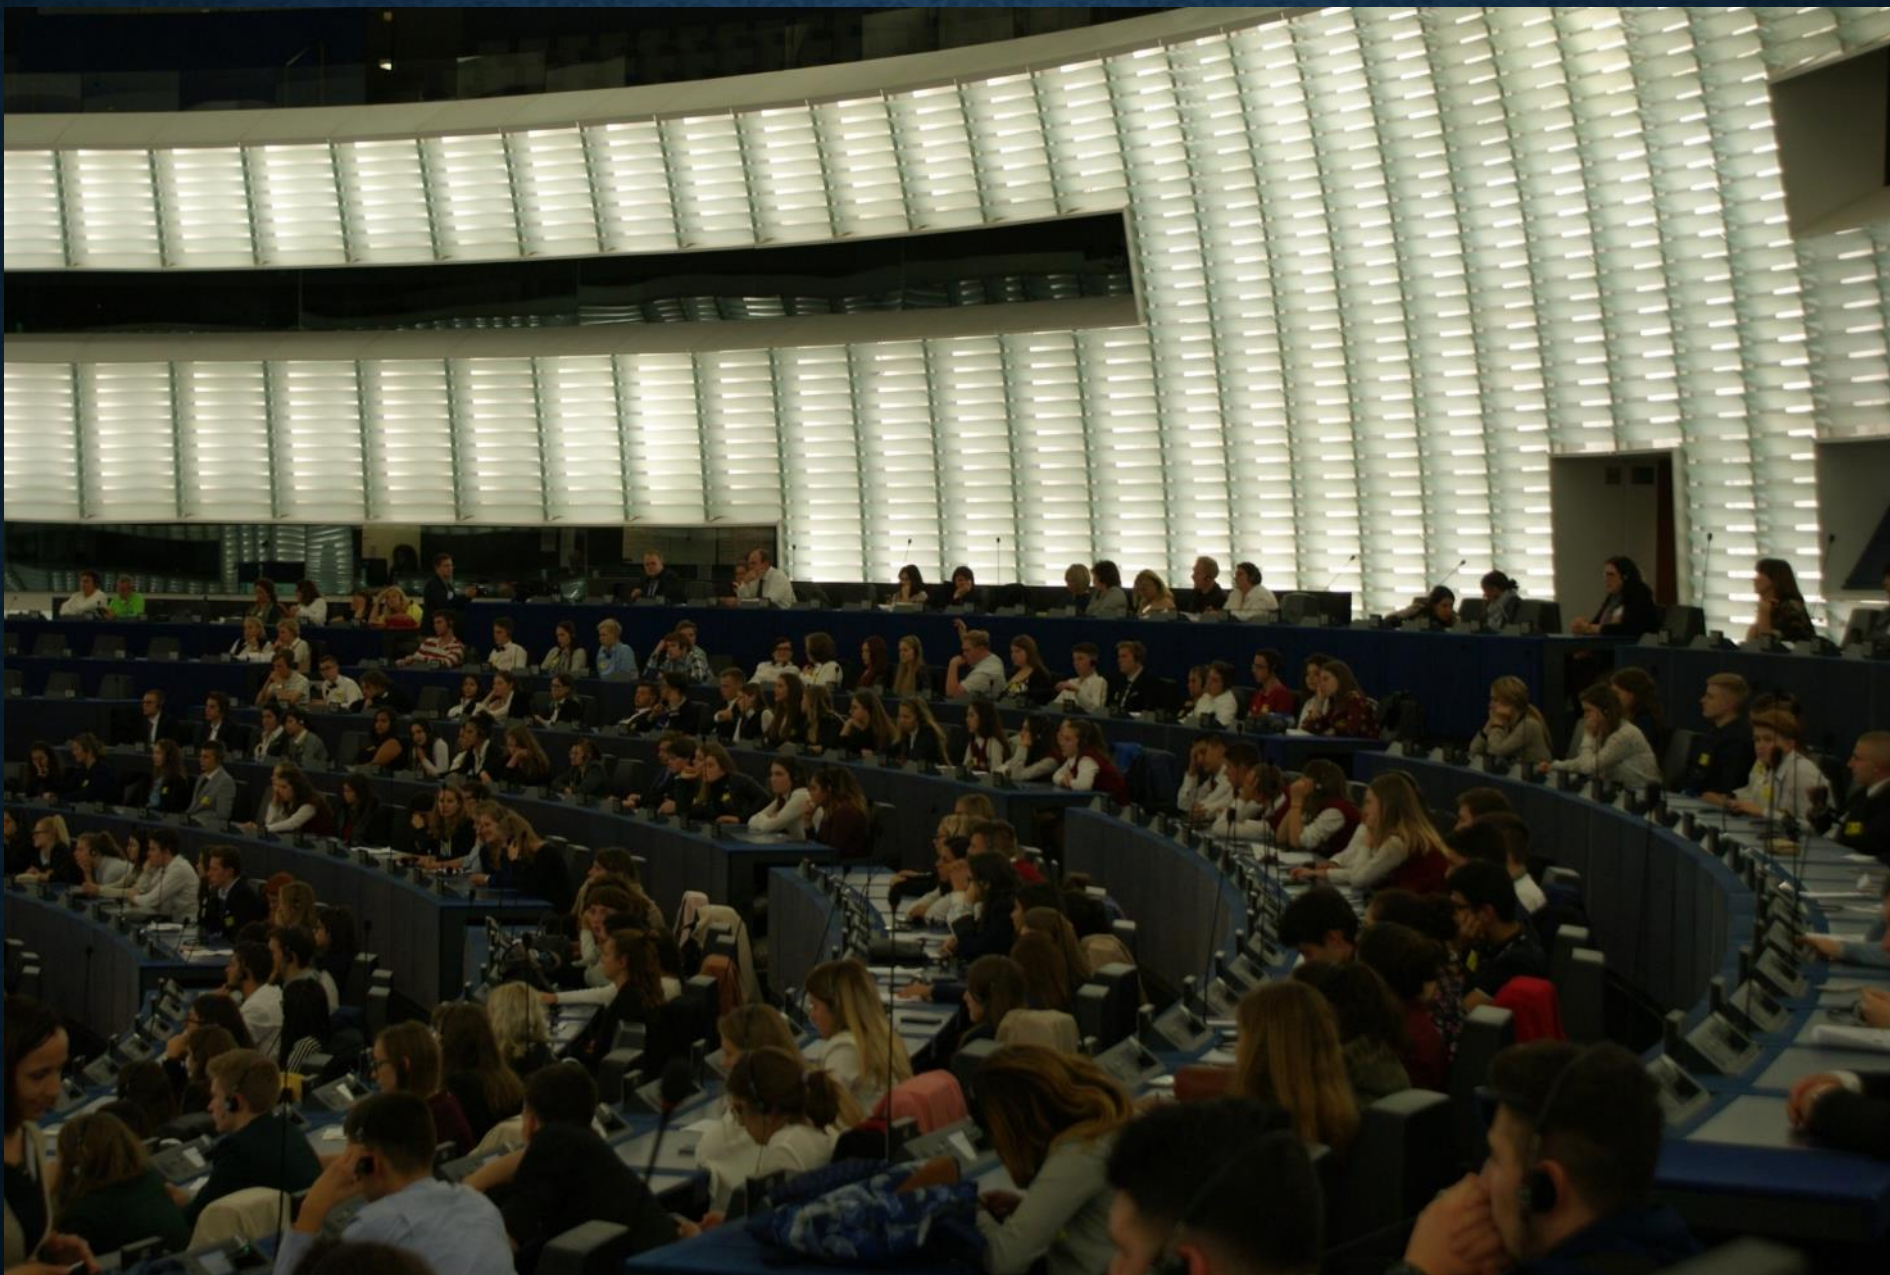

**Olli-Pekka pyytää puheenvuoroa**



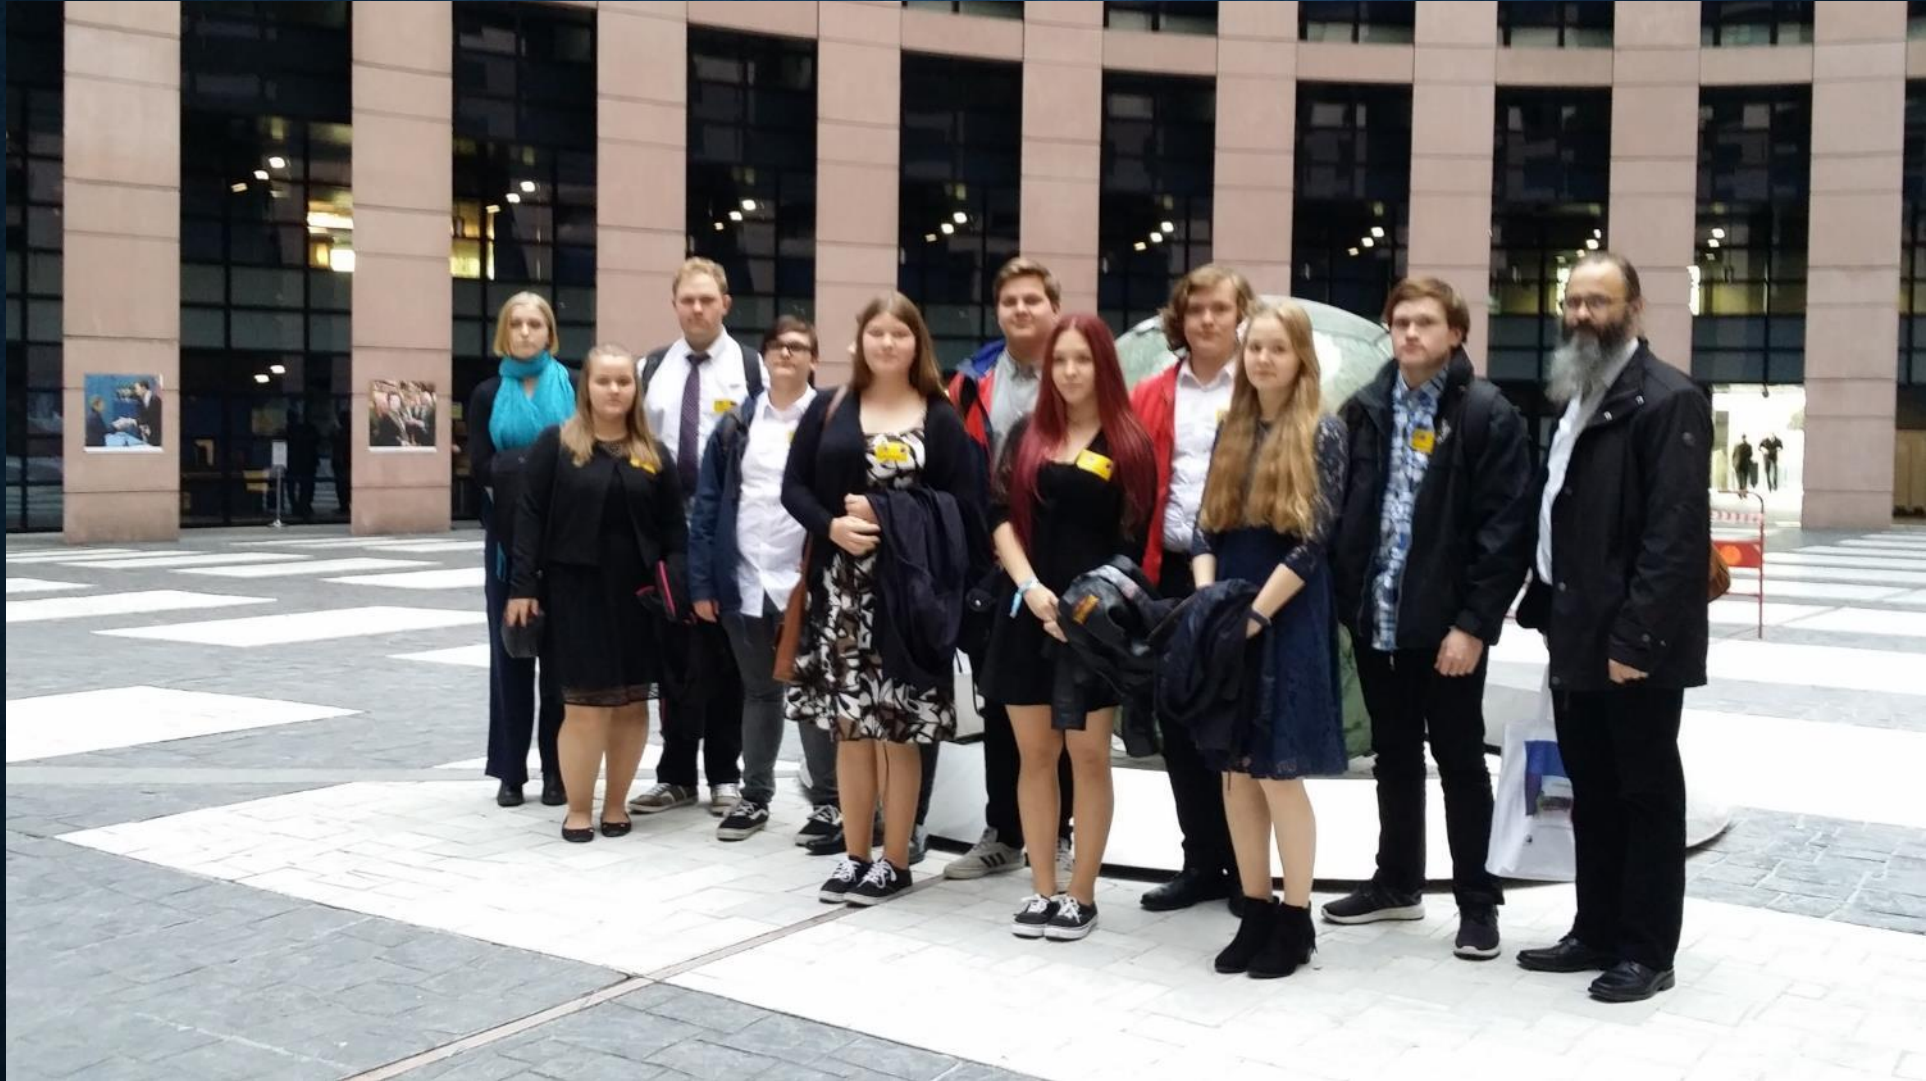

**Mukava ja ikimuistettava päivä**



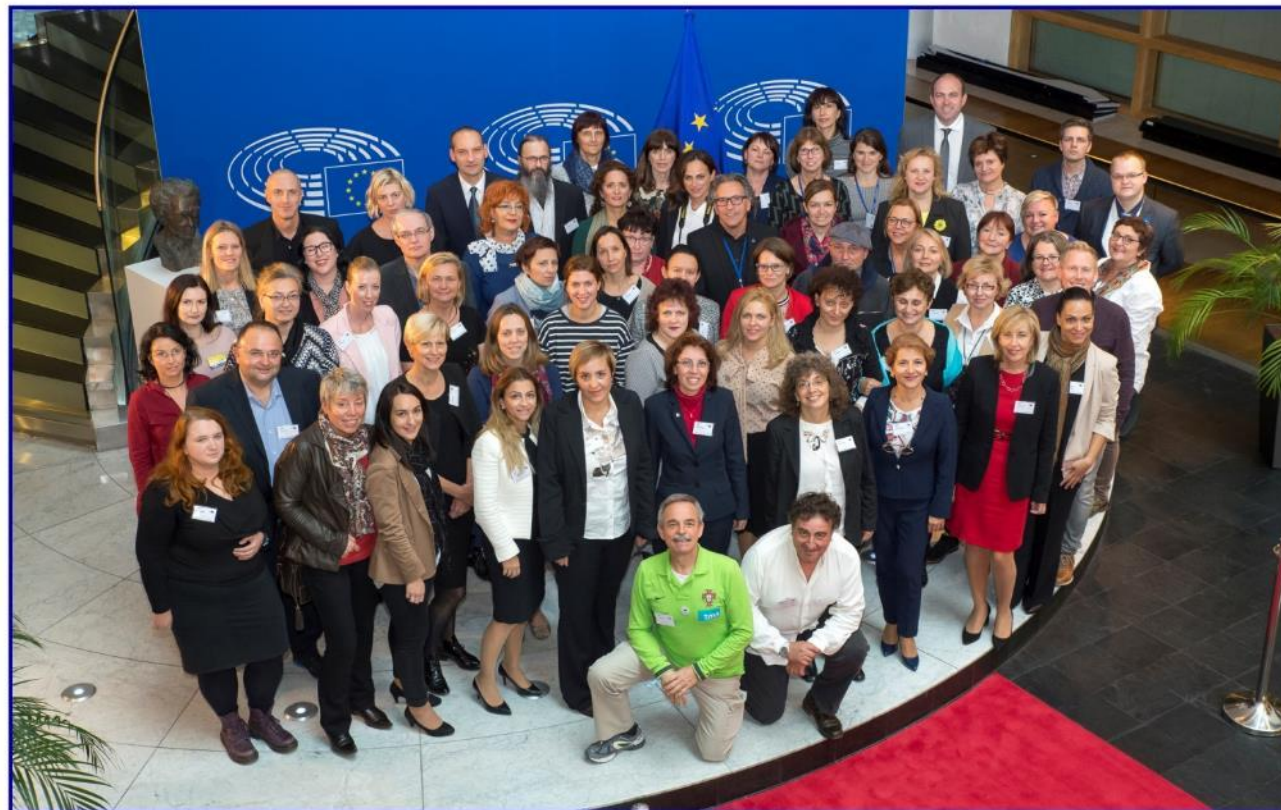

**EUROSCOLA DU 12 OCTOBRE 2017  
PARLEMENT EUROPÉEN À STRASBOURG**

**Opettajien virallinen valokuva; Riitta ja Jouni  
keskellä**



**Strasbourgissa  
13.10.2017**

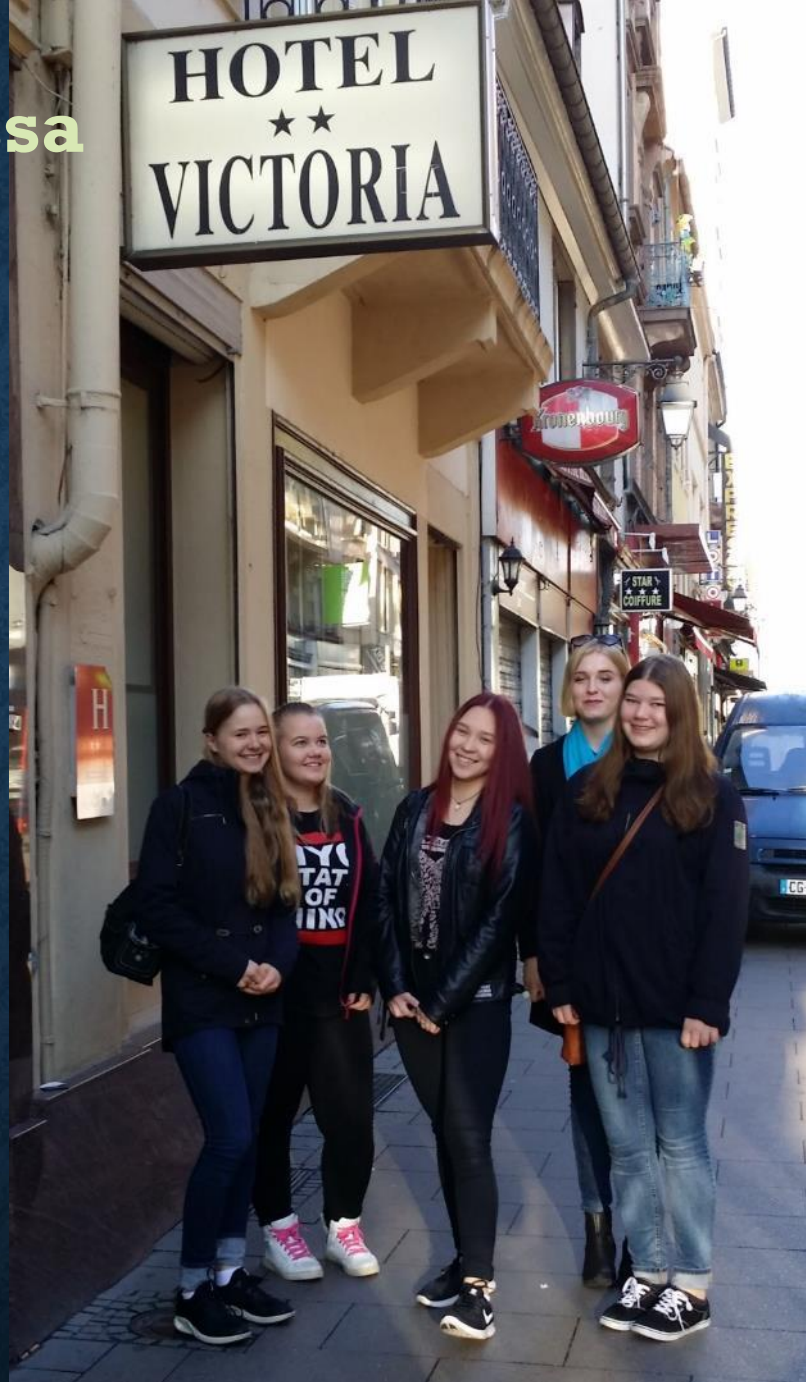

**Lähdössä tutustumaan Strasbourgin nähtävyyksiin**



**Ill-joki**

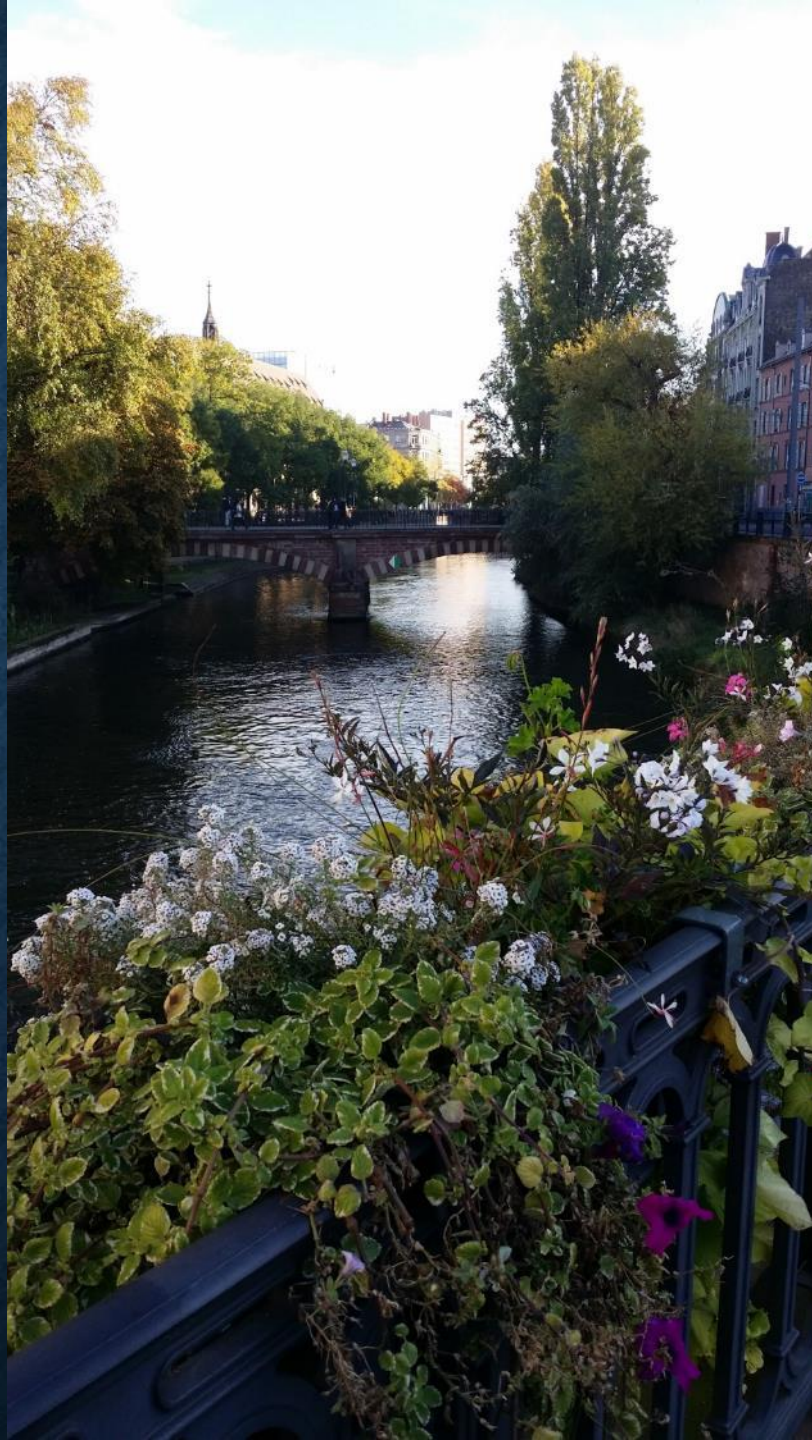



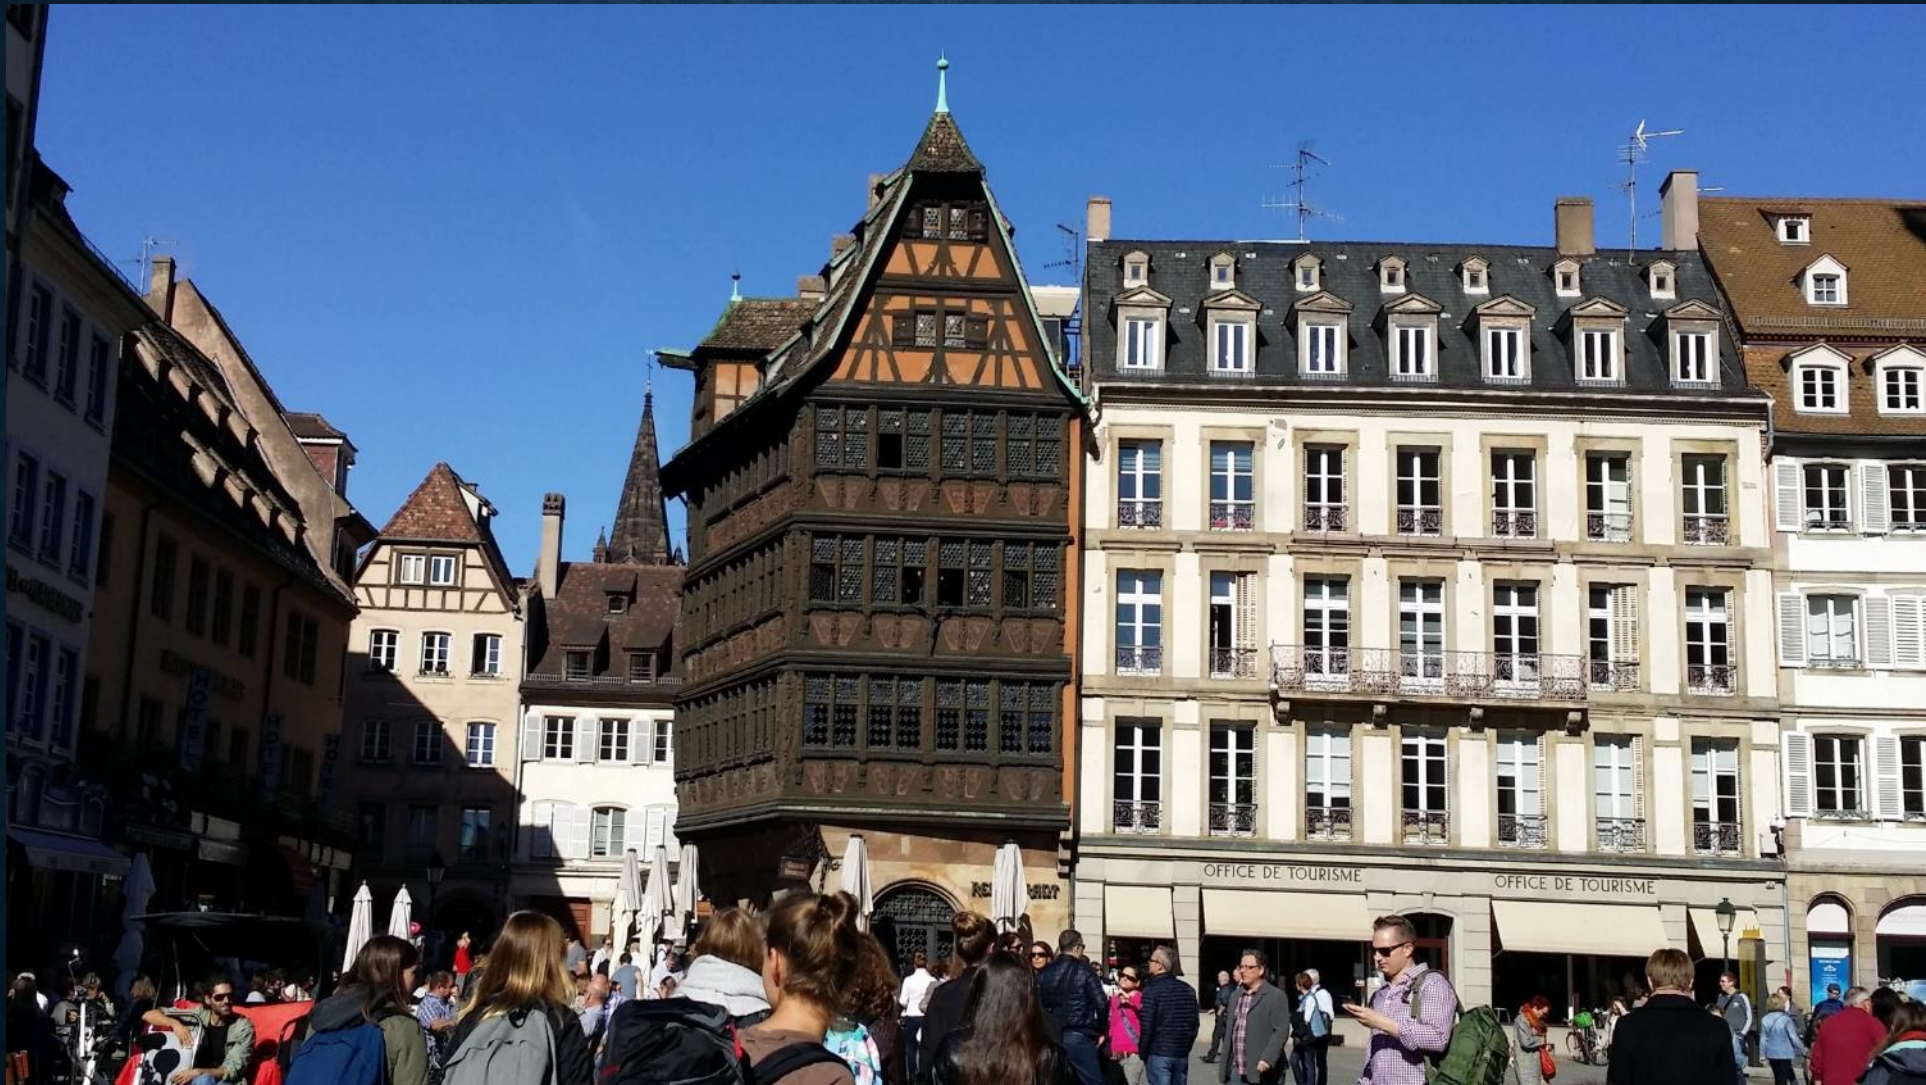

**Strasbourg tori Vanhassa kaupungissa;  
kuvassa kaupungin vanhin rakennus**



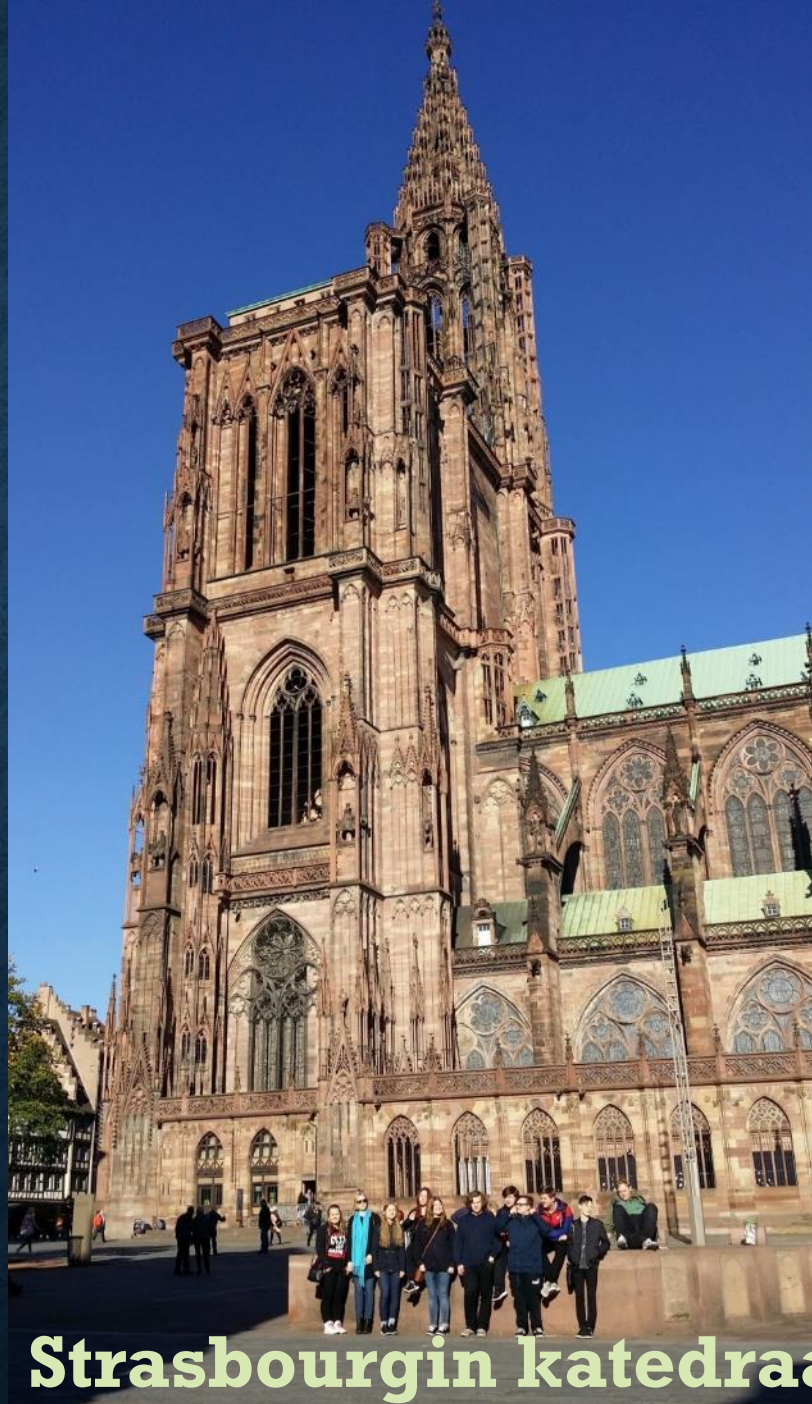

**Strasbourg katedraali**



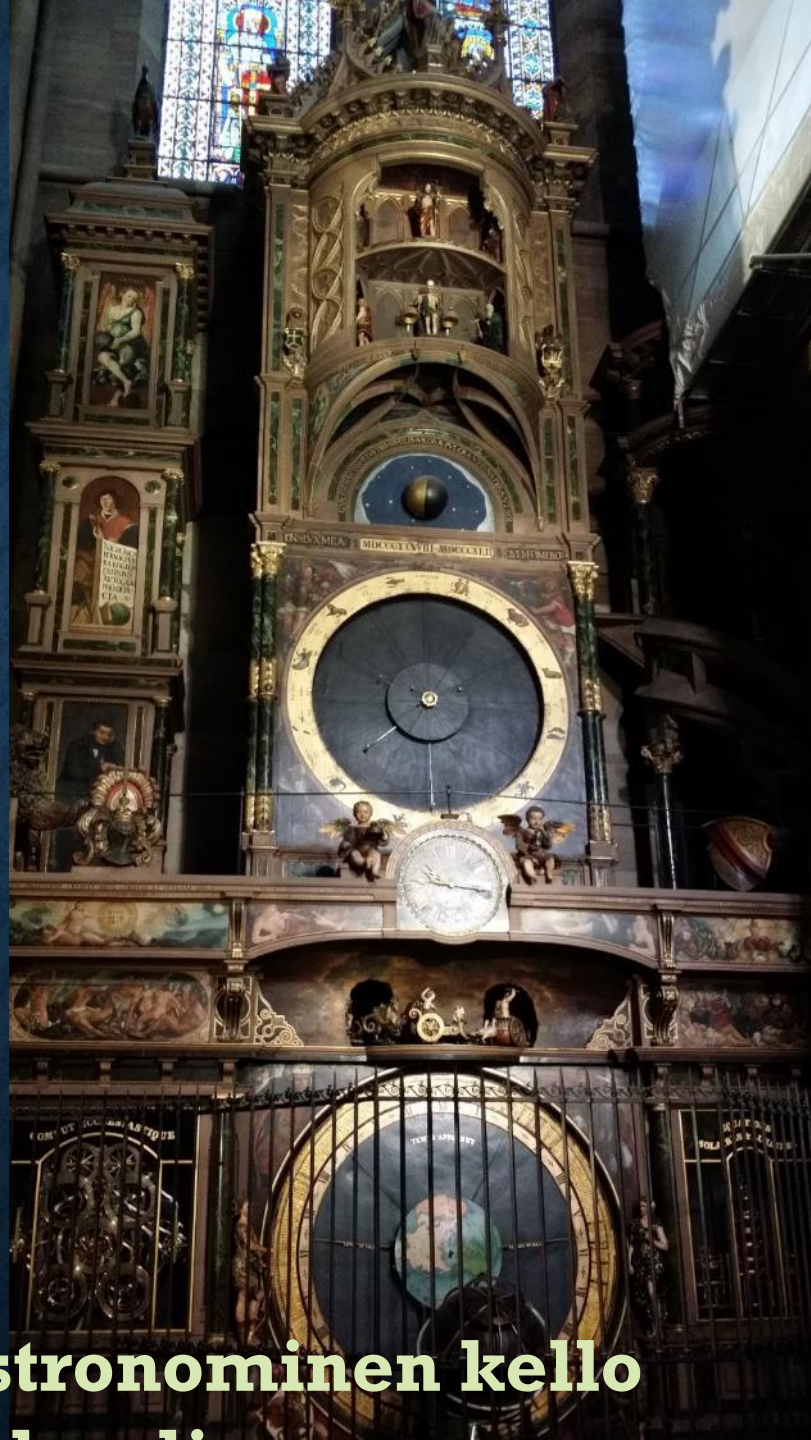

**Astronominen kello**



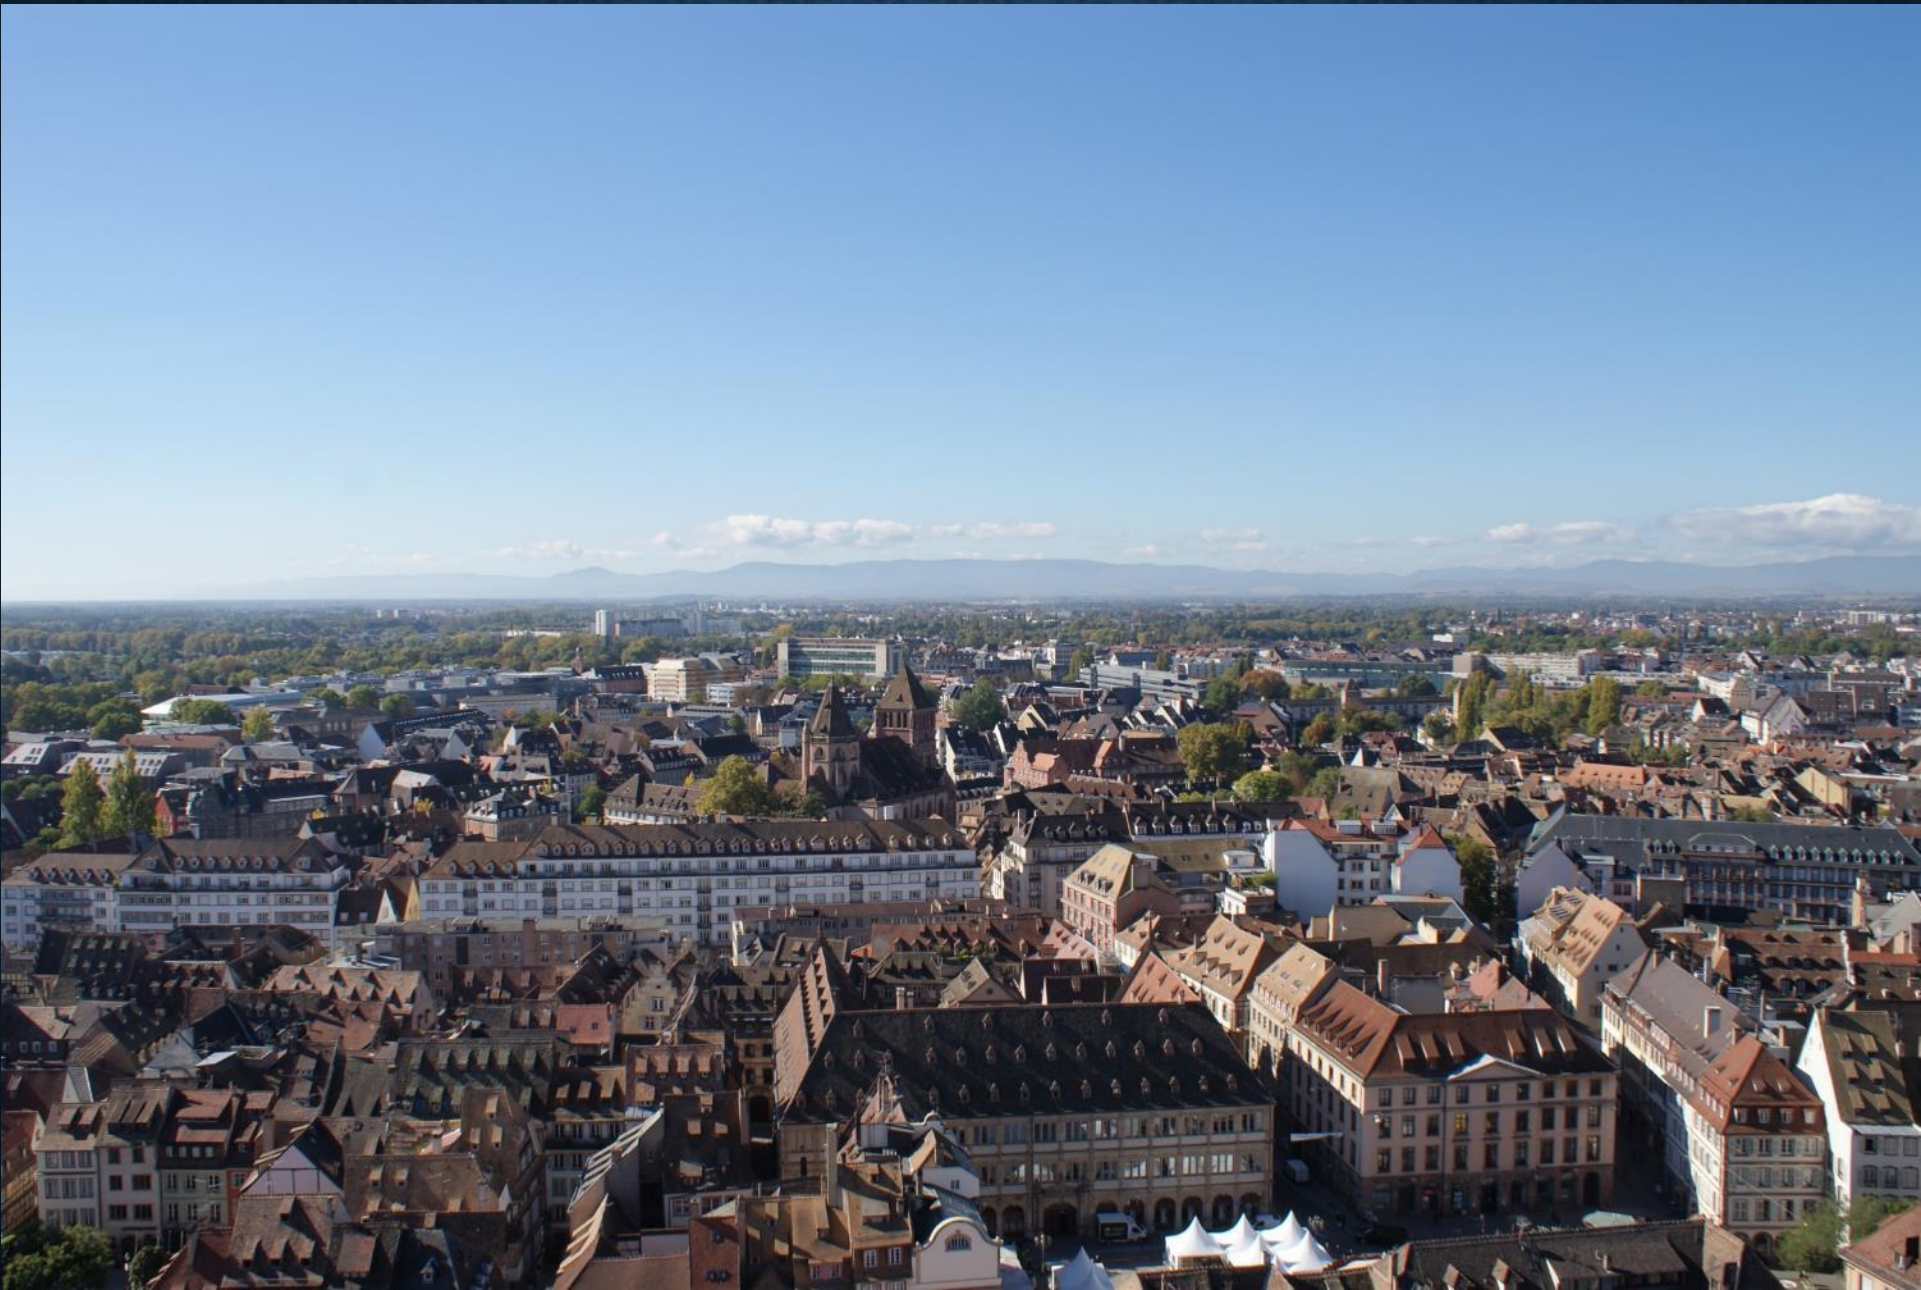

**Strasbourg katedraalin katolta kuvattuna**



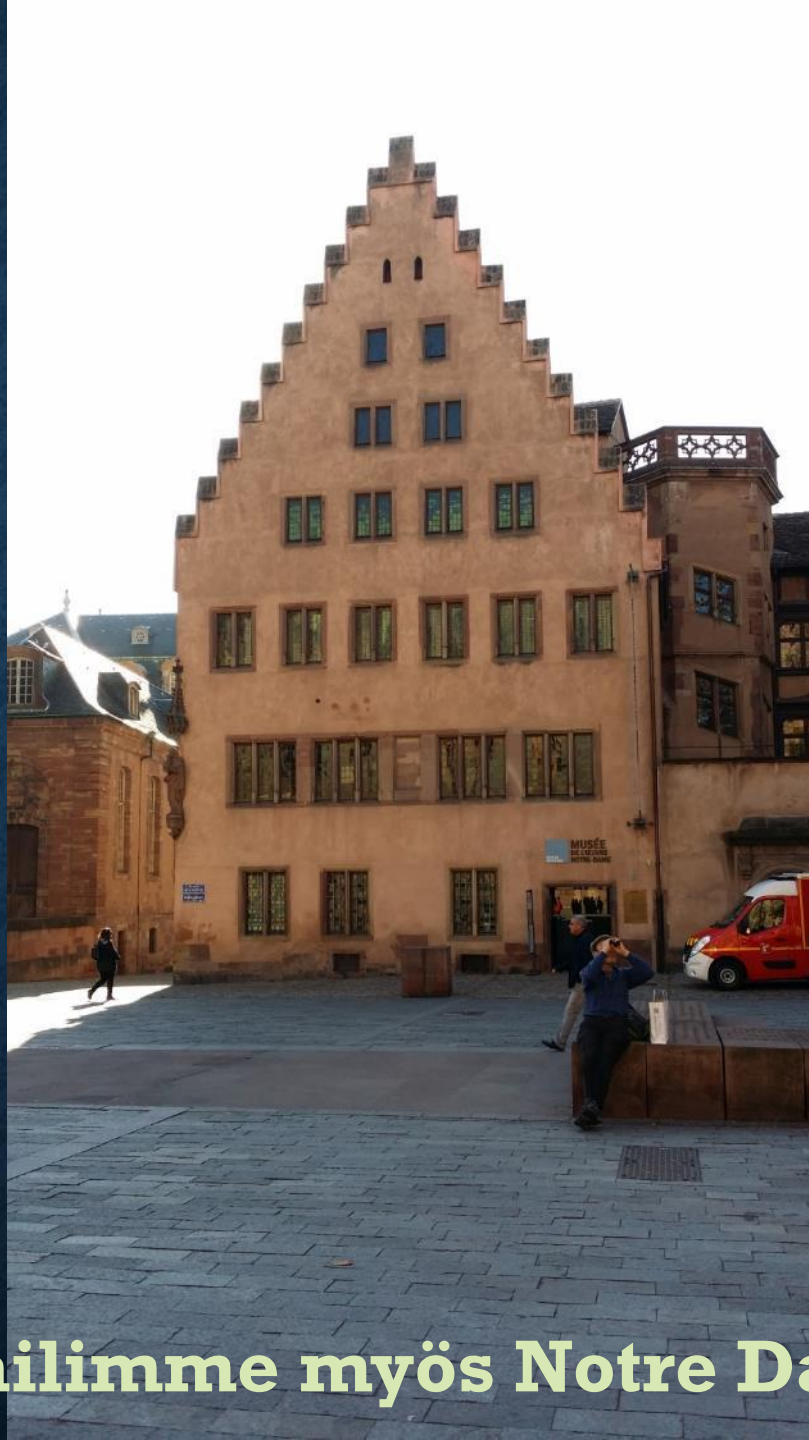

**Vierailimme myös Notre Dame-museossa**



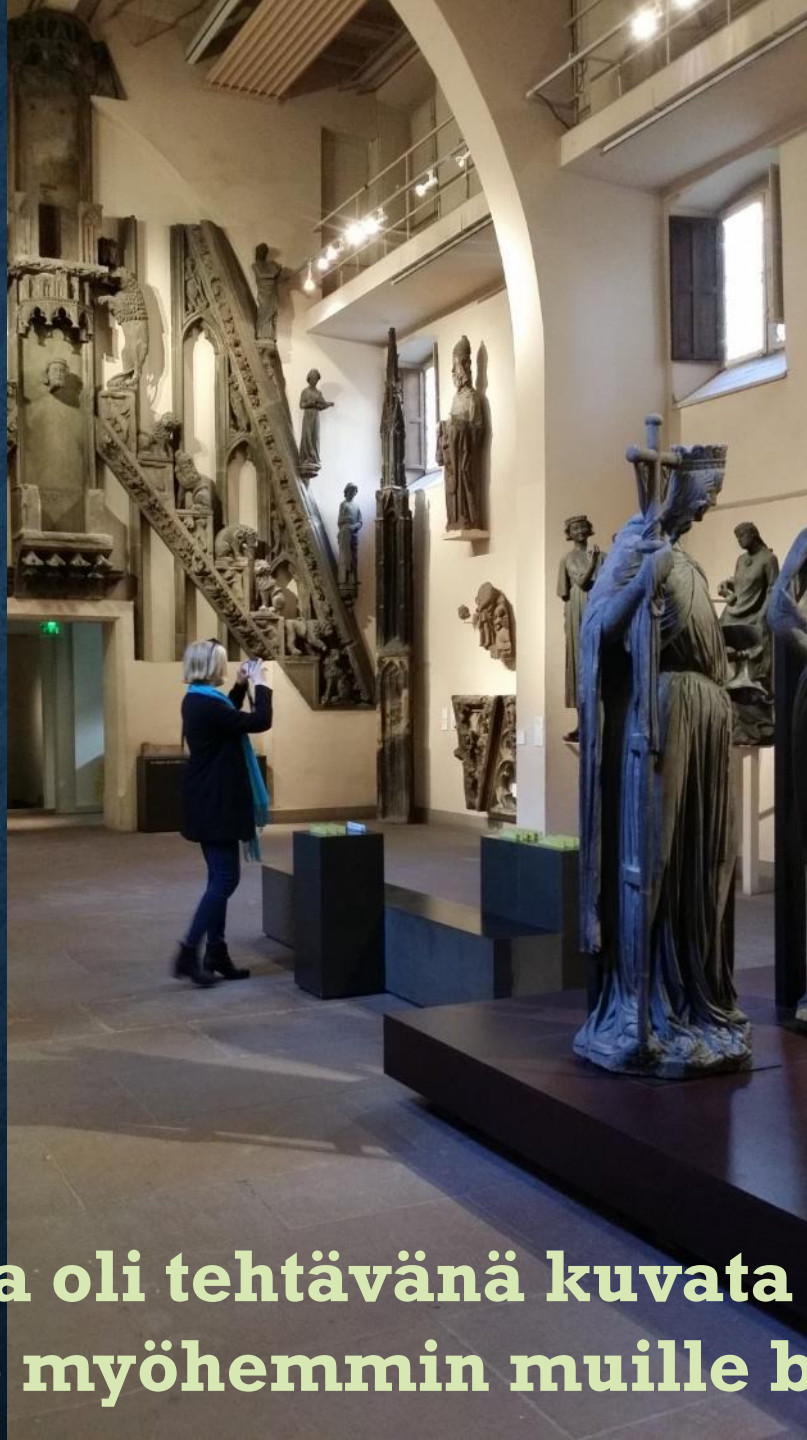

**Opiskelijoilla oli tehtävänä kuvata yksi kiinnostava kohde ja esitellä se myöhemmin muille blogissamme.**



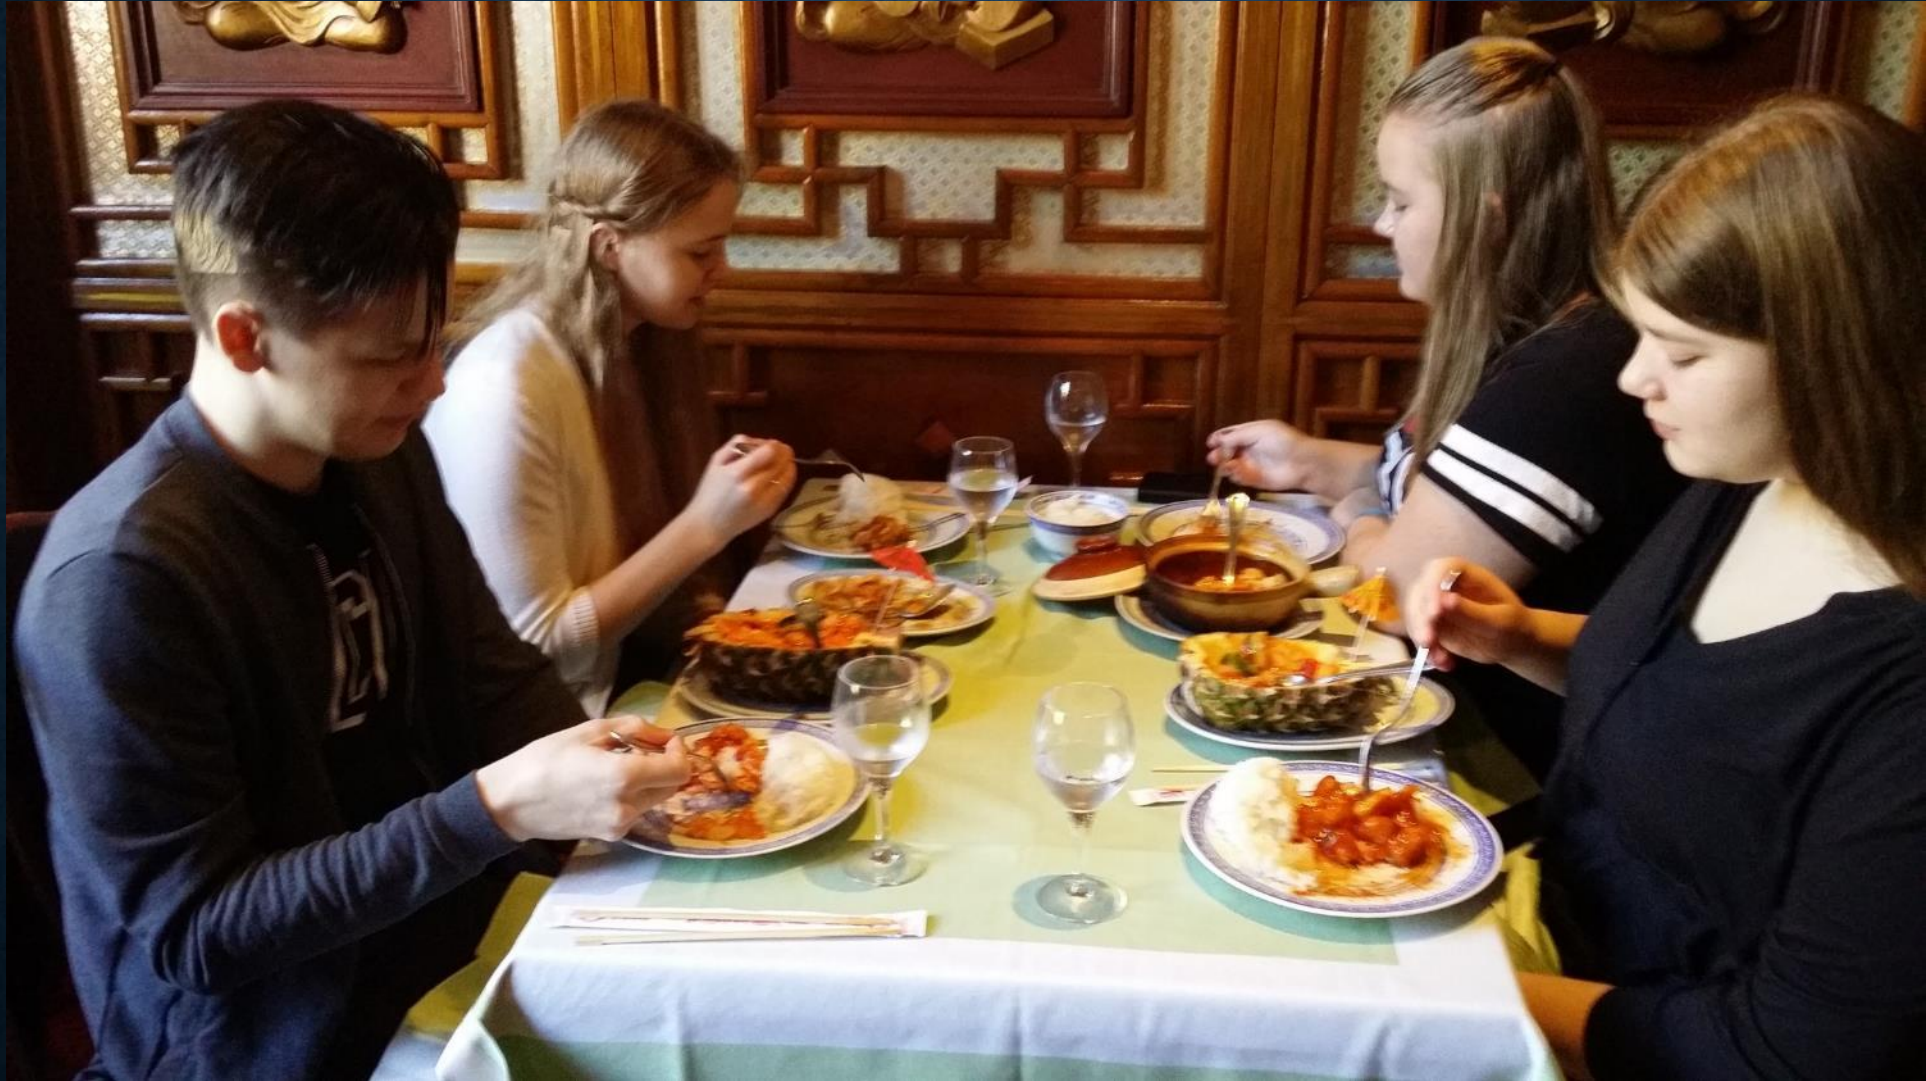

**Lounaalla kiinalaisessa ravintolassa**



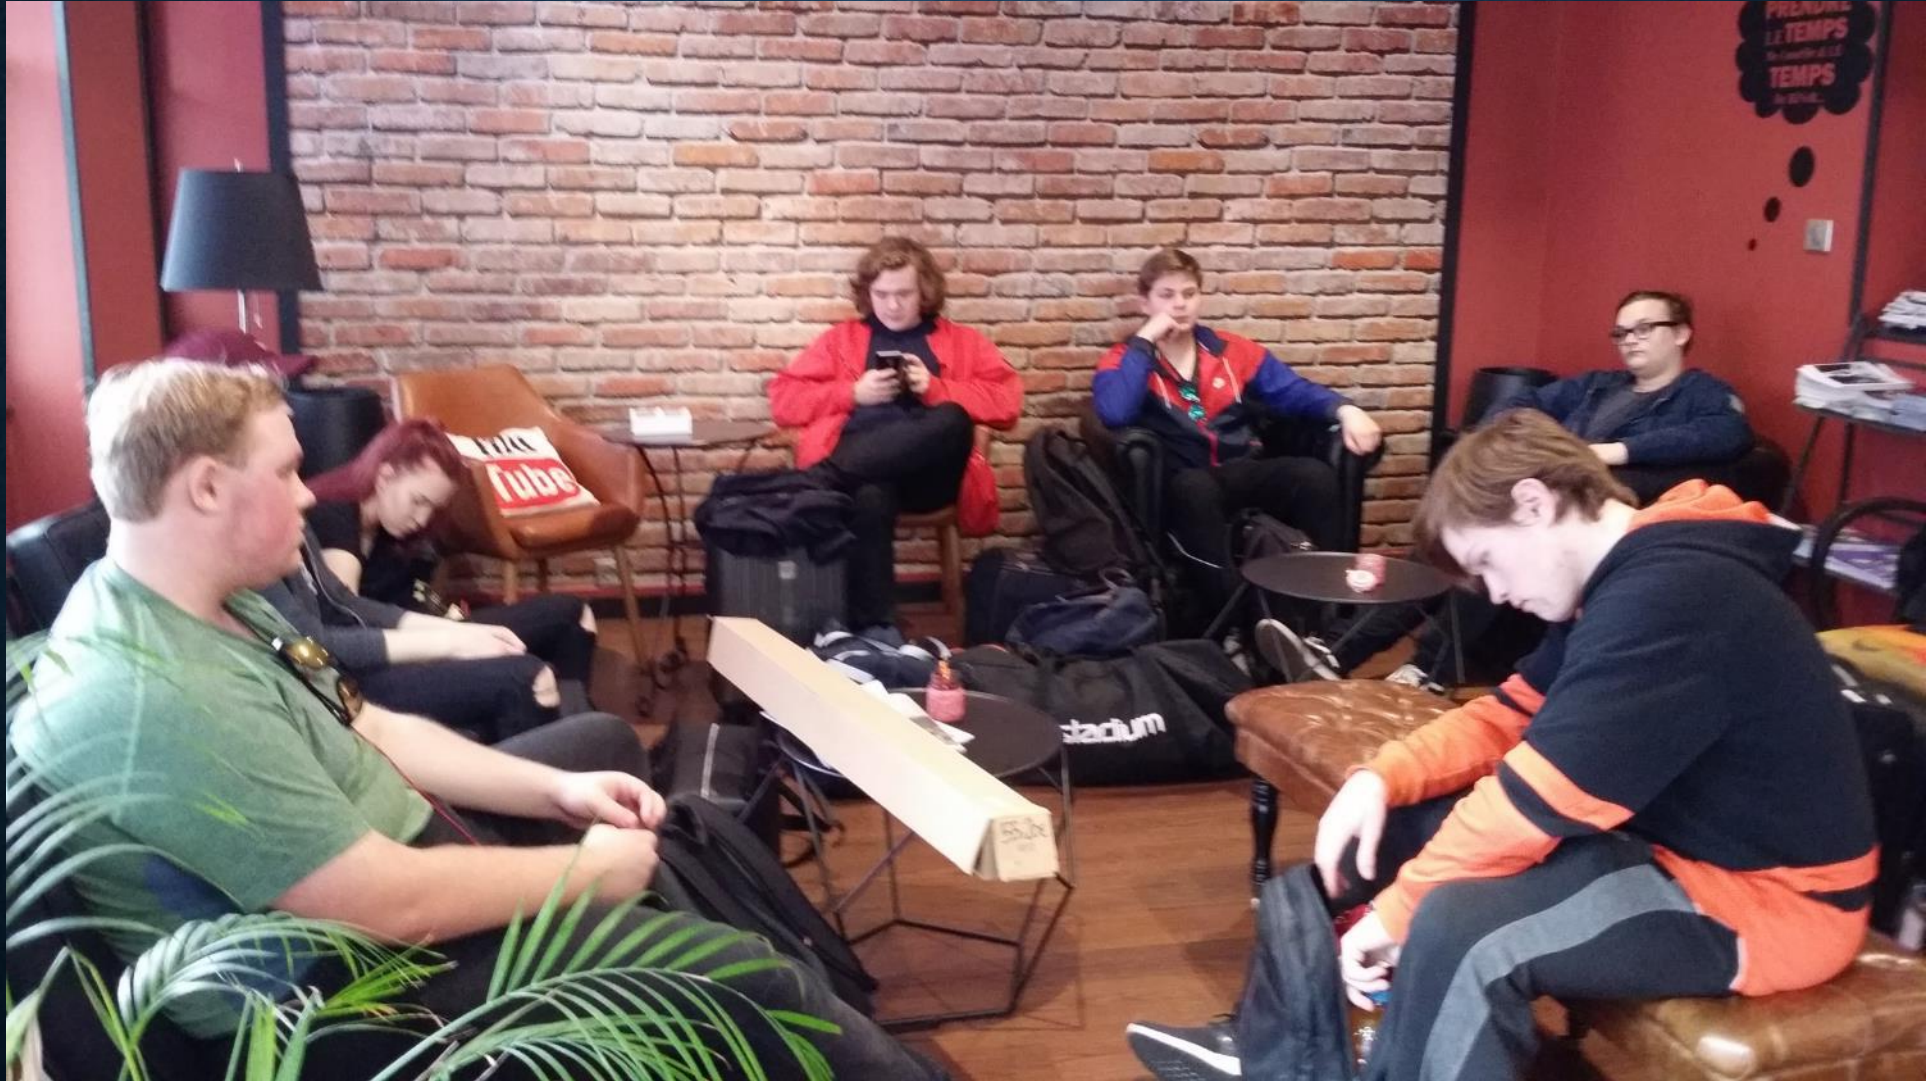

**Hotellihuoneiden luovutus. Kotimatka alkaa.**



# **Kuvat**

**Euroscola**

**Riitta Olsbo**

**Jouni Kauhanen**

**Tutustu myös blogiimme  
osoitteessa**

<https://euroscolavaala.wordpress.com/>
