# Supplementary material
Source: MDPI journal article supplement (https://www.mdpi.com/2571-9408/5/2/38)
Supplement: s1 [file s1]

# ICE AND SNOW MEASUREMENTS

Anni Karppinen, Sanni Kurkinen,  
Juho Virkkunen, Topi Honkonen

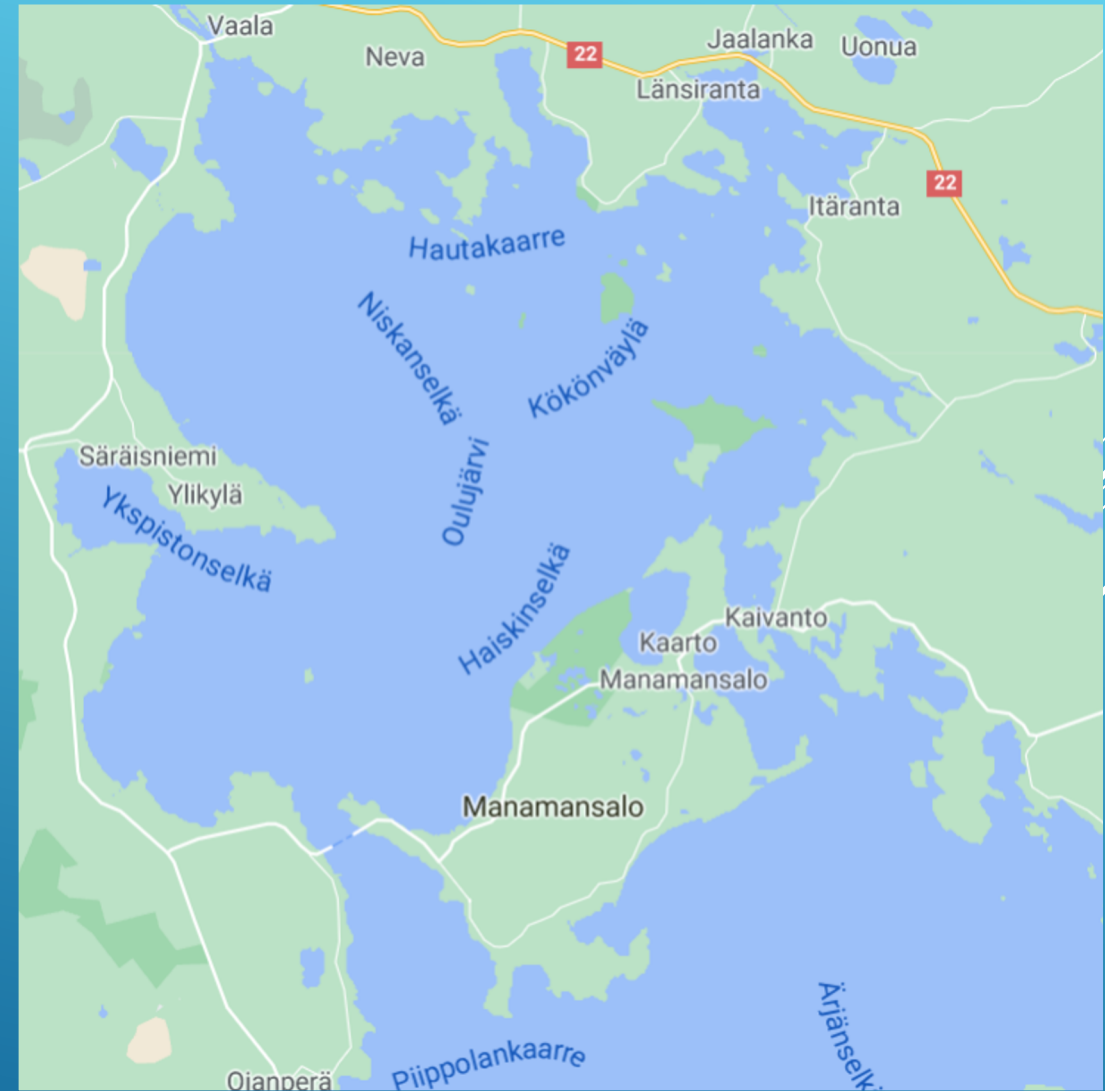

# APPARENT TRENDS IN ICE CAP TIME

## **As a result of climate change:**

- ice melts earlier than before
- water freezes later
- ice thickness thinner than before

Minimum ice thickness: 23 cm

Maximum ice thickness: 66 cm

Average ice thickness: 42 cm

The largest measured ice thickness:  
76 cm (10.4.1985)

|           | freezing | breaking up of ice | duration of ice cover |
|-----------|----------|--------------------|-----------------------|
| 1854-2020 | 18.11    | 23.5               | 186                   |
| 1961-2000 | 20.11    | 22.5               | 183                   |
| 2000-2020 | 1.12     | 12.5               | 162                   |

# WHY IS IT IMPORTANT TO HAVE LONG TERM DATA SERIES ON NATURAL PROCESSES?

Some winters are colder than others, that's why the measured values change every year.

Reliable data is obtained if findings are collected for several years → average

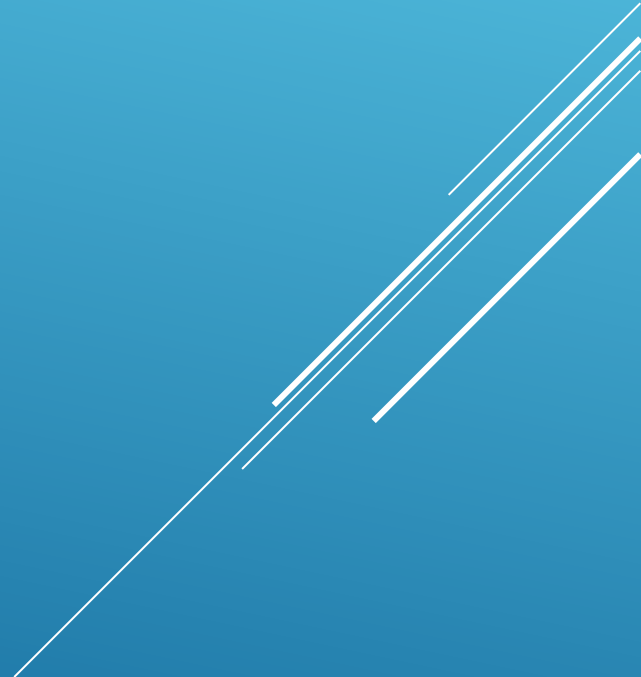

# WHAT KIND OF CONSEQUENCES MIGHT THE CHANGES IN SNOW COVER AND LAKE ICE HAVE IN OUR HOME REGION IN THE FUTURE?

Snow protects plants from frost damage in the winter

Some animals need snow during winters

Without snow:

- animals' camouflage will disappear
- Saimaa ringed seal will become extinct
- the birds don't get into the snow nest

Without lake ice:

- winter sports wouldn't be possible, for example skating on lake ice
- harm for certain animal species

# SNOW AND ICE MEASUREMENTS IN KAIVANTO, MANAMANSALO

| All measurements (cm) | Minimum | Maximum | Average |
|-----------------------|---------|---------|---------|
| Snow depth            | 17      | 20      | 18      |
| Snow water equivalent |         |         |         |
| Bright ice            | 6       | 13      | 9       |
| Porous ice            | 18      | 20      | 19      |
| Total thickness       | 26      | 31      | 28      |

# SNOW MEASUREMENTS IN MARTINLAHTI, MANAMANSALO

| Point 2, land             | Minimum | Maximum | Average |
|---------------------------|---------|---------|---------|
| Snow depth (cm)           | 32      | 35      | 33      |
| Snow water equivalent (g) | 475     | 575     | 520     |

| Point 4, lake             | Minimum | Maximum | Average |
|---------------------------|---------|---------|---------|
| Snow depth (cm)           | 15      | 20      | 17      |
| Snow water equivalent (g) | 205     | 275     | 240     |

# ICE MEASUREMENTS IN MARTINLAHTI, MANAMANSALO

| Measurements (cm) | Point 2 average | Point 3 average |
|-------------------|-----------------|-----------------|
| Snow depth        | 20              | 21              |
| Bright ice        | 20              | 20              |
| Porous ice        | 25              | 17              |
| Total thickness   | 45              | 37              |
