# Supplementary material
Source: MDPI journal article supplement (https://www.mdpi.com/2571-9408/5/2/38)
Supplement: s1 [file s1]

Archive with 4 entries (4 files):
- heritage-1608811-supplementary-SF1.pdf
- heritage-1608811-supplementary-SF2.pdf
- heritage-1608811-supplementary-SF3.pdf
- heritage-1608811-supplementary-SF4.pdf
