# Supplementary material
Source: MDPI journal article supplement (https://www.mdpi.com/2571-9408/5/2/38)
Supplement: s1 [file s1 › heritage-1608811-supplementary-SF3.pdf]

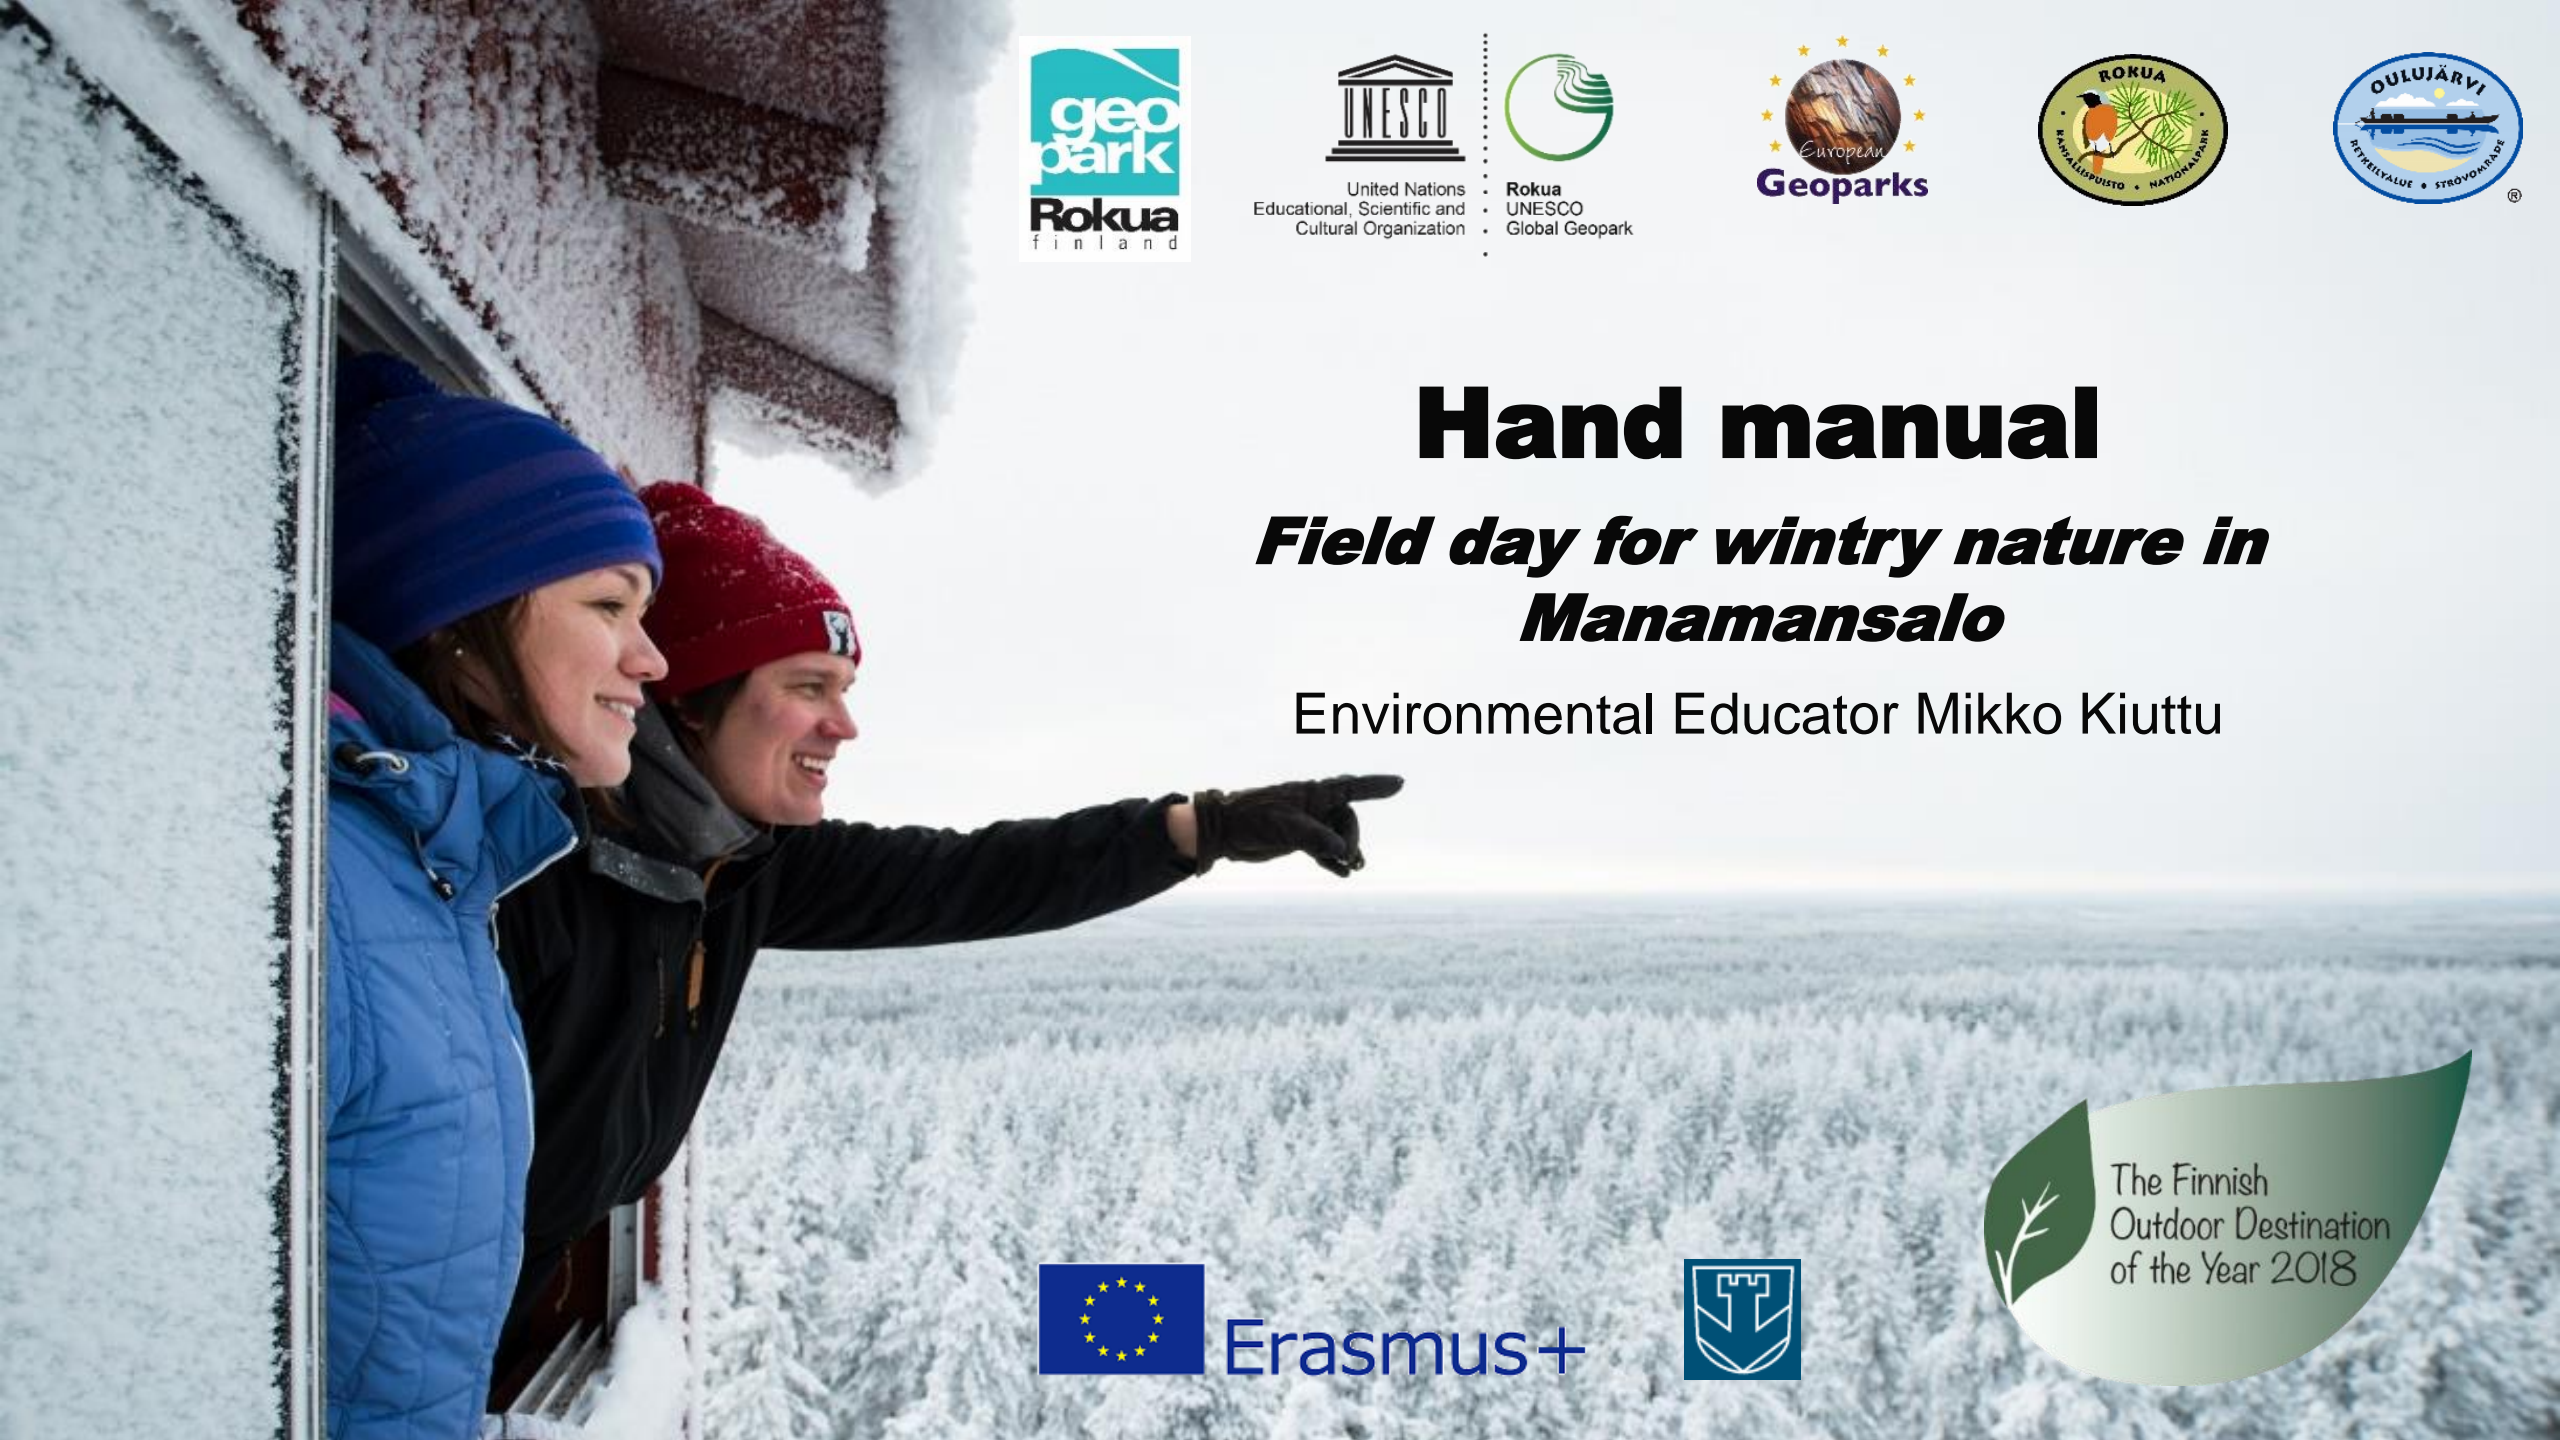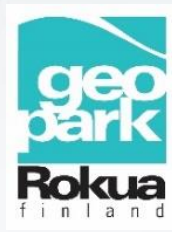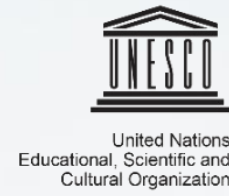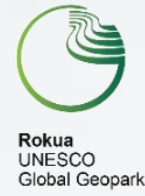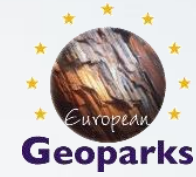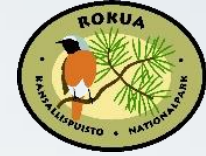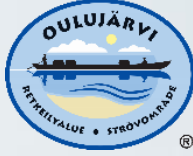

# Hand manual

## *Field day for wintry nature in Manamansalo*

Environmental Educator Mikko Kiuttu

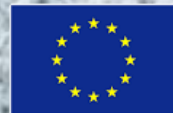

Erasmus+

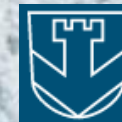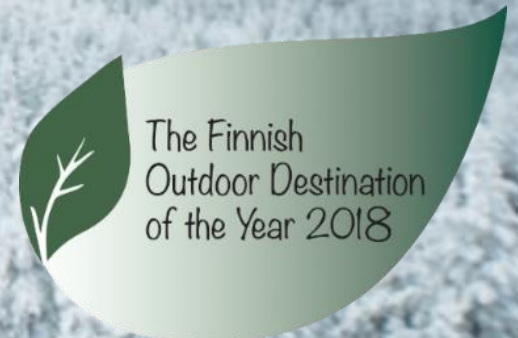

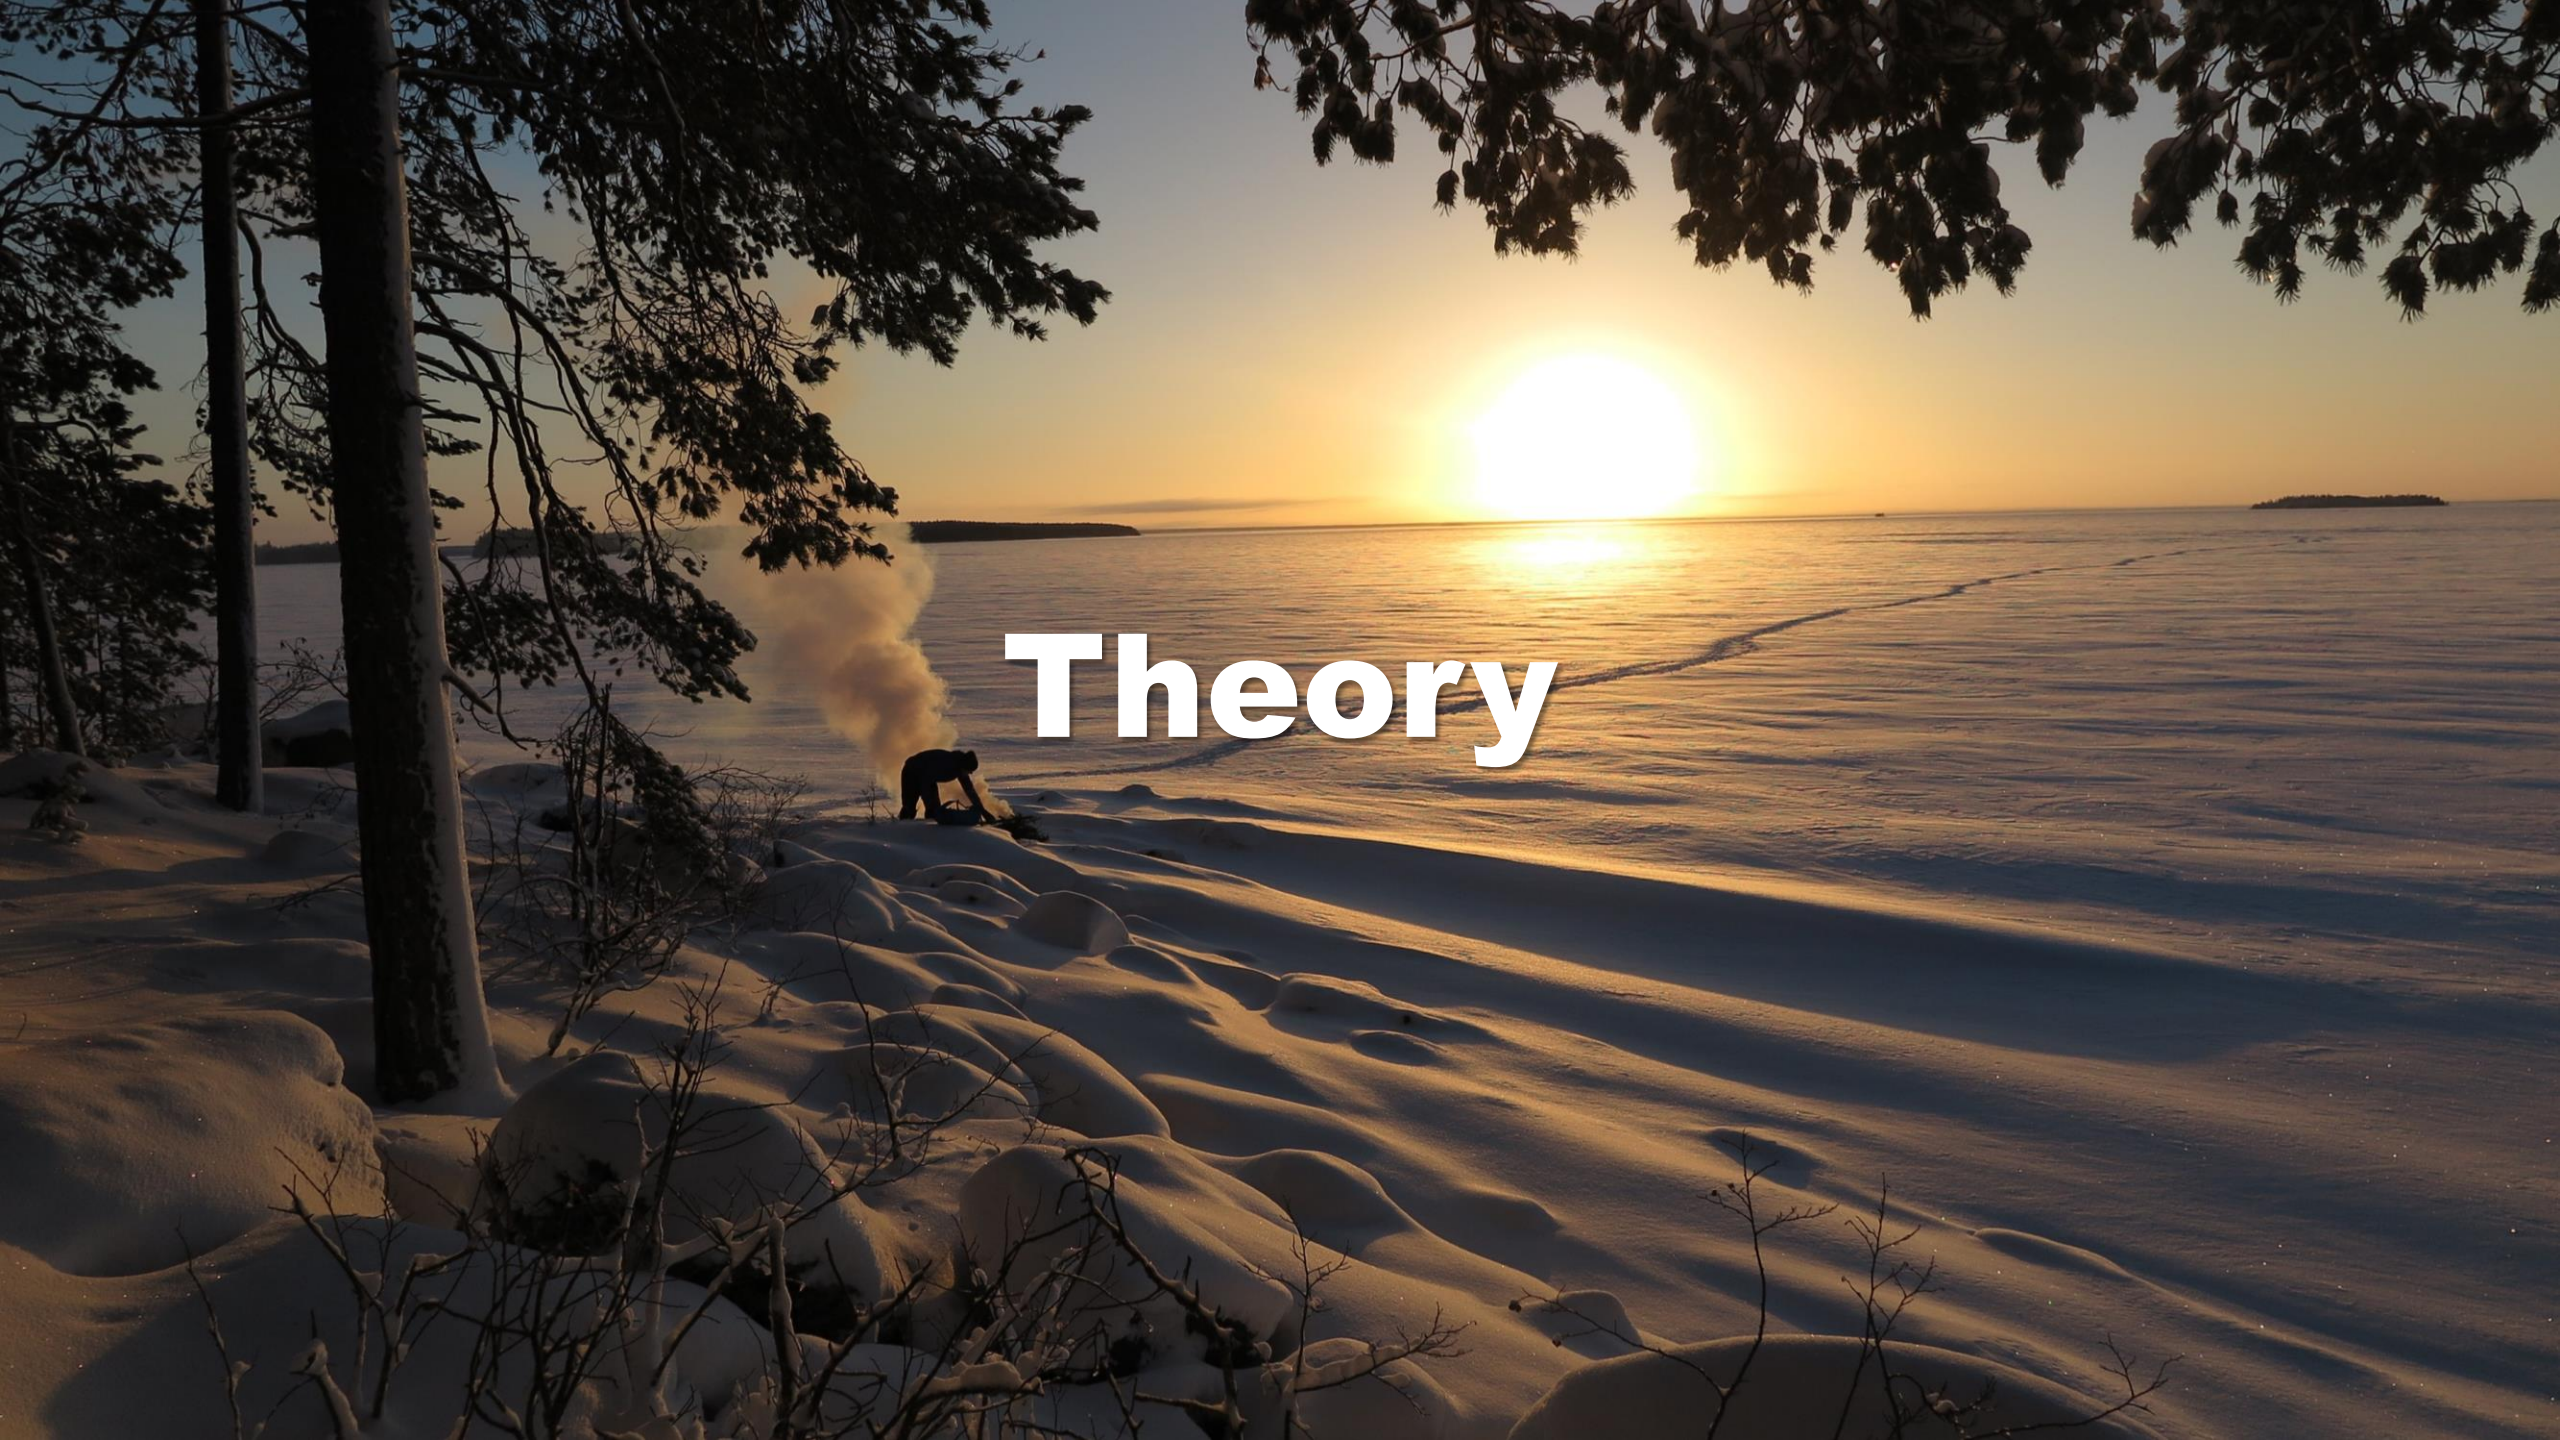A serene winter scene at sunset. A person is crouched on a snow-covered beach, building a fire. A plume of white smoke rises from the fire. The sun is a bright, glowing orb on the horizon, casting a golden light across the water and snow. The sky is a mix of orange and blue. In the foreground, there are snow-covered dunes and the dark silhouettes of trees. The word "Theory" is written in a large, white, sans-serif font across the middle of the image.

# Theory

# Average climate in Finland 1981-2010

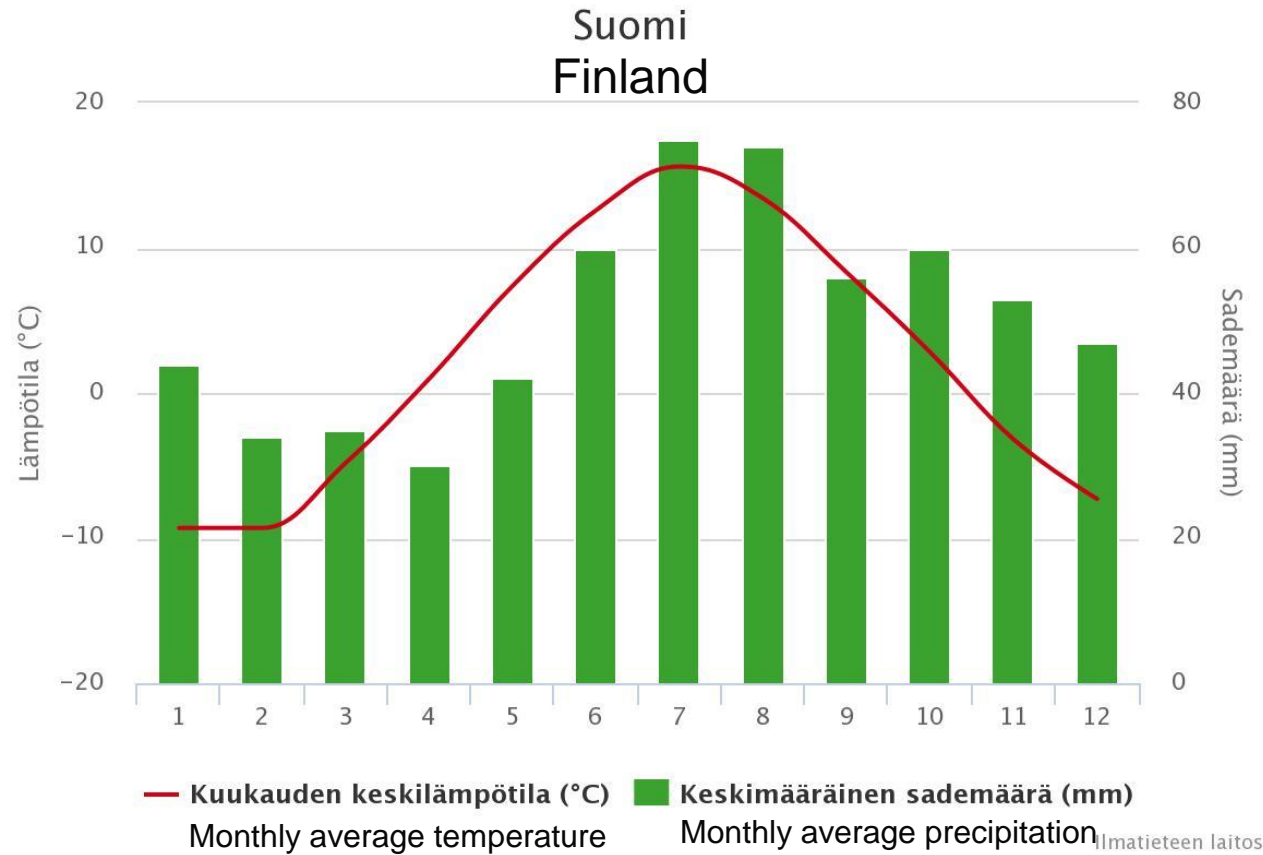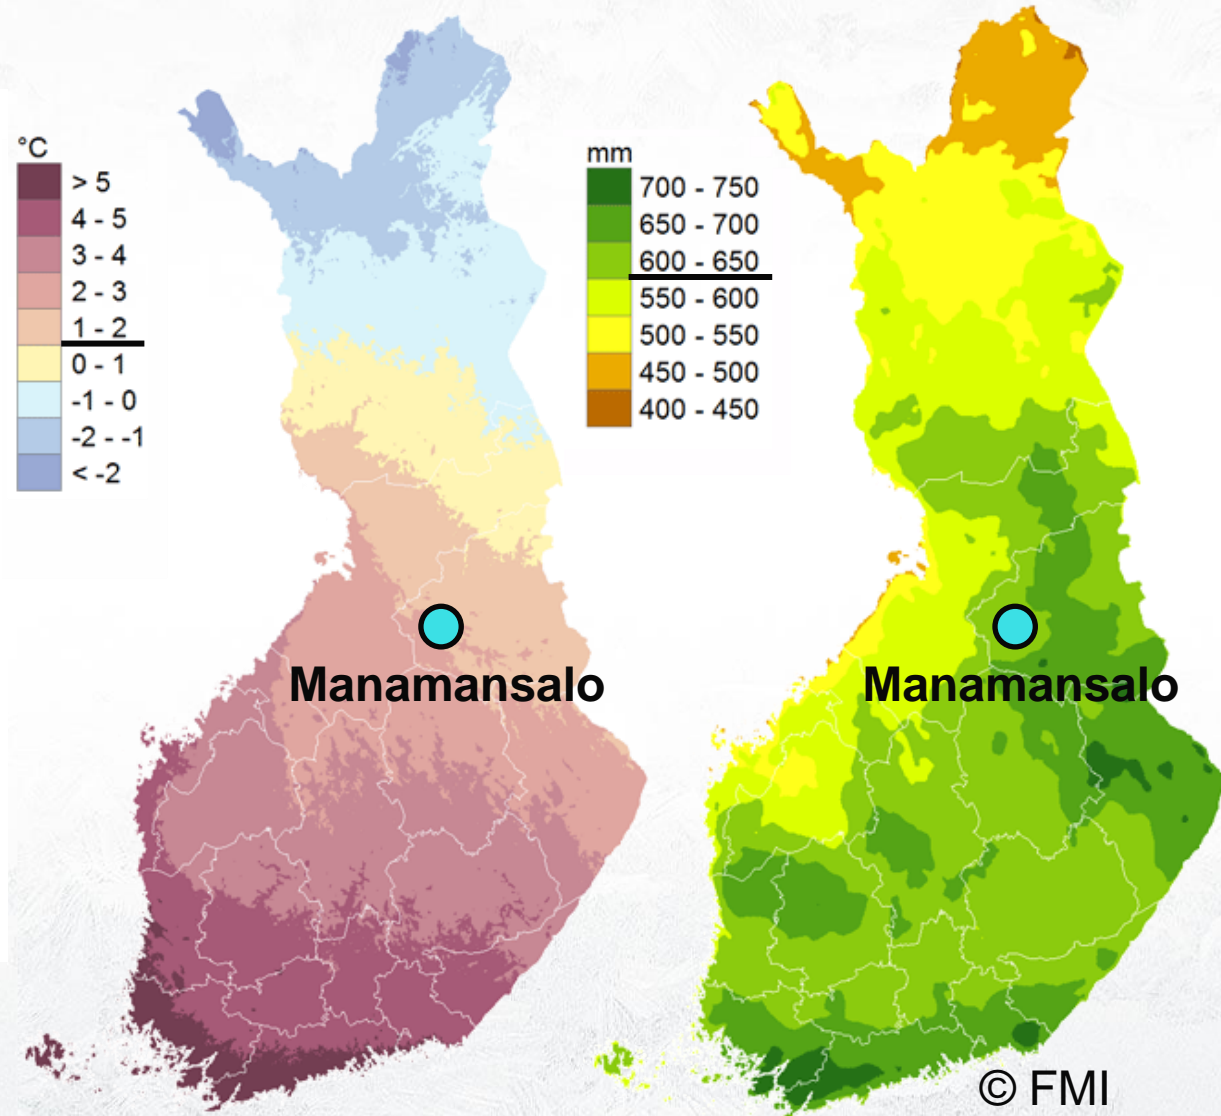

# Winter in Manamansalo

- Meteorologically winter is determined by average temperature values.
  - Thermic winter = average temperature stays below 0 degree Celsius.
- The length of thermic winter in Manamansalo is ca. 160 days.
  - Locally, Lake Oulujärvi decreases the length of thermic winter couple of weeks.

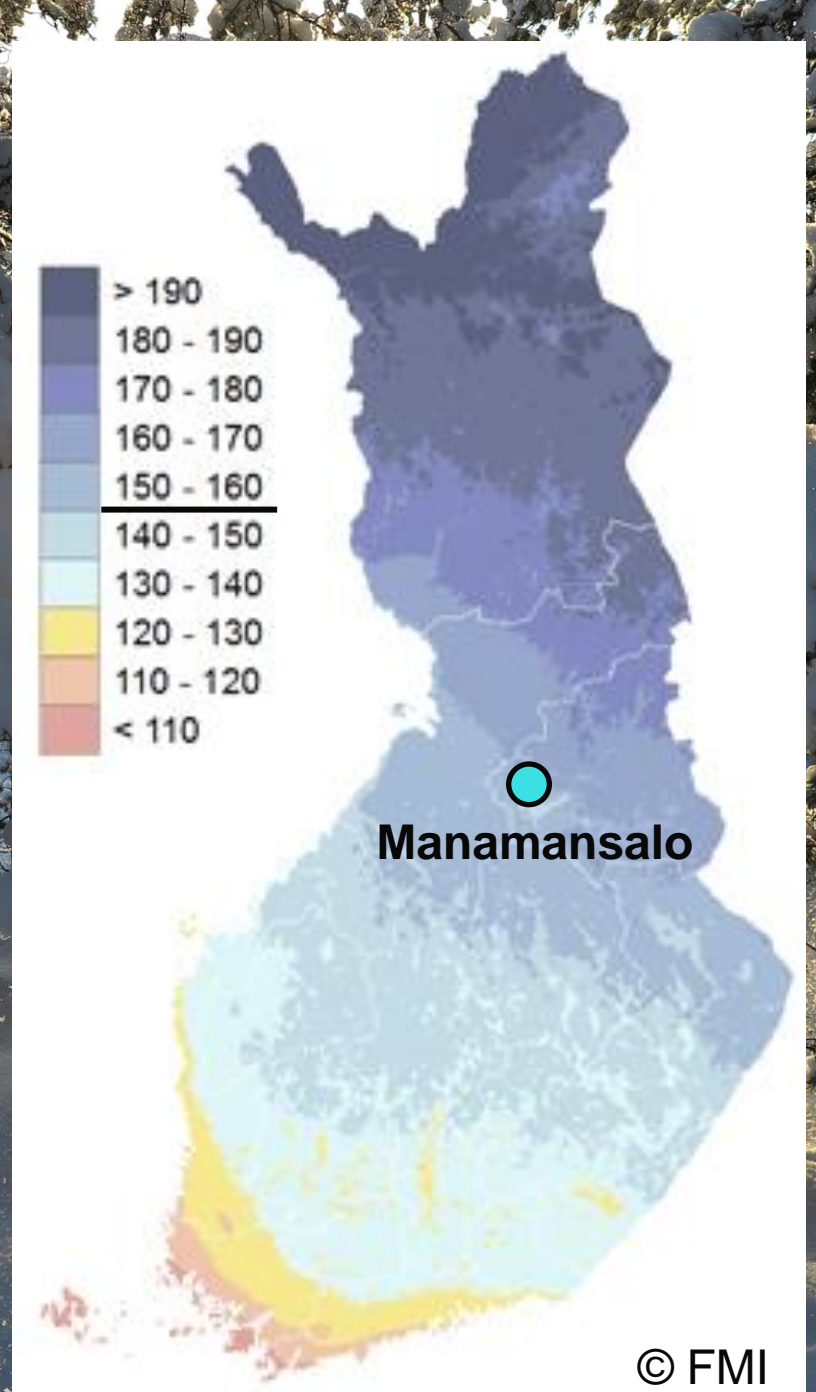

# Winter in Manamansalo

- Stable snow cover usually falls in mid-November.
  - Length of stable snow = the longest period of time when ground is covered by at least 1 cm snow cover.
- Snow cover time in Manamansalo is in average ca. 170 days.

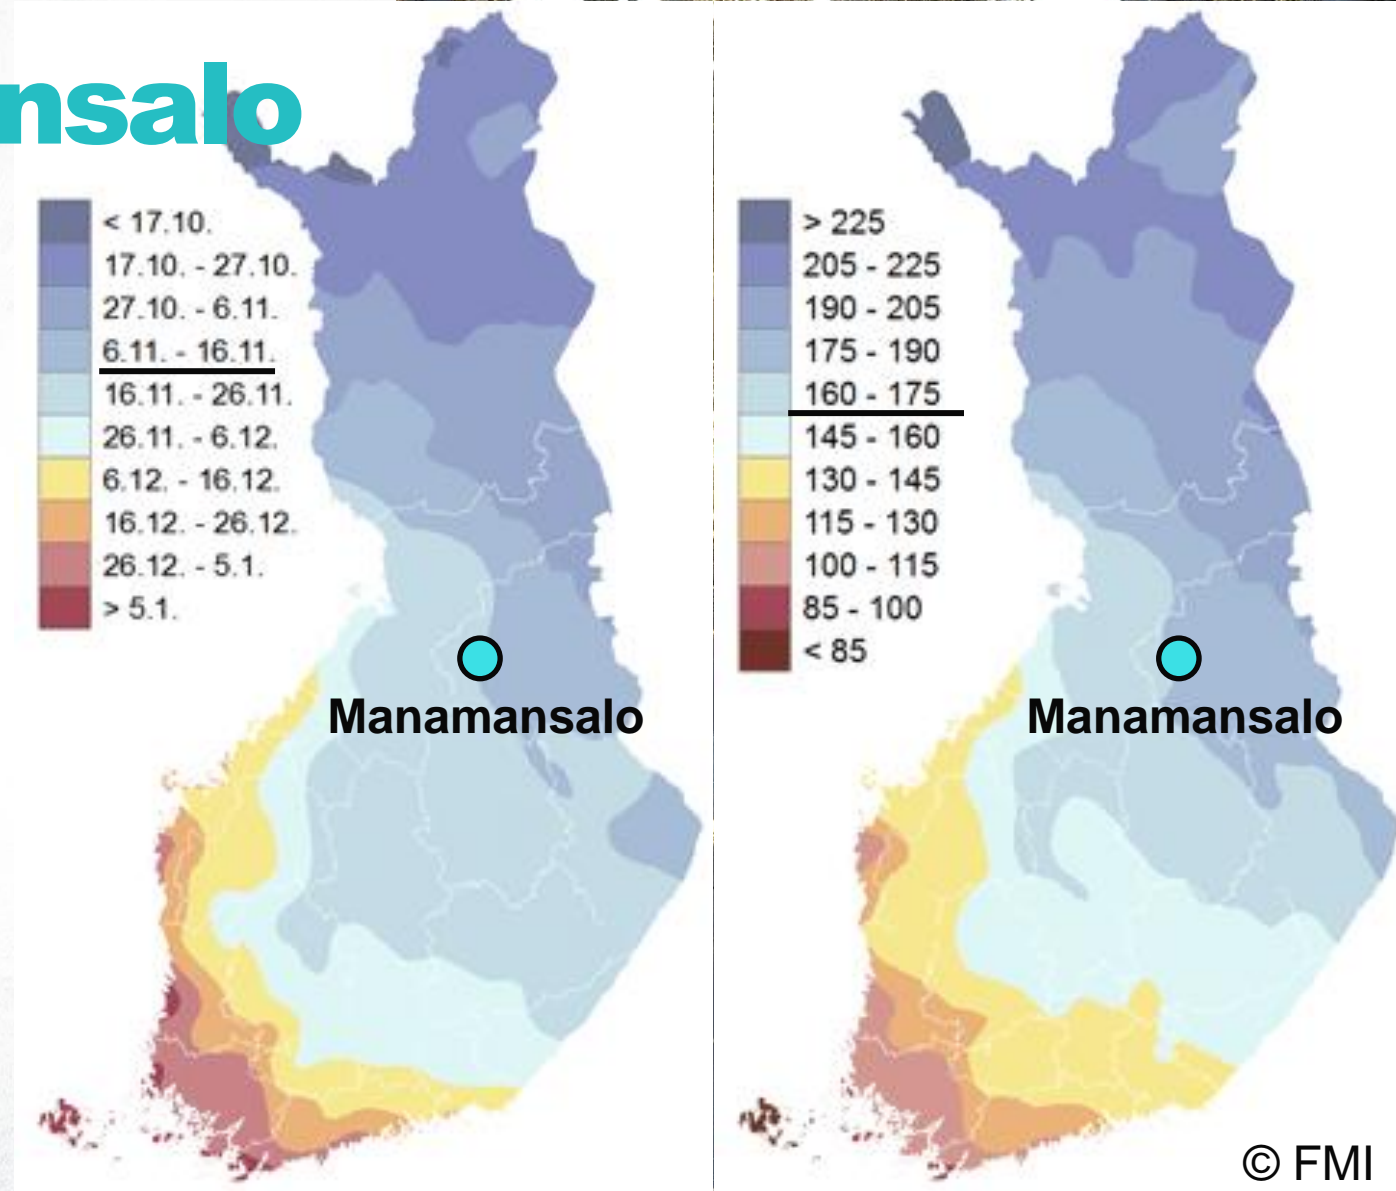

# Snow

- Two main elements:
  - Water (ice crystals, liquid water).
  - Air (pores).
- Density = Weight per volume ( $\text{kg/m}^3$ ).
  - Fresh snow ca.  $100 \text{ kg/m}^3$ , or  $0,1 \text{ kg/l}$ .
  - Compacted snow ca.  $500\text{-}600 \text{ kg/m}^3$ .
  - In windy places even  $800 \text{ kg/m}^3$ .
  - Strong wind, warm temperature ( $>0$  degrees) and gravity increase density.
  - Density affect to rate of insulation.
    - Insulate = not conducting heat
    - Compare: winter clothes

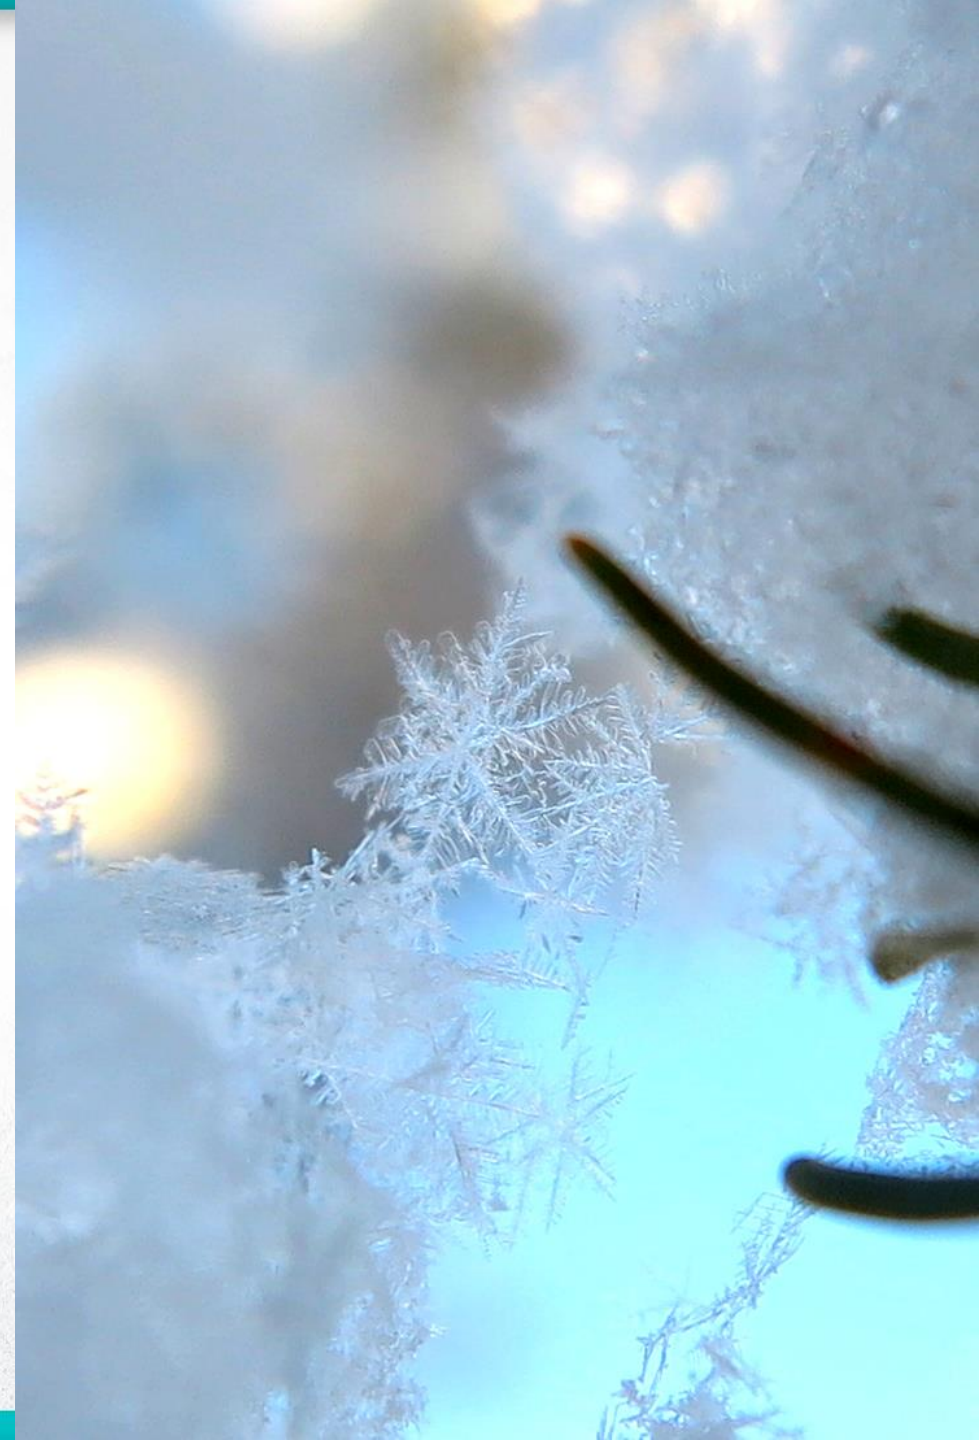

Temperature curves in two different places under and above the snow cover

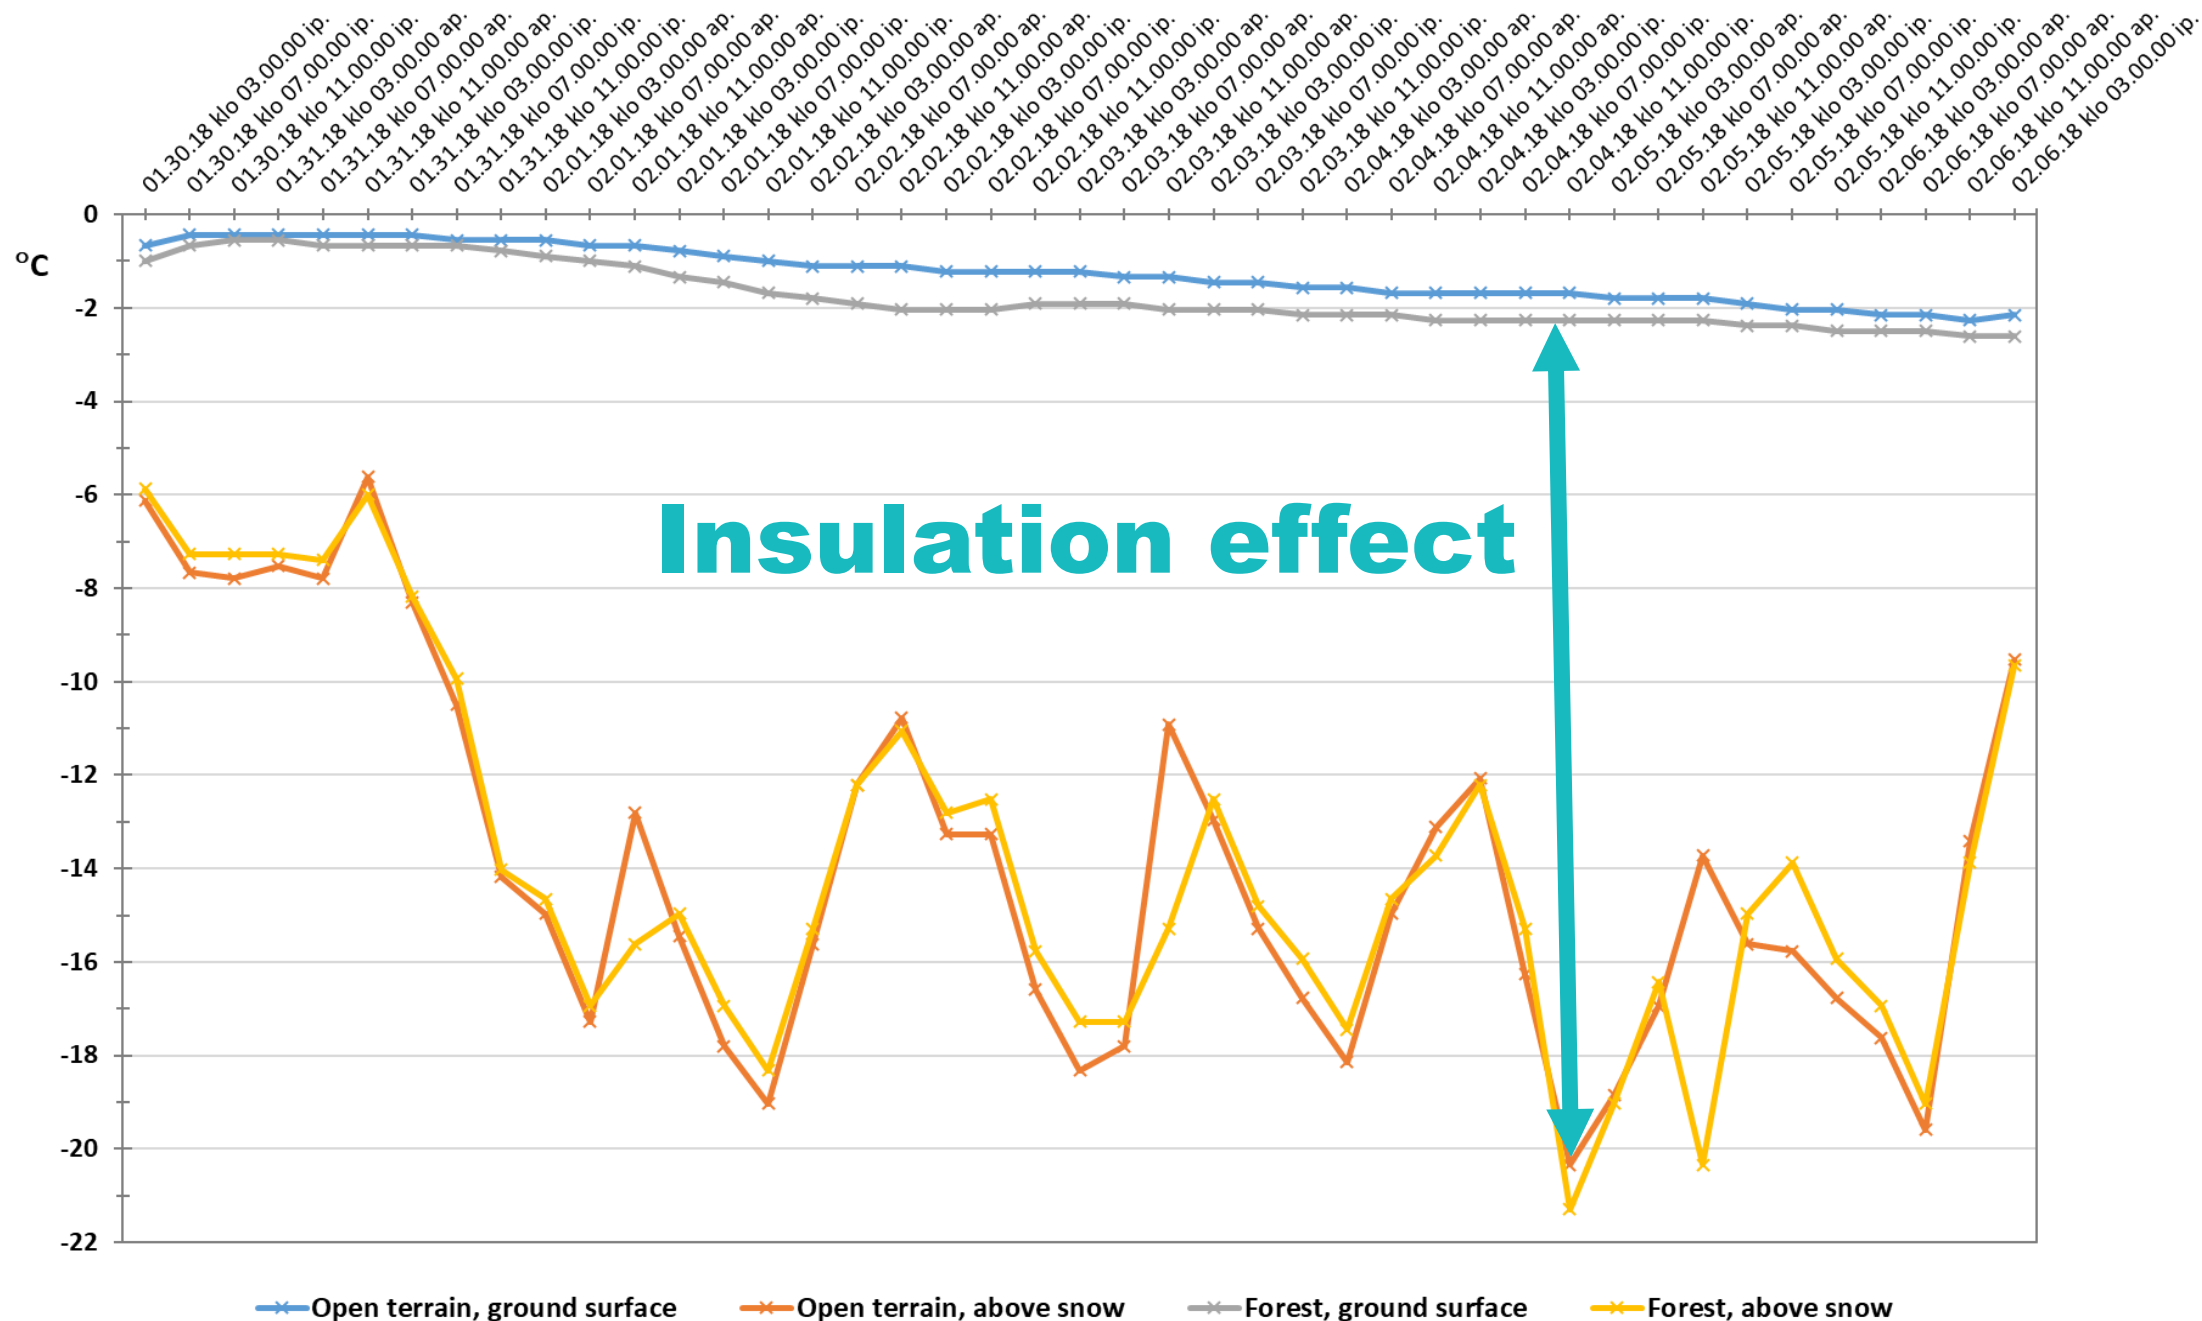

# Winter in Manamansalo

- The average maximum snow depth is ca. 60 cm.
- The average maximum SWE is ca. 150-200 kg/m<sup>3</sup>.
  - SWE = Snow Water Equivalent
  - **SWE = water content in snow** (in millimetres or in kilograms).
  - Usually: kg/m<sup>3</sup>

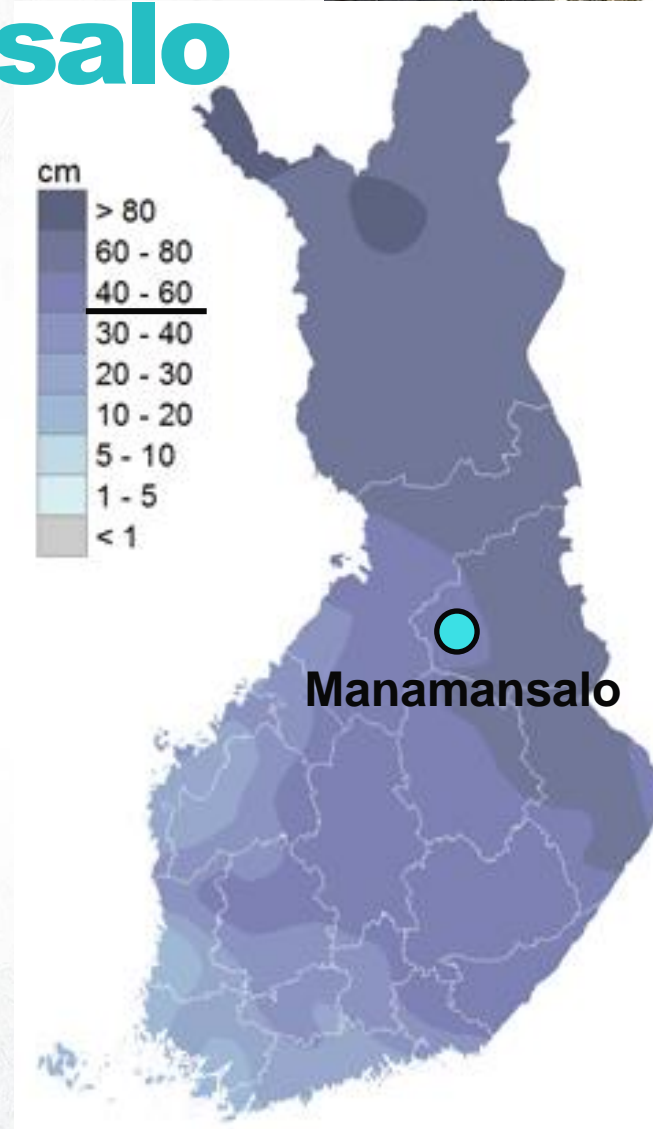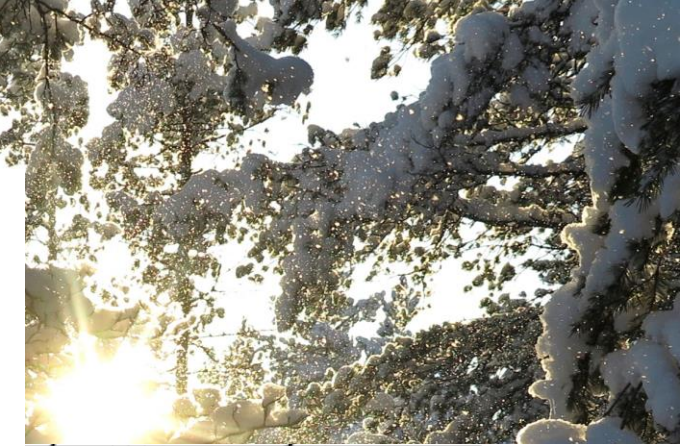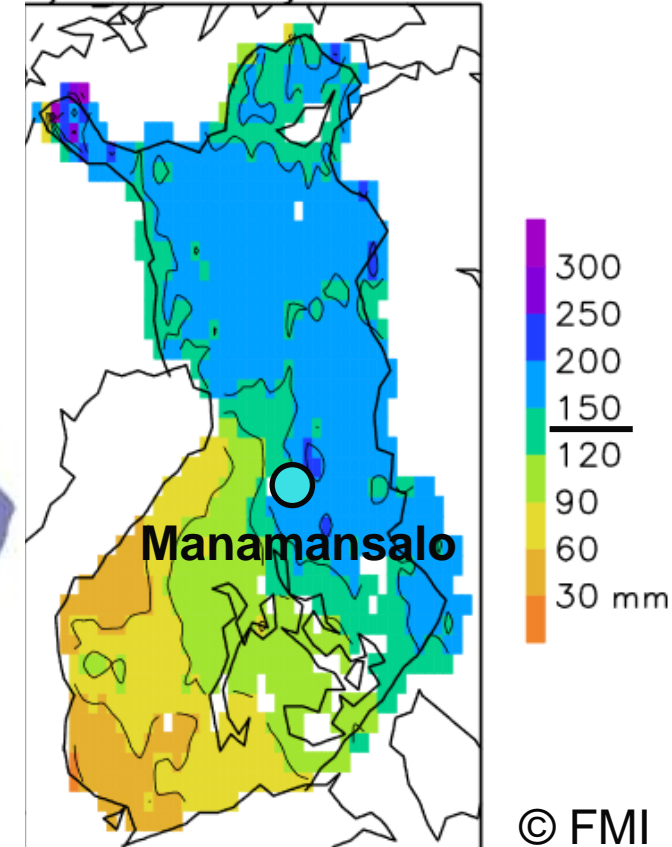

# Variation in snow water equivalent

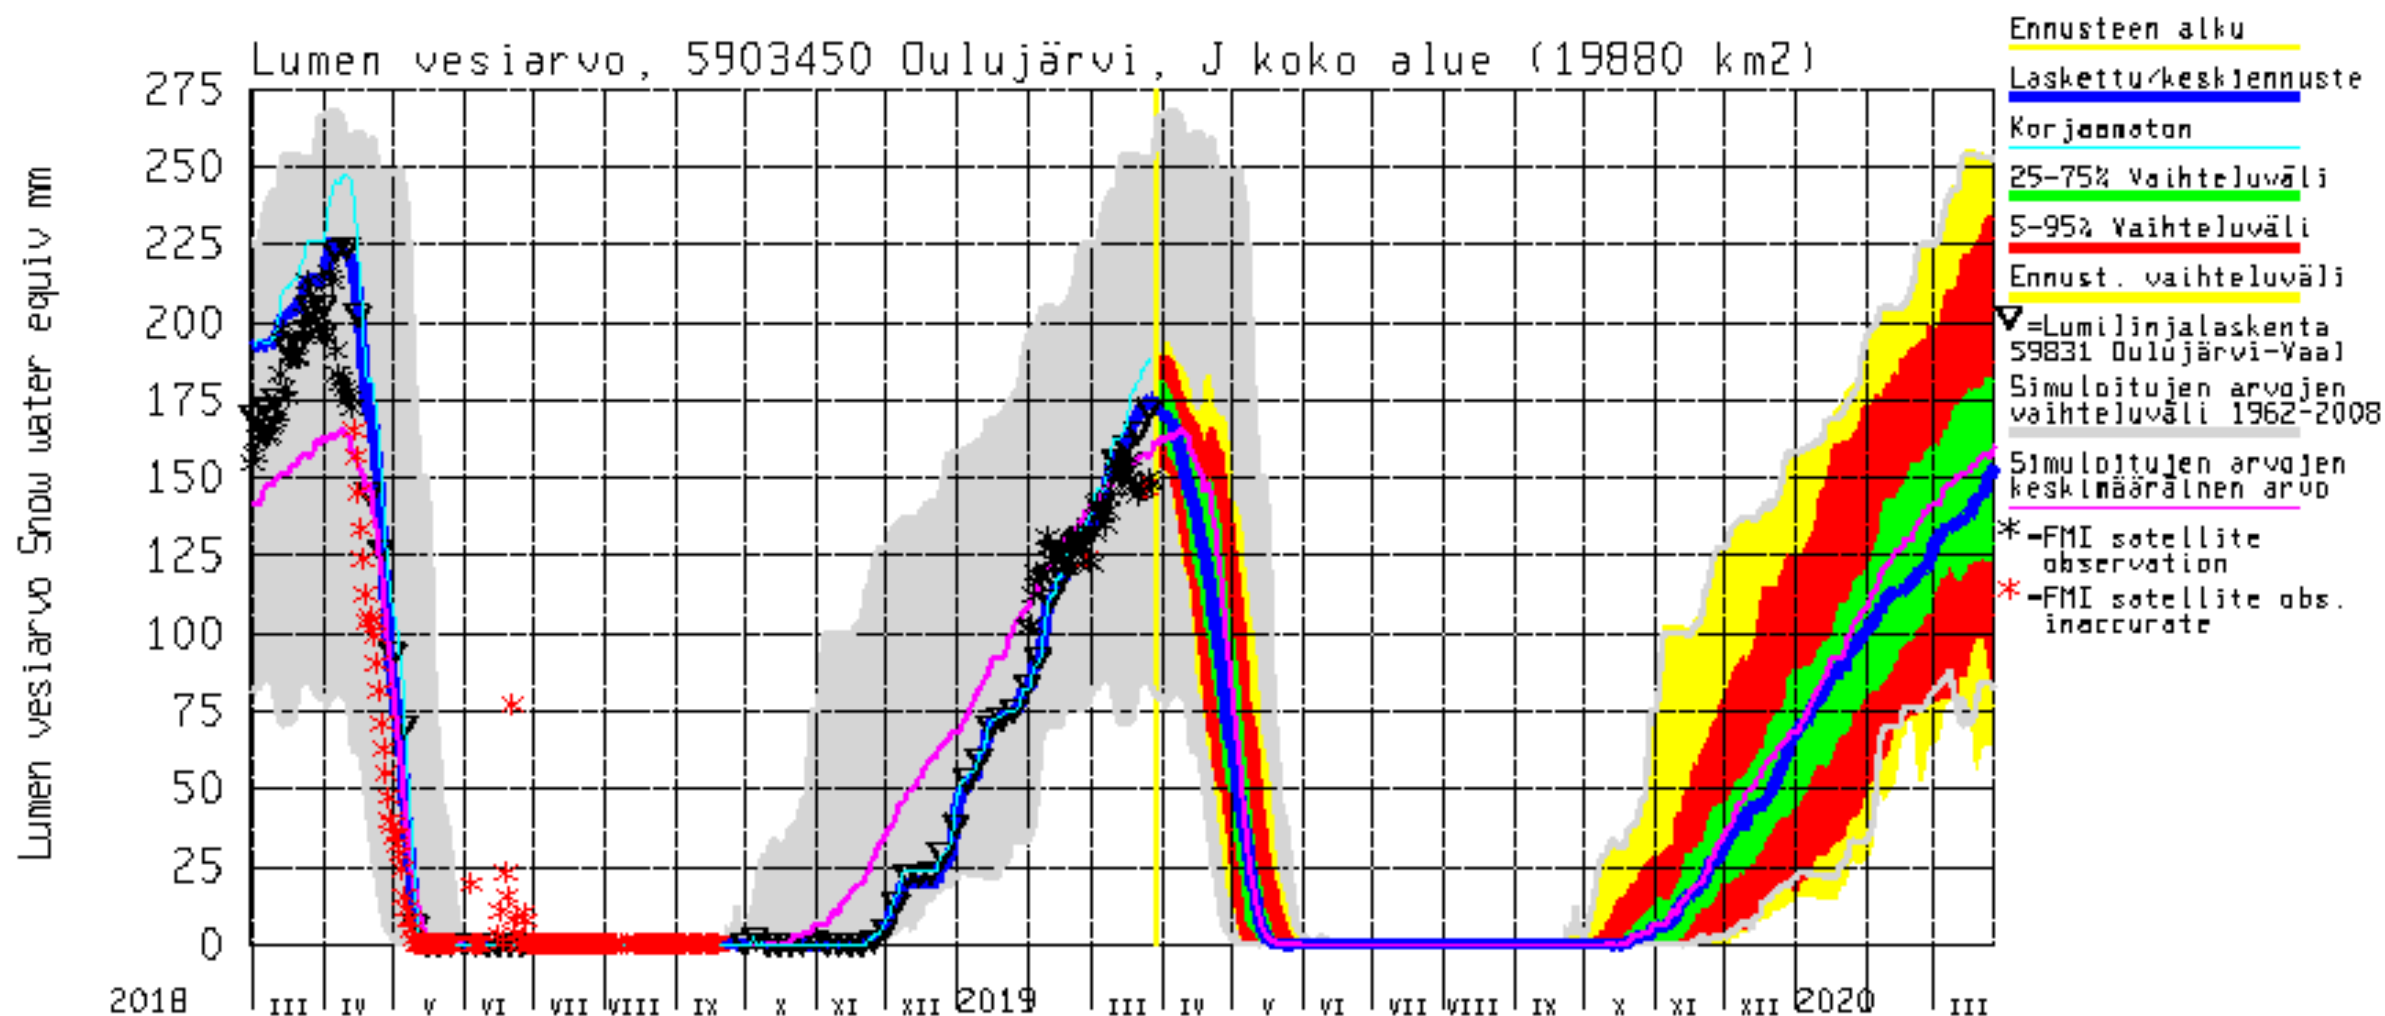

# Ice cap

- **No ice** = No visible ice on water.
- **Partially frozen** = The visible part of lake, river or sea is partially frozen.
- **Continuous icecap** = The whole visible part of the waterbody is frozen.
- **Thickness of ice** (unit: centimetres):
  - **Ice** = Thickness of the whole icecap.
  - **Water** = Depth of free water below the icecap.
  - **Porous ice** = Thickness of porous ice layer (weak ice layer with lots of air bubbles).
  - **Bright ice** = Thickness of hard, transparent ice layer.
  - **Snow** = Depth of snow above the porous ice.
- **Constant icecap** = Exact date, when waterbody got continuous ice cap.
- **Ice run** = Exact date, when the icecap cracks and began to move.
- **Iceless period** - Exact dates, when there is no ice visible anymore.

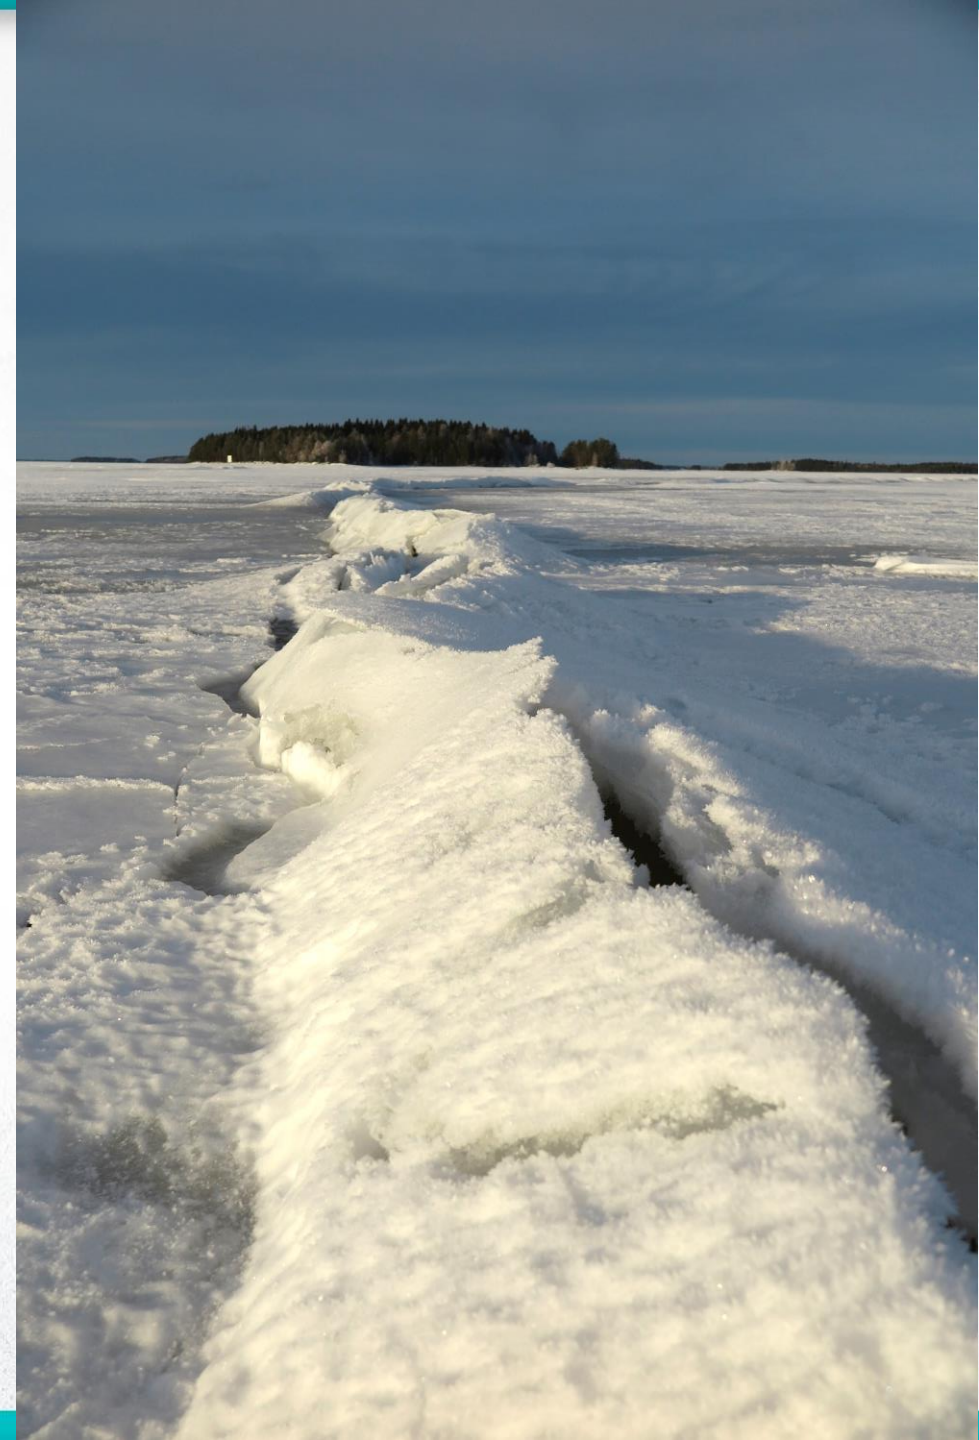

## Arctic ice sheet extent; change from 1978-2016.

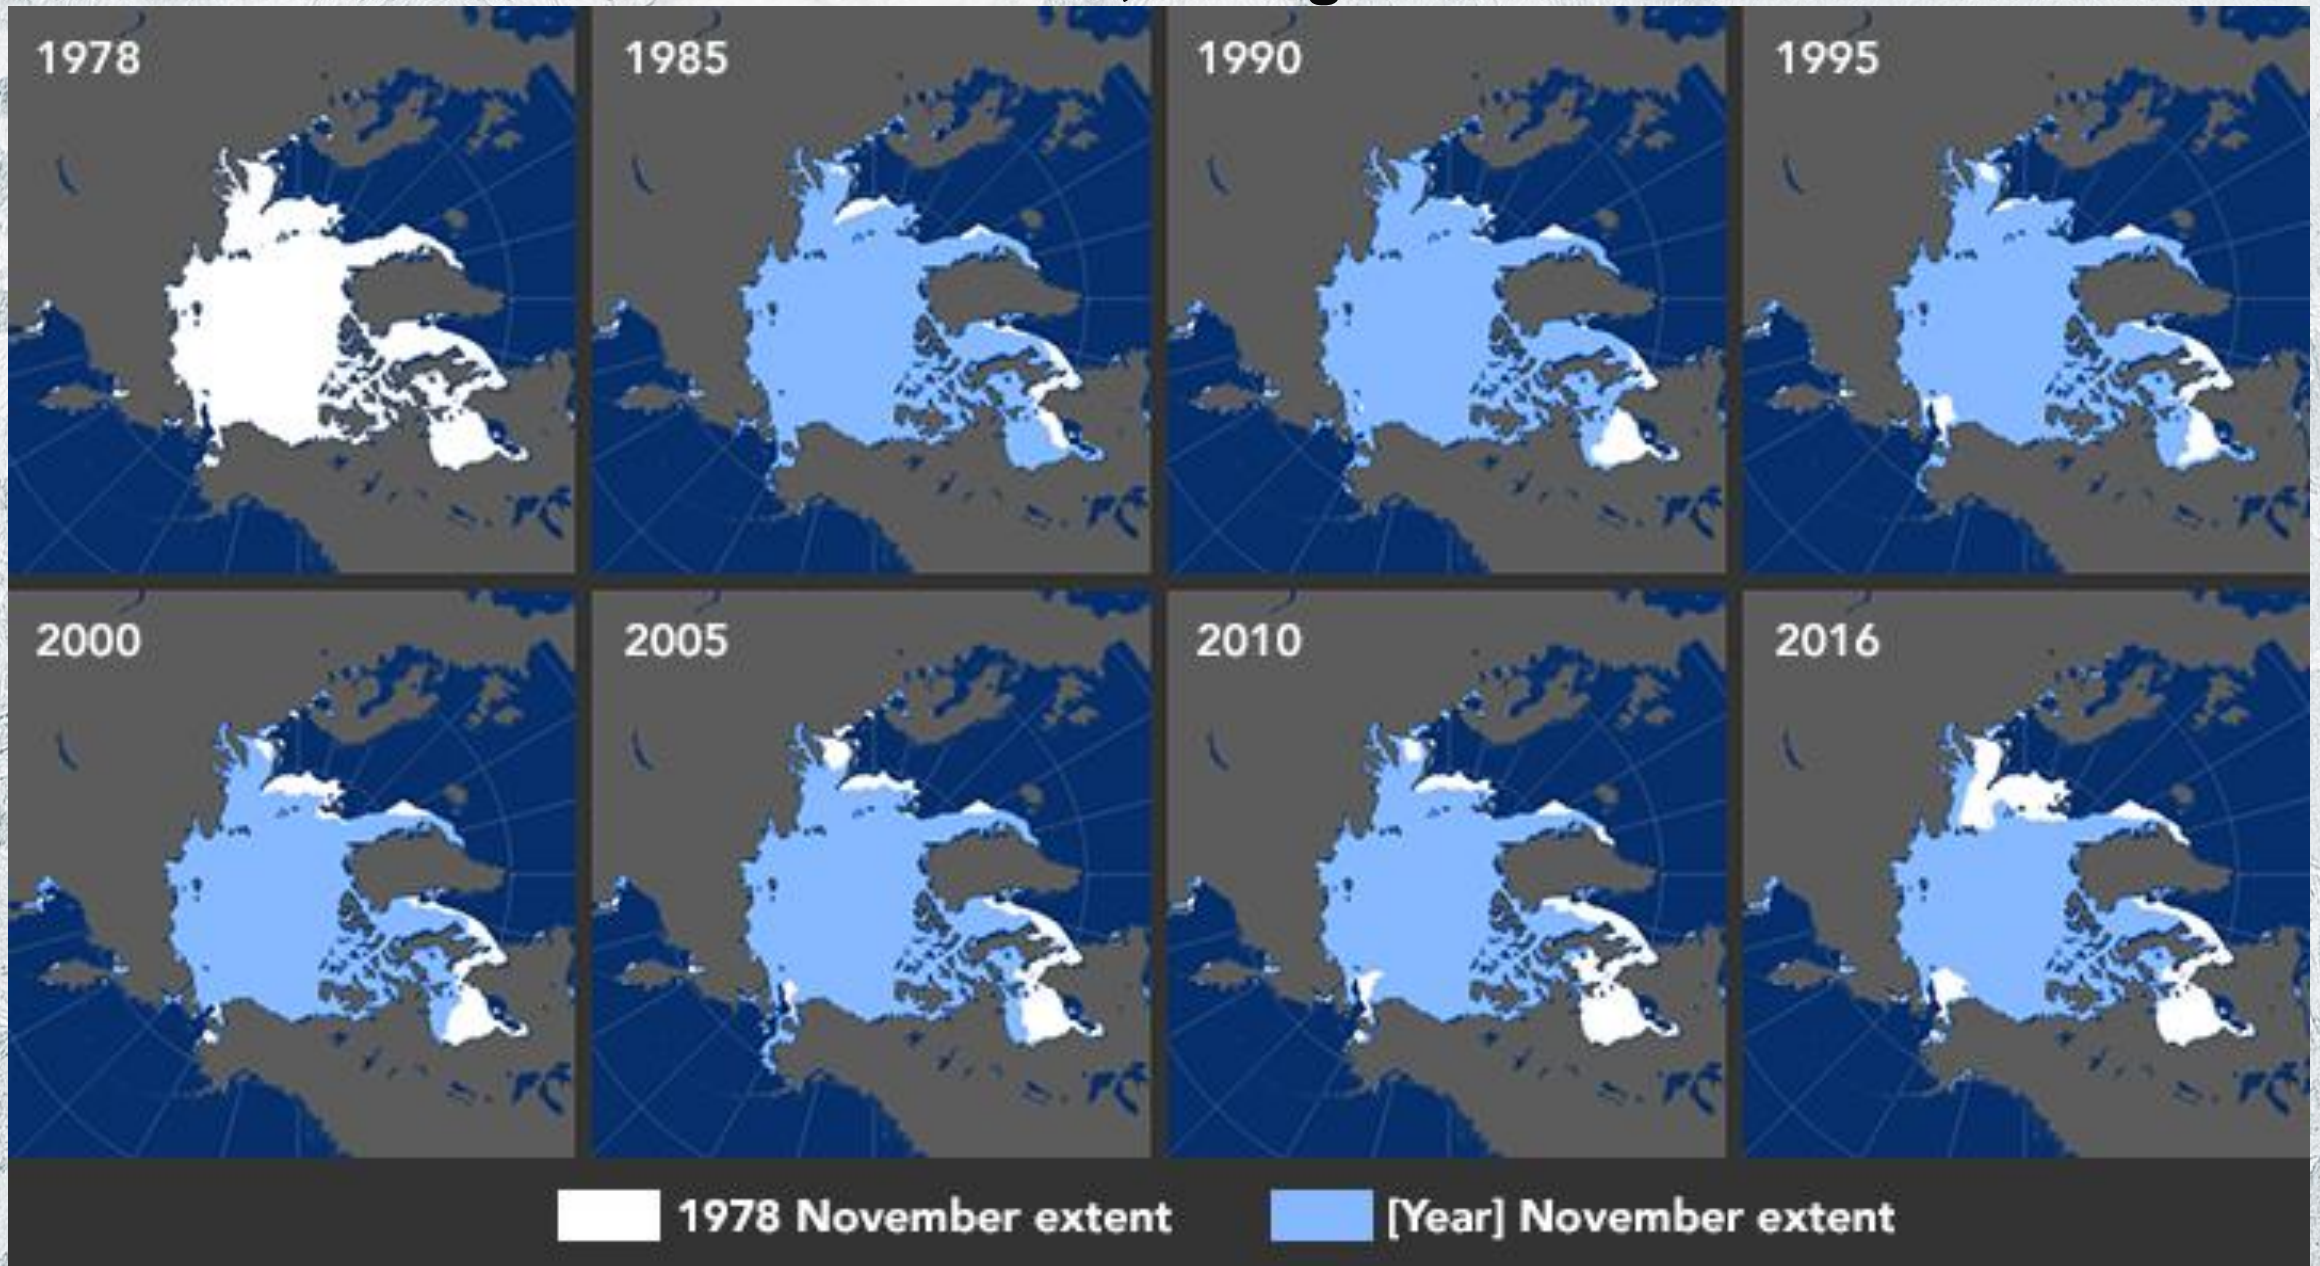

# Arctic Sea Ice Is Thinning

Ice depth levels in autumn

**-1.07 million km<sup>2</sup>**

The Arctic's sea ice extent has shrunk in every decade since 1979, with 1.07 million km<sup>2</sup> of ice loss every decade.  
- *United Nations Development Program*

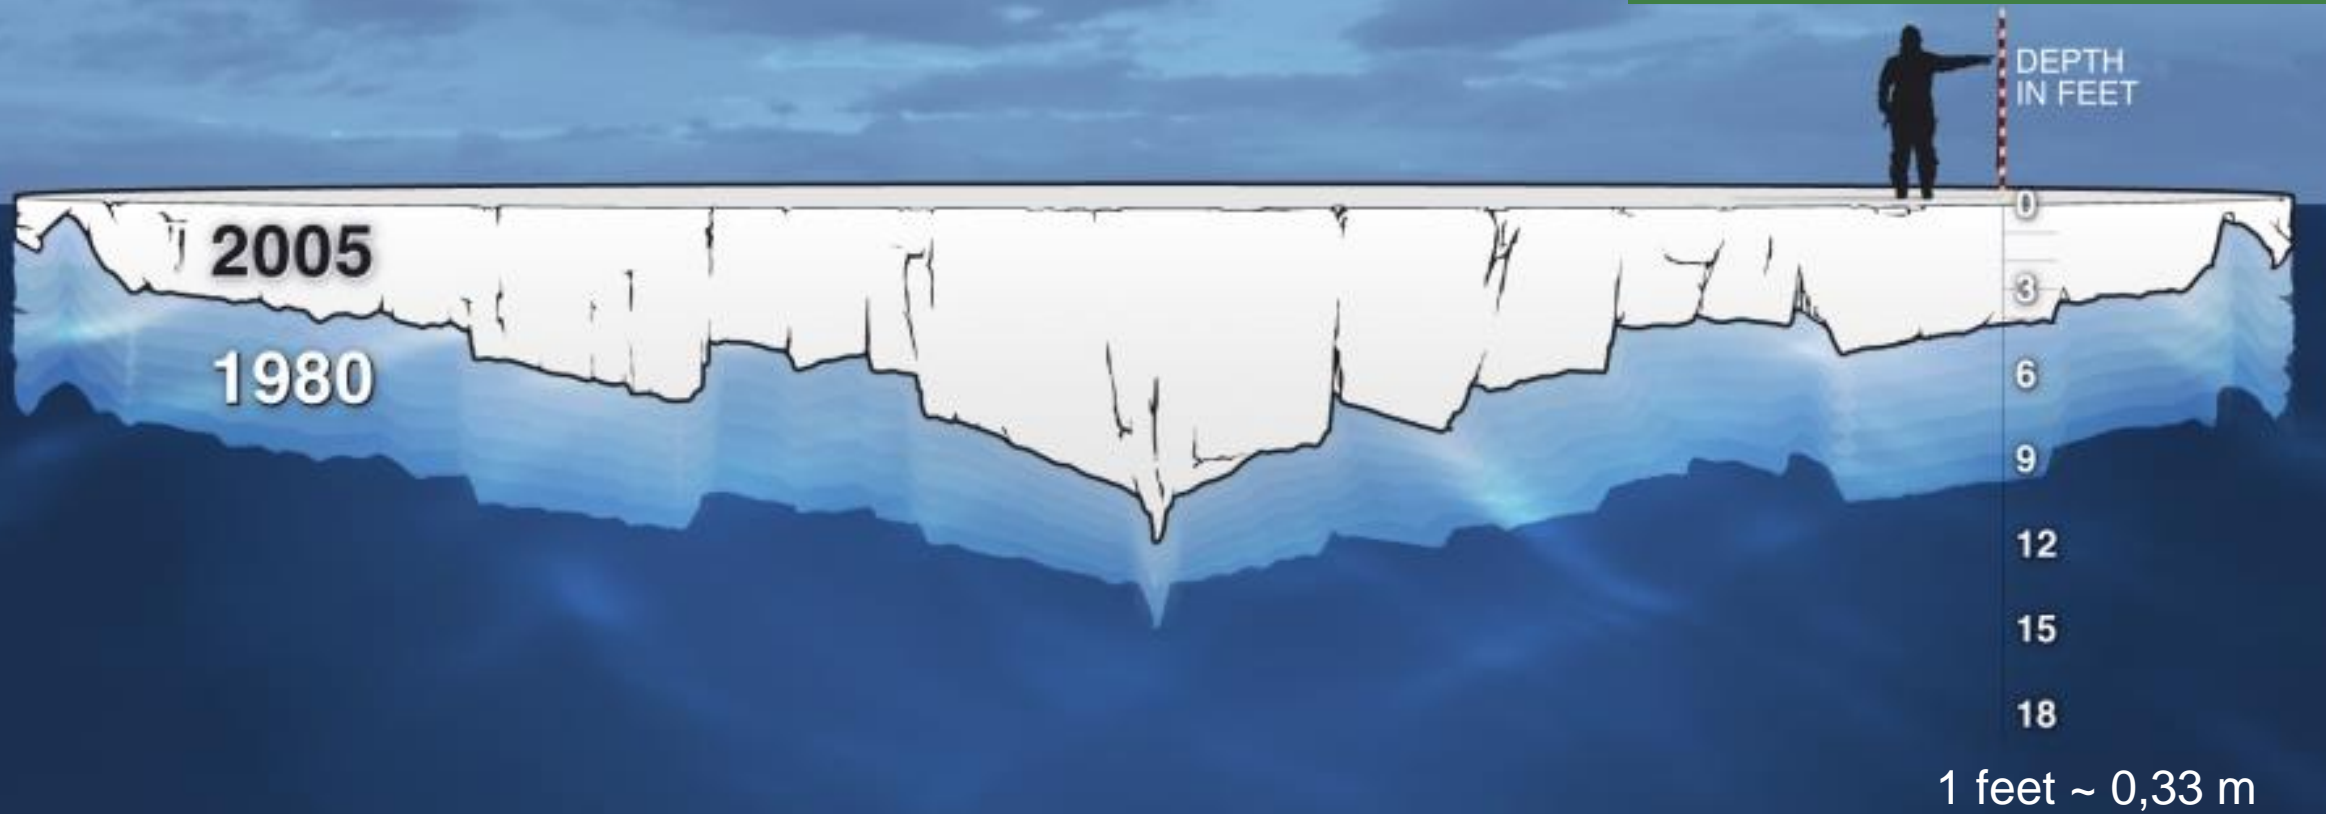

# Ice thickness in Lake Oulujärvi in winter 2018-2019 compared to longer term average.

27.3.2019

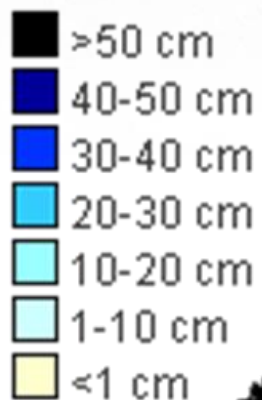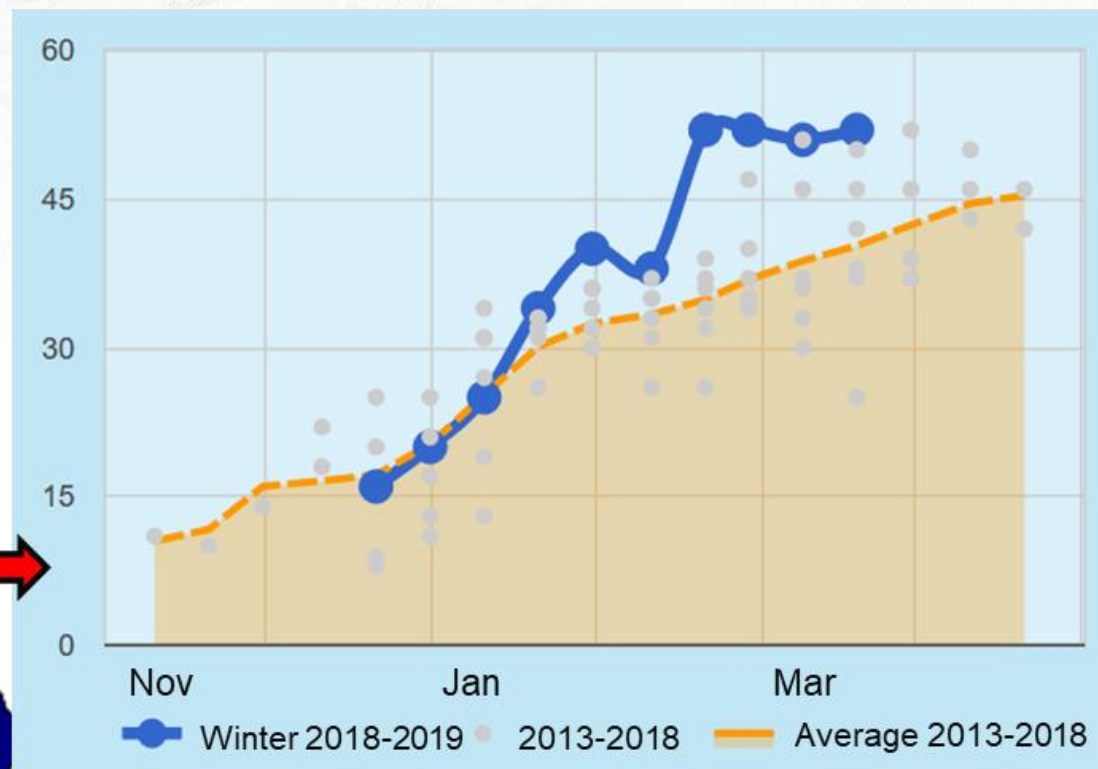

[https://www.jarviwiki.fi/wiki/Ouluj%C3%A4rvi\\_\(yhd.\)/Ymp%C3%A4rist%C3%B6hal  
linnon\\_havaintopaikka\\_\(Manamansalo,\\_j%C3%A4%C3%A4tilanne\)](https://www.jarviwiki.fi/wiki/Ouluj%C3%A4rvi_(yhd.)/Ymp%C3%A4rist%C3%B6hal<br/>linnon_havaintopaikka_(Manamansalo,_j%C3%A4%C3%A4tilanne))

# Average duration of continuous icecap in some Finnish lakes.

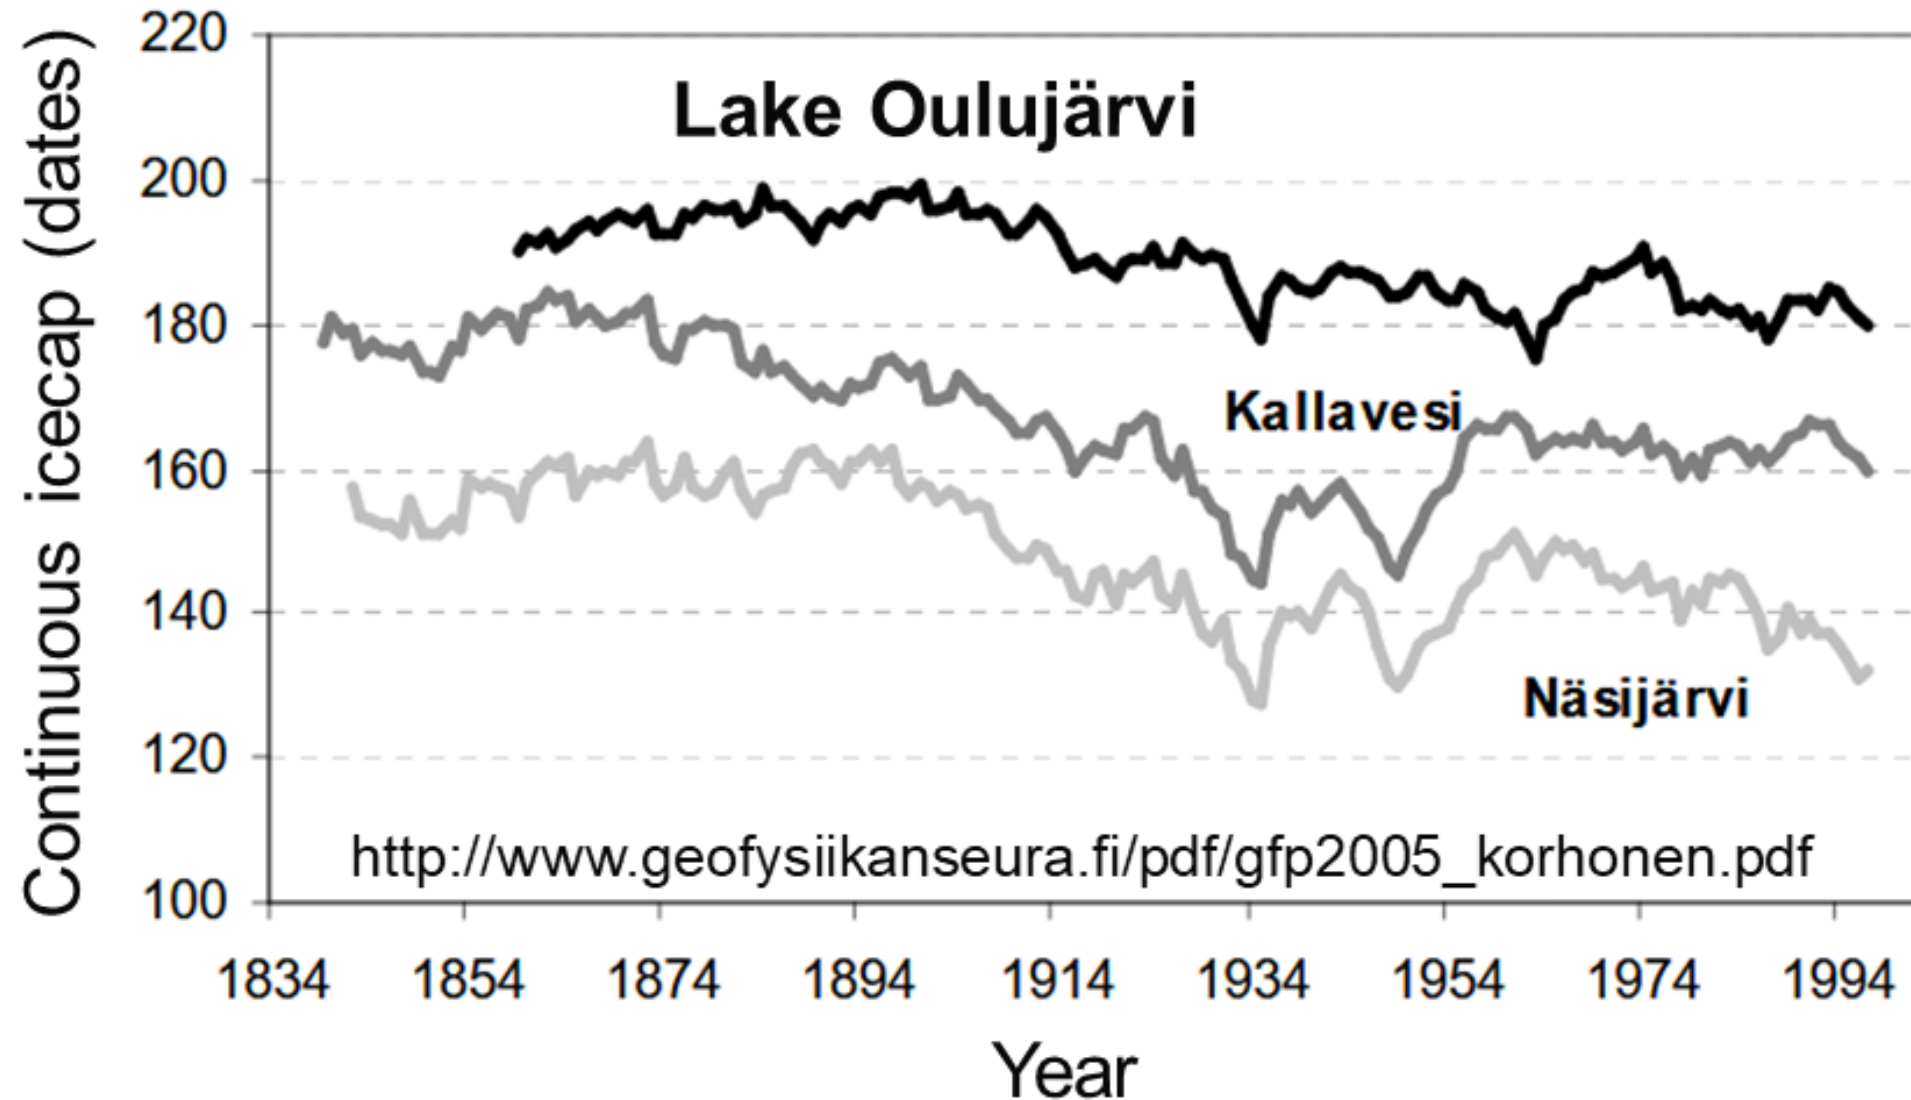

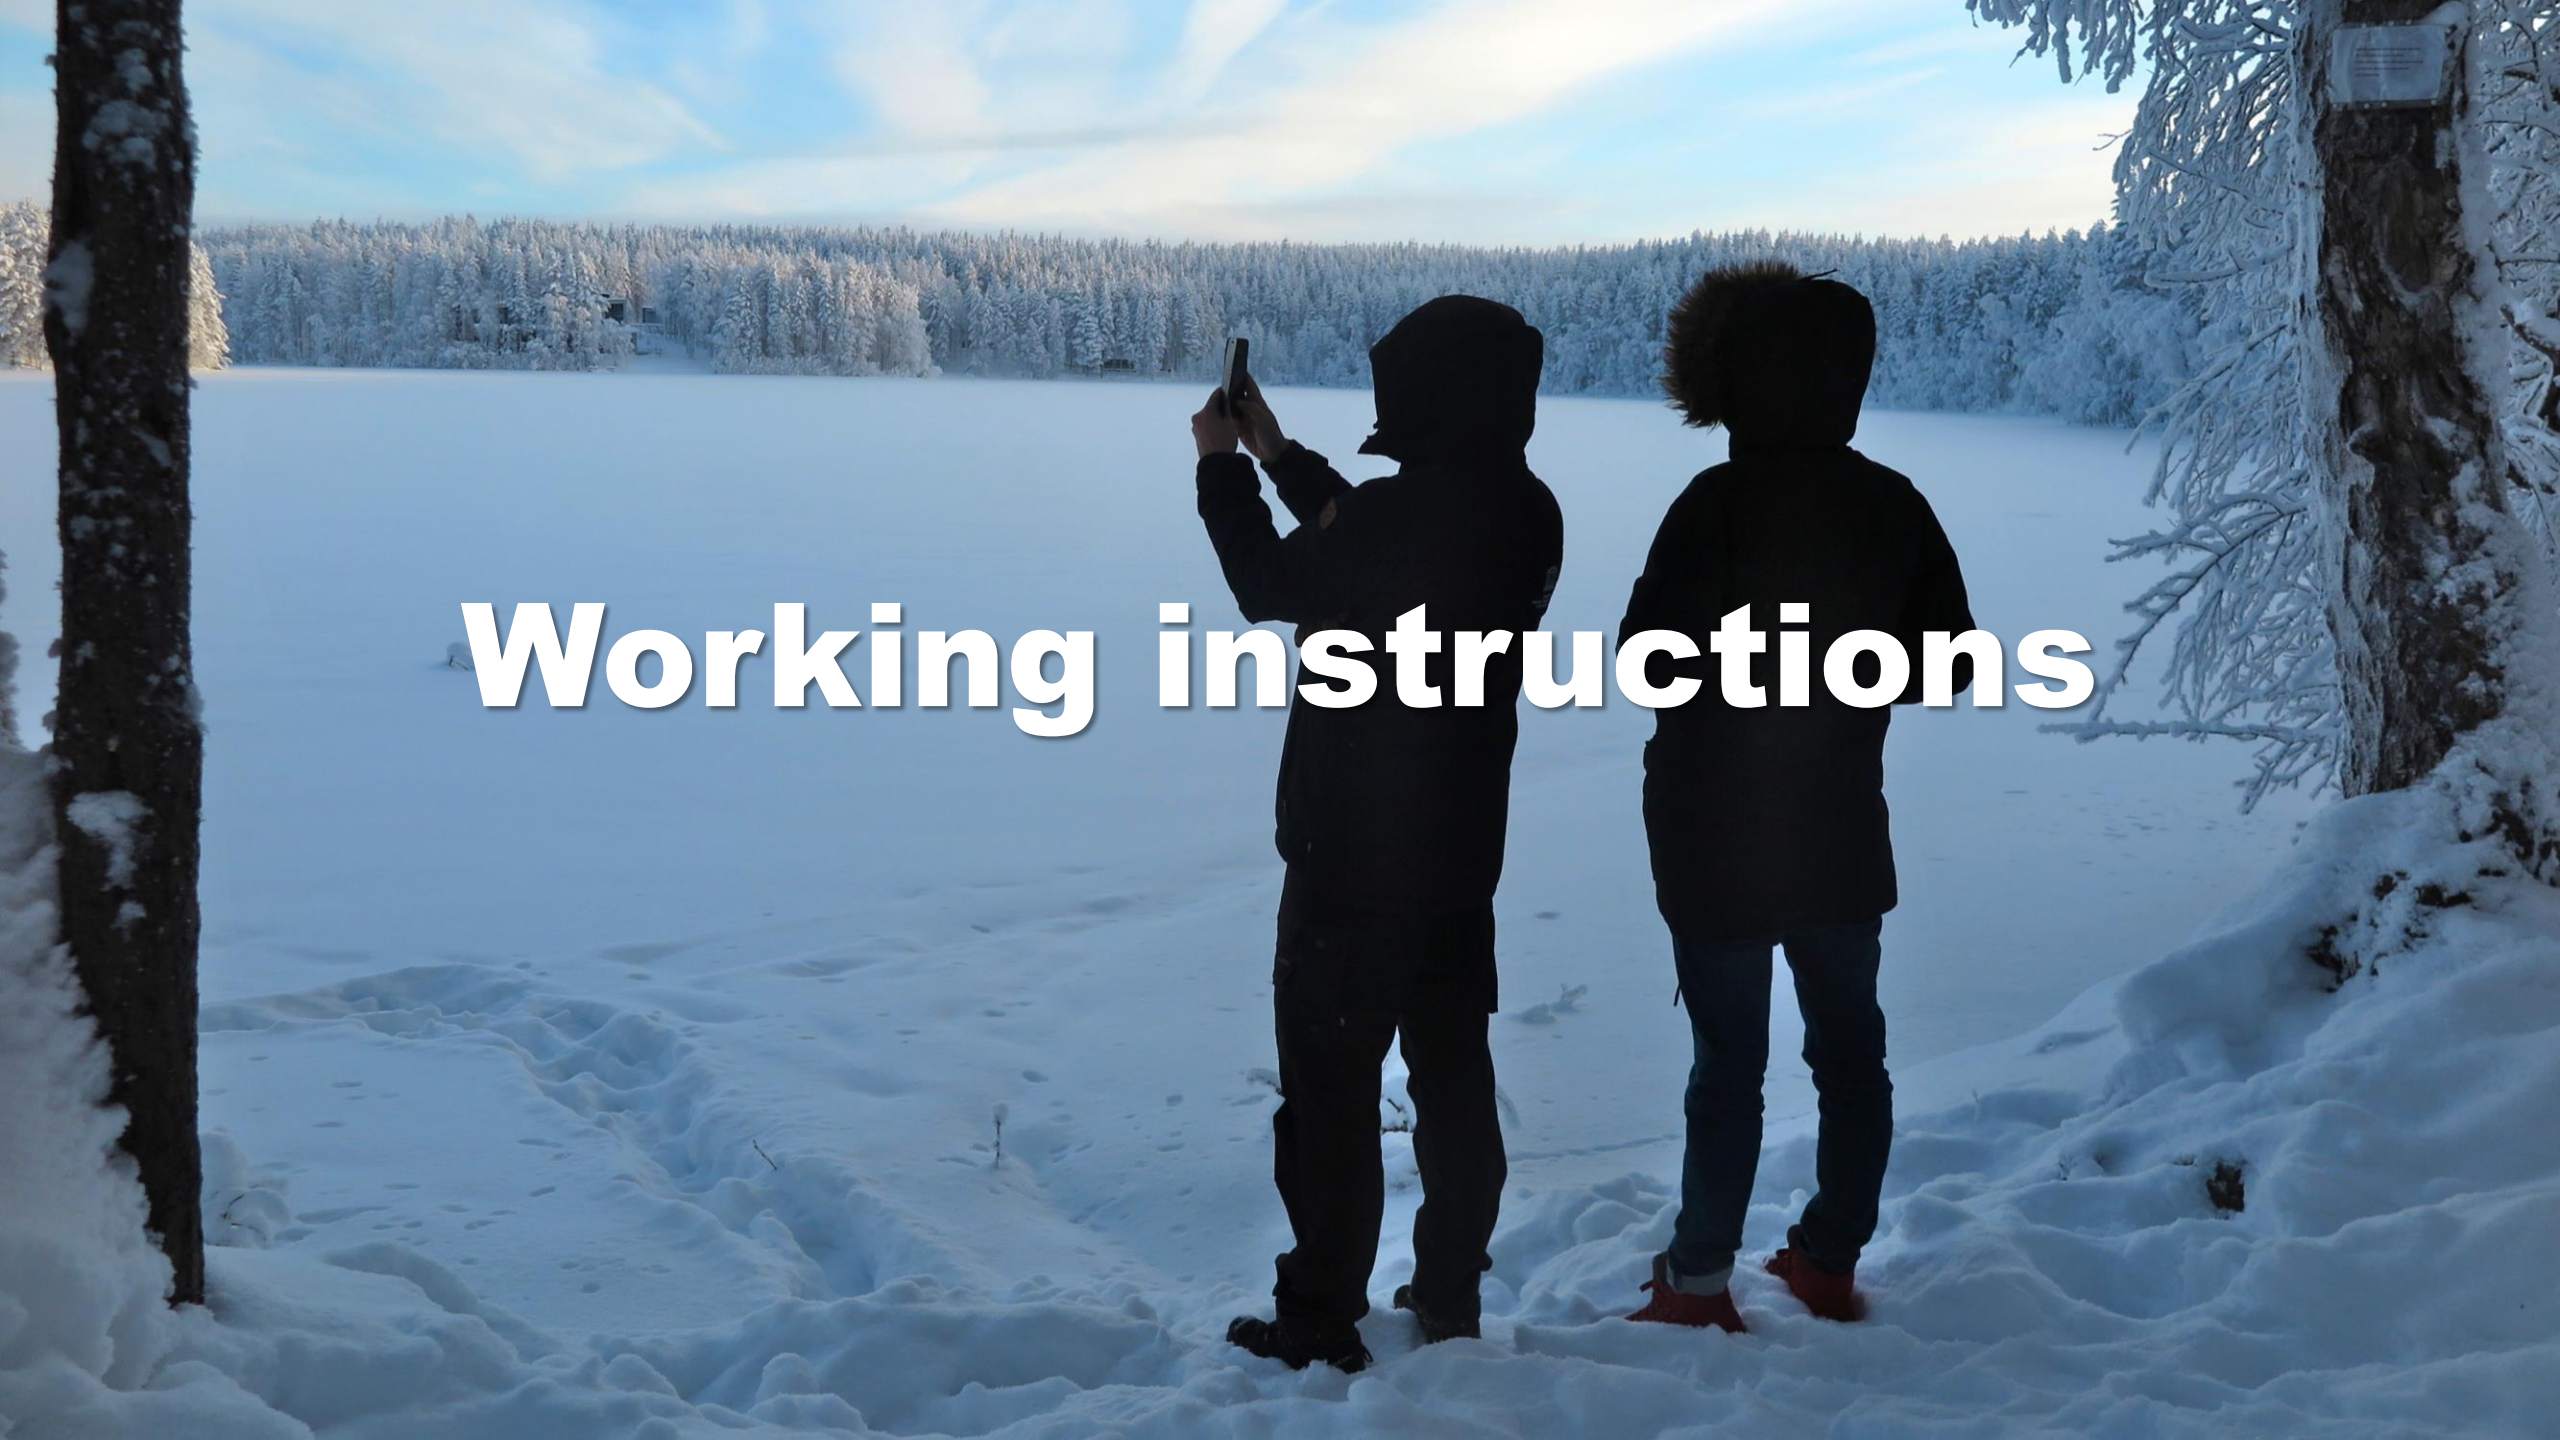A photograph of two children standing in a snowy landscape. The child on the left is wearing a dark hooded jacket and pants, holding a smartphone up to take a picture. The child on the right is wearing a dark jacket with a fur-lined hood and blue pants. They are standing on a snow-covered ground with footprints. In the background, there is a dense forest of snow-covered trees under a blue sky with light clouds. The text "Working instructions" is overlaid in the center in a bold white font.

**Working instructions**

# Measuring snow depth

1. **Select ca. 30 metres line.**
  - Snow cover should be untouched.
2. **Measure the depth in 3 points (A-C).**
  - In the beginning, in the middle and in the end of the line.
3. **Push the wooden liner until it hits ground.**
4. **Read value in the stick.**
5. **Write the value in the worksheet.**

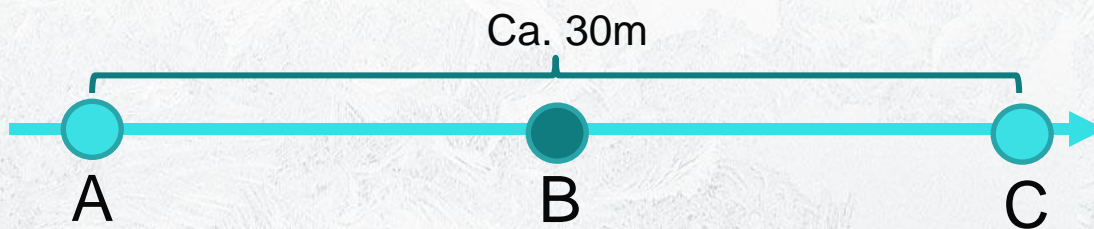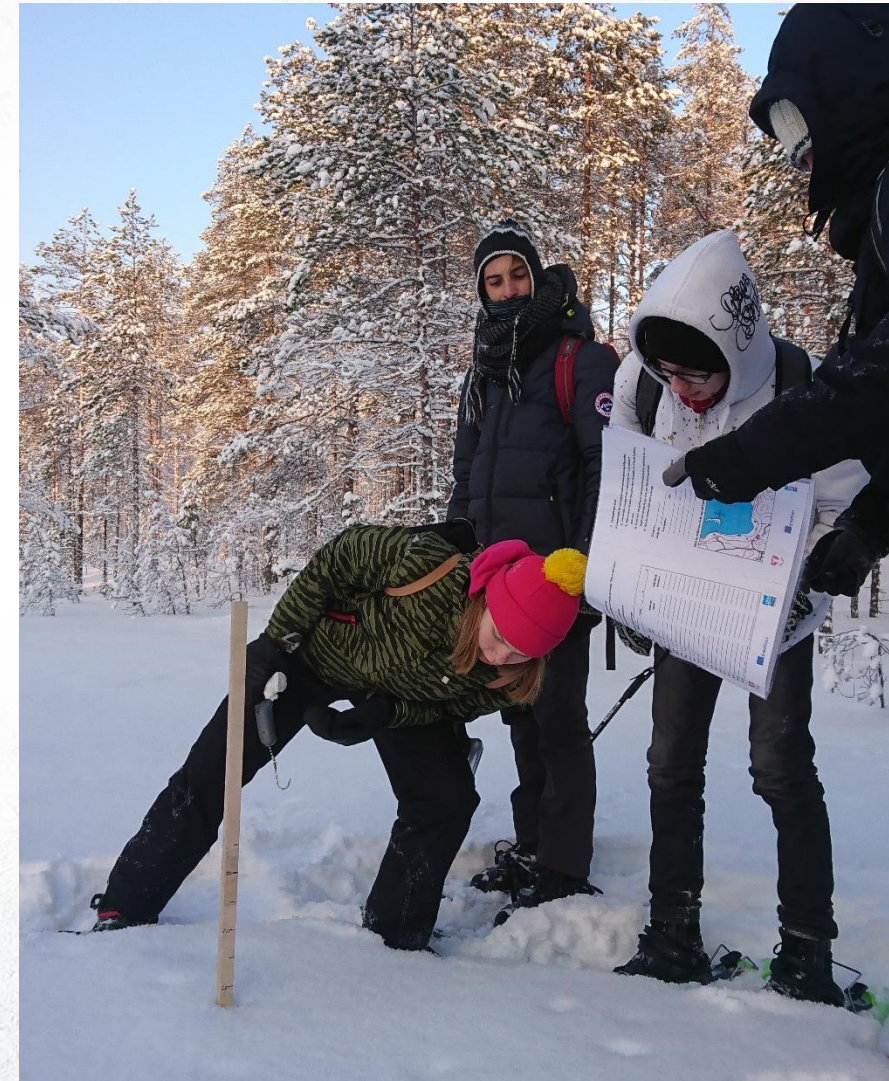

# Measuring snow water equivalent

1. Use the same line as for snow depth.
  - Measure SWE in the middle of the line.
2. Push the pipe until it hits ground.
3. Polish one side off snow with shovel.
4. Push a shovel under the pipe.
5. Rise and empty the pipe to a plastic bag.
6. Weight the bag with a steelyard.
7. Write the value in the worksheet.
8. Calculate snow load per one square metre.

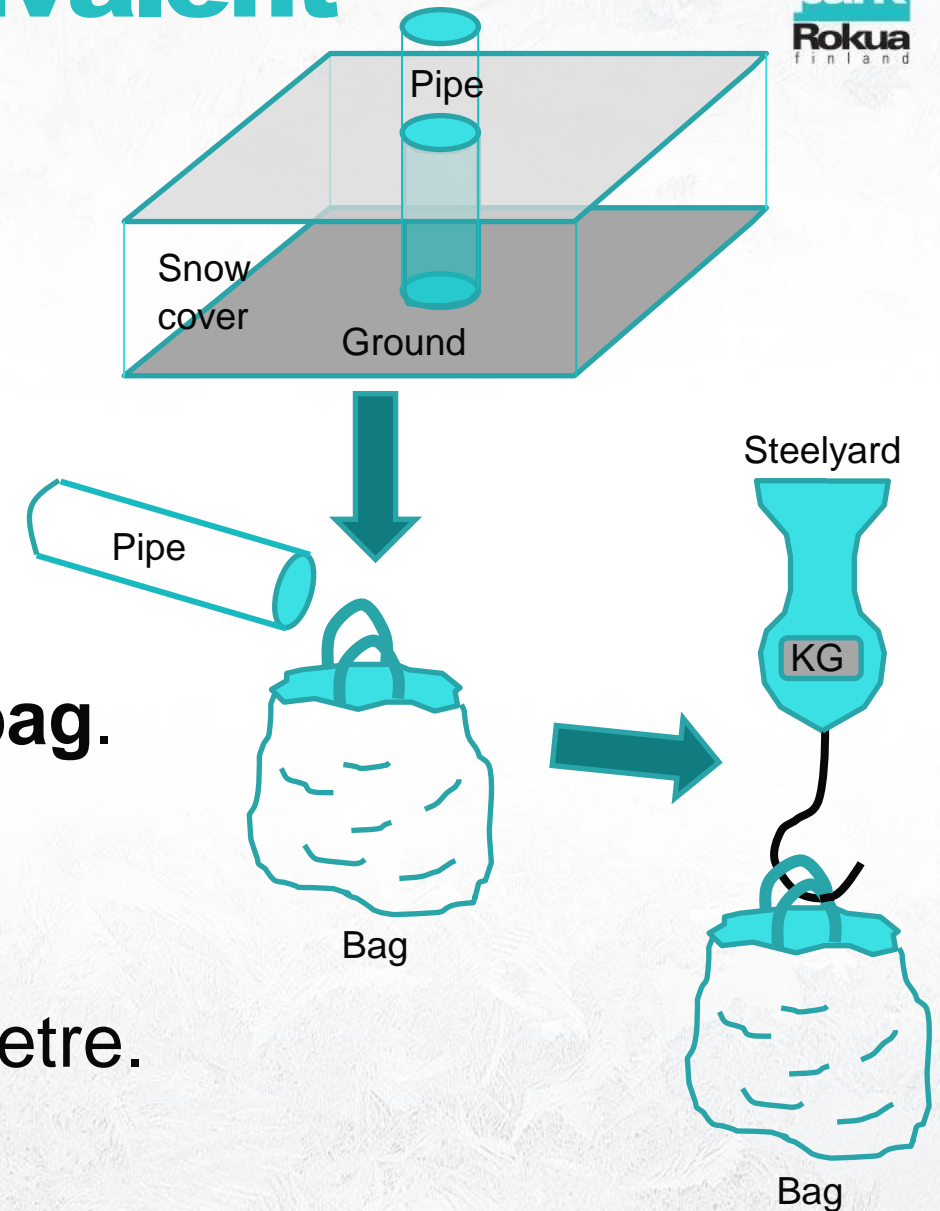

# Measuring ice cap

1. **Select two measurement points.**
  - Near shore and long distance from the shore.
  - **NOTICE: Make sure it is safety to go on ice!!!**
2. **Drill a hole** through ice cap. If possible, take a sample of ice using an ice saw.
3. **Measure total thickness** of ice cap. Mark the value in your worksheet.
4. **Measure the thicknesses of** (look the picture):
  - a) *Porous ice* (in picture: 28 cm),
  - b) *Bright ice* (in the picture: 5 cm).
5. **Mark the values** in your worksheet.

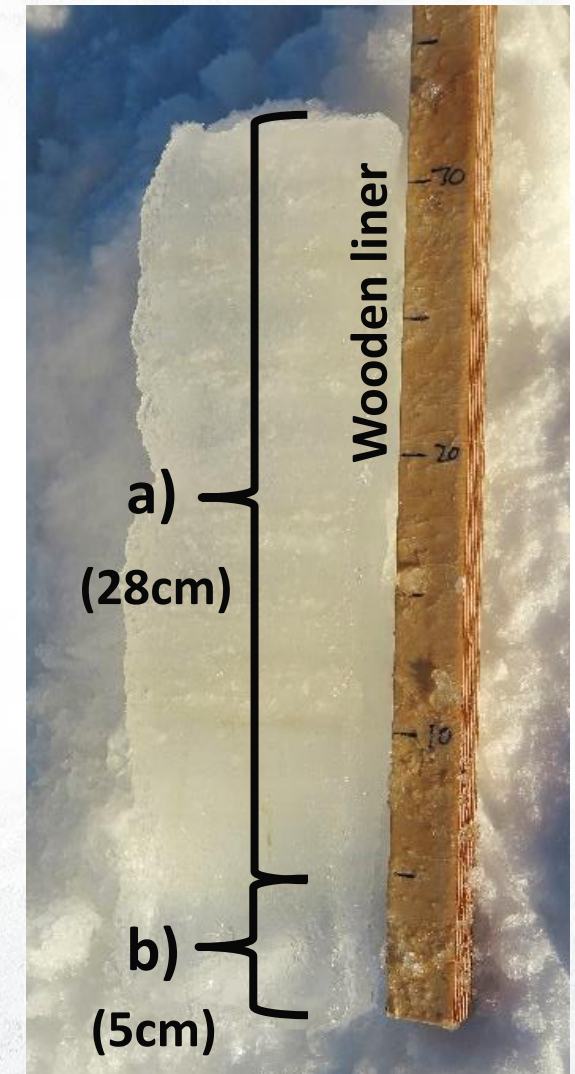

# Observing animals' foot prints

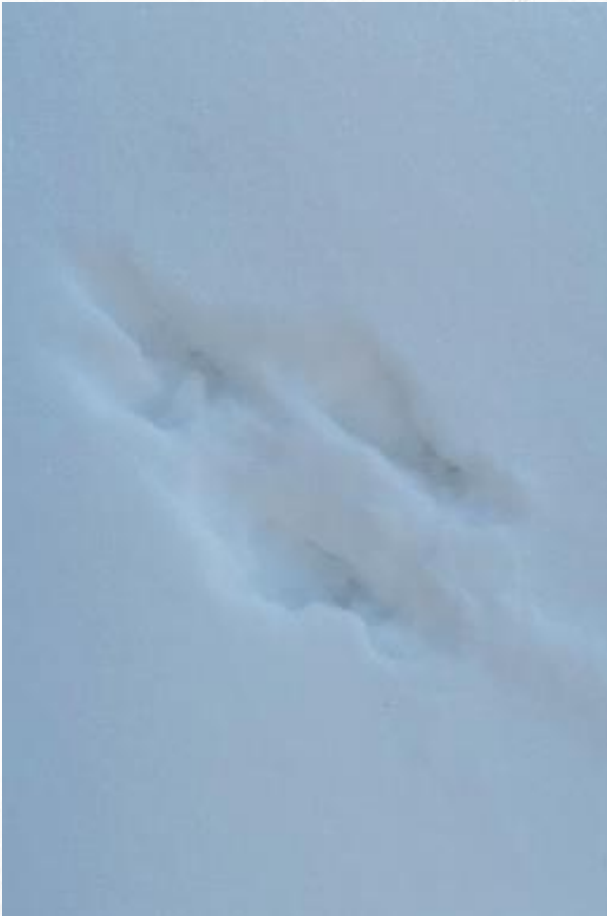

Squirrel

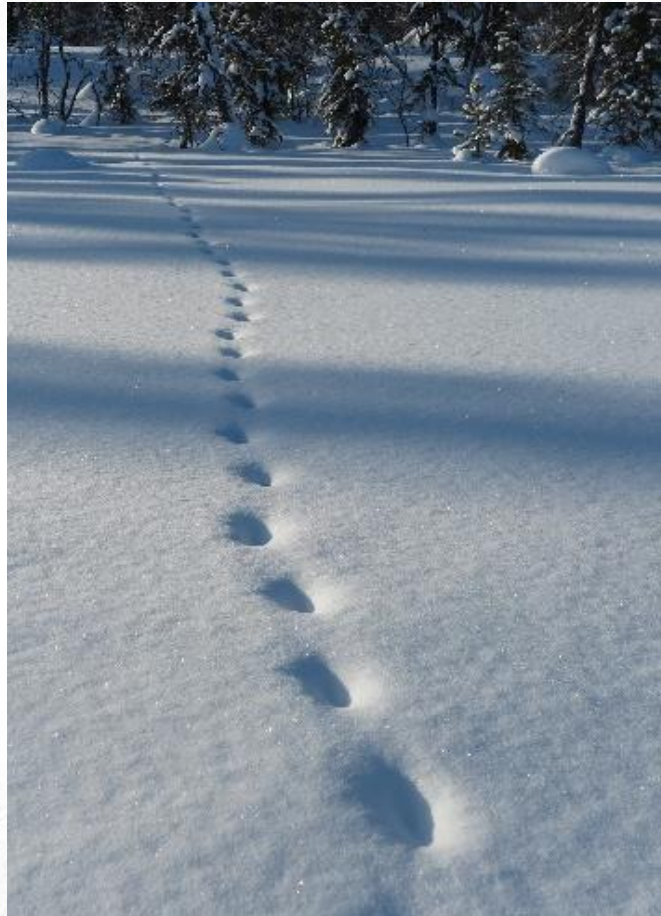

Fox

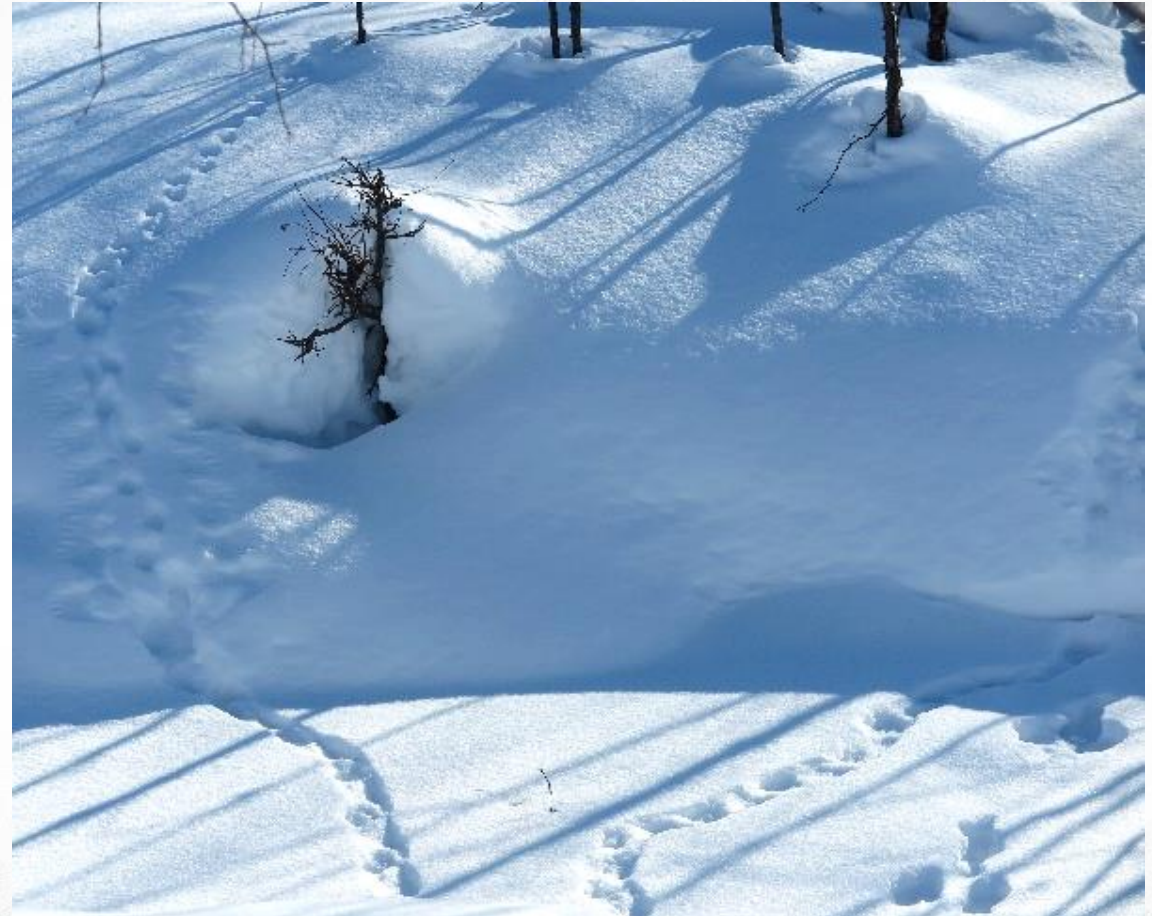

Willow grouse and hare

# Observing animals' foot prints

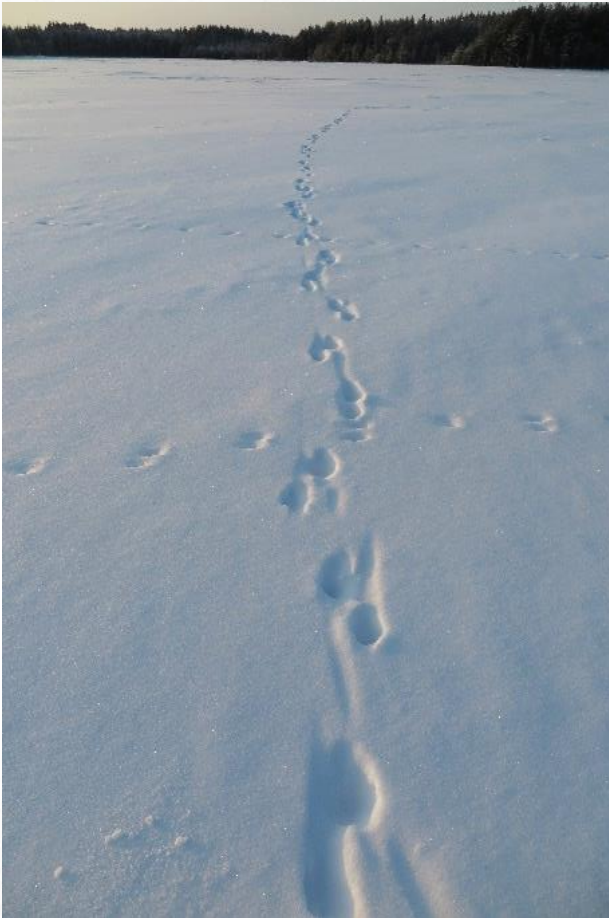

Wulf

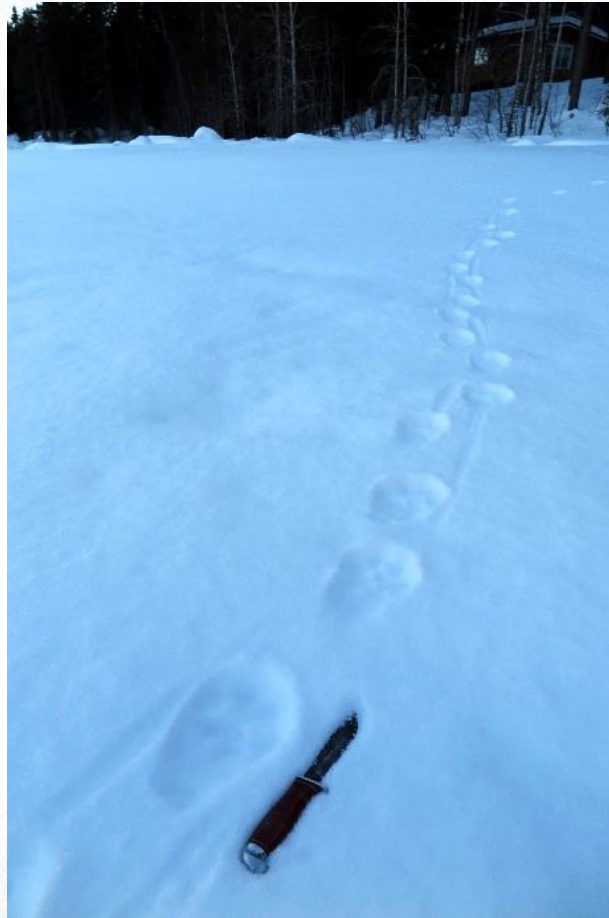

Lynx

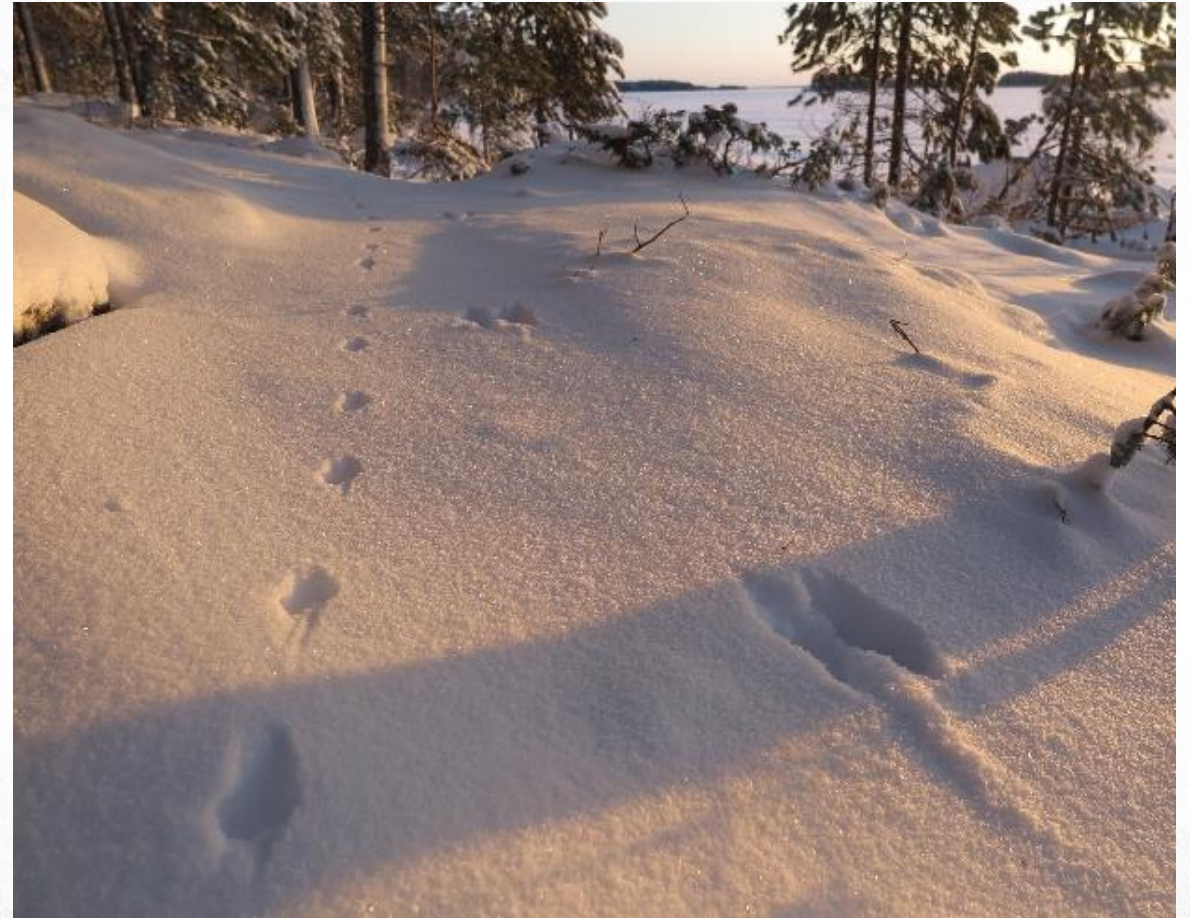

Ermine and Marten

# Notes
